# Supplementary material for: Comparing efficacy in reducing pulling and welfare impacts of four types of leash walking equipment
Source: PeerJ journal article supplement (doi:10.7717/peerj.18131), 2024-10-24
Supplement: Shelter_2_Tension_files.zip [file Tyr_prong_2022915122222 copy.xlsx]

## Sheet: Averaged Newtons
Date	Time	Averaged Newtons	Impuse	Total steps
2022-09-15	12:22:30	4.44197	4.44197	0		Impulse newtons	948.11
2022-09-15	12:22:31	4.58289	9.02486	0		Total steps	14
2022-09-15	12:22:32	4.98447	14.0093	0		# > 5 sec	2
2022-09-15	12:22:33	5.21074	19.2201	0
2022-09-15	12:22:34	5.5113	24.7314	0
2022-09-15	12:22:35	4.80536	29.5367	0
2022-09-15	12:22:36	0.750082	30.2868	0
2022-09-15	12:22:37	1.15048	31.4373	0
2022-09-15	12:22:38	-0.00961979	31.4373	0
2022-09-15	12:22:39	0.574305	32.0116	0
2022-09-15	12:22:40	1.35229	33.3639	0
2022-09-15	12:22:41	2.07641	35.4403	0
2022-09-15	12:22:42	1.49162	36.9319	0
2022-09-15	12:22:43	0.902035	37.834	0
2022-09-15	12:22:44	1.31995	39.1539	0
2022-09-15	12:22:45	3.04328	42.1972	0
2022-09-15	12:22:46	5.20681	47.404	0
2022-09-15	12:22:47	1.71041	49.1144	0
2022-09-15	12:22:48	1.16185	50.2763	0
2022-09-15	12:22:49	0.0272974	50.3036	0
2022-09-15	12:22:50	0.871361	51.1749	0
2022-09-15	12:22:51	1.41686	52.5918	0
2022-09-15	12:22:52	1.22707	53.8188	0
2022-09-15	12:22:53	1.2056	55.0244	0
2022-09-15	12:22:54	0.610185	55.6346	0
2022-09-15	12:22:55	-0.798636	55.6346	0
2022-09-15	12:22:56	-0.698638	55.6346	0
2022-09-15	12:22:57	1.81707	57.4517	0
2022-09-15	12:22:58	1.80594	59.2576	0
2022-09-15	12:22:59	1.41975	60.6774	0
2022-09-15	12:23:00	0.536218	61.2136	0
2022-09-15	12:23:01	-1.39084	61.2136	0
2022-09-15	12:23:02	-1.03389	61.2136	0
2022-09-15	12:23:03	-1.19083	61.2136	0
2022-09-15	12:23:04	-1.02329	61.2136	0
2022-09-15	12:23:05	0.308148	61.5217	0
2022-09-15	12:23:06	0.861571	62.3833	0
2022-09-15	12:23:07	0.152292	62.5356	0
2022-09-15	12:23:08	0.318279	62.8539	0
2022-09-15	12:23:09	-0.124447	62.8539	0
2022-09-15	12:23:10	-0.0629305	62.8539	0
2022-09-15	12:23:11	-0.112392	62.8539	0
2022-09-15	12:23:12	0.315506	63.1694	0
2022-09-15	12:23:13	0.696527	63.8659	0
2022-09-15	12:23:14	0.76559	64.6315	0
2022-09-15	12:23:15	0.515788	65.1473	0
2022-09-15	12:23:16	0.728634	65.8759	0
2022-09-15	12:23:17	0.423373	66.2993	0
2022-09-15	12:23:18	-1.14119	66.2993	0
2022-09-15	12:23:19	-1.47317	66.2993	0
2022-09-15	12:23:20	-0.0125432	66.2993	0
2022-09-15	12:23:21	3.48358	69.7829	0
2022-09-15	12:23:22	1.67713	71.46	0
2022-09-15	12:23:23	0.0828533	71.5429	0
2022-09-15	12:23:24	-0.064741	71.5429	0
2022-09-15	12:23:25	0.789489	72.3324	0
2022-09-15	12:23:26	0.568986	72.9013	0
2022-09-15	12:23:27	-0.555685	72.9013	0
2022-09-15	12:23:28	-0.392545	72.9013	0
2022-09-15	12:23:29	-0.21692	72.9013	0
2022-09-15	12:23:30	-0.348441	72.9013	0
2022-09-15	12:23:31	1.60005	74.5014	0
2022-09-15	12:23:32	10.7675	85.2689	0
2022-09-15	12:23:33	6.46613	91.735	0
2022-09-15	12:23:34	7.83087	99.5659	0
2022-09-15	12:23:35	2.60746	102.173	0
2022-09-15	12:23:36	1.46393	103.637	0
2022-09-15	12:23:37	1.31273	104.95	0
2022-09-15	12:23:38	0.49915	105.449	0
2022-09-15	12:23:39	-0.0465182	105.449	0
2022-09-15	12:23:40	-0.018203	105.449	0
2022-09-15	12:23:41	-1.09264	105.449	0
2022-09-15	12:23:42	-0.910181	105.449	0
2022-09-15	12:23:43	-0.440914	105.449	0
2022-09-15	12:23:44	2.05227	107.501	0
2022-09-15	12:23:45	-0.27487	107.501	0
2022-09-15	12:23:46	1.83118	109.333	0
2022-09-15	12:23:47	1.93785	111.27	0
2022-09-15	12:23:48	1.95862	113.229	0
2022-09-15	12:23:49	6.58713	119.816	0
2022-09-15	12:23:50	2.19552	122.012	0
2022-09-15	12:23:51	2.71895	124.731	0
2022-09-15	12:23:52	13.4627	138.193	1
2022-09-15	12:23:53	2.66173	140.855	1
2022-09-15	12:23:54	1.66026	142.515	1
2022-09-15	12:23:55	0.641593	143.157	1
2022-09-15	12:23:56	1.55236	144.709	1
2022-09-15	12:23:57	1.94629	146.656	1
2022-09-15	12:23:58	1.62812	148.284	1
2022-09-15	12:23:59	2.1121	150.396	1
2022-09-15	12:24:00	2.03491	152.431	1
2022-09-15	12:24:01	0.96423	153.395	1
2022-09-15	12:24:02	0.530502	153.925	1
2022-09-15	12:24:03	0.505489	154.431	1
2022-09-15	12:24:04	0.53339	154.964	1
2022-09-15	12:24:05	0.478664	155.443	1
2022-09-15	12:24:06	0.143067	155.586	1
2022-09-15	12:24:07	-0.734064	155.586	1
2022-09-15	12:24:08	-0.844308	155.586	1
2022-09-15	12:24:09	0.595924	156.182	1
2022-09-15	12:24:10	5.39743	161.579	1
2022-09-15	12:24:11	0.326032	161.905	1
2022-09-15	12:24:12	-0.312109	161.905	1
2022-09-15	12:24:13	0.805373	162.711	1
2022-09-15	12:24:14	0.281815	162.993	1
2022-09-15	12:24:15	1.85445	164.847	1
2022-09-15	12:24:16	0.394547	165.242	1
2022-09-15	12:24:17	-0.963662	165.242	1
2022-09-15	12:24:18	-2.92828	165.242	1
2022-09-15	12:24:19	-3.28108	165.242	1
2022-09-15	12:24:20	7.84744	173.089	1
2022-09-15	12:24:21	16.6067	189.696	2
2022-09-15	12:24:22	1.73542	191.431	2
2022-09-15	12:24:23	1.99824	193.429	2
2022-09-15	12:24:24	2.98695	196.416	2
2022-09-15	12:24:25	2.47815	198.895	2
2022-09-15	12:24:26	1.83112	200.726	2
2022-09-15	12:24:27	2.73423	203.46	2
2022-09-15	12:24:28	2.87497	206.335	2
2022-09-15	12:24:29	2.9361	209.271	2
2022-09-15	12:24:30	3.20169	212.473	2
2022-09-15	12:24:31	3.24209	215.715	2
2022-09-15	12:24:32	3.25973	218.974	2
2022-09-15	12:24:33	3.24854	222.223	2
2022-09-15	12:24:34	3.2387	225.462	2
2022-09-15	12:24:35	3.25149	228.713	2
2022-09-15	12:24:36	3.2549	231.968	2
2022-09-15	12:24:37	3.24	235.208	2
2022-09-15	12:24:38	3.26116	238.469	2
2022-09-15	12:24:39	3.25992	241.729	2
2022-09-15	12:24:40	3.254	244.983	2
2022-09-15	12:24:41	3.24968	248.233	2
2022-09-15	12:24:42	3.24922	251.482	2
2022-09-15	12:24:43	3.26473	254.747	2
2022-09-15	12:24:44	3.26878	258.016	2
2022-09-15	12:24:45	3.25618	261.272	2
2022-09-15	12:24:46	3.26563	264.537	2
2022-09-15	12:24:47	3.25313	267.791	2
2022-09-15	12:24:48	3.26222	271.053	2
2022-09-15	12:24:49	3.24775	274.301	2
2022-09-15	12:24:50	3.26309	277.564	2
2022-09-15	12:24:51	3.24917	280.813	2
2022-09-15	12:24:52	3.26041	284.073	2
2022-09-15	12:24:53	3.25279	287.326	2
2022-09-15	12:24:54	3.24407	290.57	2
2022-09-15	12:24:55	3.24905	293.819	2
2022-09-15	12:24:56	3.26554	297.085	2
2022-09-15	12:24:57	3.25505	300.34	2
2022-09-15	12:24:58	3.24209	303.582	2
2022-09-15	12:24:59	3.26088	306.843	2
2022-09-15	12:25:00	3.2669	310.11	2
2022-09-15	12:25:01	3.25641	313.366	2
2022-09-15	12:25:02	3.2542	316.62	2
2022-09-15	12:25:03	3.24028	319.86	2
2022-09-15	12:25:04	3.26033	323.121	2
2022-09-15	12:25:05	3.23734	326.358	2
2022-09-15	12:25:06	3.25392	329.612	2
2022-09-15	12:25:07	3.2572	332.869	2
2022-09-15	12:25:08	3.26215	336.131	2
2022-09-15	12:25:09	3.26705	339.398	2
2022-09-15	12:25:10	3.27367	342.672	2
2022-09-15	12:25:11	3.26094	345.933	2
2022-09-15	12:25:12	3.27158	349.205	2
2022-09-15	12:25:13	3.2559	352.461	2
2022-09-15	12:25:14	3.2705	355.731	2
2022-09-15	12:25:15	3.21685	358.948	2
2022-09-15	12:25:16	2.95149	361.899	2
2022-09-15	12:25:17	3.25075	365.15	2
2022-09-15	12:25:18	3.1808	368.331	2
2022-09-15	12:25:19	3.27033	371.601	2
2022-09-15	12:25:20	3.25724	374.859	2
2022-09-15	12:25:21	3.27039	378.129	2
2022-09-15	12:25:22	3.26733	381.396	2
2022-09-15	12:25:23	3.26631	384.663	2
2022-09-15	12:25:24	3.26509	387.928	2
2022-09-15	12:25:25	3.26694	391.195	2
2022-09-15	12:25:26	3.26043	394.455	2
2022-09-15	12:25:27	3.25483	397.71	2
2022-09-15	12:25:28	3.24917	400.959	2
2022-09-15	12:25:29	3.26416	404.223	2
2022-09-15	12:25:30	3.25658	407.48	2
2022-09-15	12:25:31	3.25573	410.735	2
2022-09-15	12:25:32	4.18522	414.921	2
2022-09-15	12:25:33	3.23547	418.156	2
2022-09-15	12:25:34	3.25137	421.408	2
2022-09-15	12:25:35	3.25126	424.659	2
2022-09-15	12:25:36	3.25656	427.915	2
2022-09-15	12:25:37	3.24238	431.158	2
2022-09-15	12:25:38	5.11956	436.277	2
2022-09-15	12:25:39	4.32036	440.598	2
2022-09-15	12:25:40	3.49568	444.093	2
2022-09-15	12:25:41	3.40344	447.497	2
2022-09-15	12:25:42	10.5874	458.084	2
2022-09-15	12:25:43	9.00467	467.089	2
2022-09-15	12:25:44	3.26939	470.358	2
2022-09-15	12:25:45	7.1878	477.546	2
2022-09-15	12:25:46	6.28186	483.828	2
2022-09-15	12:25:47	3.79257	487.62	2
2022-09-15	12:25:48	2.91625	490.537	2
2022-09-15	12:25:49	2.6456	493.182	2
2022-09-15	12:25:50	2.39999	495.582	2
2022-09-15	12:25:51	2.49037	498.073	2
2022-09-15	12:25:52	-0.177568	498.073	2
2022-09-15	12:25:53	0.246804	498.319	2
2022-09-15	12:25:54	1.39009	499.71	2
2022-09-15	12:25:55	2.55506	502.265	2
2022-09-15	12:25:56	2.04789	504.313	2
2022-09-15	12:25:57	1.96089	506.273	2
2022-09-15	12:25:58	2.02987	508.303	2
2022-09-15	12:25:59	2.05025	510.354	2
2022-09-15	12:26:00	1.98956	512.343	2
2022-09-15	12:26:01	1.764	514.107	2
2022-09-15	12:26:02	1.76044	515.868	2
2022-09-15	12:26:03	1.82031	517.688	2
2022-09-15	12:26:04	1.87685	519.565	2
2022-09-15	12:26:05	1.92987	521.495	2
2022-09-15	12:26:06	1.89315	523.388	2
2022-09-15	12:26:07	1.67815	525.066	2
2022-09-15	12:26:08	1.40447	526.47	2
2022-09-15	12:26:09	1.45206	527.922	2
2022-09-15	12:26:10	1.26134	529.184	2
2022-09-15	12:26:11	1.25263	530.436	2
2022-09-15	12:26:12	1.29958	531.736	2
2022-09-15	12:26:13	1.73785	533.474	2
2022-09-15	12:26:14	-0.122126	533.474	2
2022-09-15	12:26:15	-2.02285	533.474	2
2022-09-15	12:26:16	-4.1737	533.474	2
2022-09-15	12:26:17	-5.27156	533.474	2
2022-09-15	12:26:18	-3.67293	533.474	2
2022-09-15	12:26:19	-2.03146	533.474	2
2022-09-15	12:26:20	0.358253	533.832	2
2022-09-15	12:26:21	2.1091	535.941	2
2022-09-15	12:26:22	8.23375	544.175	2
2022-09-15	12:26:23	4.33099	548.506	2
2022-09-15	12:26:24	1.42627	549.932	2
2022-09-15	12:26:25	12.2246	562.157	2
2022-09-15	12:26:26	1.16344	563.32	2
2022-09-15	12:26:27	0.615336	563.936	2
2022-09-15	12:26:28	1.05687	564.992	2
2022-09-15	12:26:29	17.8941	582.886	3
2022-09-15	12:26:30	7.00331	589.89	3
2022-09-15	12:26:31	13.4997	603.389	4
2022-09-15	12:26:32	4.49927	607.889	4
2022-09-15	12:26:33	2.42851	610.317	4
2022-09-15	12:26:34	2.26315	612.58	4
2022-09-15	12:26:35	2.1679	614.748	4
2022-09-15	12:26:36	2.38428	617.133	4
2022-09-15	12:26:37	2.25687	619.389	4
2022-09-15	12:26:38	2.31221	621.702	4
2022-09-15	12:26:39	2.2932	623.995	4
2022-09-15	12:26:40	2.33591	626.331	4
2022-09-15	12:26:41	2.30441	628.635	4
2022-09-15	12:26:42	2.32371	630.959	4
2022-09-15	12:26:43	2.29586	633.255	4
2022-09-15	12:26:44	2.21872	635.473	4
2022-09-15	12:26:45	2.19043	637.664	4
2022-09-15	12:26:46	2.38556	640.049	4
2022-09-15	12:26:47	0.329711	640.379	4
2022-09-15	12:26:48	-0.255817	640.379	4
2022-09-15	12:26:49	-1.061	640.379	4
2022-09-15	12:26:50	-1.44459	640.379	4
2022-09-15	12:26:51	-0.998522	640.379	4
2022-09-15	12:26:52	-0.767114	640.379	4
2022-09-15	12:26:53	-0.557212	640.379	4
2022-09-15	12:26:54	-0.256761	640.379	4
2022-09-15	12:26:55	0.103623	640.483	4
2022-09-15	12:26:56	0.209904	640.693	4
2022-09-15	12:26:57	0.453253	641.146	4
2022-09-15	12:26:58	-0.186246	641.146	4
2022-09-15	12:26:59	2.99841	644.144	4
2022-09-15	12:27:00	1.4966	645.641	4
2022-09-15	12:27:01	3.68884	649.33	4
2022-09-15	12:27:02	-0.559759	649.33	4
2022-09-15	12:27:03	-0.601299	649.33	4
2022-09-15	12:27:04	-0.500827	649.33	4
2022-09-15	12:27:05	0.0427847	649.373	4
2022-09-15	12:27:06	1.01041	650.383	4
2022-09-15	12:27:07	4.90519	655.288	4
2022-09-15	12:27:08	2.23744	657.526	4
2022-09-15	12:27:09	4.58114	662.107	4
2022-09-15	12:27:10	7.14956	669.256	4
2022-09-15	12:27:11	10.1125	679.369	4
2022-09-15	12:27:12	4.46682	683.836	4
2022-09-15	12:27:13	15.4068	699.242	5
2022-09-15	12:27:14	19.5004	718.743	6
2022-09-15	12:27:15	12.4497	731.192	6
2022-09-15	12:27:16	14.2258	745.418	7
2022-09-15	12:27:17	13.594	759.012	8
2022-09-15	12:27:18	29.1868	788.199	9
2022-09-15	12:27:19	12.2705	800.47	9
2022-09-15	12:27:20	9.31631	809.786	9
2022-09-15	12:27:21	5.53976	815.326	9
2022-09-15	12:27:22	4.43309	819.759	9
2022-09-15	12:27:23	24.546	844.305	10
2022-09-15	12:27:24	25.4817	869.786	11
2022-09-15	12:27:25	27.8806	897.667	12
2022-09-15	12:27:26	14.9766	912.644	13
2022-09-15	12:27:27	18.2846	930.928	14
2022-09-15	12:27:28	9.22626	940.154	14
2022-09-15	12:27:29	3.96608	944.121	14
2022-09-15	12:27:30	3.98894	948.11	14

## Sheet: Tyr_prong_2022915122222 (4)
Date	Time	Lbs	Newtons	Averaged Newtons	Total force x time		Total steps > 13.345	**GoPro Fitting: 1211
2022-09-15	12:22:30	0.980471	4.36133	4.44197	4.36133	FALSE	0
2022-09-15	12:22:30	0.987239	4.39144	4.44197	4.39144	FALSE	0
2022-09-15	12:22:30	1.00846	4.48583	4.44197	8.84716	FALSE	0
2022-09-15	12:22:30	1.01823	4.52929	4.44197	8.92073	FALSE	0
2022-09-15	12:22:31	1.025	4.5594	4.58289	13.4066	FALSE	0
2022-09-15	12:22:31	1.01263	4.50438	4.58289	13.4251	FALSE	0
2022-09-15	12:22:31	1.04485	4.6477	4.58289	18.0543	FALSE	0
2022-09-15	12:22:31	1.03864	4.62008	4.58289	18.0452	FALSE	0
2022-09-15	12:22:32	1.06922	4.7561	4.98447	22.8104	FALSE	0
2022-09-15	12:22:32	1.08475	4.82518	4.98447	22.8704	FALSE	0
2022-09-15	12:22:32	1.16872	5.1987	4.98447	28.0091	FALSE	0
2022-09-15	12:22:32	1.15955	5.15791	4.98447	28.0283	FALSE	0
2022-09-15	12:22:33	1.16505	5.18238	5.21074	33.1914	FALSE	0
2022-09-15	12:22:33	1.16169	5.16743	5.21074	33.1957	FALSE	0
2022-09-15	12:22:33	1.18754	5.28242	5.21074	38.4739	FALSE	0
2022-09-15	12:22:34	1.21869	5.42098	5.5113	38.6167	FALSE	0
2022-09-15	12:22:34	1.23803	5.50701	5.5113	43.9809	FALSE	0
2022-09-15	12:22:34	1.24057	5.5183	5.5113	44.135	FALSE	0
2022-09-15	12:22:34	1.25869	5.5989	5.5113	49.5798	FALSE	0
2022-09-15	12:22:35	1.24719	5.54775	4.80536	49.6827	FALSE	0
2022-09-15	12:22:35	1.25345	5.5756	4.80536	55.1554	FALSE	0
2022-09-15	12:22:35	1.31187	5.83546	4.80536	55.5182	FALSE	0
2022-09-15	12:22:35	0.508664	2.26264	4.80536	57.418	FALSE	0
2022-09-15	12:22:36	0.208817	0.92886	0.750082	56.4471	FALSE	0
2022-09-15	12:22:36	0.152837	0.67985	0.750082	58.0979	FALSE	0
2022-09-15	12:22:36	0.141387	0.628918	0.750082	57.076	FALSE	0
2022-09-15	12:22:36	0.171463	0.762702	0.750082	58.8606	FALSE	0
2022-09-15	12:22:37	0.284593	1.26593	1.15048	58.3419	FALSE	0
2022-09-15	12:22:37	0.305305	1.35806	1.15048	60.2186	FALSE	0
2022-09-15	12:22:37	0.186018	0.827445	1.15048	59.1694	FALSE	0
2022-09-15	12:22:38	0.0979264	0.435596	-0.00961979	60.6542	FALSE	0
2022-09-15	12:22:38	-0.0436511	-0.194169	-0.00961979	59.1694	FALSE	0
2022-09-15	12:22:38	-0.041412	-0.184209	-0.00961979	60.6542	FALSE	0
2022-09-15	12:22:38	-0.0215138	-0.0956977	-0.00961979	59.1694	FALSE	0
2022-09-15	12:22:39	0.229071	1.01895	0.574305	61.6732	FALSE	0
2022-09-15	12:22:39	0.0305982	0.136107	0.574305	59.3055	FALSE	0
2022-09-15	12:22:39	0.196552	0.874303	0.574305	62.5475	FALSE	0
2022-09-15	12:22:39	0.0602165	0.267855	0.574305	59.5733	FALSE	0
2022-09-15	12:22:40	0.414262	1.84272	1.35229	64.3902	FALSE	0
2022-09-15	12:22:40	0.176349	0.784436	1.35229	60.3577	FALSE	0
2022-09-15	12:22:40	0.433041	1.92625	1.35229	66.3164	FALSE	0
2022-09-15	12:22:40	0.192379	0.85574	1.35229	61.2135	FALSE	0
2022-09-15	12:22:41	0.610547	2.71584	2.07641	69.0323	FALSE	0
2022-09-15	12:22:41	0.3764	1.6743	2.07641	62.8878	FALSE	0
2022-09-15	12:22:41	0.413448	1.8391	2.07641	70.8714	FALSE	0
2022-09-15	12:22:42	0.363219	1.61567	1.49162	64.5035	FALSE	0
2022-09-15	12:22:42	0.324797	1.44476	1.49162	72.3161	FALSE	0
2022-09-15	12:22:42	0.306527	1.36349	1.49162	65.867	FALSE	0
2022-09-15	12:22:42	0.346781	1.54255	1.49162	73.8587	FALSE	0
2022-09-15	12:22:43	0.0730918	0.325127	0.902035	66.1921	FALSE	0
2022-09-15	12:22:43	0.183626	0.816805	0.902035	74.6755	FALSE	0
2022-09-15	12:22:43	0.309937	1.37866	0.902035	67.5707	FALSE	0
2022-09-15	12:22:43	0.244491	1.08754	0.902035	75.763	FALSE	0
2022-09-15	12:22:44	0.34271	1.52444	1.31995	69.0952	FALSE	0
2022-09-15	12:22:44	0.275331	1.22473	1.31995	76.9878	FALSE	0
2022-09-15	12:22:44	0.272176	1.21069	1.31995	70.3059	FALSE	0
2022-09-15	12:22:45	0.540267	2.40322	3.04328	79.391	FALSE	0
2022-09-15	12:22:45	0.60159	2.67599	3.04328	72.9819	FALSE	0
2022-09-15	12:22:45	0.720165	3.20344	3.04328	82.5944	FALSE	0
2022-09-15	12:22:45	0.874619	3.89048	3.04328	76.8724	FALSE	0
2022-09-15	12:22:46	1.10296	4.90619	5.20681	87.5006	FALSE	0
2022-09-15	12:22:46	1.2366	5.50064	5.20681	82.373	FALSE	0
2022-09-15	12:22:46	1.75385	7.80148	5.20681	95.3021	FALSE	0
2022-09-15	12:22:46	0.588766	2.61895	5.20681	84.9919	FALSE	0
2022-09-15	12:22:47	0.291921	1.29852	1.71041	96.6006	FALSE	0
2022-09-15	12:22:47	0.460929	2.0503	1.71041	87.0423	FALSE	0
2022-09-15	12:22:47	0.43757	1.9464	1.71041	98.547	FALSE	0
2022-09-15	12:22:47	0.347646	1.5464	1.71041	88.5886	FALSE	0
2022-09-15	12:22:48	0.283779	1.26231	1.16185	99.8093	FALSE	0
2022-09-15	12:22:48	0.419453	1.86581	1.16185	90.4545	FALSE	0
2022-09-15	12:22:48	0.137672	0.612393	1.16185	100.422	FALSE	0
2022-09-15	12:22:48	0.203881	0.906903	1.16185	91.3614	FALSE	0
2022-09-15	12:22:49	0.277723	1.23537	0.0272974	101.657	FALSE	0
2022-09-15	12:22:49	-0.0382568	-0.170174	0.0272974	91.3614	FALSE	0
2022-09-15	12:22:49	-0.221056	-0.983301	0.0272974	101.657	FALSE	0
2022-09-15	12:22:50	-0.0268572	-0.119466	0.871361	91.3614	FALSE	0
2022-09-15	12:22:50	0.205967	0.916182	0.871361	102.573	FALSE	0
2022-09-15	12:22:50	0.472532	2.10192	0.871361	93.4633	FALSE	0
2022-09-15	12:22:50	0.131921	0.586811	0.871361	103.16	FALSE	0
2022-09-15	12:22:51	0.324033	1.44136	1.41686	94.9046	FALSE	0
2022-09-15	12:22:51	0.216959	0.965077	1.41686	104.125	FALSE	0
2022-09-15	12:22:51	0.533448	2.37288	1.41686	97.2775	FALSE	0
2022-09-15	12:22:51	0.199657	0.888114	1.41686	105.013	FALSE	0
2022-09-15	12:22:52	0.369784	1.64487	1.22707	98.9224	FALSE	0
2022-09-15	12:22:52	0.18958	0.84329	1.22707	105.857	FALSE	0
2022-09-15	12:22:52	0.268206	1.19303	1.22707	100.115	FALSE	0
2022-09-15	12:22:53	0.252786	1.12444	1.2056	106.981	FALSE	0
2022-09-15	12:22:53	0.287799	1.28019	1.2056	101.396	FALSE	0
2022-09-15	12:22:53	0.323321	1.4382	1.2056	108.419	FALSE	0
2022-09-15	12:22:53	0.220216	0.979565	1.2056	102.375	FALSE	0
2022-09-15	12:22:54	0.28673	1.27543	0.610185	109.695	FALSE	0
2022-09-15	12:22:54	0.182761	0.812957	0.610185	103.188	FALSE	0
2022-09-15	12:22:54	0.109631	0.487661	0.610185	110.182	FALSE	0
2022-09-15	12:22:54	-0.0304196	-0.135312	0.610185	103.188	FALSE	0
2022-09-15	12:22:55	-0.0661956	-0.294451	-0.798636	110.182	FALSE	0
2022-09-15	12:22:55	-0.0920481	-0.409448	-0.798636	103.188	FALSE	0
2022-09-15	12:22:55	-0.111437	-0.495694	-0.798636	110.182	FALSE	0
2022-09-15	12:22:55	-0.448485	-1.99495	-0.798636	103.188	FALSE	0
2022-09-15	12:22:56	-0.674287	-2.99936	-0.698638	110.182	FALSE	0
2022-09-15	12:22:56	-0.350317	-1.55828	-0.698638	103.188	FALSE	0
2022-09-15	12:22:56	0.133804	0.595187	-0.698638	110.777	FALSE	0
2022-09-15	12:22:56	0.262557	1.16791	-0.698638	104.356	FALSE	0
2022-09-15	12:22:57	0.49584	2.2056	1.81707	112.983	FALSE	0
2022-09-15	12:22:57	0.294618	1.31052	1.81707	105.667	FALSE	0
2022-09-15	12:22:57	0.435026	1.93508	1.81707	114.918	FALSE	0
2022-09-15	12:22:58	0.412074	1.83299	1.80594	107.5	FALSE	0
2022-09-15	12:22:58	0.508257	2.26083	1.80594	117.179	FALSE	0
2022-09-15	12:22:58	0.349377	1.5541	1.80594	109.054	FALSE	0
2022-09-15	12:22:58	0.354262	1.57583	1.80594	118.755	FALSE	0
2022-09-15	12:22:59	0.371768	1.6537	1.41975	110.707	FALSE	0
2022-09-15	12:22:59	0.315738	1.40447	1.41975	120.159	FALSE	0
2022-09-15	12:22:59	0.26042	1.1584	1.41975	111.866	FALSE	0
2022-09-15	12:22:59	0.328766	1.46242	1.41975	121.622	FALSE	0
2022-09-15	12:23:00	0.730496	3.24939	0.536218	115.115	FALSE	0
2022-09-15	12:23:00	0.638995	2.84238	0.536218	124.464	FALSE	0
2022-09-15	12:23:00	-0.290267	-1.29117	0.536218	115.115	FALSE	0
2022-09-15	12:23:00	-0.597035	-2.65573	0.536218	124.464	FALSE	0
2022-09-15	12:23:01	-0.473524	-2.10633	-1.39084	115.115	FALSE	0
2022-09-15	12:23:01	-0.246755	-1.09762	-1.39084	124.464	FALSE	0
2022-09-15	12:23:01	-0.217748	-0.968587	-1.39084	115.115	FALSE	0
2022-09-15	12:23:02	-0.324567	-1.44374	-1.03389	124.464	FALSE	0
2022-09-15	12:23:02	-0.204872	-0.911312	-1.03389	115.115	FALSE	0
2022-09-15	12:23:02	-0.297035	-1.32127	-1.03389	124.464	FALSE	0
2022-09-15	12:23:02	-0.103244	-0.45925	-1.03389	115.115	FALSE	0
2022-09-15	12:23:03	-0.330419	-1.46977	-1.19083	124.464	FALSE	0
2022-09-15	12:23:03	-0.249911	-1.11165	-1.19083	115.115	FALSE	0
2022-09-15	12:23:03	-0.286297	-1.27351	-1.19083	124.464	FALSE	0
2022-09-15	12:23:03	-0.204211	-0.908371	-1.19083	115.115	FALSE	0
2022-09-15	12:23:04	-0.31444	-1.39869	-1.02329	124.464	FALSE	0
2022-09-15	12:23:04	-0.160954	-0.715956	-1.02329	115.115	FALSE	0
2022-09-15	12:23:04	-0.214745	-0.955229	-1.02329	124.464	FALSE	0
2022-09-15	12:23:05	-0.0844145	-0.375493	0.308148	115.115	FALSE	0
2022-09-15	12:23:05	-0.118257	-0.526031	0.308148	124.464	FALSE	0
2022-09-15	12:23:05	0.22612	1.00583	0.308148	116.121	FALSE	0
2022-09-15	12:23:05	0.253651	1.12829	0.308148	125.592	FALSE	0
2022-09-15	12:23:06	0.217519	0.967568	0.861571	117.089	FALSE	0
2022-09-15	12:23:06	0.111667	0.496717	0.861571	126.089	FALSE	0
2022-09-15	12:23:06	0.26327	1.17108	0.861571	118.26	FALSE	0
2022-09-15	12:23:06	0.182303	0.81092	0.861571	126.9	FALSE	0
2022-09-15	12:23:07	0.0645422	0.287097	0.152292	118.547	FALSE	0
2022-09-15	12:23:07	0.0138043	0.0614043	0.152292	126.961	FALSE	0
2022-09-15	12:23:07	0.0498857	0.221902	0.152292	118.769	FALSE	0
2022-09-15	12:23:07	0.00871527	0.0387673	0.152292	127	FALSE	0
2022-09-15	12:23:08	0.0312597	0.139049	0.318279	118.908	FALSE	0
2022-09-15	12:23:08	0.0501401	0.223033	0.318279	127.223	FALSE	0
2022-09-15	12:23:08	0.132583	0.589756	0.318279	119.497	FALSE	0
2022-09-15	12:23:08	0.0722267	0.321279	0.318279	127.544	FALSE	0
2022-09-15	12:23:09	-0.0947961	-0.421672	-0.124447	119.497	FALSE	0
2022-09-15	12:23:09	0.0160435	0.0713647	-0.124447	127.616	FALSE	0
2022-09-15	12:23:09	-0.00517788	-0.0230322	-0.124447	119.497	FALSE	0
2022-09-15	12:23:10	0.032074	0.142672	-0.0629305	127.759	FALSE	0
2022-09-15	12:23:10	-0.100089	-0.445216	-0.0629305	119.497	FALSE	0
2022-09-15	12:23:10	0.0150765	0.0670633	-0.0629305	127.826	FALSE	0
2022-09-15	12:23:10	-0.00365114	-0.016241	-0.0629305	119.497	FALSE	0
2022-09-15	12:23:11	0.0140078	0.0623095	-0.112392	127.888	FALSE	0
2022-09-15	12:23:11	-0.100445	-0.446799	-0.112392	119.497	FALSE	0
2022-09-15	12:23:11	-0.0109794	-0.0488386	-0.112392	127.888	FALSE	0
2022-09-15	12:23:11	-0.00365114	-0.016241	-0.112392	119.497	FALSE	0
2022-09-15	12:23:12	-0.112964	-0.502486	0.315506	127.888	FALSE	0
2022-09-15	12:23:12	0.0728883	0.324222	0.315506	119.822	FALSE	0
2022-09-15	12:23:12	0.0559417	0.24884	0.315506	128.137	FALSE	0
2022-09-15	12:23:12	0.26785	1.19145	0.315506	121.013	FALSE	0
2022-09-15	12:23:13	0.172481	0.76723	0.696527	128.904	FALSE	0
2022-09-15	12:23:13	0.230293	1.02439	0.696527	122.037	FALSE	0
2022-09-15	12:23:13	0.066985	0.297963	0.696527	129.202	FALSE	0
2022-09-15	12:23:14	0.234924	1.04499	0.76559	123.082	FALSE	0
2022-09-15	12:23:14	0.167952	0.747084	0.76559	129.949	FALSE	0
2022-09-15	12:23:14	0.028359	0.126147	0.76559	123.209	FALSE	0
2022-09-15	12:23:14	0.257214	1.14414	0.76559	131.093	FALSE	0
2022-09-15	12:23:15	0.00138701	0.0061697	0.515788	123.215	FALSE	0
2022-09-15	12:23:15	0.22159	0.985677	0.515788	132.079	FALSE	0
2022-09-15	12:23:15	0.0583336	0.25948	0.515788	123.474	FALSE	0
2022-09-15	12:23:15	0.182507	0.811828	0.515788	132.891	FALSE	0
2022-09-15	12:23:16	-0.0133204	-0.0592518	0.728634	123.474	FALSE	0
2022-09-15	12:23:16	0.123779	0.550594	0.728634	133.441	FALSE	0
2022-09-15	12:23:16	0.133702	0.594733	0.728634	124.069	FALSE	0
2022-09-15	12:23:16	0.411056	1.82846	0.728634	135.27	FALSE	0
2022-09-15	12:23:17	0.156858	0.697736	0.423373	124.767	FALSE	0
2022-09-15	12:23:17	0.112074	0.498528	0.423373	135.768	FALSE	0
2022-09-15	12:23:17	0.0166033	0.0738548	0.423373	124.841	FALSE	0
2022-09-15	12:23:18	-0.0638038	-0.283812	-1.14119	135.768	FALSE	0
2022-09-15	12:23:18	-0.227061	-1.01001	-1.14119	124.841	FALSE	0
2022-09-15	12:23:18	-0.419936	-1.86796	-1.14119	135.768	FALSE	0
2022-09-15	12:23:18	-0.315407	-1.40299	-1.14119	124.841	FALSE	0
2022-09-15	12:23:19	-0.37215	-1.6554	-1.47317	135.768	FALSE	0
2022-09-15	12:23:19	-0.399173	-1.7756	-1.47317	124.841	FALSE	0
2022-09-15	12:23:19	-0.322175	-1.4331	-1.47317	135.768	FALSE	0
2022-09-15	12:23:19	-0.231234	-1.02858	-1.47317	124.841	FALSE	0
2022-09-15	12:23:20	-0.0713865	-0.317541	-0.0125432	135.768	FALSE	0
2022-09-15	12:23:20	-0.155661	-0.692411	-0.0125432	124.841	FALSE	0
2022-09-15	12:23:20	0.218588	0.972323	-0.0125432	136.741	FALSE	0
2022-09-15	12:23:21	0.351667	1.56429	3.48358	126.405	FALSE	0
2022-09-15	12:23:21	0.999504	4.44599	3.48358	141.187	FALSE	0
2022-09-15	12:23:21	0.888461	3.95205	3.48358	130.357	FALSE	0
2022-09-15	12:23:21	0.892939	3.97197	3.48358	145.159	FALSE	0
2022-09-15	12:23:22	0.866527	3.85449	1.67713	134.211	FALSE	0
2022-09-15	12:23:22	0.0975193	0.433785	1.67713	145.592	FALSE	0
2022-09-15	12:23:22	0.221285	0.98432	1.67713	135.196	FALSE	0
2022-09-15	12:23:22	0.322812	1.43593	1.67713	147.028	FALSE	0
2022-09-15	12:23:23	-0.0326588	-0.145273	0.0828533	135.196	FALSE	0
2022-09-15	12:23:23	0.0674429	0.3	0.0828533	147.328	FALSE	0
2022-09-15	12:23:23	-0.0669081	-0.297621	0.0828533	135.196	FALSE	0
2022-09-15	12:23:23	0.106629	0.474307	0.0828533	147.803	FALSE	0
2022-09-15	12:23:24	-0.118918	-0.528971	-0.064741	135.196	FALSE	0
2022-09-15	12:23:24	-0.0494527	-0.219976	-0.064741	147.803	FALSE	0
2022-09-15	12:23:24	0.0970612	0.431748	-0.064741	135.627	FALSE	0
2022-09-15	12:23:24	0.0130918	0.0582349	-0.064741	147.861	FALSE	0
2022-09-15	12:23:25	0.140827	0.626427	0.789489	136.254	FALSE	0
2022-09-15	12:23:25	0.177417	0.789186	0.789489	148.65	FALSE	0
2022-09-15	12:23:25	0.214211	0.952853	0.789489	137.207	FALSE	0
2022-09-15	12:23:26	0.137163	0.610128	0.568986	149.26	FALSE	0
2022-09-15	12:23:26	0.136603	0.607637	0.568986	137.814	FALSE	0
2022-09-15	12:23:26	0.124797	0.555122	0.568986	149.815	FALSE	0
2022-09-15	12:23:26	0.113092	0.503056	0.568986	138.317	FALSE	0
2022-09-15	12:23:27	0.0420994	0.187267	-0.555685	150.002	FALSE	0
2022-09-15	12:23:27	-0.176374	-0.784547	-0.555685	138.317	FALSE	0
2022-09-15	12:23:27	-0.285687	-1.27079	-0.555685	150.002	FALSE	0
2022-09-15	12:23:27	-0.0797325	-0.354666	-0.555685	138.317	FALSE	0
2022-09-15	12:23:28	-0.128282	-0.570624	-0.392545	150.002	FALSE	0
2022-09-15	12:23:28	-0.078104	-0.347422	-0.392545	138.317	FALSE	0
2022-09-15	12:23:28	-0.0583585	-0.25959	-0.392545	150.002	FALSE	0
2022-09-15	12:23:29	-0.0790201	-0.351497	-0.21692	138.317	FALSE	0
2022-09-15	12:23:29	0.0280028	0.124562	-0.21692	150.127	FALSE	0
2022-09-15	12:23:29	-0.143448	-0.638085	-0.21692	138.317	FALSE	0
2022-09-15	12:23:29	-0.000597729	-0.00265882	-0.21692	150.127	FALSE	0
2022-09-15	12:23:30	-0.12986	-0.577643	-0.348441	138.317	FALSE	0
2022-09-15	12:23:30	-0.0656867	-0.292188	-0.348441	150.127	FALSE	0
2022-09-15	12:23:30	-0.0502669	-0.223597	-0.348441	138.317	FALSE	0
2022-09-15	12:23:30	-0.0675188	-0.300337	-0.348441	150.127	FALSE	0
2022-09-15	12:23:31	0.178944	0.795979	1.60005	139.113	FALSE	0
2022-09-15	12:23:31	-0.18131	-0.806503	1.60005	150.127	FALSE	0
2022-09-15	12:23:31	0.110293	0.490605	1.60005	139.604	FALSE	0
2022-09-15	12:23:31	1.3309	5.92011	1.60005	156.047	FALSE	0
2022-09-15	12:23:32	3.05691	13.5977	10.7675	153.202	1	1
2022-09-15	12:23:32	2.82317	12.558	10.7675	168.605	FALSE	1
2022-09-15	12:23:32	2.28851	10.1798	10.7675	163.382	FALSE	1
2022-09-15	12:23:32	1.51396	6.7344	10.7675	175.34	FALSE	1
2022-09-15	12:23:33	1.32164	5.87892	6.46613	169.26	FALSE	1
2022-09-15	12:23:33	1.93604	8.61189	6.46613	183.951	FALSE	1
2022-09-15	12:23:33	1.10327	4.90757	6.46613	174.168	FALSE	1
2022-09-15	12:23:34	2.52607	11.2365	7.83087	195.188	FALSE	1
2022-09-15	12:23:34	1.76607	7.85583	7.83087	182.024	FALSE	1
2022-09-15	12:23:34	1.00632	4.47631	7.83087	199.664	FALSE	1
2022-09-15	12:23:34	1.74337	7.75486	7.83087	189.779	FALSE	1
2022-09-15	12:23:35	0.790344	3.51561	2.60746	203.18	FALSE	1
2022-09-15	12:23:35	0.697163	3.10112	2.60746	192.88	FALSE	1
2022-09-15	12:23:35	0.534109	2.37582	2.60746	205.556	FALSE	1
2022-09-15	12:23:35	0.323117	1.43729	2.60746	194.317	FALSE	1
2022-09-15	12:23:36	0.355178	1.5799	1.46393	207.136	FALSE	1
2022-09-15	12:23:36	0.191972	0.85393	1.46393	195.171	FALSE	1
2022-09-15	12:23:36	0.440166	1.95795	1.46393	209.094	FALSE	1
2022-09-15	12:23:37	0.291311	1.29581	1.31273	196.467	FALSE	1
2022-09-15	12:23:37	0.330649	1.47079	1.31273	210.564	FALSE	1
2022-09-15	12:23:37	0.337214	1.5	1.31273	197.967	FALSE	1
2022-09-15	12:23:37	0.221285	0.98432	1.31273	211.549	FALSE	1
2022-09-15	12:23:38	0.227443	1.01171	0.49915	198.979	FALSE	1
2022-09-15	12:23:38	0.190089	0.845554	0.49915	212.394	FALSE	1
2022-09-15	12:23:38	0.0715142	0.318109	0.49915	199.297	FALSE	1
2022-09-15	12:23:38	-0.0401906	-0.178776	0.49915	212.394	FALSE	1
2022-09-15	12:23:39	-0.090674	-0.403336	-0.0465182	199.297	FALSE	1
2022-09-15	12:23:39	0.026985	0.120035	-0.0465182	212.514	FALSE	1
2022-09-15	12:23:39	0.00556005	0.0247322	-0.0465182	199.321	FALSE	1
2022-09-15	12:23:39	0.0162979	0.0724963	-0.0465182	212.587	FALSE	1
2022-09-15	12:23:40	0.0261707	0.116413	-0.018203	199.438	FALSE	1
2022-09-15	12:23:40	-0.00100484	-0.00446973	-0.018203	212.587	FALSE	1
2022-09-15	12:23:40	-0.0374425	-0.166552	-0.018203	199.438	FALSE	1
2022-09-15	12:23:41	-0.0997326	-0.443631	-1.09264	212.587	FALSE	1
2022-09-15	12:23:41	-0.199529	-0.887545	-1.09264	199.438	FALSE	1
2022-09-15	12:23:41	-0.284364	-1.26491	-1.09264	212.587	FALSE	1
2022-09-15	12:23:41	-0.398918	-1.77447	-1.09264	199.438	FALSE	1
2022-09-15	12:23:42	-0.292913	-1.30294	-0.910181	212.587	FALSE	1
2022-09-15	12:23:42	-0.183549	-0.816463	-0.910181	199.438	FALSE	1
2022-09-15	12:23:42	-0.169554	-0.75421	-0.910181	212.587	FALSE	1
2022-09-15	12:23:42	-0.172455	-0.767114	-0.910181	199.438	FALSE	1
2022-09-15	12:23:43	-0.103804	-0.461741	-0.440914	212.587	FALSE	1
2022-09-15	12:23:43	-0.0555086	-0.246913	-0.440914	199.438	FALSE	1
2022-09-15	12:23:43	-0.139478	-0.620426	-0.440914	212.587	FALSE	1
2022-09-15	12:23:43	-0.0976969	-0.434575	-0.440914	199.438	FALSE	1
2022-09-15	12:23:44	0.18785	0.835594	2.05227	213.422	FALSE	1
2022-09-15	12:23:44	0.725153	3.22563	2.05227	202.663	FALSE	1
2022-09-15	12:23:44	0.471107	2.09558	2.05227	215.518	FALSE	1
2022-09-15	12:23:45	-0.058613	-0.260722	-0.27487	202.663	FALSE	1
2022-09-15	12:23:45	-0.155712	-0.692638	-0.27487	215.518	FALSE	1
2022-09-15	12:23:45	-0.0532694	-0.236953	-0.27487	202.663	FALSE	1
2022-09-15	12:23:45	0.0204201	0.0908327	-0.27487	215.609	FALSE	1
2022-09-15	12:23:46	0.156451	0.695925	1.83118	203.359	FALSE	1
2022-09-15	12:23:46	0.285	1.26774	1.83118	216.876	FALSE	1
2022-09-15	12:23:46	0.716145	3.18556	1.83118	206.545	FALSE	1
2022-09-15	12:23:46	0.489071	2.17549	1.83118	219.052	FALSE	1
2022-09-15	12:23:47	0.50841	2.26151	1.93785	208.806	FALSE	1
2022-09-15	12:23:47	0.316298	1.40696	1.93785	220.459	FALSE	1
2022-09-15	12:23:47	0.556348	2.47475	1.93785	211.281	FALSE	1
2022-09-15	12:23:47	0.36154	1.6082	1.93785	222.067	FALSE	1
2022-09-15	12:23:48	0.342659	1.52422	1.95862	212.805	FALSE	1
2022-09-15	12:23:48	0.440674	1.96021	1.95862	224.027	FALSE	1
2022-09-15	12:23:48	0.537621	2.39145	1.95862	215.197	FALSE	1
2022-09-15	12:23:49	1.43192	6.36947	6.58713	230.397	FALSE	1
2022-09-15	12:23:49	1.43538	6.38486	6.58713	221.582	FALSE	1
2022-09-15	12:23:49	2.06724	9.1955	6.58713	239.592	FALSE	1
2022-09-15	12:23:49	0.988868	4.39868	6.58713	225.98	FALSE	1
2022-09-15	12:23:50	0.819555	3.64554	2.19552	243.238	FALSE	1
2022-09-15	12:23:50	0.664949	2.95783	2.19552	228.938	FALSE	1
2022-09-15	12:23:50	0.240522	1.06989	2.19552	244.308	FALSE	1
2022-09-15	12:23:50	0.249275	1.10883	2.19552	230.047	FALSE	1
2022-09-15	12:23:51	0.288003	1.28109	2.71895	245.589	FALSE	1
2022-09-15	12:23:51	0.332176	1.47759	2.71895	231.525	FALSE	1
2022-09-15	12:23:51	0.489886	2.17911	2.71895	247.768	FALSE	1
2022-09-15	12:23:51	1.33492	5.93799	2.71895	237.463	FALSE	1
2022-09-15	12:23:52	3.63945	16.189	13.4627	263.957	1	2
2022-09-15	12:23:52	3.79395	16.8762	13.4627	254.339	1	3
2022-09-15	12:23:52	1.64627	7.32294	13.4627	271.28	FALSE	3
2022-09-15	12:23:53	0.811666	3.61045	2.66173	257.949	FALSE	3
2022-09-15	12:23:53	0.674262	2.99925	2.66173	274.279	FALSE	3
2022-09-15	12:23:53	0.388919	1.72999	2.66173	259.679	FALSE	3
2022-09-15	12:23:53	0.51869	2.30724	2.66173	276.586	FALSE	3
2022-09-15	12:23:54	1.17141	5.21067	1.66026	264.89	FALSE	3
2022-09-15	12:23:54	0.496247	2.20741	1.66026	278.794	FALSE	3
2022-09-15	12:23:54	-0.0650761	-0.289472	1.66026	264.89	FALSE	3
2022-09-15	12:23:54	-0.109605	-0.487545	1.66026	278.794	FALSE	3
2022-09-15	12:23:55	-0.0797325	-0.354666	0.641593	264.89	FALSE	3
2022-09-15	12:23:55	-0.0302669	-0.134633	0.641593	278.794	FALSE	3
2022-09-15	12:23:55	0.255534	1.13667	0.641593	266.027	FALSE	3
2022-09-15	12:23:55	0.431412	1.91901	0.641593	280.713	FALSE	3
2022-09-15	12:23:56	0.242405	1.07827	1.55236	267.105	FALSE	3
2022-09-15	12:23:56	0.42159	1.87532	1.55236	282.588	FALSE	3
2022-09-15	12:23:56	0.382964	1.7035	1.55236	268.808	FALSE	3
2022-09-15	12:23:57	0.449631	2.00005	1.94629	284.588	FALSE	3
2022-09-15	12:23:57	0.479606	2.13338	1.94629	270.942	FALSE	3
2022-09-15	12:23:57	0.385051	1.71278	1.94629	286.301	FALSE	3
2022-09-15	12:23:57	0.435891	1.93893	1.94629	272.881	FALSE	3
2022-09-15	12:23:58	0.427036	1.89954	1.62812	288.2	FALSE	3
2022-09-15	12:23:58	0.380369	1.69196	1.62812	274.573	FALSE	3
2022-09-15	12:23:58	0.290649	1.29286	1.62812	289.493	FALSE	3
2022-09-15	12:23:59	0.323779	1.44023	2.1121	276.013	FALSE	3
2022-09-15	12:23:59	0.355942	1.5833	2.1121	291.077	FALSE	3
2022-09-15	12:23:59	0.555076	2.46909	2.1121	278.482	FALSE	3
2022-09-15	12:23:59	0.668359	2.97299	2.1121	294.05	FALSE	3
2022-09-15	12:23:59	0.470954	2.0949	2.1121	280.577	FALSE	3
2022-09-15	12:24:00	0.727952	3.23808	2.03491	297.288	FALSE	3
2022-09-15	12:24:00	0.347646	1.5464	2.03491	282.123	FALSE	3
2022-09-15	12:24:00	0.296807	1.32026	2.03491	298.608	FALSE	3
2022-09-15	12:24:01	0.266221	1.1842	0.96423	283.308	FALSE	3
2022-09-15	12:24:01	0.217316	0.966665	0.96423	299.575	FALSE	3
2022-09-15	12:24:01	0.202201	0.89943	0.96423	284.207	FALSE	3
2022-09-15	12:24:01	0.181336	0.806619	0.96423	300.381	FALSE	3
2022-09-15	12:24:02	0.147341	0.655402	0.530502	284.862	FALSE	3
2022-09-15	12:24:02	0.118537	0.527276	0.530502	300.908	FALSE	3
2022-09-15	12:24:02	0.102507	0.455972	0.530502	285.318	FALSE	3
2022-09-15	12:24:02	0.108664	0.483359	0.530502	301.392	FALSE	3
2022-09-15	12:24:03	0.107087	0.476344	0.505489	285.795	FALSE	3
2022-09-15	12:24:03	0.101947	0.453481	0.505489	301.845	FALSE	3
2022-09-15	12:24:03	0.114364	0.508714	0.505489	286.303	FALSE	3
2022-09-15	12:24:03	0.131158	0.583417	0.505489	302.429	FALSE	3
2022-09-15	12:24:04	0.136858	0.608772	0.53339	286.912	FALSE	3
2022-09-15	12:24:04	0.115484	0.513696	0.53339	302.942	FALSE	3
2022-09-15	12:24:04	0.107392	0.477701	0.53339	287.39	FALSE	3
2022-09-15	12:24:05	0.139199	0.619185	0.478664	303.562	FALSE	3
2022-09-15	12:24:05	0.175229	0.779454	0.478664	288.169	FALSE	3
2022-09-15	12:24:05	0.0890714	0.396207	0.478664	303.958	FALSE	3
2022-09-15	12:24:05	0.0269341	0.119808	0.478664	288.289	FALSE	3
2022-09-15	12:24:06	0.0991478	0.441029	0.143067	304.399	FALSE	3
2022-09-15	12:24:06	0.120674	0.536782	0.143067	288.826	FALSE	3
2022-09-15	12:24:06	-0.0189183	-0.0841524	0.143067	304.399	FALSE	3
2022-09-15	12:24:06	-0.0722516	-0.32139	0.143067	288.826	FALSE	3
2022-09-15	12:24:07	-0.137035	-0.609559	-0.734064	304.399	FALSE	3
2022-09-15	12:24:07	-0.18818	-0.837062	-0.734064	288.826	FALSE	3
2022-09-15	12:24:07	-0.194542	-0.865362	-0.734064	304.399	FALSE	3
2022-09-15	12:24:07	-0.140343	-0.624274	-0.734064	288.826	FALSE	3
2022-09-15	12:24:08	-0.216883	-0.964739	-0.844308	304.399	FALSE	3
2022-09-15	12:24:08	-0.281412	-1.25178	-0.844308	288.826	FALSE	3
2022-09-15	12:24:08	-0.071132	-0.316409	-0.844308	304.399	FALSE	3
2022-09-15	12:24:09	0.0427611	0.19021	0.595924	289.016	FALSE	3
2022-09-15	12:24:09	-0.183804	-0.817597	0.595924	304.399	FALSE	3
2022-09-15	12:24:09	-0.00619567	-0.0275596	0.595924	289.016	FALSE	3
2022-09-15	12:24:09	0.683117	3.03864	0.595924	307.438	FALSE	3
2022-09-15	12:24:10	1.88357	8.3785	5.39743	297.395	FALSE	3
2022-09-15	12:24:10	1.48968	6.62639	5.39743	314.064	FALSE	3
2022-09-15	12:24:10	1.18317	5.26298	5.39743	302.658	FALSE	3
2022-09-15	12:24:10	0.297163	1.32184	5.39743	315.386	FALSE	3
2022-09-15	12:24:11	0.368155	1.63763	0.326032	304.295	FALSE	3
2022-09-15	12:24:11	0.293295	1.30463	0.326032	316.69	FALSE	3
2022-09-15	12:24:11	-0.0555086	-0.246913	0.326032	304.295	FALSE	3
2022-09-15	12:24:11	-0.31276	-1.39122	0.326032	316.69	FALSE	3
2022-09-15	12:24:12	-0.215356	-0.957947	-0.312109	304.295	FALSE	3
2022-09-15	12:24:12	-0.0295545	-0.131464	-0.312109	316.69	FALSE	3
2022-09-15	12:24:12	0.034415	0.153085	-0.312109	304.448	FALSE	3
2022-09-15	12:24:13	0.144644	0.643405	0.805373	317.334	FALSE	3
2022-09-15	12:24:13	0.14729	0.655175	0.805373	305.103	FALSE	3
2022-09-15	12:24:13	0.169275	0.752969	0.805373	318.087	FALSE	3
2022-09-15	12:24:13	0.263015	1.16994	0.805373	306.273	FALSE	3
2022-09-15	12:24:14	0.115942	0.515733	0.281815	318.602	FALSE	3
2022-09-15	12:24:14	0.021845	0.0971709	0.281815	306.371	FALSE	3
2022-09-15	12:24:14	0.0522776	0.232541	0.281815	318.835	FALSE	3
2022-09-15	12:24:15	0.293448	1.30532	1.85445	307.676	FALSE	3
2022-09-15	12:24:15	0.36673	1.63129	1.85445	320.466	FALSE	3
2022-09-15	12:24:15	0.675127	3.0031	1.85445	310.679	FALSE	3
2022-09-15	12:24:15	0.478639	2.12908	1.85445	322.595	FALSE	3
2022-09-15	12:24:15	0.270547	1.20345	1.85445	311.882	FALSE	3
2022-09-15	12:24:16	0.158944	0.707015	0.394547	323.302	FALSE	3
2022-09-15	12:24:16	0.0909544	0.404583	0.394547	312.287	FALSE	3
2022-09-15	12:24:16	0.0161961	0.0720435	0.394547	323.374	FALSE	3
2022-09-15	12:24:17	-0.0964246	-0.428916	-0.963662	312.287	FALSE	3
2022-09-15	12:24:17	-0.225025	-1.00096	-0.963662	323.374	FALSE	3
2022-09-15	12:24:17	-0.25103	-1.11663	-0.963662	312.287	FALSE	3
2022-09-15	12:24:17	-0.294084	-1.30814	-0.963662	323.374	FALSE	3
2022-09-15	12:24:18	-0.4122	-1.83355	-2.92828	312.287	FALSE	3
2022-09-15	12:24:18	-0.640597	-2.8495	-2.92828	323.374	FALSE	3
2022-09-15	12:24:18	-0.6865	-3.05369	-2.92828	312.287	FALSE	3
2022-09-15	12:24:18	-0.893931	-3.97638	-2.92828	323.374	FALSE	3
2022-09-15	12:24:19	-0.727264	-3.23502	-3.28108	312.287	FALSE	3
2022-09-15	12:24:19	-0.88416	-3.93292	-3.28108	323.374	FALSE	3
2022-09-15	12:24:19	-0.746246	-3.31945	-3.28108	312.287	FALSE	3
2022-09-15	12:24:19	-0.592811	-2.63694	-3.28108	323.374	FALSE	3
2022-09-15	12:24:20	0.163779	0.728522	7.84744	313.016	FALSE	3
2022-09-15	12:24:20	1.90011	8.45207	7.84744	331.827	FALSE	3
2022-09-15	12:24:20	3.22866	14.3617	7.84744	327.377	1	4
2022-09-15	12:24:21	5.36103	23.8469	16.6067	355.673	1	5
2022-09-15	12:24:21	3.77238	16.7803	16.6067	344.158	1	6
2022-09-15	12:24:21	4.38851	19.521	16.6067	375.194	1	7
2022-09-15	12:24:21	1.41151	6.27868	16.6067	350.436	FALSE	7
2022-09-15	12:24:22	0.390649	1.73768	1.73542	376.932	FALSE	7
2022-09-15	12:24:22	0.634974	2.82449	1.73542	353.261	FALSE	7
2022-09-15	12:24:22	0.441998	1.9661	1.73542	378.898	FALSE	7
2022-09-15	12:24:22	0.0929391	0.413412	1.73542	353.674	FALSE	7
2022-09-15	12:24:23	0.496094	2.20673	1.99824	381.105	FALSE	7
2022-09-15	12:24:23	0.0928883	0.413186	1.99824	354.087	FALSE	7
2022-09-15	12:24:23	0.617672	2.74753	1.99824	383.852	FALSE	7
2022-09-15	12:24:23	0.590242	2.62551	1.99824	356.713	FALSE	7
2022-09-15	12:24:24	0.806577	3.58782	2.98695	387.44	FALSE	7
2022-09-15	12:24:24	0.761692	3.38816	2.98695	360.101	FALSE	7
2022-09-15	12:24:24	0.446221	1.98488	2.98695	389.425	FALSE	7
2022-09-15	12:24:25	0.685204	3.04792	2.47815	363.149	FALSE	7
2022-09-15	12:24:25	0.720369	3.20435	2.47815	392.63	FALSE	7
2022-09-15	12:24:25	0.258741	1.15093	2.47815	364.3	FALSE	7
2022-09-15	12:24:25	0.564135	2.50939	2.47815	395.139	FALSE	7
2022-09-15	12:24:26	0.480216	2.1361	1.83112	366.436	FALSE	7
2022-09-15	12:24:26	0.42098	1.8726	1.83112	397.011	FALSE	7
2022-09-15	12:24:26	0.504695	2.24498	1.83112	368.681	FALSE	7
2022-09-15	12:24:26	0.240725	1.07079	1.83112	398.082	FALSE	7
2022-09-15	12:24:27	0.763575	3.39653	2.73423	372.077	FALSE	7
2022-09-15	12:24:27	0.384237	1.70916	2.73423	399.791	FALSE	7
2022-09-15	12:24:27	0.604847	2.69048	2.73423	374.768	FALSE	7
2022-09-15	12:24:27	0.706069	3.14074	2.73423	402.932	FALSE	7
2022-09-15	12:24:28	0.728715	3.24147	2.87497	378.009	FALSE	7
2022-09-15	12:24:28	0.723575	3.21861	2.87497	406.151	FALSE	7
2022-09-15	12:24:28	0.486679	2.16485	2.87497	380.174	FALSE	7
2022-09-15	12:24:29	0.674313	2.99948	2.9361	409.15	FALSE	7
2022-09-15	12:24:29	0.732481	3.25822	2.9361	383.432	FALSE	7
2022-09-15	12:24:29	0.659606	2.93406	2.9361	412.084	FALSE	7
2022-09-15	12:24:29	0.573855	2.55262	2.9361	385.985	FALSE	7
2022-09-15	12:24:30	0.726832	3.23309	3.20169	415.317	FALSE	7
2022-09-15	12:24:30	0.733244	3.26162	3.20169	389.247	FALSE	7
2022-09-15	12:24:30	0.731005	3.25166	3.20169	418.569	FALSE	7
2022-09-15	12:24:30	0.688003	3.06037	3.20169	392.307	FALSE	7
2022-09-15	12:24:31	0.730293	3.24849	3.24209	421.818	FALSE	7
2022-09-15	12:24:31	0.733346	3.26207	3.24209	395.569	FALSE	7
2022-09-15	12:24:31	0.728766	3.2417	3.24209	425.059	FALSE	7
2022-09-15	12:24:31	0.723015	3.21612	3.24209	398.785	FALSE	7
2022-09-15	12:24:32	0.73472	3.26818	3.25973	428.327	FALSE	7
2022-09-15	12:24:32	0.728817	3.24192	3.25973	402.027	FALSE	7
2022-09-15	12:24:32	0.734924	3.26909	3.25973	431.597	FALSE	7
2022-09-15	12:24:33	0.730852	3.25098	3.24854	405.278	FALSE	7
2022-09-15	12:24:33	0.726832	3.23309	3.24854	434.83	FALSE	7
2022-09-15	12:24:33	0.727545	3.23627	3.24854	408.514	FALSE	7
2022-09-15	12:24:33	0.735992	3.27384	3.24854	438.103	FALSE	7
2022-09-15	12:24:34	0.728868	3.24215	3.2387	411.757	FALSE	7
2022-09-15	12:24:34	0.729886	3.24668	3.2387	441.35	FALSE	7
2022-09-15	12:24:34	0.720318	3.20412	3.2387	414.961	FALSE	7
2022-09-15	12:24:34	0.733295	3.26184	3.2387	444.612	FALSE	7
2022-09-15	12:24:35	0.734008	3.26501	3.25149	418.226	FALSE	7
2022-09-15	12:24:35	0.732277	3.25731	3.25149	447.869	FALSE	7
2022-09-15	12:24:35	0.727341	3.23536	3.25149	421.461	FALSE	7
2022-09-15	12:24:35	0.730242	3.24826	3.25149	451.118	FALSE	7
2022-09-15	12:24:36	0.731361	3.25324	3.2549	424.714	FALSE	7
2022-09-15	12:24:36	0.736043	3.27407	3.2549	454.392	FALSE	7
2022-09-15	12:24:36	0.727799	3.2374	3.2549	427.952	FALSE	7
2022-09-15	12:24:37	0.727697	3.23694	3.24	457.629	FALSE	7
2022-09-15	12:24:37	0.730903	3.2512	3.24	431.203	FALSE	7
2022-09-15	12:24:37	0.727748	3.23717	3.24	460.866	FALSE	7
2022-09-15	12:24:37	0.727188	3.23468	3.24	434.438	FALSE	7
2022-09-15	12:24:38	0.734466	3.26705	3.26116	464.133	FALSE	7
2022-09-15	12:24:38	0.734669	3.26795	3.26116	437.706	FALSE	7
2022-09-15	12:24:38	0.731565	3.25415	3.26116	467.387	FALSE	7
2022-09-15	12:24:38	0.73187	3.2555	3.26116	440.961	FALSE	7
2022-09-15	12:24:39	0.733855	3.26433	3.25992	470.651	FALSE	7
2022-09-15	12:24:39	0.729377	3.24441	3.25992	444.205	FALSE	7
2022-09-15	12:24:39	0.73355	3.26298	3.25992	473.914	FALSE	7
2022-09-15	12:24:39	0.734669	3.26795	3.25992	447.473	FALSE	7
2022-09-15	12:24:40	0.736298	3.2752	3.254	477.189	FALSE	7
2022-09-15	12:24:40	0.73014	3.24781	3.254	450.721	FALSE	7
2022-09-15	12:24:40	0.728155	3.23898	3.254	480.428	FALSE	7
2022-09-15	12:24:41	0.728359	3.23989	3.24968	453.961	FALSE	7
2022-09-15	12:24:41	0.72897	3.2426	3.24968	483.671	FALSE	7
2022-09-15	12:24:41	0.733855	3.26433	3.24968	457.225	FALSE	7
2022-09-15	12:24:41	0.731056	3.25188	3.24968	486.923	FALSE	7
2022-09-15	12:24:42	0.736196	3.27475	3.24922	460.5	FALSE	7
2022-09-15	12:24:42	0.732023	3.25618	3.24922	490.179	FALSE	7
2022-09-15	12:24:42	0.730445	3.24917	3.24922	463.749	FALSE	7
2022-09-15	12:24:42	0.723168	3.2168	3.24922	493.396	FALSE	7
2022-09-15	12:24:43	0.73416	3.26569	3.26473	467.015	FALSE	7
2022-09-15	12:24:43	0.736959	3.27814	3.26473	496.674	FALSE	7
2022-09-15	12:24:43	0.735178	3.27022	3.26473	470.285	FALSE	7
2022-09-15	12:24:43	0.729478	3.24486	3.26473	499.919	FALSE	7
2022-09-15	12:24:44	0.729529	3.24509	3.26878	473.53	FALSE	7
2022-09-15	12:24:44	0.735483	3.27158	3.26878	503.19	FALSE	7
2022-09-15	12:24:44	0.739555	3.28969	3.26878	476.82	FALSE	7
2022-09-15	12:24:45	0.738384	3.28448	3.25618	506.475	FALSE	7
2022-09-15	12:24:45	0.725305	3.2263	3.25618	480.046	FALSE	7
2022-09-15	12:24:45	0.732837	3.25981	3.25618	509.735	FALSE	7
2022-09-15	12:24:45	0.731565	3.25415	3.25618	483.301	FALSE	7
2022-09-15	12:24:46	0.737977	3.28267	3.26563	513.017	FALSE	7
2022-09-15	12:24:46	0.734568	3.26751	3.26563	486.568	FALSE	7
2022-09-15	12:24:46	0.732684	3.25912	3.26563	516.277	FALSE	7
2022-09-15	12:24:46	0.731361	3.25324	3.26563	489.821	FALSE	7
2022-09-15	12:24:47	0.734669	3.26795	3.25313	519.545	FALSE	7
2022-09-15	12:24:47	0.729275	3.24396	3.25313	493.065	FALSE	7
2022-09-15	12:24:47	0.731819	3.25528	3.25313	522.8	FALSE	7
2022-09-15	12:24:47	0.72958	3.24532	3.25313	496.311	FALSE	7
2022-09-15	12:24:48	0.738384	3.28448	3.26222	526.084	FALSE	7
2022-09-15	12:24:48	0.727392	3.23559	3.26222	499.546	FALSE	7
2022-09-15	12:24:48	0.734364	3.2666	3.26222	529.351	FALSE	7
2022-09-15	12:24:49	0.729784	3.24623	3.24775	502.792	FALSE	7
2022-09-15	12:24:49	0.731667	3.2546	3.24775	532.605	FALSE	7
2022-09-15	12:24:49	0.727392	3.23559	3.24775	506.028	FALSE	7
2022-09-15	12:24:49	0.731667	3.2546	3.24775	535.86	FALSE	7
2022-09-15	12:24:50	0.734415	3.26682	3.26309	509.295	FALSE	7
2022-09-15	12:24:50	0.731819	3.25528	3.26309	539.115	FALSE	7
2022-09-15	12:24:50	0.734008	3.26501	3.26309	512.56	FALSE	7
2022-09-15	12:24:50	0.734059	3.26524	3.26309	542.381	FALSE	7
2022-09-15	12:24:51	0.731616	3.25437	3.24917	515.814	FALSE	7
2022-09-15	12:24:51	0.727239	3.2349	3.24917	545.616	FALSE	7
2022-09-15	12:24:51	0.731412	3.25347	3.24917	519.068	FALSE	7
2022-09-15	12:24:51	0.731514	3.25392	3.24917	548.869	FALSE	7
2022-09-15	12:24:52	0.731667	3.2546	3.26041	522.322	FALSE	7
2022-09-15	12:24:52	0.732328	3.25754	3.26041	552.127	FALSE	7
2022-09-15	12:24:52	0.734924	3.26909	3.26041	525.591	FALSE	7
2022-09-15	12:24:53	0.734822	3.26864	3.25279	555.396	FALSE	7
2022-09-15	12:24:53	0.732074	3.25641	3.25279	528.848	FALSE	7
2022-09-15	12:24:53	0.727748	3.23717	3.25279	558.633	FALSE	7
2022-09-15	12:24:53	0.730394	3.24894	3.25279	532.097	FALSE	7
2022-09-15	12:24:54	0.728766	3.2417	3.24407	561.874	FALSE	7
2022-09-15	12:24:54	0.730242	3.24826	3.24407	535.345	FALSE	7
2022-09-15	12:24:54	0.730089	3.24758	3.24407	565.122	FALSE	7
2022-09-15	12:24:54	0.728104	3.23875	3.24407	538.584	FALSE	7
2022-09-15	12:24:55	0.726934	3.23355	3.24905	568.356	FALSE	7
2022-09-15	12:24:55	0.732532	3.25845	3.24905	541.842	FALSE	7
2022-09-15	12:24:55	0.73014	3.24781	3.24905	571.603	FALSE	7
2022-09-15	12:24:55	0.732074	3.25641	3.24905	545.099	FALSE	7
2022-09-15	12:24:56	0.734262	3.26614	3.26554	574.87	FALSE	7
2022-09-15	12:24:56	0.737519	3.28063	3.26554	548.379	FALSE	7
2022-09-15	12:24:56	0.730598	3.24985	3.26554	578.119	FALSE	7
2022-09-15	12:24:57	0.734822	3.26864	3.25505	551.648	FALSE	7
2022-09-15	12:24:57	0.729173	3.24351	3.25505	581.363	FALSE	7
2022-09-15	12:24:57	0.732837	3.25981	3.25505	554.908	FALSE	7
2022-09-15	12:24:57	0.730242	3.24826	3.25505	584.611	FALSE	7
2022-09-15	12:24:58	0.732175	3.25686	3.24209	558.164	FALSE	7
2022-09-15	12:24:58	0.727087	3.23423	3.24209	587.845	FALSE	7
2022-09-15	12:24:58	0.731209	3.25256	3.24209	561.417	FALSE	7
2022-09-15	12:24:58	0.724949	3.22472	3.24209	591.07	FALSE	7
2022-09-15	12:24:59	0.731616	3.25437	3.26088	564.671	FALSE	7
2022-09-15	12:24:59	0.735433	3.27135	3.26088	594.341	FALSE	7
2022-09-15	12:24:59	0.73131	3.25301	3.26088	567.924	FALSE	7
2022-09-15	12:24:59	0.733957	3.26479	3.26088	597.606	FALSE	7
2022-09-15	12:25:00	0.729835	3.24645	3.2669	571.171	FALSE	7
2022-09-15	12:25:00	0.736043	3.27407	3.2669	600.88	FALSE	7
2022-09-15	12:25:00	0.737417	3.28018	3.2669	574.451	FALSE	7
2022-09-15	12:25:01	0.735178	3.27022	3.25641	604.151	FALSE	7
2022-09-15	12:25:01	0.728664	3.24124	3.25641	577.692	FALSE	7
2022-09-15	12:25:01	0.732379	3.25777	3.25641	607.408	FALSE	7
2022-09-15	12:25:01	0.732074	3.25641	3.25641	580.949	FALSE	7
2022-09-15	12:25:02	0.741031	3.29625	3.2542	610.705	FALSE	7
2022-09-15	12:25:02	0.727901	3.23785	3.2542	584.187	FALSE	7
2022-09-15	12:25:02	0.729071	3.24305	3.2542	613.948	FALSE	7
2022-09-15	12:25:02	0.728308	3.23966	3.2542	587.426	FALSE	7
2022-09-15	12:25:03	0.728308	3.23966	3.24028	617.187	FALSE	7
2022-09-15	12:25:03	0.72673	3.23264	3.24028	590.659	FALSE	7
2022-09-15	12:25:03	0.728257	3.23943	3.24028	620.427	FALSE	7
2022-09-15	12:25:03	0.730496	3.24939	3.24028	593.908	FALSE	7
2022-09-15	12:25:04	0.736043	3.27407	3.26033	623.701	FALSE	7
2022-09-15	12:25:04	0.73243	3.258	3.26033	597.166	FALSE	7
2022-09-15	12:25:04	0.730394	3.24894	3.26033	626.95	FALSE	7
2022-09-15	12:25:05	0.716349	3.18646	3.23734	600.353	FALSE	7
2022-09-15	12:25:05	0.730751	3.25053	3.23734	630.2	FALSE	7
2022-09-15	12:25:05	0.730089	3.24758	3.23734	603.6	FALSE	7
2022-09-15	12:25:05	0.733957	3.26479	3.23734	633.465	FALSE	7
2022-09-15	12:25:06	0.731412	3.25347	3.25392	606.854	FALSE	7
2022-09-15	12:25:06	0.732634	3.2589	3.25392	636.724	FALSE	7
2022-09-15	12:25:06	0.729987	3.24713	3.25392	610.101	FALSE	7
2022-09-15	12:25:06	0.732023	3.25618	3.25392	639.98	FALSE	7
2022-09-15	12:25:07	0.733346	3.26207	3.2572	613.363	FALSE	7
2022-09-15	12:25:07	0.728562	3.24079	3.2572	643.221	FALSE	7
2022-09-15	12:25:07	0.736552	3.27633	3.2572	616.639	FALSE	7
2022-09-15	12:25:07	0.730547	3.24962	3.2572	646.471	FALSE	7
2022-09-15	12:25:08	0.734618	3.26773	3.26215	619.907	FALSE	7
2022-09-15	12:25:08	0.733448	3.26252	3.26215	649.733	FALSE	7
2022-09-15	12:25:08	0.732023	3.25618	3.26215	623.163	FALSE	7
2022-09-15	12:25:09	0.735534	3.2718	3.26705	653.005	FALSE	7
2022-09-15	12:25:09	0.733397	3.2623	3.26705	626.425	FALSE	7
2022-09-15	12:25:09	0.730903	3.2512	3.26705	656.256	FALSE	7
2022-09-15	12:25:09	0.738028	3.2829	3.26705	629.708	FALSE	7
2022-09-15	12:25:10	0.735789	3.27294	3.27367	659.529	FALSE	7
2022-09-15	12:25:10	0.733499	3.26275	3.27367	632.971	FALSE	7
2022-09-15	12:25:10	0.738079	3.28312	3.27367	662.812	FALSE	7
2022-09-15	12:25:10	0.73645	3.27588	3.27367	636.247	FALSE	7
2022-09-15	12:25:11	0.731717	3.25482	3.26094	666.067	FALSE	7
2022-09-15	12:25:11	0.728715	3.24147	3.26094	639.488	FALSE	7
2022-09-15	12:25:11	0.737214	3.27928	3.26094	669.346	FALSE	7
2022-09-15	12:25:11	0.73472	3.26818	3.26094	642.757	FALSE	7
2022-09-15	12:25:12	0.735483	3.27158	3.27158	672.618	FALSE	7
2022-09-15	12:25:12	0.735229	3.27045	3.27158	646.027	FALSE	7
2022-09-15	12:25:12	0.735738	3.27271	3.27158	675.89	FALSE	7
2022-09-15	12:25:13	0.731259	3.25279	3.2559	649.28	FALSE	7
2022-09-15	12:25:13	0.731565	3.25415	3.2559	679.145	FALSE	7
2022-09-15	12:25:13	0.73187	3.2555	3.2559	652.535	FALSE	7
2022-09-15	12:25:13	0.733142	3.26116	3.2559	682.406	FALSE	7
2022-09-15	12:25:14	0.73874	3.28606	3.2705	655.821	FALSE	7
2022-09-15	12:25:14	0.738588	3.28539	3.2705	685.691	FALSE	7
2022-09-15	12:25:14	0.733041	3.26071	3.2705	659.082	FALSE	7
2022-09-15	12:25:14	0.730598	3.24985	3.2705	688.941	FALSE	7
2022-09-15	12:25:15	0.732837	3.25981	3.21685	662.342	FALSE	7
2022-09-15	12:25:15	0.735585	3.27203	3.21685	692.213	FALSE	7
2022-09-15	12:25:15	0.728613	3.24102	3.21685	665.583	FALSE	7
2022-09-15	12:25:15	0.695687	3.09455	3.21685	695.308	FALSE	7
2022-09-15	12:25:16	0.732735	3.25935	2.95149	668.842	FALSE	7
2022-09-15	12:25:16	0.719249	3.19936	2.95149	698.507	FALSE	7
2022-09-15	12:25:16	0.538588	2.39575	2.95149	671.238	FALSE	7
2022-09-15	12:25:17	0.718333	3.19529	3.25075	701.702	FALSE	7
2022-09-15	12:25:17	0.731768	3.25505	3.25075	674.493	FALSE	7
2022-09-15	12:25:17	0.737722	3.28154	3.25075	704.984	FALSE	7
2022-09-15	12:25:17	0.735382	3.27113	3.25075	677.764	FALSE	7
2022-09-15	12:25:18	0.721743	3.21046	3.1808	708.194	FALSE	7
2022-09-15	12:25:18	0.731565	3.25415	3.1808	681.018	FALSE	7
2022-09-15	12:25:18	0.715992	3.18488	3.1808	711.379	FALSE	7
2022-09-15	12:25:18	0.691005	3.07373	3.1808	684.092	FALSE	7
2022-09-15	12:25:19	0.740929	3.2958	3.27033	714.675	FALSE	7
2022-09-15	12:25:19	0.733346	3.26207	3.27033	687.354	FALSE	7
2022-09-15	12:25:19	0.734211	3.26592	3.27033	717.941	FALSE	7
2022-09-15	12:25:19	0.732328	3.25754	3.27033	690.612	FALSE	7
2022-09-15	12:25:20	0.728562	3.24079	3.25724	721.182	FALSE	7
2022-09-15	12:25:20	0.734211	3.26592	3.25724	693.878	FALSE	7
2022-09-15	12:25:20	0.734008	3.26501	3.25724	724.447	FALSE	7
2022-09-15	12:25:21	0.735789	3.27294	3.27039	697.151	FALSE	7
2022-09-15	12:25:21	0.740064	3.29195	3.27039	727.739	FALSE	7
2022-09-15	12:25:21	0.731158	3.25234	3.27039	700.403	FALSE	7
2022-09-15	12:25:21	0.733855	3.26433	3.27039	731.003	FALSE	7
2022-09-15	12:25:22	0.737468	3.28041	3.26733	703.683	FALSE	7
2022-09-15	12:25:22	0.73701	3.27837	3.26733	734.281	FALSE	7
2022-09-15	12:25:22	0.733906	3.26456	3.26733	706.948	FALSE	7
2022-09-15	12:25:22	0.729733	3.246	3.26733	737.527	FALSE	7
2022-09-15	12:25:23	0.735483	3.27158	3.26631	710.219	FALSE	7
2022-09-15	12:25:23	0.732786	3.25958	3.26631	740.787	FALSE	7
2022-09-15	12:25:23	0.737519	3.28063	3.26631	713.5	FALSE	7
2022-09-15	12:25:23	0.731412	3.25347	3.26631	744.04	FALSE	7
2022-09-15	12:25:24	0.740929	3.2958	3.26509	716.796	FALSE	7
2022-09-15	12:25:24	0.727596	3.23649	3.26509	747.277	FALSE	7
2022-09-15	12:25:24	0.73355	3.26298	3.26509	720.059	FALSE	7
2022-09-15	12:25:25	0.736196	3.27475	3.26694	750.552	FALSE	7
2022-09-15	12:25:25	0.734313	3.26637	3.26694	723.325	FALSE	7
2022-09-15	12:25:25	0.734211	3.26592	3.26694	753.818	FALSE	7
2022-09-15	12:25:25	0.733041	3.26071	3.26694	726.586	FALSE	7
2022-09-15	12:25:26	0.736247	3.27497	3.26043	757.092	FALSE	7
2022-09-15	12:25:26	0.727901	3.23785	3.26043	729.824	FALSE	7
2022-09-15	12:25:26	0.736043	3.27407	3.26043	760.367	FALSE	7
2022-09-15	12:25:26	0.731717	3.25482	3.26043	733.079	FALSE	7
2022-09-15	12:25:27	0.729326	3.24419	3.25483	763.611	FALSE	7
2022-09-15	12:25:27	0.737214	3.27928	3.25483	736.358	FALSE	7
2022-09-15	12:25:27	0.730242	3.24826	3.25483	766.859	FALSE	7
2022-09-15	12:25:27	0.730089	3.24758	3.25483	739.606	FALSE	7
2022-09-15	12:25:28	0.728664	3.24124	3.24917	770.1	FALSE	7
2022-09-15	12:25:28	0.732125	3.25664	3.24917	742.862	FALSE	7
2022-09-15	12:25:28	0.730547	3.24962	3.24917	773.35	FALSE	7
2022-09-15	12:25:29	0.73472	3.26818	3.26416	746.13	FALSE	7
2022-09-15	12:25:29	0.733295	3.26184	3.26416	776.612	FALSE	7
2022-09-15	12:25:29	0.73299	3.26049	3.26416	749.391	FALSE	7
2022-09-15	12:25:29	0.734262	3.26614	3.26416	779.878	FALSE	7
2022-09-15	12:25:30	0.726883	3.23332	3.25658	752.624	FALSE	7
2022-09-15	12:25:30	0.733906	3.26456	3.25658	783.142	FALSE	7
2022-09-15	12:25:30	0.735636	3.27226	3.25658	755.896	FALSE	7
2022-09-15	12:25:30	0.732023	3.25618	3.25658	786.399	FALSE	7
2022-09-15	12:25:31	0.735687	3.27248	3.25573	759.169	FALSE	7
2022-09-15	12:25:31	0.733651	3.26343	3.25573	789.662	FALSE	7
2022-09-15	12:25:31	0.728257	3.23943	3.25573	762.408	FALSE	7
2022-09-15	12:25:31	0.730089	3.24758	3.25573	792.91	FALSE	7
2022-09-15	12:25:32	0.730293	3.24849	4.18522	765.657	FALSE	7
2022-09-15	12:25:32	1.36373	6.06614	4.18522	798.976	FALSE	7
2022-09-15	12:25:32	0.728613	3.24102	4.18522	768.898	FALSE	7
2022-09-15	12:25:33	0.728562	3.24079	3.23547	802.217	FALSE	7
2022-09-15	12:25:33	0.724847	3.22426	3.23547	772.122	FALSE	7
2022-09-15	12:25:33	0.724746	3.22382	3.23547	805.44	FALSE	7
2022-09-15	12:25:33	0.73131	3.25301	3.23547	775.375	FALSE	7
2022-09-15	12:25:34	0.733397	3.2623	3.25137	808.703	FALSE	7
2022-09-15	12:25:34	0.72958	3.24532	3.25137	778.62	FALSE	7
2022-09-15	12:25:34	0.725763	3.22834	3.25137	811.931	FALSE	7
2022-09-15	12:25:34	0.735026	3.26954	3.25137	781.89	FALSE	7
2022-09-15	12:25:35	0.726985	3.23377	3.25126	815.165	FALSE	7
2022-09-15	12:25:35	0.733804	3.26411	3.25126	785.154	FALSE	7
2022-09-15	12:25:35	0.734313	3.26637	3.25126	818.431	FALSE	7
2022-09-15	12:25:35	0.728562	3.24079	3.25126	788.395	FALSE	7
2022-09-15	12:25:36	0.73584	3.27316	3.25656	821.704	FALSE	7
2022-09-15	12:25:36	0.728054	3.23853	3.25656	791.633	FALSE	7
2022-09-15	12:25:36	0.73243	3.258	3.25656	824.962	FALSE	7
2022-09-15	12:25:37	0.725254	3.22607	3.24238	794.859	FALSE	7
2022-09-15	12:25:37	0.729631	3.24554	3.24238	828.208	FALSE	7
2022-09-15	12:25:37	0.72958	3.24532	3.24238	798.105	FALSE	7
2022-09-15	12:25:37	0.731209	3.25256	3.24238	831.46	FALSE	7
2022-09-15	12:25:38	2.19212	9.75099	5.11956	807.856	FALSE	7
2022-09-15	12:25:38	0.736298	3.2752	5.11956	834.736	FALSE	7
2022-09-15	12:25:38	0.729071	3.24305	5.11956	811.099	FALSE	7
2022-09-15	12:25:38	0.946221	4.20898	5.11956	838.945	FALSE	7
2022-09-15	12:25:39	0.901438	4.00978	4.32036	815.109	FALSE	7
2022-09-15	12:25:39	0.731667	3.2546	4.32036	842.199	FALSE	7
2022-09-15	12:25:39	0.740216	3.29263	4.32036	818.401	FALSE	7
2022-09-15	12:25:39	1.51172	6.72443	4.32036	848.924	FALSE	7
2022-09-15	12:25:40	0.730801	3.25075	3.49568	821.652	FALSE	7
2022-09-15	12:25:40	0.730445	3.24917	3.49568	852.173	FALSE	7
2022-09-15	12:25:40	0.896348	3.98714	3.49568	825.639	FALSE	7
2022-09-15	12:25:41	0.736501	3.2761	3.40344	855.449	FALSE	7
2022-09-15	12:25:41	0.727748	3.23717	3.40344	828.876	FALSE	7
2022-09-15	12:25:41	0.73416	3.26569	3.40344	858.715	FALSE	7
2022-09-15	12:25:41	0.862099	3.83479	3.40344	832.711	FALSE	7
2022-09-15	12:25:42	2.32836	10.357	10.5874	869.072	FALSE	7
2022-09-15	12:25:42	2.43085	10.8129	10.5874	843.524	FALSE	7
2022-09-15	12:25:42	2.73828	12.1804	10.5874	881.252	FALSE	7
2022-09-15	12:25:42	2.02312	8.99924	10.5874	852.523	FALSE	7
2022-09-15	12:25:43	3.51284	15.6258	9.00467	896.878	1	8
2022-09-15	12:25:43	1.74144	7.74627	9.00467	860.269	FALSE	8
2022-09-15	12:25:43	1.9764	8.79142	9.00467	905.669	FALSE	8
2022-09-15	12:25:43	0.866679	3.85516	9.00467	864.125	FALSE	8
2022-09-15	12:25:44	0.728919	3.24238	3.26939	908.912	FALSE	8
2022-09-15	12:25:44	0.73757	3.28086	3.26939	867.406	FALSE	8
2022-09-15	12:25:44	0.738486	3.28493	3.26939	912.197	FALSE	8
2022-09-15	12:25:45	0.732583	3.25868	7.1878	870.664	FALSE	8
2022-09-15	12:25:45	0.735891	3.27339	7.1878	915.47	FALSE	8
2022-09-15	12:25:45	4.19507	18.6605	7.1878	889.325	1	9
2022-09-15	12:25:45	0.800013	3.55862	7.1878	919.029	FALSE	9
2022-09-15	12:25:46	1.40775	6.26195	6.28186	895.587	FALSE	9
2022-09-15	12:25:46	1.09996	4.89284	6.28186	923.921	FALSE	9
2022-09-15	12:25:46	1.85197	8.23793	6.28186	903.825	FALSE	9
2022-09-15	12:25:46	1.28922	5.73471	6.28186	929.656	FALSE	9
2022-09-15	12:25:47	1.18581	5.27472	3.79257	909.099	FALSE	9
2022-09-15	12:25:47	0.763931	3.39812	3.79257	933.054	FALSE	9
2022-09-15	12:25:47	0.731717	3.25482	3.79257	912.354	FALSE	9
2022-09-15	12:25:47	0.72897	3.2426	3.79257	936.297	FALSE	9
2022-09-15	12:25:48	0.813041	3.61657	2.91625	915.971	FALSE	9
2022-09-15	12:25:48	0.442252	1.96723	2.91625	938.264	FALSE	9
2022-09-15	12:25:48	0.711514	3.16496	2.91625	919.136	FALSE	9
2022-09-15	12:25:49	0.743982	3.30938	2.6456	941.573	FALSE	9
2022-09-15	12:25:49	0.365407	1.6254	2.6456	920.761	FALSE	9
2022-09-15	12:25:49	0.962201	4.28006	2.6456	945.854	FALSE	9
2022-09-15	12:25:49	0.307443	1.36757	2.6456	922.129	FALSE	9
2022-09-15	12:25:50	0.0234735	0.104415	2.39999	945.958	FALSE	9
2022-09-15	12:25:50	0.664033	2.95375	2.39999	925.082	FALSE	9
2022-09-15	12:25:50	0.73813	3.28335	2.39999	949.241	FALSE	9
2022-09-15	12:25:50	0.732532	3.25845	2.39999	928.341	FALSE	9
2022-09-15	12:25:51	0.729173	3.24351	2.49037	952.485	FALSE	9
2022-09-15	12:25:51	0.712532	3.16948	2.49037	931.51	FALSE	9
2022-09-15	12:25:51	0.608359	2.7061	2.49037	955.191	FALSE	9
2022-09-15	12:25:51	0.189377	0.842387	2.49037	932.353	FALSE	9
2022-09-15	12:25:52	-0.0198344	-0.0882274	-0.177568	955.191	FALSE	9
2022-09-15	12:25:52	-0.107417	-0.477812	-0.177568	932.353	FALSE	9
2022-09-15	12:25:52	0.0074939	0.0333344	-0.177568	955.224	FALSE	9
2022-09-15	12:25:53	-0.113269	-0.503843	0.246804	932.353	FALSE	9
2022-09-15	12:25:53	-0.0533712	-0.237406	0.246804	955.224	FALSE	9
2022-09-15	12:25:53	0.0684099	0.304301	0.246804	932.657	FALSE	9
2022-09-15	12:25:53	0.320166	1.42416	0.246804	956.648	FALSE	9
2022-09-15	12:25:54	0.364491	1.62133	1.39009	934.278	FALSE	9
2022-09-15	12:25:54	0.283779	1.26231	1.39009	957.911	FALSE	9
2022-09-15	12:25:54	0.271718	1.20866	1.39009	935.487	FALSE	9
2022-09-15	12:25:54	0.330038	1.46808	1.39009	959.379	FALSE	9
2022-09-15	12:25:55	0.663779	2.95262	2.55506	938.44	FALSE	9
2022-09-15	12:25:55	0.443321	1.97198	2.55506	961.351	FALSE	9
2022-09-15	12:25:55	0.720165	3.20344	2.55506	941.643	FALSE	9
2022-09-15	12:25:55	0.470344	2.09218	2.55506	963.443	FALSE	9
2022-09-15	12:25:56	0.461285	2.05189	2.04789	943.695	FALSE	9
2022-09-15	12:25:56	0.475992	2.11731	2.04789	965.56	FALSE	9
2022-09-15	12:25:56	0.44388	1.97447	2.04789	945.669	FALSE	9
2022-09-15	12:25:57	0.452227	2.0116	1.96089	967.572	FALSE	9
2022-09-15	12:25:57	0.431769	1.92059	1.96089	947.59	FALSE	9
2022-09-15	12:25:57	0.442048	1.96632	1.96089	969.538	FALSE	9
2022-09-15	12:25:57	0.437265	1.94504	1.96089	949.535	FALSE	9
2022-09-15	12:25:58	0.451056	2.00639	2.02987	971.545	FALSE	9
2022-09-15	12:25:58	0.454669	2.02246	2.02987	951.557	FALSE	9
2022-09-15	12:25:58	0.456654	2.03129	2.02987	973.576	FALSE	9
2022-09-15	12:25:58	0.462965	2.05936	2.02987	953.617	FALSE	9
2022-09-15	12:25:59	0.465458	2.07045	2.05025	975.646	FALSE	9
2022-09-15	12:25:59	0.45645	2.03038	2.05025	955.647	FALSE	9
2022-09-15	12:25:59	0.459657	2.04465	2.05025	977.691	FALSE	9
2022-09-15	12:25:59	0.462099	2.05551	2.05025	957.703	FALSE	9
2022-09-15	12:26:00	0.457417	2.03468	1.98956	979.726	FALSE	9
2022-09-15	12:26:00	0.453346	2.01657	1.98956	959.719	FALSE	9
2022-09-15	12:26:00	0.431056	1.91742	1.98956	981.643	FALSE	9
2022-09-15	12:26:01	0.405814	1.80514	1.764	961.524	FALSE	9
2022-09-15	12:26:01	0.394313	1.75398	1.764	983.397	FALSE	9
2022-09-15	12:26:01	0.394059	1.75285	1.764	963.277	FALSE	9
2022-09-15	12:26:01	0.392074	1.74402	1.764	985.141	FALSE	9
2022-09-15	12:26:02	0.392532	1.74606	1.76044	965.023	FALSE	9
2022-09-15	12:26:02	0.394262	1.75376	1.76044	986.895	FALSE	9
2022-09-15	12:26:02	0.396298	1.76281	1.76044	966.786	FALSE	9
2022-09-15	12:26:02	0.399962	1.77911	1.76044	988.674	FALSE	9
2022-09-15	12:26:03	0.412023	1.83276	1.82031	968.619	FALSE	9
2022-09-15	12:26:03	0.405051	1.80175	1.82031	990.476	FALSE	9
2022-09-15	12:26:03	0.410598	1.82642	1.82031	970.445	FALSE	9
2022-09-15	12:26:04	0.418486	1.86151	1.87685	992.337	FALSE	9
2022-09-15	12:26:04	0.420776	1.8717	1.87685	972.317	FALSE	9
2022-09-15	12:26:04	0.423982	1.88596	1.87685	994.223	FALSE	9
2022-09-15	12:26:04	0.424491	1.88822	1.87685	974.205	FALSE	9
2022-09-15	12:26:05	0.432685	1.92467	1.92987	996.148	FALSE	9
2022-09-15	12:26:05	0.428868	1.90769	1.92987	976.113	FALSE	9
2022-09-15	12:26:05	0.426374	1.8966	1.92987	998.044	FALSE	9
2022-09-15	12:26:05	0.447494	1.99054	1.92987	978.104	FALSE	9
2022-09-15	12:26:06	0.478486	2.1284	1.89315	1000.17	FALSE	9
2022-09-15	12:26:06	0.434211	1.93146	1.89315	980.035	FALSE	9
2022-09-15	12:26:06	0.426171	1.89569	1.89315	1002.07	FALSE	9
2022-09-15	12:26:06	0.363524	1.61703	1.89315	981.652	FALSE	9
2022-09-15	12:26:07	0.380267	1.6915	1.67815	1003.76	FALSE	9
2022-09-15	12:26:07	0.378181	1.68222	1.67815	983.334	FALSE	9
2022-09-15	12:26:07	0.404542	1.79948	1.67815	1005.56	FALSE	9
2022-09-15	12:26:07	0.346069	1.53938	1.67815	984.874	FALSE	9
2022-09-15	12:26:08	0.314466	1.39881	1.40447	1006.96	FALSE	9
2022-09-15	12:26:08	0.310344	1.38047	1.40447	986.254	FALSE	9
2022-09-15	12:26:08	0.322405	1.43412	1.40447	1008.39	FALSE	9
2022-09-15	12:26:09	0.342863	1.52512	1.45206	987.779	FALSE	9
2022-09-15	12:26:09	0.332074	1.47713	1.45206	1009.87	FALSE	9
2022-09-15	12:26:09	0.317824	1.41374	1.45206	989.193	FALSE	9
2022-09-15	12:26:09	0.31299	1.39224	1.45206	1011.26	FALSE	9
2022-09-15	12:26:10	0.291107	1.2949	1.26134	990.488	FALSE	9
2022-09-15	12:26:10	0.281489	1.25212	1.26134	1012.51	FALSE	9
2022-09-15	12:26:10	0.288715	1.28426	1.26134	991.772	FALSE	9
2022-09-15	12:26:10	0.272939	1.21409	1.26134	1013.73	FALSE	9
2022-09-15	12:26:11	0.280064	1.24578	1.25263	993.018	FALSE	9
2022-09-15	12:26:11	0.27757	1.23469	1.25263	1014.96	FALSE	9
2022-09-15	12:26:11	0.28215	1.25506	1.25263	994.273	FALSE	9
2022-09-15	12:26:11	0.286628	1.27498	1.25263	1016.24	FALSE	9
2022-09-15	12:26:12	0.285611	1.27045	1.29958	995.543	FALSE	9
2022-09-15	12:26:12	0.290802	1.29355	1.29958	1017.53	FALSE	9
2022-09-15	12:26:12	0.300064	1.33474	1.29958	996.878	FALSE	9
2022-09-15	12:26:13	0.328664	1.46196	1.73785	1018.99	FALSE	9
2022-09-15	12:26:13	0.416349	1.852	1.73785	998.73	FALSE	9
2022-09-15	12:26:13	0.434313	1.93191	1.73785	1020.93	FALSE	9
2022-09-15	12:26:13	0.383422	1.70554	1.73785	1000.44	FALSE	9
2022-09-15	12:26:14	0.184237	0.819523	-0.122126	1021.74	FALSE	9
2022-09-15	12:26:14	-0.002786	-0.0123927	-0.122126	1000.44	FALSE	9
2022-09-15	12:26:14	-0.192964	-0.858342	-0.122126	1021.74	FALSE	9
2022-09-15	12:26:14	-0.0983076	-0.437292	-0.122126	1000.44	FALSE	9
2022-09-15	12:26:15	-0.182888	-0.813522	-2.02285	1021.74	FALSE	9
2022-09-15	12:26:15	-0.224109	-0.996882	-2.02285	1000.44	FALSE	9
2022-09-15	12:26:15	-0.938816	-4.17604	-2.02285	1021.74	FALSE	9
2022-09-15	12:26:15	-0.473218	-2.10497	-2.02285	1000.44	FALSE	9
2022-09-15	12:26:16	-0.544872	-2.4237	-4.1737	1021.74	FALSE	9
2022-09-15	12:26:16	-0.93047	-4.13892	-4.1737	1000.44	FALSE	9
2022-09-15	12:26:16	-1.33953	-5.9585	-4.1737	1021.74	FALSE	9
2022-09-15	12:26:17	-1.14472	-5.09194	-5.27156	1000.44	FALSE	9
2022-09-15	12:26:17	-1.23469	-5.49215	-5.27156	1021.74	FALSE	9
2022-09-15	12:26:17	-1.06452	-4.7352	-5.27156	1000.44	FALSE	9
2022-09-15	12:26:17	-1.29647	-5.76696	-5.27156	1021.74	FALSE	9
2022-09-15	12:26:18	-1.26009	-5.60513	-3.67293	1000.44	FALSE	9
2022-09-15	12:26:18	-0.749961	-3.33598	-3.67293	1021.74	FALSE	9
2022-09-15	12:26:18	-0.700852	-3.11753	-3.67293	1000.44	FALSE	9
2022-09-15	12:26:18	-0.591946	-2.63309	-3.67293	1021.74	FALSE	9
2022-09-15	12:26:19	-0.633015	-2.81578	-2.03146	1000.44	FALSE	9
2022-09-15	12:26:19	-0.503193	-2.2383	-2.03146	1021.74	FALSE	9
2022-09-15	12:26:19	-0.357798	-1.59156	-2.03146	1000.44	FALSE	9
2022-09-15	12:26:19	-0.33276	-1.48018	-2.03146	1021.74	FALSE	9
2022-09-15	12:26:20	-0.0280786	-0.124899	0.358253	1000.44	FALSE	9
2022-09-15	12:26:20	-0.0772898	-0.3438	0.358253	1021.74	FALSE	9
2022-09-15	12:26:20	0.346985	1.54346	0.358253	1001.98	FALSE	9
2022-09-15	12:26:21	0.21925	0.975268	2.1091	1022.72	FALSE	9
2022-09-15	12:26:21	0.606832	2.69931	2.1091	1004.68	FALSE	9
2022-09-15	12:26:21	0.576196	2.56304	2.1091	1025.28	FALSE	9
2022-09-15	12:26:21	0.494313	2.1988	2.1091	1006.88	FALSE	9
2022-09-15	12:26:22	0.510343	2.27011	8.23375	1027.55	FALSE	9
2022-09-15	12:26:22	0.516399	2.29705	8.23375	1009.17	FALSE	9
2022-09-15	12:26:22	0.796501	3.543	8.23375	1031.1	FALSE	9
2022-09-15	12:26:22	5.58088	24.8249	8.23375	1034	1	10
2022-09-15	12:26:23	1.24184	5.52395	4.33099	1036.62	FALSE	10
2022-09-15	12:26:23	1.4594	6.4917	4.33099	1040.49	FALSE	10
2022-09-15	12:26:23	0.885254	3.93779	4.33099	1040.56	FALSE	10
2022-09-15	12:26:23	0.308104	1.37051	4.33099	1041.86	FALSE	10
2022-09-15	12:26:24	0.19014	0.845781	1.42627	1041.4	FALSE	10
2022-09-15	12:26:24	0.379351	1.68743	1.42627	1043.55	FALSE	10
2022-09-15	12:26:24	0.39243	1.74561	1.42627	1043.15	FALSE	10
2022-09-15	12:26:25	1.36184	6.05774	12.2246	1049.61	FALSE	10
2022-09-15	12:26:25	4.30663	19.1568	12.2246	1062.31	1	11
2022-09-15	12:26:25	4.36678	19.4243	12.2246	1069.03	1	12
2022-09-15	12:26:25	0.957621	4.25969	12.2246	1066.57	FALSE	12
2022-09-15	12:26:26	0.22444	0.998354	1.16344	1070.03	FALSE	12
2022-09-15	12:26:26	0.298181	1.32637	1.16344	1067.89	FALSE	12
2022-09-15	12:26:26	0.326527	1.45246	1.16344	1071.48	FALSE	12
2022-09-15	12:26:26	0.197061	0.876567	1.16344	1068.77	FALSE	12
2022-09-15	12:26:27	0.249631	1.11041	0.615336	1072.59	FALSE	12
2022-09-15	12:26:27	0.00983486	0.0437474	0.615336	1068.81	FALSE	12
2022-09-15	12:26:27	0.155535	0.691851	0.615336	1073.28	FALSE	12
2022-09-15	12:26:28	-0.0853814	-0.379794	1.05687	1068.81	FALSE	12
2022-09-15	12:26:28	0.213804	0.951043	1.05687	1074.23	FALSE	12
2022-09-15	12:26:28	0.220267	0.979792	1.05687	1069.79	FALSE	12
2022-09-15	12:26:28	0.601692	2.67645	1.05687	1076.91	FALSE	12
2022-09-15	12:26:29	0.594466	2.6443	17.8941	1072.44	FALSE	12
2022-09-15	12:26:29	0.705407	3.13779	17.8941	1080.05	FALSE	12
2022-09-15	12:26:29	6.41848	28.5507	17.8941	1100.99	1	13
2022-09-15	12:26:29	8.37273	37.2436	17.8941	1117.29	1	14
2022-09-15	12:26:30	3.32739	14.8009	7.00331	1115.79	1	15
2022-09-15	12:26:30	1.50866	6.71082	7.00331	1124	FALSE	15
2022-09-15	12:26:30	0.512176	2.27826	7.00331	1118.07	FALSE	15
2022-09-15	12:26:30	0.949428	4.22325	7.00331	1128.23	FALSE	15
2022-09-15	12:26:31	1.41788	6.30701	13.4997	1124.37	FALSE	15
2022-09-15	12:26:31	2.31518	10.2984	13.4997	1138.53	FALSE	15
2022-09-15	12:26:31	5.65441	25.1519	13.4997	1149.53	1	16
2022-09-15	12:26:31	2.75197	12.2413	13.4997	1150.77	FALSE	16
2022-09-15	12:26:32	1.61798	7.1971	4.49927	1156.72	FALSE	16
2022-09-15	12:26:32	0.667697	2.97005	4.49927	1153.74	FALSE	16
2022-09-15	12:26:32	0.748766	3.33066	4.49927	1160.05	FALSE	16
2022-09-15	12:26:33	0.648104	2.8829	2.42851	1156.62	FALSE	16
2022-09-15	12:26:33	0.491361	2.18567	2.42851	1162.24	FALSE	16
2022-09-15	12:26:33	0.584847	2.60152	2.42851	1159.22	FALSE	16
2022-09-15	12:26:33	0.459504	2.04397	2.42851	1164.28	FALSE	16
2022-09-15	12:26:34	0.61701	2.74458	2.26315	1161.97	FALSE	16
2022-09-15	12:26:34	0.408512	1.81714	2.26315	1166.1	FALSE	16
2022-09-15	12:26:34	0.621743	2.76564	2.26315	1164.73	FALSE	16
2022-09-15	12:26:34	0.38785	1.72523	2.26315	1167.82	FALSE	16
2022-09-15	12:26:35	0.665051	2.95828	2.1679	1167.69	FALSE	16
2022-09-15	12:26:35	0.352226	1.56677	2.1679	1169.39	FALSE	16
2022-09-15	12:26:35	0.554975	2.46864	2.1679	1170.16	FALSE	16
2022-09-15	12:26:35	0.377214	1.67792	2.1679	1171.07	FALSE	16
2022-09-15	12:26:36	0.580318	2.58137	2.38428	1172.74	FALSE	16
2022-09-15	12:26:36	0.473499	2.10622	2.38428	1173.18	FALSE	16
2022-09-15	12:26:36	0.554211	2.46524	2.38428	1175.2	FALSE	16
2022-09-15	12:26:37	0.490293	2.18092	2.25687	1175.36	FALSE	16
2022-09-15	12:26:37	0.534924	2.37945	2.25687	1177.58	FALSE	16
2022-09-15	12:26:37	0.48612	2.16236	2.25687	1177.52	FALSE	16
2022-09-15	12:26:37	0.51813	2.30475	2.25687	1179.89	FALSE	16
2022-09-15	12:26:38	0.540063	2.40231	2.31221	1179.92	FALSE	16
2022-09-15	12:26:38	0.476501	2.11957	2.31221	1182.01	FALSE	16
2022-09-15	12:26:38	0.51472	2.28958	2.31221	1182.21	FALSE	16
2022-09-15	12:26:38	0.547952	2.4374	2.31221	1184.45	FALSE	16
2022-09-15	12:26:39	0.55355	2.4623	2.2932	1184.67	FALSE	16
2022-09-15	12:26:39	0.488359	2.17232	2.2932	1186.62	FALSE	16
2022-09-15	12:26:39	0.505509	2.24861	2.2932	1186.92	FALSE	16
2022-09-15	12:26:39	0.51472	2.28958	2.2932	1188.91	FALSE	16
2022-09-15	12:26:40	0.547086	2.43355	2.33591	1189.36	FALSE	16
2022-09-15	12:26:40	0.524644	2.33372	2.33591	1191.24	FALSE	16
2022-09-15	12:26:40	0.503677	2.24046	2.33591	1191.6	FALSE	16
2022-09-15	12:26:41	0.503219	2.23842	2.30441	1193.48	FALSE	16
2022-09-15	12:26:41	0.555382	2.47045	2.30441	1194.07	FALSE	16
2022-09-15	12:26:41	0.482405	2.14583	2.30441	1195.63	FALSE	16
2022-09-15	12:26:41	0.531209	2.36292	2.30441	1196.43	FALSE	16
2022-09-15	12:26:42	0.514517	2.28867	2.32371	1197.91	FALSE	16
2022-09-15	12:26:42	0.561336	2.49693	2.32371	1198.93	FALSE	16
2022-09-15	12:26:42	0.517723	2.30294	2.32371	1200.22	FALSE	16
2022-09-15	12:26:42	0.495993	2.20628	2.32371	1201.13	FALSE	16
2022-09-15	12:26:43	0.505713	2.24951	2.29586	1202.47	FALSE	16
2022-09-15	12:26:43	0.53528	2.38103	2.29586	1203.51	FALSE	16
2022-09-15	12:26:43	0.504491	2.24408	2.29586	1204.71	FALSE	16
2022-09-15	12:26:43	0.519046	2.30882	2.29586	1205.82	FALSE	16
2022-09-15	12:26:44	0.500063	2.22438	2.21872	1206.94	FALSE	16
2022-09-15	12:26:44	0.608206	2.70542	2.21872	1208.53	FALSE	16
2022-09-15	12:26:44	0.388104	1.72636	2.21872	1208.66	FALSE	16
2022-09-15	12:26:45	0.550954	2.45075	2.19043	1210.98	FALSE	16
2022-09-15	12:26:45	0.403677	1.79564	2.19043	1210.46	FALSE	16
2022-09-15	12:26:45	0.592837	2.63706	2.19043	1213.62	FALSE	16
2022-09-15	12:26:45	0.422252	1.87826	2.19043	1212.34	FALSE	16
2022-09-15	12:26:46	0.511667	2.276	2.38556	1215.89	FALSE	16
2022-09-15	12:26:46	0.459453	2.04374	2.38556	1214.38	FALSE	16
2022-09-15	12:26:46	0.629885	2.80185	2.38556	1218.69	FALSE	16
2022-09-15	12:26:46	0.544186	2.42065	2.38556	1216.8	FALSE	16
2022-09-15	12:26:47	0.346272	1.54029	0.329711	1220.23	FALSE	16
2022-09-15	12:26:47	0.124797	0.555122	0.329711	1217.36	FALSE	16
2022-09-15	12:26:47	-0.186552	-0.829821	0.329711	1220.23	FALSE	16
2022-09-15	12:26:47	0.0119723	0.0532552	0.329711	1217.41	FALSE	16
2022-09-15	12:26:48	-0.0994781	-0.442498	-0.255817	1220.23	FALSE	16
2022-09-15	12:26:48	0.0794022	0.353197	-0.255817	1217.76	FALSE	16
2022-09-15	12:26:48	-0.152455	-0.67815	-0.255817	1220.23	FALSE	16
2022-09-15	12:26:49	-0.0899106	-0.39994	-1.061	1217.76	FALSE	16
2022-09-15	12:26:49	-0.222328	-0.988959	-1.061	1220.23	FALSE	16
2022-09-15	12:26:49	-0.224364	-0.998016	-1.061	1217.76	FALSE	16
2022-09-15	12:26:49	-0.417493	-1.85709	-1.061	1220.23	FALSE	16
2022-09-15	12:26:50	-0.357493	-1.5902	-1.44459	1217.76	FALSE	16
2022-09-15	12:26:50	-0.350877	-1.56077	-1.44459	1220.23	FALSE	16
2022-09-15	12:26:50	-0.288638	-1.28392	-1.44459	1217.76	FALSE	16
2022-09-15	12:26:50	-0.302023	-1.34346	-1.44459	1220.23	FALSE	16
2022-09-15	12:26:51	-0.167773	-0.746288	-0.998522	1217.76	FALSE	16
2022-09-15	12:26:51	-0.204007	-0.907464	-0.998522	1220.23	FALSE	16
2022-09-15	12:26:51	-0.225839	-1.00458	-0.998522	1217.76	FALSE	16
2022-09-15	12:26:51	-0.300292	-1.33576	-0.998522	1220.23	FALSE	16
2022-09-15	12:26:52	-0.149656	-0.6657	-0.767114	1217.76	FALSE	16
2022-09-15	12:26:52	-0.211081	-0.938931	-0.767114	1220.23	FALSE	16
2022-09-15	12:26:52	-0.156628	-0.696713	-0.767114	1217.76	FALSE	16
2022-09-15	12:26:53	-0.217392	-0.967003	-0.557212	1220.23	FALSE	16
2022-09-15	12:26:53	-0.111539	-0.496148	-0.557212	1217.76	FALSE	16
2022-09-15	12:26:53	-0.129503	-0.576055	-0.557212	1220.23	FALSE	16
2022-09-15	12:26:53	-0.0426333	-0.189641	-0.557212	1217.76	FALSE	16
2022-09-15	12:26:54	-0.147163	-0.65461	-0.256761	1220.23	FALSE	16
2022-09-15	12:26:54	-0.0571371	-0.254157	-0.256761	1217.76	FALSE	16
2022-09-15	12:26:54	-0.135356	-0.602091	-0.256761	1220.23	FALSE	16
2022-09-15	12:26:54	0.108766	0.483813	-0.256761	1218.25	FALSE	16
2022-09-15	12:26:55	-0.0723534	-0.321842	0.103623	1220.23	FALSE	16
2022-09-15	12:26:55	0.182354	0.811147	0.103623	1219.06	FALSE	16
2022-09-15	12:26:55	-0.055356	-0.246235	0.103623	1220.23	FALSE	16
2022-09-15	12:26:55	0.0385371	0.171421	0.103623	1219.23	FALSE	16
2022-09-15	12:26:56	0.033957	0.151048	0.209904	1220.38	FALSE	16
2022-09-15	12:26:56	0.0138552	0.0616307	0.209904	1219.29	FALSE	16
2022-09-15	12:26:56	0.0937534	0.417034	0.209904	1220.8	FALSE	16
2022-09-15	12:26:57	0.0810307	0.360441	0.453253	1219.65	FALSE	16
2022-09-15	12:26:57	0.11528	0.512788	0.453253	1221.31	FALSE	16
2022-09-15	12:26:57	0.0428628	0.190662	0.453253	1219.84	FALSE	16
2022-09-15	12:26:57	0.16841	0.749121	0.453253	1222.06	FALSE	16
2022-09-15	12:26:58	0.0706491	0.314261	-0.186246	1220.15	FALSE	16
2022-09-15	12:26:58	0.0438806	0.19519	-0.186246	1222.26	FALSE	16
2022-09-15	12:26:58	-0.145178	-0.645781	-0.186246	1220.15	FALSE	16
2022-09-15	12:26:58	-0.136832	-0.608656	-0.186246	1222.26	FALSE	16
2022-09-15	12:26:59	-0.157493	-0.70056	2.99841	1220.15	FALSE	16
2022-09-15	12:26:59	0.663422	2.95103	2.99841	1225.21	FALSE	16
2022-09-15	12:26:59	1.642	7.30394	2.99841	1227.46	FALSE	16
2022-09-15	12:26:59	0.548359	2.43921	2.99841	1227.65	FALSE	16
2022-09-15	12:27:00	0.365814	1.62721	1.4966	1229.09	FALSE	16
2022-09-15	12:27:00	0.534008	2.37537	1.4966	1230.02	FALSE	16
2022-09-15	12:27:00	0.109529	0.487207	1.4966	1229.57	FALSE	16
2022-09-15	12:27:01	0.4707	2.09377	3.68884	1232.12	FALSE	16
2022-09-15	12:27:01	0.751107	3.34107	3.68884	1232.91	FALSE	16
2022-09-15	12:27:01	2.02032	8.98679	3.68884	1241.11	FALSE	16
2022-09-15	12:27:01	0.0750257	0.333729	3.68884	1233.25	FALSE	16
2022-09-15	12:27:02	-0.0151524	-0.0674009	-0.559759	1241.11	FALSE	16
2022-09-15	12:27:02	-0.108689	-0.48347	-0.559759	1233.25	FALSE	16
2022-09-15	12:27:02	-0.123804	-0.550705	-0.559759	1241.11	FALSE	16
2022-09-15	12:27:02	-0.255712	-1.13746	-0.559759	1233.25	FALSE	16
2022-09-15	12:27:03	-0.0623789	-0.277474	-0.601299	1241.11	FALSE	16
2022-09-15	12:27:03	-0.116476	-0.518109	-0.601299	1233.25	FALSE	16
2022-09-15	12:27:03	-0.121208	-0.539157	-0.601299	1241.11	FALSE	16
2022-09-15	12:27:03	-0.240649	-1.07045	-0.601299	1233.25	FALSE	16
2022-09-15	12:27:04	-0.102328	-0.455175	-0.500827	1241.11	FALSE	16
2022-09-15	12:27:04	-0.147519	-0.656194	-0.500827	1233.25	FALSE	16
2022-09-15	12:27:04	-0.0879259	-0.391112	-0.500827	1241.11	FALSE	16
2022-09-15	12:27:05	-0.144364	-0.64216	0.0427847	1233.25	FALSE	16
2022-09-15	12:27:05	0.0208781	0.09287	0.0427847	1241.2	FALSE	16
2022-09-15	12:27:05	0.0597076	0.265591	0.0427847	1233.51	FALSE	16
2022-09-15	12:27:05	0.102252	0.454837	0.0427847	1241.65	FALSE	16
2022-09-15	12:27:06	0.193295	0.859815	1.01041	1234.37	FALSE	16
2022-09-15	12:27:06	0.126222	0.561461	1.01041	1242.21	FALSE	16
2022-09-15	12:27:06	0.293143	1.30396	1.01041	1235.68	FALSE	16
2022-09-15	12:27:06	0.295942	1.31641	1.01041	1243.53	FALSE	16
2022-09-15	12:27:07	0.696654	3.09886	4.90519	1238.78	FALSE	16
2022-09-15	12:27:07	1.18093	5.25301	4.90519	1248.78	FALSE	16
2022-09-15	12:27:07	1.71431	7.62559	4.90519	1246.4	FALSE	16
2022-09-15	12:27:07	0.819046	3.64328	4.90519	1252.43	FALSE	16
2022-09-15	12:27:08	0.729478	3.24486	2.23744	1249.65	FALSE	16
2022-09-15	12:27:08	0.294262	1.30894	2.23744	1253.74	FALSE	16
2022-09-15	12:27:08	0.485255	2.15851	2.23744	1251.81	FALSE	16
2022-09-15	12:27:09	0.473652	2.1069	4.58114	1255.84	FALSE	16
2022-09-15	12:27:09	0.503371	2.23909	4.58114	1254.04	FALSE	16
2022-09-15	12:27:09	1.10439	4.91255	4.58114	1260.76	FALSE	16
2022-09-15	12:27:09	2.03813	9.06601	4.58114	1263.11	FALSE	16
2022-09-15	12:27:10	1.63859	7.28878	7.14956	1268.04	FALSE	16
2022-09-15	12:27:10	1.25752	5.5937	7.14956	1268.7	FALSE	16
2022-09-15	12:27:10	1.78826	7.95454	7.14956	1276	FALSE	16
2022-09-15	12:27:10	1.7448	7.76122	7.14956	1276.47	FALSE	16
2022-09-15	12:27:11	1.52902	6.80139	10.1125	1282.8	FALSE	16
2022-09-15	12:27:11	3.23569	14.393	10.1125	1290.86	1	17
2022-09-15	12:27:11	2.62708	11.6858	10.1125	1294.49	FALSE	17
2022-09-15	12:27:11	1.70174	7.56968	10.1125	1298.43	FALSE	17
2022-09-15	12:27:12	0.656552	2.92047	4.46682	1297.41	FALSE	17
2022-09-15	12:27:12	0.934924	4.15873	4.46682	1302.59	FALSE	17
2022-09-15	12:27:12	1.42108	6.32125	4.46682	1303.73	FALSE	17
2022-09-15	12:27:13	2.20683	9.81642	15.4068	1312.4	FALSE	17
2022-09-15	12:27:13	3.49681	15.5545	15.4068	1319.28	1	18
2022-09-15	12:27:13	3.16719	14.0883	15.4068	1326.49	1	19
2022-09-15	12:27:13	4.98362	22.1681	15.4068	1341.45	1	20
2022-09-15	12:27:14	3.69075	16.4172	19.5004	1342.91	1	21
2022-09-15	12:27:14	4.74658	21.1137	19.5004	1362.56	1	22
2022-09-15	12:27:14	3.58826	15.9613	19.5004	1358.87	1	23
2022-09-15	12:27:14	5.50993	24.5093	19.5004	1387.07	1	24
2022-09-15	12:27:15	1.76378	7.84565	12.4497	1366.72	FALSE	24
2022-09-15	12:27:15	3.13955	13.9653	12.4497	1401.04	1	25
2022-09-15	12:27:15	3.03838	13.5153	12.4497	1380.23	1	26
2022-09-15	12:27:15	3.25355	14.4724	12.4497	1415.51	1	27
2022-09-15	12:27:16	2.54887	11.3379	14.2258	1391.57	FALSE	27
2022-09-15	12:27:16	3.39645	15.1081	14.2258	1430.62	1	28
2022-09-15	12:27:16	3.64897	16.2313	14.2258	1407.8	1	29
2022-09-15	12:27:17	2.96118	13.1719	13.594	1443.79	FALSE	29
2022-09-15	12:27:17	1.85141	8.23544	13.594	1416.04	FALSE	29
2022-09-15	12:27:17	2.76332	12.2918	13.594	1456.08	FALSE	29
2022-09-15	12:27:17	4.64836	20.6768	13.594	1436.71	1	30
2022-09-15	12:27:18	6.2854	27.9587	29.1868	1484.04	1	31
2022-09-15	12:27:18	6.77166	30.1217	29.1868	1466.83	1	32
2022-09-15	12:27:18	6.35752	28.2795	29.1868	1512.32	1	33
2022-09-15	12:27:18	6.83136	30.3873	29.1868	1497.22	1	34
2022-09-15	12:27:19	6.35991	28.2902	12.2705	1540.61	1	35
2022-09-15	12:27:19	2.00775	8.93087	12.2705	1506.15	FALSE	35
2022-09-15	12:27:19	1.90653	8.48063	12.2705	1549.09	FALSE	35
2022-09-15	12:27:19	0.759962	3.38046	12.2705	1509.53	FALSE	35
2022-09-15	12:27:20	1.19752	5.32681	9.31631	1554.42	FALSE	35
2022-09-15	12:27:20	2.19966	9.78453	9.31631	1519.32	FALSE	35
2022-09-15	12:27:20	2.88602	12.8376	9.31631	1567.26	FALSE	35
2022-09-15	12:27:21	1.08561	4.82901	5.53976	1524.15	FALSE	35
2022-09-15	12:27:21	1.0595	4.71287	5.53976	1571.97	FALSE	35
2022-09-15	12:27:21	1.86373	8.29024	5.53976	1532.44	FALSE	35
2022-09-15	12:27:21	0.972735	4.32692	5.53976	1576.3	FALSE	35
2022-09-15	12:27:22	0.737265	3.2795	4.43309	1535.72	FALSE	35
2022-09-15	12:27:22	0.73299	3.26049	4.43309	1579.56	FALSE	35
2022-09-15	12:27:22	1.67523	7.45176	4.43309	1543.17	FALSE	35
2022-09-15	12:27:22	0.840929	3.74062	4.43309	1583.3	FALSE	35
2022-09-15	12:27:23	3.7764	16.7982	24.546	1559.97	1	36
2022-09-15	12:27:23	3.15207	14.021	24.546	1597.32	1	37
2022-09-15	12:27:23	5.54342	24.6582	24.546	1584.62	1	38
2022-09-15	12:27:23	9.60082	42.7064	24.546	1640.02	1	39
2022-09-15	12:27:24	8.51945	37.8962	25.4817	1622.52	1	40
2022-09-15	12:27:24	2.85212	12.6868	25.4817	1652.71	FALSE	40
2022-09-15	12:27:24	5.81405	25.8621	25.4817	1648.38	1	41
2022-09-15	12:27:25	9.49029	42.2147	27.8806	1694.93	1	42
2022-09-15	12:27:25	7.68143	34.1685	27.8806	1682.55	1	43
2022-09-15	12:27:25	3.55553	15.8157	27.8806	1710.74	1	44
2022-09-15	12:27:25	4.34408	19.3233	27.8806	1701.87	1	45
2022-09-15	12:27:26	3.42077	15.2163	14.9766	1725.96	1	46
2022-09-15	12:27:26	5.02316	22.344	14.9766	1724.22	1	47
2022-09-15	12:27:26	2.47462	11.0076	14.9766	1736.97	FALSE	47
2022-09-15	12:27:26	2.54902	11.3386	14.9766	1735.56	FALSE	47
2022-09-15	12:27:27	1.69849	7.55522	18.2846	1744.52	FALSE	47
2022-09-15	12:27:27	4.09823	18.2297	18.2846	1753.79	1	48
2022-09-15	12:27:27	6.73945	29.9784	18.2846	1774.5	1	49
2022-09-15	12:27:27	3.90612	17.3752	18.2846	1771.16	1	50
2022-09-15	12:27:28	2.55492	11.3648	9.22626	1785.86	FALSE	50
2022-09-15	12:27:28	2.00525	8.91975	9.22626	1780.08	FALSE	50
2022-09-15	12:27:28	1.6623	7.39424	9.22626	1793.26	FALSE	50
2022-09-15	12:27:29	1.00296	4.46137	3.96608	1784.54	FALSE	50
2022-09-15	12:27:29	1.50088	6.67621	3.96608	1799.93	FALSE	50
2022-09-15	12:27:29	0.830038	3.69218	3.96608	1788.24	FALSE	50
2022-09-15	12:27:29	0.232583	1.03458	3.96608	1800.97	FALSE	50
2022-09-15	12:27:30	0.376807	1.67611	3.98894	1789.91	FALSE	50
2022-09-15	12:27:30	0.816094	3.63015	3.98894	1804.6	FALSE	50
2022-09-15	12:27:30	0.926578	4.1216	3.98894	1794.03	FALSE	50
2022-09-15	12:27:30	1.46754	6.52791	3.98894	1811.13	FALSE	50

## Sheet: Tyr_prong_2022915122222 (3)
Date	Time	Lbs	Newtons	Total force x time		Total steps > 13.345	**GoPro Fitting: 1211
2022-09-15	12:22:30	0.980471	4.36133	4.36133	FALSE	0
2022-09-15	12:22:30	0.987239	4.39144	4.39144	FALSE	0
2022-09-15	12:22:30	1.00846	4.48583	8.84716	FALSE	0
2022-09-15	12:22:30	1.01823	4.52929	8.92073	FALSE	0
2022-09-15	12:22:31	1.025	4.5594	13.4066	FALSE	0
2022-09-15	12:22:31	1.01263	4.50438	13.4251	FALSE	0
2022-09-15	12:22:31	1.04485	4.6477	18.0543	FALSE	0
2022-09-15	12:22:31	1.03864	4.62008	18.0452	FALSE	0
2022-09-15	12:22:32	1.06922	4.7561	22.8104	FALSE	0
2022-09-15	12:22:32	1.08475	4.82518	22.8704	FALSE	0
2022-09-15	12:22:32	1.16872	5.1987	28.0091	FALSE	0
2022-09-15	12:22:32	1.15955	5.15791	28.0283	FALSE	0
2022-09-15	12:22:33	1.16505	5.18238	33.1914	FALSE	0
2022-09-15	12:22:33	1.16169	5.16743	33.1957	FALSE	0
2022-09-15	12:22:33	1.18754	5.28242	38.4739	FALSE	0
2022-09-15	12:22:34	1.21869	5.42098	38.6167	FALSE	0
2022-09-15	12:22:34	1.23803	5.50701	43.9809	FALSE	0
2022-09-15	12:22:34	1.24057	5.5183	44.135	FALSE	0
2022-09-15	12:22:34	1.25869	5.5989	49.5798	FALSE	0
2022-09-15	12:22:35	1.24719	5.54775	49.6827	FALSE	0
2022-09-15	12:22:35	1.25345	5.5756	55.1554	FALSE	0
2022-09-15	12:22:35	1.31187	5.83546	55.5182	FALSE	0
2022-09-15	12:22:35	0.508664	2.26264	57.418	FALSE	0
2022-09-15	12:22:36	0.208817	0.92886	56.4471	FALSE	0
2022-09-15	12:22:36	0.152837	0.67985	58.0979	FALSE	0
2022-09-15	12:22:36	0.141387	0.628918	57.076	FALSE	0
2022-09-15	12:22:36	0.171463	0.762702	58.8606	FALSE	0
2022-09-15	12:22:37	0.284593	1.26593	58.3419	FALSE	0
2022-09-15	12:22:37	0.305305	1.35806	60.2186	FALSE	0
2022-09-15	12:22:37	0.186018	0.827445	59.1694	FALSE	0
2022-09-15	12:22:38	0.0979264	0.435596	60.6542	FALSE	0
2022-09-15	12:22:38	-0.0436511	-0.194169	59.1694	FALSE	0
2022-09-15	12:22:38	-0.041412	-0.184209	60.6542	FALSE	0
2022-09-15	12:22:38	-0.0215138	-0.0956977	59.1694	FALSE	0
2022-09-15	12:22:39	0.229071	1.01895	61.6732	FALSE	0
2022-09-15	12:22:39	0.0305982	0.136107	59.3055	FALSE	0
2022-09-15	12:22:39	0.196552	0.874303	62.5475	FALSE	0
2022-09-15	12:22:39	0.0602165	0.267855	59.5733	FALSE	0
2022-09-15	12:22:40	0.414262	1.84272	64.3902	FALSE	0
2022-09-15	12:22:40	0.176349	0.784436	60.3577	FALSE	0
2022-09-15	12:22:40	0.433041	1.92625	66.3164	FALSE	0
2022-09-15	12:22:40	0.192379	0.85574	61.2135	FALSE	0
2022-09-15	12:22:41	0.610547	2.71584	69.0323	FALSE	0
2022-09-15	12:22:41	0.3764	1.6743	62.8878	FALSE	0
2022-09-15	12:22:41	0.413448	1.8391	70.8714	FALSE	0
2022-09-15	12:22:42	0.363219	1.61567	64.5035	FALSE	0
2022-09-15	12:22:42	0.324797	1.44476	72.3161	FALSE	0
2022-09-15	12:22:42	0.306527	1.36349	65.867	FALSE	0
2022-09-15	12:22:42	0.346781	1.54255	73.8587	FALSE	0
2022-09-15	12:22:43	0.0730918	0.325127	66.1921	FALSE	0
2022-09-15	12:22:43	0.183626	0.816805	74.6755	FALSE	0
2022-09-15	12:22:43	0.309937	1.37866	67.5707	FALSE	0
2022-09-15	12:22:43	0.244491	1.08754	75.763	FALSE	0
2022-09-15	12:22:44	0.34271	1.52444	69.0952	FALSE	0
2022-09-15	12:22:44	0.275331	1.22473	76.9878	FALSE	0
2022-09-15	12:22:44	0.272176	1.21069	70.3059	FALSE	0
2022-09-15	12:22:45	0.540267	2.40322	79.391	FALSE	0
2022-09-15	12:22:45	0.60159	2.67599	72.9819	FALSE	0
2022-09-15	12:22:45	0.720165	3.20344	82.5944	FALSE	0
2022-09-15	12:22:45	0.874619	3.89048	76.8724	FALSE	0
2022-09-15	12:22:46	1.10296	4.90619	87.5006	FALSE	0
2022-09-15	12:22:46	1.2366	5.50064	82.373	FALSE	0
2022-09-15	12:22:46	1.75385	7.80148	95.3021	FALSE	0
2022-09-15	12:22:46	0.588766	2.61895	84.9919	FALSE	0
2022-09-15	12:22:47	0.291921	1.29852	96.6006	FALSE	0
2022-09-15	12:22:47	0.460929	2.0503	87.0423	FALSE	0
2022-09-15	12:22:47	0.43757	1.9464	98.547	FALSE	0
2022-09-15	12:22:47	0.347646	1.5464	88.5886	FALSE	0
2022-09-15	12:22:48	0.283779	1.26231	99.8093	FALSE	0
2022-09-15	12:22:48	0.419453	1.86581	90.4545	FALSE	0
2022-09-15	12:22:48	0.137672	0.612393	100.422	FALSE	0
2022-09-15	12:22:48	0.203881	0.906903	91.3614	FALSE	0
2022-09-15	12:22:49	0.277723	1.23537	101.657	FALSE	0
2022-09-15	12:22:49	-0.0382568	-0.170174	91.3614	FALSE	0
2022-09-15	12:22:49	-0.221056	-0.983301	101.657	FALSE	0
2022-09-15	12:22:50	-0.0268572	-0.119466	91.3614	FALSE	0
2022-09-15	12:22:50	0.205967	0.916182	102.573	FALSE	0
2022-09-15	12:22:50	0.472532	2.10192	93.4633	FALSE	0
2022-09-15	12:22:50	0.131921	0.586811	103.16	FALSE	0
2022-09-15	12:22:51	0.324033	1.44136	94.9046	FALSE	0
2022-09-15	12:22:51	0.216959	0.965077	104.125	FALSE	0
2022-09-15	12:22:51	0.533448	2.37288	97.2775	FALSE	0
2022-09-15	12:22:51	0.199657	0.888114	105.013	FALSE	0
2022-09-15	12:22:52	0.369784	1.64487	98.9224	FALSE	0
2022-09-15	12:22:52	0.18958	0.84329	105.857	FALSE	0
2022-09-15	12:22:52	0.268206	1.19303	100.115	FALSE	0
2022-09-15	12:22:53	0.252786	1.12444	106.981	FALSE	0
2022-09-15	12:22:53	0.287799	1.28019	101.396	FALSE	0
2022-09-15	12:22:53	0.323321	1.4382	108.419	FALSE	0
2022-09-15	12:22:53	0.220216	0.979565	102.375	FALSE	0
2022-09-15	12:22:54	0.28673	1.27543	109.695	FALSE	0
2022-09-15	12:22:54	0.182761	0.812957	103.188	FALSE	0
2022-09-15	12:22:54	0.109631	0.487661	110.182	FALSE	0
2022-09-15	12:22:54	-0.0304196	-0.135312	103.188	FALSE	0
2022-09-15	12:22:55	-0.0661956	-0.294451	110.182	FALSE	0
2022-09-15	12:22:55	-0.0920481	-0.409448	103.188	FALSE	0
2022-09-15	12:22:55	-0.111437	-0.495694	110.182	FALSE	0
2022-09-15	12:22:55	-0.448485	-1.99495	103.188	FALSE	0
2022-09-15	12:22:56	-0.674287	-2.99936	110.182	FALSE	0
2022-09-15	12:22:56	-0.350317	-1.55828	103.188	FALSE	0
2022-09-15	12:22:56	0.133804	0.595187	110.777	FALSE	0
2022-09-15	12:22:56	0.262557	1.16791	104.356	FALSE	0
2022-09-15	12:22:57	0.49584	2.2056	112.983	FALSE	0
2022-09-15	12:22:57	0.294618	1.31052	105.667	FALSE	0
2022-09-15	12:22:57	0.435026	1.93508	114.918	FALSE	0
2022-09-15	12:22:58	0.412074	1.83299	107.5	FALSE	0
2022-09-15	12:22:58	0.508257	2.26083	117.179	FALSE	0
2022-09-15	12:22:58	0.349377	1.5541	109.054	FALSE	0
2022-09-15	12:22:58	0.354262	1.57583	118.755	FALSE	0
2022-09-15	12:22:59	0.371768	1.6537	110.707	FALSE	0
2022-09-15	12:22:59	0.315738	1.40447	120.159	FALSE	0
2022-09-15	12:22:59	0.26042	1.1584	111.866	FALSE	0
2022-09-15	12:22:59	0.328766	1.46242	121.622	FALSE	0
2022-09-15	12:23:00	0.730496	3.24939	115.115	FALSE	0
2022-09-15	12:23:00	0.638995	2.84238	124.464	FALSE	0
2022-09-15	12:23:00	-0.290267	-1.29117	115.115	FALSE	0
2022-09-15	12:23:00	-0.597035	-2.65573	124.464	FALSE	0
2022-09-15	12:23:01	-0.473524	-2.10633	115.115	FALSE	0
2022-09-15	12:23:01	-0.246755	-1.09762	124.464	FALSE	0
2022-09-15	12:23:01	-0.217748	-0.968587	115.115	FALSE	0
2022-09-15	12:23:02	-0.324567	-1.44374	124.464	FALSE	0
2022-09-15	12:23:02	-0.204872	-0.911312	115.115	FALSE	0
2022-09-15	12:23:02	-0.297035	-1.32127	124.464	FALSE	0
2022-09-15	12:23:02	-0.103244	-0.45925	115.115	FALSE	0
2022-09-15	12:23:03	-0.330419	-1.46977	124.464	FALSE	0
2022-09-15	12:23:03	-0.249911	-1.11165	115.115	FALSE	0
2022-09-15	12:23:03	-0.286297	-1.27351	124.464	FALSE	0
2022-09-15	12:23:03	-0.204211	-0.908371	115.115	FALSE	0
2022-09-15	12:23:04	-0.31444	-1.39869	124.464	FALSE	0
2022-09-15	12:23:04	-0.160954	-0.715956	115.115	FALSE	0
2022-09-15	12:23:04	-0.214745	-0.955229	124.464	FALSE	0
2022-09-15	12:23:05	-0.0844145	-0.375493	115.115	FALSE	0
2022-09-15	12:23:05	-0.118257	-0.526031	124.464	FALSE	0
2022-09-15	12:23:05	0.22612	1.00583	116.121	FALSE	0
2022-09-15	12:23:05	0.253651	1.12829	125.592	FALSE	0
2022-09-15	12:23:06	0.217519	0.967568	117.089	FALSE	0
2022-09-15	12:23:06	0.111667	0.496717	126.089	FALSE	0
2022-09-15	12:23:06	0.26327	1.17108	118.26	FALSE	0
2022-09-15	12:23:06	0.182303	0.81092	126.9	FALSE	0
2022-09-15	12:23:07	0.0645422	0.287097	118.547	FALSE	0
2022-09-15	12:23:07	0.0138043	0.0614043	126.961	FALSE	0
2022-09-15	12:23:07	0.0498857	0.221902	118.769	FALSE	0
2022-09-15	12:23:07	0.00871527	0.0387673	127	FALSE	0
2022-09-15	12:23:08	0.0312597	0.139049	118.908	FALSE	0
2022-09-15	12:23:08	0.0501401	0.223033	127.223	FALSE	0
2022-09-15	12:23:08	0.132583	0.589756	119.497	FALSE	0
2022-09-15	12:23:08	0.0722267	0.321279	127.544	FALSE	0
2022-09-15	12:23:09	-0.0947961	-0.421672	119.497	FALSE	0
2022-09-15	12:23:09	0.0160435	0.0713647	127.616	FALSE	0
2022-09-15	12:23:09	-0.00517788	-0.0230322	119.497	FALSE	0
2022-09-15	12:23:10	0.032074	0.142672	127.759	FALSE	0
2022-09-15	12:23:10	-0.100089	-0.445216	119.497	FALSE	0
2022-09-15	12:23:10	0.0150765	0.0670633	127.826	FALSE	0
2022-09-15	12:23:10	-0.00365114	-0.016241	119.497	FALSE	0
2022-09-15	12:23:11	0.0140078	0.0623095	127.888	FALSE	0
2022-09-15	12:23:11	-0.100445	-0.446799	119.497	FALSE	0
2022-09-15	12:23:11	-0.0109794	-0.0488386	127.888	FALSE	0
2022-09-15	12:23:11	-0.00365114	-0.016241	119.497	FALSE	0
2022-09-15	12:23:12	-0.112964	-0.502486	127.888	FALSE	0
2022-09-15	12:23:12	0.0728883	0.324222	119.822	FALSE	0
2022-09-15	12:23:12	0.0559417	0.24884	128.137	FALSE	0
2022-09-15	12:23:12	0.26785	1.19145	121.013	FALSE	0
2022-09-15	12:23:13	0.172481	0.76723	128.904	FALSE	0
2022-09-15	12:23:13	0.230293	1.02439	122.037	FALSE	0
2022-09-15	12:23:13	0.066985	0.297963	129.202	FALSE	0
2022-09-15	12:23:14	0.234924	1.04499	123.082	FALSE	0
2022-09-15	12:23:14	0.167952	0.747084	129.949	FALSE	0
2022-09-15	12:23:14	0.028359	0.126147	123.209	FALSE	0
2022-09-15	12:23:14	0.257214	1.14414	131.093	FALSE	0
2022-09-15	12:23:15	0.00138701	0.0061697	123.215	FALSE	0
2022-09-15	12:23:15	0.22159	0.985677	132.079	FALSE	0
2022-09-15	12:23:15	0.0583336	0.25948	123.474	FALSE	0
2022-09-15	12:23:15	0.182507	0.811828	132.891	FALSE	0
2022-09-15	12:23:16	-0.0133204	-0.0592518	123.474	FALSE	0
2022-09-15	12:23:16	0.123779	0.550594	133.441	FALSE	0
2022-09-15	12:23:16	0.133702	0.594733	124.069	FALSE	0
2022-09-15	12:23:16	0.411056	1.82846	135.27	FALSE	0
2022-09-15	12:23:17	0.156858	0.697736	124.767	FALSE	0
2022-09-15	12:23:17	0.112074	0.498528	135.768	FALSE	0
2022-09-15	12:23:17	0.0166033	0.0738548	124.841	FALSE	0
2022-09-15	12:23:18	-0.0638038	-0.283812	135.768	FALSE	0
2022-09-15	12:23:18	-0.227061	-1.01001	124.841	FALSE	0
2022-09-15	12:23:18	-0.419936	-1.86796	135.768	FALSE	0
2022-09-15	12:23:18	-0.315407	-1.40299	124.841	FALSE	0
2022-09-15	12:23:19	-0.37215	-1.6554	135.768	FALSE	0
2022-09-15	12:23:19	-0.399173	-1.7756	124.841	FALSE	0
2022-09-15	12:23:19	-0.322175	-1.4331	135.768	FALSE	0
2022-09-15	12:23:19	-0.231234	-1.02858	124.841	FALSE	0
2022-09-15	12:23:20	-0.0713865	-0.317541	135.768	FALSE	0
2022-09-15	12:23:20	-0.155661	-0.692411	124.841	FALSE	0
2022-09-15	12:23:20	0.218588	0.972323	136.741	FALSE	0
2022-09-15	12:23:21	0.351667	1.56429	126.405	FALSE	0
2022-09-15	12:23:21	0.999504	4.44599	141.187	FALSE	0
2022-09-15	12:23:21	0.888461	3.95205	130.357	FALSE	0
2022-09-15	12:23:21	0.892939	3.97197	145.159	FALSE	0
2022-09-15	12:23:22	0.866527	3.85449	134.211	FALSE	0
2022-09-15	12:23:22	0.0975193	0.433785	145.592	FALSE	0
2022-09-15	12:23:22	0.221285	0.98432	135.196	FALSE	0
2022-09-15	12:23:22	0.322812	1.43593	147.028	FALSE	0
2022-09-15	12:23:23	-0.0326588	-0.145273	135.196	FALSE	0
2022-09-15	12:23:23	0.0674429	0.3	147.328	FALSE	0
2022-09-15	12:23:23	-0.0669081	-0.297621	135.196	FALSE	0
2022-09-15	12:23:23	0.106629	0.474307	147.803	FALSE	0
2022-09-15	12:23:24	-0.118918	-0.528971	135.196	FALSE	0
2022-09-15	12:23:24	-0.0494527	-0.219976	147.803	FALSE	0
2022-09-15	12:23:24	0.0970612	0.431748	135.627	FALSE	0
2022-09-15	12:23:24	0.0130918	0.0582349	147.861	FALSE	0
2022-09-15	12:23:25	0.140827	0.626427	136.254	FALSE	0
2022-09-15	12:23:25	0.177417	0.789186	148.65	FALSE	0
2022-09-15	12:23:25	0.214211	0.952853	137.207	FALSE	0
2022-09-15	12:23:26	0.137163	0.610128	149.26	FALSE	0
2022-09-15	12:23:26	0.136603	0.607637	137.814	FALSE	0
2022-09-15	12:23:26	0.124797	0.555122	149.815	FALSE	0
2022-09-15	12:23:26	0.113092	0.503056	138.317	FALSE	0
2022-09-15	12:23:27	0.0420994	0.187267	150.002	FALSE	0
2022-09-15	12:23:27	-0.176374	-0.784547	138.317	FALSE	0
2022-09-15	12:23:27	-0.285687	-1.27079	150.002	FALSE	0
2022-09-15	12:23:27	-0.0797325	-0.354666	138.317	FALSE	0
2022-09-15	12:23:28	-0.128282	-0.570624	150.002	FALSE	0
2022-09-15	12:23:28	-0.078104	-0.347422	138.317	FALSE	0
2022-09-15	12:23:28	-0.0583585	-0.25959	150.002	FALSE	0
2022-09-15	12:23:29	-0.0790201	-0.351497	138.317	FALSE	0
2022-09-15	12:23:29	0.0280028	0.124562	150.127	FALSE	0
2022-09-15	12:23:29	-0.143448	-0.638085	138.317	FALSE	0
2022-09-15	12:23:29	-0.000597729	-0.00265882	150.127	FALSE	0
2022-09-15	12:23:30	-0.12986	-0.577643	138.317	FALSE	0
2022-09-15	12:23:30	-0.0656867	-0.292188	150.127	FALSE	0
2022-09-15	12:23:30	-0.0502669	-0.223597	138.317	FALSE	0
2022-09-15	12:23:30	-0.0675188	-0.300337	150.127	FALSE	0
2022-09-15	12:23:31	0.178944	0.795979	139.113	FALSE	0
2022-09-15	12:23:31	-0.18131	-0.806503	150.127	FALSE	0
2022-09-15	12:23:31	0.110293	0.490605	139.604	FALSE	0
2022-09-15	12:23:31	1.3309	5.92011	156.047	FALSE	0
2022-09-15	12:23:32	3.05691	13.5977	153.202	1	1
2022-09-15	12:23:32	2.82317	12.558	168.605	FALSE	1
2022-09-15	12:23:32	2.28851	10.1798	163.382	FALSE	1
2022-09-15	12:23:32	1.51396	6.7344	175.34	FALSE	1
2022-09-15	12:23:33	1.32164	5.87892	169.26	FALSE	1
2022-09-15	12:23:33	1.93604	8.61189	183.951	FALSE	1
2022-09-15	12:23:33	1.10327	4.90757	174.168	FALSE	1
2022-09-15	12:23:34	2.52607	11.2365	195.188	FALSE	1
2022-09-15	12:23:34	1.76607	7.85583	182.024	FALSE	1
2022-09-15	12:23:34	1.00632	4.47631	199.664	FALSE	1
2022-09-15	12:23:34	1.74337	7.75486	189.779	FALSE	1
2022-09-15	12:23:35	0.790344	3.51561	203.18	FALSE	1
2022-09-15	12:23:35	0.697163	3.10112	192.88	FALSE	1
2022-09-15	12:23:35	0.534109	2.37582	205.556	FALSE	1
2022-09-15	12:23:35	0.323117	1.43729	194.317	FALSE	1
2022-09-15	12:23:36	0.355178	1.5799	207.136	FALSE	1
2022-09-15	12:23:36	0.191972	0.85393	195.171	FALSE	1
2022-09-15	12:23:36	0.440166	1.95795	209.094	FALSE	1
2022-09-15	12:23:37	0.291311	1.29581	196.467	FALSE	1
2022-09-15	12:23:37	0.330649	1.47079	210.564	FALSE	1
2022-09-15	12:23:37	0.337214	1.5	197.967	FALSE	1
2022-09-15	12:23:37	0.221285	0.98432	211.549	FALSE	1
2022-09-15	12:23:38	0.227443	1.01171	198.979	FALSE	1
2022-09-15	12:23:38	0.190089	0.845554	212.394	FALSE	1
2022-09-15	12:23:38	0.0715142	0.318109	199.297	FALSE	1
2022-09-15	12:23:38	-0.0401906	-0.178776	212.394	FALSE	1
2022-09-15	12:23:39	-0.090674	-0.403336	199.297	FALSE	1
2022-09-15	12:23:39	0.026985	0.120035	212.514	FALSE	1
2022-09-15	12:23:39	0.00556005	0.0247322	199.321	FALSE	1
2022-09-15	12:23:39	0.0162979	0.0724963	212.587	FALSE	1
2022-09-15	12:23:40	0.0261707	0.116413	199.438	FALSE	1
2022-09-15	12:23:40	-0.00100484	-0.00446973	212.587	FALSE	1
2022-09-15	12:23:40	-0.0374425	-0.166552	199.438	FALSE	1
2022-09-15	12:23:41	-0.0997326	-0.443631	212.587	FALSE	1
2022-09-15	12:23:41	-0.199529	-0.887545	199.438	FALSE	1
2022-09-15	12:23:41	-0.284364	-1.26491	212.587	FALSE	1
2022-09-15	12:23:41	-0.398918	-1.77447	199.438	FALSE	1
2022-09-15	12:23:42	-0.292913	-1.30294	212.587	FALSE	1
2022-09-15	12:23:42	-0.183549	-0.816463	199.438	FALSE	1
2022-09-15	12:23:42	-0.169554	-0.75421	212.587	FALSE	1
2022-09-15	12:23:42	-0.172455	-0.767114	199.438	FALSE	1
2022-09-15	12:23:43	-0.103804	-0.461741	212.587	FALSE	1
2022-09-15	12:23:43	-0.0555086	-0.246913	199.438	FALSE	1
2022-09-15	12:23:43	-0.139478	-0.620426	212.587	FALSE	1
2022-09-15	12:23:43	-0.0976969	-0.434575	199.438	FALSE	1
2022-09-15	12:23:44	0.18785	0.835594	213.422	FALSE	1
2022-09-15	12:23:44	0.725153	3.22563	202.663	FALSE	1
2022-09-15	12:23:44	0.471107	2.09558	215.518	FALSE	1
2022-09-15	12:23:45	-0.058613	-0.260722	202.663	FALSE	1
2022-09-15	12:23:45	-0.155712	-0.692638	215.518	FALSE	1
2022-09-15	12:23:45	-0.0532694	-0.236953	202.663	FALSE	1
2022-09-15	12:23:45	0.0204201	0.0908327	215.609	FALSE	1
2022-09-15	12:23:46	0.156451	0.695925	203.359	FALSE	1
2022-09-15	12:23:46	0.285	1.26774	216.876	FALSE	1
2022-09-15	12:23:46	0.716145	3.18556	206.545	FALSE	1
2022-09-15	12:23:46	0.489071	2.17549	219.052	FALSE	1
2022-09-15	12:23:47	0.50841	2.26151	208.806	FALSE	1
2022-09-15	12:23:47	0.316298	1.40696	220.459	FALSE	1
2022-09-15	12:23:47	0.556348	2.47475	211.281	FALSE	1
2022-09-15	12:23:47	0.36154	1.6082	222.067	FALSE	1
2022-09-15	12:23:48	0.342659	1.52422	212.805	FALSE	1
2022-09-15	12:23:48	0.440674	1.96021	224.027	FALSE	1
2022-09-15	12:23:48	0.537621	2.39145	215.197	FALSE	1
2022-09-15	12:23:49	1.43192	6.36947	230.397	FALSE	1
2022-09-15	12:23:49	1.43538	6.38486	221.582	FALSE	1
2022-09-15	12:23:49	2.06724	9.1955	239.592	FALSE	1
2022-09-15	12:23:49	0.988868	4.39868	225.98	FALSE	1
2022-09-15	12:23:50	0.819555	3.64554	243.238	FALSE	1
2022-09-15	12:23:50	0.664949	2.95783	228.938	FALSE	1
2022-09-15	12:23:50	0.240522	1.06989	244.308	FALSE	1
2022-09-15	12:23:50	0.249275	1.10883	230.047	FALSE	1
2022-09-15	12:23:51	0.288003	1.28109	245.589	FALSE	1
2022-09-15	12:23:51	0.332176	1.47759	231.525	FALSE	1
2022-09-15	12:23:51	0.489886	2.17911	247.768	FALSE	1
2022-09-15	12:23:51	1.33492	5.93799	237.463	FALSE	1
2022-09-15	12:23:52	3.63945	16.189	263.957	1	2
2022-09-15	12:23:52	3.79395	16.8762	254.339	1	3
2022-09-15	12:23:52	1.64627	7.32294	271.28	FALSE	3
2022-09-15	12:23:53	0.811666	3.61045	257.949	FALSE	3
2022-09-15	12:23:53	0.674262	2.99925	274.279	FALSE	3
2022-09-15	12:23:53	0.388919	1.72999	259.679	FALSE	3
2022-09-15	12:23:53	0.51869	2.30724	276.586	FALSE	3
2022-09-15	12:23:54	1.17141	5.21067	264.89	FALSE	3
2022-09-15	12:23:54	0.496247	2.20741	278.794	FALSE	3
2022-09-15	12:23:54	-0.0650761	-0.289472	264.89	FALSE	3
2022-09-15	12:23:54	-0.109605	-0.487545	278.794	FALSE	3
2022-09-15	12:23:55	-0.0797325	-0.354666	264.89	FALSE	3
2022-09-15	12:23:55	-0.0302669	-0.134633	278.794	FALSE	3
2022-09-15	12:23:55	0.255534	1.13667	266.027	FALSE	3
2022-09-15	12:23:55	0.431412	1.91901	280.713	FALSE	3
2022-09-15	12:23:56	0.242405	1.07827	267.105	FALSE	3
2022-09-15	12:23:56	0.42159	1.87532	282.588	FALSE	3
2022-09-15	12:23:56	0.382964	1.7035	268.808	FALSE	3
2022-09-15	12:23:57	0.449631	2.00005	284.588	FALSE	3
2022-09-15	12:23:57	0.479606	2.13338	270.942	FALSE	3
2022-09-15	12:23:57	0.385051	1.71278	286.301	FALSE	3
2022-09-15	12:23:57	0.435891	1.93893	272.881	FALSE	3
2022-09-15	12:23:58	0.427036	1.89954	288.2	FALSE	3
2022-09-15	12:23:58	0.380369	1.69196	274.573	FALSE	3
2022-09-15	12:23:58	0.290649	1.29286	289.493	FALSE	3
2022-09-15	12:23:59	0.323779	1.44023	276.013	FALSE	3
2022-09-15	12:23:59	0.355942	1.5833	291.077	FALSE	3
2022-09-15	12:23:59	0.555076	2.46909	278.482	FALSE	3
2022-09-15	12:23:59	0.668359	2.97299	294.05	FALSE	3
2022-09-15	12:23:59	0.470954	2.0949	280.577	FALSE	3
2022-09-15	12:24:00	0.727952	3.23808	297.288	FALSE	3
2022-09-15	12:24:00	0.347646	1.5464	282.123	FALSE	3
2022-09-15	12:24:00	0.296807	1.32026	298.608	FALSE	3
2022-09-15	12:24:01	0.266221	1.1842	283.308	FALSE	3
2022-09-15	12:24:01	0.217316	0.966665	299.575	FALSE	3
2022-09-15	12:24:01	0.202201	0.89943	284.207	FALSE	3
2022-09-15	12:24:01	0.181336	0.806619	300.381	FALSE	3
2022-09-15	12:24:02	0.147341	0.655402	284.862	FALSE	3
2022-09-15	12:24:02	0.118537	0.527276	300.908	FALSE	3
2022-09-15	12:24:02	0.102507	0.455972	285.318	FALSE	3
2022-09-15	12:24:02	0.108664	0.483359	301.392	FALSE	3
2022-09-15	12:24:03	0.107087	0.476344	285.795	FALSE	3
2022-09-15	12:24:03	0.101947	0.453481	301.845	FALSE	3
2022-09-15	12:24:03	0.114364	0.508714	286.303	FALSE	3
2022-09-15	12:24:03	0.131158	0.583417	302.429	FALSE	3
2022-09-15	12:24:04	0.136858	0.608772	286.912	FALSE	3
2022-09-15	12:24:04	0.115484	0.513696	302.942	FALSE	3
2022-09-15	12:24:04	0.107392	0.477701	287.39	FALSE	3
2022-09-15	12:24:05	0.139199	0.619185	303.562	FALSE	3
2022-09-15	12:24:05	0.175229	0.779454	288.169	FALSE	3
2022-09-15	12:24:05	0.0890714	0.396207	303.958	FALSE	3
2022-09-15	12:24:05	0.0269341	0.119808	288.289	FALSE	3
2022-09-15	12:24:06	0.0991478	0.441029	304.399	FALSE	3
2022-09-15	12:24:06	0.120674	0.536782	288.826	FALSE	3
2022-09-15	12:24:06	-0.0189183	-0.0841524	304.399	FALSE	3
2022-09-15	12:24:06	-0.0722516	-0.32139	288.826	FALSE	3
2022-09-15	12:24:07	-0.137035	-0.609559	304.399	FALSE	3
2022-09-15	12:24:07	-0.18818	-0.837062	288.826	FALSE	3
2022-09-15	12:24:07	-0.194542	-0.865362	304.399	FALSE	3
2022-09-15	12:24:07	-0.140343	-0.624274	288.826	FALSE	3
2022-09-15	12:24:08	-0.216883	-0.964739	304.399	FALSE	3
2022-09-15	12:24:08	-0.281412	-1.25178	288.826	FALSE	3
2022-09-15	12:24:08	-0.071132	-0.316409	304.399	FALSE	3
2022-09-15	12:24:09	0.0427611	0.19021	289.016	FALSE	3
2022-09-15	12:24:09	-0.183804	-0.817597	304.399	FALSE	3
2022-09-15	12:24:09	-0.00619567	-0.0275596	289.016	FALSE	3
2022-09-15	12:24:09	0.683117	3.03864	307.438	FALSE	3
2022-09-15	12:24:10	1.88357	8.3785	297.395	FALSE	3
2022-09-15	12:24:10	1.48968	6.62639	314.064	FALSE	3
2022-09-15	12:24:10	1.18317	5.26298	302.658	FALSE	3
2022-09-15	12:24:10	0.297163	1.32184	315.386	FALSE	3
2022-09-15	12:24:11	0.368155	1.63763	304.295	FALSE	3
2022-09-15	12:24:11	0.293295	1.30463	316.69	FALSE	3
2022-09-15	12:24:11	-0.0555086	-0.246913	304.295	FALSE	3
2022-09-15	12:24:11	-0.31276	-1.39122	316.69	FALSE	3
2022-09-15	12:24:12	-0.215356	-0.957947	304.295	FALSE	3
2022-09-15	12:24:12	-0.0295545	-0.131464	316.69	FALSE	3
2022-09-15	12:24:12	0.034415	0.153085	304.448	FALSE	3
2022-09-15	12:24:13	0.144644	0.643405	317.334	FALSE	3
2022-09-15	12:24:13	0.14729	0.655175	305.103	FALSE	3
2022-09-15	12:24:13	0.169275	0.752969	318.087	FALSE	3
2022-09-15	12:24:13	0.263015	1.16994	306.273	FALSE	3
2022-09-15	12:24:14	0.115942	0.515733	318.602	FALSE	3
2022-09-15	12:24:14	0.021845	0.0971709	306.371	FALSE	3
2022-09-15	12:24:14	0.0522776	0.232541	318.835	FALSE	3
2022-09-15	12:24:15	0.293448	1.30532	307.676	FALSE	3
2022-09-15	12:24:15	0.36673	1.63129	320.466	FALSE	3
2022-09-15	12:24:15	0.675127	3.0031	310.679	FALSE	3
2022-09-15	12:24:15	0.478639	2.12908	322.595	FALSE	3
2022-09-15	12:24:15	0.270547	1.20345	311.882	FALSE	3
2022-09-15	12:24:16	0.158944	0.707015	323.302	FALSE	3
2022-09-15	12:24:16	0.0909544	0.404583	312.287	FALSE	3
2022-09-15	12:24:16	0.0161961	0.0720435	323.374	FALSE	3
2022-09-15	12:24:17	-0.0964246	-0.428916	312.287	FALSE	3
2022-09-15	12:24:17	-0.225025	-1.00096	323.374	FALSE	3
2022-09-15	12:24:17	-0.25103	-1.11663	312.287	FALSE	3
2022-09-15	12:24:17	-0.294084	-1.30814	323.374	FALSE	3
2022-09-15	12:24:18	-0.4122	-1.83355	312.287	FALSE	3
2022-09-15	12:24:18	-0.640597	-2.8495	323.374	FALSE	3
2022-09-15	12:24:18	-0.6865	-3.05369	312.287	FALSE	3
2022-09-15	12:24:18	-0.893931	-3.97638	323.374	FALSE	3
2022-09-15	12:24:19	-0.727264	-3.23502	312.287	FALSE	3
2022-09-15	12:24:19	-0.88416	-3.93292	323.374	FALSE	3
2022-09-15	12:24:19	-0.746246	-3.31945	312.287	FALSE	3
2022-09-15	12:24:19	-0.592811	-2.63694	323.374	FALSE	3
2022-09-15	12:24:20	0.163779	0.728522	313.016	FALSE	3
2022-09-15	12:24:20	1.90011	8.45207	331.827	FALSE	3
2022-09-15	12:24:20	3.22866	14.3617	327.377	1	4
2022-09-15	12:24:21	5.36103	23.8469	355.673	1	5
2022-09-15	12:24:21	3.77238	16.7803	344.158	1	6
2022-09-15	12:24:21	4.38851	19.521	375.194	1	7
2022-09-15	12:24:21	1.41151	6.27868	350.436	FALSE	7
2022-09-15	12:24:22	0.390649	1.73768	376.932	FALSE	7
2022-09-15	12:24:22	0.634974	2.82449	353.261	FALSE	7
2022-09-15	12:24:22	0.441998	1.9661	378.898	FALSE	7
2022-09-15	12:24:22	0.0929391	0.413412	353.674	FALSE	7
2022-09-15	12:24:23	0.496094	2.20673	381.105	FALSE	7
2022-09-15	12:24:23	0.0928883	0.413186	354.087	FALSE	7
2022-09-15	12:24:23	0.617672	2.74753	383.852	FALSE	7
2022-09-15	12:24:23	0.590242	2.62551	356.713	FALSE	7
2022-09-15	12:24:24	0.806577	3.58782	387.44	FALSE	7
2022-09-15	12:24:24	0.761692	3.38816	360.101	FALSE	7
2022-09-15	12:24:24	0.446221	1.98488	389.425	FALSE	7
2022-09-15	12:24:25	0.685204	3.04792	363.149	FALSE	7
2022-09-15	12:24:25	0.720369	3.20435	392.63	FALSE	7
2022-09-15	12:24:25	0.258741	1.15093	364.3	FALSE	7
2022-09-15	12:24:25	0.564135	2.50939	395.139	FALSE	7
2022-09-15	12:24:26	0.480216	2.1361	366.436	FALSE	7
2022-09-15	12:24:26	0.42098	1.8726	397.011	FALSE	7
2022-09-15	12:24:26	0.504695	2.24498	368.681	FALSE	7
2022-09-15	12:24:26	0.240725	1.07079	398.082	FALSE	7
2022-09-15	12:24:27	0.763575	3.39653	372.077	FALSE	7
2022-09-15	12:24:27	0.384237	1.70916	399.791	FALSE	7
2022-09-15	12:24:27	0.604847	2.69048	374.768	FALSE	7
2022-09-15	12:24:27	0.706069	3.14074	402.932	FALSE	7
2022-09-15	12:24:28	0.728715	3.24147	378.009	FALSE	7
2022-09-15	12:24:28	0.723575	3.21861	406.151	FALSE	7
2022-09-15	12:24:28	0.486679	2.16485	380.174	FALSE	7
2022-09-15	12:24:29	0.674313	2.99948	409.15	FALSE	7
2022-09-15	12:24:29	0.732481	3.25822	383.432	FALSE	7
2022-09-15	12:24:29	0.659606	2.93406	412.084	FALSE	7
2022-09-15	12:24:29	0.573855	2.55262	385.985	FALSE	7
2022-09-15	12:24:30	0.726832	3.23309	415.317	FALSE	7
2022-09-15	12:24:30	0.733244	3.26162	389.247	FALSE	7
2022-09-15	12:24:30	0.731005	3.25166	418.569	FALSE	7
2022-09-15	12:24:30	0.688003	3.06037	392.307	FALSE	7
2022-09-15	12:24:31	0.730293	3.24849	421.818	FALSE	7
2022-09-15	12:24:31	0.733346	3.26207	395.569	FALSE	7
2022-09-15	12:24:31	0.728766	3.2417	425.059	FALSE	7
2022-09-15	12:24:31	0.723015	3.21612	398.785	FALSE	7
2022-09-15	12:24:32	0.73472	3.26818	428.327	FALSE	7
2022-09-15	12:24:32	0.728817	3.24192	402.027	FALSE	7
2022-09-15	12:24:32	0.734924	3.26909	431.597	FALSE	7
2022-09-15	12:24:33	0.730852	3.25098	405.278	FALSE	7
2022-09-15	12:24:33	0.726832	3.23309	434.83	FALSE	7
2022-09-15	12:24:33	0.727545	3.23627	408.514	FALSE	7
2022-09-15	12:24:33	0.735992	3.27384	438.103	FALSE	7
2022-09-15	12:24:34	0.728868	3.24215	411.757	FALSE	7
2022-09-15	12:24:34	0.729886	3.24668	441.35	FALSE	7
2022-09-15	12:24:34	0.720318	3.20412	414.961	FALSE	7
2022-09-15	12:24:34	0.733295	3.26184	444.612	FALSE	7
2022-09-15	12:24:35	0.734008	3.26501	418.226	FALSE	7
2022-09-15	12:24:35	0.732277	3.25731	447.869	FALSE	7
2022-09-15	12:24:35	0.727341	3.23536	421.461	FALSE	7
2022-09-15	12:24:35	0.730242	3.24826	451.118	FALSE	7
2022-09-15	12:24:36	0.731361	3.25324	424.714	FALSE	7
2022-09-15	12:24:36	0.736043	3.27407	454.392	FALSE	7
2022-09-15	12:24:36	0.727799	3.2374	427.952	FALSE	7
2022-09-15	12:24:37	0.727697	3.23694	457.629	FALSE	7
2022-09-15	12:24:37	0.730903	3.2512	431.203	FALSE	7
2022-09-15	12:24:37	0.727748	3.23717	460.866	FALSE	7
2022-09-15	12:24:37	0.727188	3.23468	434.438	FALSE	7
2022-09-15	12:24:38	0.734466	3.26705	464.133	FALSE	7
2022-09-15	12:24:38	0.734669	3.26795	437.706	FALSE	7
2022-09-15	12:24:38	0.731565	3.25415	467.387	FALSE	7
2022-09-15	12:24:38	0.73187	3.2555	440.961	FALSE	7
2022-09-15	12:24:39	0.733855	3.26433	470.651	FALSE	7
2022-09-15	12:24:39	0.729377	3.24441	444.205	FALSE	7
2022-09-15	12:24:39	0.73355	3.26298	473.914	FALSE	7
2022-09-15	12:24:39	0.734669	3.26795	447.473	FALSE	7
2022-09-15	12:24:40	0.736298	3.2752	477.189	FALSE	7
2022-09-15	12:24:40	0.73014	3.24781	450.721	FALSE	7
2022-09-15	12:24:40	0.728155	3.23898	480.428	FALSE	7
2022-09-15	12:24:41	0.728359	3.23989	453.961	FALSE	7
2022-09-15	12:24:41	0.72897	3.2426	483.671	FALSE	7
2022-09-15	12:24:41	0.733855	3.26433	457.225	FALSE	7
2022-09-15	12:24:41	0.731056	3.25188	486.923	FALSE	7
2022-09-15	12:24:42	0.736196	3.27475	460.5	FALSE	7
2022-09-15	12:24:42	0.732023	3.25618	490.179	FALSE	7
2022-09-15	12:24:42	0.730445	3.24917	463.749	FALSE	7
2022-09-15	12:24:42	0.723168	3.2168	493.396	FALSE	7
2022-09-15	12:24:43	0.73416	3.26569	467.015	FALSE	7
2022-09-15	12:24:43	0.736959	3.27814	496.674	FALSE	7
2022-09-15	12:24:43	0.735178	3.27022	470.285	FALSE	7
2022-09-15	12:24:43	0.729478	3.24486	499.919	FALSE	7
2022-09-15	12:24:44	0.729529	3.24509	473.53	FALSE	7
2022-09-15	12:24:44	0.735483	3.27158	503.19	FALSE	7
2022-09-15	12:24:44	0.739555	3.28969	476.82	FALSE	7
2022-09-15	12:24:45	0.738384	3.28448	506.475	FALSE	7
2022-09-15	12:24:45	0.725305	3.2263	480.046	FALSE	7
2022-09-15	12:24:45	0.732837	3.25981	509.735	FALSE	7
2022-09-15	12:24:45	0.731565	3.25415	483.301	FALSE	7
2022-09-15	12:24:46	0.737977	3.28267	513.017	FALSE	7
2022-09-15	12:24:46	0.734568	3.26751	486.568	FALSE	7
2022-09-15	12:24:46	0.732684	3.25912	516.277	FALSE	7
2022-09-15	12:24:46	0.731361	3.25324	489.821	FALSE	7
2022-09-15	12:24:47	0.734669	3.26795	519.545	FALSE	7
2022-09-15	12:24:47	0.729275	3.24396	493.065	FALSE	7
2022-09-15	12:24:47	0.731819	3.25528	522.8	FALSE	7
2022-09-15	12:24:47	0.72958	3.24532	496.311	FALSE	7
2022-09-15	12:24:48	0.738384	3.28448	526.084	FALSE	7
2022-09-15	12:24:48	0.727392	3.23559	499.546	FALSE	7
2022-09-15	12:24:48	0.734364	3.2666	529.351	FALSE	7
2022-09-15	12:24:49	0.729784	3.24623	502.792	FALSE	7
2022-09-15	12:24:49	0.731667	3.2546	532.605	FALSE	7
2022-09-15	12:24:49	0.727392	3.23559	506.028	FALSE	7
2022-09-15	12:24:49	0.731667	3.2546	535.86	FALSE	7
2022-09-15	12:24:50	0.734415	3.26682	509.295	FALSE	7
2022-09-15	12:24:50	0.731819	3.25528	539.115	FALSE	7
2022-09-15	12:24:50	0.734008	3.26501	512.56	FALSE	7
2022-09-15	12:24:50	0.734059	3.26524	542.381	FALSE	7
2022-09-15	12:24:51	0.731616	3.25437	515.814	FALSE	7
2022-09-15	12:24:51	0.727239	3.2349	545.616	FALSE	7
2022-09-15	12:24:51	0.731412	3.25347	519.068	FALSE	7
2022-09-15	12:24:51	0.731514	3.25392	548.869	FALSE	7
2022-09-15	12:24:52	0.731667	3.2546	522.322	FALSE	7
2022-09-15	12:24:52	0.732328	3.25754	552.127	FALSE	7
2022-09-15	12:24:52	0.734924	3.26909	525.591	FALSE	7
2022-09-15	12:24:53	0.734822	3.26864	555.396	FALSE	7
2022-09-15	12:24:53	0.732074	3.25641	528.848	FALSE	7
2022-09-15	12:24:53	0.727748	3.23717	558.633	FALSE	7
2022-09-15	12:24:53	0.730394	3.24894	532.097	FALSE	7
2022-09-15	12:24:54	0.728766	3.2417	561.874	FALSE	7
2022-09-15	12:24:54	0.730242	3.24826	535.345	FALSE	7
2022-09-15	12:24:54	0.730089	3.24758	565.122	FALSE	7
2022-09-15	12:24:54	0.728104	3.23875	538.584	FALSE	7
2022-09-15	12:24:55	0.726934	3.23355	568.356	FALSE	7
2022-09-15	12:24:55	0.732532	3.25845	541.842	FALSE	7
2022-09-15	12:24:55	0.73014	3.24781	571.603	FALSE	7
2022-09-15	12:24:55	0.732074	3.25641	545.099	FALSE	7
2022-09-15	12:24:56	0.734262	3.26614	574.87	FALSE	7
2022-09-15	12:24:56	0.737519	3.28063	548.379	FALSE	7
2022-09-15	12:24:56	0.730598	3.24985	578.119	FALSE	7
2022-09-15	12:24:57	0.734822	3.26864	551.648	FALSE	7
2022-09-15	12:24:57	0.729173	3.24351	581.363	FALSE	7
2022-09-15	12:24:57	0.732837	3.25981	554.908	FALSE	7
2022-09-15	12:24:57	0.730242	3.24826	584.611	FALSE	7
2022-09-15	12:24:58	0.732175	3.25686	558.164	FALSE	7
2022-09-15	12:24:58	0.727087	3.23423	587.845	FALSE	7
2022-09-15	12:24:58	0.731209	3.25256	561.417	FALSE	7
2022-09-15	12:24:58	0.724949	3.22472	591.07	FALSE	7
2022-09-15	12:24:59	0.731616	3.25437	564.671	FALSE	7
2022-09-15	12:24:59	0.735433	3.27135	594.341	FALSE	7
2022-09-15	12:24:59	0.73131	3.25301	567.924	FALSE	7
2022-09-15	12:24:59	0.733957	3.26479	597.606	FALSE	7
2022-09-15	12:25:00	0.729835	3.24645	571.171	FALSE	7
2022-09-15	12:25:00	0.736043	3.27407	600.88	FALSE	7
2022-09-15	12:25:00	0.737417	3.28018	574.451	FALSE	7
2022-09-15	12:25:01	0.735178	3.27022	604.151	FALSE	7
2022-09-15	12:25:01	0.728664	3.24124	577.692	FALSE	7
2022-09-15	12:25:01	0.732379	3.25777	607.408	FALSE	7
2022-09-15	12:25:01	0.732074	3.25641	580.949	FALSE	7
2022-09-15	12:25:02	0.741031	3.29625	610.705	FALSE	7
2022-09-15	12:25:02	0.727901	3.23785	584.187	FALSE	7
2022-09-15	12:25:02	0.729071	3.24305	613.948	FALSE	7
2022-09-15	12:25:02	0.728308	3.23966	587.426	FALSE	7
2022-09-15	12:25:03	0.728308	3.23966	617.187	FALSE	7
2022-09-15	12:25:03	0.72673	3.23264	590.659	FALSE	7
2022-09-15	12:25:03	0.728257	3.23943	620.427	FALSE	7
2022-09-15	12:25:03	0.730496	3.24939	593.908	FALSE	7
2022-09-15	12:25:04	0.736043	3.27407	623.701	FALSE	7
2022-09-15	12:25:04	0.73243	3.258	597.166	FALSE	7
2022-09-15	12:25:04	0.730394	3.24894	626.95	FALSE	7
2022-09-15	12:25:05	0.716349	3.18646	600.353	FALSE	7
2022-09-15	12:25:05	0.730751	3.25053	630.2	FALSE	7
2022-09-15	12:25:05	0.730089	3.24758	603.6	FALSE	7
2022-09-15	12:25:05	0.733957	3.26479	633.465	FALSE	7
2022-09-15	12:25:06	0.731412	3.25347	606.854	FALSE	7
2022-09-15	12:25:06	0.732634	3.2589	636.724	FALSE	7
2022-09-15	12:25:06	0.729987	3.24713	610.101	FALSE	7
2022-09-15	12:25:06	0.732023	3.25618	639.98	FALSE	7
2022-09-15	12:25:07	0.733346	3.26207	613.363	FALSE	7
2022-09-15	12:25:07	0.728562	3.24079	643.221	FALSE	7
2022-09-15	12:25:07	0.736552	3.27633	616.639	FALSE	7
2022-09-15	12:25:07	0.730547	3.24962	646.471	FALSE	7
2022-09-15	12:25:08	0.734618	3.26773	619.907	FALSE	7
2022-09-15	12:25:08	0.733448	3.26252	649.733	FALSE	7
2022-09-15	12:25:08	0.732023	3.25618	623.163	FALSE	7
2022-09-15	12:25:09	0.735534	3.2718	653.005	FALSE	7
2022-09-15	12:25:09	0.733397	3.2623	626.425	FALSE	7
2022-09-15	12:25:09	0.730903	3.2512	656.256	FALSE	7
2022-09-15	12:25:09	0.738028	3.2829	629.708	FALSE	7
2022-09-15	12:25:10	0.735789	3.27294	659.529	FALSE	7
2022-09-15	12:25:10	0.733499	3.26275	632.971	FALSE	7
2022-09-15	12:25:10	0.738079	3.28312	662.812	FALSE	7
2022-09-15	12:25:10	0.73645	3.27588	636.247	FALSE	7
2022-09-15	12:25:11	0.731717	3.25482	666.067	FALSE	7
2022-09-15	12:25:11	0.728715	3.24147	639.488	FALSE	7
2022-09-15	12:25:11	0.737214	3.27928	669.346	FALSE	7
2022-09-15	12:25:11	0.73472	3.26818	642.757	FALSE	7
2022-09-15	12:25:12	0.735483	3.27158	672.618	FALSE	7
2022-09-15	12:25:12	0.735229	3.27045	646.027	FALSE	7
2022-09-15	12:25:12	0.735738	3.27271	675.89	FALSE	7
2022-09-15	12:25:13	0.731259	3.25279	649.28	FALSE	7
2022-09-15	12:25:13	0.731565	3.25415	679.145	FALSE	7
2022-09-15	12:25:13	0.73187	3.2555	652.535	FALSE	7
2022-09-15	12:25:13	0.733142	3.26116	682.406	FALSE	7
2022-09-15	12:25:14	0.73874	3.28606	655.821	FALSE	7
2022-09-15	12:25:14	0.738588	3.28539	685.691	FALSE	7
2022-09-15	12:25:14	0.733041	3.26071	659.082	FALSE	7
2022-09-15	12:25:14	0.730598	3.24985	688.941	FALSE	7
2022-09-15	12:25:15	0.732837	3.25981	662.342	FALSE	7
2022-09-15	12:25:15	0.735585	3.27203	692.213	FALSE	7
2022-09-15	12:25:15	0.728613	3.24102	665.583	FALSE	7
2022-09-15	12:25:15	0.695687	3.09455	695.308	FALSE	7
2022-09-15	12:25:16	0.732735	3.25935	668.842	FALSE	7
2022-09-15	12:25:16	0.719249	3.19936	698.507	FALSE	7
2022-09-15	12:25:16	0.538588	2.39575	671.238	FALSE	7
2022-09-15	12:25:17	0.718333	3.19529	701.702	FALSE	7
2022-09-15	12:25:17	0.731768	3.25505	674.493	FALSE	7
2022-09-15	12:25:17	0.737722	3.28154	704.984	FALSE	7
2022-09-15	12:25:17	0.735382	3.27113	677.764	FALSE	7
2022-09-15	12:25:18	0.721743	3.21046	708.194	FALSE	7
2022-09-15	12:25:18	0.731565	3.25415	681.018	FALSE	7
2022-09-15	12:25:18	0.715992	3.18488	711.379	FALSE	7
2022-09-15	12:25:18	0.691005	3.07373	684.092	FALSE	7
2022-09-15	12:25:19	0.740929	3.2958	714.675	FALSE	7
2022-09-15	12:25:19	0.733346	3.26207	687.354	FALSE	7
2022-09-15	12:25:19	0.734211	3.26592	717.941	FALSE	7
2022-09-15	12:25:19	0.732328	3.25754	690.612	FALSE	7
2022-09-15	12:25:20	0.728562	3.24079	721.182	FALSE	7
2022-09-15	12:25:20	0.734211	3.26592	693.878	FALSE	7
2022-09-15	12:25:20	0.734008	3.26501	724.447	FALSE	7
2022-09-15	12:25:21	0.735789	3.27294	697.151	FALSE	7
2022-09-15	12:25:21	0.740064	3.29195	727.739	FALSE	7
2022-09-15	12:25:21	0.731158	3.25234	700.403	FALSE	7
2022-09-15	12:25:21	0.733855	3.26433	731.003	FALSE	7
2022-09-15	12:25:22	0.737468	3.28041	703.683	FALSE	7
2022-09-15	12:25:22	0.73701	3.27837	734.281	FALSE	7
2022-09-15	12:25:22	0.733906	3.26456	706.948	FALSE	7
2022-09-15	12:25:22	0.729733	3.246	737.527	FALSE	7
2022-09-15	12:25:23	0.735483	3.27158	710.219	FALSE	7
2022-09-15	12:25:23	0.732786	3.25958	740.787	FALSE	7
2022-09-15	12:25:23	0.737519	3.28063	713.5	FALSE	7
2022-09-15	12:25:23	0.731412	3.25347	744.04	FALSE	7
2022-09-15	12:25:24	0.740929	3.2958	716.796	FALSE	7
2022-09-15	12:25:24	0.727596	3.23649	747.277	FALSE	7
2022-09-15	12:25:24	0.73355	3.26298	720.059	FALSE	7
2022-09-15	12:25:25	0.736196	3.27475	750.552	FALSE	7
2022-09-15	12:25:25	0.734313	3.26637	723.325	FALSE	7
2022-09-15	12:25:25	0.734211	3.26592	753.818	FALSE	7
2022-09-15	12:25:25	0.733041	3.26071	726.586	FALSE	7
2022-09-15	12:25:26	0.736247	3.27497	757.092	FALSE	7
2022-09-15	12:25:26	0.727901	3.23785	729.824	FALSE	7
2022-09-15	12:25:26	0.736043	3.27407	760.367	FALSE	7
2022-09-15	12:25:26	0.731717	3.25482	733.079	FALSE	7
2022-09-15	12:25:27	0.729326	3.24419	763.611	FALSE	7
2022-09-15	12:25:27	0.737214	3.27928	736.358	FALSE	7
2022-09-15	12:25:27	0.730242	3.24826	766.859	FALSE	7
2022-09-15	12:25:27	0.730089	3.24758	739.606	FALSE	7
2022-09-15	12:25:28	0.728664	3.24124	770.1	FALSE	7
2022-09-15	12:25:28	0.732125	3.25664	742.862	FALSE	7
2022-09-15	12:25:28	0.730547	3.24962	773.35	FALSE	7
2022-09-15	12:25:29	0.73472	3.26818	746.13	FALSE	7
2022-09-15	12:25:29	0.733295	3.26184	776.612	FALSE	7
2022-09-15	12:25:29	0.73299	3.26049	749.391	FALSE	7
2022-09-15	12:25:29	0.734262	3.26614	779.878	FALSE	7
2022-09-15	12:25:30	0.726883	3.23332	752.624	FALSE	7
2022-09-15	12:25:30	0.733906	3.26456	783.142	FALSE	7
2022-09-15	12:25:30	0.735636	3.27226	755.896	FALSE	7
2022-09-15	12:25:30	0.732023	3.25618	786.399	FALSE	7
2022-09-15	12:25:31	0.735687	3.27248	759.169	FALSE	7
2022-09-15	12:25:31	0.733651	3.26343	789.662	FALSE	7
2022-09-15	12:25:31	0.728257	3.23943	762.408	FALSE	7
2022-09-15	12:25:31	0.730089	3.24758	792.91	FALSE	7
2022-09-15	12:25:32	0.730293	3.24849	765.657	FALSE	7
2022-09-15	12:25:32	1.36373	6.06614	798.976	FALSE	7
2022-09-15	12:25:32	0.728613	3.24102	768.898	FALSE	7
2022-09-15	12:25:33	0.728562	3.24079	802.217	FALSE	7
2022-09-15	12:25:33	0.724847	3.22426	772.122	FALSE	7
2022-09-15	12:25:33	0.724746	3.22382	805.44	FALSE	7
2022-09-15	12:25:33	0.73131	3.25301	775.375	FALSE	7
2022-09-15	12:25:34	0.733397	3.2623	808.703	FALSE	7
2022-09-15	12:25:34	0.72958	3.24532	778.62	FALSE	7
2022-09-15	12:25:34	0.725763	3.22834	811.931	FALSE	7
2022-09-15	12:25:34	0.735026	3.26954	781.89	FALSE	7
2022-09-15	12:25:35	0.726985	3.23377	815.165	FALSE	7
2022-09-15	12:25:35	0.733804	3.26411	785.154	FALSE	7
2022-09-15	12:25:35	0.734313	3.26637	818.431	FALSE	7
2022-09-15	12:25:35	0.728562	3.24079	788.395	FALSE	7
2022-09-15	12:25:36	0.73584	3.27316	821.704	FALSE	7
2022-09-15	12:25:36	0.728054	3.23853	791.633	FALSE	7
2022-09-15	12:25:36	0.73243	3.258	824.962	FALSE	7
2022-09-15	12:25:37	0.725254	3.22607	794.859	FALSE	7
2022-09-15	12:25:37	0.729631	3.24554	828.208	FALSE	7
2022-09-15	12:25:37	0.72958	3.24532	798.105	FALSE	7
2022-09-15	12:25:37	0.731209	3.25256	831.46	FALSE	7
2022-09-15	12:25:38	2.19212	9.75099	807.856	FALSE	7
2022-09-15	12:25:38	0.736298	3.2752	834.736	FALSE	7
2022-09-15	12:25:38	0.729071	3.24305	811.099	FALSE	7
2022-09-15	12:25:38	0.946221	4.20898	838.945	FALSE	7
2022-09-15	12:25:39	0.901438	4.00978	815.109	FALSE	7
2022-09-15	12:25:39	0.731667	3.2546	842.199	FALSE	7
2022-09-15	12:25:39	0.740216	3.29263	818.401	FALSE	7
2022-09-15	12:25:39	1.51172	6.72443	848.924	FALSE	7
2022-09-15	12:25:40	0.730801	3.25075	821.652	FALSE	7
2022-09-15	12:25:40	0.730445	3.24917	852.173	FALSE	7
2022-09-15	12:25:40	0.896348	3.98714	825.639	FALSE	7
2022-09-15	12:25:41	0.736501	3.2761	855.449	FALSE	7
2022-09-15	12:25:41	0.727748	3.23717	828.876	FALSE	7
2022-09-15	12:25:41	0.73416	3.26569	858.715	FALSE	7
2022-09-15	12:25:41	0.862099	3.83479	832.711	FALSE	7
2022-09-15	12:25:42	2.32836	10.357	869.072	FALSE	7
2022-09-15	12:25:42	2.43085	10.8129	843.524	FALSE	7
2022-09-15	12:25:42	2.73828	12.1804	881.252	FALSE	7
2022-09-15	12:25:42	2.02312	8.99924	852.523	FALSE	7
2022-09-15	12:25:43	3.51284	15.6258	896.878	1	8
2022-09-15	12:25:43	1.74144	7.74627	860.269	FALSE	8
2022-09-15	12:25:43	1.9764	8.79142	905.669	FALSE	8
2022-09-15	12:25:43	0.866679	3.85516	864.125	FALSE	8
2022-09-15	12:25:44	0.728919	3.24238	908.912	FALSE	8
2022-09-15	12:25:44	0.73757	3.28086	867.406	FALSE	8
2022-09-15	12:25:44	0.738486	3.28493	912.197	FALSE	8
2022-09-15	12:25:45	0.732583	3.25868	870.664	FALSE	8
2022-09-15	12:25:45	0.735891	3.27339	915.47	FALSE	8
2022-09-15	12:25:45	4.19507	18.6605	889.325	1	9
2022-09-15	12:25:45	0.800013	3.55862	919.029	FALSE	9
2022-09-15	12:25:46	1.40775	6.26195	895.587	FALSE	9
2022-09-15	12:25:46	1.09996	4.89284	923.921	FALSE	9
2022-09-15	12:25:46	1.85197	8.23793	903.825	FALSE	9
2022-09-15	12:25:46	1.28922	5.73471	929.656	FALSE	9
2022-09-15	12:25:47	1.18581	5.27472	909.099	FALSE	9
2022-09-15	12:25:47	0.763931	3.39812	933.054	FALSE	9
2022-09-15	12:25:47	0.731717	3.25482	912.354	FALSE	9
2022-09-15	12:25:47	0.72897	3.2426	936.297	FALSE	9
2022-09-15	12:25:48	0.813041	3.61657	915.971	FALSE	9
2022-09-15	12:25:48	0.442252	1.96723	938.264	FALSE	9
2022-09-15	12:25:48	0.711514	3.16496	919.136	FALSE	9
2022-09-15	12:25:49	0.743982	3.30938	941.573	FALSE	9
2022-09-15	12:25:49	0.365407	1.6254	920.761	FALSE	9
2022-09-15	12:25:49	0.962201	4.28006	945.854	FALSE	9
2022-09-15	12:25:49	0.307443	1.36757	922.129	FALSE	9
2022-09-15	12:25:50	0.0234735	0.104415	945.958	FALSE	9
2022-09-15	12:25:50	0.664033	2.95375	925.082	FALSE	9
2022-09-15	12:25:50	0.73813	3.28335	949.241	FALSE	9
2022-09-15	12:25:50	0.732532	3.25845	928.341	FALSE	9
2022-09-15	12:25:51	0.729173	3.24351	952.485	FALSE	9
2022-09-15	12:25:51	0.712532	3.16948	931.51	FALSE	9
2022-09-15	12:25:51	0.608359	2.7061	955.191	FALSE	9
2022-09-15	12:25:51	0.189377	0.842387	932.353	FALSE	9
2022-09-15	12:25:52	-0.0198344	-0.0882274	955.191	FALSE	9
2022-09-15	12:25:52	-0.107417	-0.477812	932.353	FALSE	9
2022-09-15	12:25:52	0.0074939	0.0333344	955.224	FALSE	9
2022-09-15	12:25:53	-0.113269	-0.503843	932.353	FALSE	9
2022-09-15	12:25:53	-0.0533712	-0.237406	955.224	FALSE	9
2022-09-15	12:25:53	0.0684099	0.304301	932.657	FALSE	9
2022-09-15	12:25:53	0.320166	1.42416	956.648	FALSE	9
2022-09-15	12:25:54	0.364491	1.62133	934.278	FALSE	9
2022-09-15	12:25:54	0.283779	1.26231	957.911	FALSE	9
2022-09-15	12:25:54	0.271718	1.20866	935.487	FALSE	9
2022-09-15	12:25:54	0.330038	1.46808	959.379	FALSE	9
2022-09-15	12:25:55	0.663779	2.95262	938.44	FALSE	9
2022-09-15	12:25:55	0.443321	1.97198	961.351	FALSE	9
2022-09-15	12:25:55	0.720165	3.20344	941.643	FALSE	9
2022-09-15	12:25:55	0.470344	2.09218	963.443	FALSE	9
2022-09-15	12:25:56	0.461285	2.05189	943.695	FALSE	9
2022-09-15	12:25:56	0.475992	2.11731	965.56	FALSE	9
2022-09-15	12:25:56	0.44388	1.97447	945.669	FALSE	9
2022-09-15	12:25:57	0.452227	2.0116	967.572	FALSE	9
2022-09-15	12:25:57	0.431769	1.92059	947.59	FALSE	9
2022-09-15	12:25:57	0.442048	1.96632	969.538	FALSE	9
2022-09-15	12:25:57	0.437265	1.94504	949.535	FALSE	9
2022-09-15	12:25:58	0.451056	2.00639	971.545	FALSE	9
2022-09-15	12:25:58	0.454669	2.02246	951.557	FALSE	9
2022-09-15	12:25:58	0.456654	2.03129	973.576	FALSE	9
2022-09-15	12:25:58	0.462965	2.05936	953.617	FALSE	9
2022-09-15	12:25:59	0.465458	2.07045	975.646	FALSE	9
2022-09-15	12:25:59	0.45645	2.03038	955.647	FALSE	9
2022-09-15	12:25:59	0.459657	2.04465	977.691	FALSE	9
2022-09-15	12:25:59	0.462099	2.05551	957.703	FALSE	9
2022-09-15	12:26:00	0.457417	2.03468	979.726	FALSE	9
2022-09-15	12:26:00	0.453346	2.01657	959.719	FALSE	9
2022-09-15	12:26:00	0.431056	1.91742	981.643	FALSE	9
2022-09-15	12:26:01	0.405814	1.80514	961.524	FALSE	9
2022-09-15	12:26:01	0.394313	1.75398	983.397	FALSE	9
2022-09-15	12:26:01	0.394059	1.75285	963.277	FALSE	9
2022-09-15	12:26:01	0.392074	1.74402	985.141	FALSE	9
2022-09-15	12:26:02	0.392532	1.74606	965.023	FALSE	9
2022-09-15	12:26:02	0.394262	1.75376	986.895	FALSE	9
2022-09-15	12:26:02	0.396298	1.76281	966.786	FALSE	9
2022-09-15	12:26:02	0.399962	1.77911	988.674	FALSE	9
2022-09-15	12:26:03	0.412023	1.83276	968.619	FALSE	9
2022-09-15	12:26:03	0.405051	1.80175	990.476	FALSE	9
2022-09-15	12:26:03	0.410598	1.82642	970.445	FALSE	9
2022-09-15	12:26:04	0.418486	1.86151	992.337	FALSE	9
2022-09-15	12:26:04	0.420776	1.8717	972.317	FALSE	9
2022-09-15	12:26:04	0.423982	1.88596	994.223	FALSE	9
2022-09-15	12:26:04	0.424491	1.88822	974.205	FALSE	9
2022-09-15	12:26:05	0.432685	1.92467	996.148	FALSE	9
2022-09-15	12:26:05	0.428868	1.90769	976.113	FALSE	9
2022-09-15	12:26:05	0.426374	1.8966	998.044	FALSE	9
2022-09-15	12:26:05	0.447494	1.99054	978.104	FALSE	9
2022-09-15	12:26:06	0.478486	2.1284	1000.17	FALSE	9
2022-09-15	12:26:06	0.434211	1.93146	980.035	FALSE	9
2022-09-15	12:26:06	0.426171	1.89569	1002.07	FALSE	9
2022-09-15	12:26:06	0.363524	1.61703	981.652	FALSE	9
2022-09-15	12:26:07	0.380267	1.6915	1003.76	FALSE	9
2022-09-15	12:26:07	0.378181	1.68222	983.334	FALSE	9
2022-09-15	12:26:07	0.404542	1.79948	1005.56	FALSE	9
2022-09-15	12:26:07	0.346069	1.53938	984.874	FALSE	9
2022-09-15	12:26:08	0.314466	1.39881	1006.96	FALSE	9
2022-09-15	12:26:08	0.310344	1.38047	986.254	FALSE	9
2022-09-15	12:26:08	0.322405	1.43412	1008.39	FALSE	9
2022-09-15	12:26:09	0.342863	1.52512	987.779	FALSE	9
2022-09-15	12:26:09	0.332074	1.47713	1009.87	FALSE	9
2022-09-15	12:26:09	0.317824	1.41374	989.193	FALSE	9
2022-09-15	12:26:09	0.31299	1.39224	1011.26	FALSE	9
2022-09-15	12:26:10	0.291107	1.2949	990.488	FALSE	9
2022-09-15	12:26:10	0.281489	1.25212	1012.51	FALSE	9
2022-09-15	12:26:10	0.288715	1.28426	991.772	FALSE	9
2022-09-15	12:26:10	0.272939	1.21409	1013.73	FALSE	9
2022-09-15	12:26:11	0.280064	1.24578	993.018	FALSE	9
2022-09-15	12:26:11	0.27757	1.23469	1014.96	FALSE	9
2022-09-15	12:26:11	0.28215	1.25506	994.273	FALSE	9
2022-09-15	12:26:11	0.286628	1.27498	1016.24	FALSE	9
2022-09-15	12:26:12	0.285611	1.27045	995.543	FALSE	9
2022-09-15	12:26:12	0.290802	1.29355	1017.53	FALSE	9
2022-09-15	12:26:12	0.300064	1.33474	996.878	FALSE	9
2022-09-15	12:26:13	0.328664	1.46196	1018.99	FALSE	9
2022-09-15	12:26:13	0.416349	1.852	998.73	FALSE	9
2022-09-15	12:26:13	0.434313	1.93191	1020.93	FALSE	9
2022-09-15	12:26:13	0.383422	1.70554	1000.44	FALSE	9
2022-09-15	12:26:14	0.184237	0.819523	1021.74	FALSE	9
2022-09-15	12:26:14	-0.002786	-0.0123927	1000.44	FALSE	9
2022-09-15	12:26:14	-0.192964	-0.858342	1021.74	FALSE	9
2022-09-15	12:26:14	-0.0983076	-0.437292	1000.44	FALSE	9
2022-09-15	12:26:15	-0.182888	-0.813522	1021.74	FALSE	9
2022-09-15	12:26:15	-0.224109	-0.996882	1000.44	FALSE	9
2022-09-15	12:26:15	-0.938816	-4.17604	1021.74	FALSE	9
2022-09-15	12:26:15	-0.473218	-2.10497	1000.44	FALSE	9
2022-09-15	12:26:16	-0.544872	-2.4237	1021.74	FALSE	9
2022-09-15	12:26:16	-0.93047	-4.13892	1000.44	FALSE	9
2022-09-15	12:26:16	-1.33953	-5.9585	1021.74	FALSE	9
2022-09-15	12:26:17	-1.14472	-5.09194	1000.44	FALSE	9
2022-09-15	12:26:17	-1.23469	-5.49215	1021.74	FALSE	9
2022-09-15	12:26:17	-1.06452	-4.7352	1000.44	FALSE	9
2022-09-15	12:26:17	-1.29647	-5.76696	1021.74	FALSE	9
2022-09-15	12:26:18	-1.26009	-5.60513	1000.44	FALSE	9
2022-09-15	12:26:18	-0.749961	-3.33598	1021.74	FALSE	9
2022-09-15	12:26:18	-0.700852	-3.11753	1000.44	FALSE	9
2022-09-15	12:26:18	-0.591946	-2.63309	1021.74	FALSE	9
2022-09-15	12:26:19	-0.633015	-2.81578	1000.44	FALSE	9
2022-09-15	12:26:19	-0.503193	-2.2383	1021.74	FALSE	9
2022-09-15	12:26:19	-0.357798	-1.59156	1000.44	FALSE	9
2022-09-15	12:26:19	-0.33276	-1.48018	1021.74	FALSE	9
2022-09-15	12:26:20	-0.0280786	-0.124899	1000.44	FALSE	9
2022-09-15	12:26:20	-0.0772898	-0.3438	1021.74	FALSE	9
2022-09-15	12:26:20	0.346985	1.54346	1001.98	FALSE	9
2022-09-15	12:26:21	0.21925	0.975268	1022.72	FALSE	9
2022-09-15	12:26:21	0.606832	2.69931	1004.68	FALSE	9
2022-09-15	12:26:21	0.576196	2.56304	1025.28	FALSE	9
2022-09-15	12:26:21	0.494313	2.1988	1006.88	FALSE	9
2022-09-15	12:26:22	0.510343	2.27011	1027.55	FALSE	9
2022-09-15	12:26:22	0.516399	2.29705	1009.17	FALSE	9
2022-09-15	12:26:22	0.796501	3.543	1031.1	FALSE	9
2022-09-15	12:26:22	5.58088	24.8249	1034	1	10
2022-09-15	12:26:23	1.24184	5.52395	1036.62	FALSE	10
2022-09-15	12:26:23	1.4594	6.4917	1040.49	FALSE	10
2022-09-15	12:26:23	0.885254	3.93779	1040.56	FALSE	10
2022-09-15	12:26:23	0.308104	1.37051	1041.86	FALSE	10
2022-09-15	12:26:24	0.19014	0.845781	1041.4	FALSE	10
2022-09-15	12:26:24	0.379351	1.68743	1043.55	FALSE	10
2022-09-15	12:26:24	0.39243	1.74561	1043.15	FALSE	10
2022-09-15	12:26:25	1.36184	6.05774	1049.61	FALSE	10
2022-09-15	12:26:25	4.30663	19.1568	1062.31	1	11
2022-09-15	12:26:25	4.36678	19.4243	1069.03	1	12
2022-09-15	12:26:25	0.957621	4.25969	1066.57	FALSE	12
2022-09-15	12:26:26	0.22444	0.998354	1070.03	FALSE	12
2022-09-15	12:26:26	0.298181	1.32637	1067.89	FALSE	12
2022-09-15	12:26:26	0.326527	1.45246	1071.48	FALSE	12
2022-09-15	12:26:26	0.197061	0.876567	1068.77	FALSE	12
2022-09-15	12:26:27	0.249631	1.11041	1072.59	FALSE	12
2022-09-15	12:26:27	0.00983486	0.0437474	1068.81	FALSE	12
2022-09-15	12:26:27	0.155535	0.691851	1073.28	FALSE	12
2022-09-15	12:26:28	-0.0853814	-0.379794	1068.81	FALSE	12
2022-09-15	12:26:28	0.213804	0.951043	1074.23	FALSE	12
2022-09-15	12:26:28	0.220267	0.979792	1069.79	FALSE	12
2022-09-15	12:26:28	0.601692	2.67645	1076.91	FALSE	12
2022-09-15	12:26:29	0.594466	2.6443	1072.44	FALSE	12
2022-09-15	12:26:29	0.705407	3.13779	1080.05	FALSE	12
2022-09-15	12:26:29	6.41848	28.5507	1100.99	1	13
2022-09-15	12:26:29	8.37273	37.2436	1117.29	1	14
2022-09-15	12:26:30	3.32739	14.8009	1115.79	1	15
2022-09-15	12:26:30	1.50866	6.71082	1124	FALSE	15
2022-09-15	12:26:30	0.512176	2.27826	1118.07	FALSE	15
2022-09-15	12:26:30	0.949428	4.22325	1128.23	FALSE	15
2022-09-15	12:26:31	1.41788	6.30701	1124.37	FALSE	15
2022-09-15	12:26:31	2.31518	10.2984	1138.53	FALSE	15
2022-09-15	12:26:31	5.65441	25.1519	1149.53	1	16
2022-09-15	12:26:31	2.75197	12.2413	1150.77	FALSE	16
2022-09-15	12:26:32	1.61798	7.1971	1156.72	FALSE	16
2022-09-15	12:26:32	0.667697	2.97005	1153.74	FALSE	16
2022-09-15	12:26:32	0.748766	3.33066	1160.05	FALSE	16
2022-09-15	12:26:33	0.648104	2.8829	1156.62	FALSE	16
2022-09-15	12:26:33	0.491361	2.18567	1162.24	FALSE	16
2022-09-15	12:26:33	0.584847	2.60152	1159.22	FALSE	16
2022-09-15	12:26:33	0.459504	2.04397	1164.28	FALSE	16
2022-09-15	12:26:34	0.61701	2.74458	1161.97	FALSE	16
2022-09-15	12:26:34	0.408512	1.81714	1166.1	FALSE	16
2022-09-15	12:26:34	0.621743	2.76564	1164.73	FALSE	16
2022-09-15	12:26:34	0.38785	1.72523	1167.82	FALSE	16
2022-09-15	12:26:35	0.665051	2.95828	1167.69	FALSE	16
2022-09-15	12:26:35	0.352226	1.56677	1169.39	FALSE	16
2022-09-15	12:26:35	0.554975	2.46864	1170.16	FALSE	16
2022-09-15	12:26:35	0.377214	1.67792	1171.07	FALSE	16
2022-09-15	12:26:36	0.580318	2.58137	1172.74	FALSE	16
2022-09-15	12:26:36	0.473499	2.10622	1173.18	FALSE	16
2022-09-15	12:26:36	0.554211	2.46524	1175.2	FALSE	16
2022-09-15	12:26:37	0.490293	2.18092	1175.36	FALSE	16
2022-09-15	12:26:37	0.534924	2.37945	1177.58	FALSE	16
2022-09-15	12:26:37	0.48612	2.16236	1177.52	FALSE	16
2022-09-15	12:26:37	0.51813	2.30475	1179.89	FALSE	16
2022-09-15	12:26:38	0.540063	2.40231	1179.92	FALSE	16
2022-09-15	12:26:38	0.476501	2.11957	1182.01	FALSE	16
2022-09-15	12:26:38	0.51472	2.28958	1182.21	FALSE	16
2022-09-15	12:26:38	0.547952	2.4374	1184.45	FALSE	16
2022-09-15	12:26:39	0.55355	2.4623	1184.67	FALSE	16
2022-09-15	12:26:39	0.488359	2.17232	1186.62	FALSE	16
2022-09-15	12:26:39	0.505509	2.24861	1186.92	FALSE	16
2022-09-15	12:26:39	0.51472	2.28958	1188.91	FALSE	16
2022-09-15	12:26:40	0.547086	2.43355	1189.36	FALSE	16
2022-09-15	12:26:40	0.524644	2.33372	1191.24	FALSE	16
2022-09-15	12:26:40	0.503677	2.24046	1191.6	FALSE	16
2022-09-15	12:26:41	0.503219	2.23842	1193.48	FALSE	16
2022-09-15	12:26:41	0.555382	2.47045	1194.07	FALSE	16
2022-09-15	12:26:41	0.482405	2.14583	1195.63	FALSE	16
2022-09-15	12:26:41	0.531209	2.36292	1196.43	FALSE	16
2022-09-15	12:26:42	0.514517	2.28867	1197.91	FALSE	16
2022-09-15	12:26:42	0.561336	2.49693	1198.93	FALSE	16
2022-09-15	12:26:42	0.517723	2.30294	1200.22	FALSE	16
2022-09-15	12:26:42	0.495993	2.20628	1201.13	FALSE	16
2022-09-15	12:26:43	0.505713	2.24951	1202.47	FALSE	16
2022-09-15	12:26:43	0.53528	2.38103	1203.51	FALSE	16
2022-09-15	12:26:43	0.504491	2.24408	1204.71	FALSE	16
2022-09-15	12:26:43	0.519046	2.30882	1205.82	FALSE	16
2022-09-15	12:26:44	0.500063	2.22438	1206.94	FALSE	16
2022-09-15	12:26:44	0.608206	2.70542	1208.53	FALSE	16
2022-09-15	12:26:44	0.388104	1.72636	1208.66	FALSE	16
2022-09-15	12:26:45	0.550954	2.45075	1210.98	FALSE	16
2022-09-15	12:26:45	0.403677	1.79564	1210.46	FALSE	16
2022-09-15	12:26:45	0.592837	2.63706	1213.62	FALSE	16
2022-09-15	12:26:45	0.422252	1.87826	1212.34	FALSE	16
2022-09-15	12:26:46	0.511667	2.276	1215.89	FALSE	16
2022-09-15	12:26:46	0.459453	2.04374	1214.38	FALSE	16
2022-09-15	12:26:46	0.629885	2.80185	1218.69	FALSE	16
2022-09-15	12:26:46	0.544186	2.42065	1216.8	FALSE	16
2022-09-15	12:26:47	0.346272	1.54029	1220.23	FALSE	16
2022-09-15	12:26:47	0.124797	0.555122	1217.36	FALSE	16
2022-09-15	12:26:47	-0.186552	-0.829821	1220.23	FALSE	16
2022-09-15	12:26:47	0.0119723	0.0532552	1217.41	FALSE	16
2022-09-15	12:26:48	-0.0994781	-0.442498	1220.23	FALSE	16
2022-09-15	12:26:48	0.0794022	0.353197	1217.76	FALSE	16
2022-09-15	12:26:48	-0.152455	-0.67815	1220.23	FALSE	16
2022-09-15	12:26:49	-0.0899106	-0.39994	1217.76	FALSE	16
2022-09-15	12:26:49	-0.222328	-0.988959	1220.23	FALSE	16
2022-09-15	12:26:49	-0.224364	-0.998016	1217.76	FALSE	16
2022-09-15	12:26:49	-0.417493	-1.85709	1220.23	FALSE	16
2022-09-15	12:26:50	-0.357493	-1.5902	1217.76	FALSE	16
2022-09-15	12:26:50	-0.350877	-1.56077	1220.23	FALSE	16
2022-09-15	12:26:50	-0.288638	-1.28392	1217.76	FALSE	16
2022-09-15	12:26:50	-0.302023	-1.34346	1220.23	FALSE	16
2022-09-15	12:26:51	-0.167773	-0.746288	1217.76	FALSE	16
2022-09-15	12:26:51	-0.204007	-0.907464	1220.23	FALSE	16
2022-09-15	12:26:51	-0.225839	-1.00458	1217.76	FALSE	16
2022-09-15	12:26:51	-0.300292	-1.33576	1220.23	FALSE	16
2022-09-15	12:26:52	-0.149656	-0.6657	1217.76	FALSE	16
2022-09-15	12:26:52	-0.211081	-0.938931	1220.23	FALSE	16
2022-09-15	12:26:52	-0.156628	-0.696713	1217.76	FALSE	16
2022-09-15	12:26:53	-0.217392	-0.967003	1220.23	FALSE	16
2022-09-15	12:26:53	-0.111539	-0.496148	1217.76	FALSE	16
2022-09-15	12:26:53	-0.129503	-0.576055	1220.23	FALSE	16
2022-09-15	12:26:53	-0.0426333	-0.189641	1217.76	FALSE	16
2022-09-15	12:26:54	-0.147163	-0.65461	1220.23	FALSE	16
2022-09-15	12:26:54	-0.0571371	-0.254157	1217.76	FALSE	16
2022-09-15	12:26:54	-0.135356	-0.602091	1220.23	FALSE	16
2022-09-15	12:26:54	0.108766	0.483813	1218.25	FALSE	16
2022-09-15	12:26:55	-0.0723534	-0.321842	1220.23	FALSE	16
2022-09-15	12:26:55	0.182354	0.811147	1219.06	FALSE	16
2022-09-15	12:26:55	-0.055356	-0.246235	1220.23	FALSE	16
2022-09-15	12:26:55	0.0385371	0.171421	1219.23	FALSE	16
2022-09-15	12:26:56	0.033957	0.151048	1220.38	FALSE	16
2022-09-15	12:26:56	0.0138552	0.0616307	1219.29	FALSE	16
2022-09-15	12:26:56	0.0937534	0.417034	1220.8	FALSE	16
2022-09-15	12:26:57	0.0810307	0.360441	1219.65	FALSE	16
2022-09-15	12:26:57	0.11528	0.512788	1221.31	FALSE	16
2022-09-15	12:26:57	0.0428628	0.190662	1219.84	FALSE	16
2022-09-15	12:26:57	0.16841	0.749121	1222.06	FALSE	16
2022-09-15	12:26:58	0.0706491	0.314261	1220.15	FALSE	16
2022-09-15	12:26:58	0.0438806	0.19519	1222.26	FALSE	16
2022-09-15	12:26:58	-0.145178	-0.645781	1220.15	FALSE	16
2022-09-15	12:26:58	-0.136832	-0.608656	1222.26	FALSE	16
2022-09-15	12:26:59	-0.157493	-0.70056	1220.15	FALSE	16
2022-09-15	12:26:59	0.663422	2.95103	1225.21	FALSE	16
2022-09-15	12:26:59	1.642	7.30394	1227.46	FALSE	16
2022-09-15	12:26:59	0.548359	2.43921	1227.65	FALSE	16
2022-09-15	12:27:00	0.365814	1.62721	1229.09	FALSE	16
2022-09-15	12:27:00	0.534008	2.37537	1230.02	FALSE	16
2022-09-15	12:27:00	0.109529	0.487207	1229.57	FALSE	16
2022-09-15	12:27:01	0.4707	2.09377	1232.12	FALSE	16
2022-09-15	12:27:01	0.751107	3.34107	1232.91	FALSE	16
2022-09-15	12:27:01	2.02032	8.98679	1241.11	FALSE	16
2022-09-15	12:27:01	0.0750257	0.333729	1233.25	FALSE	16
2022-09-15	12:27:02	-0.0151524	-0.0674009	1241.11	FALSE	16
2022-09-15	12:27:02	-0.108689	-0.48347	1233.25	FALSE	16
2022-09-15	12:27:02	-0.123804	-0.550705	1241.11	FALSE	16
2022-09-15	12:27:02	-0.255712	-1.13746	1233.25	FALSE	16
2022-09-15	12:27:03	-0.0623789	-0.277474	1241.11	FALSE	16
2022-09-15	12:27:03	-0.116476	-0.518109	1233.25	FALSE	16
2022-09-15	12:27:03	-0.121208	-0.539157	1241.11	FALSE	16
2022-09-15	12:27:03	-0.240649	-1.07045	1233.25	FALSE	16
2022-09-15	12:27:04	-0.102328	-0.455175	1241.11	FALSE	16
2022-09-15	12:27:04	-0.147519	-0.656194	1233.25	FALSE	16
2022-09-15	12:27:04	-0.0879259	-0.391112	1241.11	FALSE	16
2022-09-15	12:27:05	-0.144364	-0.64216	1233.25	FALSE	16
2022-09-15	12:27:05	0.0208781	0.09287	1241.2	FALSE	16
2022-09-15	12:27:05	0.0597076	0.265591	1233.51	FALSE	16
2022-09-15	12:27:05	0.102252	0.454837	1241.65	FALSE	16
2022-09-15	12:27:06	0.193295	0.859815	1234.37	FALSE	16
2022-09-15	12:27:06	0.126222	0.561461	1242.21	FALSE	16
2022-09-15	12:27:06	0.293143	1.30396	1235.68	FALSE	16
2022-09-15	12:27:06	0.295942	1.31641	1243.53	FALSE	16
2022-09-15	12:27:07	0.696654	3.09886	1238.78	FALSE	16
2022-09-15	12:27:07	1.18093	5.25301	1248.78	FALSE	16
2022-09-15	12:27:07	1.71431	7.62559	1246.4	FALSE	16
2022-09-15	12:27:07	0.819046	3.64328	1252.43	FALSE	16
2022-09-15	12:27:08	0.729478	3.24486	1249.65	FALSE	16
2022-09-15	12:27:08	0.294262	1.30894	1253.74	FALSE	16
2022-09-15	12:27:08	0.485255	2.15851	1251.81	FALSE	16
2022-09-15	12:27:09	0.473652	2.1069	1255.84	FALSE	16
2022-09-15	12:27:09	0.503371	2.23909	1254.04	FALSE	16
2022-09-15	12:27:09	1.10439	4.91255	1260.76	FALSE	16
2022-09-15	12:27:09	2.03813	9.06601	1263.11	FALSE	16
2022-09-15	12:27:10	1.63859	7.28878	1268.04	FALSE	16
2022-09-15	12:27:10	1.25752	5.5937	1268.7	FALSE	16
2022-09-15	12:27:10	1.78826	7.95454	1276	FALSE	16
2022-09-15	12:27:10	1.7448	7.76122	1276.47	FALSE	16
2022-09-15	12:27:11	1.52902	6.80139	1282.8	FALSE	16
2022-09-15	12:27:11	3.23569	14.393	1290.86	1	17
2022-09-15	12:27:11	2.62708	11.6858	1294.49	FALSE	17
2022-09-15	12:27:11	1.70174	7.56968	1298.43	FALSE	17
2022-09-15	12:27:12	0.656552	2.92047	1297.41	FALSE	17
2022-09-15	12:27:12	0.934924	4.15873	1302.59	FALSE	17
2022-09-15	12:27:12	1.42108	6.32125	1303.73	FALSE	17
2022-09-15	12:27:13	2.20683	9.81642	1312.4	FALSE	17
2022-09-15	12:27:13	3.49681	15.5545	1319.28	1	18
2022-09-15	12:27:13	3.16719	14.0883	1326.49	1	19
2022-09-15	12:27:13	4.98362	22.1681	1341.45	1	20
2022-09-15	12:27:14	3.69075	16.4172	1342.91	1	21
2022-09-15	12:27:14	4.74658	21.1137	1362.56	1	22
2022-09-15	12:27:14	3.58826	15.9613	1358.87	1	23
2022-09-15	12:27:14	5.50993	24.5093	1387.07	1	24
2022-09-15	12:27:15	1.76378	7.84565	1366.72	FALSE	24
2022-09-15	12:27:15	3.13955	13.9653	1401.04	1	25
2022-09-15	12:27:15	3.03838	13.5153	1380.23	1	26
2022-09-15	12:27:15	3.25355	14.4724	1415.51	1	27
2022-09-15	12:27:16	2.54887	11.3379	1391.57	FALSE	27
2022-09-15	12:27:16	3.39645	15.1081	1430.62	1	28
2022-09-15	12:27:16	3.64897	16.2313	1407.8	1	29
2022-09-15	12:27:17	2.96118	13.1719	1443.79	FALSE	29
2022-09-15	12:27:17	1.85141	8.23544	1416.04	FALSE	29
2022-09-15	12:27:17	2.76332	12.2918	1456.08	FALSE	29
2022-09-15	12:27:17	4.64836	20.6768	1436.71	1	30
2022-09-15	12:27:18	6.2854	27.9587	1484.04	1	31
2022-09-15	12:27:18	6.77166	30.1217	1466.83	1	32
2022-09-15	12:27:18	6.35752	28.2795	1512.32	1	33
2022-09-15	12:27:18	6.83136	30.3873	1497.22	1	34
2022-09-15	12:27:19	6.35991	28.2902	1540.61	1	35
2022-09-15	12:27:19	2.00775	8.93087	1506.15	FALSE	35
2022-09-15	12:27:19	1.90653	8.48063	1549.09	FALSE	35
2022-09-15	12:27:19	0.759962	3.38046	1509.53	FALSE	35
2022-09-15	12:27:20	1.19752	5.32681	1554.42	FALSE	35
2022-09-15	12:27:20	2.19966	9.78453	1519.32	FALSE	35
2022-09-15	12:27:20	2.88602	12.8376	1567.26	FALSE	35
2022-09-15	12:27:21	1.08561	4.82901	1524.15	FALSE	35
2022-09-15	12:27:21	1.0595	4.71287	1571.97	FALSE	35
2022-09-15	12:27:21	1.86373	8.29024	1532.44	FALSE	35
2022-09-15	12:27:21	0.972735	4.32692	1576.3	FALSE	35
2022-09-15	12:27:22	0.737265	3.2795	1535.72	FALSE	35
2022-09-15	12:27:22	0.73299	3.26049	1579.56	FALSE	35
2022-09-15	12:27:22	1.67523	7.45176	1543.17	FALSE	35
2022-09-15	12:27:22	0.840929	3.74062	1583.3	FALSE	35
2022-09-15	12:27:23	3.7764	16.7982	1559.97	1	36
2022-09-15	12:27:23	3.15207	14.021	1597.32	1	37
2022-09-15	12:27:23	5.54342	24.6582	1584.62	1	38
2022-09-15	12:27:23	9.60082	42.7064	1640.02	1	39
2022-09-15	12:27:24	8.51945	37.8962	1622.52	1	40
2022-09-15	12:27:24	2.85212	12.6868	1652.71	FALSE	40
2022-09-15	12:27:24	5.81405	25.8621	1648.38	1	41
2022-09-15	12:27:25	9.49029	42.2147	1694.93	1	42
2022-09-15	12:27:25	7.68143	34.1685	1682.55	1	43
2022-09-15	12:27:25	3.55553	15.8157	1710.74	1	44
2022-09-15	12:27:25	4.34408	19.3233	1701.87	1	45
2022-09-15	12:27:26	3.42077	15.2163	1725.96	1	46
2022-09-15	12:27:26	5.02316	22.344	1724.22	1	47
2022-09-15	12:27:26	2.47462	11.0076	1736.97	FALSE	47
2022-09-15	12:27:26	2.54902	11.3386	1735.56	FALSE	47
2022-09-15	12:27:27	1.69849	7.55522	1744.52	FALSE	47
2022-09-15	12:27:27	4.09823	18.2297	1753.79	1	48
2022-09-15	12:27:27	6.73945	29.9784	1774.5	1	49
2022-09-15	12:27:27	3.90612	17.3752	1771.16	1	50
2022-09-15	12:27:28	2.55492	11.3648	1785.86	FALSE	50
2022-09-15	12:27:28	2.00525	8.91975	1780.08	FALSE	50
2022-09-15	12:27:28	1.6623	7.39424	1793.26	FALSE	50
2022-09-15	12:27:29	1.00296	4.46137	1784.54	FALSE	50
2022-09-15	12:27:29	1.50088	6.67621	1799.93	FALSE	50
2022-09-15	12:27:29	0.830038	3.69218	1788.24	FALSE	50
2022-09-15	12:27:29	0.232583	1.03458	1800.97	FALSE	50
2022-09-15	12:27:30	0.376807	1.67611	1789.91	FALSE	50
2022-09-15	12:27:30	0.816094	3.63015	1804.6	FALSE	50
2022-09-15	12:27:30	0.926578	4.1216	1794.03	FALSE	50
2022-09-15	12:27:30	1.46754	6.52791	1811.13	FALSE	50

## Sheet: Tyr_prong_2022915122222 (2)
Date	Time	Lbs	Total force x time			**GoPro Fitting: 1211
2022-09-15	12:22:22	0.730547	0.730547	FALSE	0
2022-09-15	12:22:23	0.732786	1.46333	FALSE	0
2022-09-15	12:22:23	0.76271	2.22604	FALSE	0
2022-09-15	12:22:23	1.10475	3.33079	FALSE	0
2022-09-15	12:22:23	0.737621	4.06841	FALSE	0
2022-09-15	12:22:24	0.727545	4.79596	FALSE	0
2022-09-15	12:22:24	0.733804	5.52976	FALSE	0
2022-09-15	12:22:24	0.737977	6.26774	FALSE	0
2022-09-15	12:22:25	0.732328	7.00007	FALSE	0
2022-09-15	12:22:25	0.731209	7.73128	FALSE	0
2022-09-15	12:22:25	0.728257	8.45953	FALSE	0
2022-09-15	12:22:25	0.739606	9.19914	FALSE	0
2022-09-15	12:22:26	0.735229	9.93437	FALSE	0
2022-09-15	12:22:26	0.733448	10.6678	FALSE	0
2022-09-15	12:22:26	0.731107	11.3989	FALSE	0
2022-09-15	12:22:26	0.738384	12.1373	FALSE	0
2022-09-15	12:22:27	0.732023	12.8693	FALSE	0
2022-09-15	12:22:27	0.744542	13.6139	FALSE	0
2022-09-15	12:22:27	0.746272	14.3601	FALSE	0
2022-09-15	12:22:27	0.897774	15.2579	FALSE	0
2022-09-15	12:22:28	0.940522	16.1984	FALSE	0
2022-09-15	12:22:28	0.924338	17.1228	FALSE	0
2022-09-15	12:22:28	0.949886	18.0727	FALSE	0
2022-09-15	12:22:28	0.970852	19.0435	FALSE	0
2022-09-15	12:22:29	0.961234	20.0048	FALSE	0
2022-09-15	12:22:29	0.963015	20.9678	FALSE	0
2022-09-15	12:22:29	0.967952	21.9357	FALSE	0
2022-09-15	12:22:30	0.980471	22.9162	FALSE	0
2022-09-15	12:22:30	0.987239	23.9034	FALSE	0
2022-09-15	12:22:30	1.00846	24.9119	FALSE	0
2022-09-15	12:22:30	1.01823	25.9301	FALSE	0
2022-09-15	12:22:31	1.025	26.9551	FALSE	0
2022-09-15	12:22:31	1.01263	27.9677	FALSE	0
2022-09-15	12:22:31	1.04485	29.0126	FALSE	0
2022-09-15	12:22:31	1.03864	30.0512	FALSE	0
2022-09-15	12:22:32	1.06922	31.1205	FALSE	0
2022-09-15	12:22:32	1.08475	32.2052	FALSE	0
2022-09-15	12:22:32	1.16872	33.3739	FALSE	0
2022-09-15	12:22:32	1.15955	34.5335	FALSE	0
2022-09-15	12:22:33	1.16505	35.6985	FALSE	0
2022-09-15	12:22:33	1.16169	36.8602	FALSE	0
2022-09-15	12:22:33	1.18754	38.0478	FALSE	0
2022-09-15	12:22:34	1.21869	39.2664	FALSE	0
2022-09-15	12:22:34	1.23803	40.5045	FALSE	0
2022-09-15	12:22:34	1.24057	41.745	FALSE	0
2022-09-15	12:22:34	1.25869	43.0037	FALSE	0
2022-09-15	12:22:35	1.24719	44.2509	FALSE	0
2022-09-15	12:22:35	1.25345	45.5044	FALSE	0
2022-09-15	12:22:35	1.31187	46.8162	FALSE	0
2022-09-15	12:22:35	0.508664	47.3249	FALSE	0
2022-09-15	12:22:36	0.208817	47.5337	FALSE	0
2022-09-15	12:22:36	0.152837	47.6866	FALSE	0
2022-09-15	12:22:36	0.141387	47.828	FALSE	0
2022-09-15	12:22:36	0.171463	47.9994	FALSE	0
2022-09-15	12:22:37	0.284593	48.284	FALSE	0
2022-09-15	12:22:37	0.305305	48.5893	FALSE	0
2022-09-15	12:22:37	0.186018	48.7753	FALSE	0
2022-09-15	12:22:38	0.0979264	48.8733	FALSE	0
2022-09-15	12:22:38	-0.0436511	48.8733	FALSE	0
2022-09-15	12:22:38	-0.041412	48.8733	FALSE	0
2022-09-15	12:22:38	-0.0215138	48.8733	FALSE	0
2022-09-15	12:22:39	0.229071	49.1023	FALSE	0
2022-09-15	12:22:39	0.0305982	49.1329	FALSE	0
2022-09-15	12:22:39	0.196552	49.3295	FALSE	0
2022-09-15	12:22:39	0.0602165	49.3897	FALSE	0
2022-09-15	12:22:40	0.414262	49.804	FALSE	0
2022-09-15	12:22:40	0.176349	49.9803	FALSE	0
2022-09-15	12:22:40	0.433041	50.4133	FALSE	0
2022-09-15	12:22:40	0.192379	50.6057	FALSE	0
2022-09-15	12:22:41	0.610547	51.2163	FALSE	0
2022-09-15	12:22:41	0.3764	51.5927	FALSE	0
2022-09-15	12:22:41	0.413448	52.0061	FALSE	0
2022-09-15	12:22:42	0.363219	52.3693	FALSE	0
2022-09-15	12:22:42	0.324797	52.6941	FALSE	0
2022-09-15	12:22:42	0.306527	53.0007	FALSE	0
2022-09-15	12:22:42	0.346781	53.3474	FALSE	0
2022-09-15	12:22:43	0.0730918	53.4205	FALSE	0
2022-09-15	12:22:43	0.183626	53.6042	FALSE	0
2022-09-15	12:22:43	0.309937	53.9141	FALSE	0
2022-09-15	12:22:43	0.244491	54.1586	FALSE	0
2022-09-15	12:22:44	0.34271	54.5013	FALSE	0
2022-09-15	12:22:44	0.275331	54.7766	FALSE	0
2022-09-15	12:22:44	0.272176	55.0488	FALSE	0
2022-09-15	12:22:45	0.540267	55.5891	FALSE	0
2022-09-15	12:22:45	0.60159	56.1907	FALSE	0
2022-09-15	12:22:45	0.720165	56.9108	FALSE	0
2022-09-15	12:22:45	0.874619	57.7854	FALSE	0
2022-09-15	12:22:46	1.10296	58.8884	FALSE	0
2022-09-15	12:22:46	1.2366	60.125	FALSE	0
2022-09-15	12:22:46	1.75385	61.8789	FALSE	0
2022-09-15	12:22:46	0.588766	62.4676	FALSE	0
2022-09-15	12:22:47	0.291921	62.7595	FALSE	0
2022-09-15	12:22:47	0.460929	63.2205	FALSE	0
2022-09-15	12:22:47	0.43757	63.658	FALSE	0
2022-09-15	12:22:47	0.347646	64.0057	FALSE	0
2022-09-15	12:22:48	0.283779	64.2895	FALSE	0
2022-09-15	12:22:48	0.419453	64.7089	FALSE	0
2022-09-15	12:22:48	0.137672	64.8466	FALSE	0
2022-09-15	12:22:48	0.203881	65.0505	FALSE	0
2022-09-15	12:22:49	0.277723	65.3282	FALSE	0
2022-09-15	12:22:49	-0.0382568	65.3282	FALSE	0
2022-09-15	12:22:49	-0.221056	65.3282	FALSE	0
2022-09-15	12:22:50	-0.0268572	65.3282	FALSE	0
2022-09-15	12:22:50	0.205967	65.5342	FALSE	0
2022-09-15	12:22:50	0.472532	66.0067	FALSE	0
2022-09-15	12:22:50	0.131921	66.1386	FALSE	0
2022-09-15	12:22:51	0.324033	66.4627	FALSE	0
2022-09-15	12:22:51	0.216959	66.6796	FALSE	0
2022-09-15	12:22:51	0.533448	67.2131	FALSE	0
2022-09-15	12:22:51	0.199657	67.4127	FALSE	0
2022-09-15	12:22:52	0.369784	67.7825	FALSE	0
2022-09-15	12:22:52	0.18958	67.9721	FALSE	0
2022-09-15	12:22:52	0.268206	68.2403	FALSE	0
2022-09-15	12:22:53	0.252786	68.4931	FALSE	0
2022-09-15	12:22:53	0.287799	68.7809	FALSE	0
2022-09-15	12:22:53	0.323321	69.1042	FALSE	0
2022-09-15	12:22:53	0.220216	69.3244	FALSE	0
2022-09-15	12:22:54	0.28673	69.6111	FALSE	0
2022-09-15	12:22:54	0.182761	69.7939	FALSE	0
2022-09-15	12:22:54	0.109631	69.9035	FALSE	0
2022-09-15	12:22:54	-0.0304196	69.9035	FALSE	0
2022-09-15	12:22:55	-0.0661956	69.9035	FALSE	0
2022-09-15	12:22:55	-0.0920481	69.9035	FALSE	0
2022-09-15	12:22:55	-0.111437	69.9035	FALSE	0
2022-09-15	12:22:55	-0.448485	69.9035	FALSE	0
2022-09-15	12:22:56	-0.674287	69.9035	FALSE	0
2022-09-15	12:22:56	-0.350317	69.9035	FALSE	0
2022-09-15	12:22:56	0.133804	70.0373	FALSE	0
2022-09-15	12:22:56	0.262557	70.2999	FALSE	0
2022-09-15	12:22:57	0.49584	70.7957	FALSE	0
2022-09-15	12:22:57	0.294618	71.0903	FALSE	0
2022-09-15	12:22:57	0.435026	71.5254	FALSE	0
2022-09-15	12:22:58	0.412074	71.9374	FALSE	0
2022-09-15	12:22:58	0.508257	72.4457	FALSE	0
2022-09-15	12:22:58	0.349377	72.7951	FALSE	0
2022-09-15	12:22:58	0.354262	73.1493	FALSE	0
2022-09-15	12:22:59	0.371768	73.5211	FALSE	0
2022-09-15	12:22:59	0.315738	73.8369	FALSE	0
2022-09-15	12:22:59	0.26042	74.0973	FALSE	0
2022-09-15	12:22:59	0.328766	74.426	FALSE	0
2022-09-15	12:23:00	0.730496	75.1565	FALSE	0
2022-09-15	12:23:00	0.638995	75.7955	FALSE	0
2022-09-15	12:23:00	-0.290267	75.7955	FALSE	0
2022-09-15	12:23:00	-0.597035	75.7955	FALSE	0
2022-09-15	12:23:01	-0.473524	75.7955	FALSE	0
2022-09-15	12:23:01	-0.246755	75.7955	FALSE	0
2022-09-15	12:23:01	-0.217748	75.7955	FALSE	0
2022-09-15	12:23:02	-0.324567	75.7955	FALSE	0
2022-09-15	12:23:02	-0.204872	75.7955	FALSE	0
2022-09-15	12:23:02	-0.297035	75.7955	FALSE	0
2022-09-15	12:23:02	-0.103244	75.7955	FALSE	0
2022-09-15	12:23:03	-0.330419	75.7955	FALSE	0
2022-09-15	12:23:03	-0.249911	75.7955	FALSE	0
2022-09-15	12:23:03	-0.286297	75.7955	FALSE	0
2022-09-15	12:23:03	-0.204211	75.7955	FALSE	0
2022-09-15	12:23:04	-0.31444	75.7955	FALSE	0
2022-09-15	12:23:04	-0.160954	75.7955	FALSE	0
2022-09-15	12:23:04	-0.214745	75.7955	FALSE	0
2022-09-15	12:23:05	-0.0844145	75.7955	FALSE	0
2022-09-15	12:23:05	-0.118257	75.7955	FALSE	0
2022-09-15	12:23:05	0.22612	76.0216	FALSE	0
2022-09-15	12:23:05	0.253651	76.2753	FALSE	0
2022-09-15	12:23:06	0.217519	76.4928	FALSE	0
2022-09-15	12:23:06	0.111667	76.6045	FALSE	0
2022-09-15	12:23:06	0.26327	76.8678	FALSE	0
2022-09-15	12:23:06	0.182303	77.0501	FALSE	0
2022-09-15	12:23:07	0.0645422	77.1146	FALSE	0
2022-09-15	12:23:07	0.0138043	77.1284	FALSE	0
2022-09-15	12:23:07	0.0498857	77.1783	FALSE	0
2022-09-15	12:23:07	0.00871527	77.187	FALSE	0
2022-09-15	12:23:08	0.0312597	77.2183	FALSE	0
2022-09-15	12:23:08	0.0501401	77.2684	FALSE	0
2022-09-15	12:23:08	0.132583	77.401	FALSE	0
2022-09-15	12:23:08	0.0722267	77.4732	FALSE	0
2022-09-15	12:23:09	-0.0947961	77.4732	FALSE	0
2022-09-15	12:23:09	0.0160435	77.4893	FALSE	0
2022-09-15	12:23:09	-0.00517788	77.4893	FALSE	0
2022-09-15	12:23:10	0.032074	77.5213	FALSE	0
2022-09-15	12:23:10	-0.100089	77.5213	FALSE	0
2022-09-15	12:23:10	0.0150765	77.5364	FALSE	0
2022-09-15	12:23:10	-0.00365114	77.5364	FALSE	0
2022-09-15	12:23:11	0.0140078	77.5504	FALSE	0
2022-09-15	12:23:11	-0.100445	77.5504	FALSE	0
2022-09-15	12:23:11	-0.0109794	77.5504	FALSE	0
2022-09-15	12:23:11	-0.00365114	77.5504	FALSE	0
2022-09-15	12:23:12	-0.112964	77.5504	FALSE	0
2022-09-15	12:23:12	0.0728883	77.6233	FALSE	0
2022-09-15	12:23:12	0.0559417	77.6792	FALSE	0
2022-09-15	12:23:12	0.26785	77.9471	FALSE	0
2022-09-15	12:23:13	0.172481	78.1196	FALSE	0
2022-09-15	12:23:13	0.230293	78.3499	FALSE	0
2022-09-15	12:23:13	0.066985	78.4169	FALSE	0
2022-09-15	12:23:14	0.234924	78.6518	FALSE	0
2022-09-15	12:23:14	0.167952	78.8197	FALSE	0
2022-09-15	12:23:14	0.028359	78.8481	FALSE	0
2022-09-15	12:23:14	0.257214	79.1053	FALSE	0
2022-09-15	12:23:15	0.00138701	79.1067	FALSE	0
2022-09-15	12:23:15	0.22159	79.3283	FALSE	0
2022-09-15	12:23:15	0.0583336	79.3866	FALSE	0
2022-09-15	12:23:15	0.182507	79.5691	FALSE	0
2022-09-15	12:23:16	-0.0133204	79.5691	FALSE	0
2022-09-15	12:23:16	0.123779	79.6929	FALSE	0
2022-09-15	12:23:16	0.133702	79.8266	FALSE	0
2022-09-15	12:23:16	0.411056	80.2377	FALSE	0
2022-09-15	12:23:17	0.156858	80.3945	FALSE	0
2022-09-15	12:23:17	0.112074	80.5066	FALSE	0
2022-09-15	12:23:17	0.0166033	80.5232	FALSE	0
2022-09-15	12:23:18	-0.0638038	80.5232	FALSE	0
2022-09-15	12:23:18	-0.227061	80.5232	FALSE	0
2022-09-15	12:23:18	-0.419936	80.5232	FALSE	0
2022-09-15	12:23:18	-0.315407	80.5232	FALSE	0
2022-09-15	12:23:19	-0.37215	80.5232	FALSE	0
2022-09-15	12:23:19	-0.399173	80.5232	FALSE	0
2022-09-15	12:23:19	-0.322175	80.5232	FALSE	0
2022-09-15	12:23:19	-0.231234	80.5232	FALSE	0
2022-09-15	12:23:20	-0.0713865	80.5232	FALSE	0
2022-09-15	12:23:20	-0.155661	80.5232	FALSE	0
2022-09-15	12:23:20	0.218588	80.7418	FALSE	0
2022-09-15	12:23:21	0.351667	81.0935	FALSE	0
2022-09-15	12:23:21	0.999504	82.093	FALSE	0
2022-09-15	12:23:21	0.888461	82.9814	FALSE	0
2022-09-15	12:23:21	0.892939	83.8744	FALSE	0
2022-09-15	12:23:22	0.866527	84.7409	FALSE	0
2022-09-15	12:23:22	0.0975193	84.8384	FALSE	0
2022-09-15	12:23:22	0.221285	85.0597	FALSE	0
2022-09-15	12:23:22	0.322812	85.3825	FALSE	0
2022-09-15	12:23:23	-0.0326588	85.3825	FALSE	0
2022-09-15	12:23:23	0.0674429	85.4499	FALSE	0
2022-09-15	12:23:23	-0.0669081	85.4499	FALSE	0
2022-09-15	12:23:23	0.106629	85.5566	FALSE	0
2022-09-15	12:23:24	-0.118918	85.5566	FALSE	0
2022-09-15	12:23:24	-0.0494527	85.5566	FALSE	0
2022-09-15	12:23:24	0.0970612	85.6536	FALSE	0
2022-09-15	12:23:24	0.0130918	85.6667	FALSE	0
2022-09-15	12:23:25	0.140827	85.8075	FALSE	0
2022-09-15	12:23:25	0.177417	85.985	FALSE	0
2022-09-15	12:23:25	0.214211	86.1992	FALSE	0
2022-09-15	12:23:26	0.137163	86.3363	FALSE	0
2022-09-15	12:23:26	0.136603	86.4729	FALSE	0
2022-09-15	12:23:26	0.124797	86.5977	FALSE	0
2022-09-15	12:23:26	0.113092	86.7108	FALSE	0
2022-09-15	12:23:27	0.0420994	86.7529	FALSE	0
2022-09-15	12:23:27	-0.176374	86.7529	FALSE	0
2022-09-15	12:23:27	-0.285687	86.7529	FALSE	0
2022-09-15	12:23:27	-0.0797325	86.7529	FALSE	0
2022-09-15	12:23:28	-0.128282	86.7529	FALSE	0
2022-09-15	12:23:28	-0.078104	86.7529	FALSE	0
2022-09-15	12:23:28	-0.0583585	86.7529	FALSE	0
2022-09-15	12:23:29	-0.0790201	86.7529	FALSE	0
2022-09-15	12:23:29	0.0280028	86.7809	FALSE	0
2022-09-15	12:23:29	-0.143448	86.7809	FALSE	0
2022-09-15	12:23:29	-0.000597729	86.7809	FALSE	0
2022-09-15	12:23:30	-0.12986	86.7809	FALSE	0
2022-09-15	12:23:30	-0.0656867	86.7809	FALSE	0
2022-09-15	12:23:30	-0.0502669	86.7809	FALSE	0
2022-09-15	12:23:30	-0.0675188	86.7809	FALSE	0
2022-09-15	12:23:31	0.178944	86.9599	FALSE	0
2022-09-15	12:23:31	-0.18131	86.9599	FALSE	0
2022-09-15	12:23:31	0.110293	87.0702	FALSE	0
2022-09-15	12:23:31	1.3309	88.4011	FALSE	0
2022-09-15	12:23:32	3.05691	91.458	1	1
2022-09-15	12:23:32	2.82317	94.2812	FALSE	1
2022-09-15	12:23:32	2.28851	96.5697	FALSE	1
2022-09-15	12:23:32	1.51396	98.0836	FALSE	1
2022-09-15	12:23:33	1.32164	99.4053	FALSE	1
2022-09-15	12:23:33	1.93604	101.341	FALSE	1
2022-09-15	12:23:33	1.10327	102.445	FALSE	1
2022-09-15	12:23:34	2.52607	104.971	FALSE	1
2022-09-15	12:23:34	1.76607	106.737	FALSE	1
2022-09-15	12:23:34	1.00632	107.743	FALSE	1
2022-09-15	12:23:34	1.74337	109.486	FALSE	1
2022-09-15	12:23:35	0.790344	110.277	FALSE	1
2022-09-15	12:23:35	0.697163	110.974	FALSE	1
2022-09-15	12:23:35	0.534109	111.508	FALSE	1
2022-09-15	12:23:35	0.323117	111.831	FALSE	1
2022-09-15	12:23:36	0.355178	112.186	FALSE	1
2022-09-15	12:23:36	0.191972	112.378	FALSE	1
2022-09-15	12:23:36	0.440166	112.818	FALSE	1
2022-09-15	12:23:37	0.291311	113.11	FALSE	1
2022-09-15	12:23:37	0.330649	113.44	FALSE	1
2022-09-15	12:23:37	0.337214	113.778	FALSE	1
2022-09-15	12:23:37	0.221285	113.999	FALSE	1
2022-09-15	12:23:38	0.227443	114.226	FALSE	1
2022-09-15	12:23:38	0.190089	114.416	FALSE	1
2022-09-15	12:23:38	0.0715142	114.488	FALSE	1
2022-09-15	12:23:38	-0.0401906	114.488	FALSE	1
2022-09-15	12:23:39	-0.090674	114.488	FALSE	1
2022-09-15	12:23:39	0.026985	114.515	FALSE	1
2022-09-15	12:23:39	0.00556005	114.521	FALSE	1
2022-09-15	12:23:39	0.0162979	114.537	FALSE	1
2022-09-15	12:23:40	0.0261707	114.563	FALSE	1
2022-09-15	12:23:40	-0.00100484	114.563	FALSE	1
2022-09-15	12:23:40	-0.0374425	114.563	FALSE	1
2022-09-15	12:23:41	-0.0997326	114.563	FALSE	1
2022-09-15	12:23:41	-0.199529	114.563	FALSE	1
2022-09-15	12:23:41	-0.284364	114.563	FALSE	1
2022-09-15	12:23:41	-0.398918	114.563	FALSE	1
2022-09-15	12:23:42	-0.292913	114.563	FALSE	1
2022-09-15	12:23:42	-0.183549	114.563	FALSE	1
2022-09-15	12:23:42	-0.169554	114.563	FALSE	1
2022-09-15	12:23:42	-0.172455	114.563	FALSE	1
2022-09-15	12:23:43	-0.103804	114.563	FALSE	1
2022-09-15	12:23:43	-0.0555086	114.563	FALSE	1
2022-09-15	12:23:43	-0.139478	114.563	FALSE	1
2022-09-15	12:23:43	-0.0976969	114.563	FALSE	1
2022-09-15	12:23:44	0.18785	114.751	FALSE	1
2022-09-15	12:23:44	0.725153	115.476	FALSE	1
2022-09-15	12:23:44	0.471107	115.947	FALSE	1
2022-09-15	12:23:45	-0.058613	115.947	FALSE	1
2022-09-15	12:23:45	-0.155712	115.947	FALSE	1
2022-09-15	12:23:45	-0.0532694	115.947	FALSE	1
2022-09-15	12:23:45	0.0204201	115.967	FALSE	1
2022-09-15	12:23:46	0.156451	116.124	FALSE	1
2022-09-15	12:23:46	0.285	116.409	FALSE	1
2022-09-15	12:23:46	0.716145	117.125	FALSE	1
2022-09-15	12:23:46	0.489071	117.614	FALSE	1
2022-09-15	12:23:47	0.50841	118.123	FALSE	1
2022-09-15	12:23:47	0.316298	118.439	FALSE	1
2022-09-15	12:23:47	0.556348	118.995	FALSE	1
2022-09-15	12:23:47	0.36154	119.357	FALSE	1
2022-09-15	12:23:48	0.342659	119.699	FALSE	1
2022-09-15	12:23:48	0.440674	120.14	FALSE	1
2022-09-15	12:23:48	0.537621	120.678	FALSE	1
2022-09-15	12:23:49	1.43192	122.11	FALSE	1
2022-09-15	12:23:49	1.43538	123.545	FALSE	1
2022-09-15	12:23:49	2.06724	125.612	FALSE	1
2022-09-15	12:23:49	0.988868	126.601	FALSE	1
2022-09-15	12:23:50	0.819555	127.421	FALSE	1
2022-09-15	12:23:50	0.664949	128.086	FALSE	1
2022-09-15	12:23:50	0.240522	128.326	FALSE	1
2022-09-15	12:23:50	0.249275	128.575	FALSE	1
2022-09-15	12:23:51	0.288003	128.863	FALSE	1
2022-09-15	12:23:51	0.332176	129.196	FALSE	1
2022-09-15	12:23:51	0.489886	129.685	FALSE	1
2022-09-15	12:23:51	1.33492	131.02	FALSE	1
2022-09-15	12:23:52	3.63945	134.66	1	2
2022-09-15	12:23:52	3.79395	138.454	1	3
2022-09-15	12:23:52	1.64627	140.1	FALSE	3
2022-09-15	12:23:53	0.811666	140.912	FALSE	3
2022-09-15	12:23:53	0.674262	141.586	FALSE	3
2022-09-15	12:23:53	0.388919	141.975	FALSE	3
2022-09-15	12:23:53	0.51869	142.494	FALSE	3
2022-09-15	12:23:54	1.17141	143.665	FALSE	3
2022-09-15	12:23:54	0.496247	144.161	FALSE	3
2022-09-15	12:23:54	-0.0650761	144.161	FALSE	3
2022-09-15	12:23:54	-0.109605	144.161	FALSE	3
2022-09-15	12:23:55	-0.0797325	144.161	FALSE	3
2022-09-15	12:23:55	-0.0302669	144.161	FALSE	3
2022-09-15	12:23:55	0.255534	144.417	FALSE	3
2022-09-15	12:23:55	0.431412	144.848	FALSE	3
2022-09-15	12:23:56	0.242405	145.091	FALSE	3
2022-09-15	12:23:56	0.42159	145.512	FALSE	3
2022-09-15	12:23:56	0.382964	145.895	FALSE	3
2022-09-15	12:23:57	0.449631	146.345	FALSE	3
2022-09-15	12:23:57	0.479606	146.824	FALSE	3
2022-09-15	12:23:57	0.385051	147.209	FALSE	3
2022-09-15	12:23:57	0.435891	147.645	FALSE	3
2022-09-15	12:23:58	0.427036	148.072	FALSE	3
2022-09-15	12:23:58	0.380369	148.453	FALSE	3
2022-09-15	12:23:58	0.290649	148.743	FALSE	3
2022-09-15	12:23:59	0.323779	149.067	FALSE	3
2022-09-15	12:23:59	0.355942	149.423	FALSE	3
2022-09-15	12:23:59	0.555076	149.978	FALSE	3
2022-09-15	12:23:59	0.668359	150.647	FALSE	3
2022-09-15	12:23:59	0.470954	151.118	FALSE	3
2022-09-15	12:24:00	0.727952	151.845	FALSE	3
2022-09-15	12:24:00	0.347646	152.193	FALSE	3
2022-09-15	12:24:00	0.296807	152.49	FALSE	3
2022-09-15	12:24:01	0.266221	152.756	FALSE	3
2022-09-15	12:24:01	0.217316	152.973	FALSE	3
2022-09-15	12:24:01	0.202201	153.176	FALSE	3
2022-09-15	12:24:01	0.181336	153.357	FALSE	3
2022-09-15	12:24:02	0.147341	153.504	FALSE	3
2022-09-15	12:24:02	0.118537	153.623	FALSE	3
2022-09-15	12:24:02	0.102507	153.725	FALSE	3
2022-09-15	12:24:02	0.108664	153.834	FALSE	3
2022-09-15	12:24:03	0.107087	153.941	FALSE	3
2022-09-15	12:24:03	0.101947	154.043	FALSE	3
2022-09-15	12:24:03	0.114364	154.157	FALSE	3
2022-09-15	12:24:03	0.131158	154.289	FALSE	3
2022-09-15	12:24:04	0.136858	154.425	FALSE	3
2022-09-15	12:24:04	0.115484	154.541	FALSE	3
2022-09-15	12:24:04	0.107392	154.648	FALSE	3
2022-09-15	12:24:05	0.139199	154.788	FALSE	3
2022-09-15	12:24:05	0.175229	154.963	FALSE	3
2022-09-15	12:24:05	0.0890714	155.052	FALSE	3
2022-09-15	12:24:05	0.0269341	155.079	FALSE	3
2022-09-15	12:24:06	0.0991478	155.178	FALSE	3
2022-09-15	12:24:06	0.120674	155.299	FALSE	3
2022-09-15	12:24:06	-0.0189183	155.299	FALSE	3
2022-09-15	12:24:06	-0.0722516	155.299	FALSE	3
2022-09-15	12:24:07	-0.137035	155.299	FALSE	3
2022-09-15	12:24:07	-0.18818	155.299	FALSE	3
2022-09-15	12:24:07	-0.194542	155.299	FALSE	3
2022-09-15	12:24:07	-0.140343	155.299	FALSE	3
2022-09-15	12:24:08	-0.216883	155.299	FALSE	3
2022-09-15	12:24:08	-0.281412	155.299	FALSE	3
2022-09-15	12:24:08	-0.071132	155.299	FALSE	3
2022-09-15	12:24:09	0.0427611	155.341	FALSE	3
2022-09-15	12:24:09	-0.183804	155.341	FALSE	3
2022-09-15	12:24:09	-0.00619567	155.341	FALSE	3
2022-09-15	12:24:09	0.683117	156.024	FALSE	3
2022-09-15	12:24:10	1.88357	157.908	FALSE	3
2022-09-15	12:24:10	1.48968	159.398	FALSE	3
2022-09-15	12:24:10	1.18317	160.581	FALSE	3
2022-09-15	12:24:10	0.297163	160.878	FALSE	3
2022-09-15	12:24:11	0.368155	161.246	FALSE	3
2022-09-15	12:24:11	0.293295	161.54	FALSE	3
2022-09-15	12:24:11	-0.0555086	161.54	FALSE	3
2022-09-15	12:24:11	-0.31276	161.54	FALSE	3
2022-09-15	12:24:12	-0.215356	161.54	FALSE	3
2022-09-15	12:24:12	-0.0295545	161.54	FALSE	3
2022-09-15	12:24:12	0.034415	161.574	FALSE	3
2022-09-15	12:24:13	0.144644	161.719	FALSE	3
2022-09-15	12:24:13	0.14729	161.866	FALSE	3
2022-09-15	12:24:13	0.169275	162.035	FALSE	3
2022-09-15	12:24:13	0.263015	162.298	FALSE	3
2022-09-15	12:24:14	0.115942	162.414	FALSE	3
2022-09-15	12:24:14	0.021845	162.436	FALSE	3
2022-09-15	12:24:14	0.0522776	162.488	FALSE	3
2022-09-15	12:24:15	0.293448	162.782	FALSE	3
2022-09-15	12:24:15	0.36673	163.148	FALSE	3
2022-09-15	12:24:15	0.675127	163.824	FALSE	3
2022-09-15	12:24:15	0.478639	164.302	FALSE	3
2022-09-15	12:24:15	0.270547	164.573	FALSE	3
2022-09-15	12:24:16	0.158944	164.732	FALSE	3
2022-09-15	12:24:16	0.0909544	164.823	FALSE	3
2022-09-15	12:24:16	0.0161961	164.839	FALSE	3
2022-09-15	12:24:17	-0.0964246	164.839	FALSE	3
2022-09-15	12:24:17	-0.225025	164.839	FALSE	3
2022-09-15	12:24:17	-0.25103	164.839	FALSE	3
2022-09-15	12:24:17	-0.294084	164.839	FALSE	3
2022-09-15	12:24:18	-0.4122	164.839	FALSE	3
2022-09-15	12:24:18	-0.640597	164.839	FALSE	3
2022-09-15	12:24:18	-0.6865	164.839	FALSE	3
2022-09-15	12:24:18	-0.893931	164.839	FALSE	3
2022-09-15	12:24:19	-0.727264	164.839	FALSE	3
2022-09-15	12:24:19	-0.88416	164.839	FALSE	3
2022-09-15	12:24:19	-0.746246	164.839	FALSE	3
2022-09-15	12:24:19	-0.592811	164.839	FALSE	3
2022-09-15	12:24:20	0.163779	165.003	FALSE	3
2022-09-15	12:24:20	1.90011	166.903	FALSE	3
2022-09-15	12:24:20	3.22866	170.131	1	4
2022-09-15	12:24:21	5.36103	175.492	1	5
2022-09-15	12:24:21	3.77238	179.265	1	6
2022-09-15	12:24:21	4.38851	183.653	1	7
2022-09-15	12:24:21	1.41151	185.065	FALSE	7
2022-09-15	12:24:22	0.390649	185.455	FALSE	7
2022-09-15	12:24:22	0.634974	186.09	FALSE	7
2022-09-15	12:24:22	0.441998	186.532	FALSE	7
2022-09-15	12:24:22	0.0929391	186.625	FALSE	7
2022-09-15	12:24:23	0.496094	187.121	FALSE	7
2022-09-15	12:24:23	0.0928883	187.214	FALSE	7
2022-09-15	12:24:23	0.617672	187.832	FALSE	7
2022-09-15	12:24:23	0.590242	188.422	FALSE	7
2022-09-15	12:24:24	0.806577	189.229	FALSE	7
2022-09-15	12:24:24	0.761692	189.991	FALSE	7
2022-09-15	12:24:24	0.446221	190.437	FALSE	7
2022-09-15	12:24:25	0.685204	191.122	FALSE	7
2022-09-15	12:24:25	0.720369	191.842	FALSE	7
2022-09-15	12:24:25	0.258741	192.101	FALSE	7
2022-09-15	12:24:25	0.564135	192.665	FALSE	7
2022-09-15	12:24:26	0.480216	193.145	FALSE	7
2022-09-15	12:24:26	0.42098	193.566	FALSE	7
2022-09-15	12:24:26	0.504695	194.071	FALSE	7
2022-09-15	12:24:26	0.240725	194.312	FALSE	7
2022-09-15	12:24:27	0.763575	195.075	FALSE	7
2022-09-15	12:24:27	0.384237	195.46	FALSE	7
2022-09-15	12:24:27	0.604847	196.064	FALSE	7
2022-09-15	12:24:27	0.706069	196.771	FALSE	7
2022-09-15	12:24:28	0.728715	197.499	FALSE	7
2022-09-15	12:24:28	0.723575	198.223	FALSE	7
2022-09-15	12:24:28	0.486679	198.709	FALSE	7
2022-09-15	12:24:29	0.674313	199.384	FALSE	7
2022-09-15	12:24:29	0.732481	200.116	FALSE	7
2022-09-15	12:24:29	0.659606	200.776	FALSE	7
2022-09-15	12:24:29	0.573855	201.35	FALSE	7
2022-09-15	12:24:30	0.726832	202.077	FALSE	7
2022-09-15	12:24:30	0.733244	202.81	FALSE	7
2022-09-15	12:24:30	0.731005	203.541	FALSE	7
2022-09-15	12:24:30	0.688003	204.229	FALSE	7
2022-09-15	12:24:31	0.730293	204.959	FALSE	7
2022-09-15	12:24:31	0.733346	205.692	FALSE	7
2022-09-15	12:24:31	0.728766	206.421	FALSE	7
2022-09-15	12:24:31	0.723015	207.144	FALSE	7
2022-09-15	12:24:32	0.73472	207.879	FALSE	7
2022-09-15	12:24:32	0.728817	208.608	FALSE	7
2022-09-15	12:24:32	0.734924	209.343	FALSE	7
2022-09-15	12:24:33	0.730852	210.074	FALSE	7
2022-09-15	12:24:33	0.726832	210.8	FALSE	7
2022-09-15	12:24:33	0.727545	211.528	FALSE	7
2022-09-15	12:24:33	0.735992	212.264	FALSE	7
2022-09-15	12:24:34	0.728868	212.993	FALSE	7
2022-09-15	12:24:34	0.729886	213.723	FALSE	7
2022-09-15	12:24:34	0.720318	214.443	FALSE	7
2022-09-15	12:24:34	0.733295	215.176	FALSE	7
2022-09-15	12:24:35	0.734008	215.91	FALSE	7
2022-09-15	12:24:35	0.732277	216.643	FALSE	7
2022-09-15	12:24:35	0.727341	217.37	FALSE	7
2022-09-15	12:24:35	0.730242	218.1	FALSE	7
2022-09-15	12:24:36	0.731361	218.832	FALSE	7
2022-09-15	12:24:36	0.736043	219.568	FALSE	7
2022-09-15	12:24:36	0.727799	220.295	FALSE	7
2022-09-15	12:24:37	0.727697	221.023	FALSE	7
2022-09-15	12:24:37	0.730903	221.754	FALSE	7
2022-09-15	12:24:37	0.727748	222.482	FALSE	7
2022-09-15	12:24:37	0.727188	223.209	FALSE	7
2022-09-15	12:24:38	0.734466	223.943	FALSE	7
2022-09-15	12:24:38	0.734669	224.678	FALSE	7
2022-09-15	12:24:38	0.731565	225.41	FALSE	7
2022-09-15	12:24:38	0.73187	226.141	FALSE	7
2022-09-15	12:24:39	0.733855	226.875	FALSE	7
2022-09-15	12:24:39	0.729377	227.605	FALSE	7
2022-09-15	12:24:39	0.73355	228.338	FALSE	7
2022-09-15	12:24:39	0.734669	229.073	FALSE	7
2022-09-15	12:24:40	0.736298	229.809	FALSE	7
2022-09-15	12:24:40	0.73014	230.539	FALSE	7
2022-09-15	12:24:40	0.728155	231.268	FALSE	7
2022-09-15	12:24:41	0.728359	231.996	FALSE	7
2022-09-15	12:24:41	0.72897	232.725	FALSE	7
2022-09-15	12:24:41	0.733855	233.459	FALSE	7
2022-09-15	12:24:41	0.731056	234.19	FALSE	7
2022-09-15	12:24:42	0.736196	234.926	FALSE	7
2022-09-15	12:24:42	0.732023	235.658	FALSE	7
2022-09-15	12:24:42	0.730445	236.388	FALSE	7
2022-09-15	12:24:42	0.723168	237.112	FALSE	7
2022-09-15	12:24:43	0.73416	237.846	FALSE	7
2022-09-15	12:24:43	0.736959	238.583	FALSE	7
2022-09-15	12:24:43	0.735178	239.318	FALSE	7
2022-09-15	12:24:43	0.729478	240.047	FALSE	7
2022-09-15	12:24:44	0.729529	240.777	FALSE	7
2022-09-15	12:24:44	0.735483	241.512	FALSE	7
2022-09-15	12:24:44	0.739555	242.252	FALSE	7
2022-09-15	12:24:45	0.738384	242.99	FALSE	7
2022-09-15	12:24:45	0.725305	243.716	FALSE	7
2022-09-15	12:24:45	0.732837	244.448	FALSE	7
2022-09-15	12:24:45	0.731565	245.18	FALSE	7
2022-09-15	12:24:46	0.737977	245.918	FALSE	7
2022-09-15	12:24:46	0.734568	246.653	FALSE	7
2022-09-15	12:24:46	0.732684	247.385	FALSE	7
2022-09-15	12:24:46	0.731361	248.117	FALSE	7
2022-09-15	12:24:47	0.734669	248.851	FALSE	7
2022-09-15	12:24:47	0.729275	249.581	FALSE	7
2022-09-15	12:24:47	0.731819	250.312	FALSE	7
2022-09-15	12:24:47	0.72958	251.042	FALSE	7
2022-09-15	12:24:48	0.738384	251.78	FALSE	7
2022-09-15	12:24:48	0.727392	252.508	FALSE	7
2022-09-15	12:24:48	0.734364	253.242	FALSE	7
2022-09-15	12:24:49	0.729784	253.972	FALSE	7
2022-09-15	12:24:49	0.731667	254.704	FALSE	7
2022-09-15	12:24:49	0.727392	255.431	FALSE	7
2022-09-15	12:24:49	0.731667	256.163	FALSE	7
2022-09-15	12:24:50	0.734415	256.897	FALSE	7
2022-09-15	12:24:50	0.731819	257.629	FALSE	7
2022-09-15	12:24:50	0.734008	258.363	FALSE	7
2022-09-15	12:24:50	0.734059	259.097	FALSE	7
2022-09-15	12:24:51	0.731616	259.829	FALSE	7
2022-09-15	12:24:51	0.727239	260.556	FALSE	7
2022-09-15	12:24:51	0.731412	261.287	FALSE	7
2022-09-15	12:24:51	0.731514	262.019	FALSE	7
2022-09-15	12:24:52	0.731667	262.75	FALSE	7
2022-09-15	12:24:52	0.732328	263.483	FALSE	7
2022-09-15	12:24:52	0.734924	264.218	FALSE	7
2022-09-15	12:24:53	0.734822	264.952	FALSE	7
2022-09-15	12:24:53	0.732074	265.684	FALSE	7
2022-09-15	12:24:53	0.727748	266.412	FALSE	7
2022-09-15	12:24:53	0.730394	267.143	FALSE	7
2022-09-15	12:24:54	0.728766	267.871	FALSE	7
2022-09-15	12:24:54	0.730242	268.602	FALSE	7
2022-09-15	12:24:54	0.730089	269.332	FALSE	7
2022-09-15	12:24:54	0.728104	270.06	FALSE	7
2022-09-15	12:24:55	0.726934	270.787	FALSE	7
2022-09-15	12:24:55	0.732532	271.519	FALSE	7
2022-09-15	12:24:55	0.73014	272.249	FALSE	7
2022-09-15	12:24:55	0.732074	272.982	FALSE	7
2022-09-15	12:24:56	0.734262	273.716	FALSE	7
2022-09-15	12:24:56	0.737519	274.453	FALSE	7
2022-09-15	12:24:56	0.730598	275.184	FALSE	7
2022-09-15	12:24:57	0.734822	275.919	FALSE	7
2022-09-15	12:24:57	0.729173	276.648	FALSE	7
2022-09-15	12:24:57	0.732837	277.381	FALSE	7
2022-09-15	12:24:57	0.730242	278.111	FALSE	7
2022-09-15	12:24:58	0.732175	278.843	FALSE	7
2022-09-15	12:24:58	0.727087	279.57	FALSE	7
2022-09-15	12:24:58	0.731209	280.301	FALSE	7
2022-09-15	12:24:58	0.724949	281.026	FALSE	7
2022-09-15	12:24:59	0.731616	281.758	FALSE	7
2022-09-15	12:24:59	0.735433	282.493	FALSE	7
2022-09-15	12:24:59	0.73131	283.225	FALSE	7
2022-09-15	12:24:59	0.733957	283.959	FALSE	7
2022-09-15	12:25:00	0.729835	284.689	FALSE	7
2022-09-15	12:25:00	0.736043	285.425	FALSE	7
2022-09-15	12:25:00	0.737417	286.162	FALSE	7
2022-09-15	12:25:01	0.735178	286.897	FALSE	7
2022-09-15	12:25:01	0.728664	287.626	FALSE	7
2022-09-15	12:25:01	0.732379	288.358	FALSE	7
2022-09-15	12:25:01	0.732074	289.09	FALSE	7
2022-09-15	12:25:02	0.741031	289.831	FALSE	7
2022-09-15	12:25:02	0.727901	290.559	FALSE	7
2022-09-15	12:25:02	0.729071	291.288	FALSE	7
2022-09-15	12:25:02	0.728308	292.017	FALSE	7
2022-09-15	12:25:03	0.728308	292.745	FALSE	7
2022-09-15	12:25:03	0.72673	293.472	FALSE	7
2022-09-15	12:25:03	0.728257	294.2	FALSE	7
2022-09-15	12:25:03	0.730496	294.93	FALSE	7
2022-09-15	12:25:04	0.736043	295.666	FALSE	7
2022-09-15	12:25:04	0.73243	296.399	FALSE	7
2022-09-15	12:25:04	0.730394	297.129	FALSE	7
2022-09-15	12:25:05	0.716349	297.846	FALSE	7
2022-09-15	12:25:05	0.730751	298.576	FALSE	7
2022-09-15	12:25:05	0.730089	299.306	FALSE	7
2022-09-15	12:25:05	0.733957	300.04	FALSE	7
2022-09-15	12:25:06	0.731412	300.772	FALSE	7
2022-09-15	12:25:06	0.732634	301.504	FALSE	7
2022-09-15	12:25:06	0.729987	302.234	FALSE	7
2022-09-15	12:25:06	0.732023	302.966	FALSE	7
2022-09-15	12:25:07	0.733346	303.7	FALSE	7
2022-09-15	12:25:07	0.728562	304.428	FALSE	7
2022-09-15	12:25:07	0.736552	305.165	FALSE	7
2022-09-15	12:25:07	0.730547	305.895	FALSE	7
2022-09-15	12:25:08	0.734618	306.63	FALSE	7
2022-09-15	12:25:08	0.733448	307.364	FALSE	7
2022-09-15	12:25:08	0.732023	308.096	FALSE	7
2022-09-15	12:25:09	0.735534	308.831	FALSE	7
2022-09-15	12:25:09	0.733397	309.564	FALSE	7
2022-09-15	12:25:09	0.730903	310.295	FALSE	7
2022-09-15	12:25:09	0.738028	311.033	FALSE	7
2022-09-15	12:25:10	0.735789	311.769	FALSE	7
2022-09-15	12:25:10	0.733499	312.503	FALSE	7
2022-09-15	12:25:10	0.738079	313.241	FALSE	7
2022-09-15	12:25:10	0.73645	313.977	FALSE	7
2022-09-15	12:25:11	0.731717	314.709	FALSE	7
2022-09-15	12:25:11	0.728715	315.438	FALSE	7
2022-09-15	12:25:11	0.737214	316.175	FALSE	7
2022-09-15	12:25:11	0.73472	316.91	FALSE	7
2022-09-15	12:25:12	0.735483	317.645	FALSE	7
2022-09-15	12:25:12	0.735229	318.38	FALSE	7
2022-09-15	12:25:12	0.735738	319.116	FALSE	7
2022-09-15	12:25:13	0.731259	319.847	FALSE	7
2022-09-15	12:25:13	0.731565	320.579	FALSE	7
2022-09-15	12:25:13	0.73187	321.311	FALSE	7
2022-09-15	12:25:13	0.733142	322.044	FALSE	7
2022-09-15	12:25:14	0.73874	322.783	FALSE	7
2022-09-15	12:25:14	0.738588	323.521	FALSE	7
2022-09-15	12:25:14	0.733041	324.254	FALSE	7
2022-09-15	12:25:14	0.730598	324.985	FALSE	7
2022-09-15	12:25:15	0.732837	325.718	FALSE	7
2022-09-15	12:25:15	0.735585	326.453	FALSE	7
2022-09-15	12:25:15	0.728613	327.182	FALSE	7
2022-09-15	12:25:15	0.695687	327.878	FALSE	7
2022-09-15	12:25:16	0.732735	328.61	FALSE	7
2022-09-15	12:25:16	0.719249	329.33	FALSE	7
2022-09-15	12:25:16	0.538588	329.868	FALSE	7
2022-09-15	12:25:17	0.718333	330.586	FALSE	7
2022-09-15	12:25:17	0.731768	331.318	FALSE	7
2022-09-15	12:25:17	0.737722	332.056	FALSE	7
2022-09-15	12:25:17	0.735382	332.791	FALSE	7
2022-09-15	12:25:18	0.721743	333.513	FALSE	7
2022-09-15	12:25:18	0.731565	334.245	FALSE	7
2022-09-15	12:25:18	0.715992	334.961	FALSE	7
2022-09-15	12:25:18	0.691005	335.652	FALSE	7
2022-09-15	12:25:19	0.740929	336.393	FALSE	7
2022-09-15	12:25:19	0.733346	337.126	FALSE	7
2022-09-15	12:25:19	0.734211	337.86	FALSE	7
2022-09-15	12:25:19	0.732328	338.592	FALSE	7
2022-09-15	12:25:20	0.728562	339.321	FALSE	7
2022-09-15	12:25:20	0.734211	340.055	FALSE	7
2022-09-15	12:25:20	0.734008	340.789	FALSE	7
2022-09-15	12:25:21	0.735789	341.525	FALSE	7
2022-09-15	12:25:21	0.740064	342.265	FALSE	7
2022-09-15	12:25:21	0.731158	342.996	FALSE	7
2022-09-15	12:25:21	0.733855	343.73	FALSE	7
2022-09-15	12:25:22	0.737468	344.468	FALSE	7
2022-09-15	12:25:22	0.73701	345.205	FALSE	7
2022-09-15	12:25:22	0.733906	345.939	FALSE	7
2022-09-15	12:25:22	0.729733	346.668	FALSE	7
2022-09-15	12:25:23	0.735483	347.404	FALSE	7
2022-09-15	12:25:23	0.732786	348.137	FALSE	7
2022-09-15	12:25:23	0.737519	348.874	FALSE	7
2022-09-15	12:25:23	0.731412	349.605	FALSE	7
2022-09-15	12:25:24	0.740929	350.346	FALSE	7
2022-09-15	12:25:24	0.727596	351.074	FALSE	7
2022-09-15	12:25:24	0.73355	351.808	FALSE	7
2022-09-15	12:25:25	0.736196	352.544	FALSE	7
2022-09-15	12:25:25	0.734313	353.278	FALSE	7
2022-09-15	12:25:25	0.734211	354.012	FALSE	7
2022-09-15	12:25:25	0.733041	354.745	FALSE	7
2022-09-15	12:25:26	0.736247	355.482	FALSE	7
2022-09-15	12:25:26	0.727901	356.209	FALSE	7
2022-09-15	12:25:26	0.736043	356.945	FALSE	7
2022-09-15	12:25:26	0.731717	357.677	FALSE	7
2022-09-15	12:25:27	0.729326	358.407	FALSE	7
2022-09-15	12:25:27	0.737214	359.144	FALSE	7
2022-09-15	12:25:27	0.730242	359.874	FALSE	7
2022-09-15	12:25:27	0.730089	360.604	FALSE	7
2022-09-15	12:25:28	0.728664	361.333	FALSE	7
2022-09-15	12:25:28	0.732125	362.065	FALSE	7
2022-09-15	12:25:28	0.730547	362.795	FALSE	7
2022-09-15	12:25:29	0.73472	363.53	FALSE	7
2022-09-15	12:25:29	0.733295	364.263	FALSE	7
2022-09-15	12:25:29	0.73299	364.996	FALSE	7
2022-09-15	12:25:29	0.734262	365.731	FALSE	7
2022-09-15	12:25:30	0.726883	366.458	FALSE	7
2022-09-15	12:25:30	0.733906	367.191	FALSE	7
2022-09-15	12:25:30	0.735636	367.927	FALSE	7
2022-09-15	12:25:30	0.732023	368.659	FALSE	7
2022-09-15	12:25:31	0.735687	369.395	FALSE	7
2022-09-15	12:25:31	0.733651	370.128	FALSE	7
2022-09-15	12:25:31	0.728257	370.857	FALSE	7
2022-09-15	12:25:31	0.730089	371.587	FALSE	7
2022-09-15	12:25:32	0.730293	372.317	FALSE	7
2022-09-15	12:25:32	1.36373	373.681	FALSE	7
2022-09-15	12:25:32	0.728613	374.409	FALSE	7
2022-09-15	12:25:33	0.728562	375.138	FALSE	7
2022-09-15	12:25:33	0.724847	375.863	FALSE	7
2022-09-15	12:25:33	0.724746	376.588	FALSE	7
2022-09-15	12:25:33	0.73131	377.319	FALSE	7
2022-09-15	12:25:34	0.733397	378.052	FALSE	7
2022-09-15	12:25:34	0.72958	378.782	FALSE	7
2022-09-15	12:25:34	0.725763	379.508	FALSE	7
2022-09-15	12:25:34	0.735026	380.243	FALSE	7
2022-09-15	12:25:35	0.726985	380.97	FALSE	7
2022-09-15	12:25:35	0.733804	381.703	FALSE	7
2022-09-15	12:25:35	0.734313	382.438	FALSE	7
2022-09-15	12:25:35	0.728562	383.166	FALSE	7
2022-09-15	12:25:36	0.73584	383.902	FALSE	7
2022-09-15	12:25:36	0.728054	384.63	FALSE	7
2022-09-15	12:25:36	0.73243	385.363	FALSE	7
2022-09-15	12:25:37	0.725254	386.088	FALSE	7
2022-09-15	12:25:37	0.729631	386.818	FALSE	7
2022-09-15	12:25:37	0.72958	387.547	FALSE	7
2022-09-15	12:25:37	0.731209	388.278	FALSE	7
2022-09-15	12:25:38	2.19212	390.47	FALSE	7
2022-09-15	12:25:38	0.736298	391.207	FALSE	7
2022-09-15	12:25:38	0.729071	391.936	FALSE	7
2022-09-15	12:25:38	0.946221	392.882	FALSE	7
2022-09-15	12:25:39	0.901438	393.783	FALSE	7
2022-09-15	12:25:39	0.731667	394.515	FALSE	7
2022-09-15	12:25:39	0.740216	395.255	FALSE	7
2022-09-15	12:25:39	1.51172	396.767	FALSE	7
2022-09-15	12:25:40	0.730801	397.498	FALSE	7
2022-09-15	12:25:40	0.730445	398.228	FALSE	7
2022-09-15	12:25:40	0.896348	399.125	FALSE	7
2022-09-15	12:25:41	0.736501	399.861	FALSE	7
2022-09-15	12:25:41	0.727748	400.589	FALSE	7
2022-09-15	12:25:41	0.73416	401.323	FALSE	7
2022-09-15	12:25:41	0.862099	402.185	FALSE	7
2022-09-15	12:25:42	2.32836	404.514	FALSE	7
2022-09-15	12:25:42	2.43085	406.944	FALSE	7
2022-09-15	12:25:42	2.73828	409.683	FALSE	7
2022-09-15	12:25:42	2.02312	411.706	FALSE	7
2022-09-15	12:25:43	3.51284	415.219	1	8
2022-09-15	12:25:43	1.74144	416.96	FALSE	8
2022-09-15	12:25:43	1.9764	418.936	FALSE	8
2022-09-15	12:25:43	0.866679	419.803	FALSE	8
2022-09-15	12:25:44	0.728919	420.532	FALSE	8
2022-09-15	12:25:44	0.73757	421.27	FALSE	8
2022-09-15	12:25:44	0.738486	422.008	FALSE	8
2022-09-15	12:25:45	0.732583	422.741	FALSE	8
2022-09-15	12:25:45	0.735891	423.477	FALSE	8
2022-09-15	12:25:45	4.19507	427.672	1	9
2022-09-15	12:25:45	0.800013	428.472	FALSE	9
2022-09-15	12:25:46	1.40775	429.879	FALSE	9
2022-09-15	12:25:46	1.09996	430.979	FALSE	9
2022-09-15	12:25:46	1.85197	432.831	FALSE	9
2022-09-15	12:25:46	1.28922	434.121	FALSE	9
2022-09-15	12:25:47	1.18581	435.306	FALSE	9
2022-09-15	12:25:47	0.763931	436.07	FALSE	9
2022-09-15	12:25:47	0.731717	436.802	FALSE	9
2022-09-15	12:25:47	0.72897	437.531	FALSE	9
2022-09-15	12:25:48	0.813041	438.344	FALSE	9
2022-09-15	12:25:48	0.442252	438.786	FALSE	9
2022-09-15	12:25:48	0.711514	439.498	FALSE	9
2022-09-15	12:25:49	0.743982	440.242	FALSE	9
2022-09-15	12:25:49	0.365407	440.607	FALSE	9
2022-09-15	12:25:49	0.962201	441.569	FALSE	9
2022-09-15	12:25:49	0.307443	441.877	FALSE	9
2022-09-15	12:25:50	0.0234735	441.9	FALSE	9
2022-09-15	12:25:50	0.664033	442.564	FALSE	9
2022-09-15	12:25:50	0.73813	443.302	FALSE	9
2022-09-15	12:25:50	0.732532	444.035	FALSE	9
2022-09-15	12:25:51	0.729173	444.764	FALSE	9
2022-09-15	12:25:51	0.712532	445.477	FALSE	9
2022-09-15	12:25:51	0.608359	446.085	FALSE	9
2022-09-15	12:25:51	0.189377	446.274	FALSE	9
2022-09-15	12:25:52	-0.0198344	446.274	FALSE	9
2022-09-15	12:25:52	-0.107417	446.274	FALSE	9
2022-09-15	12:25:52	0.0074939	446.282	FALSE	9
2022-09-15	12:25:53	-0.113269	446.282	FALSE	9
2022-09-15	12:25:53	-0.0533712	446.282	FALSE	9
2022-09-15	12:25:53	0.0684099	446.35	FALSE	9
2022-09-15	12:25:53	0.320166	446.671	FALSE	9
2022-09-15	12:25:54	0.364491	447.035	FALSE	9
2022-09-15	12:25:54	0.283779	447.319	FALSE	9
2022-09-15	12:25:54	0.271718	447.591	FALSE	9
2022-09-15	12:25:54	0.330038	447.921	FALSE	9
2022-09-15	12:25:55	0.663779	448.584	FALSE	9
2022-09-15	12:25:55	0.443321	449.028	FALSE	9
2022-09-15	12:25:55	0.720165	449.748	FALSE	9
2022-09-15	12:25:55	0.470344	450.218	FALSE	9
2022-09-15	12:25:56	0.461285	450.679	FALSE	9
2022-09-15	12:25:56	0.475992	451.155	FALSE	9
2022-09-15	12:25:56	0.44388	451.599	FALSE	9
2022-09-15	12:25:57	0.452227	452.052	FALSE	9
2022-09-15	12:25:57	0.431769	452.483	FALSE	9
2022-09-15	12:25:57	0.442048	452.925	FALSE	9
2022-09-15	12:25:57	0.437265	453.363	FALSE	9
2022-09-15	12:25:58	0.451056	453.814	FALSE	9
2022-09-15	12:25:58	0.454669	454.268	FALSE	9
2022-09-15	12:25:58	0.456654	454.725	FALSE	9
2022-09-15	12:25:58	0.462965	455.188	FALSE	9
2022-09-15	12:25:59	0.465458	455.653	FALSE	9
2022-09-15	12:25:59	0.45645	456.11	FALSE	9
2022-09-15	12:25:59	0.459657	456.57	FALSE	9
2022-09-15	12:25:59	0.462099	457.032	FALSE	9
2022-09-15	12:26:00	0.457417	457.489	FALSE	9
2022-09-15	12:26:00	0.453346	457.942	FALSE	9
2022-09-15	12:26:00	0.431056	458.373	FALSE	9
2022-09-15	12:26:01	0.405814	458.779	FALSE	9
2022-09-15	12:26:01	0.394313	459.174	FALSE	9
2022-09-15	12:26:01	0.394059	459.568	FALSE	9
2022-09-15	12:26:01	0.392074	459.96	FALSE	9
2022-09-15	12:26:02	0.392532	460.352	FALSE	9
2022-09-15	12:26:02	0.394262	460.747	FALSE	9
2022-09-15	12:26:02	0.396298	461.143	FALSE	9
2022-09-15	12:26:02	0.399962	461.543	FALSE	9
2022-09-15	12:26:03	0.412023	461.955	FALSE	9
2022-09-15	12:26:03	0.405051	462.36	FALSE	9
2022-09-15	12:26:03	0.410598	462.77	FALSE	9
2022-09-15	12:26:04	0.418486	463.189	FALSE	9
2022-09-15	12:26:04	0.420776	463.61	FALSE	9
2022-09-15	12:26:04	0.423982	464.034	FALSE	9
2022-09-15	12:26:04	0.424491	464.458	FALSE	9
2022-09-15	12:26:05	0.432685	464.891	FALSE	9
2022-09-15	12:26:05	0.428868	465.32	FALSE	9
2022-09-15	12:26:05	0.426374	465.746	FALSE	9
2022-09-15	12:26:05	0.447494	466.194	FALSE	9
2022-09-15	12:26:06	0.478486	466.672	FALSE	9
2022-09-15	12:26:06	0.434211	467.106	FALSE	9
2022-09-15	12:26:06	0.426171	467.532	FALSE	9
2022-09-15	12:26:06	0.363524	467.896	FALSE	9
2022-09-15	12:26:07	0.380267	468.276	FALSE	9
2022-09-15	12:26:07	0.378181	468.654	FALSE	9
2022-09-15	12:26:07	0.404542	469.059	FALSE	9
2022-09-15	12:26:07	0.346069	469.405	FALSE	9
2022-09-15	12:26:08	0.314466	469.72	FALSE	9
2022-09-15	12:26:08	0.310344	470.03	FALSE	9
2022-09-15	12:26:08	0.322405	470.352	FALSE	9
2022-09-15	12:26:09	0.342863	470.695	FALSE	9
2022-09-15	12:26:09	0.332074	471.027	FALSE	9
2022-09-15	12:26:09	0.317824	471.345	FALSE	9
2022-09-15	12:26:09	0.31299	471.658	FALSE	9
2022-09-15	12:26:10	0.291107	471.949	FALSE	9
2022-09-15	12:26:10	0.281489	472.231	FALSE	9
2022-09-15	12:26:10	0.288715	472.519	FALSE	9
2022-09-15	12:26:10	0.272939	472.792	FALSE	9
2022-09-15	12:26:11	0.280064	473.072	FALSE	9
2022-09-15	12:26:11	0.27757	473.35	FALSE	9
2022-09-15	12:26:11	0.28215	473.632	FALSE	9
2022-09-15	12:26:11	0.286628	473.919	FALSE	9
2022-09-15	12:26:12	0.285611	474.204	FALSE	9
2022-09-15	12:26:12	0.290802	474.495	FALSE	9
2022-09-15	12:26:12	0.300064	474.795	FALSE	9
2022-09-15	12:26:13	0.328664	475.124	FALSE	9
2022-09-15	12:26:13	0.416349	475.54	FALSE	9
2022-09-15	12:26:13	0.434313	475.974	FALSE	9
2022-09-15	12:26:13	0.383422	476.358	FALSE	9
2022-09-15	12:26:14	0.184237	476.542	FALSE	9
2022-09-15	12:26:14	-0.002786	476.542	FALSE	9
2022-09-15	12:26:14	-0.192964	476.542	FALSE	9
2022-09-15	12:26:14	-0.0983076	476.542	FALSE	9
2022-09-15	12:26:15	-0.182888	476.542	FALSE	9
2022-09-15	12:26:15	-0.224109	476.542	FALSE	9
2022-09-15	12:26:15	-0.938816	476.542	FALSE	9
2022-09-15	12:26:15	-0.473218	476.542	FALSE	9
2022-09-15	12:26:16	-0.544872	476.542	FALSE	9
2022-09-15	12:26:16	-0.93047	476.542	FALSE	9
2022-09-15	12:26:16	-1.33953	476.542	FALSE	9
2022-09-15	12:26:17	-1.14472	476.542	FALSE	9
2022-09-15	12:26:17	-1.23469	476.542	FALSE	9
2022-09-15	12:26:17	-1.06452	476.542	FALSE	9
2022-09-15	12:26:17	-1.29647	476.542	FALSE	9
2022-09-15	12:26:18	-1.26009	476.542	FALSE	9
2022-09-15	12:26:18	-0.749961	476.542	FALSE	9
2022-09-15	12:26:18	-0.700852	476.542	FALSE	9
2022-09-15	12:26:18	-0.591946	476.542	FALSE	9
2022-09-15	12:26:19	-0.633015	476.542	FALSE	9
2022-09-15	12:26:19	-0.503193	476.542	FALSE	9
2022-09-15	12:26:19	-0.357798	476.542	FALSE	9
2022-09-15	12:26:19	-0.33276	476.542	FALSE	9
2022-09-15	12:26:20	-0.0280786	476.542	FALSE	9
2022-09-15	12:26:20	-0.0772898	476.542	FALSE	9
2022-09-15	12:26:20	0.346985	476.889	FALSE	9
2022-09-15	12:26:21	0.21925	477.108	FALSE	9
2022-09-15	12:26:21	0.606832	477.715	FALSE	9
2022-09-15	12:26:21	0.576196	478.291	FALSE	9
2022-09-15	12:26:21	0.494313	478.786	FALSE	9
2022-09-15	12:26:22	0.510343	479.296	FALSE	9
2022-09-15	12:26:22	0.516399	479.812	FALSE	9
2022-09-15	12:26:22	0.796501	480.609	FALSE	9
2022-09-15	12:26:22	5.58088	486.19	1	10
2022-09-15	12:26:23	1.24184	487.432	FALSE	10
2022-09-15	12:26:23	1.4594	488.891	FALSE	10
2022-09-15	12:26:23	0.885254	489.776	FALSE	10
2022-09-15	12:26:23	0.308104	490.084	FALSE	10
2022-09-15	12:26:24	0.19014	490.275	FALSE	10
2022-09-15	12:26:24	0.379351	490.654	FALSE	10
2022-09-15	12:26:24	0.39243	491.046	FALSE	10
2022-09-15	12:26:25	1.36184	492.408	FALSE	10
2022-09-15	12:26:25	4.30663	496.715	1	11
2022-09-15	12:26:25	4.36678	501.082	1	12
2022-09-15	12:26:25	0.957621	502.039	FALSE	12
2022-09-15	12:26:26	0.22444	502.264	FALSE	12
2022-09-15	12:26:26	0.298181	502.562	FALSE	12
2022-09-15	12:26:26	0.326527	502.888	FALSE	12
2022-09-15	12:26:26	0.197061	503.085	FALSE	12
2022-09-15	12:26:27	0.249631	503.335	FALSE	12
2022-09-15	12:26:27	0.00983486	503.345	FALSE	12
2022-09-15	12:26:27	0.155535	503.5	FALSE	12
2022-09-15	12:26:28	-0.0853814	503.5	FALSE	12
2022-09-15	12:26:28	0.213804	503.714	FALSE	12
2022-09-15	12:26:28	0.220267	503.935	FALSE	12
2022-09-15	12:26:28	0.601692	504.536	FALSE	12
2022-09-15	12:26:29	0.594466	505.131	FALSE	12
2022-09-15	12:26:29	0.705407	505.836	FALSE	12
2022-09-15	12:26:29	6.41848	512.255	1	13
2022-09-15	12:26:29	8.37273	520.627	1	14
2022-09-15	12:26:30	3.32739	523.955	1	15
2022-09-15	12:26:30	1.50866	525.463	FALSE	15
2022-09-15	12:26:30	0.512176	525.976	FALSE	15
2022-09-15	12:26:30	0.949428	526.925	FALSE	15
2022-09-15	12:26:31	1.41788	528.343	FALSE	15
2022-09-15	12:26:31	2.31518	530.658	FALSE	15
2022-09-15	12:26:31	5.65441	536.312	1	16
2022-09-15	12:26:31	2.75197	539.064	FALSE	16
2022-09-15	12:26:32	1.61798	540.682	FALSE	16
2022-09-15	12:26:32	0.667697	541.35	FALSE	16
2022-09-15	12:26:32	0.748766	542.099	FALSE	16
2022-09-15	12:26:33	0.648104	542.747	FALSE	16
2022-09-15	12:26:33	0.491361	543.238	FALSE	16
2022-09-15	12:26:33	0.584847	543.823	FALSE	16
2022-09-15	12:26:33	0.459504	544.283	FALSE	16
2022-09-15	12:26:34	0.61701	544.9	FALSE	16
2022-09-15	12:26:34	0.408512	545.308	FALSE	16
2022-09-15	12:26:34	0.621743	545.93	FALSE	16
2022-09-15	12:26:34	0.38785	546.318	FALSE	16
2022-09-15	12:26:35	0.665051	546.983	FALSE	16
2022-09-15	12:26:35	0.352226	547.335	FALSE	16
2022-09-15	12:26:35	0.554975	547.89	FALSE	16
2022-09-15	12:26:35	0.377214	548.267	FALSE	16
2022-09-15	12:26:36	0.580318	548.848	FALSE	16
2022-09-15	12:26:36	0.473499	549.321	FALSE	16
2022-09-15	12:26:36	0.554211	549.875	FALSE	16
2022-09-15	12:26:37	0.490293	550.366	FALSE	16
2022-09-15	12:26:37	0.534924	550.9	FALSE	16
2022-09-15	12:26:37	0.48612	551.387	FALSE	16
2022-09-15	12:26:37	0.51813	551.905	FALSE	16
2022-09-15	12:26:38	0.540063	552.445	FALSE	16
2022-09-15	12:26:38	0.476501	552.921	FALSE	16
2022-09-15	12:26:38	0.51472	553.436	FALSE	16
2022-09-15	12:26:38	0.547952	553.984	FALSE	16
2022-09-15	12:26:39	0.55355	554.537	FALSE	16
2022-09-15	12:26:39	0.488359	555.026	FALSE	16
2022-09-15	12:26:39	0.505509	555.531	FALSE	16
2022-09-15	12:26:39	0.51472	556.046	FALSE	16
2022-09-15	12:26:40	0.547086	556.593	FALSE	16
2022-09-15	12:26:40	0.524644	557.118	FALSE	16
2022-09-15	12:26:40	0.503677	557.621	FALSE	16
2022-09-15	12:26:41	0.503219	558.125	FALSE	16
2022-09-15	12:26:41	0.555382	558.68	FALSE	16
2022-09-15	12:26:41	0.482405	559.162	FALSE	16
2022-09-15	12:26:41	0.531209	559.694	FALSE	16
2022-09-15	12:26:42	0.514517	560.208	FALSE	16
2022-09-15	12:26:42	0.561336	560.77	FALSE	16
2022-09-15	12:26:42	0.517723	561.287	FALSE	16
2022-09-15	12:26:42	0.495993	561.783	FALSE	16
2022-09-15	12:26:43	0.505713	562.289	FALSE	16
2022-09-15	12:26:43	0.53528	562.824	FALSE	16
2022-09-15	12:26:43	0.504491	563.329	FALSE	16
2022-09-15	12:26:43	0.519046	563.848	FALSE	16
2022-09-15	12:26:44	0.500063	564.348	FALSE	16
2022-09-15	12:26:44	0.608206	564.956	FALSE	16
2022-09-15	12:26:44	0.388104	565.344	FALSE	16
2022-09-15	12:26:45	0.550954	565.895	FALSE	16
2022-09-15	12:26:45	0.403677	566.299	FALSE	16
2022-09-15	12:26:45	0.592837	566.892	FALSE	16
2022-09-15	12:26:45	0.422252	567.314	FALSE	16
2022-09-15	12:26:46	0.511667	567.826	FALSE	16
2022-09-15	12:26:46	0.459453	568.285	FALSE	16
2022-09-15	12:26:46	0.629885	568.915	FALSE	16
2022-09-15	12:26:46	0.544186	569.459	FALSE	16
2022-09-15	12:26:47	0.346272	569.805	FALSE	16
2022-09-15	12:26:47	0.124797	569.93	FALSE	16
2022-09-15	12:26:47	-0.186552	569.93	FALSE	16
2022-09-15	12:26:47	0.0119723	569.942	FALSE	16
2022-09-15	12:26:48	-0.0994781	569.942	FALSE	16
2022-09-15	12:26:48	0.0794022	570.022	FALSE	16
2022-09-15	12:26:48	-0.152455	570.022	FALSE	16
2022-09-15	12:26:49	-0.0899106	570.022	FALSE	16
2022-09-15	12:26:49	-0.222328	570.022	FALSE	16
2022-09-15	12:26:49	-0.224364	570.022	FALSE	16
2022-09-15	12:26:49	-0.417493	570.022	FALSE	16
2022-09-15	12:26:50	-0.357493	570.022	FALSE	16
2022-09-15	12:26:50	-0.350877	570.022	FALSE	16
2022-09-15	12:26:50	-0.288638	570.022	FALSE	16
2022-09-15	12:26:50	-0.302023	570.022	FALSE	16
2022-09-15	12:26:51	-0.167773	570.022	FALSE	16
2022-09-15	12:26:51	-0.204007	570.022	FALSE	16
2022-09-15	12:26:51	-0.225839	570.022	FALSE	16
2022-09-15	12:26:51	-0.300292	570.022	FALSE	16
2022-09-15	12:26:52	-0.149656	570.022	FALSE	16
2022-09-15	12:26:52	-0.211081	570.022	FALSE	16
2022-09-15	12:26:52	-0.156628	570.022	FALSE	16
2022-09-15	12:26:53	-0.217392	570.022	FALSE	16
2022-09-15	12:26:53	-0.111539	570.022	FALSE	16
2022-09-15	12:26:53	-0.129503	570.022	FALSE	16
2022-09-15	12:26:53	-0.0426333	570.022	FALSE	16
2022-09-15	12:26:54	-0.147163	570.022	FALSE	16
2022-09-15	12:26:54	-0.0571371	570.022	FALSE	16
2022-09-15	12:26:54	-0.135356	570.022	FALSE	16
2022-09-15	12:26:54	0.108766	570.13	FALSE	16
2022-09-15	12:26:55	-0.0723534	570.13	FALSE	16
2022-09-15	12:26:55	0.182354	570.313	FALSE	16
2022-09-15	12:26:55	-0.055356	570.313	FALSE	16
2022-09-15	12:26:55	0.0385371	570.351	FALSE	16
2022-09-15	12:26:56	0.033957	570.385	FALSE	16
2022-09-15	12:26:56	0.0138552	570.399	FALSE	16
2022-09-15	12:26:56	0.0937534	570.493	FALSE	16
2022-09-15	12:26:57	0.0810307	570.574	FALSE	16
2022-09-15	12:26:57	0.11528	570.689	FALSE	16
2022-09-15	12:26:57	0.0428628	570.732	FALSE	16
2022-09-15	12:26:57	0.16841	570.9	FALSE	16
2022-09-15	12:26:58	0.0706491	570.971	FALSE	16
2022-09-15	12:26:58	0.0438806	571.015	FALSE	16
2022-09-15	12:26:58	-0.145178	571.015	FALSE	16
2022-09-15	12:26:58	-0.136832	571.015	FALSE	16
2022-09-15	12:26:59	-0.157493	571.015	FALSE	16
2022-09-15	12:26:59	0.663422	571.678	FALSE	16
2022-09-15	12:26:59	1.642	573.32	FALSE	16
2022-09-15	12:26:59	0.548359	573.869	FALSE	16
2022-09-15	12:27:00	0.365814	574.234	FALSE	16
2022-09-15	12:27:00	0.534008	574.768	FALSE	16
2022-09-15	12:27:00	0.109529	574.878	FALSE	16
2022-09-15	12:27:01	0.4707	575.349	FALSE	16
2022-09-15	12:27:01	0.751107	576.1	FALSE	16
2022-09-15	12:27:01	2.02032	578.12	FALSE	16
2022-09-15	12:27:01	0.0750257	578.195	FALSE	16
2022-09-15	12:27:02	-0.0151524	578.195	FALSE	16
2022-09-15	12:27:02	-0.108689	578.195	FALSE	16
2022-09-15	12:27:02	-0.123804	578.195	FALSE	16
2022-09-15	12:27:02	-0.255712	578.195	FALSE	16
2022-09-15	12:27:03	-0.0623789	578.195	FALSE	16
2022-09-15	12:27:03	-0.116476	578.195	FALSE	16
2022-09-15	12:27:03	-0.121208	578.195	FALSE	16
2022-09-15	12:27:03	-0.240649	578.195	FALSE	16
2022-09-15	12:27:04	-0.102328	578.195	FALSE	16
2022-09-15	12:27:04	-0.147519	578.195	FALSE	16
2022-09-15	12:27:04	-0.0879259	578.195	FALSE	16
2022-09-15	12:27:05	-0.144364	578.195	FALSE	16
2022-09-15	12:27:05	0.0208781	578.216	FALSE	16
2022-09-15	12:27:05	0.0597076	578.276	FALSE	16
2022-09-15	12:27:05	0.102252	578.378	FALSE	16
2022-09-15	12:27:06	0.193295	578.571	FALSE	16
2022-09-15	12:27:06	0.126222	578.698	FALSE	16
2022-09-15	12:27:06	0.293143	578.991	FALSE	16
2022-09-15	12:27:06	0.295942	579.287	FALSE	16
2022-09-15	12:27:07	0.696654	579.983	FALSE	16
2022-09-15	12:27:07	1.18093	581.164	FALSE	16
2022-09-15	12:27:07	1.71431	582.878	FALSE	16
2022-09-15	12:27:07	0.819046	583.698	FALSE	16
2022-09-15	12:27:08	0.729478	584.427	FALSE	16
2022-09-15	12:27:08	0.294262	584.721	FALSE	16
2022-09-15	12:27:08	0.485255	585.207	FALSE	16
2022-09-15	12:27:09	0.473652	585.68	FALSE	16
2022-09-15	12:27:09	0.503371	586.184	FALSE	16
2022-09-15	12:27:09	1.10439	587.288	FALSE	16
2022-09-15	12:27:09	2.03813	589.326	FALSE	16
2022-09-15	12:27:10	1.63859	590.965	FALSE	16
2022-09-15	12:27:10	1.25752	592.222	FALSE	16
2022-09-15	12:27:10	1.78826	594.01	FALSE	16
2022-09-15	12:27:10	1.7448	595.755	FALSE	16
2022-09-15	12:27:11	1.52902	597.284	FALSE	16
2022-09-15	12:27:11	3.23569	600.52	1	17
2022-09-15	12:27:11	2.62708	603.147	FALSE	17
2022-09-15	12:27:11	1.70174	604.849	FALSE	17
2022-09-15	12:27:12	0.656552	605.505	FALSE	17
2022-09-15	12:27:12	0.934924	606.44	FALSE	17
2022-09-15	12:27:12	1.42108	607.861	FALSE	17
2022-09-15	12:27:13	2.20683	610.068	FALSE	17
2022-09-15	12:27:13	3.49681	613.565	1	18
2022-09-15	12:27:13	3.16719	616.732	1	19
2022-09-15	12:27:13	4.98362	621.716	1	20
2022-09-15	12:27:14	3.69075	625.407	1	21
2022-09-15	12:27:14	4.74658	630.153	1	22
2022-09-15	12:27:14	3.58826	633.741	1	23
2022-09-15	12:27:14	5.50993	639.251	1	24
2022-09-15	12:27:15	1.76378	641.015	FALSE	24
2022-09-15	12:27:15	3.13955	644.155	1	25
2022-09-15	12:27:15	3.03838	647.193	1	26
2022-09-15	12:27:15	3.25355	650.447	1	27
2022-09-15	12:27:16	2.54887	652.995	FALSE	27
2022-09-15	12:27:16	3.39645	656.392	1	28
2022-09-15	12:27:16	3.64897	660.041	1	29
2022-09-15	12:27:17	2.96118	663.002	FALSE	29
2022-09-15	12:27:17	1.85141	664.853	FALSE	29
2022-09-15	12:27:17	2.76332	667.617	FALSE	29
2022-09-15	12:27:17	4.64836	672.265	1	30
2022-09-15	12:27:18	6.2854	678.551	1	31
2022-09-15	12:27:18	6.77166	685.322	1	32
2022-09-15	12:27:18	6.35752	691.68	1	33
2022-09-15	12:27:18	6.83136	698.511	1	34
2022-09-15	12:27:19	6.35991	704.871	1	35
2022-09-15	12:27:19	2.00775	706.879	FALSE	35
2022-09-15	12:27:19	1.90653	708.785	FALSE	35
2022-09-15	12:27:19	0.759962	709.545	FALSE	35
2022-09-15	12:27:20	1.19752	710.743	FALSE	35
2022-09-15	12:27:20	2.19966	712.942	FALSE	35
2022-09-15	12:27:20	2.88602	715.828	FALSE	35
2022-09-15	12:27:21	1.08561	716.914	FALSE	35
2022-09-15	12:27:21	1.0595	717.974	FALSE	35
2022-09-15	12:27:21	1.86373	719.837	FALSE	35
2022-09-15	12:27:21	0.972735	720.81	FALSE	35
2022-09-15	12:27:22	0.737265	721.547	FALSE	35
2022-09-15	12:27:22	0.73299	722.28	FALSE	35
2022-09-15	12:27:22	1.67523	723.955	FALSE	35
2022-09-15	12:27:22	0.840929	724.796	FALSE	35
2022-09-15	12:27:23	3.7764	728.573	1	36
2022-09-15	12:27:23	3.15207	731.725	1	37
2022-09-15	12:27:23	5.54342	737.268	1	38
2022-09-15	12:27:23	9.60082	746.869	1	39
2022-09-15	12:27:24	8.51945	755.389	1	40
2022-09-15	12:27:24	2.85212	758.241	FALSE	40
2022-09-15	12:27:24	5.81405	764.055	1	41
2022-09-15	12:27:25	9.49029	773.545	1	42
2022-09-15	12:27:25	7.68143	781.226	1	43
2022-09-15	12:27:25	3.55553	784.782	1	44
2022-09-15	12:27:25	4.34408	789.126	1	45
2022-09-15	12:27:26	3.42077	792.547	1	46
2022-09-15	12:27:26	5.02316	797.57	1	47
2022-09-15	12:27:26	2.47462	800.045	FALSE	47
2022-09-15	12:27:26	2.54902	802.594	FALSE	47
2022-09-15	12:27:27	1.69849	804.292	FALSE	47
2022-09-15	12:27:27	4.09823	808.39	1	48
2022-09-15	12:27:27	6.73945	815.13	1	49
2022-09-15	12:27:27	3.90612	819.036	1	50
2022-09-15	12:27:28	2.55492	821.591	FALSE	50
2022-09-15	12:27:28	2.00525	823.596	FALSE	50
2022-09-15	12:27:28	1.6623	825.258	FALSE	50
2022-09-15	12:27:29	1.00296	826.261	FALSE	50
2022-09-15	12:27:29	1.50088	827.762	FALSE	50
2022-09-15	12:27:29	0.830038	828.592	FALSE	50
2022-09-15	12:27:29	0.232583	828.825	FALSE	50
2022-09-15	12:27:30	0.376807	829.202	FALSE	50
2022-09-15	12:27:30	0.816094	830.018	FALSE	50
2022-09-15	12:27:30	0.926578	830.944	FALSE	50
2022-09-15	12:27:30	1.46754	832.412	FALSE	50
2022-09-15	12:27:31	3.12642	835.538	1	51
2022-09-15	12:27:31	4.93385	840.472	1	52
2022-09-15	12:27:31	7.6882	848.16	1	53
2022-09-15	12:27:31	11.667	859.827	1	54
2022-09-15	12:27:32	8.58438	868.412	1	55
2022-09-15	12:27:32	8.34892	876.761	1	56
2022-09-15	12:27:32	10.3789	887.14	1	57
2022-09-15	12:27:33	5.33258	892.472	1	58
2022-09-15	12:27:33	2.34775	894.82	FALSE	58
2022-09-15	12:27:33	0.845356	895.665	FALSE	58
2022-09-15	12:27:33	0.356858	896.022	FALSE	58
2022-09-15	12:27:34	0.294567	896.317	FALSE	58
2022-09-15	12:27:34	0.583015	896.9	FALSE	58
2022-09-15	12:27:34	0.91126	897.811	FALSE	58
2022-09-15	12:27:34	0.510547	898.321	FALSE	58
2022-09-15	12:27:35	0.552227	898.874	FALSE	58
2022-09-15	12:27:35	0.564287	899.438	FALSE	58
2022-09-15	12:27:35	0.621387	900.059	FALSE	58
2022-09-15	12:27:35	1.0992	901.159	FALSE	58
2022-09-15	12:27:36	0.684389	901.843	FALSE	58
2022-09-15	12:27:36	0.599606	902.443	FALSE	58
2022-09-15	12:27:36	0.34612	902.789	FALSE	58
2022-09-15	12:27:37	0.51131	903.3	FALSE	58
2022-09-15	12:27:37	0.331769	903.632	FALSE	58
2022-09-15	12:27:37	0.443677	904.075	FALSE	58
2022-09-15	12:27:37	0.32327	904.399	FALSE	58
2022-09-15	12:27:38	0.468715	904.867	FALSE	58
2022-09-15	12:27:38	0.308715	905.176	FALSE	58
2022-09-15	12:27:38	0.480776	905.657	FALSE	58
2022-09-15	12:27:38	0.336603	905.994	FALSE	58
2022-09-15	12:27:39	0.570038	906.564	FALSE	58
2022-09-15	12:27:39	0.283473	906.847	FALSE	58
2022-09-15	12:27:39	0.512735	907.36	FALSE	58
2022-09-15	12:27:39	0.333753	907.694	FALSE	58
2022-09-15	12:27:40	0.616756	908.31	FALSE	58
2022-09-15	12:27:40	0.731056	909.041	FALSE	58
2022-09-15	12:27:40	0.730903	909.772	FALSE	58
2022-09-15	12:27:41	0.723473	910.496	FALSE	58
2022-09-15	12:27:41	0.756858	911.253	FALSE	58
2022-09-15	12:27:41	0.839097	912.092	FALSE	58
2022-09-15	12:27:41	1.23309	913.325	FALSE	58
2022-09-15	12:27:42	1.17467	914.499	FALSE	58
2022-09-15	12:27:42	1.5452	916.045	FALSE	58
2022-09-15	12:27:42	1.81462	917.859	FALSE	58
2022-09-15	12:27:42	1.58653	919.446	FALSE	58
2022-09-15	12:27:43	1.46541	920.911	FALSE	58
2022-09-15	12:27:43	1.13635	922.048	FALSE	58
2022-09-15	12:27:43	1.12337	923.171	FALSE	58
2022-09-15	12:27:43	0.904898	924.076	FALSE	58
2022-09-15	12:27:44	0.795076	924.871	FALSE	58
2022-09-15	12:27:44	0.538639	925.41	FALSE	58
2022-09-15	12:27:44	0.767596	926.177	FALSE	58
2022-09-15	12:27:44	0.484847	926.662	FALSE	58
2022-09-15	12:27:45	0.700776	927.363	FALSE	58
2022-09-15	12:27:45	0.740929	928.104	FALSE	58
2022-09-15	12:27:45	0.737214	928.841	FALSE	58
2022-09-15	12:27:46	0.726476	929.567	FALSE	58
2022-09-15	12:27:46	0.731616	930.299	FALSE	58
2022-09-15	12:27:46	0.366323	930.665	FALSE	58
2022-09-15	12:27:46	0.23187	930.897	FALSE	58
2022-09-15	12:27:47	0.28841	931.186	FALSE	58
2022-09-15	12:27:47	0.710751	931.896	FALSE	58
2022-09-15	12:27:47	0.700929	932.597	FALSE	58
2022-09-15	12:27:47	0.735127	933.332	FALSE	58

## Sheet: Tyr_prong_2022915122222
						**GoPro Fitting: 1211
2022-09-15	12:22:22	0.730547
2022-09-15	12:22:23	0.732786
2022-09-15	12:22:23	0.76271
2022-09-15	12:22:23	1.10475
2022-09-15	12:22:23	0.737621
2022-09-15	12:22:24	0.727545
2022-09-15	12:22:24	0.733804
2022-09-15	12:22:24	0.737977
2022-09-15	12:22:25	0.732328
2022-09-15	12:22:25	0.731209
2022-09-15	12:22:25	0.728257
2022-09-15	12:22:25	0.739606
2022-09-15	12:22:26	0.735229
2022-09-15	12:22:26	0.733448
2022-09-15	12:22:26	0.731107
2022-09-15	12:22:26	0.738384
2022-09-15	12:22:27	0.732023
2022-09-15	12:22:27	0.744542
2022-09-15	12:22:27	0.746272
2022-09-15	12:22:27	0.897774
2022-09-15	12:22:28	0.940522
2022-09-15	12:22:28	0.924338
2022-09-15	12:22:28	0.949886
2022-09-15	12:22:28	0.970852
2022-09-15	12:22:29	0.961234
2022-09-15	12:22:29	0.963015
2022-09-15	12:22:29	0.967952
2022-09-15	12:22:30	0.980471
2022-09-15	12:22:30	0.987239
2022-09-15	12:22:30	1.00846
2022-09-15	12:22:30	1.01823
2022-09-15	12:22:31	1.025
2022-09-15	12:22:31	1.01263
2022-09-15	12:22:31	1.04485
2022-09-15	12:22:31	1.03864
2022-09-15	12:22:32	1.06922
2022-09-15	12:22:32	1.08475
2022-09-15	12:22:32	1.16872
2022-09-15	12:22:32	1.15955
2022-09-15	12:22:33	1.16505
2022-09-15	12:22:33	1.16169
2022-09-15	12:22:33	1.18754
2022-09-15	12:22:34	1.21869
2022-09-15	12:22:34	1.23803
2022-09-15	12:22:34	1.24057
2022-09-15	12:22:34	1.25869
2022-09-15	12:22:35	1.24719
2022-09-15	12:22:35	1.25345
2022-09-15	12:22:35	1.31187
2022-09-15	12:22:35	0.508664
2022-09-15	12:22:36	0.208817
2022-09-15	12:22:36	0.152837
2022-09-15	12:22:36	0.141387
2022-09-15	12:22:36	0.171463
2022-09-15	12:22:37	0.284593
2022-09-15	12:22:37	0.305305
2022-09-15	12:22:37	0.186018
2022-09-15	12:22:38	0.0979264
2022-09-15	12:22:38	-0.0436511
2022-09-15	12:22:38	-0.041412
2022-09-15	12:22:38	-0.0215138
2022-09-15	12:22:39	0.229071
2022-09-15	12:22:39	0.0305982
2022-09-15	12:22:39	0.196552
2022-09-15	12:22:39	0.0602165
2022-09-15	12:22:40	0.414262
2022-09-15	12:22:40	0.176349
2022-09-15	12:22:40	0.433041
2022-09-15	12:22:40	0.192379
2022-09-15	12:22:41	0.610547
2022-09-15	12:22:41	0.3764
2022-09-15	12:22:41	0.413448
2022-09-15	12:22:42	0.363219
2022-09-15	12:22:42	0.324797
2022-09-15	12:22:42	0.306527
2022-09-15	12:22:42	0.346781
2022-09-15	12:22:43	0.0730918
2022-09-15	12:22:43	0.183626
2022-09-15	12:22:43	0.309937
2022-09-15	12:22:43	0.244491
2022-09-15	12:22:44	0.34271
2022-09-15	12:22:44	0.275331
2022-09-15	12:22:44	0.272176
2022-09-15	12:22:45	0.540267
2022-09-15	12:22:45	0.60159
2022-09-15	12:22:45	0.720165
2022-09-15	12:22:45	0.874619
2022-09-15	12:22:46	1.10296
2022-09-15	12:22:46	1.2366
2022-09-15	12:22:46	1.75385
2022-09-15	12:22:46	0.588766
2022-09-15	12:22:47	0.291921
2022-09-15	12:22:47	0.460929
2022-09-15	12:22:47	0.43757
2022-09-15	12:22:47	0.347646
2022-09-15	12:22:48	0.283779
2022-09-15	12:22:48	0.419453
2022-09-15	12:22:48	0.137672
2022-09-15	12:22:48	0.203881
2022-09-15	12:22:49	0.277723
2022-09-15	12:22:49	-0.0382568
2022-09-15	12:22:49	-0.221056
2022-09-15	12:22:50	-0.0268572
2022-09-15	12:22:50	0.205967
2022-09-15	12:22:50	0.472532
2022-09-15	12:22:50	0.131921
2022-09-15	12:22:51	0.324033
2022-09-15	12:22:51	0.216959
2022-09-15	12:22:51	0.533448
2022-09-15	12:22:51	0.199657
2022-09-15	12:22:52	0.369784
2022-09-15	12:22:52	0.18958
2022-09-15	12:22:52	0.268206
2022-09-15	12:22:53	0.252786
2022-09-15	12:22:53	0.287799
2022-09-15	12:22:53	0.323321
2022-09-15	12:22:53	0.220216
2022-09-15	12:22:54	0.28673
2022-09-15	12:22:54	0.182761
2022-09-15	12:22:54	0.109631
2022-09-15	12:22:54	-0.0304196
2022-09-15	12:22:55	-0.0661956
2022-09-15	12:22:55	-0.0920481
2022-09-15	12:22:55	-0.111437
2022-09-15	12:22:55	-0.448485
2022-09-15	12:22:56	-0.674287
2022-09-15	12:22:56	-0.350317
2022-09-15	12:22:56	0.133804
2022-09-15	12:22:56	0.262557
2022-09-15	12:22:57	0.49584
2022-09-15	12:22:57	0.294618
2022-09-15	12:22:57	0.435026
2022-09-15	12:22:58	0.412074
2022-09-15	12:22:58	0.508257
2022-09-15	12:22:58	0.349377
2022-09-15	12:22:58	0.354262
2022-09-15	12:22:59	0.371768
2022-09-15	12:22:59	0.315738
2022-09-15	12:22:59	0.26042
2022-09-15	12:22:59	0.328766
2022-09-15	12:23:00	0.730496
2022-09-15	12:23:00	0.638995
2022-09-15	12:23:00	-0.290267
2022-09-15	12:23:00	-0.597035
2022-09-15	12:23:01	-0.473524
2022-09-15	12:23:01	-0.246755
2022-09-15	12:23:01	-0.217748
2022-09-15	12:23:02	-0.324567
2022-09-15	12:23:02	-0.204872
2022-09-15	12:23:02	-0.297035
2022-09-15	12:23:02	-0.103244
2022-09-15	12:23:03	-0.330419
2022-09-15	12:23:03	-0.249911
2022-09-15	12:23:03	-0.286297
2022-09-15	12:23:03	-0.204211
2022-09-15	12:23:04	-0.31444
2022-09-15	12:23:04	-0.160954
2022-09-15	12:23:04	-0.214745
2022-09-15	12:23:05	-0.0844145
2022-09-15	12:23:05	-0.118257
2022-09-15	12:23:05	0.22612
2022-09-15	12:23:05	0.253651
2022-09-15	12:23:06	0.217519
2022-09-15	12:23:06	0.111667
2022-09-15	12:23:06	0.26327
2022-09-15	12:23:06	0.182303
2022-09-15	12:23:07	0.0645422
2022-09-15	12:23:07	0.0138043
2022-09-15	12:23:07	0.0498857
2022-09-15	12:23:07	0.00871527
2022-09-15	12:23:08	0.0312597
2022-09-15	12:23:08	0.0501401
2022-09-15	12:23:08	0.132583
2022-09-15	12:23:08	0.0722267
2022-09-15	12:23:09	-0.0947961
2022-09-15	12:23:09	0.0160435
2022-09-15	12:23:09	-0.00517788
2022-09-15	12:23:10	0.032074
2022-09-15	12:23:10	-0.100089
2022-09-15	12:23:10	0.0150765
2022-09-15	12:23:10	-0.00365114
2022-09-15	12:23:11	0.0140078
2022-09-15	12:23:11	-0.100445
2022-09-15	12:23:11	-0.0109794
2022-09-15	12:23:11	-0.00365114
2022-09-15	12:23:12	-0.112964
2022-09-15	12:23:12	0.0728883
2022-09-15	12:23:12	0.0559417
2022-09-15	12:23:12	0.26785
2022-09-15	12:23:13	0.172481
2022-09-15	12:23:13	0.230293
2022-09-15	12:23:13	0.066985
2022-09-15	12:23:14	0.234924
2022-09-15	12:23:14	0.167952
2022-09-15	12:23:14	0.028359
2022-09-15	12:23:14	0.257214
2022-09-15	12:23:15	0.00138701
2022-09-15	12:23:15	0.22159
2022-09-15	12:23:15	0.0583336
2022-09-15	12:23:15	0.182507
2022-09-15	12:23:16	-0.0133204
2022-09-15	12:23:16	0.123779
2022-09-15	12:23:16	0.133702
2022-09-15	12:23:16	0.411056
2022-09-15	12:23:17	0.156858
2022-09-15	12:23:17	0.112074
2022-09-15	12:23:17	0.0166033
2022-09-15	12:23:18	-0.0638038
2022-09-15	12:23:18	-0.227061
2022-09-15	12:23:18	-0.419936
2022-09-15	12:23:18	-0.315407
2022-09-15	12:23:19	-0.37215
2022-09-15	12:23:19	-0.399173
2022-09-15	12:23:19	-0.322175
2022-09-15	12:23:19	-0.231234
2022-09-15	12:23:20	-0.0713865
2022-09-15	12:23:20	-0.155661
2022-09-15	12:23:20	0.218588
2022-09-15	12:23:21	0.351667
2022-09-15	12:23:21	0.999504
2022-09-15	12:23:21	0.888461
2022-09-15	12:23:21	0.892939
2022-09-15	12:23:22	0.866527
2022-09-15	12:23:22	0.0975193
2022-09-15	12:23:22	0.221285
2022-09-15	12:23:22	0.322812
2022-09-15	12:23:23	-0.0326588
2022-09-15	12:23:23	0.0674429
2022-09-15	12:23:23	-0.0669081
2022-09-15	12:23:23	0.106629
2022-09-15	12:23:24	-0.118918
2022-09-15	12:23:24	-0.0494527
2022-09-15	12:23:24	0.0970612
2022-09-15	12:23:24	0.0130918
2022-09-15	12:23:25	0.140827
2022-09-15	12:23:25	0.177417
2022-09-15	12:23:25	0.214211
2022-09-15	12:23:26	0.137163
2022-09-15	12:23:26	0.136603
2022-09-15	12:23:26	0.124797
2022-09-15	12:23:26	0.113092
2022-09-15	12:23:27	0.0420994
2022-09-15	12:23:27	-0.176374
2022-09-15	12:23:27	-0.285687
2022-09-15	12:23:27	-0.0797325
2022-09-15	12:23:28	-0.128282
2022-09-15	12:23:28	-0.078104
2022-09-15	12:23:28	-0.0583585
2022-09-15	12:23:29	-0.0790201
2022-09-15	12:23:29	0.0280028
2022-09-15	12:23:29	-0.143448
2022-09-15	12:23:29	-0.000597729
2022-09-15	12:23:30	-0.12986
2022-09-15	12:23:30	-0.0656867
2022-09-15	12:23:30	-0.0502669
2022-09-15	12:23:30	-0.0675188
2022-09-15	12:23:31	0.178944
2022-09-15	12:23:31	-0.18131
2022-09-15	12:23:31	0.110293
2022-09-15	12:23:31	1.3309
2022-09-15	12:23:32	3.05691
2022-09-15	12:23:32	2.82317
2022-09-15	12:23:32	2.28851
2022-09-15	12:23:32	1.51396
2022-09-15	12:23:33	1.32164
2022-09-15	12:23:33	1.93604
2022-09-15	12:23:33	1.10327
2022-09-15	12:23:34	2.52607
2022-09-15	12:23:34	1.76607
2022-09-15	12:23:34	1.00632
2022-09-15	12:23:34	1.74337
2022-09-15	12:23:35	0.790344
2022-09-15	12:23:35	0.697163
2022-09-15	12:23:35	0.534109
2022-09-15	12:23:35	0.323117
2022-09-15	12:23:36	0.355178
2022-09-15	12:23:36	0.191972
2022-09-15	12:23:36	0.440166
2022-09-15	12:23:37	0.291311
2022-09-15	12:23:37	0.330649
2022-09-15	12:23:37	0.337214
2022-09-15	12:23:37	0.221285
2022-09-15	12:23:38	0.227443
2022-09-15	12:23:38	0.190089
2022-09-15	12:23:38	0.0715142
2022-09-15	12:23:38	-0.0401906
2022-09-15	12:23:39	-0.090674
2022-09-15	12:23:39	0.026985
2022-09-15	12:23:39	0.00556005
2022-09-15	12:23:39	0.0162979
2022-09-15	12:23:40	0.0261707
2022-09-15	12:23:40	-0.00100484
2022-09-15	12:23:40	-0.0374425
2022-09-15	12:23:41	-0.0997326
2022-09-15	12:23:41	-0.199529
2022-09-15	12:23:41	-0.284364
2022-09-15	12:23:41	-0.398918
2022-09-15	12:23:42	-0.292913
2022-09-15	12:23:42	-0.183549
2022-09-15	12:23:42	-0.169554
2022-09-15	12:23:42	-0.172455
2022-09-15	12:23:43	-0.103804
2022-09-15	12:23:43	-0.0555086
2022-09-15	12:23:43	-0.139478
2022-09-15	12:23:43	-0.0976969
2022-09-15	12:23:44	0.18785
2022-09-15	12:23:44	0.725153
2022-09-15	12:23:44	0.471107
2022-09-15	12:23:45	-0.058613
2022-09-15	12:23:45	-0.155712
2022-09-15	12:23:45	-0.0532694
2022-09-15	12:23:45	0.0204201
2022-09-15	12:23:46	0.156451
2022-09-15	12:23:46	0.285
2022-09-15	12:23:46	0.716145
2022-09-15	12:23:46	0.489071
2022-09-15	12:23:47	0.50841
2022-09-15	12:23:47	0.316298
2022-09-15	12:23:47	0.556348
2022-09-15	12:23:47	0.36154
2022-09-15	12:23:48	0.342659
2022-09-15	12:23:48	0.440674
2022-09-15	12:23:48	0.537621
2022-09-15	12:23:49	1.43192
2022-09-15	12:23:49	1.43538
2022-09-15	12:23:49	2.06724
2022-09-15	12:23:49	0.988868
2022-09-15	12:23:50	0.819555
2022-09-15	12:23:50	0.664949
2022-09-15	12:23:50	0.240522
2022-09-15	12:23:50	0.249275
2022-09-15	12:23:51	0.288003
2022-09-15	12:23:51	0.332176
2022-09-15	12:23:51	0.489886
2022-09-15	12:23:51	1.33492
2022-09-15	12:23:52	3.63945
2022-09-15	12:23:52	3.79395
2022-09-15	12:23:52	1.64627
2022-09-15	12:23:53	0.811666
2022-09-15	12:23:53	0.674262
2022-09-15	12:23:53	0.388919
2022-09-15	12:23:53	0.51869
2022-09-15	12:23:54	1.17141
2022-09-15	12:23:54	0.496247
2022-09-15	12:23:54	-0.0650761
2022-09-15	12:23:54	-0.109605
2022-09-15	12:23:55	-0.0797325
2022-09-15	12:23:55	-0.0302669
2022-09-15	12:23:55	0.255534
2022-09-15	12:23:55	0.431412
2022-09-15	12:23:56	0.242405
2022-09-15	12:23:56	0.42159
2022-09-15	12:23:56	0.382964
2022-09-15	12:23:57	0.449631
2022-09-15	12:23:57	0.479606
2022-09-15	12:23:57	0.385051
2022-09-15	12:23:57	0.435891
2022-09-15	12:23:58	0.427036
2022-09-15	12:23:58	0.380369
2022-09-15	12:23:58	0.290649
2022-09-15	12:23:59	0.323779
2022-09-15	12:23:59	0.355942
2022-09-15	12:23:59	0.555076
2022-09-15	12:23:59	0.668359
2022-09-15	12:23:59	0.470954
2022-09-15	12:24:00	0.727952
2022-09-15	12:24:00	0.347646
2022-09-15	12:24:00	0.296807
2022-09-15	12:24:01	0.266221
2022-09-15	12:24:01	0.217316
2022-09-15	12:24:01	0.202201
2022-09-15	12:24:01	0.181336
2022-09-15	12:24:02	0.147341
2022-09-15	12:24:02	0.118537
2022-09-15	12:24:02	0.102507
2022-09-15	12:24:02	0.108664
2022-09-15	12:24:03	0.107087
2022-09-15	12:24:03	0.101947
2022-09-15	12:24:03	0.114364
2022-09-15	12:24:03	0.131158
2022-09-15	12:24:04	0.136858
2022-09-15	12:24:04	0.115484
2022-09-15	12:24:04	0.107392
2022-09-15	12:24:05	0.139199
2022-09-15	12:24:05	0.175229
2022-09-15	12:24:05	0.0890714
2022-09-15	12:24:05	0.0269341
2022-09-15	12:24:06	0.0991478
2022-09-15	12:24:06	0.120674
2022-09-15	12:24:06	-0.0189183
2022-09-15	12:24:06	-0.0722516
2022-09-15	12:24:07	-0.137035
2022-09-15	12:24:07	-0.18818
2022-09-15	12:24:07	-0.194542
2022-09-15	12:24:07	-0.140343
2022-09-15	12:24:08	-0.216883
2022-09-15	12:24:08	-0.281412
2022-09-15	12:24:08	-0.071132
2022-09-15	12:24:09	0.0427611
2022-09-15	12:24:09	-0.183804
2022-09-15	12:24:09	-0.00619567
2022-09-15	12:24:09	0.683117
2022-09-15	12:24:10	1.88357
2022-09-15	12:24:10	1.48968
2022-09-15	12:24:10	1.18317
2022-09-15	12:24:10	0.297163
2022-09-15	12:24:11	0.368155
2022-09-15	12:24:11	0.293295
2022-09-15	12:24:11	-0.0555086
2022-09-15	12:24:11	-0.31276
2022-09-15	12:24:12	-0.215356
2022-09-15	12:24:12	-0.0295545
2022-09-15	12:24:12	0.034415
2022-09-15	12:24:13	0.144644
2022-09-15	12:24:13	0.14729
2022-09-15	12:24:13	0.169275
2022-09-15	12:24:13	0.263015
2022-09-15	12:24:14	0.115942
2022-09-15	12:24:14	0.021845
2022-09-15	12:24:14	0.0522776
2022-09-15	12:24:15	0.293448
2022-09-15	12:24:15	0.36673
2022-09-15	12:24:15	0.675127
2022-09-15	12:24:15	0.478639
2022-09-15	12:24:15	0.270547
2022-09-15	12:24:16	0.158944
2022-09-15	12:24:16	0.0909544
2022-09-15	12:24:16	0.0161961
2022-09-15	12:24:17	-0.0964246
2022-09-15	12:24:17	-0.225025
2022-09-15	12:24:17	-0.25103
2022-09-15	12:24:17	-0.294084
2022-09-15	12:24:18	-0.4122
2022-09-15	12:24:18	-0.640597
2022-09-15	12:24:18	-0.6865
2022-09-15	12:24:18	-0.893931
2022-09-15	12:24:19	-0.727264
2022-09-15	12:24:19	-0.88416
2022-09-15	12:24:19	-0.746246
2022-09-15	12:24:19	-0.592811
2022-09-15	12:24:20	0.163779
2022-09-15	12:24:20	1.90011
2022-09-15	12:24:20	3.22866
2022-09-15	12:24:21	5.36103
2022-09-15	12:24:21	3.77238
2022-09-15	12:24:21	4.38851
2022-09-15	12:24:21	1.41151
2022-09-15	12:24:22	0.390649
2022-09-15	12:24:22	0.634974
2022-09-15	12:24:22	0.441998
2022-09-15	12:24:22	0.0929391
2022-09-15	12:24:23	0.496094
2022-09-15	12:24:23	0.0928883
2022-09-15	12:24:23	0.617672
2022-09-15	12:24:23	0.590242
2022-09-15	12:24:24	0.806577
2022-09-15	12:24:24	0.761692
2022-09-15	12:24:24	0.446221
2022-09-15	12:24:25	0.685204
2022-09-15	12:24:25	0.720369
2022-09-15	12:24:25	0.258741
2022-09-15	12:24:25	0.564135
2022-09-15	12:24:26	0.480216
2022-09-15	12:24:26	0.42098
2022-09-15	12:24:26	0.504695
2022-09-15	12:24:26	0.240725
2022-09-15	12:24:27	0.763575
2022-09-15	12:24:27	0.384237
2022-09-15	12:24:27	0.604847
2022-09-15	12:24:27	0.706069
2022-09-15	12:24:28	0.728715
2022-09-15	12:24:28	0.723575
2022-09-15	12:24:28	0.486679
2022-09-15	12:24:29	0.674313
2022-09-15	12:24:29	0.732481
2022-09-15	12:24:29	0.659606
2022-09-15	12:24:29	0.573855
2022-09-15	12:24:30	0.726832
2022-09-15	12:24:30	0.733244
2022-09-15	12:24:30	0.731005
2022-09-15	12:24:30	0.688003
2022-09-15	12:24:31	0.730293
2022-09-15	12:24:31	0.733346
2022-09-15	12:24:31	0.728766
2022-09-15	12:24:31	0.723015
2022-09-15	12:24:32	0.73472
2022-09-15	12:24:32	0.728817
2022-09-15	12:24:32	0.734924
2022-09-15	12:24:33	0.730852
2022-09-15	12:24:33	0.726832
2022-09-15	12:24:33	0.727545
2022-09-15	12:24:33	0.735992
2022-09-15	12:24:34	0.728868
2022-09-15	12:24:34	0.729886
2022-09-15	12:24:34	0.720318
2022-09-15	12:24:34	0.733295
2022-09-15	12:24:35	0.734008
2022-09-15	12:24:35	0.732277
2022-09-15	12:24:35	0.727341
2022-09-15	12:24:35	0.730242
2022-09-15	12:24:36	0.731361
2022-09-15	12:24:36	0.736043
2022-09-15	12:24:36	0.727799
2022-09-15	12:24:37	0.727697
2022-09-15	12:24:37	0.730903
2022-09-15	12:24:37	0.727748
2022-09-15	12:24:37	0.727188
2022-09-15	12:24:38	0.734466
2022-09-15	12:24:38	0.734669
2022-09-15	12:24:38	0.731565
2022-09-15	12:24:38	0.73187
2022-09-15	12:24:39	0.733855
2022-09-15	12:24:39	0.729377
2022-09-15	12:24:39	0.73355
2022-09-15	12:24:39	0.734669
2022-09-15	12:24:40	0.736298
2022-09-15	12:24:40	0.73014
2022-09-15	12:24:40	0.728155
2022-09-15	12:24:41	0.728359
2022-09-15	12:24:41	0.72897
2022-09-15	12:24:41	0.733855
2022-09-15	12:24:41	0.731056
2022-09-15	12:24:42	0.736196
2022-09-15	12:24:42	0.732023
2022-09-15	12:24:42	0.730445
2022-09-15	12:24:42	0.723168
2022-09-15	12:24:43	0.73416
2022-09-15	12:24:43	0.736959
2022-09-15	12:24:43	0.735178
2022-09-15	12:24:43	0.729478
2022-09-15	12:24:44	0.729529
2022-09-15	12:24:44	0.735483
2022-09-15	12:24:44	0.739555
2022-09-15	12:24:45	0.738384
2022-09-15	12:24:45	0.725305
2022-09-15	12:24:45	0.732837
2022-09-15	12:24:45	0.731565
2022-09-15	12:24:46	0.737977
2022-09-15	12:24:46	0.734568
2022-09-15	12:24:46	0.732684
2022-09-15	12:24:46	0.731361
2022-09-15	12:24:47	0.734669
2022-09-15	12:24:47	0.729275
2022-09-15	12:24:47	0.731819
2022-09-15	12:24:47	0.72958
2022-09-15	12:24:48	0.738384
2022-09-15	12:24:48	0.727392
2022-09-15	12:24:48	0.734364
2022-09-15	12:24:49	0.729784
2022-09-15	12:24:49	0.731667
2022-09-15	12:24:49	0.727392
2022-09-15	12:24:49	0.731667
2022-09-15	12:24:50	0.734415
2022-09-15	12:24:50	0.731819
2022-09-15	12:24:50	0.734008
2022-09-15	12:24:50	0.734059
2022-09-15	12:24:51	0.731616
2022-09-15	12:24:51	0.727239
2022-09-15	12:24:51	0.731412
2022-09-15	12:24:51	0.731514
2022-09-15	12:24:52	0.731667
2022-09-15	12:24:52	0.732328
2022-09-15	12:24:52	0.734924
2022-09-15	12:24:53	0.734822
2022-09-15	12:24:53	0.732074
2022-09-15	12:24:53	0.727748
2022-09-15	12:24:53	0.730394
2022-09-15	12:24:54	0.728766
2022-09-15	12:24:54	0.730242
2022-09-15	12:24:54	0.730089
2022-09-15	12:24:54	0.728104
2022-09-15	12:24:55	0.726934
2022-09-15	12:24:55	0.732532
2022-09-15	12:24:55	0.73014
2022-09-15	12:24:55	0.732074
2022-09-15	12:24:56	0.734262
2022-09-15	12:24:56	0.737519
2022-09-15	12:24:56	0.730598
2022-09-15	12:24:57	0.734822
2022-09-15	12:24:57	0.729173
2022-09-15	12:24:57	0.732837
2022-09-15	12:24:57	0.730242
2022-09-15	12:24:58	0.732175
2022-09-15	12:24:58	0.727087
2022-09-15	12:24:58	0.731209
2022-09-15	12:24:58	0.724949
2022-09-15	12:24:59	0.731616
2022-09-15	12:24:59	0.735433
2022-09-15	12:24:59	0.73131
2022-09-15	12:24:59	0.733957
2022-09-15	12:25:00	0.729835
2022-09-15	12:25:00	0.736043
2022-09-15	12:25:00	0.737417
2022-09-15	12:25:01	0.735178
2022-09-15	12:25:01	0.728664
2022-09-15	12:25:01	0.732379
2022-09-15	12:25:01	0.732074
2022-09-15	12:25:02	0.741031
2022-09-15	12:25:02	0.727901
2022-09-15	12:25:02	0.729071
2022-09-15	12:25:02	0.728308
2022-09-15	12:25:03	0.728308
2022-09-15	12:25:03	0.72673
2022-09-15	12:25:03	0.728257
2022-09-15	12:25:03	0.730496
2022-09-15	12:25:04	0.736043
2022-09-15	12:25:04	0.73243
2022-09-15	12:25:04	0.730394
2022-09-15	12:25:05	0.716349
2022-09-15	12:25:05	0.730751
2022-09-15	12:25:05	0.730089
2022-09-15	12:25:05	0.733957
2022-09-15	12:25:06	0.731412
2022-09-15	12:25:06	0.732634
2022-09-15	12:25:06	0.729987
2022-09-15	12:25:06	0.732023
2022-09-15	12:25:07	0.733346
2022-09-15	12:25:07	0.728562
2022-09-15	12:25:07	0.736552
2022-09-15	12:25:07	0.730547
2022-09-15	12:25:08	0.734618
2022-09-15	12:25:08	0.733448
2022-09-15	12:25:08	0.732023
2022-09-15	12:25:09	0.735534
2022-09-15	12:25:09	0.733397
2022-09-15	12:25:09	0.730903
2022-09-15	12:25:09	0.738028
2022-09-15	12:25:10	0.735789
2022-09-15	12:25:10	0.733499
2022-09-15	12:25:10	0.738079
2022-09-15	12:25:10	0.73645
2022-09-15	12:25:11	0.731717
2022-09-15	12:25:11	0.728715
2022-09-15	12:25:11	0.737214
2022-09-15	12:25:11	0.73472
2022-09-15	12:25:12	0.735483
2022-09-15	12:25:12	0.735229
2022-09-15	12:25:12	0.735738
2022-09-15	12:25:13	0.731259
2022-09-15	12:25:13	0.731565
2022-09-15	12:25:13	0.73187
2022-09-15	12:25:13	0.733142
2022-09-15	12:25:14	0.73874
2022-09-15	12:25:14	0.738588
2022-09-15	12:25:14	0.733041
2022-09-15	12:25:14	0.730598
2022-09-15	12:25:15	0.732837
2022-09-15	12:25:15	0.735585
2022-09-15	12:25:15	0.728613
2022-09-15	12:25:15	0.695687
2022-09-15	12:25:16	0.732735
2022-09-15	12:25:16	0.719249
2022-09-15	12:25:16	0.538588
2022-09-15	12:25:17	0.718333
2022-09-15	12:25:17	0.731768
2022-09-15	12:25:17	0.737722
2022-09-15	12:25:17	0.735382
2022-09-15	12:25:18	0.721743
2022-09-15	12:25:18	0.731565
2022-09-15	12:25:18	0.715992
2022-09-15	12:25:18	0.691005
2022-09-15	12:25:19	0.740929
2022-09-15	12:25:19	0.733346
2022-09-15	12:25:19	0.734211
2022-09-15	12:25:19	0.732328
2022-09-15	12:25:20	0.728562
2022-09-15	12:25:20	0.734211
2022-09-15	12:25:20	0.734008
2022-09-15	12:25:21	0.735789
2022-09-15	12:25:21	0.740064
2022-09-15	12:25:21	0.731158
2022-09-15	12:25:21	0.733855
2022-09-15	12:25:22	0.737468
2022-09-15	12:25:22	0.73701
2022-09-15	12:25:22	0.733906
2022-09-15	12:25:22	0.729733
2022-09-15	12:25:23	0.735483
2022-09-15	12:25:23	0.732786
2022-09-15	12:25:23	0.737519
2022-09-15	12:25:23	0.731412
2022-09-15	12:25:24	0.740929
2022-09-15	12:25:24	0.727596
2022-09-15	12:25:24	0.73355
2022-09-15	12:25:25	0.736196
2022-09-15	12:25:25	0.734313
2022-09-15	12:25:25	0.734211
2022-09-15	12:25:25	0.733041
2022-09-15	12:25:26	0.736247
2022-09-15	12:25:26	0.727901
2022-09-15	12:25:26	0.736043
2022-09-15	12:25:26	0.731717
2022-09-15	12:25:27	0.729326
2022-09-15	12:25:27	0.737214
2022-09-15	12:25:27	0.730242
2022-09-15	12:25:27	0.730089
2022-09-15	12:25:28	0.728664
2022-09-15	12:25:28	0.732125
2022-09-15	12:25:28	0.730547
2022-09-15	12:25:29	0.73472
2022-09-15	12:25:29	0.733295
2022-09-15	12:25:29	0.73299
2022-09-15	12:25:29	0.734262
2022-09-15	12:25:30	0.726883
2022-09-15	12:25:30	0.733906
2022-09-15	12:25:30	0.735636
2022-09-15	12:25:30	0.732023
2022-09-15	12:25:31	0.735687
2022-09-15	12:25:31	0.733651
2022-09-15	12:25:31	0.728257
2022-09-15	12:25:31	0.730089
2022-09-15	12:25:32	0.730293
2022-09-15	12:25:32	1.36373
2022-09-15	12:25:32	0.728613
2022-09-15	12:25:33	0.728562
2022-09-15	12:25:33	0.724847
2022-09-15	12:25:33	0.724746
2022-09-15	12:25:33	0.73131
2022-09-15	12:25:34	0.733397
2022-09-15	12:25:34	0.72958
2022-09-15	12:25:34	0.725763
2022-09-15	12:25:34	0.735026
2022-09-15	12:25:35	0.726985
2022-09-15	12:25:35	0.733804
2022-09-15	12:25:35	0.734313
2022-09-15	12:25:35	0.728562
2022-09-15	12:25:36	0.73584
2022-09-15	12:25:36	0.728054
2022-09-15	12:25:36	0.73243
2022-09-15	12:25:37	0.725254
2022-09-15	12:25:37	0.729631
2022-09-15	12:25:37	0.72958
2022-09-15	12:25:37	0.731209
2022-09-15	12:25:38	2.19212
2022-09-15	12:25:38	0.736298
2022-09-15	12:25:38	0.729071
2022-09-15	12:25:38	0.946221
2022-09-15	12:25:39	0.901438
2022-09-15	12:25:39	0.731667
2022-09-15	12:25:39	0.740216
2022-09-15	12:25:39	1.51172
2022-09-15	12:25:40	0.730801
2022-09-15	12:25:40	0.730445
2022-09-15	12:25:40	0.896348
2022-09-15	12:25:41	0.736501
2022-09-15	12:25:41	0.727748
2022-09-15	12:25:41	0.73416
2022-09-15	12:25:41	0.862099
2022-09-15	12:25:42	2.32836
2022-09-15	12:25:42	2.43085
2022-09-15	12:25:42	2.73828
2022-09-15	12:25:42	2.02312
2022-09-15	12:25:43	3.51284
2022-09-15	12:25:43	1.74144
2022-09-15	12:25:43	1.9764
2022-09-15	12:25:43	0.866679
2022-09-15	12:25:44	0.728919
2022-09-15	12:25:44	0.73757
2022-09-15	12:25:44	0.738486
2022-09-15	12:25:45	0.732583
2022-09-15	12:25:45	0.735891
2022-09-15	12:25:45	4.19507
2022-09-15	12:25:45	0.800013
2022-09-15	12:25:46	1.40775
2022-09-15	12:25:46	1.09996
2022-09-15	12:25:46	1.85197
2022-09-15	12:25:46	1.28922
2022-09-15	12:25:47	1.18581
2022-09-15	12:25:47	0.763931
2022-09-15	12:25:47	0.731717
2022-09-15	12:25:47	0.72897
2022-09-15	12:25:48	0.813041
2022-09-15	12:25:48	0.442252
2022-09-15	12:25:48	0.711514
2022-09-15	12:25:49	0.743982
2022-09-15	12:25:49	0.365407
2022-09-15	12:25:49	0.962201
2022-09-15	12:25:49	0.307443
2022-09-15	12:25:50	0.0234735
2022-09-15	12:25:50	0.664033
2022-09-15	12:25:50	0.73813
2022-09-15	12:25:50	0.732532
2022-09-15	12:25:51	0.729173
2022-09-15	12:25:51	0.712532
2022-09-15	12:25:51	0.608359
2022-09-15	12:25:51	0.189377
2022-09-15	12:25:52	-0.0198344
2022-09-15	12:25:52	-0.107417
2022-09-15	12:25:52	0.0074939
2022-09-15	12:25:53	-0.113269
2022-09-15	12:25:53	-0.0533712
2022-09-15	12:25:53	0.0684099
2022-09-15	12:25:53	0.320166
2022-09-15	12:25:54	0.364491
2022-09-15	12:25:54	0.283779
2022-09-15	12:25:54	0.271718
2022-09-15	12:25:54	0.330038
2022-09-15	12:25:55	0.663779
2022-09-15	12:25:55	0.443321
2022-09-15	12:25:55	0.720165
2022-09-15	12:25:55	0.470344
2022-09-15	12:25:56	0.461285
2022-09-15	12:25:56	0.475992
2022-09-15	12:25:56	0.44388
2022-09-15	12:25:57	0.452227
2022-09-15	12:25:57	0.431769
2022-09-15	12:25:57	0.442048
2022-09-15	12:25:57	0.437265
2022-09-15	12:25:58	0.451056
2022-09-15	12:25:58	0.454669
2022-09-15	12:25:58	0.456654
2022-09-15	12:25:58	0.462965
2022-09-15	12:25:59	0.465458
2022-09-15	12:25:59	0.45645
2022-09-15	12:25:59	0.459657
2022-09-15	12:25:59	0.462099
2022-09-15	12:26:00	0.457417
2022-09-15	12:26:00	0.453346
2022-09-15	12:26:00	0.431056
2022-09-15	12:26:01	0.405814
2022-09-15	12:26:01	0.394313
2022-09-15	12:26:01	0.394059
2022-09-15	12:26:01	0.392074
2022-09-15	12:26:02	0.392532
2022-09-15	12:26:02	0.394262
2022-09-15	12:26:02	0.396298
2022-09-15	12:26:02	0.399962
2022-09-15	12:26:03	0.412023
2022-09-15	12:26:03	0.405051
2022-09-15	12:26:03	0.410598
2022-09-15	12:26:04	0.418486
2022-09-15	12:26:04	0.420776
2022-09-15	12:26:04	0.423982
2022-09-15	12:26:04	0.424491
2022-09-15	12:26:05	0.432685
2022-09-15	12:26:05	0.428868
2022-09-15	12:26:05	0.426374
2022-09-15	12:26:05	0.447494
2022-09-15	12:26:06	0.478486
2022-09-15	12:26:06	0.434211
2022-09-15	12:26:06	0.426171
2022-09-15	12:26:06	0.363524
2022-09-15	12:26:07	0.380267
2022-09-15	12:26:07	0.378181
2022-09-15	12:26:07	0.404542
2022-09-15	12:26:07	0.346069
2022-09-15	12:26:08	0.314466
2022-09-15	12:26:08	0.310344
2022-09-15	12:26:08	0.322405
2022-09-15	12:26:09	0.342863
2022-09-15	12:26:09	0.332074
2022-09-15	12:26:09	0.317824
2022-09-15	12:26:09	0.31299
2022-09-15	12:26:10	0.291107
2022-09-15	12:26:10	0.281489
2022-09-15	12:26:10	0.288715
2022-09-15	12:26:10	0.272939
2022-09-15	12:26:11	0.280064
2022-09-15	12:26:11	0.27757
2022-09-15	12:26:11	0.28215
2022-09-15	12:26:11	0.286628
2022-09-15	12:26:12	0.285611
2022-09-15	12:26:12	0.290802
2022-09-15	12:26:12	0.300064
2022-09-15	12:26:13	0.328664
2022-09-15	12:26:13	0.416349
2022-09-15	12:26:13	0.434313
2022-09-15	12:26:13	0.383422
2022-09-15	12:26:14	0.184237
2022-09-15	12:26:14	-0.002786
2022-09-15	12:26:14	-0.192964
2022-09-15	12:26:14	-0.0983076
2022-09-15	12:26:15	-0.182888
2022-09-15	12:26:15	-0.224109
2022-09-15	12:26:15	-0.938816
2022-09-15	12:26:15	-0.473218
2022-09-15	12:26:16	-0.544872
2022-09-15	12:26:16	-0.93047
2022-09-15	12:26:16	-1.33953
2022-09-15	12:26:17	-1.14472
2022-09-15	12:26:17	-1.23469
2022-09-15	12:26:17	-1.06452
2022-09-15	12:26:17	-1.29647
2022-09-15	12:26:18	-1.26009
2022-09-15	12:26:18	-0.749961
2022-09-15	12:26:18	-0.700852
2022-09-15	12:26:18	-0.591946
2022-09-15	12:26:19	-0.633015
2022-09-15	12:26:19	-0.503193
2022-09-15	12:26:19	-0.357798
2022-09-15	12:26:19	-0.33276
2022-09-15	12:26:20	-0.0280786
2022-09-15	12:26:20	-0.0772898
2022-09-15	12:26:20	0.346985
2022-09-15	12:26:21	0.21925
2022-09-15	12:26:21	0.606832
2022-09-15	12:26:21	0.576196
2022-09-15	12:26:21	0.494313
2022-09-15	12:26:22	0.510343
2022-09-15	12:26:22	0.516399
2022-09-15	12:26:22	0.796501
2022-09-15	12:26:22	5.58088
2022-09-15	12:26:23	1.24184
2022-09-15	12:26:23	1.4594
2022-09-15	12:26:23	0.885254
2022-09-15	12:26:23	0.308104
2022-09-15	12:26:24	0.19014
2022-09-15	12:26:24	0.379351
2022-09-15	12:26:24	0.39243
2022-09-15	12:26:25	1.36184
2022-09-15	12:26:25	4.30663
2022-09-15	12:26:25	4.36678
2022-09-15	12:26:25	0.957621
2022-09-15	12:26:26	0.22444
2022-09-15	12:26:26	0.298181
2022-09-15	12:26:26	0.326527
2022-09-15	12:26:26	0.197061
2022-09-15	12:26:27	0.249631
2022-09-15	12:26:27	0.00983486
2022-09-15	12:26:27	0.155535
2022-09-15	12:26:28	-0.0853814
2022-09-15	12:26:28	0.213804
2022-09-15	12:26:28	0.220267
2022-09-15	12:26:28	0.601692
2022-09-15	12:26:29	0.594466
2022-09-15	12:26:29	0.705407
2022-09-15	12:26:29	6.41848
2022-09-15	12:26:29	8.37273
2022-09-15	12:26:30	3.32739
2022-09-15	12:26:30	1.50866
2022-09-15	12:26:30	0.512176
2022-09-15	12:26:30	0.949428
2022-09-15	12:26:31	1.41788
2022-09-15	12:26:31	2.31518
2022-09-15	12:26:31	5.65441
2022-09-15	12:26:31	2.75197
2022-09-15	12:26:32	1.61798
2022-09-15	12:26:32	0.667697
2022-09-15	12:26:32	0.748766
2022-09-15	12:26:33	0.648104
2022-09-15	12:26:33	0.491361
2022-09-15	12:26:33	0.584847
2022-09-15	12:26:33	0.459504
2022-09-15	12:26:34	0.61701
2022-09-15	12:26:34	0.408512
2022-09-15	12:26:34	0.621743
2022-09-15	12:26:34	0.38785
2022-09-15	12:26:35	0.665051
2022-09-15	12:26:35	0.352226
2022-09-15	12:26:35	0.554975
2022-09-15	12:26:35	0.377214
2022-09-15	12:26:36	0.580318
2022-09-15	12:26:36	0.473499
2022-09-15	12:26:36	0.554211
2022-09-15	12:26:37	0.490293
2022-09-15	12:26:37	0.534924
2022-09-15	12:26:37	0.48612
2022-09-15	12:26:37	0.51813
2022-09-15	12:26:38	0.540063
2022-09-15	12:26:38	0.476501
2022-09-15	12:26:38	0.51472
2022-09-15	12:26:38	0.547952
2022-09-15	12:26:39	0.55355
2022-09-15	12:26:39	0.488359
2022-09-15	12:26:39	0.505509
2022-09-15	12:26:39	0.51472
2022-09-15	12:26:40	0.547086
2022-09-15	12:26:40	0.524644
2022-09-15	12:26:40	0.503677
2022-09-15	12:26:41	0.503219
2022-09-15	12:26:41	0.555382
2022-09-15	12:26:41	0.482405
2022-09-15	12:26:41	0.531209
2022-09-15	12:26:42	0.514517
2022-09-15	12:26:42	0.561336
2022-09-15	12:26:42	0.517723
2022-09-15	12:26:42	0.495993
2022-09-15	12:26:43	0.505713
2022-09-15	12:26:43	0.53528
2022-09-15	12:26:43	0.504491
2022-09-15	12:26:43	0.519046
2022-09-15	12:26:44	0.500063
2022-09-15	12:26:44	0.608206
2022-09-15	12:26:44	0.388104
2022-09-15	12:26:45	0.550954
2022-09-15	12:26:45	0.403677
2022-09-15	12:26:45	0.592837
2022-09-15	12:26:45	0.422252
2022-09-15	12:26:46	0.511667
2022-09-15	12:26:46	0.459453
2022-09-15	12:26:46	0.629885
2022-09-15	12:26:46	0.544186
2022-09-15	12:26:47	0.346272
2022-09-15	12:26:47	0.124797
2022-09-15	12:26:47	-0.186552
2022-09-15	12:26:47	0.0119723
2022-09-15	12:26:48	-0.0994781
2022-09-15	12:26:48	0.0794022
2022-09-15	12:26:48	-0.152455
2022-09-15	12:26:49	-0.0899106
2022-09-15	12:26:49	-0.222328
2022-09-15	12:26:49	-0.224364
2022-09-15	12:26:49	-0.417493
2022-09-15	12:26:50	-0.357493
2022-09-15	12:26:50	-0.350877
2022-09-15	12:26:50	-0.288638
2022-09-15	12:26:50	-0.302023
2022-09-15	12:26:51	-0.167773
2022-09-15	12:26:51	-0.204007
2022-09-15	12:26:51	-0.225839
2022-09-15	12:26:51	-0.300292
2022-09-15	12:26:52	-0.149656
2022-09-15	12:26:52	-0.211081
2022-09-15	12:26:52	-0.156628
2022-09-15	12:26:53	-0.217392
2022-09-15	12:26:53	-0.111539
2022-09-15	12:26:53	-0.129503
2022-09-15	12:26:53	-0.0426333
2022-09-15	12:26:54	-0.147163
2022-09-15	12:26:54	-0.0571371
2022-09-15	12:26:54	-0.135356
2022-09-15	12:26:54	0.108766
2022-09-15	12:26:55	-0.0723534
2022-09-15	12:26:55	0.182354
2022-09-15	12:26:55	-0.055356
2022-09-15	12:26:55	0.0385371
2022-09-15	12:26:56	0.033957
2022-09-15	12:26:56	0.0138552
2022-09-15	12:26:56	0.0937534
2022-09-15	12:26:57	0.0810307
2022-09-15	12:26:57	0.11528
2022-09-15	12:26:57	0.0428628
2022-09-15	12:26:57	0.16841
2022-09-15	12:26:58	0.0706491
2022-09-15	12:26:58	0.0438806
2022-09-15	12:26:58	-0.145178
2022-09-15	12:26:58	-0.136832
2022-09-15	12:26:59	-0.157493
2022-09-15	12:26:59	0.663422
2022-09-15	12:26:59	1.642
2022-09-15	12:26:59	0.548359
2022-09-15	12:27:00	0.365814
2022-09-15	12:27:00	0.534008
2022-09-15	12:27:00	0.109529
2022-09-15	12:27:01	0.4707
2022-09-15	12:27:01	0.751107
2022-09-15	12:27:01	2.02032
2022-09-15	12:27:01	0.0750257
2022-09-15	12:27:02	-0.0151524
2022-09-15	12:27:02	-0.108689
2022-09-15	12:27:02	-0.123804
2022-09-15	12:27:02	-0.255712
2022-09-15	12:27:03	-0.0623789
2022-09-15	12:27:03	-0.116476
2022-09-15	12:27:03	-0.121208
2022-09-15	12:27:03	-0.240649
2022-09-15	12:27:04	-0.102328
2022-09-15	12:27:04	-0.147519
2022-09-15	12:27:04	-0.0879259
2022-09-15	12:27:05	-0.144364
2022-09-15	12:27:05	0.0208781
2022-09-15	12:27:05	0.0597076
2022-09-15	12:27:05	0.102252
2022-09-15	12:27:06	0.193295
2022-09-15	12:27:06	0.126222
2022-09-15	12:27:06	0.293143
2022-09-15	12:27:06	0.295942
2022-09-15	12:27:07	0.696654
2022-09-15	12:27:07	1.18093
2022-09-15	12:27:07	1.71431
2022-09-15	12:27:07	0.819046
2022-09-15	12:27:08	0.729478
2022-09-15	12:27:08	0.294262
2022-09-15	12:27:08	0.485255
2022-09-15	12:27:09	0.473652
2022-09-15	12:27:09	0.503371
2022-09-15	12:27:09	1.10439
2022-09-15	12:27:09	2.03813
2022-09-15	12:27:10	1.63859
2022-09-15	12:27:10	1.25752
2022-09-15	12:27:10	1.78826
2022-09-15	12:27:10	1.7448
2022-09-15	12:27:11	1.52902
2022-09-15	12:27:11	3.23569
2022-09-15	12:27:11	2.62708
2022-09-15	12:27:11	1.70174
2022-09-15	12:27:12	0.656552
2022-09-15	12:27:12	0.934924
2022-09-15	12:27:12	1.42108
2022-09-15	12:27:13	2.20683
2022-09-15	12:27:13	3.49681
2022-09-15	12:27:13	3.16719
2022-09-15	12:27:13	4.98362
2022-09-15	12:27:14	3.69075
2022-09-15	12:27:14	4.74658
2022-09-15	12:27:14	3.58826
2022-09-15	12:27:14	5.50993
2022-09-15	12:27:15	1.76378
2022-09-15	12:27:15	3.13955
2022-09-15	12:27:15	3.03838
2022-09-15	12:27:15	3.25355
2022-09-15	12:27:16	2.54887
2022-09-15	12:27:16	3.39645
2022-09-15	12:27:16	3.64897
2022-09-15	12:27:17	2.96118
2022-09-15	12:27:17	1.85141
2022-09-15	12:27:17	2.76332
2022-09-15	12:27:17	4.64836
2022-09-15	12:27:18	6.2854
2022-09-15	12:27:18	6.77166
2022-09-15	12:27:18	6.35752
2022-09-15	12:27:18	6.83136
2022-09-15	12:27:19	6.35991
2022-09-15	12:27:19	2.00775
2022-09-15	12:27:19	1.90653
2022-09-15	12:27:19	0.759962
2022-09-15	12:27:20	1.19752
2022-09-15	12:27:20	2.19966
2022-09-15	12:27:20	2.88602
2022-09-15	12:27:21	1.08561
2022-09-15	12:27:21	1.0595
2022-09-15	12:27:21	1.86373
2022-09-15	12:27:21	0.972735
2022-09-15	12:27:22	0.737265
2022-09-15	12:27:22	0.73299
2022-09-15	12:27:22	1.67523
2022-09-15	12:27:22	0.840929
2022-09-15	12:27:23	3.7764
2022-09-15	12:27:23	3.15207
2022-09-15	12:27:23	5.54342
2022-09-15	12:27:23	9.60082
2022-09-15	12:27:24	8.51945
2022-09-15	12:27:24	2.85212
2022-09-15	12:27:24	5.81405
2022-09-15	12:27:25	9.49029
2022-09-15	12:27:25	7.68143
2022-09-15	12:27:25	3.55553
2022-09-15	12:27:25	4.34408
2022-09-15	12:27:26	3.42077
2022-09-15	12:27:26	5.02316
2022-09-15	12:27:26	2.47462
2022-09-15	12:27:26	2.54902
2022-09-15	12:27:27	1.69849
2022-09-15	12:27:27	4.09823
2022-09-15	12:27:27	6.73945
2022-09-15	12:27:27	3.90612
2022-09-15	12:27:28	2.55492
2022-09-15	12:27:28	2.00525
2022-09-15	12:27:28	1.6623
2022-09-15	12:27:29	1.00296
2022-09-15	12:27:29	1.50088
2022-09-15	12:27:29	0.830038
2022-09-15	12:27:29	0.232583
2022-09-15	12:27:30	0.376807
2022-09-15	12:27:30	0.816094
2022-09-15	12:27:30	0.926578
2022-09-15	12:27:30	1.46754
2022-09-15	12:27:31	3.12642
2022-09-15	12:27:31	4.93385
2022-09-15	12:27:31	7.6882
2022-09-15	12:27:31	11.667
2022-09-15	12:27:32	8.58438
2022-09-15	12:27:32	8.34892
2022-09-15	12:27:32	10.3789
2022-09-15	12:27:33	5.33258
2022-09-15	12:27:33	2.34775
2022-09-15	12:27:33	0.845356
2022-09-15	12:27:33	0.356858
2022-09-15	12:27:34	0.294567
2022-09-15	12:27:34	0.583015
2022-09-15	12:27:34	0.91126
2022-09-15	12:27:34	0.510547
2022-09-15	12:27:35	0.552227
2022-09-15	12:27:35	0.564287
2022-09-15	12:27:35	0.621387
2022-09-15	12:27:35	1.0992
2022-09-15	12:27:36	0.684389
2022-09-15	12:27:36	0.599606
2022-09-15	12:27:36	0.34612
2022-09-15	12:27:37	0.51131
2022-09-15	12:27:37	0.331769
2022-09-15	12:27:37	0.443677
2022-09-15	12:27:37	0.32327
2022-09-15	12:27:38	0.468715
2022-09-15	12:27:38	0.308715
2022-09-15	12:27:38	0.480776
2022-09-15	12:27:38	0.336603
2022-09-15	12:27:39	0.570038
2022-09-15	12:27:39	0.283473
2022-09-15	12:27:39	0.512735
2022-09-15	12:27:39	0.333753
2022-09-15	12:27:40	0.616756
2022-09-15	12:27:40	0.731056
2022-09-15	12:27:40	0.730903
2022-09-15	12:27:41	0.723473
2022-09-15	12:27:41	0.756858
2022-09-15	12:27:41	0.839097
2022-09-15	12:27:41	1.23309
2022-09-15	12:27:42	1.17467
2022-09-15	12:27:42	1.5452
2022-09-15	12:27:42	1.81462
2022-09-15	12:27:42	1.58653
2022-09-15	12:27:43	1.46541
2022-09-15	12:27:43	1.13635
2022-09-15	12:27:43	1.12337
2022-09-15	12:27:43	0.904898
2022-09-15	12:27:44	0.795076
2022-09-15	12:27:44	0.538639
2022-09-15	12:27:44	0.767596
2022-09-15	12:27:44	0.484847
2022-09-15	12:27:45	0.700776
2022-09-15	12:27:45	0.740929
2022-09-15	12:27:45	0.737214
2022-09-15	12:27:46	0.726476
2022-09-15	12:27:46	0.731616
2022-09-15	12:27:46	0.366323
2022-09-15	12:27:46	0.23187
2022-09-15	12:27:47	0.28841
2022-09-15	12:27:47	0.710751
2022-09-15	12:27:47	0.700929
2022-09-15	12:27:47	0.735127
