# Supplementary material for: Comparing efficacy in reducing pulling and welfare impacts of four types of leash walking equipment
Source: PeerJ journal article supplement (doi:10.7717/peerj.18131), 2024-10-24
Supplement: Shelter_2_Tension_files.zip [file Tyr_star_2022915111828 copy.xlsx]

## Sheet: Averaged Newtons
Date	Time	Averaged Newtons	Impulse	Total steps
2022-09-15	11:18:37	1.19728	1.19728	0		Impulse newtons	3770.58
2022-09-15	11:18:38	1.38568	2.58296	0		Total steps	99
2022-09-15	11:18:39	1.31731	3.90027	0		# > 5 sec	6
2022-09-15	11:18:40	1.34816	5.24842	0
2022-09-15	11:18:41	3.42529	8.67371	0
2022-09-15	11:18:42	4.36828	13.042	0
2022-09-15	11:18:43	2.59801	15.64	0
2022-09-15	11:18:44	6.53885	22.1789	0
2022-09-15	11:18:45	9.32849	31.5073	0
2022-09-15	11:18:46	6.03616	37.5435	0
2022-09-15	11:18:47	23.5575	61.101	1
2022-09-15	11:18:48	15.4912	76.5922	2
2022-09-15	11:18:49	23.3066	99.8988	3
2022-09-15	11:18:50	33.3077	133.207	4
2022-09-15	11:18:51	14.6892	147.896	5
2022-09-15	11:18:52	17.1199	165.016	6
2022-09-15	11:18:53	3.19609	168.212	6
2022-09-15	11:18:54	4.1462	172.358	6
2022-09-15	11:18:55	22.2031	194.561	7
2022-09-15	11:18:56	46.7166	241.278	8
2022-09-15	11:18:57	56.5963	297.874	9
2022-09-15	11:18:58	60.9394	358.813	10
2022-09-15	11:18:59	7.04716	365.86	10
2022-09-15	11:19:00	1.61918	367.48	10
2022-09-15	11:19:01	1.6318	369.111	10
2022-09-15	11:19:02	6.6393	375.751	10
2022-09-15	11:19:03	4.01962	379.77	10
2022-09-15	11:19:04	0.553535	380.324	10
2022-09-15	11:19:05	2.56454	382.888	10
2022-09-15	11:19:06	4.12811	387.017	10
2022-09-15	11:19:07	0.750762	387.767	10
2022-09-15	11:19:08	8.42685	396.194	10
2022-09-15	11:19:09	11.5263	407.72	10
2022-09-15	11:19:10	20.7433	428.464	11
2022-09-15	11:19:11	25.1188	453.583	12
2022-09-15	11:19:12	18.4874	472.07	13
2022-09-15	11:19:13	5.44867	477.519	13
2022-09-15	11:19:14	2.93287	480.451	13
2022-09-15	11:19:15	3.7671	484.219	13
2022-09-15	11:19:16	1.70209	485.921	13
2022-09-15	11:19:17	2.04834	487.969	13
2022-09-15	11:19:18	9.11773	497.087	13
2022-09-15	11:19:19	4.89614	501.983	13
2022-09-15	11:19:20	1.63446	503.617	13
2022-09-15	11:19:21	1.16806	504.785	13
2022-09-15	11:19:22	-1.59456	504.785	13
2022-09-15	11:19:23	-2.18997	504.785	13
2022-09-15	11:19:24	6.42176	511.207	13
2022-09-15	11:19:25	8.77723	519.984	13
2022-09-15	11:19:26	16.4283	536.413	14
2022-09-15	11:19:27	12.2161	548.629	14
2022-09-15	11:19:28	10.7493	559.378	14
2022-09-15	11:19:29	7.66416	567.042	14
2022-09-15	11:19:30	3.66847	570.711	14
2022-09-15	11:19:31	1.02818	571.739	14
2022-09-15	11:19:32	1.28438	573.023	14
2022-09-15	11:19:33	2.28837	575.312	14
2022-09-15	11:19:34	5.90055	581.212	14
2022-09-15	11:19:35	4.88775	586.1	14
2022-09-15	11:19:36	5.54825	591.648	14
2022-09-15	11:19:37	6.52469	598.173	14
2022-09-15	11:19:38	1.77068	599.943	14
2022-09-15	11:19:39	2.39133	602.335	14
2022-09-15	11:19:40	1.52112	603.856	14
2022-09-15	11:19:41	0.730331	604.586	14
2022-09-15	11:19:42	1.48268	606.069	14
2022-09-15	11:19:43	24.3072	630.376	15
2022-09-15	11:19:44	9.94705	640.323	15
2022-09-15	11:19:45	3.35539	643.679	15
2022-09-15	11:19:46	20.0659	663.744	16
2022-09-15	11:19:47	11.6704	675.415	16
2022-09-15	11:19:48	11.9605	687.375	16
2022-09-15	11:19:49	15.5473	702.923	17
2022-09-15	11:19:50	11.6136	714.536	17
2022-09-15	11:19:51	5.88306	720.419	17
2022-09-15	11:19:52	1.7484	722.168	17
2022-09-15	11:19:53	0.876455	723.044	17
2022-09-15	11:19:54	0.89213	723.936	17
2022-09-15	11:19:55	1.2567	725.193	17
2022-09-15	11:19:56	1.53222	726.725	17
2022-09-15	11:19:57	1.56332	728.289	17
2022-09-15	11:19:58	1.00283	729.291	17
2022-09-15	11:19:59	0.97685	730.268	17
2022-09-15	11:20:00	1.14867	731.417	17
2022-09-15	11:20:01	0.928407	732.345	17
2022-09-15	11:20:02	11.5452	743.89	17
2022-09-15	11:20:03	21.0863	764.977	18
2022-09-15	11:20:04	3.9645	768.941	18
2022-09-15	11:20:05	62.1517	831.093	19
2022-09-15	11:20:06	23.7342	854.827	20
2022-09-15	11:20:07	23.6705	878.498	21
2022-09-15	11:20:08	34.318	912.816	22
2022-09-15	11:20:09	3.40565	916.221	22
2022-09-15	11:20:10	4.79998	921.021	22
2022-09-15	11:20:11	29.7458	950.767	23
2022-09-15	11:20:12	12.0196	962.787	23
2022-09-15	11:20:13	10.1908	972.977	23
2022-09-15	11:20:14	13.9018	986.879	24
2022-09-15	11:20:15	11.1937	998.073	24
2022-09-15	11:20:16	3.91515	1001.99	24
2022-09-15	11:20:17	3.68969	1005.68	24
2022-09-15	11:20:18	3.35075	1009.03	24
2022-09-15	11:20:19	1.61228	1010.64	24
2022-09-15	11:20:20	7.62656	1018.27	24
2022-09-15	11:20:21	8.52526	1026.79	24
2022-09-15	11:20:22	3.72557	1030.52	24
2022-09-15	11:20:23	-1.14885	1030.52	24
2022-09-15	11:20:24	0.0762876	1030.59	24
2022-09-15	11:20:25	0.613185	1031.21	24
2022-09-15	11:20:26	0.90543	1032.11	24
2022-09-15	11:20:27	1.60058	1033.71	24
2022-09-15	11:20:28	2.90248	1036.62	24
2022-09-15	11:20:29	1.06349	1037.68	24
2022-09-15	11:20:30	1.49394	1039.17	24
2022-09-15	11:20:31	3.67497	1042.85	24
2022-09-15	11:20:32	30.0449	1072.89	25
2022-09-15	11:20:33	63.8492	1136.74	26
2022-09-15	11:20:34	24.3335	1161.08	27
2022-09-15	11:20:35	12.3771	1173.45	27
2022-09-15	11:20:36	7.91145	1181.36	27
2022-09-15	11:20:37	11.7821	1193.15	27
2022-09-15	11:20:38	30.1419	1223.29	28
2022-09-15	11:20:39	37.667	1260.96	29
2022-09-15	11:20:40	34.4876	1295.44	30
2022-09-15	11:20:41	26.0871	1321.53	31
2022-09-15	11:20:42	18.3267	1339.86	32
2022-09-15	11:20:43	17.0994	1356.96	33
2022-09-15	11:20:44	2.98918	1359.95	33
2022-09-15	11:20:45	1.99264	1361.94	33
2022-09-15	11:20:46	0.285851	1362.22	33
2022-09-15	11:20:47	-0.637706	1362.22	33
2022-09-15	11:20:48	3.68498	1365.91	33
2022-09-15	11:20:49	18.7327	1384.64	34
2022-09-15	11:20:50	12.8186	1397.46	34
2022-09-15	11:20:51	7.32779	1404.79	34
2022-09-15	11:20:52	4.53377	1409.32	34
2022-09-15	11:20:53	1.13639	1410.46	34
2022-09-15	11:20:54	-0.855231	1410.46	34
2022-09-15	11:20:55	1.45706	1411.92	34
2022-09-15	11:20:56	3.71617	1415.63	34
2022-09-15	11:20:57	5.60615	1421.24	34
2022-09-15	11:20:58	3.48361	1424.72	34
2022-09-15	11:20:59	2.08777	1426.81	34
2022-09-15	11:21:00	3.21187	1430.02	34
2022-09-15	11:21:01	2.69535	1432.72	34
2022-09-15	11:21:02	21.3765	1454.09	35
2022-09-15	11:21:03	35.262	1489.35	36
2022-09-15	11:21:04	11.5293	1500.88	36
2022-09-15	11:21:05	7.21349	1508.1	36
2022-09-15	11:21:06	7.78799	1515.89	36
2022-09-15	11:21:07	12.6398	1528.53	36
2022-09-15	11:21:08	4.99697	1533.52	36
2022-09-15	11:21:09	4.65939	1538.18	36
2022-09-15	11:21:10	13.4041	1551.59	37
2022-09-15	11:21:11	14.6914	1566.28	38
2022-09-15	11:21:12	13.4197	1579.7	39
2022-09-15	11:21:13	13.6221	1593.32	40
2022-09-15	11:21:14	10.8709	1604.19	40
2022-09-15	11:21:15	9.81891	1614.01	40
2022-09-15	11:21:16	5.5229	1619.53	40
2022-09-15	11:21:17	0.364006	1619.9	40
2022-09-15	11:21:18	3.1602	1623.06	40
2022-09-15	11:21:19	3.44611	1626.5	40
2022-09-15	11:21:20	0.47108	1626.97	40
2022-09-15	11:21:21	1.81612	1628.79	40
2022-09-15	11:21:22	1.22661	1630.02	40
2022-09-15	11:21:23	1.55613	1631.57	40
2022-09-15	11:21:24	1.05676	1632.63	40
2022-09-15	11:21:25	-0.124389	1632.63	40
2022-09-15	11:21:26	-0.847175	1632.63	40
2022-09-15	11:21:27	-0.635593	1632.63	40
2022-09-15	11:21:28	0.907864	1633.54	40
2022-09-15	11:21:29	1.17334	1634.71	40
2022-09-15	11:21:30	1.66042	1636.37	40
2022-09-15	11:21:31	1.03203	1637.4	40
2022-09-15	11:21:32	0.788452	1638.19	40
2022-09-15	11:21:33	1.07504	1639.27	40
2022-09-15	11:21:34	0.783228	1640.05	40
2022-09-15	11:21:35	0.430502	1640.48	40
2022-09-15	11:21:36	2.50078	1642.98	40
2022-09-15	11:21:37	0.489473	1643.47	40
2022-09-15	11:21:38	-0.598015	1643.47	40
2022-09-15	11:21:39	-0.882226	1643.47	40
2022-09-15	11:21:40	0.243803	1643.71	40
2022-09-15	11:21:41	-0.866039	1643.71	40
2022-09-15	11:21:42	-2.08324	1643.71	40
2022-09-15	11:21:43	-1.42987	1643.71	40
2022-09-15	11:21:44	-0.849006	1643.71	40
2022-09-15	11:21:45	-0.439725	1643.71	40
2022-09-15	11:21:46	0.535351	1644.25	40
2022-09-15	11:21:47	5.45329	1649.7	40
2022-09-15	11:21:48	4.47112	1654.17	40
2022-09-15	11:21:49	7.15483	1661.33	40
2022-09-15	11:21:50	0.287266	1661.62	40
2022-09-15	11:21:51	-0.745384	1661.62	40
2022-09-15	11:21:52	14.3912	1676.01	41
2022-09-15	11:21:53	14.255	1690.26	42
2022-09-15	11:21:54	3.63785	1693.9	42
2022-09-15	11:21:55	4.01566	1697.92	42
2022-09-15	11:21:56	37.772	1735.69	43
2022-09-15	11:21:57	29.1299	1764.82	44
2022-09-15	11:21:58	45.8309	1810.65	45
2022-09-15	11:21:59	37.8045	1848.45	46
2022-09-15	11:22:00	36.1501	1884.6	47
2022-09-15	11:22:01	47.4992	1932.1	48
2022-09-15	11:22:02	45.7466	1977.85	49
2022-09-15	11:22:03	23.8781	2001.73	50
2022-09-15	11:22:04	22.0464	2023.77	51
2022-09-15	11:22:05	14.0023	2037.78	52
2022-09-15	11:22:06	9.20557	2046.98	52
2022-09-15	11:22:07	14.4394	2061.42	53
2022-09-15	11:22:08	13.1899	2074.61	54
2022-09-15	11:22:09	18.7147	2093.32	55
2022-09-15	11:22:10	46.4933	2139.82	56
2022-09-15	11:22:11	32.2717	2172.09	57
2022-09-15	11:22:12	41.495	2213.58	58
2022-09-15	11:22:13	60.6847	2274.27	59
2022-09-15	11:22:14	28.2915	2302.56	60
2022-09-15	11:22:15	-0.0553458	2302.56	60
2022-09-15	11:22:16	0.0741376	2302.64	60
2022-09-15	11:22:17	0.0536322	2302.69	60
2022-09-15	11:22:18	1.46972	2304.16	60
2022-09-15	11:22:19	0.648235	2304.81	60
2022-09-15	11:22:20	0.984909	2305.79	60
2022-09-15	11:22:21	1.27958	2307.07	60
2022-09-15	11:22:22	0.845837	2307.92	60
2022-09-15	11:22:23	0.50662	2308.42	60
2022-09-15	11:22:24	-0.111204	2308.42	60
2022-09-15	11:22:25	-0.135765	2308.42	60
2022-09-15	11:22:26	0.412563	2308.84	60
2022-09-15	11:22:27	0.497509	2309.33	60
2022-09-15	11:22:28	0.829709	2310.16	60
2022-09-15	11:22:29	30.1746	2340.34	61
2022-09-15	11:22:30	17.1997	2357.54	62
2022-09-15	11:22:31	13.6343	2371.17	63
2022-09-15	11:22:32	13.3764	2384.55	64
2022-09-15	11:22:33	25.8284	2410.38	65
2022-09-15	11:22:34	13.895	2424.27	66
2022-09-15	11:22:35	11.6453	2435.92	66
2022-09-15	11:22:36	21.2757	2457.19	67
2022-09-15	11:22:37	25.5325	2482.73	68
2022-09-15	11:22:38	24.9078	2507.63	69
2022-09-15	11:22:39	23.9136	2531.55	70
2022-09-15	11:22:40	11.9521	2543.5	70
2022-09-15	11:22:41	4.03309	2547.53	70
2022-09-15	11:22:42	4.36845	2551.9	70
2022-09-15	11:22:43	2.18477	2554.09	70
2022-09-15	11:22:44	15.8893	2569.97	71
2022-09-15	11:22:45	16.773	2586.75	72
2022-09-15	11:22:46	25.4275	2612.18	73
2022-09-15	11:22:47	10.9036	2623.08	73
2022-09-15	11:22:48	1.72812	2624.81	73
2022-09-15	11:22:49	6.46832	2631.28	73
2022-09-15	11:22:50	20.1451	2651.42	74
2022-09-15	11:22:51	24.9898	2676.41	75
2022-09-15	11:22:52	15.9127	2692.32	76
2022-09-15	11:22:53	26.9435	2719.27	77
2022-09-15	11:22:54	27.1223	2746.39	78
2022-09-15	11:22:55	29.3238	2775.71	79
2022-09-15	11:22:56	38.6377	2814.35	80
2022-09-15	11:22:57	63.134	2877.48	81
2022-09-15	11:22:58	68.7008	2946.18	82
2022-09-15	11:22:59	33.4906	2979.68	83
2022-09-15	11:23:00	32.062	3011.74	84
2022-09-15	11:23:01	64.2501	3075.99	85
2022-09-15	11:23:02	57.3098	3133.3	86
2022-09-15	11:23:03	61.9565	3195.25	87
2022-09-15	11:23:04	47.1332	3242.39	88
2022-09-15	11:23:05	77.4945	3319.88	89
2022-09-15	11:23:06	30.5828	3350.46	90
2022-09-15	11:23:07	60.828	3411.29	91
2022-09-15	11:23:08	32.9877	3444.28	92
2022-09-15	11:23:09	5.17001	3449.45	92
2022-09-15	11:23:10	3.72624	3453.18	92
2022-09-15	11:23:11	1.9275	3455.1	92
2022-09-15	11:23:12	4.16834	3459.27	92
2022-09-15	11:23:13	4.97162	3464.24	92
2022-09-15	11:23:14	3.73253	3467.98	92
2022-09-15	11:23:15	-0.787092	3467.98	92
2022-09-15	11:23:16	-2.60011	3467.98	92
2022-09-15	11:23:17	11.0656	3479.04	92
2022-09-15	11:23:18	51.0866	3530.13	93
2022-09-15	11:23:19	62.5922	3592.72	94
2022-09-15	11:23:20	16.8284	3609.55	95
2022-09-15	11:23:21	40.9148	3650.46	96
2022-09-15	11:23:22	27.4715	3677.94	97
2022-09-15	11:23:23	4.37542	3682.31	97
2022-09-15	11:23:24	19.9687	3702.28	98
2022-09-15	11:23:25	6.58144	3708.86	98
2022-09-15	11:23:26	9.15661	3718.02	98
2022-09-15	11:23:27	10.7713	3728.79	98
2022-09-15	11:23:28	13.25	3742.04	99
2022-09-15	11:23:29	3.04294	3745.08	99
2022-09-15	11:23:30	3.46547	3748.55	99
2022-09-15	11:23:31	8.78497	3757.33	99
2022-09-15	11:23:32	5.48549	3762.82	99
2022-09-15	11:23:33	1.84702	3764.66	99
2022-09-15	11:23:34	1.43452	3766.1	99
2022-09-15	11:23:35	0.329711	3766.43	99
2022-09-15	11:23:36	1.15433	3767.58	99
2022-09-15	11:23:37	2.99999	3770.58	99

## Sheet: Tyr_star_2022915111828 (4)
Date	Time	Lbs	Newtons	Averaged Newtons	Total force x time		Total steps > 13.345	**GoPro Fitting: 1108
2022-09-15	11:18:37	0.274618	1.22156	1.19728	1.22156	FALSE	0
2022-09-15	11:18:37	0.285865	1.27158	1.19728	1.27158	FALSE	0
2022-09-15	11:18:37	0.248003	1.10317	1.19728	2.32472	FALSE	0
2022-09-15	11:18:37	0.268155	1.19281	1.19728	2.46439	FALSE	0
2022-09-15	11:18:38	0.326221	1.4511	1.38568	3.77582	FALSE	0
2022-09-15	11:18:38	0.296349	1.31822	1.38568	3.78261	FALSE	0
2022-09-15	11:18:38	0.311972	1.38771	1.38568	5.16353	FALSE	0
2022-09-15	11:18:39	0.292532	1.30124	1.31731	5.08385	FALSE	0
2022-09-15	11:18:39	0.304746	1.35557	1.31731	6.5191	FALSE	0
2022-09-15	11:18:39	0.305407	1.35851	1.31731	6.44236	FALSE	0
2022-09-15	11:18:39	0.281896	1.25393	1.31731	7.77303	FALSE	0
2022-09-15	11:18:40	0.30154	1.34131	1.34816	7.78367	FALSE	0
2022-09-15	11:18:40	0.330445	1.46989	1.34816	9.24292	FALSE	0
2022-09-15	11:18:40	0.261031	1.16112	1.34816	8.94479	FALSE	0
2022-09-15	11:18:40	0.3193	1.42031	1.34816	10.6632	FALSE	0
2022-09-15	11:18:41	0.390445	1.73678	3.42529	10.6816	FALSE	0
2022-09-15	11:18:41	0.461692	2.0537	3.42529	12.7169	FALSE	0
2022-09-15	11:18:41	1.12261	4.99359	3.42529	15.6752	FALSE	0
2022-09-15	11:18:41	1.10541	4.91708	3.42529	17.634	FALSE	0
2022-09-15	11:18:42	1.62312	7.21996	4.36828	22.8951	FALSE	0
2022-09-15	11:18:42	0.833651	3.70825	4.36828	21.3423	FALSE	0
2022-09-15	11:18:42	0.489326	2.17662	4.36828	25.0717	FALSE	0
2022-09-15	11:18:43	0.34098	1.51675	2.59801	22.859	FALSE	0
2022-09-15	11:18:43	0.672023	2.98929	2.59801	28.061	FALSE	0
2022-09-15	11:18:43	0.669326	2.9773	2.59801	25.8363	FALSE	0
2022-09-15	11:18:43	0.653906	2.9087	2.59801	30.9697	FALSE	0
2022-09-15	11:18:44	1.09182	4.85663	6.53885	30.6929	FALSE	0
2022-09-15	11:18:44	1.94413	8.64788	6.53885	39.6176	FALSE	0
2022-09-15	11:18:44	1.69447	7.53734	6.53885	38.2303	FALSE	0
2022-09-15	11:18:44	1.14958	5.11356	6.53885	44.7312	FALSE	0
2022-09-15	11:18:45	1.43757	6.3946	9.32849	44.6249	FALSE	0
2022-09-15	11:18:45	1.15457	5.13576	9.32849	49.8669	FALSE	0
2022-09-15	11:18:45	2.93523	13.0565	9.32849	57.6814	FALSE	0
2022-09-15	11:18:45	2.86118	12.7271	9.32849	62.594	FALSE	0
2022-09-15	11:18:46	1.18581	5.27472	6.03616	62.9561	FALSE	0
2022-09-15	11:18:46	1.07436	4.77897	6.03616	67.373	FALSE	0
2022-09-15	11:18:46	1.8108	8.0548	6.03616	71.0109	FALSE	0
2022-09-15	11:18:47	4.13151	18.3778	23.5575	85.7508	1	1
2022-09-15	11:18:47	5.27711	23.4736	23.5575	94.4845	1	2
2022-09-15	11:18:47	7.32113	32.5659	23.5575	118.317	1	3
2022-09-15	11:18:47	4.45411	19.8128	23.5575	114.297	1	4
2022-09-15	11:18:48	2.74658	12.2173	15.4912	130.534	FALSE	4
2022-09-15	11:18:48	4.9139	21.858	15.4912	136.155	1	5
2022-09-15	11:18:48	2.82296	12.5571	15.4912	143.091	FALSE	5
2022-09-15	11:18:48	3.44688	15.3324	15.4912	151.488	1	6
2022-09-15	11:18:49	2.66469	11.8531	23.3066	154.944	FALSE	6
2022-09-15	11:18:49	3.45594	15.3727	23.3066	166.86	1	7
2022-09-15	11:18:49	8.77721	39.0428	23.3066	193.987	1	8
2022-09-15	11:18:49	6.06037	26.9577	23.3066	193.818	1	9
2022-09-15	11:18:50	12.9147	57.4472	33.3077	251.434	1	10
2022-09-15	11:18:50	7.26937	32.3356	33.3077	226.154	1	11
2022-09-15	11:18:50	2.27966	10.1404	33.3077	261.574	FALSE	11
2022-09-15	11:18:51	3.29441	14.6542	14.6892	240.808	1	12
2022-09-15	11:18:51	2.73925	12.1847	14.6892	273.759	FALSE	12
2022-09-15	11:18:51	4.12586	18.3527	14.6892	259.161	1	13
2022-09-15	11:18:51	3.04958	13.5651	14.6892	287.324	1	14
2022-09-15	11:18:52	5.00515	22.2639	17.1199	281.425	1	15
2022-09-15	11:18:52	6.93914	30.8667	17.1199	318.191	1	16
2022-09-15	11:18:52	1.93986	8.62889	17.1199	290.053	FALSE	16
2022-09-15	11:18:52	1.51075	6.72012	17.1199	324.911	FALSE	16
2022-09-15	11:18:53	1.3277	5.90588	3.19609	295.959	FALSE	16
2022-09-15	11:18:53	0.61528	2.73689	3.19609	327.648	FALSE	16
2022-09-15	11:18:53	0.409377	1.82099	3.19609	297.78	FALSE	16
2022-09-15	11:18:53	0.521692	2.32059	3.19609	329.969	FALSE	16
2022-09-15	11:18:54	0.536043	2.38443	4.1462	300.165	FALSE	16
2022-09-15	11:18:54	0.231921	1.03163	4.1462	331	FALSE	16
2022-09-15	11:18:54	2.02836	9.02255	4.1462	309.187	FALSE	16
2022-09-15	11:18:55	6.56322	29.1945	22.2031	360.195	1	17
2022-09-15	11:18:55	5.16317	22.9668	22.2031	332.154	1	18
2022-09-15	11:18:55	4.6934	20.8772	22.2031	381.072	1	19
2022-09-15	11:18:55	3.54617	15.7741	22.2031	347.928	1	20
2022-09-15	11:18:56	8.06505	35.875	46.7166	416.947	1	21
2022-09-15	11:18:56	5.95273	26.4789	46.7166	374.407	1	22
2022-09-15	11:18:56	10.1897	45.3258	46.7166	462.273	1	23
2022-09-15	11:18:56	17.802	79.1869	46.7166	453.594	1	24
2022-09-15	11:18:57	7.47853	33.266	56.5963	495.539	1	25
2022-09-15	11:18:57	16.571	73.7111	56.5963	527.305	1	26
2022-09-15	11:18:57	11.7821	52.4091	56.5963	547.948	1	27
2022-09-15	11:18:57	15.062	66.9988	56.5963	594.304	1	28
2022-09-15	11:18:58	23.5241	104.64	60.9394	652.588	1	29
2022-09-15	11:18:58	8.34449	37.118	60.9394	631.422	1	30
2022-09-15	11:18:58	9.23075	41.0602	60.9394	693.648	1	31
2022-09-15	11:18:59	3.69146	16.4204	7.04716	647.842	1	32
2022-09-15	11:18:59	1.71726	7.63872	7.04716	701.287	FALSE	32
2022-09-15	11:18:59	0.632888	2.81521	7.04716	650.657	FALSE	32
2022-09-15	11:18:59	0.295484	1.31437	7.04716	702.601	FALSE	32
2022-09-15	11:19:00	0.567392	2.52387	1.61918	653.181	FALSE	32
2022-09-15	11:19:00	0.173092	0.769948	1.61918	703.371	FALSE	32
2022-09-15	11:19:00	0.398181	1.77119	1.61918	654.952	FALSE	32
2022-09-15	11:19:00	0.317366	1.41171	1.61918	704.783	FALSE	32
2022-09-15	11:19:01	0.393499	1.75036	1.6318	656.703	FALSE	32
2022-09-15	11:19:01	0.275891	1.22722	1.6318	706.01	FALSE	32
2022-09-15	11:19:01	0.377672	1.67996	1.6318	658.383	FALSE	32
2022-09-15	11:19:01	0.420318	1.86966	1.6318	707.88	FALSE	32
2022-09-15	11:19:02	0.635127	2.82517	6.6393	661.208	FALSE	32
2022-09-15	11:19:02	1.84948	8.22686	6.6393	716.106	FALSE	32
2022-09-15	11:19:02	1.99314	8.86589	6.6393	670.074	FALSE	32
2022-09-15	11:19:03	1.64337	7.31004	4.01962	723.417	FALSE	32
2022-09-15	11:19:03	0.856094	3.80808	4.01962	673.882	FALSE	32
2022-09-15	11:19:03	0.866628	3.85493	4.01962	727.271	FALSE	32
2022-09-15	11:19:03	0.248512	1.10543	4.01962	674.987	FALSE	32
2022-09-15	11:19:04	0.261641	1.16383	0.553535	728.435	FALSE	32
2022-09-15	11:19:04	0.226221	1.00628	0.553535	675.994	FALSE	32
2022-09-15	11:19:04	-0.0572898	-0.254836	0.553535	728.435	FALSE	32
2022-09-15	11:19:04	0.0671885	0.298868	0.553535	676.292	FALSE	32
2022-09-15	11:19:05	0.221896	0.987038	2.56454	729.422	FALSE	32
2022-09-15	11:19:05	0.612888	2.72625	2.56454	679.019	FALSE	32
2022-09-15	11:19:05	0.894822	3.98035	2.56454	733.403	FALSE	32
2022-09-15	11:19:06	0.849987	3.78091	4.12811	682.8	FALSE	32
2022-09-15	11:19:06	0.866781	3.85562	4.12811	737.258	FALSE	32
2022-09-15	11:19:06	1.4335	6.37649	4.12811	689.176	FALSE	32
2022-09-15	11:19:06	0.561896	2.49943	4.12811	739.758	FALSE	32
2022-09-15	11:19:07	0.270191	1.20186	0.750762	690.378	FALSE	32
2022-09-15	11:19:07	0.15528	0.690716	0.750762	740.448	FALSE	32
2022-09-15	11:19:07	0.0194023	0.0863053	0.750762	690.464	FALSE	32
2022-09-15	11:19:07	0.230242	1.02416	0.750762	741.473	FALSE	32
2022-09-15	11:19:08	0.32215	1.43299	8.42685	691.897	FALSE	32
2022-09-15	11:19:08	1.40739	6.26035	8.42685	747.733	FALSE	32
2022-09-15	11:19:08	2.33365	10.3805	8.42685	702.278	FALSE	32
2022-09-15	11:19:08	3.51457	15.6335	8.42685	763.366	1	33
2022-09-15	11:19:09	3.88591	17.2853	11.5263	719.563	1	34
2022-09-15	11:19:09	1.9251	8.56323	11.5263	771.93	FALSE	34
2022-09-15	11:19:09	1.96266	8.7303	11.5263	728.293	FALSE	34
2022-09-15	11:19:10	1.72749	7.68422	20.7433	779.614	FALSE	34
2022-09-15	11:19:10	3.29075	14.6379	20.7433	742.931	1	35
2022-09-15	11:19:10	3.91299	17.4058	20.7433	797.02	1	36
2022-09-15	11:19:10	9.72199	43.2454	20.7433	786.177	1	37
2022-09-15	11:19:11	8.71268	38.7557	25.1188	835.775	1	38
2022-09-15	11:19:11	3.81869	16.9863	25.1188	803.163	1	39
2022-09-15	11:19:11	4.42408	19.6792	25.1188	855.455	1	40
2022-09-15	11:19:11	5.63238	25.054	25.1188	828.217	1	41
2022-09-15	11:19:12	6.92663	30.811	18.4874	886.266	1	42
2022-09-15	11:19:12	3.85228	17.1357	18.4874	845.353	1	43
2022-09-15	11:19:12	2.4394	10.8509	18.4874	897.117	FALSE	43
2022-09-15	11:19:12	3.40627	15.1518	18.4874	860.504	1	44
2022-09-15	11:19:13	1.70973	7.60522	5.44867	904.722	FALSE	44
2022-09-15	11:19:13	1.33559	5.94097	5.44867	866.445	FALSE	44
2022-09-15	11:19:13	0.629427	2.79982	5.44867	907.522	FALSE	44
2022-09-15	11:19:14	0.778537	3.46309	2.93287	869.908	FALSE	44
2022-09-15	11:19:14	0.465255	2.06955	2.93287	909.591	FALSE	44
2022-09-15	11:19:14	0.669733	2.97911	2.93287	872.888	FALSE	44
2022-09-15	11:19:14	0.72383	3.21974	2.93287	912.811	FALSE	44
2022-09-15	11:19:15	1.27406	5.66727	3.7671	878.555	FALSE	44
2022-09-15	11:19:15	0.68271	3.03683	3.7671	915.848	FALSE	44
2022-09-15	11:19:15	1.07324	4.77399	3.7671	883.329	FALSE	44
2022-09-15	11:19:15	0.357519	1.59032	3.7671	917.438	FALSE	44
2022-09-15	11:19:16	0.48897	2.17504	1.70209	885.504	FALSE	44
2022-09-15	11:19:16	0.360267	1.60254	1.70209	919.041	FALSE	44
2022-09-15	11:19:16	0.356756	1.58692	1.70209	887.091	FALSE	44
2022-09-15	11:19:16	0.324593	1.44385	1.70209	920.484	FALSE	44
2022-09-15	11:19:17	0.333041	1.48143	2.04834	888.572	FALSE	44
2022-09-15	11:19:17	0.521336	2.31901	2.04834	922.803	FALSE	44
2022-09-15	11:19:17	0.527086	2.34458	2.04834	890.917	FALSE	44
2022-09-15	11:19:18	0.588461	2.61759	9.11773	925.421	FALSE	44
2022-09-15	11:19:18	1.52683	6.79165	9.11773	897.708	FALSE	44
2022-09-15	11:19:18	2.29004	10.1866	9.11773	935.608	FALSE	44
2022-09-15	11:19:18	3.7937	16.8751	9.11773	914.584	1	45
2022-09-15	11:19:19	2.06724	9.1955	4.89614	944.803	FALSE	45
2022-09-15	11:19:19	1.13854	5.06445	4.89614	919.648	FALSE	45
2022-09-15	11:19:19	0.587443	2.61306	4.89614	947.416	FALSE	45
2022-09-15	11:19:19	0.60958	2.71153	4.89614	922.36	FALSE	45
2022-09-15	11:19:20	0.365662	1.62654	1.63446	949.043	FALSE	45
2022-09-15	11:19:20	0.445	1.97945	1.63446	924.339	FALSE	45
2022-09-15	11:19:20	0.249529	1.10995	1.63446	950.153	FALSE	45
2022-09-15	11:19:20	0.40958	1.82189	1.63446	926.161	FALSE	45
2022-09-15	11:19:21	0.335942	1.49434	1.16806	951.647	FALSE	45
2022-09-15	11:19:21	0.288817	1.28472	1.16806	927.446	FALSE	45
2022-09-15	11:19:21	0.163015	0.725123	1.16806	952.372	FALSE	45
2022-09-15	11:19:22	-0.30019	-1.33531	-1.59456	927.446	FALSE	45
2022-09-15	11:19:22	-0.299682	-1.33305	-1.59456	952.372	FALSE	45
2022-09-15	11:19:22	-0.434949	-1.93474	-1.59456	927.446	FALSE	45
2022-09-15	11:19:22	-0.399071	-1.77515	-1.59456	952.372	FALSE	45
2022-09-15	11:19:23	-0.554491	-2.46649	-2.18997	927.446	FALSE	45
2022-09-15	11:19:23	-0.528689	-2.35171	-2.18997	952.372	FALSE	45
2022-09-15	11:19:23	-0.532659	-2.36937	-2.18997	927.446	FALSE	45
2022-09-15	11:19:23	-0.353473	-1.57232	-2.18997	952.372	FALSE	45
2022-09-15	11:19:24	0.0236262	0.105094	6.42176	927.551	FALSE	45
2022-09-15	11:19:24	1.23324	5.4857	6.42176	957.858	FALSE	45
2022-09-15	11:19:24	2.36205	10.5069	6.42176	938.058	FALSE	45
2022-09-15	11:19:24	2.15579	9.58939	6.42176	967.447	FALSE	45
2022-09-15	11:19:25	2.71116	12.0598	8.77723	950.117	FALSE	45
2022-09-15	11:19:25	1.72413	7.66928	8.77723	975.116	FALSE	45
2022-09-15	11:19:25	1.48434	6.60264	8.77723	956.72	FALSE	45
2022-09-15	11:19:26	4.05563	18.0403	16.4283	993.157	1	46
2022-09-15	11:19:26	2.08388	9.26952	16.4283	965.99	FALSE	46
2022-09-15	11:19:26	3.88678	17.2892	16.4283	1010.45	1	47
2022-09-15	11:19:26	4.74668	21.1142	16.4283	987.104	1	48
2022-09-15	11:19:27	3.75889	16.7203	12.2161	1027.17	1	49
2022-09-15	11:19:27	2.70678	12.0403	12.2161	999.144	FALSE	49
2022-09-15	11:19:27	1.01691	4.52342	12.2161	1031.69	FALSE	49
2022-09-15	11:19:27	3.50261	15.5803	12.2161	1014.72	1	50
2022-09-15	11:19:28	1.8078	8.04146	10.7493	1039.73	FALSE	50
2022-09-15	11:19:28	2.01645	8.96957	10.7493	1023.69	FALSE	50
2022-09-15	11:19:28	3.58648	15.9534	10.7493	1055.68	1	51
2022-09-15	11:19:28	2.25543	10.0326	10.7493	1033.73	FALSE	51
2022-09-15	11:19:29	1.98169	8.81495	7.66416	1064.5	FALSE	51
2022-09-15	11:19:29	1.46108	6.49918	7.66416	1040.23	FALSE	51
2022-09-15	11:19:29	1.72617	7.67835	7.66416	1072.18	FALSE	51
2022-09-15	11:19:30	1.66994	7.42823	3.66847	1047.65	FALSE	51
2022-09-15	11:19:30	0.628511	2.79574	3.66847	1074.97	FALSE	51
2022-09-15	11:19:30	0.292532	1.30124	3.66847	1048.96	FALSE	51
2022-09-15	11:19:30	0.70785	3.14866	3.66847	1078.12	FALSE	51
2022-09-15	11:19:31	0.244593	1.088	1.02818	1050.04	FALSE	51
2022-09-15	11:19:31	0.178232	0.792812	1.02818	1078.91	FALSE	51
2022-09-15	11:19:31	0.299911	1.33406	1.02818	1051.38	FALSE	51
2022-09-15	11:19:31	0.201845	0.897847	1.02818	1079.81	FALSE	51
2022-09-15	11:19:32	0.166629	0.741199	1.28438	1052.12	FALSE	51
2022-09-15	11:19:32	0.288715	1.28426	1.28438	1081.1	FALSE	51
2022-09-15	11:19:32	0.287239	1.2777	1.28438	1053.4	FALSE	51
2022-09-15	11:19:32	0.412379	1.83434	1.28438	1082.93	FALSE	51
2022-09-15	11:19:33	0.278842	1.24034	2.28837	1054.64	FALSE	51
2022-09-15	11:19:33	0.746578	3.32093	2.28837	1086.25	FALSE	51
2022-09-15	11:19:33	0.517926	2.30384	2.28837	1056.94	FALSE	51
2022-09-15	11:19:34	0.985611	4.38419	5.90055	1090.64	FALSE	51
2022-09-15	11:19:34	1.84816	8.22099	5.90055	1065.16	FALSE	51
2022-09-15	11:19:34	1.17859	5.2426	5.90055	1095.88	FALSE	51
2022-09-15	11:19:34	1.29365	5.75441	5.90055	1070.92	FALSE	51
2022-09-15	11:19:35	0.499758	2.22302	4.88775	1098.1	FALSE	51
2022-09-15	11:19:35	1.13838	5.06374	4.88775	1075.98	FALSE	51
2022-09-15	11:19:35	1.67141	7.43477	4.88775	1105.54	FALSE	51
2022-09-15	11:19:35	1.08571	4.82946	4.88775	1080.81	FALSE	51
2022-09-15	11:19:36	1.50098	6.67666	5.54825	1112.21	FALSE	51
2022-09-15	11:19:36	1.09503	4.87091	5.54825	1085.68	FALSE	51
2022-09-15	11:19:36	1.52123	6.76674	5.54825	1118.98	FALSE	51
2022-09-15	11:19:36	0.871972	3.87871	5.54825	1089.56	FALSE	51
2022-09-15	11:19:37	1.70093	7.56608	6.52469	1126.55	FALSE	51
2022-09-15	11:19:37	1.3392	5.95703	6.52469	1095.52	FALSE	51
2022-09-15	11:19:37	1.36032	6.05098	6.52469	1132.6	FALSE	51
2022-09-15	11:19:38	0.26612	1.18375	1.77068	1096.7	FALSE	51
2022-09-15	11:19:38	0.425254	1.89161	1.77068	1134.49	FALSE	51
2022-09-15	11:19:38	0.357723	1.59122	1.77068	1098.29	FALSE	51
2022-09-15	11:19:38	0.543168	2.41612	1.77068	1136.91	FALSE	51
2022-09-15	11:19:39	0.607951	2.70429	2.39133	1100.99	FALSE	51
2022-09-15	11:19:39	0.52897	2.35296	2.39133	1139.26	FALSE	51
2022-09-15	11:19:39	0.538588	2.39575	2.39133	1103.39	FALSE	51
2022-09-15	11:19:39	0.474873	2.11233	2.39133	1141.37	FALSE	51
2022-09-15	11:19:40	0.387748	1.72478	1.52112	1105.12	FALSE	51
2022-09-15	11:19:40	0.396909	1.76553	1.52112	1143.14	FALSE	51
2022-09-15	11:19:40	0.241234	1.07306	1.52112	1106.19	FALSE	51
2022-09-15	11:19:41	0.109122	0.485396	0.730331	1143.62	FALSE	51
2022-09-15	11:19:41	0.2364	1.05155	0.730331	1107.24	FALSE	51
2022-09-15	11:19:41	0.247697	1.10181	0.730331	1144.72	FALSE	51
2022-09-15	11:19:41	0.0635244	0.282569	0.730331	1107.52	FALSE	51
2022-09-15	11:19:42	0.175687	0.781491	1.48268	1145.5	FALSE	51
2022-09-15	11:19:42	0.199809	0.88879	1.48268	1108.41	FALSE	51
2022-09-15	11:19:42	0.183219	0.814995	1.48268	1146.32	FALSE	51
2022-09-15	11:19:42	0.774568	3.44543	1.48268	1111.86	FALSE	51
2022-09-15	11:19:43	1.86291	8.2866	24.3072	1154.61	FALSE	51
2022-09-15	11:19:43	9.30159	41.3753	24.3072	1153.23	1	52
2022-09-15	11:19:43	5.02978	22.3735	24.3072	1176.98	1	53
2022-09-15	11:19:43	5.66372	25.1934	24.3072	1178.43	1	54
2022-09-15	11:19:44	1.87508	8.34073	9.94705	1185.32	FALSE	54
2022-09-15	11:19:44	2.31462	10.2959	9.94705	1188.72	FALSE	54
2022-09-15	11:19:44	2.51889	11.2045	9.94705	1196.52	FALSE	54
2022-09-15	11:19:45	0.896298	3.98691	3.35539	1192.71	FALSE	54
2022-09-15	11:19:45	0.911463	4.05437	3.35539	1200.58	FALSE	54
2022-09-15	11:19:45	0.310191	1.37979	3.35539	1194.09	FALSE	54
2022-09-15	11:19:45	0.899351	4.00049	3.35539	1204.58	FALSE	54
2022-09-15	11:19:46	1.17024	5.20546	20.0659	1199.29	FALSE	54
2022-09-15	11:19:46	3.86195	17.1787	20.0659	1221.76	1	55
2022-09-15	11:19:46	8.43675	37.5284	20.0659	1236.82	1	56
2022-09-15	11:19:46	4.57512	20.351	20.0659	1242.11	1	57
2022-09-15	11:19:47	4.15691	18.4908	11.6704	1255.31	1	58
2022-09-15	11:19:47	3.05258	13.5785	11.6704	1255.69	1	59
2022-09-15	11:19:47	1.2509	5.56425	11.6704	1260.88	FALSE	59
2022-09-15	11:19:47	2.03411	9.04813	11.6704	1264.74	FALSE	59
2022-09-15	11:19:48	1.9166	8.52542	11.9605	1269.4	FALSE	59
2022-09-15	11:19:48	2.62592	11.6806	11.9605	1276.42	FALSE	59
2022-09-15	11:19:48	3.52398	15.6754	11.9605	1285.08	1	60
2022-09-15	11:19:49	3.31151	14.7303	15.5473	1291.15	1	61
2022-09-15	11:19:49	3.74022	16.6372	15.5473	1301.71	1	62
2022-09-15	11:19:49	2.69996	12.01	15.5473	1303.16	FALSE	62
2022-09-15	11:19:49	4.22907	18.8117	15.5473	1320.53	1	63
2022-09-15	11:19:50	2.85747	12.7106	11.6136	1315.87	FALSE	63
2022-09-15	11:19:50	2.94698	13.1088	11.6136	1333.64	FALSE	63
2022-09-15	11:19:50	2.5479	11.3336	11.6136	1327.2	FALSE	63
2022-09-15	11:19:50	2.09111	9.30168	11.6136	1342.94	FALSE	63
2022-09-15	11:19:51	2.11915	9.4264	5.88306	1336.63	FALSE	63
2022-09-15	11:19:51	1.63126	7.25617	5.88306	1350.19	FALSE	63
2022-09-15	11:19:51	0.954924	4.24769	5.88306	1340.88	FALSE	63
2022-09-15	11:19:51	0.584949	2.60197	5.88306	1352.8	FALSE	63
2022-09-15	11:19:52	0.3164	1.40741	1.7484	1342.28	FALSE	63
2022-09-15	11:19:52	0.655382	2.91527	1.7484	1355.71	FALSE	63
2022-09-15	11:19:52	0.207392	0.922521	1.7484	1343.21	FALSE	63
2022-09-15	11:19:53	0.333957	1.48551	0.876455	1357.2	FALSE	63
2022-09-15	11:19:53	0.0950766	0.42292	0.876455	1343.63	FALSE	63
2022-09-15	11:19:53	0.22042	0.980472	0.876455	1358.18	FALSE	63
2022-09-15	11:19:53	0.13869	0.616921	0.876455	1344.25	FALSE	63
2022-09-15	11:19:54	0.268766	1.19552	0.89213	1359.37	FALSE	63
2022-09-15	11:19:54	0.0678501	0.301811	0.89213	1344.55	FALSE	63
2022-09-15	11:19:54	0.231412	1.02937	0.89213	1360.4	FALSE	63
2022-09-15	11:19:54	0.234211	1.04182	0.89213	1345.59	FALSE	63
2022-09-15	11:19:55	0.116451	0.517997	1.2567	1360.92	FALSE	63
2022-09-15	11:19:55	0.31416	1.39745	1.2567	1346.99	FALSE	63
2022-09-15	11:19:55	0.266629	1.18602	1.2567	1362.11	FALSE	63
2022-09-15	11:19:55	0.432837	1.92535	1.2567	1348.91	FALSE	63
2022-09-15	11:19:56	0.25757	1.14572	1.53222	1363.25	FALSE	63
2022-09-15	11:19:56	0.419199	1.86468	1.53222	1350.78	FALSE	63
2022-09-15	11:19:56	0.356603	1.58624	1.53222	1364.84	FALSE	63
2022-09-15	11:19:57	0.456501	2.03061	1.56332	1352.81	FALSE	63
2022-09-15	11:19:57	0.393448	1.75014	1.56332	1366.59	FALSE	63
2022-09-15	11:19:57	0.240064	1.06785	1.56332	1353.87	FALSE	63
2022-09-15	11:19:57	0.315789	1.40469	1.56332	1367.99	FALSE	63
2022-09-15	11:19:58	0.220267	0.979792	1.00283	1354.85	FALSE	63
2022-09-15	11:19:58	0.380013	1.69037	1.00283	1369.68	FALSE	63
2022-09-15	11:19:58	0.0925829	0.411827	1.00283	1355.27	FALSE	63
2022-09-15	11:19:58	0.208919	0.929313	1.00283	1370.61	FALSE	63
2022-09-15	11:19:59	0.179962	0.800507	0.97685	1356.07	FALSE	63
2022-09-15	11:19:59	0.324288	1.4425	0.97685	1372.05	FALSE	63
2022-09-15	11:19:59	0.138537	0.61624	0.97685	1356.68	FALSE	63
2022-09-15	11:19:59	0.235636	1.04816	0.97685	1373.1	FALSE	63
2022-09-15	11:20:00	0.375484	1.67023	1.14867	1358.35	FALSE	63
2022-09-15	11:20:00	0.0732445	0.325806	1.14867	1373.43	FALSE	63
2022-09-15	11:20:00	0.325967	1.44997	1.14867	1359.8	FALSE	63
2022-09-15	11:20:01	0.170649	0.759081	0.928407	1374.19	FALSE	63
2022-09-15	11:20:01	0.246985	1.09864	0.928407	1360.9	FALSE	63
2022-09-15	11:20:01	0.194975	0.867288	0.928407	1375.05	FALSE	63
2022-09-15	11:20:01	0.222252	0.988621	0.928407	1361.89	FALSE	63
2022-09-15	11:20:02	0.560929	2.49512	11.5452	1377.55	FALSE	63
2022-09-15	11:20:02	0.80215	3.56812	11.5452	1365.46	FALSE	63
2022-09-15	11:20:02	2.67986	11.9206	11.5452	1389.47	FALSE	63
2022-09-15	11:20:02	6.33894	28.1969	11.5452	1393.66	1	64
2022-09-15	11:20:03	8.24937	36.6948	21.0863	1426.17	1	65
2022-09-15	11:20:03	4.71981	20.9947	21.0863	1414.65	1	66
2022-09-15	11:20:03	3.97533	17.6831	21.0863	1443.85	1	67
2022-09-15	11:20:03	2.01711	8.97251	21.0863	1423.62	FALSE	67
2022-09-15	11:20:04	0.278792	1.24012	3.9645	1445.09	FALSE	67
2022-09-15	11:20:04	0.840623	3.73926	3.9645	1427.36	FALSE	67
2022-09-15	11:20:04	1.55436	6.9141	3.9645	1452	FALSE	67
2022-09-15	11:20:05	6.13721	27.2995	62.1517	1454.66	1	68
2022-09-15	11:20:05	12.1089	53.8628	62.1517	1505.87	1	69
2022-09-15	11:20:05	18.5966	82.7214	62.1517	1537.38	1	70
2022-09-15	11:20:05	19.0466	84.7231	62.1517	1590.59	1	71
2022-09-15	11:20:06	2.96296	13.1798	23.7342	1550.56	FALSE	71
2022-09-15	11:20:06	4.90632	21.8243	23.7342	1612.41	1	72
2022-09-15	11:20:06	1.7708	7.87687	23.7342	1558.44	FALSE	72
2022-09-15	11:20:06	11.7027	52.056	23.7342	1664.47	1	73
2022-09-15	11:20:07	3.04912	13.5631	23.6705	1572	1	74
2022-09-15	11:20:07	2.9853	13.2792	23.6705	1677.75	FALSE	74
2022-09-15	11:20:07	5.23421	23.2828	23.6705	1595.29	1	75
2022-09-15	11:20:07	10.0168	44.5567	23.6705	1722.3	1	76
2022-09-15	11:20:08	18.2244	81.0658	34.318	1676.35	1	77
2022-09-15	11:20:08	4.06825	18.0964	34.318	1740.4	1	78
2022-09-15	11:20:08	0.85243	3.79178	34.318	1680.14	FALSE	78
2022-09-15	11:20:09	0.283422	1.26072	3.40565	1741.66	FALSE	78
2022-09-15	11:20:09	-0.0197326	-0.0877746	3.40565	1680.14	FALSE	78
2022-09-15	11:20:09	0.498028	2.21533	3.40565	1743.88	FALSE	78
2022-09-15	11:20:09	2.30078	10.2343	3.40565	1690.38	FALSE	78
2022-09-15	11:20:10	2.71309	12.0684	4.79998	1755.95	FALSE	78
2022-09-15	11:20:10	1.00561	4.47315	4.79998	1694.85	FALSE	78
2022-09-15	11:20:10	0.105356	0.468645	4.79998	1756.41	FALSE	78
2022-09-15	11:20:10	0.492277	2.18975	4.79998	1697.04	FALSE	78
2022-09-15	11:20:11	2.97131	13.217	29.7458	1769.63	FALSE	78
2022-09-15	11:20:11	10.4297	46.3934	29.7458	1743.43	1	79
2022-09-15	11:20:11	9.51278	42.3147	29.7458	1811.95	1	80
2022-09-15	11:20:11	3.83482	17.058	29.7458	1760.49	1	81
2022-09-15	11:20:12	3.82556	17.0169	12.0196	1828.96	1	82
2022-09-15	11:20:12	1.6592	7.38045	12.0196	1767.87	FALSE	82
2022-09-15	11:20:12	2.62164	11.6616	12.0196	1840.62	FALSE	82
2022-09-15	11:20:13	2.15594	9.59005	10.1908	1777.46	FALSE	82
2022-09-15	11:20:13	2.53141	11.2602	10.1908	1851.88	FALSE	82
2022-09-15	11:20:13	1.52775	6.79574	10.1908	1784.26	FALSE	82
2022-09-15	11:20:13	2.94887	13.1172	10.1908	1865	FALSE	82
2022-09-15	11:20:14	3.1365	13.9518	13.9018	1798.21	1	83
2022-09-15	11:20:14	3.38261	15.0465	13.9018	1880.05	1	84
2022-09-15	11:20:14	2.99431	13.3193	13.9018	1811.53	FALSE	84
2022-09-15	11:20:14	2.98765	13.2897	13.9018	1893.34	FALSE	84
2022-09-15	11:20:15	3.09548	13.7693	11.1937	1825.3	1	85
2022-09-15	11:20:15	1.60169	7.12464	11.1937	1900.46	FALSE	85
2022-09-15	11:20:15	2.85217	12.687	11.1937	1837.99	FALSE	85
2022-09-15	11:20:16	0.748766	3.33066	3.91515	1903.79	FALSE	85
2022-09-15	11:20:16	1.34373	5.97718	3.91515	1843.96	FALSE	85
2022-09-15	11:20:16	0.580573	2.5825	3.91515	1906.38	FALSE	85
2022-09-15	11:20:16	0.847595	3.77027	3.91515	1847.73	FALSE	85
2022-09-15	11:20:17	1.12098	4.98634	3.68969	1911.36	FALSE	85
2022-09-15	11:20:17	0.95528	4.24928	3.68969	1851.98	FALSE	85
2022-09-15	11:20:17	0.8764	3.8984	3.68969	1915.26	FALSE	85
2022-09-15	11:20:17	0.365255	1.62473	3.68969	1853.61	FALSE	85
2022-09-15	11:20:18	0.693499	3.08482	3.35075	1918.35	FALSE	85
2022-09-15	11:20:18	0.976043	4.34163	3.35075	1857.95	FALSE	85
2022-09-15	11:20:18	0.7193	3.19959	3.35075	1921.54	FALSE	85
2022-09-15	11:20:18	0.624287	2.77695	3.35075	1860.73	FALSE	85
2022-09-15	11:20:19	0.577723	2.56983	1.61228	1924.11	FALSE	85
2022-09-15	11:20:19	0.191565	0.852119	1.61228	1861.58	FALSE	85
2022-09-15	11:20:19	0.318079	1.41488	1.61228	1925.53	FALSE	85
2022-09-15	11:20:20	0.745203	3.31481	7.62656	1864.89	FALSE	85
2022-09-15	11:20:20	1.6281	7.24211	7.62656	1932.77	FALSE	85
2022-09-15	11:20:20	1.69162	7.52466	7.62656	1872.42	FALSE	85
2022-09-15	11:20:20	2.79319	12.4247	7.62656	1945.2	FALSE	85
2022-09-15	11:20:21	2.94184	13.0859	8.52526	1885.5	FALSE	85
2022-09-15	11:20:21	1.07396	4.77719	8.52526	1949.97	FALSE	85
2022-09-15	11:20:21	2.11075	9.38904	8.52526	1894.89	FALSE	85
2022-09-15	11:20:21	1.53971	6.84894	8.52526	1956.82	FALSE	85
2022-09-15	11:20:22	2.20612	9.81326	3.72557	1904.71	FALSE	85
2022-09-15	11:20:22	0.547697	2.43627	3.72557	1959.26	FALSE	85
2022-09-15	11:20:22	0.503422	2.23932	3.72557	1906.94	FALSE	85
2022-09-15	11:20:22	0.0929391	0.413412	3.72557	1959.67	FALSE	85
2022-09-15	11:20:23	-0.260954	-1.16078	-1.14885	1906.94	FALSE	85
2022-09-15	11:20:23	-0.30757	-1.36813	-1.14885	1959.67	FALSE	85
2022-09-15	11:20:23	-0.206297	-0.91765	-1.14885	1906.94	FALSE	85
2022-09-15	11:20:24	0.102659	0.456648	0.0762876	1960.13	FALSE	85
2022-09-15	11:20:24	-0.0989183	-0.440008	0.0762876	1906.94	FALSE	85
2022-09-15	11:20:24	0.120318	0.535199	0.0762876	1960.66	FALSE	85
2022-09-15	11:20:24	-0.0554578	-0.246687	0.0762876	1906.94	FALSE	85
2022-09-15	11:20:25	0.148359	0.659931	0.613185	1961.32	FALSE	85
2022-09-15	11:20:25	-0.00919824	-0.0409156	0.613185	1906.94	FALSE	85
2022-09-15	11:20:25	0.170395	0.757951	0.613185	1962.08	FALSE	85
2022-09-15	11:20:25	0.241845	1.07577	0.613185	1908.02	FALSE	85
2022-09-15	11:20:26	0.229428	1.02054	0.90543	1963.1	FALSE	85
2022-09-15	11:20:26	0.0953819	0.424278	0.90543	1908.44	FALSE	85
2022-09-15	11:20:26	0.119453	0.531351	0.90543	1963.63	FALSE	85
2022-09-15	11:20:26	0.369936	1.64555	0.90543	1910.09	FALSE	85
2022-09-15	11:20:27	0.142659	0.634576	1.60058	1964.27	FALSE	85
2022-09-15	11:20:27	0.423728	1.88483	1.60058	1911.97	FALSE	85
2022-09-15	11:20:27	0.513092	2.28234	1.60058	1966.55	FALSE	85
2022-09-15	11:20:28	0.989733	4.40253	2.90248	1916.38	FALSE	85
2022-09-15	11:20:28	1.05243	4.68142	2.90248	1971.23	FALSE	85
2022-09-15	11:20:28	0.470395	2.09241	2.90248	1918.47	FALSE	85
2022-09-15	11:20:28	0.0974684	0.433559	2.90248	1971.67	FALSE	85
2022-09-15	11:20:29	0.315076	1.40152	1.06349	1919.87	FALSE	85
2022-09-15	11:20:29	0.164186	0.730332	1.06349	1972.4	FALSE	85
2022-09-15	11:20:29	0.301896	1.34289	1.06349	1921.21	FALSE	85
2022-09-15	11:20:29	0.175178	0.779227	1.06349	1973.18	FALSE	85
2022-09-15	11:20:30	0.207799	0.924332	1.49394	1922.14	FALSE	85
2022-09-15	11:20:30	0.581132	2.58499	1.49394	1975.76	FALSE	85
2022-09-15	11:20:30	0.259708	1.15523	1.49394	1923.29	FALSE	85
2022-09-15	11:20:30	0.294771	1.3112	1.49394	1977.07	FALSE	85
2022-09-15	11:20:31	0.317876	1.41398	3.67497	1924.71	FALSE	85
2022-09-15	11:20:31	0.570445	2.53745	3.67497	1979.61	FALSE	85
2022-09-15	11:20:31	1.59019	7.07348	3.67497	1931.78	FALSE	85
2022-09-15	11:20:32	4.35879	19.3888	30.0449	1999	1	86
2022-09-15	11:20:32	5.76057	25.6242	30.0449	1957.41	1	87
2022-09-15	11:20:32	6.93777	30.8606	30.0449	2029.86	1	88
2022-09-15	11:20:32	9.96041	44.3059	30.0449	2001.71	1	89
2022-09-15	11:20:33	16.1208	71.7085	63.8492	2101.57	1	90
2022-09-15	11:20:33	10.3716	46.135	63.8492	2047.85	1	91
2022-09-15	11:20:33	11.7409	52.2259	63.8492	2153.79	1	92
2022-09-15	11:20:33	19.1825	85.3276	63.8492	2133.17	1	93
2022-09-15	11:20:34	8.61207	38.3082	24.3335	2192.1	1	94
2022-09-15	11:20:34	5.21166	23.1825	24.3335	2156.36	1	95
2022-09-15	11:20:34	3.97614	17.6867	24.3335	2209.79	1	96
2022-09-15	11:20:34	4.08179	18.1566	24.3335	2174.51	1	97
2022-09-15	11:20:35	3.10775	13.8239	12.3771	2223.61	1	98
2022-09-15	11:20:35	2.98016	13.2563	12.3771	2187.77	FALSE	98
2022-09-15	11:20:35	2.25961	10.0512	12.3771	2233.66	FALSE	98
2022-09-15	11:20:36	1.931	8.58947	7.91145	2196.36	FALSE	98
2022-09-15	11:20:36	2.3819	10.5952	7.91145	2244.26	FALSE	98
2022-09-15	11:20:36	1.84912	8.22526	7.91145	2204.58	FALSE	98
2022-09-15	11:20:36	0.952277	4.23592	7.91145	2248.49	FALSE	98
2022-09-15	11:20:37	1.83808	8.17615	11.7821	2212.76	FALSE	98
2022-09-15	11:20:37	2.78861	12.4043	11.7821	2260.9	FALSE	98
2022-09-15	11:20:37	2.61502	11.6321	11.7821	2224.39	FALSE	98
2022-09-15	11:20:37	3.35319	14.9157	11.7821	2275.81	1	99
2022-09-15	11:20:38	4.59528	20.4407	30.1419	2244.83	1	100
2022-09-15	11:20:38	7.40943	32.9586	30.1419	2308.77	1	101
2022-09-15	11:20:38	6.11858	27.2167	30.1419	2272.05	1	102
2022-09-15	11:20:38	8.98148	39.9514	30.1419	2348.72	1	103
2022-09-15	11:20:39	11.7145	52.1084	37.667	2324.16	1	104
2022-09-15	11:20:39	8.7482	38.9137	37.667	2387.64	1	105
2022-09-15	11:20:39	4.94108	21.9789	37.667	2346.14	1	106
2022-09-15	11:20:40	4.90256	21.8076	34.4876	2409.44	1	107
2022-09-15	11:20:40	7.95919	35.4041	34.4876	2381.54	1	108
2022-09-15	11:20:40	10.2421	45.5589	34.4876	2455	1	109
2022-09-15	11:20:40	7.90876	35.1797	34.4876	2416.72	1	110
2022-09-15	11:20:41	5.63726	25.0757	26.0871	2480.08	1	111
2022-09-15	11:20:41	6.10332	27.1488	26.0871	2443.87	1	112
2022-09-15	11:20:41	6.96067	30.9625	26.0871	2511.04	1	113
2022-09-15	11:20:41	4.75731	21.1615	26.0871	2465.03	1	114
2022-09-15	11:20:42	3.26632	14.5292	18.3267	2525.57	1	115
2022-09-15	11:20:42	3.32927	14.8093	18.3267	2479.84	1	116
2022-09-15	11:20:42	4.91681	21.871	18.3267	2547.44	1	117
2022-09-15	11:20:42	4.96774	22.0975	18.3267	2501.94	1	118
2022-09-15	11:20:43	4.5936	20.4333	17.0994	2567.88	1	119
2022-09-15	11:20:43	3.81492	16.9695	17.0994	2518.91	1	120
2022-09-15	11:20:43	3.12383	13.8954	17.0994	2581.77	1	121
2022-09-15	11:20:44	1.32561	5.89658	2.98918	2524.8	FALSE	121
2022-09-15	11:20:44	0.45472	2.02269	2.98918	2583.79	FALSE	121
2022-09-15	11:20:44	0.448206	1.99371	2.98918	2526.8	FALSE	121
2022-09-15	11:20:44	0.459453	2.04374	2.98918	2585.84	FALSE	121
2022-09-15	11:20:45	0.497367	2.21239	1.99264	2529.01	FALSE	121
2022-09-15	11:20:45	0.862608	3.83705	1.99264	2589.67	FALSE	121
2022-09-15	11:20:45	0.257926	1.14731	1.99264	2530.16	FALSE	121
2022-09-15	11:20:45	0.173957	0.773796	1.99264	2590.45	FALSE	121
2022-09-15	11:20:46	0.208257	0.926369	0.285851	2531.08	FALSE	121
2022-09-15	11:20:46	0.117672	0.523429	0.285851	2590.97	FALSE	121
2022-09-15	11:20:46	-0.0585112	-0.26027	0.285851	2531.08	FALSE	121
2022-09-15	11:20:46	-0.0103687	-0.0461221	0.285851	2590.97	FALSE	121
2022-09-15	11:20:47	-0.0326079	-0.145046	-0.637706	2531.08	FALSE	121
2022-09-15	11:20:47	-0.0919462	-0.408995	-0.637706	2590.97	FALSE	121
2022-09-15	11:20:47	-0.305534	-1.35908	-0.637706	2531.08	FALSE	121
2022-09-15	11:20:48	-0.156119	-0.694449	3.68498	2590.97	FALSE	121
2022-09-15	11:20:48	-0.124618	-0.554326	3.68498	2531.08	FALSE	121
2022-09-15	11:20:48	0.0931427	0.414317	3.68498	2591.39	FALSE	121
2022-09-15	11:20:48	3.50128	15.5744	3.68498	2546.66	1	122
2022-09-15	11:20:49	3.12149	13.885	18.7327	2605.27	1	123
2022-09-15	11:20:49	7.28678	32.4131	18.7327	2579.07	1	124
2022-09-15	11:20:49	2.22566	9.90018	18.7327	2615.17	FALSE	124
2022-09-15	11:20:50	4.95971	22.0618	12.8186	2601.13	1	125
2022-09-15	11:20:50	3.54225	15.7566	12.8186	2630.93	1	126
2022-09-15	11:20:50	0.648562	2.88493	12.8186	2604.02	FALSE	126
2022-09-15	11:20:50	3.05024	13.5681	12.8186	2644.5	1	127
2022-09-15	11:20:50	2.208	9.82163	12.8186	2613.84	FALSE	127
2022-09-15	11:20:51	1.96017	8.71923	7.32779	2653.21	FALSE	127
2022-09-15	11:20:51	2.33981	10.4079	7.32779	2624.25	FALSE	127
2022-09-15	11:20:51	0.642099	2.85618	7.32779	2656.07	FALSE	127
2022-09-15	11:20:52	1.32561	5.89658	4.53377	2630.14	FALSE	127
2022-09-15	11:20:52	1.53747	6.83897	4.53377	2662.91	FALSE	127
2022-09-15	11:20:52	0.285255	1.26887	4.53377	2631.41	FALSE	127
2022-09-15	11:20:52	0.928613	4.13066	4.53377	2667.04	FALSE	127
2022-09-15	11:20:53	0.394211	1.75353	1.13639	2633.17	FALSE	127
2022-09-15	11:20:53	0.48785	2.17005	1.13639	2669.21	FALSE	127
2022-09-15	11:20:53	0.272634	1.21273	1.13639	2634.38	FALSE	127
2022-09-15	11:20:53	-0.132811	-0.59077	1.13639	2669.21	FALSE	127
2022-09-15	11:20:54	-0.6636	-2.95183	-0.855231	2634.38	FALSE	127
2022-09-15	11:20:54	-0.302023	-1.34346	-0.855231	2669.21	FALSE	127
2022-09-15	11:20:54	0.122812	0.546292	-0.855231	2634.93	FALSE	127
2022-09-15	11:20:54	0.0737534	0.32807	-0.855231	2669.54	FALSE	127
2022-09-15	11:20:55	0.254008	1.12988	1.45706	2636.06	FALSE	127
2022-09-15	11:20:55	0.412023	1.83276	1.45706	2671.37	FALSE	127
2022-09-15	11:20:55	0.316654	1.40854	1.45706	2637.46	FALSE	127
2022-09-15	11:20:56	0.870547	3.87237	3.71617	2675.24	FALSE	127
2022-09-15	11:20:56	0.573397	2.55058	3.71617	2640.01	FALSE	127
2022-09-15	11:20:56	0.930293	4.13813	3.71617	2679.38	FALSE	127
2022-09-15	11:20:56	0.967494	4.30361	3.71617	2644.32	FALSE	127
2022-09-15	11:20:57	0.984796	4.38057	5.60615	2683.76	FALSE	127
2022-09-15	11:20:57	1.49523	6.65108	5.60615	2650.97	FALSE	127
2022-09-15	11:20:57	0.786425	3.49818	5.60615	2687.26	FALSE	127
2022-09-15	11:20:57	1.77482	7.89475	5.60615	2658.86	FALSE	127
2022-09-15	11:20:58	0.989326	4.40072	3.48361	2691.66	FALSE	127
2022-09-15	11:20:58	0.78215	3.47916	3.48361	2662.34	FALSE	127
2022-09-15	11:20:58	0.577977	2.57096	3.48361	2694.23	FALSE	127
2022-09-15	11:20:59	0.587239	2.61216	2.08777	2664.96	FALSE	127
2022-09-15	11:20:59	0.232685	1.03503	2.08777	2695.27	FALSE	127
2022-09-15	11:20:59	0.4936	2.19563	2.08777	2667.15	FALSE	127
2022-09-15	11:20:59	0.56388	2.50825	2.08777	2697.78	FALSE	127
2022-09-15	11:21:00	0.712176	3.1679	3.21187	2670.32	FALSE	127
2022-09-15	11:21:00	0.721234	3.20819	3.21187	2700.98	FALSE	127
2022-09-15	11:21:00	0.728104	3.23875	3.21187	2673.56	FALSE	127
2022-09-15	11:21:00	0.72673	3.23264	3.21187	2704.22	FALSE	127
2022-09-15	11:21:01	0.723524	3.21838	2.69535	2676.78	FALSE	127
2022-09-15	11:21:01	0.731158	3.25234	2.69535	2707.47	FALSE	127
2022-09-15	11:21:01	0.530903	2.36156	2.69535	2679.14	FALSE	127
2022-09-15	11:21:01	0.438181	1.94912	2.69535	2709.42	FALSE	127
2022-09-15	11:21:02	1.07197	4.76834	21.3765	2683.91	FALSE	127
2022-09-15	11:21:02	3.688	16.405	21.3765	2725.82	1	128
2022-09-15	11:21:02	9.65696	42.9561	21.3765	2726.86	1	129
2022-09-15	11:21:03	12.3789	55.0638	35.262	2780.89	1	130
2022-09-15	11:21:03	11.1639	49.6593	35.262	2776.52	1	131
2022-09-15	11:21:03	2.64561	11.7682	35.262	2792.66	FALSE	131
2022-09-15	11:21:03	5.52062	24.5568	35.262	2801.08	1	132
2022-09-15	11:21:04	4.33029	19.262	11.5293	2811.92	1	133
2022-09-15	11:21:04	0.978181	4.35114	11.5293	2805.43	FALSE	133
2022-09-15	11:21:04	2.07747	9.241	11.5293	2821.16	FALSE	133
2022-09-15	11:21:04	2.98169	13.2632	11.5293	2818.69	FALSE	133
2022-09-15	11:21:05	1.5795	7.02593	7.21349	2828.18	FALSE	133
2022-09-15	11:21:05	0.726832	3.23309	7.21349	2821.93	FALSE	133
2022-09-15	11:21:05	0.752227	3.34606	7.21349	2831.53	FALSE	133
2022-09-15	11:21:05	3.4281	15.2489	7.21349	2837.17	1	134
2022-09-15	11:21:06	0.922863	4.10508	7.78799	2835.64	FALSE	134
2022-09-15	11:21:06	1.38144	6.14492	7.78799	2843.32	FALSE	134
2022-09-15	11:21:06	2.94815	13.114	7.78799	2848.75	FALSE	134
2022-09-15	11:21:07	2.03243	9.04066	12.6398	2852.36	FALSE	134
2022-09-15	11:21:07	4.34907	19.3455	12.6398	2868.09	1	135
2022-09-15	11:21:07	2.20027	9.78724	12.6398	2862.15	FALSE	135
2022-09-15	11:21:07	2.78449	12.386	12.6398	2880.48	FALSE	135
2022-09-15	11:21:08	1.59874	7.11152	4.99697	2869.26	FALSE	135
2022-09-15	11:21:08	1.00454	4.46839	4.99697	2884.95	FALSE	135
2022-09-15	11:21:08	1.64352	7.31071	4.99697	2876.57	FALSE	135
2022-09-15	11:21:08	0.246679	1.09728	4.99697	2886.05	FALSE	135
2022-09-15	11:21:09	0.362659	1.61318	4.65939	2878.18	FALSE	135
2022-09-15	11:21:09	1.27843	5.68671	4.65939	2891.73	FALSE	135
2022-09-15	11:21:09	0.686985	3.05585	4.65939	2881.24	FALSE	135
2022-09-15	11:21:09	1.86184	8.28184	4.65939	2900.01	FALSE	135
2022-09-15	11:21:10	3.22306	14.3368	13.4041	2895.58	1	136
2022-09-15	11:21:10	3.628	16.1381	13.4041	2916.15	1	137
2022-09-15	11:21:10	2.18907	9.73742	13.4041	2905.31	FALSE	137
2022-09-15	11:21:11	2.27375	10.1141	14.6914	2926.27	FALSE	137
2022-09-15	11:21:11	5.38897	23.9712	14.6914	2929.28	1	138
2022-09-15	11:21:11	2.63513	11.7216	14.6914	2937.99	FALSE	138
2022-09-15	11:21:11	2.91329	12.9589	14.6914	2942.24	FALSE	138
2022-09-15	11:21:12	2.4652	10.9657	13.4197	2948.95	FALSE	138
2022-09-15	11:21:12	1.73156	7.70233	13.4197	2949.95	FALSE	138
2022-09-15	11:21:12	4.69462	20.8826	13.4197	2969.84	1	139
2022-09-15	11:21:12	3.17614	14.1281	13.4197	2964.07	1	140
2022-09-15	11:21:13	3.30011	14.6795	13.6221	2984.52	1	141
2022-09-15	11:21:13	1.54597	6.87678	13.6221	2970.95	FALSE	141
2022-09-15	11:21:13	2.29304	10.1999	13.6221	2994.72	FALSE	141
2022-09-15	11:21:13	5.11044	22.7323	13.6221	2993.68	1	142
2022-09-15	11:21:14	1.46683	6.52475	10.8709	3001.24	FALSE	142
2022-09-15	11:21:14	2.23859	9.9577	10.8709	3003.64	FALSE	142
2022-09-15	11:21:14	3.62622	16.1302	10.8709	3017.37	1	143
2022-09-15	11:21:15	2.82276	12.5562	9.81891	3016.2	FALSE	143
2022-09-15	11:21:15	2.39884	10.6705	9.81891	3028.04	FALSE	143
2022-09-15	11:21:15	0.520471	2.31516	9.81891	3018.51	FALSE	143
2022-09-15	11:21:15	3.08749	13.7338	9.81891	3041.78	1	144
2022-09-15	11:21:16	0.710954	3.16247	5.5229	3021.67	FALSE	144
2022-09-15	11:21:16	0.850191	3.78182	5.5229	3045.56	FALSE	144
2022-09-15	11:21:16	2.24434	9.98327	5.5229	3031.66	FALSE	144
2022-09-15	11:21:16	1.16093	5.16405	5.5229	3050.72	FALSE	144
2022-09-15	11:21:17	0.273855	1.21816	0.364006	3032.88	FALSE	144
2022-09-15	11:21:17	0.159148	0.707922	0.364006	3051.43	FALSE	144
2022-09-15	11:21:17	0.104542	0.465024	0.364006	3033.34	FALSE	144
2022-09-15	11:21:17	-0.210216	-0.935083	0.364006	3051.43	FALSE	144
2022-09-15	11:21:18	-0.0261448	-0.116297	3.1602	3033.34	FALSE	144
2022-09-15	11:21:18	0.211921	0.942667	3.1602	3052.37	FALSE	144
2022-09-15	11:21:18	1.94556	8.65424	3.1602	3041.99	FALSE	144
2022-09-15	11:21:19	1.38128	6.14421	3.44611	3058.52	FALSE	144
2022-09-15	11:21:19	0.92444	4.11209	3.44611	3046.11	FALSE	144
2022-09-15	11:21:19	0.551107	2.45143	3.44611	3060.97	FALSE	144
2022-09-15	11:21:19	0.242049	1.07668	3.44611	3047.18	FALSE	144
2022-09-15	11:21:20	0.0453565	0.201755	0.47108	3061.17	FALSE	144
2022-09-15	11:21:20	0.0286135	0.127279	0.47108	3047.31	FALSE	144
2022-09-15	11:21:20	0.0550766	0.244992	0.47108	3061.41	FALSE	144
2022-09-15	11:21:20	0.294567	1.31029	0.47108	3048.62	FALSE	144
2022-09-15	11:21:21	0.467799	2.08086	1.81612	3063.5	FALSE	144
2022-09-15	11:21:21	0.549173	2.44283	1.81612	3051.06	FALSE	144
2022-09-15	11:21:21	0.307952	1.36983	1.81612	3064.87	FALSE	144
2022-09-15	11:21:21	0.308206	1.37096	1.81612	3052.43	FALSE	144
2022-09-15	11:21:22	0.174008	0.774022	1.22661	3065.64	FALSE	144
2022-09-15	11:21:22	0.312837	1.39156	1.22661	3053.83	FALSE	144
2022-09-15	11:21:22	0.34042	1.51426	1.22661	3067.15	FALSE	144
2022-09-15	11:21:23	0.237214	1.05518	1.55613	3054.88	FALSE	144
2022-09-15	11:21:23	0.424491	1.88822	1.55613	3069.04	FALSE	144
2022-09-15	11:21:23	0.447137	1.98895	1.55613	3056.87	FALSE	144
2022-09-15	11:21:23	0.290496	1.29218	1.55613	3070.33	FALSE	144
2022-09-15	11:21:24	0.324135	1.44182	1.05676	3058.31	FALSE	144
2022-09-15	11:21:24	0.18897	0.840576	1.05676	3071.17	FALSE	144
2022-09-15	11:21:24	0.34154	1.51924	1.05676	3059.83	FALSE	144
2022-09-15	11:21:24	0.0956364	0.42541	1.05676	3071.6	FALSE	144
2022-09-15	11:21:25	0.211565	0.941083	-0.124389	3060.77	FALSE	144
2022-09-15	11:21:25	0.0276974	0.123204	-0.124389	3071.72	FALSE	144
2022-09-15	11:21:25	-0.113269	-0.503843	-0.124389	3060.77	FALSE	144
2022-09-15	11:21:25	-0.237849	-1.058	-0.124389	3071.72	FALSE	144
2022-09-15	11:21:26	-0.144414	-0.642382	-0.847175	3060.77	FALSE	144
2022-09-15	11:21:26	-0.293524	-1.30565	-0.847175	3071.72	FALSE	144
2022-09-15	11:21:26	-0.133422	-0.593488	-0.847175	3060.77	FALSE	144
2022-09-15	11:21:27	-0.283244	-1.25993	-0.635593	3071.72	FALSE	144
2022-09-15	11:21:27	-0.176119	-0.783413	-0.635593	3060.77	FALSE	144
2022-09-15	11:21:27	-0.247468	-1.10079	-0.635593	3071.72	FALSE	144
2022-09-15	11:21:27	0.13528	0.601752	-0.635593	3061.37	FALSE	144
2022-09-15	11:21:28	0.156349	0.695472	0.907864	3072.42	FALSE	144
2022-09-15	11:21:28	0.40098	1.78364	0.907864	3063.16	FALSE	144
2022-09-15	11:21:28	0.00642519	0.0285805	0.907864	3072.45	FALSE	144
2022-09-15	11:21:28	0.252634	1.12377	0.907864	3064.28	FALSE	144
2022-09-15	11:21:29	0.250089	1.11245	1.17334	3073.56	FALSE	144
2022-09-15	11:21:29	0.296145	1.31731	1.17334	3065.6	FALSE	144
2022-09-15	11:21:29	0.243168	1.08166	1.17334	3074.64	FALSE	144
2022-09-15	11:21:29	0.265713	1.18194	1.17334	3066.78	FALSE	144
2022-09-15	11:21:30	0.298842	1.32931	1.66042	3075.97	FALSE	144
2022-09-15	11:21:30	0.46388	2.06343	1.66042	3068.84	FALSE	144
2022-09-15	11:21:30	0.357112	1.58851	1.66042	3077.56	FALSE	144
2022-09-15	11:21:31	0.399809	1.77843	1.03203	3070.62	FALSE	144
2022-09-15	11:21:31	0.176247	0.783982	1.03203	3078.34	FALSE	144
2022-09-15	11:21:31	0.184542	0.82088	1.03203	3071.44	FALSE	144
2022-09-15	11:21:31	0.167443	0.74482	1.03203	3079.09	FALSE	144
2022-09-15	11:21:32	0.159148	0.707922	0.788452	3072.15	FALSE	144
2022-09-15	11:21:32	0.177519	0.78964	0.788452	3079.88	FALSE	144
2022-09-15	11:21:32	0.184695	0.82156	0.788452	3072.97	FALSE	144
2022-09-15	11:21:32	0.187646	0.834687	0.788452	3080.71	FALSE	144
2022-09-15	11:21:33	0.225662	1.00379	1.07504	3073.98	FALSE	144
2022-09-15	11:21:33	0.306832	1.36485	1.07504	3082.08	FALSE	144
2022-09-15	11:21:33	0.182099	0.810013	1.07504	3074.79	FALSE	144
2022-09-15	11:21:33	0.252125	1.1215	1.07504	3083.2	FALSE	144
2022-09-15	11:21:34	0.213804	0.951043	0.783228	3075.74	FALSE	144
2022-09-15	11:21:34	0.30154	1.34131	0.783228	3084.54	FALSE	144
2022-09-15	11:21:34	0.0128883	0.0573297	0.783228	3075.8	FALSE	144
2022-09-15	11:21:35	0.173702	0.772661	0.430502	3085.31	FALSE	144
2022-09-15	11:21:35	0.180013	0.800734	0.430502	3076.6	FALSE	144
2022-09-15	11:21:35	0.116196	0.516863	0.430502	3085.83	FALSE	144
2022-09-15	11:21:35	-0.082786	-0.368249	0.430502	3076.6	FALSE	144
2022-09-15	11:21:36	0.314008	1.39677	2.50078	3087.23	FALSE	144
2022-09-15	11:21:36	0.625662	2.78307	2.50078	3079.38	FALSE	144
2022-09-15	11:21:36	0.916908	4.07859	2.50078	3091.3	FALSE	144
2022-09-15	11:21:36	0.392227	1.7447	2.50078	3081.12	FALSE	144
2022-09-15	11:21:37	0.168257	0.748441	0.489473	3092.05	FALSE	144
2022-09-15	11:21:37	0.124339	0.553085	0.489473	3081.68	FALSE	144
2022-09-15	11:21:37	0.183168	0.814768	0.489473	3092.87	FALSE	144
2022-09-15	11:21:37	-0.0356104	-0.158402	0.489473	3081.68	FALSE	144
2022-09-15	11:21:38	-0.130012	-0.578319	-0.598015	3092.87	FALSE	144
2022-09-15	11:21:38	-0.141412	-0.629029	-0.598015	3081.68	FALSE	144
2022-09-15	11:21:38	-0.131895	-0.586695	-0.598015	3092.87	FALSE	144
2022-09-15	11:21:39	-0.202481	-0.900676	-0.882226	3081.68	FALSE	144
2022-09-15	11:21:39	-0.286806	-1.27577	-0.882226	3092.87	FALSE	144
2022-09-15	11:21:39	-0.168537	-0.749686	-0.882226	3081.68	FALSE	144
2022-09-15	11:21:39	-0.135509	-0.602771	-0.882226	3092.87	FALSE	144
2022-09-15	11:21:40	-0.0362211	-0.161119	0.243803	3081.68	FALSE	144
2022-09-15	11:21:40	-0.0212593	-0.0945656	0.243803	3092.87	FALSE	144
2022-09-15	11:21:40	0.124848	0.555349	0.243803	3082.23	FALSE	144
2022-09-15	11:21:40	0.15187	0.675548	0.243803	3093.54	FALSE	144
2022-09-15	11:21:41	0.00703587	0.031297	-0.866039	3082.26	FALSE	144
2022-09-15	11:21:41	-0.160343	-0.713238	-0.866039	3093.54	FALSE	144
2022-09-15	11:21:41	-0.227824	-1.01341	-0.866039	3082.26	FALSE	144
2022-09-15	11:21:41	-0.397646	-1.76881	-0.866039	3093.54	FALSE	144
2022-09-15	11:21:42	-0.531539	-2.36439	-2.08324	3082.26	FALSE	144
2022-09-15	11:21:42	-0.39444	-1.75455	-2.08324	3093.54	FALSE	144
2022-09-15	11:21:42	-0.47902	-2.13078	-2.08324	3082.26	FALSE	144
2022-09-15	11:21:43	-0.343091	-1.52614	-1.42987	3093.54	FALSE	144
2022-09-15	11:21:43	-0.386653	-1.71991	-1.42987	3082.26	FALSE	144
2022-09-15	11:21:43	-0.261921	-1.16508	-1.42987	3093.54	FALSE	144
2022-09-15	11:21:43	-0.294135	-1.30837	-1.42987	3082.26	FALSE	144
2022-09-15	11:21:44	-0.206043	-0.91652	-0.849006	3093.54	FALSE	144
2022-09-15	11:21:44	-0.161412	-0.717993	-0.849006	3082.26	FALSE	144
2022-09-15	11:21:44	-0.27215	-1.21058	-0.849006	3093.54	FALSE	144
2022-09-15	11:21:44	-0.123855	-0.550932	-0.849006	3082.26	FALSE	144
2022-09-15	11:21:45	-0.206399	-0.918104	-0.439725	3093.54	FALSE	144
2022-09-15	11:21:45	0.0120231	0.0534812	-0.439725	3082.32	FALSE	144
2022-09-15	11:21:45	-0.194134	-0.863547	-0.439725	3093.54	FALSE	144
2022-09-15	11:21:45	-0.00690816	-0.0307289	-0.439725	3082.32	FALSE	144
2022-09-15	11:21:46	0.0456618	0.203113	0.535351	3093.75	FALSE	144
2022-09-15	11:21:46	0.158079	0.703167	0.535351	3083.02	FALSE	144
2022-09-15	11:21:46	0.157316	0.699773	0.535351	3094.45	FALSE	144
2022-09-15	11:21:47	0.733448	3.26252	5.45329	3086.28	FALSE	144
2022-09-15	11:21:47	1.13131	5.03229	5.45329	3099.48	FALSE	144
2022-09-15	11:21:47	1.55416	6.91321	5.45329	3093.2	FALSE	144
2022-09-15	11:21:47	1.4849	6.60513	5.45329	3106.08	FALSE	144
2022-09-15	11:21:48	0.642354	2.85732	4.47112	3096.05	FALSE	144
2022-09-15	11:21:48	0.946679	4.21102	4.47112	3110.29	FALSE	144
2022-09-15	11:21:48	0.773601	3.44113	4.47112	3099.49	FALSE	144
2022-09-15	11:21:48	1.65798	7.37503	4.47112	3117.67	FALSE	144
2022-09-15	11:21:49	2.68754	11.9547	7.15483	3111.45	FALSE	144
2022-09-15	11:21:49	1.42933	6.35795	7.15483	3124.03	FALSE	144
2022-09-15	11:21:49	0.708562	3.15183	7.15483	3114.6	FALSE	144
2022-09-15	11:21:50	0.203626	0.905769	0.287266	3124.93	FALSE	144
2022-09-15	11:21:50	0.0528883	0.235258	0.287266	3114.84	FALSE	144
2022-09-15	11:21:50	-0.0423789	-0.18851	0.287266	3124.93	FALSE	144
2022-09-15	11:21:50	0.044186	0.196548	0.287266	3115.03	FALSE	144
2022-09-15	11:21:51	-0.207061	-0.921049	-0.745384	3124.93	FALSE	144
2022-09-15	11:21:51	-0.130165	-0.579	-0.745384	3115.03	FALSE	144
2022-09-15	11:21:51	-0.193829	-0.86219	-0.745384	3124.93	FALSE	144
2022-09-15	11:21:51	-0.139224	-0.619296	-0.745384	3115.03	FALSE	144
2022-09-15	11:21:52	0.0956872	0.425636	14.3912	3125.36	FALSE	144
2022-09-15	11:21:52	2.41156	10.7271	14.3912	3125.76	FALSE	144
2022-09-15	11:21:52	5.831	25.9375	14.3912	3151.3	1	145
2022-09-15	11:21:52	4.60291	20.4747	14.3912	3146.23	1	146
2022-09-15	11:21:53	3.4907	15.5273	14.255	3166.82	1	147
2022-09-15	11:21:53	2.31243	10.2862	14.255	3156.52	FALSE	147
2022-09-15	11:21:53	3.81085	16.9514	14.255	3183.78	1	148
2022-09-15	11:21:54	1.05294	4.68369	3.63785	3161.2	FALSE	148
2022-09-15	11:21:54	1.06022	4.71607	3.63785	3188.49	FALSE	148
2022-09-15	11:21:54	0.620471	2.75998	3.63785	3163.96	FALSE	148
2022-09-15	11:21:54	0.537672	2.39167	3.63785	3190.88	FALSE	148
2022-09-15	11:21:55	0.100573	0.447369	4.01566	3164.41	FALSE	148
2022-09-15	11:21:55	0.0572649	0.254726	4.01566	3191.14	FALSE	148
2022-09-15	11:21:55	0.922659	4.10417	4.01566	3168.52	FALSE	148
2022-09-15	11:21:55	2.53055	11.2564	4.01566	3202.39	FALSE	148
2022-09-15	11:21:56	7.15212	31.8141	37.772	3200.33	1	149
2022-09-15	11:21:56	8.96632	39.884	37.772	3242.28	1	150
2022-09-15	11:21:56	10.8116	48.0922	37.772	3248.42	1	151
2022-09-15	11:21:56	7.03604	31.2977	37.772	3273.58	1	152
2022-09-15	11:21:57	6.30479	28.045	29.1299	3276.47	1	153
2022-09-15	11:21:57	6.69395	29.776	29.1299	3303.35	1	154
2022-09-15	11:21:57	6.64734	29.5687	29.1299	3306.04	1	155
2022-09-15	11:21:58	10.8092	48.0815	45.8309	3351.43	1	156
2022-09-15	11:21:58	6.15512	27.3792	45.8309	3333.41	1	157
2022-09-15	11:21:58	13.1709	58.5868	45.8309	3410.02	1	158
2022-09-15	11:21:58	11.0778	49.2763	45.8309	3382.69	1	159
2022-09-15	11:21:59	9.49461	42.2339	37.8045	3452.25	1	160
2022-09-15	11:21:59	10.0837	44.8543	37.8045	3427.55	1	161
2022-09-15	11:21:59	6.12383	27.24	37.8045	3479.49	1	162
2022-09-15	11:21:59	8.29314	36.8895	37.8045	3464.43	1	163
2022-09-15	11:22:00	5.85823	26.0586	36.1501	3505.55	1	164
2022-09-15	11:22:00	10.6294	47.2817	36.1501	3511.72	1	165
2022-09-15	11:22:00	6.79512	30.2261	36.1501	3535.78	1	166
2022-09-15	11:22:00	9.2249	41.0342	36.1501	3552.75	1	167
2022-09-15	11:22:01	13.1972	58.7038	47.4992	3594.48	1	168
2022-09-15	11:22:01	6.78428	30.1778	47.4992	3582.93	1	169
2022-09-15	11:22:01	12.0534	53.6159	47.4992	3648.1	1	170
2022-09-15	11:22:02	10.6061	47.1781	45.7466	3630.11	1	171
2022-09-15	11:22:02	12.5123	55.6572	45.7466	3703.76	1	172
2022-09-15	11:22:02	8.23736	36.6414	45.7466	3666.75	1	173
2022-09-15	11:22:02	9.78138	43.5095	45.7466	3747.27	1	174
2022-09-15	11:22:03	14.1764	63.0595	23.8781	3729.81	1	175
2022-09-15	11:22:03	2.80154	12.4618	23.8781	3759.73	FALSE	175
2022-09-15	11:22:03	3.37757	15.0241	23.8781	3744.83	1	176
2022-09-15	11:22:03	1.11665	4.96708	23.8781	3764.69	FALSE	176
2022-09-15	11:22:04	1.96556	8.7432	22.0464	3753.57	FALSE	176
2022-09-15	11:22:04	1.93497	8.60713	22.0464	3773.3	FALSE	176
2022-09-15	11:22:04	6.56011	29.1807	22.0464	3782.76	1	177
2022-09-15	11:22:04	9.36433	41.6544	22.0464	3814.96	1	178
2022-09-15	11:22:05	6.43767	28.636	14.0023	3811.39	1	179
2022-09-15	11:22:05	2.62352	11.6699	14.0023	3826.63	FALSE	179
2022-09-15	11:22:05	0.382354	1.70079	14.0023	3813.09	FALSE	179
2022-09-15	11:22:06	0.44958	1.99982	9.20557	3828.63	FALSE	179
2022-09-15	11:22:06	0.660369	2.93745	9.20557	3816.03	FALSE	179
2022-09-15	11:22:06	1.18424	5.26774	9.20557	3833.89	FALSE	179
2022-09-15	11:22:06	5.98383	26.6173	9.20557	3842.65	1	180
2022-09-15	11:22:07	3.642	16.2003	14.4394	3850.09	1	181
2022-09-15	11:22:07	2.95645	13.1509	14.4394	3855.8	FALSE	181
2022-09-15	11:22:07	3.26617	14.5286	14.4394	3864.62	1	182
2022-09-15	11:22:07	3.11986	13.8778	14.4394	3869.68	1	183
2022-09-15	11:22:08	3.11803	13.8696	13.1899	3878.49	1	184
2022-09-15	11:22:08	2.63161	11.7059	13.1899	3881.38	FALSE	184
2022-09-15	11:22:08	3.56032	15.837	13.1899	3894.33	1	185
2022-09-15	11:22:08	2.5509	11.3469	13.1899	3892.73	FALSE	185
2022-09-15	11:22:09	3.07548	13.6804	18.7147	3908.01	1	186
2022-09-15	11:22:09	3.47843	15.4728	18.7147	3908.2	1	187
2022-09-15	11:22:09	6.06785	26.991	18.7147	3935	1	188
2022-09-15	11:22:10	6.42632	28.5856	46.4933	3936.79	1	189
2022-09-15	11:22:10	14.6391	65.1176	46.4933	4000.12	1	190
2022-09-15	11:22:10	9.32611	41.4844	46.4933	3978.27	1	191
2022-09-15	11:22:10	11.4171	50.7855	46.4933	4050.9	1	192
2022-09-15	11:22:11	5.75578	25.6029	32.2717	4003.87	1	193
2022-09-15	11:22:11	7.03136	31.2769	32.2717	4082.18	1	194
2022-09-15	11:22:11	8.72571	38.8137	32.2717	4042.69	1	195
2022-09-15	11:22:11	7.50718	33.3934	32.2717	4115.57	1	196
2022-09-15	11:22:12	10.589	47.102	41.495	4089.79	1	197
2022-09-15	11:22:12	8.82713	39.2648	41.495	4154.84	1	198
2022-09-15	11:22:12	10.0691	44.7894	41.495	4134.58	1	199
2022-09-15	11:22:12	7.82871	34.8237	41.495	4189.66	1	200
2022-09-15	11:22:13	15.2034	67.6278	60.6847	4202.21	1	201
2022-09-15	11:22:13	13.7807	61.2993	60.6847	4250.96	1	202
2022-09-15	11:22:13	11.9435	53.1271	60.6847	4255.33	1	203
2022-09-15	11:22:14	11.0305	49.0659	28.2915	4300.03	1	204
2022-09-15	11:22:14	5.24683	23.3389	28.2915	4278.67	1	205
2022-09-15	11:22:14	7.36831	32.7757	28.2915	4332.8	1	206
2022-09-15	11:22:14	1.79518	7.98532	28.2915	4286.66	FALSE	206
2022-09-15	11:22:15	0.147138	0.654499	-0.0553458	4333.46	FALSE	206
2022-09-15	11:22:15	-0.040445	-0.179907	-0.0553458	4286.66	FALSE	206
2022-09-15	11:22:15	-0.0426842	-0.189868	-0.0553458	4333.46	FALSE	206
2022-09-15	11:22:15	-0.113778	-0.506107	-0.0553458	4286.66	FALSE	206
2022-09-15	11:22:16	0.145051	0.645216	0.0741376	4334.1	FALSE	206
2022-09-15	11:22:16	0.00179415	0.00798074	0.0741376	4286.67	FALSE	206
2022-09-15	11:22:16	0.00647607	0.0288069	0.0741376	4334.13	FALSE	206
2022-09-15	11:22:16	-0.0866537	-0.385453	0.0741376	4286.67	FALSE	206
2022-09-15	11:22:17	-0.0399361	-0.177644	0.0536322	4334.13	FALSE	206
2022-09-15	11:22:17	0.0434735	0.193379	0.0536322	4286.86	FALSE	206
2022-09-15	11:22:17	0.0326338	0.145162	0.0536322	4334.28	FALSE	206
2022-09-15	11:22:18	0.288054	1.28132	1.46972	4288.14	FALSE	206
2022-09-15	11:22:18	0.42383	1.88528	1.46972	4336.16	FALSE	206
2022-09-15	11:22:18	0.375026	1.66819	1.46972	4289.81	FALSE	206
2022-09-15	11:22:18	0.23472	1.04408	1.46972	4337.21	FALSE	206
2022-09-15	11:22:19	0.191769	0.853027	0.648235	4290.66	FALSE	206
2022-09-15	11:22:19	-0.0039056	-0.0173729	0.648235	4337.21	FALSE	206
2022-09-15	11:22:19	0.249326	1.10905	0.648235	4291.77	FALSE	206
2022-09-15	11:22:20	0.0801656	0.356593	0.984909	4337.56	FALSE	206
2022-09-15	11:22:20	0.0562979	0.250424	0.984909	4292.02	FALSE	206
2022-09-15	11:22:20	0.151565	0.674191	0.984909	4338.24	FALSE	206
2022-09-15	11:22:20	0.308919	1.37413	0.984909	4293.4	FALSE	206
2022-09-15	11:22:20	0.51014	2.2692	0.984909	4340.51	FALSE	206
2022-09-15	11:22:21	0.709173	3.15454	1.27958	4296.55	FALSE	206
2022-09-15	11:22:21	0.10383	0.461857	1.27958	4340.97	FALSE	206
2022-09-15	11:22:21	0.0499875	0.222354	1.27958	4296.77	FALSE	206
2022-09-15	11:22:22	0.336908	1.49863	0.845837	4342.47	FALSE	206
2022-09-15	11:22:22	0.180267	0.801864	0.845837	4297.57	FALSE	206
2022-09-15	11:22:22	0.18042	0.802544	0.845837	4343.27	FALSE	206
2022-09-15	11:22:22	0.0630155	0.280306	0.845837	4297.85	FALSE	206
2022-09-15	11:22:23	0.132328	0.588621	0.50662	4343.86	FALSE	206
2022-09-15	11:22:23	0.144491	0.642725	0.50662	4298.5	FALSE	206
2022-09-15	11:22:23	0.0876465	0.389869	0.50662	4344.25	FALSE	206
2022-09-15	11:22:23	0.0911071	0.405263	0.50662	4298.9	FALSE	206
2022-09-15	11:22:24	0.0296822	0.132032	-0.111204	4344.38	FALSE	206
2022-09-15	11:22:24	-0.0122516	-0.0544976	-0.111204	4298.9	FALSE	206
2022-09-15	11:22:24	-0.0391728	-0.174248	-0.111204	4344.38	FALSE	206
2022-09-15	11:22:24	-0.0782567	-0.348101	-0.111204	4298.9	FALSE	206
2022-09-15	11:22:25	-0.0620735	-0.276115	-0.135765	4344.38	FALSE	206
2022-09-15	11:22:25	-0.103346	-0.459704	-0.135765	4298.9	FALSE	206
2022-09-15	11:22:25	0.0738552	0.328523	-0.135765	4344.71	FALSE	206
2022-09-15	11:22:26	0.0257636	0.114602	0.412563	4299.02	FALSE	206
2022-09-15	11:22:26	0.175687	0.781491	0.412563	4345.49	FALSE	206
2022-09-15	11:22:26	0.0500893	0.222807	0.412563	4299.24	FALSE	206
2022-09-15	11:22:26	0.119453	0.531351	0.412563	4346.02	FALSE	206
2022-09-15	11:22:27	0.152278	0.677363	0.497509	4299.92	FALSE	206
2022-09-15	11:22:27	0.14556	0.64748	0.497509	4346.67	FALSE	206
2022-09-15	11:22:27	0.149122	0.663324	0.497509	4300.58	FALSE	206
2022-09-15	11:22:27	0.0004201	0.00186869	0.497509	4346.67	FALSE	206
2022-09-15	11:22:28	0.201641	0.896939	0.829709	4301.48	FALSE	206
2022-09-15	11:22:28	0.0918704	0.408658	0.829709	4347.08	FALSE	206
2022-09-15	11:22:28	0.227036	1.0099	0.829709	4302.49	FALSE	206
2022-09-15	11:22:28	0.22556	1.00334	0.829709	4348.08	FALSE	206
2022-09-15	11:22:29	3.78083	16.8179	30.1746	4319.31	1	207
2022-09-15	11:22:29	8.08958	35.9841	30.1746	4384.07	1	208
2022-09-15	11:22:29	8.48026	37.7219	30.1746	4357.03	1	209
2022-09-15	11:22:30	3.95808	17.6063	17.1997	4401.67	1	210
2022-09-15	11:22:30	4.97283	22.1201	17.1997	4379.15	1	211
2022-09-15	11:22:30	1.95548	8.69837	17.1997	4410.37	FALSE	211
2022-09-15	11:22:30	4.58027	20.374	17.1997	4399.52	1	212
2022-09-15	11:22:31	1.83304	8.15373	13.6343	4418.52	FALSE	212
2022-09-15	11:22:31	3.67528	16.3484	13.6343	4415.87	1	213
2022-09-15	11:22:31	2.63558	11.7236	13.6343	4430.25	FALSE	213
2022-09-15	11:22:31	4.11665	18.3117	13.6343	4434.18	1	214
2022-09-15	11:22:32	3.83584	17.0626	13.3764	4447.31	1	215
2022-09-15	11:22:32	1.98663	8.83693	13.3764	4443.02	FALSE	215
2022-09-15	11:22:32	3.61055	16.0604	13.3764	4463.37	1	216
2022-09-15	11:22:32	2.59558	11.5457	13.3764	4454.56	FALSE	216
2022-09-15	11:22:33	5.20861	23.1689	25.8284	4486.54	1	217
2022-09-15	11:22:33	5.30423	23.5943	25.8284	4478.16	1	218
2022-09-15	11:22:33	6.90663	30.7221	25.8284	4517.26	1	219
2022-09-15	11:22:34	2.03187	9.03816	13.895	4487.2	FALSE	219
2022-09-15	11:22:34	4.78011	21.2629	13.895	4538.53	1	220
2022-09-15	11:22:34	3.2649	14.5229	13.895	4501.72	1	221
2022-09-15	11:22:34	2.41803	10.7559	13.895	4549.28	FALSE	221
2022-09-15	11:22:35	2.44113	10.8586	11.6453	4512.58	FALSE	221
2022-09-15	11:22:35	1.39513	6.20582	11.6453	4555.49	FALSE	221
2022-09-15	11:22:35	3.49945	15.5663	11.6453	4528.14	1	222
2022-09-15	11:22:35	3.13625	13.9507	11.6453	4569.44	1	223
2022-09-15	11:22:36	3.41813	15.2045	21.2757	4543.35	1	224
2022-09-15	11:22:36	3.64098	16.1958	21.2757	4585.63	1	225
2022-09-15	11:22:36	7.08006	31.4935	21.2757	4574.84	1	226
2022-09-15	11:22:36	4.99278	22.2089	21.2757	4607.84	1	227
2022-09-15	11:22:37	5.55833	24.7246	25.5325	4599.57	1	228
2022-09-15	11:22:37	3.87818	17.2509	25.5325	4625.09	1	229
2022-09-15	11:22:37	7.78337	34.622	25.5325	4634.19	1	230
2022-09-15	11:22:38	3.67752	16.3583	24.9078	4641.45	1	231
2022-09-15	11:22:38	5.6166	24.9838	24.9078	4659.17	1	232
2022-09-15	11:22:38	3.23396	14.3853	24.9078	4655.84	1	233
2022-09-15	11:22:38	9.87003	43.9039	24.9078	4703.08	1	234
2022-09-15	11:22:39	4.05334	18.0301	23.9136	4673.87	1	235
2022-09-15	11:22:39	6.58006	29.2694	23.9136	4732.35	1	236
2022-09-15	11:22:39	3.37217	15.0001	23.9136	4688.87	1	237
2022-09-15	11:22:39	7.49848	33.3547	23.9136	4765.7	1	238
2022-09-15	11:22:40	3.54978	15.7901	11.9521	4704.66	1	239
2022-09-15	11:22:40	4.05289	18.0281	11.9521	4783.73	1	240
2022-09-15	11:22:40	0.930649	4.13971	11.9521	4708.8	FALSE	240
2022-09-15	11:22:40	2.21452	9.85063	11.9521	4793.58	FALSE	240
2022-09-15	11:22:41	0.563524	2.50667	4.03309	4711.3	FALSE	240
2022-09-15	11:22:41	1.59574	7.09817	4.03309	4800.68	FALSE	240
2022-09-15	11:22:41	0.560776	2.49444	4.03309	4713.8	FALSE	240
2022-09-15	11:22:42	1.41721	6.30403	4.36845	4806.98	FALSE	240
2022-09-15	11:22:42	1.42749	6.34976	4.36845	4720.15	FALSE	240
2022-09-15	11:22:42	0.208359	0.926823	4.36845	4807.91	FALSE	240
2022-09-15	11:22:42	0.875229	3.89319	4.36845	4724.04	FALSE	240
2022-09-15	11:22:43	-0.216475	-0.962924	2.18477	4807.91	FALSE	240
2022-09-15	11:22:43	0.669326	2.9773	2.18477	4727.02	FALSE	240
2022-09-15	11:22:43	1.68917	7.51377	2.18477	4815.42	FALSE	240
2022-09-15	11:22:43	-0.177392	-0.789075	2.18477	4727.02	FALSE	240
2022-09-15	11:22:44	1.84337	8.19968	15.8893	4823.62	FALSE	240
2022-09-15	11:22:44	4.92062	21.8879	15.8893	4748.91	1	241
2022-09-15	11:22:44	4.87691	21.6935	15.8893	4845.32	1	242
2022-09-15	11:22:44	2.64744	11.7763	15.8893	4760.68	FALSE	242
2022-09-15	11:22:45	1.89935	8.44869	16.773	4853.76	FALSE	242
2022-09-15	11:22:45	5.02642	22.3585	16.773	4783.04	1	243
2022-09-15	11:22:45	4.38647	19.5119	16.773	4873.28	1	244
2022-09-15	11:22:46	6.29054	27.9816	25.4275	4811.02	1	245
2022-09-15	11:22:46	3.39365	15.0956	25.4275	4888.37	1	246
2022-09-15	11:22:46	6.81293	30.3053	25.4275	4841.33	1	247
2022-09-15	11:22:46	6.3683	28.3275	25.4275	4916.7	1	248
2022-09-15	11:22:47	4.08189	18.1571	10.9036	4859.48	1	249
2022-09-15	11:22:47	1.96169	8.72599	10.9036	4925.43	FALSE	249
2022-09-15	11:22:47	2.41457	10.7405	10.9036	4870.23	FALSE	249
2022-09-15	11:22:47	1.34683	5.99097	10.9036	4931.42	FALSE	249
2022-09-15	11:22:48	0.283779	1.26231	1.72812	4871.49	FALSE	249
2022-09-15	11:22:48	0.132125	0.587718	1.72812	4932	FALSE	249
2022-09-15	11:22:48	-0.0159667	-0.0710231	1.72812	4871.49	FALSE	249
2022-09-15	11:22:48	1.15406	5.13349	1.72812	4937.14	FALSE	249
2022-09-15	11:22:49	0.529478	2.35522	6.46832	4873.84	FALSE	249
2022-09-15	11:22:49	0.824695	3.66841	6.46832	4940.81	FALSE	249
2022-09-15	11:22:49	3.00826	13.3813	6.46832	4887.22	1	250
2022-09-15	11:22:50	4.21106	18.7316	20.1451	4959.54	1	251
2022-09-15	11:22:50	4.49446	19.9923	20.1451	4907.22	1	252
2022-09-15	11:22:50	4.04418	17.9893	20.1451	4977.53	1	253
2022-09-15	11:22:50	5.36555	23.867	20.1451	4931.08	1	254
2022-09-15	11:22:51	5.8136	25.8601	24.9898	5003.39	1	255
2022-09-15	11:22:51	5.32693	23.6953	24.9898	4954.78	1	256
2022-09-15	11:22:51	1.91523	8.51933	24.9898	5011.91	FALSE	256
2022-09-15	11:22:51	9.41604	41.8844	24.9898	4996.66	1	257
2022-09-15	11:22:52	6.39803	28.4597	15.9127	5040.37	1	258
2022-09-15	11:22:52	4.27161	19.001	15.9127	5015.66	1	259
2022-09-15	11:22:52	2.37513	10.5651	15.9127	5050.93	FALSE	259
2022-09-15	11:22:52	1.26454	5.62493	15.9127	5021.29	FALSE	259
2022-09-15	11:22:53	5.60281	24.9224	26.9435	5075.85	1	260
2022-09-15	11:22:53	4.69324	20.8765	26.9435	5042.17	1	261
2022-09-15	11:22:53	7.87543	35.0315	26.9435	5110.89	1	262
2022-09-15	11:22:54	3.39024	15.0805	27.1223	5057.25	1	263
2022-09-15	11:22:54	7.6652	34.0963	27.1223	5144.98	1	264
2022-09-15	11:22:54	7.38159	32.8348	27.1223	5090.08	1	265
2022-09-15	11:22:54	5.95243	26.4776	27.1223	5171.46	1	266
2022-09-15	11:22:55	7.12815	31.7074	29.3238	5121.79	1	267
2022-09-15	11:22:55	4.34423	19.324	29.3238	5190.78	1	268
2022-09-15	11:22:55	6.25304	27.8148	29.3238	5149.6	1	269
2022-09-15	11:22:55	8.64372	38.449	29.3238	5229.23	1	270
2022-09-15	11:22:56	6.46963	28.7782	38.6377	5178.38	1	271
2022-09-15	11:22:56	9.14846	40.6942	38.6377	5269.93	1	272
2022-09-15	11:22:56	11.1248	49.4853	38.6377	5227.87	1	273
2022-09-15	11:22:56	8.00164	35.5929	38.6377	5305.52	1	274
2022-09-15	11:22:57	16.3237	72.6111	63.134	5300.48	1	275
2022-09-15	11:22:57	15.0788	67.0735	63.134	5372.59	1	276
2022-09-15	11:22:57	11.177	49.7175	63.134	5350.2	1	277
2022-09-15	11:22:58	2.40098	10.68	68.7008	5383.27	FALSE	277
2022-09-15	11:22:58	12.122	53.9211	68.7008	5404.12	1	278
2022-09-15	11:22:58	22.6119	100.582	68.7008	5483.85	1	279
2022-09-15	11:22:58	24.6436	109.62	68.7008	5513.74	1	280
2022-09-15	11:22:59	7.76591	34.5443	33.4906	5518.4	1	281
2022-09-15	11:22:59	5.14367	22.8801	33.4906	5536.62	1	282
2022-09-15	11:22:59	9.56749	42.5581	33.4906	5560.96	1	283
2022-09-15	11:22:59	7.63899	33.9798	33.4906	5570.6	1	284
2022-09-15	11:23:00	4.34403	19.3231	32.062	5580.28	1	285
2022-09-15	11:23:00	5.32286	23.6771	32.062	5594.27	1	286
2022-09-15	11:23:00	6.60978	29.4016	32.062	5609.68	1	287
2022-09-15	11:23:00	12.5548	55.8463	32.062	5650.12	1	288
2022-09-15	11:23:01	13.9944	62.2499	64.2501	5671.93	1	289
2022-09-15	11:23:01	16.41	72.995	64.2501	5723.11	1	290
2022-09-15	11:23:01	12.9278	57.5054	64.2501	5729.44	1	291
2022-09-15	11:23:02	14.4307	64.1906	57.3098	5787.3	1	292
2022-09-15	11:23:02	13.181	58.6317	57.3098	5788.07	1	293
2022-09-15	11:23:02	11.8085	52.5266	57.3098	5839.83	1	294
2022-09-15	11:23:02	12.1151	53.8904	57.3098	5841.96	1	295
2022-09-15	11:23:03	15.2961	68.0401	61.9565	5907.87	1	296
2022-09-15	11:23:03	13.9436	62.0239	61.9565	5903.98	1	297
2022-09-15	11:23:03	14.3714	63.9269	61.9565	5971.8	1	298
2022-09-15	11:23:03	12.1027	53.8352	61.9565	5957.82	1	299
2022-09-15	11:23:04	6.9965	31.1218	47.1332	6002.92	1	300
2022-09-15	11:23:04	8.36337	37.2019	47.1332	5995.02	1	301
2022-09-15	11:23:04	11.4527	50.9439	47.1332	6053.86	1	302
2022-09-15	11:23:04	15.5715	69.2651	47.1332	6064.29	1	303
2022-09-15	11:23:05	13.3208	59.2536	77.4945	6113.12	1	304
2022-09-15	11:23:05	21.3901	95.1474	77.4945	6159.43	1	305
2022-09-15	11:23:05	17.5537	78.0824	77.4945	6191.2	1	306
2022-09-15	11:23:06	13.2111	58.7656	30.5828	6218.2	1	307
2022-09-15	11:23:06	2.90693	12.9306	30.5828	6204.13	FALSE	307
2022-09-15	11:23:06	5.89726	26.2322	30.5828	6244.43	1	308
2022-09-15	11:23:06	5.48601	24.4029	30.5828	6228.53	1	309
2022-09-15	11:23:07	6.04342	26.8823	60.828	6271.31	1	310
2022-09-15	11:23:07	14.802	65.8423	60.828	6294.38	1	311
2022-09-15	11:23:07	15.3319	68.1994	60.828	6339.51	1	312
2022-09-15	11:23:07	18.5217	82.3882	60.828	6376.76	1	313
2022-09-15	11:23:08	15.5666	69.2434	32.9877	6408.76	1	314
2022-09-15	11:23:08	9.22311	41.0262	32.9877	6417.79	1	315
2022-09-15	11:23:08	2.7823	12.3762	32.9877	6421.13	FALSE	315
2022-09-15	11:23:08	2.09187	9.30506	32.9877	6427.1	FALSE	315
2022-09-15	11:23:09	1.36912	6.09012	5.17001	6427.22	FALSE	315
2022-09-15	11:23:09	0.990598	4.40638	5.17001	6431.5	FALSE	315
2022-09-15	11:23:09	1.12709	5.01352	5.17001	6432.24	FALSE	315
2022-09-15	11:23:10	0.778181	3.4615	3.72624	6434.96	FALSE	315
2022-09-15	11:23:10	0.917875	4.08289	3.72624	6436.32	FALSE	315
2022-09-15	11:23:10	1.0594	4.71242	3.72624	6439.68	FALSE	315
2022-09-15	11:23:10	0.595331	2.64815	3.72624	6438.97	FALSE	315
2022-09-15	11:23:11	0.452634	2.01341	1.9275	6441.69	FALSE	315
2022-09-15	11:23:11	0.398181	1.77119	1.9275	6440.74	FALSE	315
2022-09-15	11:23:11	0.441132	1.96224	1.9275	6443.65	FALSE	315
2022-09-15	11:23:11	0.441336	1.96315	1.9275	6442.7	FALSE	315
2022-09-15	11:23:12	0.469835	2.08992	4.16834	6445.74	FALSE	315
2022-09-15	11:23:12	0.670038	2.98046	4.16834	6445.68	FALSE	315
2022-09-15	11:23:12	1.12052	4.9843	4.16834	6450.73	FALSE	315
2022-09-15	11:23:12	1.48795	6.6187	4.16834	6452.3	FALSE	315
2022-09-15	11:23:13	0.96271	4.28233	4.97162	6455.01	FALSE	315
2022-09-15	11:23:13	1.22296	5.43997	4.97162	6457.74	FALSE	315
2022-09-15	11:23:13	1.16734	5.19256	4.97162	6460.2	FALSE	315
2022-09-15	11:23:14	1.08139	4.81024	3.73253	6462.55	FALSE	315
2022-09-15	11:23:14	1.20037	5.33949	3.73253	6465.54	FALSE	315
2022-09-15	11:23:14	0.776145	3.45245	3.73253	6466	FALSE	315
2022-09-15	11:23:14	0.298537	1.32795	3.73253	6466.87	FALSE	315
2022-09-15	11:23:15	0.00459311	0.0204311	-0.787092	6466.02	FALSE	315
2022-09-15	11:23:15	-0.110369	-0.490943	-0.787092	6466.87	FALSE	315
2022-09-15	11:23:15	-0.209809	-0.933272	-0.787092	6466.02	FALSE	315
2022-09-15	11:23:15	-0.3922	-1.74458	-0.787092	6466.87	FALSE	315
2022-09-15	11:23:16	-0.32818	-1.45981	-2.60011	6466.02	FALSE	315
2022-09-15	11:23:16	-0.569249	-2.53213	-2.60011	6466.87	FALSE	315
2022-09-15	11:23:16	-1.26681	-5.63502	-2.60011	6466.02	FALSE	315
2022-09-15	11:23:16	-0.17388	-0.773453	-2.60011	6466.87	FALSE	315
2022-09-15	11:23:17	0.249529	1.10995	11.0656	6467.13	FALSE	315
2022-09-15	11:23:17	1.34693	5.99141	11.0656	6472.86	FALSE	315
2022-09-15	11:23:17	5.86652	26.0955	11.0656	6493.23	1	316
2022-09-15	11:23:18	12.9691	57.6892	51.0866	6530.55	1	317
2022-09-15	11:23:18	10.1021	44.9362	51.0866	6538.17	1	318
2022-09-15	11:23:18	13.1597	58.537	51.0866	6589.09	1	319
2022-09-15	11:23:18	9.7082	43.184	51.0866	6581.35	1	320
2022-09-15	11:23:19	19.7426	87.819	62.5922	6676.9	1	321
2022-09-15	11:23:19	19.8362	88.2354	62.5922	6669.58	1	322
2022-09-15	11:23:19	8.43217	37.508	62.5922	6714.41	1	323
2022-09-15	11:23:19	8.27441	36.8062	62.5922	6706.39	1	324
2022-09-15	11:23:20	0.834466	3.71187	16.8284	6718.12	FALSE	324
2022-09-15	11:23:20	3.15233	14.0222	16.8284	6720.41	1	325
2022-09-15	11:23:20	5.06464	22.5285	16.8284	6740.65	1	326
2022-09-15	11:23:20	6.08138	27.0512	16.8284	6747.46	1	327
2022-09-15	11:23:21	10.7255	47.7092	40.9148	6788.36	1	328
2022-09-15	11:23:21	8.94215	39.7765	40.9148	6787.24	1	329
2022-09-15	11:23:21	7.92652	35.2587	40.9148	6823.62	1	330
2022-09-15	11:23:22	9.84734	43.8029	27.4715	6831.04	1	331
2022-09-15	11:23:22	8.9026	39.6005	27.4715	6863.22	1	332
2022-09-15	11:23:22	3.89263	17.3152	27.4715	6848.36	1	333
2022-09-15	11:23:22	2.06088	9.16721	27.4715	6872.39	FALSE	333
2022-09-15	11:23:23	0.862812	3.83796	4.37542	6852.2	FALSE	333
2022-09-15	11:23:23	1.12057	4.98452	4.37542	6877.37	FALSE	333
2022-09-15	11:23:23	0.798639	3.55251	4.37542	6855.75	FALSE	333
2022-09-15	11:23:23	1.15253	5.12668	4.37542	6882.5	FALSE	333
2022-09-15	11:23:24	2.2221	9.88435	19.9687	6865.63	FALSE	333
2022-09-15	11:23:24	6.20652	27.6078	19.9687	6910.11	1	334
2022-09-15	11:23:24	6.90332	30.7073	19.9687	6896.34	1	335
2022-09-15	11:23:24	2.62469	11.6751	19.9687	6921.78	FALSE	335
2022-09-15	11:23:25	1.81762	8.08514	6.58144	6904.43	FALSE	335
2022-09-15	11:23:25	1.29788	5.77323	6.58144	6927.56	FALSE	335
2022-09-15	11:23:25	1.32322	5.88595	6.58144	6910.31	FALSE	335
2022-09-15	11:23:26	1.0879	4.8392	9.15661	6932.4	FALSE	335
2022-09-15	11:23:26	2.25635	10.0367	9.15661	6920.35	FALSE	335
2022-09-15	11:23:26	1.82388	8.11298	9.15661	6940.51	FALSE	335
2022-09-15	11:23:26	3.06586	13.6376	9.15661	6933.99	1	336
2022-09-15	11:23:27	1.59207	7.08185	10.7713	6947.59	FALSE	336
2022-09-15	11:23:27	2.99843	13.3376	10.7713	6947.32	FALSE	336
2022-09-15	11:23:27	1.79391	7.97967	10.7713	6955.57	FALSE	336
2022-09-15	11:23:27	3.30159	14.6861	10.7713	6962.01	1	337
2022-09-15	11:23:28	3.44347	15.3172	13.25	6970.89	1	338
2022-09-15	11:23:28	3.53523	15.7254	13.25	6977.74	1	339
2022-09-15	11:23:28	1.95752	8.70744	13.25	6979.59	FALSE	339
2022-09-15	11:23:29	1.29192	5.74672	3.04294	6983.48	FALSE	339
2022-09-15	11:23:29	0.603473	2.68437	3.04294	6982.28	FALSE	339
2022-09-15	11:23:29	0.451565	2.00865	3.04294	6985.49	FALSE	339
2022-09-15	11:23:29	0.389377	1.73203	3.04294	6984.01	FALSE	339
2022-09-15	11:23:30	0.445662	1.98239	3.46547	6987.47	FALSE	339
2022-09-15	11:23:30	0.931361	4.14288	3.46547	6988.15	FALSE	339
2022-09-15	11:23:30	0.685204	3.04792	3.46547	6990.52	FALSE	339
2022-09-15	11:23:30	1.05406	4.68867	3.46547	6992.84	FALSE	339
2022-09-15	11:23:31	1.02729	4.56959	8.78497	6995.09	FALSE	339
2022-09-15	11:23:31	1.62368	7.22245	8.78497	7000.06	FALSE	339
2022-09-15	11:23:31	1.68139	7.47916	8.78497	7002.57	FALSE	339
2022-09-15	11:23:31	3.56744	15.8687	8.78497	7015.93	1	340
2022-09-15	11:23:32	1.74724	7.77207	5.48549	7010.34	FALSE	340
2022-09-15	11:23:32	1.71411	7.6247	5.48549	7023.56	FALSE	340
2022-09-15	11:23:32	0.860776	3.8289	5.48549	7014.17	FALSE	340
2022-09-15	11:23:32	0.610649	2.71629	5.48549	7026.27	FALSE	340
2022-09-15	11:23:33	0.146934	0.653592	1.84702	7014.82	FALSE	340
2022-09-15	11:23:33	0.525916	2.33938	1.84702	7028.61	FALSE	340
2022-09-15	11:23:33	0.572837	2.54809	1.84702	7017.37	FALSE	340
2022-09-15	11:23:34	0.721946	3.21136	1.43452	7031.83	FALSE	340
2022-09-15	11:23:34	0.656908	2.92206	1.43452	7020.29	FALSE	340
2022-09-15	11:23:34	0.0769595	0.342331	1.43452	7032.17	FALSE	340
2022-09-15	11:23:34	-0.165839	-0.737685	1.43452	7020.29	FALSE	340
2022-09-15	11:23:35	-0.135152	-0.601183	0.329711	7032.17	FALSE	340
2022-09-15	11:23:35	-0.208995	-0.929652	0.329711	7020.29	FALSE	340
2022-09-15	11:23:35	0.343982	1.5301	0.329711	7033.7	FALSE	340
2022-09-15	11:23:35	0.296654	1.31958	0.329711	7021.61	FALSE	340
2022-09-15	11:23:36	-0.0359667	-0.159987	1.15433	7033.7	FALSE	340
2022-09-15	11:23:36	-0.325381	-1.44736	1.15433	7021.61	FALSE	340
2022-09-15	11:23:36	1.13986	5.07033	1.15433	7038.77	FALSE	340
2022-09-15	11:23:37	0.697723	3.10361	2.99999	7024.72	FALSE	340
2022-09-15	11:23:37	0.811463	3.60955	2.99999	7042.38	FALSE	340
2022-09-15	11:23:37	0.593244	2.63887	2.99999	7027.36	FALSE	340
2022-09-15	11:23:37	0.59528	2.64792	2.99999	7045.03	FALSE	340

## Sheet: Tyr_star_2022915111828 (3)
Date	Time	Lbs	Newtons	Total force x time		Total steps > 13.345	**GoPro Fitting: 1108
2022-09-15	11:18:37	0.274618	1.22156	1.22156	FALSE	0
2022-09-15	11:18:37	0.285865	1.27158	1.27158	FALSE	0
2022-09-15	11:18:37	0.248003	1.10317	2.32472	FALSE	0
2022-09-15	11:18:37	0.268155	1.19281	2.46439	FALSE	0
2022-09-15	11:18:38	0.326221	1.4511	3.77582	FALSE	0
2022-09-15	11:18:38	0.296349	1.31822	3.78261	FALSE	0
2022-09-15	11:18:38	0.311972	1.38771	5.16353	FALSE	0
2022-09-15	11:18:39	0.292532	1.30124	5.08385	FALSE	0
2022-09-15	11:18:39	0.304746	1.35557	6.5191	FALSE	0
2022-09-15	11:18:39	0.305407	1.35851	6.44236	FALSE	0
2022-09-15	11:18:39	0.281896	1.25393	7.77303	FALSE	0
2022-09-15	11:18:40	0.30154	1.34131	7.78367	FALSE	0
2022-09-15	11:18:40	0.330445	1.46989	9.24292	FALSE	0
2022-09-15	11:18:40	0.261031	1.16112	8.94479	FALSE	0
2022-09-15	11:18:40	0.3193	1.42031	10.6632	FALSE	0
2022-09-15	11:18:41	0.390445	1.73678	10.6816	FALSE	0
2022-09-15	11:18:41	0.461692	2.0537	12.7169	FALSE	0
2022-09-15	11:18:41	1.12261	4.99359	15.6752	FALSE	0
2022-09-15	11:18:41	1.10541	4.91708	17.634	FALSE	0
2022-09-15	11:18:42	1.62312	7.21996	22.8951	FALSE	0
2022-09-15	11:18:42	0.833651	3.70825	21.3423	FALSE	0
2022-09-15	11:18:42	0.489326	2.17662	25.0717	FALSE	0
2022-09-15	11:18:43	0.34098	1.51675	22.859	FALSE	0
2022-09-15	11:18:43	0.672023	2.98929	28.061	FALSE	0
2022-09-15	11:18:43	0.669326	2.9773	25.8363	FALSE	0
2022-09-15	11:18:43	0.653906	2.9087	30.9697	FALSE	0
2022-09-15	11:18:44	1.09182	4.85663	30.6929	FALSE	0
2022-09-15	11:18:44	1.94413	8.64788	39.6176	FALSE	0
2022-09-15	11:18:44	1.69447	7.53734	38.2303	FALSE	0
2022-09-15	11:18:44	1.14958	5.11356	44.7312	FALSE	0
2022-09-15	11:18:45	1.43757	6.3946	44.6249	FALSE	0
2022-09-15	11:18:45	1.15457	5.13576	49.8669	FALSE	0
2022-09-15	11:18:45	2.93523	13.0565	57.6814	FALSE	0
2022-09-15	11:18:45	2.86118	12.7271	62.594	FALSE	0
2022-09-15	11:18:46	1.18581	5.27472	62.9561	FALSE	0
2022-09-15	11:18:46	1.07436	4.77897	67.373	FALSE	0
2022-09-15	11:18:46	1.8108	8.0548	71.0109	FALSE	0
2022-09-15	11:18:47	4.13151	18.3778	85.7508	1	1
2022-09-15	11:18:47	5.27711	23.4736	94.4845	1	2
2022-09-15	11:18:47	7.32113	32.5659	118.317	1	3
2022-09-15	11:18:47	4.45411	19.8128	114.297	1	4
2022-09-15	11:18:48	2.74658	12.2173	130.534	FALSE	4
2022-09-15	11:18:48	4.9139	21.858	136.155	1	5
2022-09-15	11:18:48	2.82296	12.5571	143.091	FALSE	5
2022-09-15	11:18:48	3.44688	15.3324	151.488	1	6
2022-09-15	11:18:49	2.66469	11.8531	154.944	FALSE	6
2022-09-15	11:18:49	3.45594	15.3727	166.86	1	7
2022-09-15	11:18:49	8.77721	39.0428	193.987	1	8
2022-09-15	11:18:49	6.06037	26.9577	193.818	1	9
2022-09-15	11:18:50	12.9147	57.4472	251.434	1	10
2022-09-15	11:18:50	7.26937	32.3356	226.154	1	11
2022-09-15	11:18:50	2.27966	10.1404	261.574	FALSE	11
2022-09-15	11:18:51	3.29441	14.6542	240.808	1	12
2022-09-15	11:18:51	2.73925	12.1847	273.759	FALSE	12
2022-09-15	11:18:51	4.12586	18.3527	259.161	1	13
2022-09-15	11:18:51	3.04958	13.5651	287.324	1	14
2022-09-15	11:18:52	5.00515	22.2639	281.425	1	15
2022-09-15	11:18:52	6.93914	30.8667	318.191	1	16
2022-09-15	11:18:52	1.93986	8.62889	290.053	FALSE	16
2022-09-15	11:18:52	1.51075	6.72012	324.911	FALSE	16
2022-09-15	11:18:53	1.3277	5.90588	295.959	FALSE	16
2022-09-15	11:18:53	0.61528	2.73689	327.648	FALSE	16
2022-09-15	11:18:53	0.409377	1.82099	297.78	FALSE	16
2022-09-15	11:18:53	0.521692	2.32059	329.969	FALSE	16
2022-09-15	11:18:54	0.536043	2.38443	300.165	FALSE	16
2022-09-15	11:18:54	0.231921	1.03163	331	FALSE	16
2022-09-15	11:18:54	2.02836	9.02255	309.187	FALSE	16
2022-09-15	11:18:55	6.56322	29.1945	360.195	1	17
2022-09-15	11:18:55	5.16317	22.9668	332.154	1	18
2022-09-15	11:18:55	4.6934	20.8772	381.072	1	19
2022-09-15	11:18:55	3.54617	15.7741	347.928	1	20
2022-09-15	11:18:56	8.06505	35.875	416.947	1	21
2022-09-15	11:18:56	5.95273	26.4789	374.407	1	22
2022-09-15	11:18:56	10.1897	45.3258	462.273	1	23
2022-09-15	11:18:56	17.802	79.1869	453.594	1	24
2022-09-15	11:18:57	7.47853	33.266	495.539	1	25
2022-09-15	11:18:57	16.571	73.7111	527.305	1	26
2022-09-15	11:18:57	11.7821	52.4091	547.948	1	27
2022-09-15	11:18:57	15.062	66.9988	594.304	1	28
2022-09-15	11:18:58	23.5241	104.64	652.588	1	29
2022-09-15	11:18:58	8.34449	37.118	631.422	1	30
2022-09-15	11:18:58	9.23075	41.0602	693.648	1	31
2022-09-15	11:18:59	3.69146	16.4204	647.842	1	32
2022-09-15	11:18:59	1.71726	7.63872	701.287	FALSE	32
2022-09-15	11:18:59	0.632888	2.81521	650.657	FALSE	32
2022-09-15	11:18:59	0.295484	1.31437	702.601	FALSE	32
2022-09-15	11:19:00	0.567392	2.52387	653.181	FALSE	32
2022-09-15	11:19:00	0.173092	0.769948	703.371	FALSE	32
2022-09-15	11:19:00	0.398181	1.77119	654.952	FALSE	32
2022-09-15	11:19:00	0.317366	1.41171	704.783	FALSE	32
2022-09-15	11:19:01	0.393499	1.75036	656.703	FALSE	32
2022-09-15	11:19:01	0.275891	1.22722	706.01	FALSE	32
2022-09-15	11:19:01	0.377672	1.67996	658.383	FALSE	32
2022-09-15	11:19:01	0.420318	1.86966	707.88	FALSE	32
2022-09-15	11:19:02	0.635127	2.82517	661.208	FALSE	32
2022-09-15	11:19:02	1.84948	8.22686	716.106	FALSE	32
2022-09-15	11:19:02	1.99314	8.86589	670.074	FALSE	32
2022-09-15	11:19:03	1.64337	7.31004	723.417	FALSE	32
2022-09-15	11:19:03	0.856094	3.80808	673.882	FALSE	32
2022-09-15	11:19:03	0.866628	3.85493	727.271	FALSE	32
2022-09-15	11:19:03	0.248512	1.10543	674.987	FALSE	32
2022-09-15	11:19:04	0.261641	1.16383	728.435	FALSE	32
2022-09-15	11:19:04	0.226221	1.00628	675.994	FALSE	32
2022-09-15	11:19:04	-0.0572898	-0.254836	728.435	FALSE	32
2022-09-15	11:19:04	0.0671885	0.298868	676.292	FALSE	32
2022-09-15	11:19:05	0.221896	0.987038	729.422	FALSE	32
2022-09-15	11:19:05	0.612888	2.72625	679.019	FALSE	32
2022-09-15	11:19:05	0.894822	3.98035	733.403	FALSE	32
2022-09-15	11:19:06	0.849987	3.78091	682.8	FALSE	32
2022-09-15	11:19:06	0.866781	3.85562	737.258	FALSE	32
2022-09-15	11:19:06	1.4335	6.37649	689.176	FALSE	32
2022-09-15	11:19:06	0.561896	2.49943	739.758	FALSE	32
2022-09-15	11:19:07	0.270191	1.20186	690.378	FALSE	32
2022-09-15	11:19:07	0.15528	0.690716	740.448	FALSE	32
2022-09-15	11:19:07	0.0194023	0.0863053	690.464	FALSE	32
2022-09-15	11:19:07	0.230242	1.02416	741.473	FALSE	32
2022-09-15	11:19:08	0.32215	1.43299	691.897	FALSE	32
2022-09-15	11:19:08	1.40739	6.26035	747.733	FALSE	32
2022-09-15	11:19:08	2.33365	10.3805	702.278	FALSE	32
2022-09-15	11:19:08	3.51457	15.6335	763.366	1	33
2022-09-15	11:19:09	3.88591	17.2853	719.563	1	34
2022-09-15	11:19:09	1.9251	8.56323	771.93	FALSE	34
2022-09-15	11:19:09	1.96266	8.7303	728.293	FALSE	34
2022-09-15	11:19:10	1.72749	7.68422	779.614	FALSE	34
2022-09-15	11:19:10	3.29075	14.6379	742.931	1	35
2022-09-15	11:19:10	3.91299	17.4058	797.02	1	36
2022-09-15	11:19:10	9.72199	43.2454	786.177	1	37
2022-09-15	11:19:11	8.71268	38.7557	835.775	1	38
2022-09-15	11:19:11	3.81869	16.9863	803.163	1	39
2022-09-15	11:19:11	4.42408	19.6792	855.455	1	40
2022-09-15	11:19:11	5.63238	25.054	828.217	1	41
2022-09-15	11:19:12	6.92663	30.811	886.266	1	42
2022-09-15	11:19:12	3.85228	17.1357	845.353	1	43
2022-09-15	11:19:12	2.4394	10.8509	897.117	FALSE	43
2022-09-15	11:19:12	3.40627	15.1518	860.504	1	44
2022-09-15	11:19:13	1.70973	7.60522	904.722	FALSE	44
2022-09-15	11:19:13	1.33559	5.94097	866.445	FALSE	44
2022-09-15	11:19:13	0.629427	2.79982	907.522	FALSE	44
2022-09-15	11:19:14	0.778537	3.46309	869.908	FALSE	44
2022-09-15	11:19:14	0.465255	2.06955	909.591	FALSE	44
2022-09-15	11:19:14	0.669733	2.97911	872.888	FALSE	44
2022-09-15	11:19:14	0.72383	3.21974	912.811	FALSE	44
2022-09-15	11:19:15	1.27406	5.66727	878.555	FALSE	44
2022-09-15	11:19:15	0.68271	3.03683	915.848	FALSE	44
2022-09-15	11:19:15	1.07324	4.77399	883.329	FALSE	44
2022-09-15	11:19:15	0.357519	1.59032	917.438	FALSE	44
2022-09-15	11:19:16	0.48897	2.17504	885.504	FALSE	44
2022-09-15	11:19:16	0.360267	1.60254	919.041	FALSE	44
2022-09-15	11:19:16	0.356756	1.58692	887.091	FALSE	44
2022-09-15	11:19:16	0.324593	1.44385	920.484	FALSE	44
2022-09-15	11:19:17	0.333041	1.48143	888.572	FALSE	44
2022-09-15	11:19:17	0.521336	2.31901	922.803	FALSE	44
2022-09-15	11:19:17	0.527086	2.34458	890.917	FALSE	44
2022-09-15	11:19:18	0.588461	2.61759	925.421	FALSE	44
2022-09-15	11:19:18	1.52683	6.79165	897.708	FALSE	44
2022-09-15	11:19:18	2.29004	10.1866	935.608	FALSE	44
2022-09-15	11:19:18	3.7937	16.8751	914.584	1	45
2022-09-15	11:19:19	2.06724	9.1955	944.803	FALSE	45
2022-09-15	11:19:19	1.13854	5.06445	919.648	FALSE	45
2022-09-15	11:19:19	0.587443	2.61306	947.416	FALSE	45
2022-09-15	11:19:19	0.60958	2.71153	922.36	FALSE	45
2022-09-15	11:19:20	0.365662	1.62654	949.043	FALSE	45
2022-09-15	11:19:20	0.445	1.97945	924.339	FALSE	45
2022-09-15	11:19:20	0.249529	1.10995	950.153	FALSE	45
2022-09-15	11:19:20	0.40958	1.82189	926.161	FALSE	45
2022-09-15	11:19:21	0.335942	1.49434	951.647	FALSE	45
2022-09-15	11:19:21	0.288817	1.28472	927.446	FALSE	45
2022-09-15	11:19:21	0.163015	0.725123	952.372	FALSE	45
2022-09-15	11:19:22	-0.30019	-1.33531	927.446	FALSE	45
2022-09-15	11:19:22	-0.299682	-1.33305	952.372	FALSE	45
2022-09-15	11:19:22	-0.434949	-1.93474	927.446	FALSE	45
2022-09-15	11:19:22	-0.399071	-1.77515	952.372	FALSE	45
2022-09-15	11:19:23	-0.554491	-2.46649	927.446	FALSE	45
2022-09-15	11:19:23	-0.528689	-2.35171	952.372	FALSE	45
2022-09-15	11:19:23	-0.532659	-2.36937	927.446	FALSE	45
2022-09-15	11:19:23	-0.353473	-1.57232	952.372	FALSE	45
2022-09-15	11:19:24	0.0236262	0.105094	927.551	FALSE	45
2022-09-15	11:19:24	1.23324	5.4857	957.858	FALSE	45
2022-09-15	11:19:24	2.36205	10.5069	938.058	FALSE	45
2022-09-15	11:19:24	2.15579	9.58939	967.447	FALSE	45
2022-09-15	11:19:25	2.71116	12.0598	950.117	FALSE	45
2022-09-15	11:19:25	1.72413	7.66928	975.116	FALSE	45
2022-09-15	11:19:25	1.48434	6.60264	956.72	FALSE	45
2022-09-15	11:19:26	4.05563	18.0403	993.157	1	46
2022-09-15	11:19:26	2.08388	9.26952	965.99	FALSE	46
2022-09-15	11:19:26	3.88678	17.2892	1010.45	1	47
2022-09-15	11:19:26	4.74668	21.1142	987.104	1	48
2022-09-15	11:19:27	3.75889	16.7203	1027.17	1	49
2022-09-15	11:19:27	2.70678	12.0403	999.144	FALSE	49
2022-09-15	11:19:27	1.01691	4.52342	1031.69	FALSE	49
2022-09-15	11:19:27	3.50261	15.5803	1014.72	1	50
2022-09-15	11:19:28	1.8078	8.04146	1039.73	FALSE	50
2022-09-15	11:19:28	2.01645	8.96957	1023.69	FALSE	50
2022-09-15	11:19:28	3.58648	15.9534	1055.68	1	51
2022-09-15	11:19:28	2.25543	10.0326	1033.73	FALSE	51
2022-09-15	11:19:29	1.98169	8.81495	1064.5	FALSE	51
2022-09-15	11:19:29	1.46108	6.49918	1040.23	FALSE	51
2022-09-15	11:19:29	1.72617	7.67835	1072.18	FALSE	51
2022-09-15	11:19:30	1.66994	7.42823	1047.65	FALSE	51
2022-09-15	11:19:30	0.628511	2.79574	1074.97	FALSE	51
2022-09-15	11:19:30	0.292532	1.30124	1048.96	FALSE	51
2022-09-15	11:19:30	0.70785	3.14866	1078.12	FALSE	51
2022-09-15	11:19:31	0.244593	1.088	1050.04	FALSE	51
2022-09-15	11:19:31	0.178232	0.792812	1078.91	FALSE	51
2022-09-15	11:19:31	0.299911	1.33406	1051.38	FALSE	51
2022-09-15	11:19:31	0.201845	0.897847	1079.81	FALSE	51
2022-09-15	11:19:32	0.166629	0.741199	1052.12	FALSE	51
2022-09-15	11:19:32	0.288715	1.28426	1081.1	FALSE	51
2022-09-15	11:19:32	0.287239	1.2777	1053.4	FALSE	51
2022-09-15	11:19:32	0.412379	1.83434	1082.93	FALSE	51
2022-09-15	11:19:33	0.278842	1.24034	1054.64	FALSE	51
2022-09-15	11:19:33	0.746578	3.32093	1086.25	FALSE	51
2022-09-15	11:19:33	0.517926	2.30384	1056.94	FALSE	51
2022-09-15	11:19:34	0.985611	4.38419	1090.64	FALSE	51
2022-09-15	11:19:34	1.84816	8.22099	1065.16	FALSE	51
2022-09-15	11:19:34	1.17859	5.2426	1095.88	FALSE	51
2022-09-15	11:19:34	1.29365	5.75441	1070.92	FALSE	51
2022-09-15	11:19:35	0.499758	2.22302	1098.1	FALSE	51
2022-09-15	11:19:35	1.13838	5.06374	1075.98	FALSE	51
2022-09-15	11:19:35	1.67141	7.43477	1105.54	FALSE	51
2022-09-15	11:19:35	1.08571	4.82946	1080.81	FALSE	51
2022-09-15	11:19:36	1.50098	6.67666	1112.21	FALSE	51
2022-09-15	11:19:36	1.09503	4.87091	1085.68	FALSE	51
2022-09-15	11:19:36	1.52123	6.76674	1118.98	FALSE	51
2022-09-15	11:19:36	0.871972	3.87871	1089.56	FALSE	51
2022-09-15	11:19:37	1.70093	7.56608	1126.55	FALSE	51
2022-09-15	11:19:37	1.3392	5.95703	1095.52	FALSE	51
2022-09-15	11:19:37	1.36032	6.05098	1132.6	FALSE	51
2022-09-15	11:19:38	0.26612	1.18375	1096.7	FALSE	51
2022-09-15	11:19:38	0.425254	1.89161	1134.49	FALSE	51
2022-09-15	11:19:38	0.357723	1.59122	1098.29	FALSE	51
2022-09-15	11:19:38	0.543168	2.41612	1136.91	FALSE	51
2022-09-15	11:19:39	0.607951	2.70429	1100.99	FALSE	51
2022-09-15	11:19:39	0.52897	2.35296	1139.26	FALSE	51
2022-09-15	11:19:39	0.538588	2.39575	1103.39	FALSE	51
2022-09-15	11:19:39	0.474873	2.11233	1141.37	FALSE	51
2022-09-15	11:19:40	0.387748	1.72478	1105.12	FALSE	51
2022-09-15	11:19:40	0.396909	1.76553	1143.14	FALSE	51
2022-09-15	11:19:40	0.241234	1.07306	1106.19	FALSE	51
2022-09-15	11:19:41	0.109122	0.485396	1143.62	FALSE	51
2022-09-15	11:19:41	0.2364	1.05155	1107.24	FALSE	51
2022-09-15	11:19:41	0.247697	1.10181	1144.72	FALSE	51
2022-09-15	11:19:41	0.0635244	0.282569	1107.52	FALSE	51
2022-09-15	11:19:42	0.175687	0.781491	1145.5	FALSE	51
2022-09-15	11:19:42	0.199809	0.88879	1108.41	FALSE	51
2022-09-15	11:19:42	0.183219	0.814995	1146.32	FALSE	51
2022-09-15	11:19:42	0.774568	3.44543	1111.86	FALSE	51
2022-09-15	11:19:43	1.86291	8.2866	1154.61	FALSE	51
2022-09-15	11:19:43	9.30159	41.3753	1153.23	1	52
2022-09-15	11:19:43	5.02978	22.3735	1176.98	1	53
2022-09-15	11:19:43	5.66372	25.1934	1178.43	1	54
2022-09-15	11:19:44	1.87508	8.34073	1185.32	FALSE	54
2022-09-15	11:19:44	2.31462	10.2959	1188.72	FALSE	54
2022-09-15	11:19:44	2.51889	11.2045	1196.52	FALSE	54
2022-09-15	11:19:45	0.896298	3.98691	1192.71	FALSE	54
2022-09-15	11:19:45	0.911463	4.05437	1200.58	FALSE	54
2022-09-15	11:19:45	0.310191	1.37979	1194.09	FALSE	54
2022-09-15	11:19:45	0.899351	4.00049	1204.58	FALSE	54
2022-09-15	11:19:46	1.17024	5.20546	1199.29	FALSE	54
2022-09-15	11:19:46	3.86195	17.1787	1221.76	1	55
2022-09-15	11:19:46	8.43675	37.5284	1236.82	1	56
2022-09-15	11:19:46	4.57512	20.351	1242.11	1	57
2022-09-15	11:19:47	4.15691	18.4908	1255.31	1	58
2022-09-15	11:19:47	3.05258	13.5785	1255.69	1	59
2022-09-15	11:19:47	1.2509	5.56425	1260.88	FALSE	59
2022-09-15	11:19:47	2.03411	9.04813	1264.74	FALSE	59
2022-09-15	11:19:48	1.9166	8.52542	1269.4	FALSE	59
2022-09-15	11:19:48	2.62592	11.6806	1276.42	FALSE	59
2022-09-15	11:19:48	3.52398	15.6754	1285.08	1	60
2022-09-15	11:19:49	3.31151	14.7303	1291.15	1	61
2022-09-15	11:19:49	3.74022	16.6372	1301.71	1	62
2022-09-15	11:19:49	2.69996	12.01	1303.16	FALSE	62
2022-09-15	11:19:49	4.22907	18.8117	1320.53	1	63
2022-09-15	11:19:50	2.85747	12.7106	1315.87	FALSE	63
2022-09-15	11:19:50	2.94698	13.1088	1333.64	FALSE	63
2022-09-15	11:19:50	2.5479	11.3336	1327.2	FALSE	63
2022-09-15	11:19:50	2.09111	9.30168	1342.94	FALSE	63
2022-09-15	11:19:51	2.11915	9.4264	1336.63	FALSE	63
2022-09-15	11:19:51	1.63126	7.25617	1350.19	FALSE	63
2022-09-15	11:19:51	0.954924	4.24769	1340.88	FALSE	63
2022-09-15	11:19:51	0.584949	2.60197	1352.8	FALSE	63
2022-09-15	11:19:52	0.3164	1.40741	1342.28	FALSE	63
2022-09-15	11:19:52	0.655382	2.91527	1355.71	FALSE	63
2022-09-15	11:19:52	0.207392	0.922521	1343.21	FALSE	63
2022-09-15	11:19:53	0.333957	1.48551	1357.2	FALSE	63
2022-09-15	11:19:53	0.0950766	0.42292	1343.63	FALSE	63
2022-09-15	11:19:53	0.22042	0.980472	1358.18	FALSE	63
2022-09-15	11:19:53	0.13869	0.616921	1344.25	FALSE	63
2022-09-15	11:19:54	0.268766	1.19552	1359.37	FALSE	63
2022-09-15	11:19:54	0.0678501	0.301811	1344.55	FALSE	63
2022-09-15	11:19:54	0.231412	1.02937	1360.4	FALSE	63
2022-09-15	11:19:54	0.234211	1.04182	1345.59	FALSE	63
2022-09-15	11:19:55	0.116451	0.517997	1360.92	FALSE	63
2022-09-15	11:19:55	0.31416	1.39745	1346.99	FALSE	63
2022-09-15	11:19:55	0.266629	1.18602	1362.11	FALSE	63
2022-09-15	11:19:55	0.432837	1.92535	1348.91	FALSE	63
2022-09-15	11:19:56	0.25757	1.14572	1363.25	FALSE	63
2022-09-15	11:19:56	0.419199	1.86468	1350.78	FALSE	63
2022-09-15	11:19:56	0.356603	1.58624	1364.84	FALSE	63
2022-09-15	11:19:57	0.456501	2.03061	1352.81	FALSE	63
2022-09-15	11:19:57	0.393448	1.75014	1366.59	FALSE	63
2022-09-15	11:19:57	0.240064	1.06785	1353.87	FALSE	63
2022-09-15	11:19:57	0.315789	1.40469	1367.99	FALSE	63
2022-09-15	11:19:58	0.220267	0.979792	1354.85	FALSE	63
2022-09-15	11:19:58	0.380013	1.69037	1369.68	FALSE	63
2022-09-15	11:19:58	0.0925829	0.411827	1355.27	FALSE	63
2022-09-15	11:19:58	0.208919	0.929313	1370.61	FALSE	63
2022-09-15	11:19:59	0.179962	0.800507	1356.07	FALSE	63
2022-09-15	11:19:59	0.324288	1.4425	1372.05	FALSE	63
2022-09-15	11:19:59	0.138537	0.61624	1356.68	FALSE	63
2022-09-15	11:19:59	0.235636	1.04816	1373.1	FALSE	63
2022-09-15	11:20:00	0.375484	1.67023	1358.35	FALSE	63
2022-09-15	11:20:00	0.0732445	0.325806	1373.43	FALSE	63
2022-09-15	11:20:00	0.325967	1.44997	1359.8	FALSE	63
2022-09-15	11:20:01	0.170649	0.759081	1374.19	FALSE	63
2022-09-15	11:20:01	0.246985	1.09864	1360.9	FALSE	63
2022-09-15	11:20:01	0.194975	0.867288	1375.05	FALSE	63
2022-09-15	11:20:01	0.222252	0.988621	1361.89	FALSE	63
2022-09-15	11:20:02	0.560929	2.49512	1377.55	FALSE	63
2022-09-15	11:20:02	0.80215	3.56812	1365.46	FALSE	63
2022-09-15	11:20:02	2.67986	11.9206	1389.47	FALSE	63
2022-09-15	11:20:02	6.33894	28.1969	1393.66	1	64
2022-09-15	11:20:03	8.24937	36.6948	1426.17	1	65
2022-09-15	11:20:03	4.71981	20.9947	1414.65	1	66
2022-09-15	11:20:03	3.97533	17.6831	1443.85	1	67
2022-09-15	11:20:03	2.01711	8.97251	1423.62	FALSE	67
2022-09-15	11:20:04	0.278792	1.24012	1445.09	FALSE	67
2022-09-15	11:20:04	0.840623	3.73926	1427.36	FALSE	67
2022-09-15	11:20:04	1.55436	6.9141	1452	FALSE	67
2022-09-15	11:20:05	6.13721	27.2995	1454.66	1	68
2022-09-15	11:20:05	12.1089	53.8628	1505.87	1	69
2022-09-15	11:20:05	18.5966	82.7214	1537.38	1	70
2022-09-15	11:20:05	19.0466	84.7231	1590.59	1	71
2022-09-15	11:20:06	2.96296	13.1798	1550.56	FALSE	71
2022-09-15	11:20:06	4.90632	21.8243	1612.41	1	72
2022-09-15	11:20:06	1.7708	7.87687	1558.44	FALSE	72
2022-09-15	11:20:06	11.7027	52.056	1664.47	1	73
2022-09-15	11:20:07	3.04912	13.5631	1572	1	74
2022-09-15	11:20:07	2.9853	13.2792	1677.75	FALSE	74
2022-09-15	11:20:07	5.23421	23.2828	1595.29	1	75
2022-09-15	11:20:07	10.0168	44.5567	1722.3	1	76
2022-09-15	11:20:08	18.2244	81.0658	1676.35	1	77
2022-09-15	11:20:08	4.06825	18.0964	1740.4	1	78
2022-09-15	11:20:08	0.85243	3.79178	1680.14	FALSE	78
2022-09-15	11:20:09	0.283422	1.26072	1741.66	FALSE	78
2022-09-15	11:20:09	-0.0197326	-0.0877746	1680.14	FALSE	78
2022-09-15	11:20:09	0.498028	2.21533	1743.88	FALSE	78
2022-09-15	11:20:09	2.30078	10.2343	1690.38	FALSE	78
2022-09-15	11:20:10	2.71309	12.0684	1755.95	FALSE	78
2022-09-15	11:20:10	1.00561	4.47315	1694.85	FALSE	78
2022-09-15	11:20:10	0.105356	0.468645	1756.41	FALSE	78
2022-09-15	11:20:10	0.492277	2.18975	1697.04	FALSE	78
2022-09-15	11:20:11	2.97131	13.217	1769.63	FALSE	78
2022-09-15	11:20:11	10.4297	46.3934	1743.43	1	79
2022-09-15	11:20:11	9.51278	42.3147	1811.95	1	80
2022-09-15	11:20:11	3.83482	17.058	1760.49	1	81
2022-09-15	11:20:12	3.82556	17.0169	1828.96	1	82
2022-09-15	11:20:12	1.6592	7.38045	1767.87	FALSE	82
2022-09-15	11:20:12	2.62164	11.6616	1840.62	FALSE	82
2022-09-15	11:20:13	2.15594	9.59005	1777.46	FALSE	82
2022-09-15	11:20:13	2.53141	11.2602	1851.88	FALSE	82
2022-09-15	11:20:13	1.52775	6.79574	1784.26	FALSE	82
2022-09-15	11:20:13	2.94887	13.1172	1865	FALSE	82
2022-09-15	11:20:14	3.1365	13.9518	1798.21	1	83
2022-09-15	11:20:14	3.38261	15.0465	1880.05	1	84
2022-09-15	11:20:14	2.99431	13.3193	1811.53	FALSE	84
2022-09-15	11:20:14	2.98765	13.2897	1893.34	FALSE	84
2022-09-15	11:20:15	3.09548	13.7693	1825.3	1	85
2022-09-15	11:20:15	1.60169	7.12464	1900.46	FALSE	85
2022-09-15	11:20:15	2.85217	12.687	1837.99	FALSE	85
2022-09-15	11:20:16	0.748766	3.33066	1903.79	FALSE	85
2022-09-15	11:20:16	1.34373	5.97718	1843.96	FALSE	85
2022-09-15	11:20:16	0.580573	2.5825	1906.38	FALSE	85
2022-09-15	11:20:16	0.847595	3.77027	1847.73	FALSE	85
2022-09-15	11:20:17	1.12098	4.98634	1911.36	FALSE	85
2022-09-15	11:20:17	0.95528	4.24928	1851.98	FALSE	85
2022-09-15	11:20:17	0.8764	3.8984	1915.26	FALSE	85
2022-09-15	11:20:17	0.365255	1.62473	1853.61	FALSE	85
2022-09-15	11:20:18	0.693499	3.08482	1918.35	FALSE	85
2022-09-15	11:20:18	0.976043	4.34163	1857.95	FALSE	85
2022-09-15	11:20:18	0.7193	3.19959	1921.54	FALSE	85
2022-09-15	11:20:18	0.624287	2.77695	1860.73	FALSE	85
2022-09-15	11:20:19	0.577723	2.56983	1924.11	FALSE	85
2022-09-15	11:20:19	0.191565	0.852119	1861.58	FALSE	85
2022-09-15	11:20:19	0.318079	1.41488	1925.53	FALSE	85
2022-09-15	11:20:20	0.745203	3.31481	1864.89	FALSE	85
2022-09-15	11:20:20	1.6281	7.24211	1932.77	FALSE	85
2022-09-15	11:20:20	1.69162	7.52466	1872.42	FALSE	85
2022-09-15	11:20:20	2.79319	12.4247	1945.2	FALSE	85
2022-09-15	11:20:21	2.94184	13.0859	1885.5	FALSE	85
2022-09-15	11:20:21	1.07396	4.77719	1949.97	FALSE	85
2022-09-15	11:20:21	2.11075	9.38904	1894.89	FALSE	85
2022-09-15	11:20:21	1.53971	6.84894	1956.82	FALSE	85
2022-09-15	11:20:22	2.20612	9.81326	1904.71	FALSE	85
2022-09-15	11:20:22	0.547697	2.43627	1959.26	FALSE	85
2022-09-15	11:20:22	0.503422	2.23932	1906.94	FALSE	85
2022-09-15	11:20:22	0.0929391	0.413412	1959.67	FALSE	85
2022-09-15	11:20:23	-0.260954	-1.16078	1906.94	FALSE	85
2022-09-15	11:20:23	-0.30757	-1.36813	1959.67	FALSE	85
2022-09-15	11:20:23	-0.206297	-0.91765	1906.94	FALSE	85
2022-09-15	11:20:24	0.102659	0.456648	1960.13	FALSE	85
2022-09-15	11:20:24	-0.0989183	-0.440008	1906.94	FALSE	85
2022-09-15	11:20:24	0.120318	0.535199	1960.66	FALSE	85
2022-09-15	11:20:24	-0.0554578	-0.246687	1906.94	FALSE	85
2022-09-15	11:20:25	0.148359	0.659931	1961.32	FALSE	85
2022-09-15	11:20:25	-0.00919824	-0.0409156	1906.94	FALSE	85
2022-09-15	11:20:25	0.170395	0.757951	1962.08	FALSE	85
2022-09-15	11:20:25	0.241845	1.07577	1908.02	FALSE	85
2022-09-15	11:20:26	0.229428	1.02054	1963.1	FALSE	85
2022-09-15	11:20:26	0.0953819	0.424278	1908.44	FALSE	85
2022-09-15	11:20:26	0.119453	0.531351	1963.63	FALSE	85
2022-09-15	11:20:26	0.369936	1.64555	1910.09	FALSE	85
2022-09-15	11:20:27	0.142659	0.634576	1964.27	FALSE	85
2022-09-15	11:20:27	0.423728	1.88483	1911.97	FALSE	85
2022-09-15	11:20:27	0.513092	2.28234	1966.55	FALSE	85
2022-09-15	11:20:28	0.989733	4.40253	1916.38	FALSE	85
2022-09-15	11:20:28	1.05243	4.68142	1971.23	FALSE	85
2022-09-15	11:20:28	0.470395	2.09241	1918.47	FALSE	85
2022-09-15	11:20:28	0.0974684	0.433559	1971.67	FALSE	85
2022-09-15	11:20:29	0.315076	1.40152	1919.87	FALSE	85
2022-09-15	11:20:29	0.164186	0.730332	1972.4	FALSE	85
2022-09-15	11:20:29	0.301896	1.34289	1921.21	FALSE	85
2022-09-15	11:20:29	0.175178	0.779227	1973.18	FALSE	85
2022-09-15	11:20:30	0.207799	0.924332	1922.14	FALSE	85
2022-09-15	11:20:30	0.581132	2.58499	1975.76	FALSE	85
2022-09-15	11:20:30	0.259708	1.15523	1923.29	FALSE	85
2022-09-15	11:20:30	0.294771	1.3112	1977.07	FALSE	85
2022-09-15	11:20:31	0.317876	1.41398	1924.71	FALSE	85
2022-09-15	11:20:31	0.570445	2.53745	1979.61	FALSE	85
2022-09-15	11:20:31	1.59019	7.07348	1931.78	FALSE	85
2022-09-15	11:20:32	4.35879	19.3888	1999	1	86
2022-09-15	11:20:32	5.76057	25.6242	1957.41	1	87
2022-09-15	11:20:32	6.93777	30.8606	2029.86	1	88
2022-09-15	11:20:32	9.96041	44.3059	2001.71	1	89
2022-09-15	11:20:33	16.1208	71.7085	2101.57	1	90
2022-09-15	11:20:33	10.3716	46.135	2047.85	1	91
2022-09-15	11:20:33	11.7409	52.2259	2153.79	1	92
2022-09-15	11:20:33	19.1825	85.3276	2133.17	1	93
2022-09-15	11:20:34	8.61207	38.3082	2192.1	1	94
2022-09-15	11:20:34	5.21166	23.1825	2156.36	1	95
2022-09-15	11:20:34	3.97614	17.6867	2209.79	1	96
2022-09-15	11:20:34	4.08179	18.1566	2174.51	1	97
2022-09-15	11:20:35	3.10775	13.8239	2223.61	1	98
2022-09-15	11:20:35	2.98016	13.2563	2187.77	FALSE	98
2022-09-15	11:20:35	2.25961	10.0512	2233.66	FALSE	98
2022-09-15	11:20:36	1.931	8.58947	2196.36	FALSE	98
2022-09-15	11:20:36	2.3819	10.5952	2244.26	FALSE	98
2022-09-15	11:20:36	1.84912	8.22526	2204.58	FALSE	98
2022-09-15	11:20:36	0.952277	4.23592	2248.49	FALSE	98
2022-09-15	11:20:37	1.83808	8.17615	2212.76	FALSE	98
2022-09-15	11:20:37	2.78861	12.4043	2260.9	FALSE	98
2022-09-15	11:20:37	2.61502	11.6321	2224.39	FALSE	98
2022-09-15	11:20:37	3.35319	14.9157	2275.81	1	99
2022-09-15	11:20:38	4.59528	20.4407	2244.83	1	100
2022-09-15	11:20:38	7.40943	32.9586	2308.77	1	101
2022-09-15	11:20:38	6.11858	27.2167	2272.05	1	102
2022-09-15	11:20:38	8.98148	39.9514	2348.72	1	103
2022-09-15	11:20:39	11.7145	52.1084	2324.16	1	104
2022-09-15	11:20:39	8.7482	38.9137	2387.64	1	105
2022-09-15	11:20:39	4.94108	21.9789	2346.14	1	106
2022-09-15	11:20:40	4.90256	21.8076	2409.44	1	107
2022-09-15	11:20:40	7.95919	35.4041	2381.54	1	108
2022-09-15	11:20:40	10.2421	45.5589	2455	1	109
2022-09-15	11:20:40	7.90876	35.1797	2416.72	1	110
2022-09-15	11:20:41	5.63726	25.0757	2480.08	1	111
2022-09-15	11:20:41	6.10332	27.1488	2443.87	1	112
2022-09-15	11:20:41	6.96067	30.9625	2511.04	1	113
2022-09-15	11:20:41	4.75731	21.1615	2465.03	1	114
2022-09-15	11:20:42	3.26632	14.5292	2525.57	1	115
2022-09-15	11:20:42	3.32927	14.8093	2479.84	1	116
2022-09-15	11:20:42	4.91681	21.871	2547.44	1	117
2022-09-15	11:20:42	4.96774	22.0975	2501.94	1	118
2022-09-15	11:20:43	4.5936	20.4333	2567.88	1	119
2022-09-15	11:20:43	3.81492	16.9695	2518.91	1	120
2022-09-15	11:20:43	3.12383	13.8954	2581.77	1	121
2022-09-15	11:20:44	1.32561	5.89658	2524.8	FALSE	121
2022-09-15	11:20:44	0.45472	2.02269	2583.79	FALSE	121
2022-09-15	11:20:44	0.448206	1.99371	2526.8	FALSE	121
2022-09-15	11:20:44	0.459453	2.04374	2585.84	FALSE	121
2022-09-15	11:20:45	0.497367	2.21239	2529.01	FALSE	121
2022-09-15	11:20:45	0.862608	3.83705	2589.67	FALSE	121
2022-09-15	11:20:45	0.257926	1.14731	2530.16	FALSE	121
2022-09-15	11:20:45	0.173957	0.773796	2590.45	FALSE	121
2022-09-15	11:20:46	0.208257	0.926369	2531.08	FALSE	121
2022-09-15	11:20:46	0.117672	0.523429	2590.97	FALSE	121
2022-09-15	11:20:46	-0.0585112	-0.26027	2531.08	FALSE	121
2022-09-15	11:20:46	-0.0103687	-0.0461221	2590.97	FALSE	121
2022-09-15	11:20:47	-0.0326079	-0.145046	2531.08	FALSE	121
2022-09-15	11:20:47	-0.0919462	-0.408995	2590.97	FALSE	121
2022-09-15	11:20:47	-0.305534	-1.35908	2531.08	FALSE	121
2022-09-15	11:20:48	-0.156119	-0.694449	2590.97	FALSE	121
2022-09-15	11:20:48	-0.124618	-0.554326	2531.08	FALSE	121
2022-09-15	11:20:48	0.0931427	0.414317	2591.39	FALSE	121
2022-09-15	11:20:48	3.50128	15.5744	2546.66	1	122
2022-09-15	11:20:49	3.12149	13.885	2605.27	1	123
2022-09-15	11:20:49	7.28678	32.4131	2579.07	1	124
2022-09-15	11:20:49	2.22566	9.90018	2615.17	FALSE	124
2022-09-15	11:20:50	4.95971	22.0618	2601.13	1	125
2022-09-15	11:20:50	3.54225	15.7566	2630.93	1	126
2022-09-15	11:20:50	0.648562	2.88493	2604.02	FALSE	126
2022-09-15	11:20:50	3.05024	13.5681	2644.5	1	127
2022-09-15	11:20:50	2.208	9.82163	2613.84	FALSE	127
2022-09-15	11:20:51	1.96017	8.71923	2653.21	FALSE	127
2022-09-15	11:20:51	2.33981	10.4079	2624.25	FALSE	127
2022-09-15	11:20:51	0.642099	2.85618	2656.07	FALSE	127
2022-09-15	11:20:52	1.32561	5.89658	2630.14	FALSE	127
2022-09-15	11:20:52	1.53747	6.83897	2662.91	FALSE	127
2022-09-15	11:20:52	0.285255	1.26887	2631.41	FALSE	127
2022-09-15	11:20:52	0.928613	4.13066	2667.04	FALSE	127
2022-09-15	11:20:53	0.394211	1.75353	2633.17	FALSE	127
2022-09-15	11:20:53	0.48785	2.17005	2669.21	FALSE	127
2022-09-15	11:20:53	0.272634	1.21273	2634.38	FALSE	127
2022-09-15	11:20:53	-0.132811	-0.59077	2669.21	FALSE	127
2022-09-15	11:20:54	-0.6636	-2.95183	2634.38	FALSE	127
2022-09-15	11:20:54	-0.302023	-1.34346	2669.21	FALSE	127
2022-09-15	11:20:54	0.122812	0.546292	2634.93	FALSE	127
2022-09-15	11:20:54	0.0737534	0.32807	2669.54	FALSE	127
2022-09-15	11:20:55	0.254008	1.12988	2636.06	FALSE	127
2022-09-15	11:20:55	0.412023	1.83276	2671.37	FALSE	127
2022-09-15	11:20:55	0.316654	1.40854	2637.46	FALSE	127
2022-09-15	11:20:56	0.870547	3.87237	2675.24	FALSE	127
2022-09-15	11:20:56	0.573397	2.55058	2640.01	FALSE	127
2022-09-15	11:20:56	0.930293	4.13813	2679.38	FALSE	127
2022-09-15	11:20:56	0.967494	4.30361	2644.32	FALSE	127
2022-09-15	11:20:57	0.984796	4.38057	2683.76	FALSE	127
2022-09-15	11:20:57	1.49523	6.65108	2650.97	FALSE	127
2022-09-15	11:20:57	0.786425	3.49818	2687.26	FALSE	127
2022-09-15	11:20:57	1.77482	7.89475	2658.86	FALSE	127
2022-09-15	11:20:58	0.989326	4.40072	2691.66	FALSE	127
2022-09-15	11:20:58	0.78215	3.47916	2662.34	FALSE	127
2022-09-15	11:20:58	0.577977	2.57096	2694.23	FALSE	127
2022-09-15	11:20:59	0.587239	2.61216	2664.96	FALSE	127
2022-09-15	11:20:59	0.232685	1.03503	2695.27	FALSE	127
2022-09-15	11:20:59	0.4936	2.19563	2667.15	FALSE	127
2022-09-15	11:20:59	0.56388	2.50825	2697.78	FALSE	127
2022-09-15	11:21:00	0.712176	3.1679	2670.32	FALSE	127
2022-09-15	11:21:00	0.721234	3.20819	2700.98	FALSE	127
2022-09-15	11:21:00	0.728104	3.23875	2673.56	FALSE	127
2022-09-15	11:21:00	0.72673	3.23264	2704.22	FALSE	127
2022-09-15	11:21:01	0.723524	3.21838	2676.78	FALSE	127
2022-09-15	11:21:01	0.731158	3.25234	2707.47	FALSE	127
2022-09-15	11:21:01	0.530903	2.36156	2679.14	FALSE	127
2022-09-15	11:21:01	0.438181	1.94912	2709.42	FALSE	127
2022-09-15	11:21:02	1.07197	4.76834	2683.91	FALSE	127
2022-09-15	11:21:02	3.688	16.405	2725.82	1	128
2022-09-15	11:21:02	9.65696	42.9561	2726.86	1	129
2022-09-15	11:21:03	12.3789	55.0638	2780.89	1	130
2022-09-15	11:21:03	11.1639	49.6593	2776.52	1	131
2022-09-15	11:21:03	2.64561	11.7682	2792.66	FALSE	131
2022-09-15	11:21:03	5.52062	24.5568	2801.08	1	132
2022-09-15	11:21:04	4.33029	19.262	2811.92	1	133
2022-09-15	11:21:04	0.978181	4.35114	2805.43	FALSE	133
2022-09-15	11:21:04	2.07747	9.241	2821.16	FALSE	133
2022-09-15	11:21:04	2.98169	13.2632	2818.69	FALSE	133
2022-09-15	11:21:05	1.5795	7.02593	2828.18	FALSE	133
2022-09-15	11:21:05	0.726832	3.23309	2821.93	FALSE	133
2022-09-15	11:21:05	0.752227	3.34606	2831.53	FALSE	133
2022-09-15	11:21:05	3.4281	15.2489	2837.17	1	134
2022-09-15	11:21:06	0.922863	4.10508	2835.64	FALSE	134
2022-09-15	11:21:06	1.38144	6.14492	2843.32	FALSE	134
2022-09-15	11:21:06	2.94815	13.114	2848.75	FALSE	134
2022-09-15	11:21:07	2.03243	9.04066	2852.36	FALSE	134
2022-09-15	11:21:07	4.34907	19.3455	2868.09	1	135
2022-09-15	11:21:07	2.20027	9.78724	2862.15	FALSE	135
2022-09-15	11:21:07	2.78449	12.386	2880.48	FALSE	135
2022-09-15	11:21:08	1.59874	7.11152	2869.26	FALSE	135
2022-09-15	11:21:08	1.00454	4.46839	2884.95	FALSE	135
2022-09-15	11:21:08	1.64352	7.31071	2876.57	FALSE	135
2022-09-15	11:21:08	0.246679	1.09728	2886.05	FALSE	135
2022-09-15	11:21:09	0.362659	1.61318	2878.18	FALSE	135
2022-09-15	11:21:09	1.27843	5.68671	2891.73	FALSE	135
2022-09-15	11:21:09	0.686985	3.05585	2881.24	FALSE	135
2022-09-15	11:21:09	1.86184	8.28184	2900.01	FALSE	135
2022-09-15	11:21:10	3.22306	14.3368	2895.58	1	136
2022-09-15	11:21:10	3.628	16.1381	2916.15	1	137
2022-09-15	11:21:10	2.18907	9.73742	2905.31	FALSE	137
2022-09-15	11:21:11	2.27375	10.1141	2926.27	FALSE	137
2022-09-15	11:21:11	5.38897	23.9712	2929.28	1	138
2022-09-15	11:21:11	2.63513	11.7216	2937.99	FALSE	138
2022-09-15	11:21:11	2.91329	12.9589	2942.24	FALSE	138
2022-09-15	11:21:12	2.4652	10.9657	2948.95	FALSE	138
2022-09-15	11:21:12	1.73156	7.70233	2949.95	FALSE	138
2022-09-15	11:21:12	4.69462	20.8826	2969.84	1	139
2022-09-15	11:21:12	3.17614	14.1281	2964.07	1	140
2022-09-15	11:21:13	3.30011	14.6795	2984.52	1	141
2022-09-15	11:21:13	1.54597	6.87678	2970.95	FALSE	141
2022-09-15	11:21:13	2.29304	10.1999	2994.72	FALSE	141
2022-09-15	11:21:13	5.11044	22.7323	2993.68	1	142
2022-09-15	11:21:14	1.46683	6.52475	3001.24	FALSE	142
2022-09-15	11:21:14	2.23859	9.9577	3003.64	FALSE	142
2022-09-15	11:21:14	3.62622	16.1302	3017.37	1	143
2022-09-15	11:21:15	2.82276	12.5562	3016.2	FALSE	143
2022-09-15	11:21:15	2.39884	10.6705	3028.04	FALSE	143
2022-09-15	11:21:15	0.520471	2.31516	3018.51	FALSE	143
2022-09-15	11:21:15	3.08749	13.7338	3041.78	1	144
2022-09-15	11:21:16	0.710954	3.16247	3021.67	FALSE	144
2022-09-15	11:21:16	0.850191	3.78182	3045.56	FALSE	144
2022-09-15	11:21:16	2.24434	9.98327	3031.66	FALSE	144
2022-09-15	11:21:16	1.16093	5.16405	3050.72	FALSE	144
2022-09-15	11:21:17	0.273855	1.21816	3032.88	FALSE	144
2022-09-15	11:21:17	0.159148	0.707922	3051.43	FALSE	144
2022-09-15	11:21:17	0.104542	0.465024	3033.34	FALSE	144
2022-09-15	11:21:17	-0.210216	-0.935083	3051.43	FALSE	144
2022-09-15	11:21:18	-0.0261448	-0.116297	3033.34	FALSE	144
2022-09-15	11:21:18	0.211921	0.942667	3052.37	FALSE	144
2022-09-15	11:21:18	1.94556	8.65424	3041.99	FALSE	144
2022-09-15	11:21:19	1.38128	6.14421	3058.52	FALSE	144
2022-09-15	11:21:19	0.92444	4.11209	3046.11	FALSE	144
2022-09-15	11:21:19	0.551107	2.45143	3060.97	FALSE	144
2022-09-15	11:21:19	0.242049	1.07668	3047.18	FALSE	144
2022-09-15	11:21:20	0.0453565	0.201755	3061.17	FALSE	144
2022-09-15	11:21:20	0.0286135	0.127279	3047.31	FALSE	144
2022-09-15	11:21:20	0.0550766	0.244992	3061.41	FALSE	144
2022-09-15	11:21:20	0.294567	1.31029	3048.62	FALSE	144
2022-09-15	11:21:21	0.467799	2.08086	3063.5	FALSE	144
2022-09-15	11:21:21	0.549173	2.44283	3051.06	FALSE	144
2022-09-15	11:21:21	0.307952	1.36983	3064.87	FALSE	144
2022-09-15	11:21:21	0.308206	1.37096	3052.43	FALSE	144
2022-09-15	11:21:22	0.174008	0.774022	3065.64	FALSE	144
2022-09-15	11:21:22	0.312837	1.39156	3053.83	FALSE	144
2022-09-15	11:21:22	0.34042	1.51426	3067.15	FALSE	144
2022-09-15	11:21:23	0.237214	1.05518	3054.88	FALSE	144
2022-09-15	11:21:23	0.424491	1.88822	3069.04	FALSE	144
2022-09-15	11:21:23	0.447137	1.98895	3056.87	FALSE	144
2022-09-15	11:21:23	0.290496	1.29218	3070.33	FALSE	144
2022-09-15	11:21:24	0.324135	1.44182	3058.31	FALSE	144
2022-09-15	11:21:24	0.18897	0.840576	3071.17	FALSE	144
2022-09-15	11:21:24	0.34154	1.51924	3059.83	FALSE	144
2022-09-15	11:21:24	0.0956364	0.42541	3071.6	FALSE	144
2022-09-15	11:21:25	0.211565	0.941083	3060.77	FALSE	144
2022-09-15	11:21:25	0.0276974	0.123204	3071.72	FALSE	144
2022-09-15	11:21:25	-0.113269	-0.503843	3060.77	FALSE	144
2022-09-15	11:21:25	-0.237849	-1.058	3071.72	FALSE	144
2022-09-15	11:21:26	-0.144414	-0.642382	3060.77	FALSE	144
2022-09-15	11:21:26	-0.293524	-1.30565	3071.72	FALSE	144
2022-09-15	11:21:26	-0.133422	-0.593488	3060.77	FALSE	144
2022-09-15	11:21:27	-0.283244	-1.25993	3071.72	FALSE	144
2022-09-15	11:21:27	-0.176119	-0.783413	3060.77	FALSE	144
2022-09-15	11:21:27	-0.247468	-1.10079	3071.72	FALSE	144
2022-09-15	11:21:27	0.13528	0.601752	3061.37	FALSE	144
2022-09-15	11:21:28	0.156349	0.695472	3072.42	FALSE	144
2022-09-15	11:21:28	0.40098	1.78364	3063.16	FALSE	144
2022-09-15	11:21:28	0.00642519	0.0285805	3072.45	FALSE	144
2022-09-15	11:21:28	0.252634	1.12377	3064.28	FALSE	144
2022-09-15	11:21:29	0.250089	1.11245	3073.56	FALSE	144
2022-09-15	11:21:29	0.296145	1.31731	3065.6	FALSE	144
2022-09-15	11:21:29	0.243168	1.08166	3074.64	FALSE	144
2022-09-15	11:21:29	0.265713	1.18194	3066.78	FALSE	144
2022-09-15	11:21:30	0.298842	1.32931	3075.97	FALSE	144
2022-09-15	11:21:30	0.46388	2.06343	3068.84	FALSE	144
2022-09-15	11:21:30	0.357112	1.58851	3077.56	FALSE	144
2022-09-15	11:21:31	0.399809	1.77843	3070.62	FALSE	144
2022-09-15	11:21:31	0.176247	0.783982	3078.34	FALSE	144
2022-09-15	11:21:31	0.184542	0.82088	3071.44	FALSE	144
2022-09-15	11:21:31	0.167443	0.74482	3079.09	FALSE	144
2022-09-15	11:21:32	0.159148	0.707922	3072.15	FALSE	144
2022-09-15	11:21:32	0.177519	0.78964	3079.88	FALSE	144
2022-09-15	11:21:32	0.184695	0.82156	3072.97	FALSE	144
2022-09-15	11:21:32	0.187646	0.834687	3080.71	FALSE	144
2022-09-15	11:21:33	0.225662	1.00379	3073.98	FALSE	144
2022-09-15	11:21:33	0.306832	1.36485	3082.08	FALSE	144
2022-09-15	11:21:33	0.182099	0.810013	3074.79	FALSE	144
2022-09-15	11:21:33	0.252125	1.1215	3083.2	FALSE	144
2022-09-15	11:21:34	0.213804	0.951043	3075.74	FALSE	144
2022-09-15	11:21:34	0.30154	1.34131	3084.54	FALSE	144
2022-09-15	11:21:34	0.0128883	0.0573297	3075.8	FALSE	144
2022-09-15	11:21:35	0.173702	0.772661	3085.31	FALSE	144
2022-09-15	11:21:35	0.180013	0.800734	3076.6	FALSE	144
2022-09-15	11:21:35	0.116196	0.516863	3085.83	FALSE	144
2022-09-15	11:21:35	-0.082786	-0.368249	3076.6	FALSE	144
2022-09-15	11:21:36	0.314008	1.39677	3087.23	FALSE	144
2022-09-15	11:21:36	0.625662	2.78307	3079.38	FALSE	144
2022-09-15	11:21:36	0.916908	4.07859	3091.3	FALSE	144
2022-09-15	11:21:36	0.392227	1.7447	3081.12	FALSE	144
2022-09-15	11:21:37	0.168257	0.748441	3092.05	FALSE	144
2022-09-15	11:21:37	0.124339	0.553085	3081.68	FALSE	144
2022-09-15	11:21:37	0.183168	0.814768	3092.87	FALSE	144
2022-09-15	11:21:37	-0.0356104	-0.158402	3081.68	FALSE	144
2022-09-15	11:21:38	-0.130012	-0.578319	3092.87	FALSE	144
2022-09-15	11:21:38	-0.141412	-0.629029	3081.68	FALSE	144
2022-09-15	11:21:38	-0.131895	-0.586695	3092.87	FALSE	144
2022-09-15	11:21:39	-0.202481	-0.900676	3081.68	FALSE	144
2022-09-15	11:21:39	-0.286806	-1.27577	3092.87	FALSE	144
2022-09-15	11:21:39	-0.168537	-0.749686	3081.68	FALSE	144
2022-09-15	11:21:39	-0.135509	-0.602771	3092.87	FALSE	144
2022-09-15	11:21:40	-0.0362211	-0.161119	3081.68	FALSE	144
2022-09-15	11:21:40	-0.0212593	-0.0945656	3092.87	FALSE	144
2022-09-15	11:21:40	0.124848	0.555349	3082.23	FALSE	144
2022-09-15	11:21:40	0.15187	0.675548	3093.54	FALSE	144
2022-09-15	11:21:41	0.00703587	0.031297	3082.26	FALSE	144
2022-09-15	11:21:41	-0.160343	-0.713238	3093.54	FALSE	144
2022-09-15	11:21:41	-0.227824	-1.01341	3082.26	FALSE	144
2022-09-15	11:21:41	-0.397646	-1.76881	3093.54	FALSE	144
2022-09-15	11:21:42	-0.531539	-2.36439	3082.26	FALSE	144
2022-09-15	11:21:42	-0.39444	-1.75455	3093.54	FALSE	144
2022-09-15	11:21:42	-0.47902	-2.13078	3082.26	FALSE	144
2022-09-15	11:21:43	-0.343091	-1.52614	3093.54	FALSE	144
2022-09-15	11:21:43	-0.386653	-1.71991	3082.26	FALSE	144
2022-09-15	11:21:43	-0.261921	-1.16508	3093.54	FALSE	144
2022-09-15	11:21:43	-0.294135	-1.30837	3082.26	FALSE	144
2022-09-15	11:21:44	-0.206043	-0.91652	3093.54	FALSE	144
2022-09-15	11:21:44	-0.161412	-0.717993	3082.26	FALSE	144
2022-09-15	11:21:44	-0.27215	-1.21058	3093.54	FALSE	144
2022-09-15	11:21:44	-0.123855	-0.550932	3082.26	FALSE	144
2022-09-15	11:21:45	-0.206399	-0.918104	3093.54	FALSE	144
2022-09-15	11:21:45	0.0120231	0.0534812	3082.32	FALSE	144
2022-09-15	11:21:45	-0.194134	-0.863547	3093.54	FALSE	144
2022-09-15	11:21:45	-0.00690816	-0.0307289	3082.32	FALSE	144
2022-09-15	11:21:46	0.0456618	0.203113	3093.75	FALSE	144
2022-09-15	11:21:46	0.158079	0.703167	3083.02	FALSE	144
2022-09-15	11:21:46	0.157316	0.699773	3094.45	FALSE	144
2022-09-15	11:21:47	0.733448	3.26252	3086.28	FALSE	144
2022-09-15	11:21:47	1.13131	5.03229	3099.48	FALSE	144
2022-09-15	11:21:47	1.55416	6.91321	3093.2	FALSE	144
2022-09-15	11:21:47	1.4849	6.60513	3106.08	FALSE	144
2022-09-15	11:21:48	0.642354	2.85732	3096.05	FALSE	144
2022-09-15	11:21:48	0.946679	4.21102	3110.29	FALSE	144
2022-09-15	11:21:48	0.773601	3.44113	3099.49	FALSE	144
2022-09-15	11:21:48	1.65798	7.37503	3117.67	FALSE	144
2022-09-15	11:21:49	2.68754	11.9547	3111.45	FALSE	144
2022-09-15	11:21:49	1.42933	6.35795	3124.03	FALSE	144
2022-09-15	11:21:49	0.708562	3.15183	3114.6	FALSE	144
2022-09-15	11:21:50	0.203626	0.905769	3124.93	FALSE	144
2022-09-15	11:21:50	0.0528883	0.235258	3114.84	FALSE	144
2022-09-15	11:21:50	-0.0423789	-0.18851	3124.93	FALSE	144
2022-09-15	11:21:50	0.044186	0.196548	3115.03	FALSE	144
2022-09-15	11:21:51	-0.207061	-0.921049	3124.93	FALSE	144
2022-09-15	11:21:51	-0.130165	-0.579	3115.03	FALSE	144
2022-09-15	11:21:51	-0.193829	-0.86219	3124.93	FALSE	144
2022-09-15	11:21:51	-0.139224	-0.619296	3115.03	FALSE	144
2022-09-15	11:21:52	0.0956872	0.425636	3125.36	FALSE	144
2022-09-15	11:21:52	2.41156	10.7271	3125.76	FALSE	144
2022-09-15	11:21:52	5.831	25.9375	3151.3	1	145
2022-09-15	11:21:52	4.60291	20.4747	3146.23	1	146
2022-09-15	11:21:53	3.4907	15.5273	3166.82	1	147
2022-09-15	11:21:53	2.31243	10.2862	3156.52	FALSE	147
2022-09-15	11:21:53	3.81085	16.9514	3183.78	1	148
2022-09-15	11:21:54	1.05294	4.68369	3161.2	FALSE	148
2022-09-15	11:21:54	1.06022	4.71607	3188.49	FALSE	148
2022-09-15	11:21:54	0.620471	2.75998	3163.96	FALSE	148
2022-09-15	11:21:54	0.537672	2.39167	3190.88	FALSE	148
2022-09-15	11:21:55	0.100573	0.447369	3164.41	FALSE	148
2022-09-15	11:21:55	0.0572649	0.254726	3191.14	FALSE	148
2022-09-15	11:21:55	0.922659	4.10417	3168.52	FALSE	148
2022-09-15	11:21:55	2.53055	11.2564	3202.39	FALSE	148
2022-09-15	11:21:56	7.15212	31.8141	3200.33	1	149
2022-09-15	11:21:56	8.96632	39.884	3242.28	1	150
2022-09-15	11:21:56	10.8116	48.0922	3248.42	1	151
2022-09-15	11:21:56	7.03604	31.2977	3273.58	1	152
2022-09-15	11:21:57	6.30479	28.045	3276.47	1	153
2022-09-15	11:21:57	6.69395	29.776	3303.35	1	154
2022-09-15	11:21:57	6.64734	29.5687	3306.04	1	155
2022-09-15	11:21:58	10.8092	48.0815	3351.43	1	156
2022-09-15	11:21:58	6.15512	27.3792	3333.41	1	157
2022-09-15	11:21:58	13.1709	58.5868	3410.02	1	158
2022-09-15	11:21:58	11.0778	49.2763	3382.69	1	159
2022-09-15	11:21:59	9.49461	42.2339	3452.25	1	160
2022-09-15	11:21:59	10.0837	44.8543	3427.55	1	161
2022-09-15	11:21:59	6.12383	27.24	3479.49	1	162
2022-09-15	11:21:59	8.29314	36.8895	3464.43	1	163
2022-09-15	11:22:00	5.85823	26.0586	3505.55	1	164
2022-09-15	11:22:00	10.6294	47.2817	3511.72	1	165
2022-09-15	11:22:00	6.79512	30.2261	3535.78	1	166
2022-09-15	11:22:00	9.2249	41.0342	3552.75	1	167
2022-09-15	11:22:01	13.1972	58.7038	3594.48	1	168
2022-09-15	11:22:01	6.78428	30.1778	3582.93	1	169
2022-09-15	11:22:01	12.0534	53.6159	3648.1	1	170
2022-09-15	11:22:02	10.6061	47.1781	3630.11	1	171
2022-09-15	11:22:02	12.5123	55.6572	3703.76	1	172
2022-09-15	11:22:02	8.23736	36.6414	3666.75	1	173
2022-09-15	11:22:02	9.78138	43.5095	3747.27	1	174
2022-09-15	11:22:03	14.1764	63.0595	3729.81	1	175
2022-09-15	11:22:03	2.80154	12.4618	3759.73	FALSE	175
2022-09-15	11:22:03	3.37757	15.0241	3744.83	1	176
2022-09-15	11:22:03	1.11665	4.96708	3764.69	FALSE	176
2022-09-15	11:22:04	1.96556	8.7432	3753.57	FALSE	176
2022-09-15	11:22:04	1.93497	8.60713	3773.3	FALSE	176
2022-09-15	11:22:04	6.56011	29.1807	3782.76	1	177
2022-09-15	11:22:04	9.36433	41.6544	3814.96	1	178
2022-09-15	11:22:05	6.43767	28.636	3811.39	1	179
2022-09-15	11:22:05	2.62352	11.6699	3826.63	FALSE	179
2022-09-15	11:22:05	0.382354	1.70079	3813.09	FALSE	179
2022-09-15	11:22:06	0.44958	1.99982	3828.63	FALSE	179
2022-09-15	11:22:06	0.660369	2.93745	3816.03	FALSE	179
2022-09-15	11:22:06	1.18424	5.26774	3833.89	FALSE	179
2022-09-15	11:22:06	5.98383	26.6173	3842.65	1	180
2022-09-15	11:22:07	3.642	16.2003	3850.09	1	181
2022-09-15	11:22:07	2.95645	13.1509	3855.8	FALSE	181
2022-09-15	11:22:07	3.26617	14.5286	3864.62	1	182
2022-09-15	11:22:07	3.11986	13.8778	3869.68	1	183
2022-09-15	11:22:08	3.11803	13.8696	3878.49	1	184
2022-09-15	11:22:08	2.63161	11.7059	3881.38	FALSE	184
2022-09-15	11:22:08	3.56032	15.837	3894.33	1	185
2022-09-15	11:22:08	2.5509	11.3469	3892.73	FALSE	185
2022-09-15	11:22:09	3.07548	13.6804	3908.01	1	186
2022-09-15	11:22:09	3.47843	15.4728	3908.2	1	187
2022-09-15	11:22:09	6.06785	26.991	3935	1	188
2022-09-15	11:22:10	6.42632	28.5856	3936.79	1	189
2022-09-15	11:22:10	14.6391	65.1176	4000.12	1	190
2022-09-15	11:22:10	9.32611	41.4844	3978.27	1	191
2022-09-15	11:22:10	11.4171	50.7855	4050.9	1	192
2022-09-15	11:22:11	5.75578	25.6029	4003.87	1	193
2022-09-15	11:22:11	7.03136	31.2769	4082.18	1	194
2022-09-15	11:22:11	8.72571	38.8137	4042.69	1	195
2022-09-15	11:22:11	7.50718	33.3934	4115.57	1	196
2022-09-15	11:22:12	10.589	47.102	4089.79	1	197
2022-09-15	11:22:12	8.82713	39.2648	4154.84	1	198
2022-09-15	11:22:12	10.0691	44.7894	4134.58	1	199
2022-09-15	11:22:12	7.82871	34.8237	4189.66	1	200
2022-09-15	11:22:13	15.2034	67.6278	4202.21	1	201
2022-09-15	11:22:13	13.7807	61.2993	4250.96	1	202
2022-09-15	11:22:13	11.9435	53.1271	4255.33	1	203
2022-09-15	11:22:14	11.0305	49.0659	4300.03	1	204
2022-09-15	11:22:14	5.24683	23.3389	4278.67	1	205
2022-09-15	11:22:14	7.36831	32.7757	4332.8	1	206
2022-09-15	11:22:14	1.79518	7.98532	4286.66	FALSE	206
2022-09-15	11:22:15	0.147138	0.654499	4333.46	FALSE	206
2022-09-15	11:22:15	-0.040445	-0.179907	4286.66	FALSE	206
2022-09-15	11:22:15	-0.0426842	-0.189868	4333.46	FALSE	206
2022-09-15	11:22:15	-0.113778	-0.506107	4286.66	FALSE	206
2022-09-15	11:22:16	0.145051	0.645216	4334.1	FALSE	206
2022-09-15	11:22:16	0.00179415	0.00798074	4286.67	FALSE	206
2022-09-15	11:22:16	0.00647607	0.0288069	4334.13	FALSE	206
2022-09-15	11:22:16	-0.0866537	-0.385453	4286.67	FALSE	206
2022-09-15	11:22:17	-0.0399361	-0.177644	4334.13	FALSE	206
2022-09-15	11:22:17	0.0434735	0.193379	4286.86	FALSE	206
2022-09-15	11:22:17	0.0326338	0.145162	4334.28	FALSE	206
2022-09-15	11:22:18	0.288054	1.28132	4288.14	FALSE	206
2022-09-15	11:22:18	0.42383	1.88528	4336.16	FALSE	206
2022-09-15	11:22:18	0.375026	1.66819	4289.81	FALSE	206
2022-09-15	11:22:18	0.23472	1.04408	4337.21	FALSE	206
2022-09-15	11:22:19	0.191769	0.853027	4290.66	FALSE	206
2022-09-15	11:22:19	-0.0039056	-0.0173729	4337.21	FALSE	206
2022-09-15	11:22:19	0.249326	1.10905	4291.77	FALSE	206
2022-09-15	11:22:20	0.0801656	0.356593	4337.56	FALSE	206
2022-09-15	11:22:20	0.0562979	0.250424	4292.02	FALSE	206
2022-09-15	11:22:20	0.151565	0.674191	4338.24	FALSE	206
2022-09-15	11:22:20	0.308919	1.37413	4293.4	FALSE	206
2022-09-15	11:22:20	0.51014	2.2692	4340.51	FALSE	206
2022-09-15	11:22:21	0.709173	3.15454	4296.55	FALSE	206
2022-09-15	11:22:21	0.10383	0.461857	4340.97	FALSE	206
2022-09-15	11:22:21	0.0499875	0.222354	4296.77	FALSE	206
2022-09-15	11:22:22	0.336908	1.49863	4342.47	FALSE	206
2022-09-15	11:22:22	0.180267	0.801864	4297.57	FALSE	206
2022-09-15	11:22:22	0.18042	0.802544	4343.27	FALSE	206
2022-09-15	11:22:22	0.0630155	0.280306	4297.85	FALSE	206
2022-09-15	11:22:23	0.132328	0.588621	4343.86	FALSE	206
2022-09-15	11:22:23	0.144491	0.642725	4298.5	FALSE	206
2022-09-15	11:22:23	0.0876465	0.389869	4344.25	FALSE	206
2022-09-15	11:22:23	0.0911071	0.405263	4298.9	FALSE	206
2022-09-15	11:22:24	0.0296822	0.132032	4344.38	FALSE	206
2022-09-15	11:22:24	-0.0122516	-0.0544976	4298.9	FALSE	206
2022-09-15	11:22:24	-0.0391728	-0.174248	4344.38	FALSE	206
2022-09-15	11:22:24	-0.0782567	-0.348101	4298.9	FALSE	206
2022-09-15	11:22:25	-0.0620735	-0.276115	4344.38	FALSE	206
2022-09-15	11:22:25	-0.103346	-0.459704	4298.9	FALSE	206
2022-09-15	11:22:25	0.0738552	0.328523	4344.71	FALSE	206
2022-09-15	11:22:26	0.0257636	0.114602	4299.02	FALSE	206
2022-09-15	11:22:26	0.175687	0.781491	4345.49	FALSE	206
2022-09-15	11:22:26	0.0500893	0.222807	4299.24	FALSE	206
2022-09-15	11:22:26	0.119453	0.531351	4346.02	FALSE	206
2022-09-15	11:22:27	0.152278	0.677363	4299.92	FALSE	206
2022-09-15	11:22:27	0.14556	0.64748	4346.67	FALSE	206
2022-09-15	11:22:27	0.149122	0.663324	4300.58	FALSE	206
2022-09-15	11:22:27	0.0004201	0.00186869	4346.67	FALSE	206
2022-09-15	11:22:28	0.201641	0.896939	4301.48	FALSE	206
2022-09-15	11:22:28	0.0918704	0.408658	4347.08	FALSE	206
2022-09-15	11:22:28	0.227036	1.0099	4302.49	FALSE	206
2022-09-15	11:22:28	0.22556	1.00334	4348.08	FALSE	206
2022-09-15	11:22:29	3.78083	16.8179	4319.31	1	207
2022-09-15	11:22:29	8.08958	35.9841	4384.07	1	208
2022-09-15	11:22:29	8.48026	37.7219	4357.03	1	209
2022-09-15	11:22:30	3.95808	17.6063	4401.67	1	210
2022-09-15	11:22:30	4.97283	22.1201	4379.15	1	211
2022-09-15	11:22:30	1.95548	8.69837	4410.37	FALSE	211
2022-09-15	11:22:30	4.58027	20.374	4399.52	1	212
2022-09-15	11:22:31	1.83304	8.15373	4418.52	FALSE	212
2022-09-15	11:22:31	3.67528	16.3484	4415.87	1	213
2022-09-15	11:22:31	2.63558	11.7236	4430.25	FALSE	213
2022-09-15	11:22:31	4.11665	18.3117	4434.18	1	214
2022-09-15	11:22:32	3.83584	17.0626	4447.31	1	215
2022-09-15	11:22:32	1.98663	8.83693	4443.02	FALSE	215
2022-09-15	11:22:32	3.61055	16.0604	4463.37	1	216
2022-09-15	11:22:32	2.59558	11.5457	4454.56	FALSE	216
2022-09-15	11:22:33	5.20861	23.1689	4486.54	1	217
2022-09-15	11:22:33	5.30423	23.5943	4478.16	1	218
2022-09-15	11:22:33	6.90663	30.7221	4517.26	1	219
2022-09-15	11:22:34	2.03187	9.03816	4487.2	FALSE	219
2022-09-15	11:22:34	4.78011	21.2629	4538.53	1	220
2022-09-15	11:22:34	3.2649	14.5229	4501.72	1	221
2022-09-15	11:22:34	2.41803	10.7559	4549.28	FALSE	221
2022-09-15	11:22:35	2.44113	10.8586	4512.58	FALSE	221
2022-09-15	11:22:35	1.39513	6.20582	4555.49	FALSE	221
2022-09-15	11:22:35	3.49945	15.5663	4528.14	1	222
2022-09-15	11:22:35	3.13625	13.9507	4569.44	1	223
2022-09-15	11:22:36	3.41813	15.2045	4543.35	1	224
2022-09-15	11:22:36	3.64098	16.1958	4585.63	1	225
2022-09-15	11:22:36	7.08006	31.4935	4574.84	1	226
2022-09-15	11:22:36	4.99278	22.2089	4607.84	1	227
2022-09-15	11:22:37	5.55833	24.7246	4599.57	1	228
2022-09-15	11:22:37	3.87818	17.2509	4625.09	1	229
2022-09-15	11:22:37	7.78337	34.622	4634.19	1	230
2022-09-15	11:22:38	3.67752	16.3583	4641.45	1	231
2022-09-15	11:22:38	5.6166	24.9838	4659.17	1	232
2022-09-15	11:22:38	3.23396	14.3853	4655.84	1	233
2022-09-15	11:22:38	9.87003	43.9039	4703.08	1	234
2022-09-15	11:22:39	4.05334	18.0301	4673.87	1	235
2022-09-15	11:22:39	6.58006	29.2694	4732.35	1	236
2022-09-15	11:22:39	3.37217	15.0001	4688.87	1	237
2022-09-15	11:22:39	7.49848	33.3547	4765.7	1	238
2022-09-15	11:22:40	3.54978	15.7901	4704.66	1	239
2022-09-15	11:22:40	4.05289	18.0281	4783.73	1	240
2022-09-15	11:22:40	0.930649	4.13971	4708.8	FALSE	240
2022-09-15	11:22:40	2.21452	9.85063	4793.58	FALSE	240
2022-09-15	11:22:41	0.563524	2.50667	4711.3	FALSE	240
2022-09-15	11:22:41	1.59574	7.09817	4800.68	FALSE	240
2022-09-15	11:22:41	0.560776	2.49444	4713.8	FALSE	240
2022-09-15	11:22:42	1.41721	6.30403	4806.98	FALSE	240
2022-09-15	11:22:42	1.42749	6.34976	4720.15	FALSE	240
2022-09-15	11:22:42	0.208359	0.926823	4807.91	FALSE	240
2022-09-15	11:22:42	0.875229	3.89319	4724.04	FALSE	240
2022-09-15	11:22:43	-0.216475	-0.962924	4807.91	FALSE	240
2022-09-15	11:22:43	0.669326	2.9773	4727.02	FALSE	240
2022-09-15	11:22:43	1.68917	7.51377	4815.42	FALSE	240
2022-09-15	11:22:43	-0.177392	-0.789075	4727.02	FALSE	240
2022-09-15	11:22:44	1.84337	8.19968	4823.62	FALSE	240
2022-09-15	11:22:44	4.92062	21.8879	4748.91	1	241
2022-09-15	11:22:44	4.87691	21.6935	4845.32	1	242
2022-09-15	11:22:44	2.64744	11.7763	4760.68	FALSE	242
2022-09-15	11:22:45	1.89935	8.44869	4853.76	FALSE	242
2022-09-15	11:22:45	5.02642	22.3585	4783.04	1	243
2022-09-15	11:22:45	4.38647	19.5119	4873.28	1	244
2022-09-15	11:22:46	6.29054	27.9816	4811.02	1	245
2022-09-15	11:22:46	3.39365	15.0956	4888.37	1	246
2022-09-15	11:22:46	6.81293	30.3053	4841.33	1	247
2022-09-15	11:22:46	6.3683	28.3275	4916.7	1	248
2022-09-15	11:22:47	4.08189	18.1571	4859.48	1	249
2022-09-15	11:22:47	1.96169	8.72599	4925.43	FALSE	249
2022-09-15	11:22:47	2.41457	10.7405	4870.23	FALSE	249
2022-09-15	11:22:47	1.34683	5.99097	4931.42	FALSE	249
2022-09-15	11:22:48	0.283779	1.26231	4871.49	FALSE	249
2022-09-15	11:22:48	0.132125	0.587718	4932	FALSE	249
2022-09-15	11:22:48	-0.0159667	-0.0710231	4871.49	FALSE	249
2022-09-15	11:22:48	1.15406	5.13349	4937.14	FALSE	249
2022-09-15	11:22:49	0.529478	2.35522	4873.84	FALSE	249
2022-09-15	11:22:49	0.824695	3.66841	4940.81	FALSE	249
2022-09-15	11:22:49	3.00826	13.3813	4887.22	1	250
2022-09-15	11:22:50	4.21106	18.7316	4959.54	1	251
2022-09-15	11:22:50	4.49446	19.9923	4907.22	1	252
2022-09-15	11:22:50	4.04418	17.9893	4977.53	1	253
2022-09-15	11:22:50	5.36555	23.867	4931.08	1	254
2022-09-15	11:22:51	5.8136	25.8601	5003.39	1	255
2022-09-15	11:22:51	5.32693	23.6953	4954.78	1	256
2022-09-15	11:22:51	1.91523	8.51933	5011.91	FALSE	256
2022-09-15	11:22:51	9.41604	41.8844	4996.66	1	257
2022-09-15	11:22:52	6.39803	28.4597	5040.37	1	258
2022-09-15	11:22:52	4.27161	19.001	5015.66	1	259
2022-09-15	11:22:52	2.37513	10.5651	5050.93	FALSE	259
2022-09-15	11:22:52	1.26454	5.62493	5021.29	FALSE	259
2022-09-15	11:22:53	5.60281	24.9224	5075.85	1	260
2022-09-15	11:22:53	4.69324	20.8765	5042.17	1	261
2022-09-15	11:22:53	7.87543	35.0315	5110.89	1	262
2022-09-15	11:22:54	3.39024	15.0805	5057.25	1	263
2022-09-15	11:22:54	7.6652	34.0963	5144.98	1	264
2022-09-15	11:22:54	7.38159	32.8348	5090.08	1	265
2022-09-15	11:22:54	5.95243	26.4776	5171.46	1	266
2022-09-15	11:22:55	7.12815	31.7074	5121.79	1	267
2022-09-15	11:22:55	4.34423	19.324	5190.78	1	268
2022-09-15	11:22:55	6.25304	27.8148	5149.6	1	269
2022-09-15	11:22:55	8.64372	38.449	5229.23	1	270
2022-09-15	11:22:56	6.46963	28.7782	5178.38	1	271
2022-09-15	11:22:56	9.14846	40.6942	5269.93	1	272
2022-09-15	11:22:56	11.1248	49.4853	5227.87	1	273
2022-09-15	11:22:56	8.00164	35.5929	5305.52	1	274
2022-09-15	11:22:57	16.3237	72.6111	5300.48	1	275
2022-09-15	11:22:57	15.0788	67.0735	5372.59	1	276
2022-09-15	11:22:57	11.177	49.7175	5350.2	1	277
2022-09-15	11:22:58	2.40098	10.68	5383.27	FALSE	277
2022-09-15	11:22:58	12.122	53.9211	5404.12	1	278
2022-09-15	11:22:58	22.6119	100.582	5483.85	1	279
2022-09-15	11:22:58	24.6436	109.62	5513.74	1	280
2022-09-15	11:22:59	7.76591	34.5443	5518.4	1	281
2022-09-15	11:22:59	5.14367	22.8801	5536.62	1	282
2022-09-15	11:22:59	9.56749	42.5581	5560.96	1	283
2022-09-15	11:22:59	7.63899	33.9798	5570.6	1	284
2022-09-15	11:23:00	4.34403	19.3231	5580.28	1	285
2022-09-15	11:23:00	5.32286	23.6771	5594.27	1	286
2022-09-15	11:23:00	6.60978	29.4016	5609.68	1	287
2022-09-15	11:23:00	12.5548	55.8463	5650.12	1	288
2022-09-15	11:23:01	13.9944	62.2499	5671.93	1	289
2022-09-15	11:23:01	16.41	72.995	5723.11	1	290
2022-09-15	11:23:01	12.9278	57.5054	5729.44	1	291
2022-09-15	11:23:02	14.4307	64.1906	5787.3	1	292
2022-09-15	11:23:02	13.181	58.6317	5788.07	1	293
2022-09-15	11:23:02	11.8085	52.5266	5839.83	1	294
2022-09-15	11:23:02	12.1151	53.8904	5841.96	1	295
2022-09-15	11:23:03	15.2961	68.0401	5907.87	1	296
2022-09-15	11:23:03	13.9436	62.0239	5903.98	1	297
2022-09-15	11:23:03	14.3714	63.9269	5971.8	1	298
2022-09-15	11:23:03	12.1027	53.8352	5957.82	1	299
2022-09-15	11:23:04	6.9965	31.1218	6002.92	1	300
2022-09-15	11:23:04	8.36337	37.2019	5995.02	1	301
2022-09-15	11:23:04	11.4527	50.9439	6053.86	1	302
2022-09-15	11:23:04	15.5715	69.2651	6064.29	1	303
2022-09-15	11:23:05	13.3208	59.2536	6113.12	1	304
2022-09-15	11:23:05	21.3901	95.1474	6159.43	1	305
2022-09-15	11:23:05	17.5537	78.0824	6191.2	1	306
2022-09-15	11:23:06	13.2111	58.7656	6218.2	1	307
2022-09-15	11:23:06	2.90693	12.9306	6204.13	FALSE	307
2022-09-15	11:23:06	5.89726	26.2322	6244.43	1	308
2022-09-15	11:23:06	5.48601	24.4029	6228.53	1	309
2022-09-15	11:23:07	6.04342	26.8823	6271.31	1	310
2022-09-15	11:23:07	14.802	65.8423	6294.38	1	311
2022-09-15	11:23:07	15.3319	68.1994	6339.51	1	312
2022-09-15	11:23:07	18.5217	82.3882	6376.76	1	313
2022-09-15	11:23:08	15.5666	69.2434	6408.76	1	314
2022-09-15	11:23:08	9.22311	41.0262	6417.79	1	315
2022-09-15	11:23:08	2.7823	12.3762	6421.13	FALSE	315
2022-09-15	11:23:08	2.09187	9.30506	6427.1	FALSE	315
2022-09-15	11:23:09	1.36912	6.09012	6427.22	FALSE	315
2022-09-15	11:23:09	0.990598	4.40638	6431.5	FALSE	315
2022-09-15	11:23:09	1.12709	5.01352	6432.24	FALSE	315
2022-09-15	11:23:10	0.778181	3.4615	6434.96	FALSE	315
2022-09-15	11:23:10	0.917875	4.08289	6436.32	FALSE	315
2022-09-15	11:23:10	1.0594	4.71242	6439.68	FALSE	315
2022-09-15	11:23:10	0.595331	2.64815	6438.97	FALSE	315
2022-09-15	11:23:11	0.452634	2.01341	6441.69	FALSE	315
2022-09-15	11:23:11	0.398181	1.77119	6440.74	FALSE	315
2022-09-15	11:23:11	0.441132	1.96224	6443.65	FALSE	315
2022-09-15	11:23:11	0.441336	1.96315	6442.7	FALSE	315
2022-09-15	11:23:12	0.469835	2.08992	6445.74	FALSE	315
2022-09-15	11:23:12	0.670038	2.98046	6445.68	FALSE	315
2022-09-15	11:23:12	1.12052	4.9843	6450.73	FALSE	315
2022-09-15	11:23:12	1.48795	6.6187	6452.3	FALSE	315
2022-09-15	11:23:13	0.96271	4.28233	6455.01	FALSE	315
2022-09-15	11:23:13	1.22296	5.43997	6457.74	FALSE	315
2022-09-15	11:23:13	1.16734	5.19256	6460.2	FALSE	315
2022-09-15	11:23:14	1.08139	4.81024	6462.55	FALSE	315
2022-09-15	11:23:14	1.20037	5.33949	6465.54	FALSE	315
2022-09-15	11:23:14	0.776145	3.45245	6466	FALSE	315
2022-09-15	11:23:14	0.298537	1.32795	6466.87	FALSE	315
2022-09-15	11:23:15	0.00459311	0.0204311	6466.02	FALSE	315
2022-09-15	11:23:15	-0.110369	-0.490943	6466.87	FALSE	315
2022-09-15	11:23:15	-0.209809	-0.933272	6466.02	FALSE	315
2022-09-15	11:23:15	-0.3922	-1.74458	6466.87	FALSE	315
2022-09-15	11:23:16	-0.32818	-1.45981	6466.02	FALSE	315
2022-09-15	11:23:16	-0.569249	-2.53213	6466.87	FALSE	315
2022-09-15	11:23:16	-1.26681	-5.63502	6466.02	FALSE	315
2022-09-15	11:23:16	-0.17388	-0.773453	6466.87	FALSE	315
2022-09-15	11:23:17	0.249529	1.10995	6467.13	FALSE	315
2022-09-15	11:23:17	1.34693	5.99141	6472.86	FALSE	315
2022-09-15	11:23:17	5.86652	26.0955	6493.23	1	316
2022-09-15	11:23:18	12.9691	57.6892	6530.55	1	317
2022-09-15	11:23:18	10.1021	44.9362	6538.17	1	318
2022-09-15	11:23:18	13.1597	58.537	6589.09	1	319
2022-09-15	11:23:18	9.7082	43.184	6581.35	1	320
2022-09-15	11:23:19	19.7426	87.819	6676.9	1	321
2022-09-15	11:23:19	19.8362	88.2354	6669.58	1	322
2022-09-15	11:23:19	8.43217	37.508	6714.41	1	323
2022-09-15	11:23:19	8.27441	36.8062	6706.39	1	324
2022-09-15	11:23:20	0.834466	3.71187	6718.12	FALSE	324
2022-09-15	11:23:20	3.15233	14.0222	6720.41	1	325
2022-09-15	11:23:20	5.06464	22.5285	6740.65	1	326
2022-09-15	11:23:20	6.08138	27.0512	6747.46	1	327
2022-09-15	11:23:21	10.7255	47.7092	6788.36	1	328
2022-09-15	11:23:21	8.94215	39.7765	6787.24	1	329
2022-09-15	11:23:21	7.92652	35.2587	6823.62	1	330
2022-09-15	11:23:22	9.84734	43.8029	6831.04	1	331
2022-09-15	11:23:22	8.9026	39.6005	6863.22	1	332
2022-09-15	11:23:22	3.89263	17.3152	6848.36	1	333
2022-09-15	11:23:22	2.06088	9.16721	6872.39	FALSE	333
2022-09-15	11:23:23	0.862812	3.83796	6852.2	FALSE	333
2022-09-15	11:23:23	1.12057	4.98452	6877.37	FALSE	333
2022-09-15	11:23:23	0.798639	3.55251	6855.75	FALSE	333
2022-09-15	11:23:23	1.15253	5.12668	6882.5	FALSE	333
2022-09-15	11:23:24	2.2221	9.88435	6865.63	FALSE	333
2022-09-15	11:23:24	6.20652	27.6078	6910.11	1	334
2022-09-15	11:23:24	6.90332	30.7073	6896.34	1	335
2022-09-15	11:23:24	2.62469	11.6751	6921.78	FALSE	335
2022-09-15	11:23:25	1.81762	8.08514	6904.43	FALSE	335
2022-09-15	11:23:25	1.29788	5.77323	6927.56	FALSE	335
2022-09-15	11:23:25	1.32322	5.88595	6910.31	FALSE	335
2022-09-15	11:23:26	1.0879	4.8392	6932.4	FALSE	335
2022-09-15	11:23:26	2.25635	10.0367	6920.35	FALSE	335
2022-09-15	11:23:26	1.82388	8.11298	6940.51	FALSE	335
2022-09-15	11:23:26	3.06586	13.6376	6933.99	1	336
2022-09-15	11:23:27	1.59207	7.08185	6947.59	FALSE	336
2022-09-15	11:23:27	2.99843	13.3376	6947.32	FALSE	336
2022-09-15	11:23:27	1.79391	7.97967	6955.57	FALSE	336
2022-09-15	11:23:27	3.30159	14.6861	6962.01	1	337
2022-09-15	11:23:28	3.44347	15.3172	6970.89	1	338
2022-09-15	11:23:28	3.53523	15.7254	6977.74	1	339
2022-09-15	11:23:28	1.95752	8.70744	6979.59	FALSE	339
2022-09-15	11:23:29	1.29192	5.74672	6983.48	FALSE	339
2022-09-15	11:23:29	0.603473	2.68437	6982.28	FALSE	339
2022-09-15	11:23:29	0.451565	2.00865	6985.49	FALSE	339
2022-09-15	11:23:29	0.389377	1.73203	6984.01	FALSE	339
2022-09-15	11:23:30	0.445662	1.98239	6987.47	FALSE	339
2022-09-15	11:23:30	0.931361	4.14288	6988.15	FALSE	339
2022-09-15	11:23:30	0.685204	3.04792	6990.52	FALSE	339
2022-09-15	11:23:30	1.05406	4.68867	6992.84	FALSE	339
2022-09-15	11:23:31	1.02729	4.56959	6995.09	FALSE	339
2022-09-15	11:23:31	1.62368	7.22245	7000.06	FALSE	339
2022-09-15	11:23:31	1.68139	7.47916	7002.57	FALSE	339
2022-09-15	11:23:31	3.56744	15.8687	7015.93	1	340
2022-09-15	11:23:32	1.74724	7.77207	7010.34	FALSE	340
2022-09-15	11:23:32	1.71411	7.6247	7023.56	FALSE	340
2022-09-15	11:23:32	0.860776	3.8289	7014.17	FALSE	340
2022-09-15	11:23:32	0.610649	2.71629	7026.27	FALSE	340
2022-09-15	11:23:33	0.146934	0.653592	7014.82	FALSE	340
2022-09-15	11:23:33	0.525916	2.33938	7028.61	FALSE	340
2022-09-15	11:23:33	0.572837	2.54809	7017.37	FALSE	340
2022-09-15	11:23:34	0.721946	3.21136	7031.83	FALSE	340
2022-09-15	11:23:34	0.656908	2.92206	7020.29	FALSE	340
2022-09-15	11:23:34	0.0769595	0.342331	7032.17	FALSE	340
2022-09-15	11:23:34	-0.165839	-0.737685	7020.29	FALSE	340
2022-09-15	11:23:35	-0.135152	-0.601183	7032.17	FALSE	340
2022-09-15	11:23:35	-0.208995	-0.929652	7020.29	FALSE	340
2022-09-15	11:23:35	0.343982	1.5301	7033.7	FALSE	340
2022-09-15	11:23:35	0.296654	1.31958	7021.61	FALSE	340
2022-09-15	11:23:36	-0.0359667	-0.159987	7033.7	FALSE	340
2022-09-15	11:23:36	-0.325381	-1.44736	7021.61	FALSE	340
2022-09-15	11:23:36	1.13986	5.07033	7038.77	FALSE	340
2022-09-15	11:23:37	0.697723	3.10361	7024.72	FALSE	340
2022-09-15	11:23:37	0.811463	3.60955	7042.38	FALSE	340
2022-09-15	11:23:37	0.593244	2.63887	7027.36	FALSE	340
2022-09-15	11:23:37	0.59528	2.64792	7045.03	FALSE	340

## Sheet: Tyr_star_2022915111828 (2)
Date	Time	Lbs	Total force x time			**GoPro Fitting: 1108
2022-09-15	11:18:29	-0.0975951	0	FALSE	0
2022-09-15	11:18:29	0.0984862	0.0984862	FALSE	0
2022-09-15	11:18:29	0.147036	0.245522	FALSE	0
2022-09-15	11:18:29	0.151209	0.396731	FALSE	0
2022-09-15	11:18:30	0.18098	0.577711	FALSE	0
2022-09-15	11:18:30	0.214568	0.792279	FALSE	0
2022-09-15	11:18:30	0.205764	0.998043	FALSE	0
2022-09-15	11:18:30	0.258384	1.25643	FALSE	0
2022-09-15	11:18:31	0.229428	1.48586	FALSE	0
2022-09-15	11:18:31	0.343423	1.82928	FALSE	0
2022-09-15	11:18:31	0.291514	2.12079	FALSE	0
2022-09-15	11:18:32	0.406883	2.52768	FALSE	0
2022-09-15	11:18:32	0.272532	2.80021	FALSE	0
2022-09-15	11:18:32	0.208461	3.00867	FALSE	0
2022-09-15	11:18:32	0.255484	3.26415	FALSE	0
2022-09-15	11:18:33	0.270344	3.5345	FALSE	0
2022-09-15	11:18:33	0.22215	3.75665	FALSE	0
2022-09-15	11:18:33	0.222812	3.97946	FALSE	0
2022-09-15	11:18:33	0.252277	4.23174	FALSE	0
2022-09-15	11:18:34	0.238588	4.47032	FALSE	0
2022-09-15	11:18:34	0.263626	4.73395	FALSE	0
2022-09-15	11:18:34	0.262506	4.99646	FALSE	0
2022-09-15	11:18:34	0.25411	5.25057	FALSE	0
2022-09-15	11:18:35	0.26388	5.51445	FALSE	0
2022-09-15	11:18:35	0.266629	5.78107	FALSE	0
2022-09-15	11:18:35	0.27355	6.05462	FALSE	0
2022-09-15	11:18:36	0.265611	6.32024	FALSE	0
2022-09-15	11:18:36	0.260827	6.58106	FALSE	0
2022-09-15	11:18:36	0.269173	6.85024	FALSE	0
2022-09-15	11:18:36	0.264186	7.11442	FALSE	0
2022-09-15	11:18:37	0.274618	7.38904	FALSE	0
2022-09-15	11:18:37	0.285865	7.6749	FALSE	0
2022-09-15	11:18:37	0.248003	7.92291	FALSE	0
2022-09-15	11:18:37	0.268155	8.19106	FALSE	0
2022-09-15	11:18:38	0.326221	8.51728	FALSE	0
2022-09-15	11:18:38	0.296349	8.81363	FALSE	0
2022-09-15	11:18:38	0.311972	9.1256	FALSE	0
2022-09-15	11:18:39	0.292532	9.41814	FALSE	0
2022-09-15	11:18:39	0.304746	9.72288	FALSE	0
2022-09-15	11:18:39	0.305407	10.0283	FALSE	0
2022-09-15	11:18:39	0.281896	10.3102	FALSE	0
2022-09-15	11:18:40	0.30154	10.6117	FALSE	0
2022-09-15	11:18:40	0.330445	10.9422	FALSE	0
2022-09-15	11:18:40	0.261031	11.2032	FALSE	0
2022-09-15	11:18:40	0.3193	11.5225	FALSE	0
2022-09-15	11:18:41	0.390445	11.9129	FALSE	0
2022-09-15	11:18:41	0.461692	12.3746	FALSE	0
2022-09-15	11:18:41	1.12261	13.4972	FALSE	0
2022-09-15	11:18:41	1.10541	14.6027	FALSE	0
2022-09-15	11:18:42	1.62312	16.2258	FALSE	0
2022-09-15	11:18:42	0.833651	17.0594	FALSE	0
2022-09-15	11:18:42	0.489326	17.5488	FALSE	0
2022-09-15	11:18:43	0.34098	17.8897	FALSE	0
2022-09-15	11:18:43	0.672023	18.5618	FALSE	0
2022-09-15	11:18:43	0.669326	19.2311	FALSE	0
2022-09-15	11:18:43	0.653906	19.885	FALSE	0
2022-09-15	11:18:44	1.09182	20.9768	FALSE	0
2022-09-15	11:18:44	1.94413	22.9209	FALSE	0
2022-09-15	11:18:44	1.69447	24.6154	FALSE	0
2022-09-15	11:18:44	1.14958	25.765	FALSE	0
2022-09-15	11:18:45	1.43757	27.2026	FALSE	0
2022-09-15	11:18:45	1.15457	28.3571	FALSE	0
2022-09-15	11:18:45	2.93523	31.2924	FALSE	0
2022-09-15	11:18:45	2.86118	34.1535	FALSE	0
2022-09-15	11:18:46	1.18581	35.3394	FALSE	0
2022-09-15	11:18:46	1.07436	36.4137	FALSE	0
2022-09-15	11:18:46	1.8108	38.2245	FALSE	0
2022-09-15	11:18:47	4.13151	42.356	1	1
2022-09-15	11:18:47	5.27711	47.6331	1	2
2022-09-15	11:18:47	7.32113	54.9543	1	3
2022-09-15	11:18:47	4.45411	59.4084	1	4
2022-09-15	11:18:48	2.74658	62.155	FALSE	4
2022-09-15	11:18:48	4.9139	67.0689	1	5
2022-09-15	11:18:48	2.82296	69.8918	FALSE	5
2022-09-15	11:18:48	3.44688	73.3387	1	6
2022-09-15	11:18:49	2.66469	76.0034	FALSE	6
2022-09-15	11:18:49	3.45594	79.4593	1	7
2022-09-15	11:18:49	8.77721	88.2365	1	8
2022-09-15	11:18:49	6.06037	94.2969	1	9
2022-09-15	11:18:50	12.9147	107.212	1	10
2022-09-15	11:18:50	7.26937	114.481	1	11
2022-09-15	11:18:50	2.27966	116.761	FALSE	11
2022-09-15	11:18:51	3.29441	120.055	1	12
2022-09-15	11:18:51	2.73925	122.794	FALSE	12
2022-09-15	11:18:51	4.12586	126.92	1	13
2022-09-15	11:18:51	3.04958	129.97	1	14
2022-09-15	11:18:52	5.00515	134.975	1	15
2022-09-15	11:18:52	6.93914	141.914	1	16
2022-09-15	11:18:52	1.93986	143.854	FALSE	16
2022-09-15	11:18:52	1.51075	145.365	FALSE	16
2022-09-15	11:18:53	1.3277	146.692	FALSE	16
2022-09-15	11:18:53	0.61528	147.308	FALSE	16
2022-09-15	11:18:53	0.409377	147.717	FALSE	16
2022-09-15	11:18:53	0.521692	148.239	FALSE	16
2022-09-15	11:18:54	0.536043	148.775	FALSE	16
2022-09-15	11:18:54	0.231921	149.007	FALSE	16
2022-09-15	11:18:54	2.02836	151.035	FALSE	16
2022-09-15	11:18:55	6.56322	157.598	1	17
2022-09-15	11:18:55	5.16317	162.761	1	18
2022-09-15	11:18:55	4.6934	167.455	1	19
2022-09-15	11:18:55	3.54617	171.001	1	20
2022-09-15	11:18:56	8.06505	179.066	1	21
2022-09-15	11:18:56	5.95273	185.019	1	22
2022-09-15	11:18:56	10.1897	195.208	1	23
2022-09-15	11:18:56	17.802	213.01	1	24
2022-09-15	11:18:57	7.47853	220.489	1	25
2022-09-15	11:18:57	16.571	237.06	1	26
2022-09-15	11:18:57	11.7821	248.842	1	27
2022-09-15	11:18:57	15.062	263.904	1	28
2022-09-15	11:18:58	23.5241	287.428	1	29
2022-09-15	11:18:58	8.34449	295.773	1	30
2022-09-15	11:18:58	9.23075	305.003	1	31
2022-09-15	11:18:59	3.69146	308.695	1	32
2022-09-15	11:18:59	1.71726	310.412	FALSE	32
2022-09-15	11:18:59	0.632888	311.045	FALSE	32
2022-09-15	11:18:59	0.295484	311.341	FALSE	32
2022-09-15	11:19:00	0.567392	311.908	FALSE	32
2022-09-15	11:19:00	0.173092	312.081	FALSE	32
2022-09-15	11:19:00	0.398181	312.479	FALSE	32
2022-09-15	11:19:00	0.317366	312.797	FALSE	32
2022-09-15	11:19:01	0.393499	313.19	FALSE	32
2022-09-15	11:19:01	0.275891	313.466	FALSE	32
2022-09-15	11:19:01	0.377672	313.844	FALSE	32
2022-09-15	11:19:01	0.420318	314.264	FALSE	32
2022-09-15	11:19:02	0.635127	314.899	FALSE	32
2022-09-15	11:19:02	1.84948	316.749	FALSE	32
2022-09-15	11:19:02	1.99314	318.742	FALSE	32
2022-09-15	11:19:03	1.64337	320.385	FALSE	32
2022-09-15	11:19:03	0.856094	321.241	FALSE	32
2022-09-15	11:19:03	0.866628	322.108	FALSE	32
2022-09-15	11:19:03	0.248512	322.356	FALSE	32
2022-09-15	11:19:04	0.261641	322.618	FALSE	32
2022-09-15	11:19:04	0.226221	322.844	FALSE	32
2022-09-15	11:19:04	-0.0572898	322.844	FALSE	32
2022-09-15	11:19:04	0.0671885	322.911	FALSE	32
2022-09-15	11:19:05	0.221896	323.133	FALSE	32
2022-09-15	11:19:05	0.612888	323.746	FALSE	32
2022-09-15	11:19:05	0.894822	324.641	FALSE	32
2022-09-15	11:19:06	0.849987	325.491	FALSE	32
2022-09-15	11:19:06	0.866781	326.358	FALSE	32
2022-09-15	11:19:06	1.4335	327.791	FALSE	32
2022-09-15	11:19:06	0.561896	328.353	FALSE	32
2022-09-15	11:19:07	0.270191	328.623	FALSE	32
2022-09-15	11:19:07	0.15528	328.779	FALSE	32
2022-09-15	11:19:07	0.0194023	328.798	FALSE	32
2022-09-15	11:19:07	0.230242	329.028	FALSE	32
2022-09-15	11:19:08	0.32215	329.35	FALSE	32
2022-09-15	11:19:08	1.40739	330.758	FALSE	32
2022-09-15	11:19:08	2.33365	333.091	FALSE	32
2022-09-15	11:19:08	3.51457	336.606	1	33
2022-09-15	11:19:09	3.88591	340.492	1	34
2022-09-15	11:19:09	1.9251	342.417	FALSE	34
2022-09-15	11:19:09	1.96266	344.38	FALSE	34
2022-09-15	11:19:10	1.72749	346.107	FALSE	34
2022-09-15	11:19:10	3.29075	349.398	1	35
2022-09-15	11:19:10	3.91299	353.311	1	36
2022-09-15	11:19:10	9.72199	363.033	1	37
2022-09-15	11:19:11	8.71268	371.746	1	38
2022-09-15	11:19:11	3.81869	375.564	1	39
2022-09-15	11:19:11	4.42408	379.988	1	40
2022-09-15	11:19:11	5.63238	385.621	1	41
2022-09-15	11:19:12	6.92663	392.547	1	42
2022-09-15	11:19:12	3.85228	396.4	1	43
2022-09-15	11:19:12	2.4394	398.839	FALSE	43
2022-09-15	11:19:12	3.40627	402.245	1	44
2022-09-15	11:19:13	1.70973	403.955	FALSE	44
2022-09-15	11:19:13	1.33559	405.291	FALSE	44
2022-09-15	11:19:13	0.629427	405.92	FALSE	44
2022-09-15	11:19:14	0.778537	406.699	FALSE	44
2022-09-15	11:19:14	0.465255	407.164	FALSE	44
2022-09-15	11:19:14	0.669733	407.834	FALSE	44
2022-09-15	11:19:14	0.72383	408.557	FALSE	44
2022-09-15	11:19:15	1.27406	409.831	FALSE	44
2022-09-15	11:19:15	0.68271	410.514	FALSE	44
2022-09-15	11:19:15	1.07324	411.587	FALSE	44
2022-09-15	11:19:15	0.357519	411.945	FALSE	44
2022-09-15	11:19:16	0.48897	412.434	FALSE	44
2022-09-15	11:19:16	0.360267	412.794	FALSE	44
2022-09-15	11:19:16	0.356756	413.151	FALSE	44
2022-09-15	11:19:16	0.324593	413.475	FALSE	44
2022-09-15	11:19:17	0.333041	413.809	FALSE	44
2022-09-15	11:19:17	0.521336	414.33	FALSE	44
2022-09-15	11:19:17	0.527086	414.857	FALSE	44
2022-09-15	11:19:18	0.588461	415.445	FALSE	44
2022-09-15	11:19:18	1.52683	416.972	FALSE	44
2022-09-15	11:19:18	2.29004	419.262	FALSE	44
2022-09-15	11:19:18	3.7937	423.056	1	45
2022-09-15	11:19:19	2.06724	425.123	FALSE	45
2022-09-15	11:19:19	1.13854	426.262	FALSE	45
2022-09-15	11:19:19	0.587443	426.849	FALSE	45
2022-09-15	11:19:19	0.60958	427.459	FALSE	45
2022-09-15	11:19:20	0.365662	427.824	FALSE	45
2022-09-15	11:19:20	0.445	428.269	FALSE	45
2022-09-15	11:19:20	0.249529	428.519	FALSE	45
2022-09-15	11:19:20	0.40958	428.929	FALSE	45
2022-09-15	11:19:21	0.335942	429.264	FALSE	45
2022-09-15	11:19:21	0.288817	429.553	FALSE	45
2022-09-15	11:19:21	0.163015	429.716	FALSE	45
2022-09-15	11:19:22	-0.30019	429.716	FALSE	45
2022-09-15	11:19:22	-0.299682	429.716	FALSE	45
2022-09-15	11:19:22	-0.434949	429.716	FALSE	45
2022-09-15	11:19:22	-0.399071	429.716	FALSE	45
2022-09-15	11:19:23	-0.554491	429.716	FALSE	45
2022-09-15	11:19:23	-0.528689	429.716	FALSE	45
2022-09-15	11:19:23	-0.532659	429.716	FALSE	45
2022-09-15	11:19:23	-0.353473	429.716	FALSE	45
2022-09-15	11:19:24	0.0236262	429.74	FALSE	45
2022-09-15	11:19:24	1.23324	430.973	FALSE	45
2022-09-15	11:19:24	2.36205	433.335	FALSE	45
2022-09-15	11:19:24	2.15579	435.491	FALSE	45
2022-09-15	11:19:25	2.71116	438.202	FALSE	45
2022-09-15	11:19:25	1.72413	439.926	FALSE	45
2022-09-15	11:19:25	1.48434	441.411	FALSE	45
2022-09-15	11:19:26	4.05563	445.466	1	46
2022-09-15	11:19:26	2.08388	447.55	FALSE	46
2022-09-15	11:19:26	3.88678	451.437	1	47
2022-09-15	11:19:26	4.74668	456.184	1	48
2022-09-15	11:19:27	3.75889	459.943	1	49
2022-09-15	11:19:27	2.70678	462.649	FALSE	49
2022-09-15	11:19:27	1.01691	463.666	FALSE	49
2022-09-15	11:19:27	3.50261	467.169	1	50
2022-09-15	11:19:28	1.8078	468.977	FALSE	50
2022-09-15	11:19:28	2.01645	470.993	FALSE	50
2022-09-15	11:19:28	3.58648	474.58	1	51
2022-09-15	11:19:28	2.25543	476.835	FALSE	51
2022-09-15	11:19:29	1.98169	478.817	FALSE	51
2022-09-15	11:19:29	1.46108	480.278	FALSE	51
2022-09-15	11:19:29	1.72617	482.004	FALSE	51
2022-09-15	11:19:30	1.66994	483.674	FALSE	51
2022-09-15	11:19:30	0.628511	484.302	FALSE	51
2022-09-15	11:19:30	0.292532	484.595	FALSE	51
2022-09-15	11:19:30	0.70785	485.303	FALSE	51
2022-09-15	11:19:31	0.244593	485.547	FALSE	51
2022-09-15	11:19:31	0.178232	485.726	FALSE	51
2022-09-15	11:19:31	0.299911	486.025	FALSE	51
2022-09-15	11:19:31	0.201845	486.227	FALSE	51
2022-09-15	11:19:32	0.166629	486.394	FALSE	51
2022-09-15	11:19:32	0.288715	486.683	FALSE	51
2022-09-15	11:19:32	0.287239	486.97	FALSE	51
2022-09-15	11:19:32	0.412379	487.382	FALSE	51
2022-09-15	11:19:33	0.278842	487.661	FALSE	51
2022-09-15	11:19:33	0.746578	488.408	FALSE	51
2022-09-15	11:19:33	0.517926	488.926	FALSE	51
2022-09-15	11:19:34	0.985611	489.911	FALSE	51
2022-09-15	11:19:34	1.84816	491.759	FALSE	51
2022-09-15	11:19:34	1.17859	492.938	FALSE	51
2022-09-15	11:19:34	1.29365	494.232	FALSE	51
2022-09-15	11:19:35	0.499758	494.731	FALSE	51
2022-09-15	11:19:35	1.13838	495.87	FALSE	51
2022-09-15	11:19:35	1.67141	497.541	FALSE	51
2022-09-15	11:19:35	1.08571	498.627	FALSE	51
2022-09-15	11:19:36	1.50098	500.128	FALSE	51
2022-09-15	11:19:36	1.09503	501.223	FALSE	51
2022-09-15	11:19:36	1.52123	502.744	FALSE	51
2022-09-15	11:19:36	0.871972	503.616	FALSE	51
2022-09-15	11:19:37	1.70093	505.317	FALSE	51
2022-09-15	11:19:37	1.3392	506.656	FALSE	51
2022-09-15	11:19:37	1.36032	508.017	FALSE	51
2022-09-15	11:19:38	0.26612	508.283	FALSE	51
2022-09-15	11:19:38	0.425254	508.708	FALSE	51
2022-09-15	11:19:38	0.357723	509.066	FALSE	51
2022-09-15	11:19:38	0.543168	509.609	FALSE	51
2022-09-15	11:19:39	0.607951	510.217	FALSE	51
2022-09-15	11:19:39	0.52897	510.746	FALSE	51
2022-09-15	11:19:39	0.538588	511.284	FALSE	51
2022-09-15	11:19:39	0.474873	511.759	FALSE	51
2022-09-15	11:19:40	0.387748	512.147	FALSE	51
2022-09-15	11:19:40	0.396909	512.544	FALSE	51
2022-09-15	11:19:40	0.241234	512.785	FALSE	51
2022-09-15	11:19:41	0.109122	512.894	FALSE	51
2022-09-15	11:19:41	0.2364	513.131	FALSE	51
2022-09-15	11:19:41	0.247697	513.378	FALSE	51
2022-09-15	11:19:41	0.0635244	513.442	FALSE	51
2022-09-15	11:19:42	0.175687	513.618	FALSE	51
2022-09-15	11:19:42	0.199809	513.817	FALSE	51
2022-09-15	11:19:42	0.183219	514.001	FALSE	51
2022-09-15	11:19:42	0.774568	514.775	FALSE	51
2022-09-15	11:19:43	1.86291	516.638	FALSE	51
2022-09-15	11:19:43	9.30159	525.94	1	52
2022-09-15	11:19:43	5.02978	530.969	1	53
2022-09-15	11:19:43	5.66372	536.633	1	54
2022-09-15	11:19:44	1.87508	538.508	FALSE	54
2022-09-15	11:19:44	2.31462	540.823	FALSE	54
2022-09-15	11:19:44	2.51889	543.342	FALSE	54
2022-09-15	11:19:45	0.896298	544.238	FALSE	54
2022-09-15	11:19:45	0.911463	545.149	FALSE	54
2022-09-15	11:19:45	0.310191	545.46	FALSE	54
2022-09-15	11:19:45	0.899351	546.359	FALSE	54
2022-09-15	11:19:46	1.17024	547.529	FALSE	54
2022-09-15	11:19:46	3.86195	551.391	1	55
2022-09-15	11:19:46	8.43675	559.828	1	56
2022-09-15	11:19:46	4.57512	564.403	1	57
2022-09-15	11:19:47	4.15691	568.56	1	58
2022-09-15	11:19:47	3.05258	571.613	1	59
2022-09-15	11:19:47	1.2509	572.863	FALSE	59
2022-09-15	11:19:47	2.03411	574.898	FALSE	59
2022-09-15	11:19:48	1.9166	576.814	FALSE	59
2022-09-15	11:19:48	2.62592	579.44	FALSE	59
2022-09-15	11:19:48	3.52398	582.964	1	60
2022-09-15	11:19:49	3.31151	586.276	1	61
2022-09-15	11:19:49	3.74022	590.016	1	62
2022-09-15	11:19:49	2.69996	592.716	FALSE	62
2022-09-15	11:19:49	4.22907	596.945	1	63
2022-09-15	11:19:50	2.85747	599.802	FALSE	63
2022-09-15	11:19:50	2.94698	602.749	FALSE	63
2022-09-15	11:19:50	2.5479	605.297	FALSE	63
2022-09-15	11:19:50	2.09111	607.388	FALSE	63
2022-09-15	11:19:51	2.11915	609.507	FALSE	63
2022-09-15	11:19:51	1.63126	611.139	FALSE	63
2022-09-15	11:19:51	0.954924	612.094	FALSE	63
2022-09-15	11:19:51	0.584949	612.679	FALSE	63
2022-09-15	11:19:52	0.3164	612.995	FALSE	63
2022-09-15	11:19:52	0.655382	613.65	FALSE	63
2022-09-15	11:19:52	0.207392	613.858	FALSE	63
2022-09-15	11:19:53	0.333957	614.192	FALSE	63
2022-09-15	11:19:53	0.0950766	614.287	FALSE	63
2022-09-15	11:19:53	0.22042	614.507	FALSE	63
2022-09-15	11:19:53	0.13869	614.646	FALSE	63
2022-09-15	11:19:54	0.268766	614.915	FALSE	63
2022-09-15	11:19:54	0.0678501	614.983	FALSE	63
2022-09-15	11:19:54	0.231412	615.214	FALSE	63
2022-09-15	11:19:54	0.234211	615.448	FALSE	63
2022-09-15	11:19:55	0.116451	615.565	FALSE	63
2022-09-15	11:19:55	0.31416	615.879	FALSE	63
2022-09-15	11:19:55	0.266629	616.145	FALSE	63
2022-09-15	11:19:55	0.432837	616.578	FALSE	63
2022-09-15	11:19:56	0.25757	616.836	FALSE	63
2022-09-15	11:19:56	0.419199	617.255	FALSE	63
2022-09-15	11:19:56	0.356603	617.612	FALSE	63
2022-09-15	11:19:57	0.456501	618.068	FALSE	63
2022-09-15	11:19:57	0.393448	618.462	FALSE	63
2022-09-15	11:19:57	0.240064	618.702	FALSE	63
2022-09-15	11:19:57	0.315789	619.017	FALSE	63
2022-09-15	11:19:58	0.220267	619.238	FALSE	63
2022-09-15	11:19:58	0.380013	619.618	FALSE	63
2022-09-15	11:19:58	0.0925829	619.71	FALSE	63
2022-09-15	11:19:58	0.208919	619.919	FALSE	63
2022-09-15	11:19:59	0.179962	620.099	FALSE	63
2022-09-15	11:19:59	0.324288	620.423	FALSE	63
2022-09-15	11:19:59	0.138537	620.562	FALSE	63
2022-09-15	11:19:59	0.235636	620.798	FALSE	63
2022-09-15	11:20:00	0.375484	621.173	FALSE	63
2022-09-15	11:20:00	0.0732445	621.246	FALSE	63
2022-09-15	11:20:00	0.325967	621.572	FALSE	63
2022-09-15	11:20:01	0.170649	621.743	FALSE	63
2022-09-15	11:20:01	0.246985	621.99	FALSE	63
2022-09-15	11:20:01	0.194975	622.185	FALSE	63
2022-09-15	11:20:01	0.222252	622.407	FALSE	63
2022-09-15	11:20:02	0.560929	622.968	FALSE	63
2022-09-15	11:20:02	0.80215	623.77	FALSE	63
2022-09-15	11:20:02	2.67986	626.45	FALSE	63
2022-09-15	11:20:02	6.33894	632.789	1	64
2022-09-15	11:20:03	8.24937	641.038	1	65
2022-09-15	11:20:03	4.71981	645.758	1	66
2022-09-15	11:20:03	3.97533	649.734	1	67
2022-09-15	11:20:03	2.01711	651.751	FALSE	67
2022-09-15	11:20:04	0.278792	652.029	FALSE	67
2022-09-15	11:20:04	0.840623	652.87	FALSE	67
2022-09-15	11:20:04	1.55436	654.424	FALSE	67
2022-09-15	11:20:05	6.13721	660.562	1	68
2022-09-15	11:20:05	12.1089	672.671	1	69
2022-09-15	11:20:05	18.5966	691.267	1	70
2022-09-15	11:20:05	19.0466	710.314	1	71
2022-09-15	11:20:06	2.96296	713.277	FALSE	71
2022-09-15	11:20:06	4.90632	718.183	1	72
2022-09-15	11:20:06	1.7708	719.954	FALSE	72
2022-09-15	11:20:06	11.7027	731.657	1	73
2022-09-15	11:20:07	3.04912	734.706	1	74
2022-09-15	11:20:07	2.9853	737.691	FALSE	74
2022-09-15	11:20:07	5.23421	742.925	1	75
2022-09-15	11:20:07	10.0168	752.942	1	76
2022-09-15	11:20:08	18.2244	771.166	1	77
2022-09-15	11:20:08	4.06825	775.235	1	78
2022-09-15	11:20:08	0.85243	776.087	FALSE	78
2022-09-15	11:20:09	0.283422	776.37	FALSE	78
2022-09-15	11:20:09	-0.0197326	776.37	FALSE	78
2022-09-15	11:20:09	0.498028	776.868	FALSE	78
2022-09-15	11:20:09	2.30078	779.169	FALSE	78
2022-09-15	11:20:10	2.71309	781.882	FALSE	78
2022-09-15	11:20:10	1.00561	782.888	FALSE	78
2022-09-15	11:20:10	0.105356	782.993	FALSE	78
2022-09-15	11:20:10	0.492277	783.486	FALSE	78
2022-09-15	11:20:11	2.97131	786.457	FALSE	78
2022-09-15	11:20:11	10.4297	796.887	1	79
2022-09-15	11:20:11	9.51278	806.399	1	80
2022-09-15	11:20:11	3.83482	810.234	1	81
2022-09-15	11:20:12	3.82556	814.06	1	82
2022-09-15	11:20:12	1.6592	815.719	FALSE	82
2022-09-15	11:20:12	2.62164	818.341	FALSE	82
2022-09-15	11:20:13	2.15594	820.497	FALSE	82
2022-09-15	11:20:13	2.53141	823.028	FALSE	82
2022-09-15	11:20:13	1.52775	824.556	FALSE	82
2022-09-15	11:20:13	2.94887	827.505	FALSE	82
2022-09-15	11:20:14	3.1365	830.641	1	83
2022-09-15	11:20:14	3.38261	834.024	1	84
2022-09-15	11:20:14	2.99431	837.018	FALSE	84
2022-09-15	11:20:14	2.98765	840.006	FALSE	84
2022-09-15	11:20:15	3.09548	843.101	1	85
2022-09-15	11:20:15	1.60169	844.703	FALSE	85
2022-09-15	11:20:15	2.85217	847.555	FALSE	85
2022-09-15	11:20:16	0.748766	848.304	FALSE	85
2022-09-15	11:20:16	1.34373	849.647	FALSE	85
2022-09-15	11:20:16	0.580573	850.228	FALSE	85
2022-09-15	11:20:16	0.847595	851.076	FALSE	85
2022-09-15	11:20:17	1.12098	852.197	FALSE	85
2022-09-15	11:20:17	0.95528	853.152	FALSE	85
2022-09-15	11:20:17	0.8764	854.028	FALSE	85
2022-09-15	11:20:17	0.365255	854.394	FALSE	85
2022-09-15	11:20:18	0.693499	855.087	FALSE	85
2022-09-15	11:20:18	0.976043	856.063	FALSE	85
2022-09-15	11:20:18	0.7193	856.782	FALSE	85
2022-09-15	11:20:18	0.624287	857.407	FALSE	85
2022-09-15	11:20:19	0.577723	857.984	FALSE	85
2022-09-15	11:20:19	0.191565	858.176	FALSE	85
2022-09-15	11:20:19	0.318079	858.494	FALSE	85
2022-09-15	11:20:20	0.745203	859.239	FALSE	85
2022-09-15	11:20:20	1.6281	860.867	FALSE	85
2022-09-15	11:20:20	1.69162	862.559	FALSE	85
2022-09-15	11:20:20	2.79319	865.352	FALSE	85
2022-09-15	11:20:21	2.94184	868.294	FALSE	85
2022-09-15	11:20:21	1.07396	869.368	FALSE	85
2022-09-15	11:20:21	2.11075	871.479	FALSE	85
2022-09-15	11:20:21	1.53971	873.018	FALSE	85
2022-09-15	11:20:22	2.20612	875.225	FALSE	85
2022-09-15	11:20:22	0.547697	875.772	FALSE	85
2022-09-15	11:20:22	0.503422	876.276	FALSE	85
2022-09-15	11:20:22	0.0929391	876.369	FALSE	85
2022-09-15	11:20:23	-0.260954	876.369	FALSE	85
2022-09-15	11:20:23	-0.30757	876.369	FALSE	85
2022-09-15	11:20:23	-0.206297	876.369	FALSE	85
2022-09-15	11:20:24	0.102659	876.471	FALSE	85
2022-09-15	11:20:24	-0.0989183	876.471	FALSE	85
2022-09-15	11:20:24	0.120318	876.592	FALSE	85
2022-09-15	11:20:24	-0.0554578	876.592	FALSE	85
2022-09-15	11:20:25	0.148359	876.74	FALSE	85
2022-09-15	11:20:25	-0.00919824	876.74	FALSE	85
2022-09-15	11:20:25	0.170395	876.91	FALSE	85
2022-09-15	11:20:25	0.241845	877.152	FALSE	85
2022-09-15	11:20:26	0.229428	877.382	FALSE	85
2022-09-15	11:20:26	0.0953819	877.477	FALSE	85
2022-09-15	11:20:26	0.119453	877.596	FALSE	85
2022-09-15	11:20:26	0.369936	877.966	FALSE	85
2022-09-15	11:20:27	0.142659	878.109	FALSE	85
2022-09-15	11:20:27	0.423728	878.533	FALSE	85
2022-09-15	11:20:27	0.513092	879.046	FALSE	85
2022-09-15	11:20:28	0.989733	880.036	FALSE	85
2022-09-15	11:20:28	1.05243	881.088	FALSE	85
2022-09-15	11:20:28	0.470395	881.558	FALSE	85
2022-09-15	11:20:28	0.0974684	881.656	FALSE	85
2022-09-15	11:20:29	0.315076	881.971	FALSE	85
2022-09-15	11:20:29	0.164186	882.135	FALSE	85
2022-09-15	11:20:29	0.301896	882.437	FALSE	85
2022-09-15	11:20:29	0.175178	882.612	FALSE	85
2022-09-15	11:20:30	0.207799	882.82	FALSE	85
2022-09-15	11:20:30	0.581132	883.401	FALSE	85
2022-09-15	11:20:30	0.259708	883.661	FALSE	85
2022-09-15	11:20:30	0.294771	883.956	FALSE	85
2022-09-15	11:20:31	0.317876	884.274	FALSE	85
2022-09-15	11:20:31	0.570445	884.844	FALSE	85
2022-09-15	11:20:31	1.59019	886.434	FALSE	85
2022-09-15	11:20:32	4.35879	890.793	1	86
2022-09-15	11:20:32	5.76057	896.554	1	87
2022-09-15	11:20:32	6.93777	903.491	1	88
2022-09-15	11:20:32	9.96041	913.452	1	89
2022-09-15	11:20:33	16.1208	929.572	1	90
2022-09-15	11:20:33	10.3716	939.944	1	91
2022-09-15	11:20:33	11.7409	951.685	1	92
2022-09-15	11:20:33	19.1825	970.867	1	93
2022-09-15	11:20:34	8.61207	979.48	1	94
2022-09-15	11:20:34	5.21166	984.691	1	95
2022-09-15	11:20:34	3.97614	988.667	1	96
2022-09-15	11:20:34	4.08179	992.749	1	97
2022-09-15	11:20:35	3.10775	995.857	1	98
2022-09-15	11:20:35	2.98016	998.837	FALSE	98
2022-09-15	11:20:35	2.25961	1001.1	FALSE	98
2022-09-15	11:20:36	1.931	1003.03	FALSE	98
2022-09-15	11:20:36	2.3819	1005.41	FALSE	98
2022-09-15	11:20:36	1.84912	1007.26	FALSE	98
2022-09-15	11:20:36	0.952277	1008.21	FALSE	98
2022-09-15	11:20:37	1.83808	1010.05	FALSE	98
2022-09-15	11:20:37	2.78861	1012.84	FALSE	98
2022-09-15	11:20:37	2.61502	1015.45	FALSE	98
2022-09-15	11:20:37	3.35319	1018.81	1	99
2022-09-15	11:20:38	4.59528	1023.4	1	100
2022-09-15	11:20:38	7.40943	1030.81	1	101
2022-09-15	11:20:38	6.11858	1036.93	1	102
2022-09-15	11:20:38	8.98148	1045.91	1	103
2022-09-15	11:20:39	11.7145	1057.63	1	104
2022-09-15	11:20:39	8.7482	1066.37	1	105
2022-09-15	11:20:39	4.94108	1071.31	1	106
2022-09-15	11:20:40	4.90256	1076.22	1	107
2022-09-15	11:20:40	7.95919	1084.18	1	108
2022-09-15	11:20:40	10.2421	1094.42	1	109
2022-09-15	11:20:40	7.90876	1102.33	1	110
2022-09-15	11:20:41	5.63726	1107.96	1	111
2022-09-15	11:20:41	6.10332	1114.07	1	112
2022-09-15	11:20:41	6.96067	1121.03	1	113
2022-09-15	11:20:41	4.75731	1125.79	1	114
2022-09-15	11:20:42	3.26632	1129.05	1	115
2022-09-15	11:20:42	3.32927	1132.38	1	116
2022-09-15	11:20:42	4.91681	1137.3	1	117
2022-09-15	11:20:42	4.96774	1142.27	1	118
2022-09-15	11:20:43	4.5936	1146.86	1	119
2022-09-15	11:20:43	3.81492	1150.67	1	120
2022-09-15	11:20:43	3.12383	1153.8	1	121
2022-09-15	11:20:44	1.32561	1155.12	FALSE	121
2022-09-15	11:20:44	0.45472	1155.58	FALSE	121
2022-09-15	11:20:44	0.448206	1156.03	FALSE	121
2022-09-15	11:20:44	0.459453	1156.49	FALSE	121
2022-09-15	11:20:45	0.497367	1156.98	FALSE	121
2022-09-15	11:20:45	0.862608	1157.85	FALSE	121
2022-09-15	11:20:45	0.257926	1158.1	FALSE	121
2022-09-15	11:20:45	0.173957	1158.28	FALSE	121
2022-09-15	11:20:46	0.208257	1158.49	FALSE	121
2022-09-15	11:20:46	0.117672	1158.6	FALSE	121
2022-09-15	11:20:46	-0.0585112	1158.6	FALSE	121
2022-09-15	11:20:46	-0.0103687	1158.6	FALSE	121
2022-09-15	11:20:47	-0.0326079	1158.6	FALSE	121
2022-09-15	11:20:47	-0.0919462	1158.6	FALSE	121
2022-09-15	11:20:47	-0.305534	1158.6	FALSE	121
2022-09-15	11:20:48	-0.156119	1158.6	FALSE	121
2022-09-15	11:20:48	-0.124618	1158.6	FALSE	121
2022-09-15	11:20:48	0.0931427	1158.7	FALSE	121
2022-09-15	11:20:48	3.50128	1162.2	1	122
2022-09-15	11:20:49	3.12149	1165.32	1	123
2022-09-15	11:20:49	7.28678	1172.61	1	124
2022-09-15	11:20:49	2.22566	1174.83	FALSE	124
2022-09-15	11:20:50	4.95971	1179.79	1	125
2022-09-15	11:20:50	3.54225	1183.33	1	126
2022-09-15	11:20:50	0.648562	1183.98	FALSE	126
2022-09-15	11:20:50	3.05024	1187.03	1	127
2022-09-15	11:20:50	2.208	1189.24	FALSE	127
2022-09-15	11:20:51	1.96017	1191.2	FALSE	127
2022-09-15	11:20:51	2.33981	1193.54	FALSE	127
2022-09-15	11:20:51	0.642099	1194.18	FALSE	127
2022-09-15	11:20:52	1.32561	1195.51	FALSE	127
2022-09-15	11:20:52	1.53747	1197.05	FALSE	127
2022-09-15	11:20:52	0.285255	1197.33	FALSE	127
2022-09-15	11:20:52	0.928613	1198.26	FALSE	127
2022-09-15	11:20:53	0.394211	1198.65	FALSE	127
2022-09-15	11:20:53	0.48785	1199.14	FALSE	127
2022-09-15	11:20:53	0.272634	1199.41	FALSE	127
2022-09-15	11:20:53	-0.132811	1199.41	FALSE	127
2022-09-15	11:20:54	-0.6636	1199.41	FALSE	127
2022-09-15	11:20:54	-0.302023	1199.41	FALSE	127
2022-09-15	11:20:54	0.122812	1199.54	FALSE	127
2022-09-15	11:20:54	0.0737534	1199.61	FALSE	127
2022-09-15	11:20:55	0.254008	1199.87	FALSE	127
2022-09-15	11:20:55	0.412023	1200.28	FALSE	127
2022-09-15	11:20:55	0.316654	1200.59	FALSE	127
2022-09-15	11:20:56	0.870547	1201.46	FALSE	127
2022-09-15	11:20:56	0.573397	1202.04	FALSE	127
2022-09-15	11:20:56	0.930293	1202.97	FALSE	127
2022-09-15	11:20:56	0.967494	1203.94	FALSE	127
2022-09-15	11:20:57	0.984796	1204.92	FALSE	127
2022-09-15	11:20:57	1.49523	1206.42	FALSE	127
2022-09-15	11:20:57	0.786425	1207.2	FALSE	127
2022-09-15	11:20:57	1.77482	1208.98	FALSE	127
2022-09-15	11:20:58	0.989326	1209.97	FALSE	127
2022-09-15	11:20:58	0.78215	1210.75	FALSE	127
2022-09-15	11:20:58	0.577977	1211.33	FALSE	127
2022-09-15	11:20:59	0.587239	1211.91	FALSE	127
2022-09-15	11:20:59	0.232685	1212.15	FALSE	127
2022-09-15	11:20:59	0.4936	1212.64	FALSE	127
2022-09-15	11:20:59	0.56388	1213.2	FALSE	127
2022-09-15	11:21:00	0.712176	1213.92	FALSE	127
2022-09-15	11:21:00	0.721234	1214.64	FALSE	127
2022-09-15	11:21:00	0.728104	1215.37	FALSE	127
2022-09-15	11:21:00	0.72673	1216.09	FALSE	127
2022-09-15	11:21:01	0.723524	1216.82	FALSE	127
2022-09-15	11:21:01	0.731158	1217.55	FALSE	127
2022-09-15	11:21:01	0.530903	1218.08	FALSE	127
2022-09-15	11:21:01	0.438181	1218.52	FALSE	127
2022-09-15	11:21:02	1.07197	1219.59	FALSE	127
2022-09-15	11:21:02	3.688	1223.28	1	128
2022-09-15	11:21:02	9.65696	1232.93	1	129
2022-09-15	11:21:03	12.3789	1245.31	1	130
2022-09-15	11:21:03	11.1639	1256.48	1	131
2022-09-15	11:21:03	2.64561	1259.12	FALSE	131
2022-09-15	11:21:03	5.52062	1264.64	1	132
2022-09-15	11:21:04	4.33029	1268.97	1	133
2022-09-15	11:21:04	0.978181	1269.95	FALSE	133
2022-09-15	11:21:04	2.07747	1272.03	FALSE	133
2022-09-15	11:21:04	2.98169	1275.01	FALSE	133
2022-09-15	11:21:05	1.5795	1276.59	FALSE	133
2022-09-15	11:21:05	0.726832	1277.32	FALSE	133
2022-09-15	11:21:05	0.752227	1278.07	FALSE	133
2022-09-15	11:21:05	3.4281	1281.5	1	134
2022-09-15	11:21:06	0.922863	1282.42	FALSE	134
2022-09-15	11:21:06	1.38144	1283.8	FALSE	134
2022-09-15	11:21:06	2.94815	1286.75	FALSE	134
2022-09-15	11:21:07	2.03243	1288.78	FALSE	134
2022-09-15	11:21:07	4.34907	1293.13	1	135
2022-09-15	11:21:07	2.20027	1295.33	FALSE	135
2022-09-15	11:21:07	2.78449	1298.11	FALSE	135
2022-09-15	11:21:08	1.59874	1299.71	FALSE	135
2022-09-15	11:21:08	1.00454	1300.72	FALSE	135
2022-09-15	11:21:08	1.64352	1302.36	FALSE	135
2022-09-15	11:21:08	0.246679	1302.61	FALSE	135
2022-09-15	11:21:09	0.362659	1302.97	FALSE	135
2022-09-15	11:21:09	1.27843	1304.25	FALSE	135
2022-09-15	11:21:09	0.686985	1304.94	FALSE	135
2022-09-15	11:21:09	1.86184	1306.8	FALSE	135
2022-09-15	11:21:10	3.22306	1310.02	1	136
2022-09-15	11:21:10	3.628	1313.65	1	137
2022-09-15	11:21:10	2.18907	1315.84	FALSE	137
2022-09-15	11:21:11	2.27375	1318.11	FALSE	137
2022-09-15	11:21:11	5.38897	1323.5	1	138
2022-09-15	11:21:11	2.63513	1326.14	FALSE	138
2022-09-15	11:21:11	2.91329	1329.05	FALSE	138
2022-09-15	11:21:12	2.4652	1331.51	FALSE	138
2022-09-15	11:21:12	1.73156	1333.25	FALSE	138
2022-09-15	11:21:12	4.69462	1337.94	1	139
2022-09-15	11:21:12	3.17614	1341.12	1	140
2022-09-15	11:21:13	3.30011	1344.42	1	141
2022-09-15	11:21:13	1.54597	1345.96	FALSE	141
2022-09-15	11:21:13	2.29304	1348.26	FALSE	141
2022-09-15	11:21:13	5.11044	1353.37	1	142
2022-09-15	11:21:14	1.46683	1354.83	FALSE	142
2022-09-15	11:21:14	2.23859	1357.07	FALSE	142
2022-09-15	11:21:14	3.62622	1360.7	1	143
2022-09-15	11:21:15	2.82276	1363.52	FALSE	143
2022-09-15	11:21:15	2.39884	1365.92	FALSE	143
2022-09-15	11:21:15	0.520471	1366.44	FALSE	143
2022-09-15	11:21:15	3.08749	1369.53	1	144
2022-09-15	11:21:16	0.710954	1370.24	FALSE	144
2022-09-15	11:21:16	0.850191	1371.09	FALSE	144
2022-09-15	11:21:16	2.24434	1373.33	FALSE	144
2022-09-15	11:21:16	1.16093	1374.49	FALSE	144
2022-09-15	11:21:17	0.273855	1374.77	FALSE	144
2022-09-15	11:21:17	0.159148	1374.93	FALSE	144
2022-09-15	11:21:17	0.104542	1375.03	FALSE	144
2022-09-15	11:21:17	-0.210216	1375.03	FALSE	144
2022-09-15	11:21:18	-0.0261448	1375.03	FALSE	144
2022-09-15	11:21:18	0.211921	1375.24	FALSE	144
2022-09-15	11:21:18	1.94556	1377.19	FALSE	144
2022-09-15	11:21:19	1.38128	1378.57	FALSE	144
2022-09-15	11:21:19	0.92444	1379.49	FALSE	144
2022-09-15	11:21:19	0.551107	1380.05	FALSE	144
2022-09-15	11:21:19	0.242049	1380.29	FALSE	144
2022-09-15	11:21:20	0.0453565	1380.33	FALSE	144
2022-09-15	11:21:20	0.0286135	1380.36	FALSE	144
2022-09-15	11:21:20	0.0550766	1380.42	FALSE	144
2022-09-15	11:21:20	0.294567	1380.71	FALSE	144
2022-09-15	11:21:21	0.467799	1381.18	FALSE	144
2022-09-15	11:21:21	0.549173	1381.73	FALSE	144
2022-09-15	11:21:21	0.307952	1382.04	FALSE	144
2022-09-15	11:21:21	0.308206	1382.34	FALSE	144
2022-09-15	11:21:22	0.174008	1382.52	FALSE	144
2022-09-15	11:21:22	0.312837	1382.83	FALSE	144
2022-09-15	11:21:22	0.34042	1383.17	FALSE	144
2022-09-15	11:21:23	0.237214	1383.41	FALSE	144
2022-09-15	11:21:23	0.424491	1383.83	FALSE	144
2022-09-15	11:21:23	0.447137	1384.28	FALSE	144
2022-09-15	11:21:23	0.290496	1384.57	FALSE	144
2022-09-15	11:21:24	0.324135	1384.9	FALSE	144
2022-09-15	11:21:24	0.18897	1385.08	FALSE	144
2022-09-15	11:21:24	0.34154	1385.43	FALSE	144
2022-09-15	11:21:24	0.0956364	1385.52	FALSE	144
2022-09-15	11:21:25	0.211565	1385.73	FALSE	144
2022-09-15	11:21:25	0.0276974	1385.76	FALSE	144
2022-09-15	11:21:25	-0.113269	1385.76	FALSE	144
2022-09-15	11:21:25	-0.237849	1385.76	FALSE	144
2022-09-15	11:21:26	-0.144414	1385.76	FALSE	144
2022-09-15	11:21:26	-0.293524	1385.76	FALSE	144
2022-09-15	11:21:26	-0.133422	1385.76	FALSE	144
2022-09-15	11:21:27	-0.283244	1385.76	FALSE	144
2022-09-15	11:21:27	-0.176119	1385.76	FALSE	144
2022-09-15	11:21:27	-0.247468	1385.76	FALSE	144
2022-09-15	11:21:27	0.13528	1385.9	FALSE	144
2022-09-15	11:21:28	0.156349	1386.05	FALSE	144
2022-09-15	11:21:28	0.40098	1386.45	FALSE	144
2022-09-15	11:21:28	0.00642519	1386.46	FALSE	144
2022-09-15	11:21:28	0.252634	1386.71	FALSE	144
2022-09-15	11:21:29	0.250089	1386.96	FALSE	144
2022-09-15	11:21:29	0.296145	1387.26	FALSE	144
2022-09-15	11:21:29	0.243168	1387.5	FALSE	144
2022-09-15	11:21:29	0.265713	1387.77	FALSE	144
2022-09-15	11:21:30	0.298842	1388.07	FALSE	144
2022-09-15	11:21:30	0.46388	1388.53	FALSE	144
2022-09-15	11:21:30	0.357112	1388.89	FALSE	144
2022-09-15	11:21:31	0.399809	1389.29	FALSE	144
2022-09-15	11:21:31	0.176247	1389.46	FALSE	144
2022-09-15	11:21:31	0.184542	1389.65	FALSE	144
2022-09-15	11:21:31	0.167443	1389.82	FALSE	144
2022-09-15	11:21:32	0.159148	1389.97	FALSE	144
2022-09-15	11:21:32	0.177519	1390.15	FALSE	144
2022-09-15	11:21:32	0.184695	1390.34	FALSE	144
2022-09-15	11:21:32	0.187646	1390.52	FALSE	144
2022-09-15	11:21:33	0.225662	1390.75	FALSE	144
2022-09-15	11:21:33	0.306832	1391.06	FALSE	144
2022-09-15	11:21:33	0.182099	1391.24	FALSE	144
2022-09-15	11:21:33	0.252125	1391.49	FALSE	144
2022-09-15	11:21:34	0.213804	1391.71	FALSE	144
2022-09-15	11:21:34	0.30154	1392.01	FALSE	144
2022-09-15	11:21:34	0.0128883	1392.02	FALSE	144
2022-09-15	11:21:35	0.173702	1392.19	FALSE	144
2022-09-15	11:21:35	0.180013	1392.37	FALSE	144
2022-09-15	11:21:35	0.116196	1392.49	FALSE	144
2022-09-15	11:21:35	-0.082786	1392.49	FALSE	144
2022-09-15	11:21:36	0.314008	1392.8	FALSE	144
2022-09-15	11:21:36	0.625662	1393.43	FALSE	144
2022-09-15	11:21:36	0.916908	1394.35	FALSE	144
2022-09-15	11:21:36	0.392227	1394.74	FALSE	144
2022-09-15	11:21:37	0.168257	1394.91	FALSE	144
2022-09-15	11:21:37	0.124339	1395.03	FALSE	144
2022-09-15	11:21:37	0.183168	1395.21	FALSE	144
2022-09-15	11:21:37	-0.0356104	1395.21	FALSE	144
2022-09-15	11:21:38	-0.130012	1395.21	FALSE	144
2022-09-15	11:21:38	-0.141412	1395.21	FALSE	144
2022-09-15	11:21:38	-0.131895	1395.21	FALSE	144
2022-09-15	11:21:39	-0.202481	1395.21	FALSE	144
2022-09-15	11:21:39	-0.286806	1395.21	FALSE	144
2022-09-15	11:21:39	-0.168537	1395.21	FALSE	144
2022-09-15	11:21:39	-0.135509	1395.21	FALSE	144
2022-09-15	11:21:40	-0.0362211	1395.21	FALSE	144
2022-09-15	11:21:40	-0.0212593	1395.21	FALSE	144
2022-09-15	11:21:40	0.124848	1395.34	FALSE	144
2022-09-15	11:21:40	0.15187	1395.49	FALSE	144
2022-09-15	11:21:41	0.00703587	1395.5	FALSE	144
2022-09-15	11:21:41	-0.160343	1395.5	FALSE	144
2022-09-15	11:21:41	-0.227824	1395.5	FALSE	144
2022-09-15	11:21:41	-0.397646	1395.5	FALSE	144
2022-09-15	11:21:42	-0.531539	1395.5	FALSE	144
2022-09-15	11:21:42	-0.39444	1395.5	FALSE	144
2022-09-15	11:21:42	-0.47902	1395.5	FALSE	144
2022-09-15	11:21:43	-0.343091	1395.5	FALSE	144
2022-09-15	11:21:43	-0.386653	1395.5	FALSE	144
2022-09-15	11:21:43	-0.261921	1395.5	FALSE	144
2022-09-15	11:21:43	-0.294135	1395.5	FALSE	144
2022-09-15	11:21:44	-0.206043	1395.5	FALSE	144
2022-09-15	11:21:44	-0.161412	1395.5	FALSE	144
2022-09-15	11:21:44	-0.27215	1395.5	FALSE	144
2022-09-15	11:21:44	-0.123855	1395.5	FALSE	144
2022-09-15	11:21:45	-0.206399	1395.5	FALSE	144
2022-09-15	11:21:45	0.0120231	1395.51	FALSE	144
2022-09-15	11:21:45	-0.194134	1395.51	FALSE	144
2022-09-15	11:21:45	-0.00690816	1395.51	FALSE	144
2022-09-15	11:21:46	0.0456618	1395.56	FALSE	144
2022-09-15	11:21:46	0.158079	1395.71	FALSE	144
2022-09-15	11:21:46	0.157316	1395.87	FALSE	144
2022-09-15	11:21:47	0.733448	1396.6	FALSE	144
2022-09-15	11:21:47	1.13131	1397.74	FALSE	144
2022-09-15	11:21:47	1.55416	1399.29	FALSE	144
2022-09-15	11:21:47	1.4849	1400.77	FALSE	144
2022-09-15	11:21:48	0.642354	1401.42	FALSE	144
2022-09-15	11:21:48	0.946679	1402.36	FALSE	144
2022-09-15	11:21:48	0.773601	1403.14	FALSE	144
2022-09-15	11:21:48	1.65798	1404.8	FALSE	144
2022-09-15	11:21:49	2.68754	1407.48	FALSE	144
2022-09-15	11:21:49	1.42933	1408.91	FALSE	144
2022-09-15	11:21:49	0.708562	1409.62	FALSE	144
2022-09-15	11:21:50	0.203626	1409.82	FALSE	144
2022-09-15	11:21:50	0.0528883	1409.88	FALSE	144
2022-09-15	11:21:50	-0.0423789	1409.88	FALSE	144
2022-09-15	11:21:50	0.044186	1409.92	FALSE	144
2022-09-15	11:21:51	-0.207061	1409.92	FALSE	144
2022-09-15	11:21:51	-0.130165	1409.92	FALSE	144
2022-09-15	11:21:51	-0.193829	1409.92	FALSE	144
2022-09-15	11:21:51	-0.139224	1409.92	FALSE	144
2022-09-15	11:21:52	0.0956872	1410.02	FALSE	144
2022-09-15	11:21:52	2.41156	1412.43	FALSE	144
2022-09-15	11:21:52	5.831	1418.26	1	145
2022-09-15	11:21:52	4.60291	1422.86	1	146
2022-09-15	11:21:53	3.4907	1426.35	1	147
2022-09-15	11:21:53	2.31243	1428.67	FALSE	147
2022-09-15	11:21:53	3.81085	1432.48	1	148
2022-09-15	11:21:54	1.05294	1433.53	FALSE	148
2022-09-15	11:21:54	1.06022	1434.59	FALSE	148
2022-09-15	11:21:54	0.620471	1435.21	FALSE	148
2022-09-15	11:21:54	0.537672	1435.75	FALSE	148
2022-09-15	11:21:55	0.100573	1435.85	FALSE	148
2022-09-15	11:21:55	0.0572649	1435.91	FALSE	148
2022-09-15	11:21:55	0.922659	1436.83	FALSE	148
2022-09-15	11:21:55	2.53055	1439.36	FALSE	148
2022-09-15	11:21:56	7.15212	1446.51	1	149
2022-09-15	11:21:56	8.96632	1455.48	1	150
2022-09-15	11:21:56	10.8116	1466.29	1	151
2022-09-15	11:21:56	7.03604	1473.32	1	152
2022-09-15	11:21:57	6.30479	1479.63	1	153
2022-09-15	11:21:57	6.69395	1486.32	1	154
2022-09-15	11:21:57	6.64734	1492.97	1	155
2022-09-15	11:21:58	10.8092	1503.78	1	156
2022-09-15	11:21:58	6.15512	1509.94	1	157
2022-09-15	11:21:58	13.1709	1523.11	1	158
2022-09-15	11:21:58	11.0778	1534.18	1	159
2022-09-15	11:21:59	9.49461	1543.68	1	160
2022-09-15	11:21:59	10.0837	1553.76	1	161
2022-09-15	11:21:59	6.12383	1559.89	1	162
2022-09-15	11:21:59	8.29314	1568.18	1	163
2022-09-15	11:22:00	5.85823	1574.04	1	164
2022-09-15	11:22:00	10.6294	1584.67	1	165
2022-09-15	11:22:00	6.79512	1591.46	1	166
2022-09-15	11:22:00	9.2249	1600.69	1	167
2022-09-15	11:22:01	13.1972	1613.88	1	168
2022-09-15	11:22:01	6.78428	1620.67	1	169
2022-09-15	11:22:01	12.0534	1632.72	1	170
2022-09-15	11:22:02	10.6061	1643.33	1	171
2022-09-15	11:22:02	12.5123	1655.84	1	172
2022-09-15	11:22:02	8.23736	1664.08	1	173
2022-09-15	11:22:02	9.78138	1673.86	1	174
2022-09-15	11:22:03	14.1764	1688.04	1	175
2022-09-15	11:22:03	2.80154	1690.84	FALSE	175
2022-09-15	11:22:03	3.37757	1694.21	1	176
2022-09-15	11:22:03	1.11665	1695.33	FALSE	176
2022-09-15	11:22:04	1.96556	1697.3	FALSE	176
2022-09-15	11:22:04	1.93497	1699.23	FALSE	176
2022-09-15	11:22:04	6.56011	1705.79	1	177
2022-09-15	11:22:04	9.36433	1715.16	1	178
2022-09-15	11:22:05	6.43767	1721.59	1	179
2022-09-15	11:22:05	2.62352	1724.22	FALSE	179
2022-09-15	11:22:05	0.382354	1724.6	FALSE	179
2022-09-15	11:22:06	0.44958	1725.05	FALSE	179
2022-09-15	11:22:06	0.660369	1725.71	FALSE	179
2022-09-15	11:22:06	1.18424	1726.89	FALSE	179
2022-09-15	11:22:06	5.98383	1732.88	1	180
2022-09-15	11:22:07	3.642	1736.52	1	181
2022-09-15	11:22:07	2.95645	1739.48	FALSE	181
2022-09-15	11:22:07	3.26617	1742.74	1	182
2022-09-15	11:22:07	3.11986	1745.86	1	183
2022-09-15	11:22:08	3.11803	1748.98	1	184
2022-09-15	11:22:08	2.63161	1751.61	FALSE	184
2022-09-15	11:22:08	3.56032	1755.17	1	185
2022-09-15	11:22:08	2.5509	1757.72	FALSE	185
2022-09-15	11:22:09	3.07548	1760.8	1	186
2022-09-15	11:22:09	3.47843	1764.28	1	187
2022-09-15	11:22:09	6.06785	1770.34	1	188
2022-09-15	11:22:10	6.42632	1776.77	1	189
2022-09-15	11:22:10	14.6391	1791.41	1	190
2022-09-15	11:22:10	9.32611	1800.74	1	191
2022-09-15	11:22:10	11.4171	1812.15	1	192
2022-09-15	11:22:11	5.75578	1817.91	1	193
2022-09-15	11:22:11	7.03136	1824.94	1	194
2022-09-15	11:22:11	8.72571	1833.67	1	195
2022-09-15	11:22:11	7.50718	1841.17	1	196
2022-09-15	11:22:12	10.589	1851.76	1	197
2022-09-15	11:22:12	8.82713	1860.59	1	198
2022-09-15	11:22:12	10.0691	1870.66	1	199
2022-09-15	11:22:12	7.82871	1878.49	1	200
2022-09-15	11:22:13	15.2034	1893.69	1	201
2022-09-15	11:22:13	13.7807	1907.47	1	202
2022-09-15	11:22:13	11.9435	1919.42	1	203
2022-09-15	11:22:14	11.0305	1930.45	1	204
2022-09-15	11:22:14	5.24683	1935.69	1	205
2022-09-15	11:22:14	7.36831	1943.06	1	206
2022-09-15	11:22:14	1.79518	1944.86	FALSE	206
2022-09-15	11:22:15	0.147138	1945	FALSE	206
2022-09-15	11:22:15	-0.040445	1945	FALSE	206
2022-09-15	11:22:15	-0.0426842	1945	FALSE	206
2022-09-15	11:22:15	-0.113778	1945	FALSE	206
2022-09-15	11:22:16	0.145051	1945.15	FALSE	206
2022-09-15	11:22:16	0.00179415	1945.15	FALSE	206
2022-09-15	11:22:16	0.00647607	1945.16	FALSE	206
2022-09-15	11:22:16	-0.0866537	1945.16	FALSE	206
2022-09-15	11:22:17	-0.0399361	1945.16	FALSE	206
2022-09-15	11:22:17	0.0434735	1945.2	FALSE	206
2022-09-15	11:22:17	0.0326338	1945.23	FALSE	206
2022-09-15	11:22:18	0.288054	1945.52	FALSE	206
2022-09-15	11:22:18	0.42383	1945.94	FALSE	206
2022-09-15	11:22:18	0.375026	1946.32	FALSE	206
2022-09-15	11:22:18	0.23472	1946.55	FALSE	206
2022-09-15	11:22:19	0.191769	1946.75	FALSE	206
2022-09-15	11:22:19	-0.0039056	1946.75	FALSE	206
2022-09-15	11:22:19	0.249326	1947	FALSE	206
2022-09-15	11:22:20	0.0801656	1947.08	FALSE	206
2022-09-15	11:22:20	0.0562979	1947.13	FALSE	206
2022-09-15	11:22:20	0.151565	1947.28	FALSE	206
2022-09-15	11:22:20	0.308919	1947.59	FALSE	206
2022-09-15	11:22:20	0.51014	1948.1	FALSE	206
2022-09-15	11:22:21	0.709173	1948.81	FALSE	206
2022-09-15	11:22:21	0.10383	1948.92	FALSE	206
2022-09-15	11:22:21	0.0499875	1948.97	FALSE	206
2022-09-15	11:22:22	0.336908	1949.3	FALSE	206
2022-09-15	11:22:22	0.180267	1949.48	FALSE	206
2022-09-15	11:22:22	0.18042	1949.66	FALSE	206
2022-09-15	11:22:22	0.0630155	1949.73	FALSE	206
2022-09-15	11:22:23	0.132328	1949.86	FALSE	206
2022-09-15	11:22:23	0.144491	1950	FALSE	206
2022-09-15	11:22:23	0.0876465	1950.09	FALSE	206
2022-09-15	11:22:23	0.0911071	1950.18	FALSE	206
2022-09-15	11:22:24	0.0296822	1950.21	FALSE	206
2022-09-15	11:22:24	-0.0122516	1950.21	FALSE	206
2022-09-15	11:22:24	-0.0391728	1950.21	FALSE	206
2022-09-15	11:22:24	-0.0782567	1950.21	FALSE	206
2022-09-15	11:22:25	-0.0620735	1950.21	FALSE	206
2022-09-15	11:22:25	-0.103346	1950.21	FALSE	206
2022-09-15	11:22:25	0.0738552	1950.28	FALSE	206
2022-09-15	11:22:26	0.0257636	1950.31	FALSE	206
2022-09-15	11:22:26	0.175687	1950.49	FALSE	206
2022-09-15	11:22:26	0.0500893	1950.54	FALSE	206
2022-09-15	11:22:26	0.119453	1950.66	FALSE	206
2022-09-15	11:22:27	0.152278	1950.81	FALSE	206
2022-09-15	11:22:27	0.14556	1950.95	FALSE	206
2022-09-15	11:22:27	0.149122	1951.1	FALSE	206
2022-09-15	11:22:27	0.0004201	1951.1	FALSE	206
2022-09-15	11:22:28	0.201641	1951.3	FALSE	206
2022-09-15	11:22:28	0.0918704	1951.4	FALSE	206
2022-09-15	11:22:28	0.227036	1951.62	FALSE	206
2022-09-15	11:22:28	0.22556	1951.85	FALSE	206
2022-09-15	11:22:29	3.78083	1955.63	1	207
2022-09-15	11:22:29	8.08958	1963.72	1	208
2022-09-15	11:22:29	8.48026	1972.2	1	209
2022-09-15	11:22:30	3.95808	1976.16	1	210
2022-09-15	11:22:30	4.97283	1981.13	1	211
2022-09-15	11:22:30	1.95548	1983.09	FALSE	211
2022-09-15	11:22:30	4.58027	1987.67	1	212
2022-09-15	11:22:31	1.83304	1989.5	FALSE	212
2022-09-15	11:22:31	3.67528	1993.18	1	213
2022-09-15	11:22:31	2.63558	1995.81	FALSE	213
2022-09-15	11:22:31	4.11665	1999.93	1	214
2022-09-15	11:22:32	3.83584	2003.76	1	215
2022-09-15	11:22:32	1.98663	2005.75	FALSE	215
2022-09-15	11:22:32	3.61055	2009.36	1	216
2022-09-15	11:22:32	2.59558	2011.96	FALSE	216
2022-09-15	11:22:33	5.20861	2017.16	1	217
2022-09-15	11:22:33	5.30423	2022.47	1	218
2022-09-15	11:22:33	6.90663	2029.38	1	219
2022-09-15	11:22:34	2.03187	2031.41	FALSE	219
2022-09-15	11:22:34	4.78011	2036.19	1	220
2022-09-15	11:22:34	3.2649	2039.45	1	221
2022-09-15	11:22:34	2.41803	2041.87	FALSE	221
2022-09-15	11:22:35	2.44113	2044.31	FALSE	221
2022-09-15	11:22:35	1.39513	2045.71	FALSE	221
2022-09-15	11:22:35	3.49945	2049.21	1	222
2022-09-15	11:22:35	3.13625	2052.34	1	223
2022-09-15	11:22:36	3.41813	2055.76	1	224
2022-09-15	11:22:36	3.64098	2059.4	1	225
2022-09-15	11:22:36	7.08006	2066.48	1	226
2022-09-15	11:22:36	4.99278	2071.47	1	227
2022-09-15	11:22:37	5.55833	2077.03	1	228
2022-09-15	11:22:37	3.87818	2080.91	1	229
2022-09-15	11:22:37	7.78337	2088.69	1	230
2022-09-15	11:22:38	3.67752	2092.37	1	231
2022-09-15	11:22:38	5.6166	2097.99	1	232
2022-09-15	11:22:38	3.23396	2101.22	1	233
2022-09-15	11:22:38	9.87003	2111.09	1	234
2022-09-15	11:22:39	4.05334	2115.15	1	235
2022-09-15	11:22:39	6.58006	2121.73	1	236
2022-09-15	11:22:39	3.37217	2125.1	1	237
2022-09-15	11:22:39	7.49848	2132.6	1	238
2022-09-15	11:22:40	3.54978	2136.15	1	239
2022-09-15	11:22:40	4.05289	2140.2	1	240
2022-09-15	11:22:40	0.930649	2141.13	FALSE	240
2022-09-15	11:22:40	2.21452	2143.34	FALSE	240
2022-09-15	11:22:41	0.563524	2143.91	FALSE	240
2022-09-15	11:22:41	1.59574	2145.5	FALSE	240
2022-09-15	11:22:41	0.560776	2146.06	FALSE	240
2022-09-15	11:22:42	1.41721	2147.48	FALSE	240
2022-09-15	11:22:42	1.42749	2148.91	FALSE	240
2022-09-15	11:22:42	0.208359	2149.12	FALSE	240
2022-09-15	11:22:42	0.875229	2149.99	FALSE	240
2022-09-15	11:22:43	-0.216475	2149.99	FALSE	240
2022-09-15	11:22:43	0.669326	2150.66	FALSE	240
2022-09-15	11:22:43	1.68917	2152.35	FALSE	240
2022-09-15	11:22:43	-0.177392	2152.35	FALSE	240
2022-09-15	11:22:44	1.84337	2154.19	FALSE	240
2022-09-15	11:22:44	4.92062	2159.11	1	241
2022-09-15	11:22:44	4.87691	2163.99	1	242
2022-09-15	11:22:44	2.64744	2166.64	FALSE	242
2022-09-15	11:22:45	1.89935	2168.54	FALSE	242
2022-09-15	11:22:45	5.02642	2173.57	1	243
2022-09-15	11:22:45	4.38647	2177.95	1	244
2022-09-15	11:22:46	6.29054	2184.24	1	245
2022-09-15	11:22:46	3.39365	2187.64	1	246
2022-09-15	11:22:46	6.81293	2194.45	1	247
2022-09-15	11:22:46	6.3683	2200.82	1	248
2022-09-15	11:22:47	4.08189	2204.9	1	249
2022-09-15	11:22:47	1.96169	2206.86	FALSE	249
2022-09-15	11:22:47	2.41457	2209.28	FALSE	249
2022-09-15	11:22:47	1.34683	2210.62	FALSE	249
2022-09-15	11:22:48	0.283779	2210.91	FALSE	249
2022-09-15	11:22:48	0.132125	2211.04	FALSE	249
2022-09-15	11:22:48	-0.0159667	2211.04	FALSE	249
2022-09-15	11:22:48	1.15406	2212.19	FALSE	249
2022-09-15	11:22:49	0.529478	2212.72	FALSE	249
2022-09-15	11:22:49	0.824695	2213.55	FALSE	249
2022-09-15	11:22:49	3.00826	2216.55	1	250
2022-09-15	11:22:50	4.21106	2220.77	1	251
2022-09-15	11:22:50	4.49446	2225.26	1	252
2022-09-15	11:22:50	4.04418	2229.3	1	253
2022-09-15	11:22:50	5.36555	2234.67	1	254
2022-09-15	11:22:51	5.8136	2240.48	1	255
2022-09-15	11:22:51	5.32693	2245.81	1	256
2022-09-15	11:22:51	1.91523	2247.73	FALSE	256
2022-09-15	11:22:51	9.41604	2257.14	1	257
2022-09-15	11:22:52	6.39803	2263.54	1	258
2022-09-15	11:22:52	4.27161	2267.81	1	259
2022-09-15	11:22:52	2.37513	2270.19	FALSE	259
2022-09-15	11:22:52	1.26454	2271.45	FALSE	259
2022-09-15	11:22:53	5.60281	2277.05	1	260
2022-09-15	11:22:53	4.69324	2281.75	1	261
2022-09-15	11:22:53	7.87543	2289.62	1	262
2022-09-15	11:22:54	3.39024	2293.01	1	263
2022-09-15	11:22:54	7.6652	2300.68	1	264
2022-09-15	11:22:54	7.38159	2308.06	1	265
2022-09-15	11:22:54	5.95243	2314.01	1	266
2022-09-15	11:22:55	7.12815	2321.14	1	267
2022-09-15	11:22:55	4.34423	2325.48	1	268
2022-09-15	11:22:55	6.25304	2331.74	1	269
2022-09-15	11:22:55	8.64372	2340.38	1	270
2022-09-15	11:22:56	6.46963	2346.85	1	271
2022-09-15	11:22:56	9.14846	2356	1	272
2022-09-15	11:22:56	11.1248	2367.12	1	273
2022-09-15	11:22:56	8.00164	2375.13	1	274
2022-09-15	11:22:57	16.3237	2391.45	1	275
2022-09-15	11:22:57	15.0788	2406.53	1	276
2022-09-15	11:22:57	11.177	2417.7	1	277
2022-09-15	11:22:58	2.40098	2420.11	FALSE	277
2022-09-15	11:22:58	12.122	2432.23	1	278
2022-09-15	11:22:58	22.6119	2454.84	1	279
2022-09-15	11:22:58	24.6436	2479.48	1	280
2022-09-15	11:22:59	7.76591	2487.25	1	281
2022-09-15	11:22:59	5.14367	2492.39	1	282
2022-09-15	11:22:59	9.56749	2501.96	1	283
2022-09-15	11:22:59	7.63899	2509.6	1	284
2022-09-15	11:23:00	4.34403	2513.94	1	285
2022-09-15	11:23:00	5.32286	2519.27	1	286
2022-09-15	11:23:00	6.60978	2525.88	1	287
2022-09-15	11:23:00	12.5548	2538.43	1	288
2022-09-15	11:23:01	13.9944	2552.43	1	289
2022-09-15	11:23:01	16.41	2568.84	1	290
2022-09-15	11:23:01	12.9278	2581.76	1	291
2022-09-15	11:23:02	14.4307	2596.19	1	292
2022-09-15	11:23:02	13.181	2609.37	1	293
2022-09-15	11:23:02	11.8085	2621.18	1	294
2022-09-15	11:23:02	12.1151	2633.3	1	295
2022-09-15	11:23:03	15.2961	2648.59	1	296
2022-09-15	11:23:03	13.9436	2662.54	1	297
2022-09-15	11:23:03	14.3714	2676.91	1	298
2022-09-15	11:23:03	12.1027	2689.01	1	299
2022-09-15	11:23:04	6.9965	2696.01	1	300
2022-09-15	11:23:04	8.36337	2704.37	1	301
2022-09-15	11:23:04	11.4527	2715.82	1	302
2022-09-15	11:23:04	15.5715	2731.4	1	303
2022-09-15	11:23:05	13.3208	2744.72	1	304
2022-09-15	11:23:05	21.3901	2766.11	1	305
2022-09-15	11:23:05	17.5537	2783.66	1	306
2022-09-15	11:23:06	13.2111	2796.87	1	307
2022-09-15	11:23:06	2.90693	2799.78	FALSE	307
2022-09-15	11:23:06	5.89726	2805.68	1	308
2022-09-15	11:23:06	5.48601	2811.16	1	309
2022-09-15	11:23:07	6.04342	2817.21	1	310
2022-09-15	11:23:07	14.802	2832.01	1	311
2022-09-15	11:23:07	15.3319	2847.34	1	312
2022-09-15	11:23:07	18.5217	2865.86	1	313
2022-09-15	11:23:08	15.5666	2881.43	1	314
2022-09-15	11:23:08	9.22311	2890.65	1	315
2022-09-15	11:23:08	2.7823	2893.43	FALSE	315
2022-09-15	11:23:08	2.09187	2895.52	FALSE	315
2022-09-15	11:23:09	1.36912	2896.89	FALSE	315
2022-09-15	11:23:09	0.990598	2897.88	FALSE	315
2022-09-15	11:23:09	1.12709	2899.01	FALSE	315
2022-09-15	11:23:10	0.778181	2899.79	FALSE	315
2022-09-15	11:23:10	0.917875	2900.71	FALSE	315
2022-09-15	11:23:10	1.0594	2901.77	FALSE	315
2022-09-15	11:23:10	0.595331	2902.36	FALSE	315
2022-09-15	11:23:11	0.452634	2902.82	FALSE	315
2022-09-15	11:23:11	0.398181	2903.21	FALSE	315
2022-09-15	11:23:11	0.441132	2903.65	FALSE	315
2022-09-15	11:23:11	0.441336	2904.1	FALSE	315
2022-09-15	11:23:12	0.469835	2904.57	FALSE	315
2022-09-15	11:23:12	0.670038	2905.24	FALSE	315
2022-09-15	11:23:12	1.12052	2906.36	FALSE	315
2022-09-15	11:23:12	1.48795	2907.84	FALSE	315
2022-09-15	11:23:13	0.96271	2908.81	FALSE	315
2022-09-15	11:23:13	1.22296	2910.03	FALSE	315
2022-09-15	11:23:13	1.16734	2911.2	FALSE	315
2022-09-15	11:23:14	1.08139	2912.28	FALSE	315
2022-09-15	11:23:14	1.20037	2913.48	FALSE	315
2022-09-15	11:23:14	0.776145	2914.26	FALSE	315
2022-09-15	11:23:14	0.298537	2914.55	FALSE	315
2022-09-15	11:23:15	0.00459311	2914.56	FALSE	315
2022-09-15	11:23:15	-0.110369	2914.56	FALSE	315
2022-09-15	11:23:15	-0.209809	2914.56	FALSE	315
2022-09-15	11:23:15	-0.3922	2914.56	FALSE	315
2022-09-15	11:23:16	-0.32818	2914.56	FALSE	315
2022-09-15	11:23:16	-0.569249	2914.56	FALSE	315
2022-09-15	11:23:16	-1.26681	2914.56	FALSE	315
2022-09-15	11:23:16	-0.17388	2914.56	FALSE	315
2022-09-15	11:23:17	0.249529	2914.81	FALSE	315
2022-09-15	11:23:17	1.34693	2916.15	FALSE	315
2022-09-15	11:23:17	5.86652	2922.02	1	316
2022-09-15	11:23:18	12.9691	2934.99	1	317
2022-09-15	11:23:18	10.1021	2945.09	1	318
2022-09-15	11:23:18	13.1597	2958.25	1	319
2022-09-15	11:23:18	9.7082	2967.96	1	320
2022-09-15	11:23:19	19.7426	2987.7	1	321
2022-09-15	11:23:19	19.8362	3007.54	1	322
2022-09-15	11:23:19	8.43217	3015.97	1	323
2022-09-15	11:23:19	8.27441	3024.25	1	324
2022-09-15	11:23:20	0.834466	3025.08	FALSE	324
2022-09-15	11:23:20	3.15233	3028.23	1	325
2022-09-15	11:23:20	5.06464	3033.3	1	326
2022-09-15	11:23:20	6.08138	3039.38	1	327
2022-09-15	11:23:21	10.7255	3050.1	1	328
2022-09-15	11:23:21	8.94215	3059.05	1	329
2022-09-15	11:23:21	7.92652	3066.97	1	330
2022-09-15	11:23:22	9.84734	3076.82	1	331
2022-09-15	11:23:22	8.9026	3085.72	1	332
2022-09-15	11:23:22	3.89263	3089.62	1	333
2022-09-15	11:23:22	2.06088	3091.68	FALSE	333
2022-09-15	11:23:23	0.862812	3092.54	FALSE	333
2022-09-15	11:23:23	1.12057	3093.66	FALSE	333
2022-09-15	11:23:23	0.798639	3094.46	FALSE	333
2022-09-15	11:23:23	1.15253	3095.61	FALSE	333
2022-09-15	11:23:24	2.2221	3097.83	FALSE	333
2022-09-15	11:23:24	6.20652	3104.04	1	334
2022-09-15	11:23:24	6.90332	3110.94	1	335
2022-09-15	11:23:24	2.62469	3113.57	FALSE	335
2022-09-15	11:23:25	1.81762	3115.38	FALSE	335
2022-09-15	11:23:25	1.29788	3116.68	FALSE	335
2022-09-15	11:23:25	1.32322	3118.01	FALSE	335
2022-09-15	11:23:26	1.0879	3119.09	FALSE	335
2022-09-15	11:23:26	2.25635	3121.35	FALSE	335
2022-09-15	11:23:26	1.82388	3123.17	FALSE	335
2022-09-15	11:23:26	3.06586	3126.24	1	336
2022-09-15	11:23:27	1.59207	3127.83	FALSE	336
2022-09-15	11:23:27	2.99843	3130.83	FALSE	336
2022-09-15	11:23:27	1.79391	3132.62	FALSE	336
2022-09-15	11:23:27	3.30159	3135.93	1	337
2022-09-15	11:23:28	3.44347	3139.37	1	338
2022-09-15	11:23:28	3.53523	3142.9	1	339
2022-09-15	11:23:28	1.95752	3144.86	FALSE	339
2022-09-15	11:23:29	1.29192	3146.15	FALSE	339
2022-09-15	11:23:29	0.603473	3146.76	FALSE	339
2022-09-15	11:23:29	0.451565	3147.21	FALSE	339
2022-09-15	11:23:29	0.389377	3147.6	FALSE	339
2022-09-15	11:23:30	0.445662	3148.04	FALSE	339
2022-09-15	11:23:30	0.931361	3148.98	FALSE	339
2022-09-15	11:23:30	0.685204	3149.66	FALSE	339
2022-09-15	11:23:30	1.05406	3150.71	FALSE	339
2022-09-15	11:23:31	1.02729	3151.74	FALSE	339
2022-09-15	11:23:31	1.62368	3153.37	FALSE	339
2022-09-15	11:23:31	1.68139	3155.05	FALSE	339
2022-09-15	11:23:31	3.56744	3158.61	1	340
2022-09-15	11:23:32	1.74724	3160.36	FALSE	340
2022-09-15	11:23:32	1.71411	3162.08	FALSE	340
2022-09-15	11:23:32	0.860776	3162.94	FALSE	340
2022-09-15	11:23:32	0.610649	3163.55	FALSE	340
2022-09-15	11:23:33	0.146934	3163.69	FALSE	340
2022-09-15	11:23:33	0.525916	3164.22	FALSE	340
2022-09-15	11:23:33	0.572837	3164.79	FALSE	340
2022-09-15	11:23:34	0.721946	3165.52	FALSE	340
2022-09-15	11:23:34	0.656908	3166.17	FALSE	340
2022-09-15	11:23:34	0.0769595	3166.25	FALSE	340
2022-09-15	11:23:34	-0.165839	3166.25	FALSE	340
2022-09-15	11:23:35	-0.135152	3166.25	FALSE	340
2022-09-15	11:23:35	-0.208995	3166.25	FALSE	340
2022-09-15	11:23:35	0.343982	3166.59	FALSE	340
2022-09-15	11:23:35	0.296654	3166.89	FALSE	340
2022-09-15	11:23:36	-0.0359667	3166.89	FALSE	340
2022-09-15	11:23:36	-0.325381	3166.89	FALSE	340
2022-09-15	11:23:36	1.13986	3168.03	FALSE	340
2022-09-15	11:23:37	0.697723	3168.73	FALSE	340
2022-09-15	11:23:37	0.811463	3169.54	FALSE	340
2022-09-15	11:23:37	0.593244	3170.13	FALSE	340
2022-09-15	11:23:37	0.59528	3170.73	FALSE	340
2022-09-15	11:23:38	0.44159	3171.17	FALSE	340
2022-09-15	11:23:38	0.376196	3171.54	FALSE	340
2022-09-15	11:23:38	0.499606	3172.04	FALSE	340
2022-09-15	11:23:38	0.499606	3172.54	FALSE	340
2022-09-15	11:23:39	1.09996	3173.64	FALSE	340
2022-09-15	11:23:39	1.19793	3174.84	FALSE	340
2022-09-15	11:23:39	0.83014	3175.67	FALSE	340
2022-09-15	11:23:39	0.562099	3176.23	FALSE	340
2022-09-15	11:23:40	0.482405	3176.72	FALSE	340
2022-09-15	11:23:40	0.492583	3177.21	FALSE	340
2022-09-15	11:23:40	-0.379427	3177.21	FALSE	340
2022-09-15	11:23:40	-0.556526	3177.21	FALSE	340
2022-09-15	11:23:41	-0.850826	3177.21	FALSE	340
2022-09-15	11:23:41	-1.01719	3177.21	FALSE	340
2022-09-15	11:23:41	-1.00263	3177.21	FALSE	340
2022-09-15	11:23:42	-0.932557	3177.21	FALSE	340
2022-09-15	11:23:42	-0.707569	3177.21	FALSE	340
2022-09-15	11:23:42	-0.765686	3177.21	FALSE	340
2022-09-15	11:23:42	-0.726144	3177.21	FALSE	340
2022-09-15	11:23:43	-0.762786	3177.21	FALSE	340

## Sheet: Tyr_star_2022915111828
						**GoPro Fitting: 1108
2022-09-15	11:18:29	-0.0975951
2022-09-15	11:18:29	0.0984862
2022-09-15	11:18:29	0.147036
2022-09-15	11:18:29	0.151209
2022-09-15	11:18:30	0.18098
2022-09-15	11:18:30	0.214568
2022-09-15	11:18:30	0.205764
2022-09-15	11:18:30	0.258384
2022-09-15	11:18:31	0.229428
2022-09-15	11:18:31	0.343423
2022-09-15	11:18:31	0.291514
2022-09-15	11:18:32	0.406883
2022-09-15	11:18:32	0.272532
2022-09-15	11:18:32	0.208461
2022-09-15	11:18:32	0.255484
2022-09-15	11:18:33	0.270344
2022-09-15	11:18:33	0.22215
2022-09-15	11:18:33	0.222812
2022-09-15	11:18:33	0.252277
2022-09-15	11:18:34	0.238588
2022-09-15	11:18:34	0.263626
2022-09-15	11:18:34	0.262506
2022-09-15	11:18:34	0.25411
2022-09-15	11:18:35	0.26388
2022-09-15	11:18:35	0.266629
2022-09-15	11:18:35	0.27355
2022-09-15	11:18:36	0.265611
2022-09-15	11:18:36	0.260827
2022-09-15	11:18:36	0.269173
2022-09-15	11:18:36	0.264186
2022-09-15	11:18:37	0.274618
2022-09-15	11:18:37	0.285865
2022-09-15	11:18:37	0.248003
2022-09-15	11:18:37	0.268155
2022-09-15	11:18:38	0.326221
2022-09-15	11:18:38	0.296349
2022-09-15	11:18:38	0.311972
2022-09-15	11:18:39	0.292532
2022-09-15	11:18:39	0.304746
2022-09-15	11:18:39	0.305407
2022-09-15	11:18:39	0.281896
2022-09-15	11:18:40	0.30154
2022-09-15	11:18:40	0.330445
2022-09-15	11:18:40	0.261031
2022-09-15	11:18:40	0.3193
2022-09-15	11:18:41	0.390445
2022-09-15	11:18:41	0.461692
2022-09-15	11:18:41	1.12261
2022-09-15	11:18:41	1.10541
2022-09-15	11:18:42	1.62312
2022-09-15	11:18:42	0.833651
2022-09-15	11:18:42	0.489326
2022-09-15	11:18:43	0.34098
2022-09-15	11:18:43	0.672023
2022-09-15	11:18:43	0.669326
2022-09-15	11:18:43	0.653906
2022-09-15	11:18:44	1.09182
2022-09-15	11:18:44	1.94413
2022-09-15	11:18:44	1.69447
2022-09-15	11:18:44	1.14958
2022-09-15	11:18:45	1.43757
2022-09-15	11:18:45	1.15457
2022-09-15	11:18:45	2.93523
2022-09-15	11:18:45	2.86118
2022-09-15	11:18:46	1.18581
2022-09-15	11:18:46	1.07436
2022-09-15	11:18:46	1.8108
2022-09-15	11:18:47	4.13151
2022-09-15	11:18:47	5.27711
2022-09-15	11:18:47	7.32113
2022-09-15	11:18:47	4.45411
2022-09-15	11:18:48	2.74658
2022-09-15	11:18:48	4.9139
2022-09-15	11:18:48	2.82296
2022-09-15	11:18:48	3.44688
2022-09-15	11:18:49	2.66469
2022-09-15	11:18:49	3.45594
2022-09-15	11:18:49	8.77721
2022-09-15	11:18:49	6.06037
2022-09-15	11:18:50	12.9147
2022-09-15	11:18:50	7.26937
2022-09-15	11:18:50	2.27966
2022-09-15	11:18:51	3.29441
2022-09-15	11:18:51	2.73925
2022-09-15	11:18:51	4.12586
2022-09-15	11:18:51	3.04958
2022-09-15	11:18:52	5.00515
2022-09-15	11:18:52	6.93914
2022-09-15	11:18:52	1.93986
2022-09-15	11:18:52	1.51075
2022-09-15	11:18:53	1.3277
2022-09-15	11:18:53	0.61528
2022-09-15	11:18:53	0.409377
2022-09-15	11:18:53	0.521692
2022-09-15	11:18:54	0.536043
2022-09-15	11:18:54	0.231921
2022-09-15	11:18:54	2.02836
2022-09-15	11:18:55	6.56322
2022-09-15	11:18:55	5.16317
2022-09-15	11:18:55	4.6934
2022-09-15	11:18:55	3.54617
2022-09-15	11:18:56	8.06505
2022-09-15	11:18:56	5.95273
2022-09-15	11:18:56	10.1897
2022-09-15	11:18:56	17.802
2022-09-15	11:18:57	7.47853
2022-09-15	11:18:57	16.571
2022-09-15	11:18:57	11.7821
2022-09-15	11:18:57	15.062
2022-09-15	11:18:58	23.5241
2022-09-15	11:18:58	8.34449
2022-09-15	11:18:58	9.23075
2022-09-15	11:18:59	3.69146
2022-09-15	11:18:59	1.71726
2022-09-15	11:18:59	0.632888
2022-09-15	11:18:59	0.295484
2022-09-15	11:19:00	0.567392
2022-09-15	11:19:00	0.173092
2022-09-15	11:19:00	0.398181
2022-09-15	11:19:00	0.317366
2022-09-15	11:19:01	0.393499
2022-09-15	11:19:01	0.275891
2022-09-15	11:19:01	0.377672
2022-09-15	11:19:01	0.420318
2022-09-15	11:19:02	0.635127
2022-09-15	11:19:02	1.84948
2022-09-15	11:19:02	1.99314
2022-09-15	11:19:03	1.64337
2022-09-15	11:19:03	0.856094
2022-09-15	11:19:03	0.866628
2022-09-15	11:19:03	0.248512
2022-09-15	11:19:04	0.261641
2022-09-15	11:19:04	0.226221
2022-09-15	11:19:04	-0.0572898
2022-09-15	11:19:04	0.0671885
2022-09-15	11:19:05	0.221896
2022-09-15	11:19:05	0.612888
2022-09-15	11:19:05	0.894822
2022-09-15	11:19:06	0.849987
2022-09-15	11:19:06	0.866781
2022-09-15	11:19:06	1.4335
2022-09-15	11:19:06	0.561896
2022-09-15	11:19:07	0.270191
2022-09-15	11:19:07	0.15528
2022-09-15	11:19:07	0.0194023
2022-09-15	11:19:07	0.230242
2022-09-15	11:19:08	0.32215
2022-09-15	11:19:08	1.40739
2022-09-15	11:19:08	2.33365
2022-09-15	11:19:08	3.51457
2022-09-15	11:19:09	3.88591
2022-09-15	11:19:09	1.9251
2022-09-15	11:19:09	1.96266
2022-09-15	11:19:10	1.72749
2022-09-15	11:19:10	3.29075
2022-09-15	11:19:10	3.91299
2022-09-15	11:19:10	9.72199
2022-09-15	11:19:11	8.71268
2022-09-15	11:19:11	3.81869
2022-09-15	11:19:11	4.42408
2022-09-15	11:19:11	5.63238
2022-09-15	11:19:12	6.92663
2022-09-15	11:19:12	3.85228
2022-09-15	11:19:12	2.4394
2022-09-15	11:19:12	3.40627
2022-09-15	11:19:13	1.70973
2022-09-15	11:19:13	1.33559
2022-09-15	11:19:13	0.629427
2022-09-15	11:19:14	0.778537
2022-09-15	11:19:14	0.465255
2022-09-15	11:19:14	0.669733
2022-09-15	11:19:14	0.72383
2022-09-15	11:19:15	1.27406
2022-09-15	11:19:15	0.68271
2022-09-15	11:19:15	1.07324
2022-09-15	11:19:15	0.357519
2022-09-15	11:19:16	0.48897
2022-09-15	11:19:16	0.360267
2022-09-15	11:19:16	0.356756
2022-09-15	11:19:16	0.324593
2022-09-15	11:19:17	0.333041
2022-09-15	11:19:17	0.521336
2022-09-15	11:19:17	0.527086
2022-09-15	11:19:18	0.588461
2022-09-15	11:19:18	1.52683
2022-09-15	11:19:18	2.29004
2022-09-15	11:19:18	3.7937
2022-09-15	11:19:19	2.06724
2022-09-15	11:19:19	1.13854
2022-09-15	11:19:19	0.587443
2022-09-15	11:19:19	0.60958
2022-09-15	11:19:20	0.365662
2022-09-15	11:19:20	0.445
2022-09-15	11:19:20	0.249529
2022-09-15	11:19:20	0.40958
2022-09-15	11:19:21	0.335942
2022-09-15	11:19:21	0.288817
2022-09-15	11:19:21	0.163015
2022-09-15	11:19:22	-0.30019
2022-09-15	11:19:22	-0.299682
2022-09-15	11:19:22	-0.434949
2022-09-15	11:19:22	-0.399071
2022-09-15	11:19:23	-0.554491
2022-09-15	11:19:23	-0.528689
2022-09-15	11:19:23	-0.532659
2022-09-15	11:19:23	-0.353473
2022-09-15	11:19:24	0.0236262
2022-09-15	11:19:24	1.23324
2022-09-15	11:19:24	2.36205
2022-09-15	11:19:24	2.15579
2022-09-15	11:19:25	2.71116
2022-09-15	11:19:25	1.72413
2022-09-15	11:19:25	1.48434
2022-09-15	11:19:26	4.05563
2022-09-15	11:19:26	2.08388
2022-09-15	11:19:26	3.88678
2022-09-15	11:19:26	4.74668
2022-09-15	11:19:27	3.75889
2022-09-15	11:19:27	2.70678
2022-09-15	11:19:27	1.01691
2022-09-15	11:19:27	3.50261
2022-09-15	11:19:28	1.8078
2022-09-15	11:19:28	2.01645
2022-09-15	11:19:28	3.58648
2022-09-15	11:19:28	2.25543
2022-09-15	11:19:29	1.98169
2022-09-15	11:19:29	1.46108
2022-09-15	11:19:29	1.72617
2022-09-15	11:19:30	1.66994
2022-09-15	11:19:30	0.628511
2022-09-15	11:19:30	0.292532
2022-09-15	11:19:30	0.70785
2022-09-15	11:19:31	0.244593
2022-09-15	11:19:31	0.178232
2022-09-15	11:19:31	0.299911
2022-09-15	11:19:31	0.201845
2022-09-15	11:19:32	0.166629
2022-09-15	11:19:32	0.288715
2022-09-15	11:19:32	0.287239
2022-09-15	11:19:32	0.412379
2022-09-15	11:19:33	0.278842
2022-09-15	11:19:33	0.746578
2022-09-15	11:19:33	0.517926
2022-09-15	11:19:34	0.985611
2022-09-15	11:19:34	1.84816
2022-09-15	11:19:34	1.17859
2022-09-15	11:19:34	1.29365
2022-09-15	11:19:35	0.499758
2022-09-15	11:19:35	1.13838
2022-09-15	11:19:35	1.67141
2022-09-15	11:19:35	1.08571
2022-09-15	11:19:36	1.50098
2022-09-15	11:19:36	1.09503
2022-09-15	11:19:36	1.52123
2022-09-15	11:19:36	0.871972
2022-09-15	11:19:37	1.70093
2022-09-15	11:19:37	1.3392
2022-09-15	11:19:37	1.36032
2022-09-15	11:19:38	0.26612
2022-09-15	11:19:38	0.425254
2022-09-15	11:19:38	0.357723
2022-09-15	11:19:38	0.543168
2022-09-15	11:19:39	0.607951
2022-09-15	11:19:39	0.52897
2022-09-15	11:19:39	0.538588
2022-09-15	11:19:39	0.474873
2022-09-15	11:19:40	0.387748
2022-09-15	11:19:40	0.396909
2022-09-15	11:19:40	0.241234
2022-09-15	11:19:41	0.109122
2022-09-15	11:19:41	0.2364
2022-09-15	11:19:41	0.247697
2022-09-15	11:19:41	0.0635244
2022-09-15	11:19:42	0.175687
2022-09-15	11:19:42	0.199809
2022-09-15	11:19:42	0.183219
2022-09-15	11:19:42	0.774568
2022-09-15	11:19:43	1.86291
2022-09-15	11:19:43	9.30159
2022-09-15	11:19:43	5.02978
2022-09-15	11:19:43	5.66372
2022-09-15	11:19:44	1.87508
2022-09-15	11:19:44	2.31462
2022-09-15	11:19:44	2.51889
2022-09-15	11:19:45	0.896298
2022-09-15	11:19:45	0.911463
2022-09-15	11:19:45	0.310191
2022-09-15	11:19:45	0.899351
2022-09-15	11:19:46	1.17024
2022-09-15	11:19:46	3.86195
2022-09-15	11:19:46	8.43675
2022-09-15	11:19:46	4.57512
2022-09-15	11:19:47	4.15691
2022-09-15	11:19:47	3.05258
2022-09-15	11:19:47	1.2509
2022-09-15	11:19:47	2.03411
2022-09-15	11:19:48	1.9166
2022-09-15	11:19:48	2.62592
2022-09-15	11:19:48	3.52398
2022-09-15	11:19:49	3.31151
2022-09-15	11:19:49	3.74022
2022-09-15	11:19:49	2.69996
2022-09-15	11:19:49	4.22907
2022-09-15	11:19:50	2.85747
2022-09-15	11:19:50	2.94698
2022-09-15	11:19:50	2.5479
2022-09-15	11:19:50	2.09111
2022-09-15	11:19:51	2.11915
2022-09-15	11:19:51	1.63126
2022-09-15	11:19:51	0.954924
2022-09-15	11:19:51	0.584949
2022-09-15	11:19:52	0.3164
2022-09-15	11:19:52	0.655382
2022-09-15	11:19:52	0.207392
2022-09-15	11:19:53	0.333957
2022-09-15	11:19:53	0.0950766
2022-09-15	11:19:53	0.22042
2022-09-15	11:19:53	0.13869
2022-09-15	11:19:54	0.268766
2022-09-15	11:19:54	0.0678501
2022-09-15	11:19:54	0.231412
2022-09-15	11:19:54	0.234211
2022-09-15	11:19:55	0.116451
2022-09-15	11:19:55	0.31416
2022-09-15	11:19:55	0.266629
2022-09-15	11:19:55	0.432837
2022-09-15	11:19:56	0.25757
2022-09-15	11:19:56	0.419199
2022-09-15	11:19:56	0.356603
2022-09-15	11:19:57	0.456501
2022-09-15	11:19:57	0.393448
2022-09-15	11:19:57	0.240064
2022-09-15	11:19:57	0.315789
2022-09-15	11:19:58	0.220267
2022-09-15	11:19:58	0.380013
2022-09-15	11:19:58	0.0925829
2022-09-15	11:19:58	0.208919
2022-09-15	11:19:59	0.179962
2022-09-15	11:19:59	0.324288
2022-09-15	11:19:59	0.138537
2022-09-15	11:19:59	0.235636
2022-09-15	11:20:00	0.375484
2022-09-15	11:20:00	0.0732445
2022-09-15	11:20:00	0.325967
2022-09-15	11:20:01	0.170649
2022-09-15	11:20:01	0.246985
2022-09-15	11:20:01	0.194975
2022-09-15	11:20:01	0.222252
2022-09-15	11:20:02	0.560929
2022-09-15	11:20:02	0.80215
2022-09-15	11:20:02	2.67986
2022-09-15	11:20:02	6.33894
2022-09-15	11:20:03	8.24937
2022-09-15	11:20:03	4.71981
2022-09-15	11:20:03	3.97533
2022-09-15	11:20:03	2.01711
2022-09-15	11:20:04	0.278792
2022-09-15	11:20:04	0.840623
2022-09-15	11:20:04	1.55436
2022-09-15	11:20:05	6.13721
2022-09-15	11:20:05	12.1089
2022-09-15	11:20:05	18.5966
2022-09-15	11:20:05	19.0466
2022-09-15	11:20:06	2.96296
2022-09-15	11:20:06	4.90632
2022-09-15	11:20:06	1.7708
2022-09-15	11:20:06	11.7027
2022-09-15	11:20:07	3.04912
2022-09-15	11:20:07	2.9853
2022-09-15	11:20:07	5.23421
2022-09-15	11:20:07	10.0168
2022-09-15	11:20:08	18.2244
2022-09-15	11:20:08	4.06825
2022-09-15	11:20:08	0.85243
2022-09-15	11:20:09	0.283422
2022-09-15	11:20:09	-0.0197326
2022-09-15	11:20:09	0.498028
2022-09-15	11:20:09	2.30078
2022-09-15	11:20:10	2.71309
2022-09-15	11:20:10	1.00561
2022-09-15	11:20:10	0.105356
2022-09-15	11:20:10	0.492277
2022-09-15	11:20:11	2.97131
2022-09-15	11:20:11	10.4297
2022-09-15	11:20:11	9.51278
2022-09-15	11:20:11	3.83482
2022-09-15	11:20:12	3.82556
2022-09-15	11:20:12	1.6592
2022-09-15	11:20:12	2.62164
2022-09-15	11:20:13	2.15594
2022-09-15	11:20:13	2.53141
2022-09-15	11:20:13	1.52775
2022-09-15	11:20:13	2.94887
2022-09-15	11:20:14	3.1365
2022-09-15	11:20:14	3.38261
2022-09-15	11:20:14	2.99431
2022-09-15	11:20:14	2.98765
2022-09-15	11:20:15	3.09548
2022-09-15	11:20:15	1.60169
2022-09-15	11:20:15	2.85217
2022-09-15	11:20:16	0.748766
2022-09-15	11:20:16	1.34373
2022-09-15	11:20:16	0.580573
2022-09-15	11:20:16	0.847595
2022-09-15	11:20:17	1.12098
2022-09-15	11:20:17	0.95528
2022-09-15	11:20:17	0.8764
2022-09-15	11:20:17	0.365255
2022-09-15	11:20:18	0.693499
2022-09-15	11:20:18	0.976043
2022-09-15	11:20:18	0.7193
2022-09-15	11:20:18	0.624287
2022-09-15	11:20:19	0.577723
2022-09-15	11:20:19	0.191565
2022-09-15	11:20:19	0.318079
2022-09-15	11:20:20	0.745203
2022-09-15	11:20:20	1.6281
2022-09-15	11:20:20	1.69162
2022-09-15	11:20:20	2.79319
2022-09-15	11:20:21	2.94184
2022-09-15	11:20:21	1.07396
2022-09-15	11:20:21	2.11075
2022-09-15	11:20:21	1.53971
2022-09-15	11:20:22	2.20612
2022-09-15	11:20:22	0.547697
2022-09-15	11:20:22	0.503422
2022-09-15	11:20:22	0.0929391
2022-09-15	11:20:23	-0.260954
2022-09-15	11:20:23	-0.30757
2022-09-15	11:20:23	-0.206297
2022-09-15	11:20:24	0.102659
2022-09-15	11:20:24	-0.0989183
2022-09-15	11:20:24	0.120318
2022-09-15	11:20:24	-0.0554578
2022-09-15	11:20:25	0.148359
2022-09-15	11:20:25	-0.00919824
2022-09-15	11:20:25	0.170395
2022-09-15	11:20:25	0.241845
2022-09-15	11:20:26	0.229428
2022-09-15	11:20:26	0.0953819
2022-09-15	11:20:26	0.119453
2022-09-15	11:20:26	0.369936
2022-09-15	11:20:27	0.142659
2022-09-15	11:20:27	0.423728
2022-09-15	11:20:27	0.513092
2022-09-15	11:20:28	0.989733
2022-09-15	11:20:28	1.05243
2022-09-15	11:20:28	0.470395
2022-09-15	11:20:28	0.0974684
2022-09-15	11:20:29	0.315076
2022-09-15	11:20:29	0.164186
2022-09-15	11:20:29	0.301896
2022-09-15	11:20:29	0.175178
2022-09-15	11:20:30	0.207799
2022-09-15	11:20:30	0.581132
2022-09-15	11:20:30	0.259708
2022-09-15	11:20:30	0.294771
2022-09-15	11:20:31	0.317876
2022-09-15	11:20:31	0.570445
2022-09-15	11:20:31	1.59019
2022-09-15	11:20:32	4.35879
2022-09-15	11:20:32	5.76057
2022-09-15	11:20:32	6.93777
2022-09-15	11:20:32	9.96041
2022-09-15	11:20:33	16.1208
2022-09-15	11:20:33	10.3716
2022-09-15	11:20:33	11.7409
2022-09-15	11:20:33	19.1825
2022-09-15	11:20:34	8.61207
2022-09-15	11:20:34	5.21166
2022-09-15	11:20:34	3.97614
2022-09-15	11:20:34	4.08179
2022-09-15	11:20:35	3.10775
2022-09-15	11:20:35	2.98016
2022-09-15	11:20:35	2.25961
2022-09-15	11:20:36	1.931
2022-09-15	11:20:36	2.3819
2022-09-15	11:20:36	1.84912
2022-09-15	11:20:36	0.952277
2022-09-15	11:20:37	1.83808
2022-09-15	11:20:37	2.78861
2022-09-15	11:20:37	2.61502
2022-09-15	11:20:37	3.35319
2022-09-15	11:20:38	4.59528
2022-09-15	11:20:38	7.40943
2022-09-15	11:20:38	6.11858
2022-09-15	11:20:38	8.98148
2022-09-15	11:20:39	11.7145
2022-09-15	11:20:39	8.7482
2022-09-15	11:20:39	4.94108
2022-09-15	11:20:40	4.90256
2022-09-15	11:20:40	7.95919
2022-09-15	11:20:40	10.2421
2022-09-15	11:20:40	7.90876
2022-09-15	11:20:41	5.63726
2022-09-15	11:20:41	6.10332
2022-09-15	11:20:41	6.96067
2022-09-15	11:20:41	4.75731
2022-09-15	11:20:42	3.26632
2022-09-15	11:20:42	3.32927
2022-09-15	11:20:42	4.91681
2022-09-15	11:20:42	4.96774
2022-09-15	11:20:43	4.5936
2022-09-15	11:20:43	3.81492
2022-09-15	11:20:43	3.12383
2022-09-15	11:20:44	1.32561
2022-09-15	11:20:44	0.45472
2022-09-15	11:20:44	0.448206
2022-09-15	11:20:44	0.459453
2022-09-15	11:20:45	0.497367
2022-09-15	11:20:45	0.862608
2022-09-15	11:20:45	0.257926
2022-09-15	11:20:45	0.173957
2022-09-15	11:20:46	0.208257
2022-09-15	11:20:46	0.117672
2022-09-15	11:20:46	-0.0585112
2022-09-15	11:20:46	-0.0103687
2022-09-15	11:20:47	-0.0326079
2022-09-15	11:20:47	-0.0919462
2022-09-15	11:20:47	-0.305534
2022-09-15	11:20:48	-0.156119
2022-09-15	11:20:48	-0.124618
2022-09-15	11:20:48	0.0931427
2022-09-15	11:20:48	3.50128
2022-09-15	11:20:49	3.12149
2022-09-15	11:20:49	7.28678
2022-09-15	11:20:49	2.22566
2022-09-15	11:20:50	4.95971
2022-09-15	11:20:50	3.54225
2022-09-15	11:20:50	0.648562
2022-09-15	11:20:50	3.05024
2022-09-15	11:20:50	2.208
2022-09-15	11:20:51	1.96017
2022-09-15	11:20:51	2.33981
2022-09-15	11:20:51	0.642099
2022-09-15	11:20:52	1.32561
2022-09-15	11:20:52	1.53747
2022-09-15	11:20:52	0.285255
2022-09-15	11:20:52	0.928613
2022-09-15	11:20:53	0.394211
2022-09-15	11:20:53	0.48785
2022-09-15	11:20:53	0.272634
2022-09-15	11:20:53	-0.132811
2022-09-15	11:20:54	-0.6636
2022-09-15	11:20:54	-0.302023
2022-09-15	11:20:54	0.122812
2022-09-15	11:20:54	0.0737534
2022-09-15	11:20:55	0.254008
2022-09-15	11:20:55	0.412023
2022-09-15	11:20:55	0.316654
2022-09-15	11:20:56	0.870547
2022-09-15	11:20:56	0.573397
2022-09-15	11:20:56	0.930293
2022-09-15	11:20:56	0.967494
2022-09-15	11:20:57	0.984796
2022-09-15	11:20:57	1.49523
2022-09-15	11:20:57	0.786425
2022-09-15	11:20:57	1.77482
2022-09-15	11:20:58	0.989326
2022-09-15	11:20:58	0.78215
2022-09-15	11:20:58	0.577977
2022-09-15	11:20:59	0.587239
2022-09-15	11:20:59	0.232685
2022-09-15	11:20:59	0.4936
2022-09-15	11:20:59	0.56388
2022-09-15	11:21:00	0.712176
2022-09-15	11:21:00	0.721234
2022-09-15	11:21:00	0.728104
2022-09-15	11:21:00	0.72673
2022-09-15	11:21:01	0.723524
2022-09-15	11:21:01	0.731158
2022-09-15	11:21:01	0.530903
2022-09-15	11:21:01	0.438181
2022-09-15	11:21:02	1.07197
2022-09-15	11:21:02	3.688
2022-09-15	11:21:02	9.65696
2022-09-15	11:21:03	12.3789
2022-09-15	11:21:03	11.1639
2022-09-15	11:21:03	2.64561
2022-09-15	11:21:03	5.52062
2022-09-15	11:21:04	4.33029
2022-09-15	11:21:04	0.978181
2022-09-15	11:21:04	2.07747
2022-09-15	11:21:04	2.98169
2022-09-15	11:21:05	1.5795
2022-09-15	11:21:05	0.726832
2022-09-15	11:21:05	0.752227
2022-09-15	11:21:05	3.4281
2022-09-15	11:21:06	0.922863
2022-09-15	11:21:06	1.38144
2022-09-15	11:21:06	2.94815
2022-09-15	11:21:07	2.03243
2022-09-15	11:21:07	4.34907
2022-09-15	11:21:07	2.20027
2022-09-15	11:21:07	2.78449
2022-09-15	11:21:08	1.59874
2022-09-15	11:21:08	1.00454
2022-09-15	11:21:08	1.64352
2022-09-15	11:21:08	0.246679
2022-09-15	11:21:09	0.362659
2022-09-15	11:21:09	1.27843
2022-09-15	11:21:09	0.686985
2022-09-15	11:21:09	1.86184
2022-09-15	11:21:10	3.22306
2022-09-15	11:21:10	3.628
2022-09-15	11:21:10	2.18907
2022-09-15	11:21:11	2.27375
2022-09-15	11:21:11	5.38897
2022-09-15	11:21:11	2.63513
2022-09-15	11:21:11	2.91329
2022-09-15	11:21:12	2.4652
2022-09-15	11:21:12	1.73156
2022-09-15	11:21:12	4.69462
2022-09-15	11:21:12	3.17614
2022-09-15	11:21:13	3.30011
2022-09-15	11:21:13	1.54597
2022-09-15	11:21:13	2.29304
2022-09-15	11:21:13	5.11044
2022-09-15	11:21:14	1.46683
2022-09-15	11:21:14	2.23859
2022-09-15	11:21:14	3.62622
2022-09-15	11:21:15	2.82276
2022-09-15	11:21:15	2.39884
2022-09-15	11:21:15	0.520471
2022-09-15	11:21:15	3.08749
2022-09-15	11:21:16	0.710954
2022-09-15	11:21:16	0.850191
2022-09-15	11:21:16	2.24434
2022-09-15	11:21:16	1.16093
2022-09-15	11:21:17	0.273855
2022-09-15	11:21:17	0.159148
2022-09-15	11:21:17	0.104542
2022-09-15	11:21:17	-0.210216
2022-09-15	11:21:18	-0.0261448
2022-09-15	11:21:18	0.211921
2022-09-15	11:21:18	1.94556
2022-09-15	11:21:19	1.38128
2022-09-15	11:21:19	0.92444
2022-09-15	11:21:19	0.551107
2022-09-15	11:21:19	0.242049
2022-09-15	11:21:20	0.0453565
2022-09-15	11:21:20	0.0286135
2022-09-15	11:21:20	0.0550766
2022-09-15	11:21:20	0.294567
2022-09-15	11:21:21	0.467799
2022-09-15	11:21:21	0.549173
2022-09-15	11:21:21	0.307952
2022-09-15	11:21:21	0.308206
2022-09-15	11:21:22	0.174008
2022-09-15	11:21:22	0.312837
2022-09-15	11:21:22	0.34042
2022-09-15	11:21:23	0.237214
2022-09-15	11:21:23	0.424491
2022-09-15	11:21:23	0.447137
2022-09-15	11:21:23	0.290496
2022-09-15	11:21:24	0.324135
2022-09-15	11:21:24	0.18897
2022-09-15	11:21:24	0.34154
2022-09-15	11:21:24	0.0956364
2022-09-15	11:21:25	0.211565
2022-09-15	11:21:25	0.0276974
2022-09-15	11:21:25	-0.113269
2022-09-15	11:21:25	-0.237849
2022-09-15	11:21:26	-0.144414
2022-09-15	11:21:26	-0.293524
2022-09-15	11:21:26	-0.133422
2022-09-15	11:21:27	-0.283244
2022-09-15	11:21:27	-0.176119
2022-09-15	11:21:27	-0.247468
2022-09-15	11:21:27	0.13528
2022-09-15	11:21:28	0.156349
2022-09-15	11:21:28	0.40098
2022-09-15	11:21:28	0.00642519
2022-09-15	11:21:28	0.252634
2022-09-15	11:21:29	0.250089
2022-09-15	11:21:29	0.296145
2022-09-15	11:21:29	0.243168
2022-09-15	11:21:29	0.265713
2022-09-15	11:21:30	0.298842
2022-09-15	11:21:30	0.46388
2022-09-15	11:21:30	0.357112
2022-09-15	11:21:31	0.399809
2022-09-15	11:21:31	0.176247
2022-09-15	11:21:31	0.184542
2022-09-15	11:21:31	0.167443
2022-09-15	11:21:32	0.159148
2022-09-15	11:21:32	0.177519
2022-09-15	11:21:32	0.184695
2022-09-15	11:21:32	0.187646
2022-09-15	11:21:33	0.225662
2022-09-15	11:21:33	0.306832
2022-09-15	11:21:33	0.182099
2022-09-15	11:21:33	0.252125
2022-09-15	11:21:34	0.213804
2022-09-15	11:21:34	0.30154
2022-09-15	11:21:34	0.0128883
2022-09-15	11:21:35	0.173702
2022-09-15	11:21:35	0.180013
2022-09-15	11:21:35	0.116196
2022-09-15	11:21:35	-0.082786
2022-09-15	11:21:36	0.314008
2022-09-15	11:21:36	0.625662
2022-09-15	11:21:36	0.916908
2022-09-15	11:21:36	0.392227
2022-09-15	11:21:37	0.168257
2022-09-15	11:21:37	0.124339
2022-09-15	11:21:37	0.183168
2022-09-15	11:21:37	-0.0356104
2022-09-15	11:21:38	-0.130012
2022-09-15	11:21:38	-0.141412
2022-09-15	11:21:38	-0.131895
2022-09-15	11:21:39	-0.202481
2022-09-15	11:21:39	-0.286806
2022-09-15	11:21:39	-0.168537
2022-09-15	11:21:39	-0.135509
2022-09-15	11:21:40	-0.0362211
2022-09-15	11:21:40	-0.0212593
2022-09-15	11:21:40	0.124848
2022-09-15	11:21:40	0.15187
2022-09-15	11:21:41	0.00703587
2022-09-15	11:21:41	-0.160343
2022-09-15	11:21:41	-0.227824
2022-09-15	11:21:41	-0.397646
2022-09-15	11:21:42	-0.531539
2022-09-15	11:21:42	-0.39444
2022-09-15	11:21:42	-0.47902
2022-09-15	11:21:43	-0.343091
2022-09-15	11:21:43	-0.386653
2022-09-15	11:21:43	-0.261921
2022-09-15	11:21:43	-0.294135
2022-09-15	11:21:44	-0.206043
2022-09-15	11:21:44	-0.161412
2022-09-15	11:21:44	-0.27215
2022-09-15	11:21:44	-0.123855
2022-09-15	11:21:45	-0.206399
2022-09-15	11:21:45	0.0120231
2022-09-15	11:21:45	-0.194134
2022-09-15	11:21:45	-0.00690816
2022-09-15	11:21:46	0.0456618
2022-09-15	11:21:46	0.158079
2022-09-15	11:21:46	0.157316
2022-09-15	11:21:47	0.733448
2022-09-15	11:21:47	1.13131
2022-09-15	11:21:47	1.55416
2022-09-15	11:21:47	1.4849
2022-09-15	11:21:48	0.642354
2022-09-15	11:21:48	0.946679
2022-09-15	11:21:48	0.773601
2022-09-15	11:21:48	1.65798
2022-09-15	11:21:49	2.68754
2022-09-15	11:21:49	1.42933
2022-09-15	11:21:49	0.708562
2022-09-15	11:21:50	0.203626
2022-09-15	11:21:50	0.0528883
2022-09-15	11:21:50	-0.0423789
2022-09-15	11:21:50	0.044186
2022-09-15	11:21:51	-0.207061
2022-09-15	11:21:51	-0.130165
2022-09-15	11:21:51	-0.193829
2022-09-15	11:21:51	-0.139224
2022-09-15	11:21:52	0.0956872
2022-09-15	11:21:52	2.41156
2022-09-15	11:21:52	5.831
2022-09-15	11:21:52	4.60291
2022-09-15	11:21:53	3.4907
2022-09-15	11:21:53	2.31243
2022-09-15	11:21:53	3.81085
2022-09-15	11:21:54	1.05294
2022-09-15	11:21:54	1.06022
2022-09-15	11:21:54	0.620471
2022-09-15	11:21:54	0.537672
2022-09-15	11:21:55	0.100573
2022-09-15	11:21:55	0.0572649
2022-09-15	11:21:55	0.922659
2022-09-15	11:21:55	2.53055
2022-09-15	11:21:56	7.15212
2022-09-15	11:21:56	8.96632
2022-09-15	11:21:56	10.8116
2022-09-15	11:21:56	7.03604
2022-09-15	11:21:57	6.30479
2022-09-15	11:21:57	6.69395
2022-09-15	11:21:57	6.64734
2022-09-15	11:21:58	10.8092
2022-09-15	11:21:58	6.15512
2022-09-15	11:21:58	13.1709
2022-09-15	11:21:58	11.0778
2022-09-15	11:21:59	9.49461
2022-09-15	11:21:59	10.0837
2022-09-15	11:21:59	6.12383
2022-09-15	11:21:59	8.29314
2022-09-15	11:22:00	5.85823
2022-09-15	11:22:00	10.6294
2022-09-15	11:22:00	6.79512
2022-09-15	11:22:00	9.2249
2022-09-15	11:22:01	13.1972
2022-09-15	11:22:01	6.78428
2022-09-15	11:22:01	12.0534
2022-09-15	11:22:02	10.6061
2022-09-15	11:22:02	12.5123
2022-09-15	11:22:02	8.23736
2022-09-15	11:22:02	9.78138
2022-09-15	11:22:03	14.1764
2022-09-15	11:22:03	2.80154
2022-09-15	11:22:03	3.37757
2022-09-15	11:22:03	1.11665
2022-09-15	11:22:04	1.96556
2022-09-15	11:22:04	1.93497
2022-09-15	11:22:04	6.56011
2022-09-15	11:22:04	9.36433
2022-09-15	11:22:05	6.43767
2022-09-15	11:22:05	2.62352
2022-09-15	11:22:05	0.382354
2022-09-15	11:22:06	0.44958
2022-09-15	11:22:06	0.660369
2022-09-15	11:22:06	1.18424
2022-09-15	11:22:06	5.98383
2022-09-15	11:22:07	3.642
2022-09-15	11:22:07	2.95645
2022-09-15	11:22:07	3.26617
2022-09-15	11:22:07	3.11986
2022-09-15	11:22:08	3.11803
2022-09-15	11:22:08	2.63161
2022-09-15	11:22:08	3.56032
2022-09-15	11:22:08	2.5509
2022-09-15	11:22:09	3.07548
2022-09-15	11:22:09	3.47843
2022-09-15	11:22:09	6.06785
2022-09-15	11:22:10	6.42632
2022-09-15	11:22:10	14.6391
2022-09-15	11:22:10	9.32611
2022-09-15	11:22:10	11.4171
2022-09-15	11:22:11	5.75578
2022-09-15	11:22:11	7.03136
2022-09-15	11:22:11	8.72571
2022-09-15	11:22:11	7.50718
2022-09-15	11:22:12	10.589
2022-09-15	11:22:12	8.82713
2022-09-15	11:22:12	10.0691
2022-09-15	11:22:12	7.82871
2022-09-15	11:22:13	15.2034
2022-09-15	11:22:13	13.7807
2022-09-15	11:22:13	11.9435
2022-09-15	11:22:14	11.0305
2022-09-15	11:22:14	5.24683
2022-09-15	11:22:14	7.36831
2022-09-15	11:22:14	1.79518
2022-09-15	11:22:15	0.147138
2022-09-15	11:22:15	-0.040445
2022-09-15	11:22:15	-0.0426842
2022-09-15	11:22:15	-0.113778
2022-09-15	11:22:16	0.145051
2022-09-15	11:22:16	0.00179415
2022-09-15	11:22:16	0.00647607
2022-09-15	11:22:16	-0.0866537
2022-09-15	11:22:17	-0.0399361
2022-09-15	11:22:17	0.0434735
2022-09-15	11:22:17	0.0326338
2022-09-15	11:22:18	0.288054
2022-09-15	11:22:18	0.42383
2022-09-15	11:22:18	0.375026
2022-09-15	11:22:18	0.23472
2022-09-15	11:22:19	0.191769
2022-09-15	11:22:19	-0.0039056
2022-09-15	11:22:19	0.249326
2022-09-15	11:22:20	0.0801656
2022-09-15	11:22:20	0.0562979
2022-09-15	11:22:20	0.151565
2022-09-15	11:22:20	0.308919
2022-09-15	11:22:20	0.51014
2022-09-15	11:22:21	0.709173
2022-09-15	11:22:21	0.10383
2022-09-15	11:22:21	0.0499875
2022-09-15	11:22:22	0.336908
2022-09-15	11:22:22	0.180267
2022-09-15	11:22:22	0.18042
2022-09-15	11:22:22	0.0630155
2022-09-15	11:22:23	0.132328
2022-09-15	11:22:23	0.144491
2022-09-15	11:22:23	0.0876465
2022-09-15	11:22:23	0.0911071
2022-09-15	11:22:24	0.0296822
2022-09-15	11:22:24	-0.0122516
2022-09-15	11:22:24	-0.0391728
2022-09-15	11:22:24	-0.0782567
2022-09-15	11:22:25	-0.0620735
2022-09-15	11:22:25	-0.103346
2022-09-15	11:22:25	0.0738552
2022-09-15	11:22:26	0.0257636
2022-09-15	11:22:26	0.175687
2022-09-15	11:22:26	0.0500893
2022-09-15	11:22:26	0.119453
2022-09-15	11:22:27	0.152278
2022-09-15	11:22:27	0.14556
2022-09-15	11:22:27	0.149122
2022-09-15	11:22:27	0.0004201
2022-09-15	11:22:28	0.201641
2022-09-15	11:22:28	0.0918704
2022-09-15	11:22:28	0.227036
2022-09-15	11:22:28	0.22556
2022-09-15	11:22:29	3.78083
2022-09-15	11:22:29	8.08958
2022-09-15	11:22:29	8.48026
2022-09-15	11:22:30	3.95808
2022-09-15	11:22:30	4.97283
2022-09-15	11:22:30	1.95548
2022-09-15	11:22:30	4.58027
2022-09-15	11:22:31	1.83304
2022-09-15	11:22:31	3.67528
2022-09-15	11:22:31	2.63558
2022-09-15	11:22:31	4.11665
2022-09-15	11:22:32	3.83584
2022-09-15	11:22:32	1.98663
2022-09-15	11:22:32	3.61055
2022-09-15	11:22:32	2.59558
2022-09-15	11:22:33	5.20861
2022-09-15	11:22:33	5.30423
2022-09-15	11:22:33	6.90663
2022-09-15	11:22:34	2.03187
2022-09-15	11:22:34	4.78011
2022-09-15	11:22:34	3.2649
2022-09-15	11:22:34	2.41803
2022-09-15	11:22:35	2.44113
2022-09-15	11:22:35	1.39513
2022-09-15	11:22:35	3.49945
2022-09-15	11:22:35	3.13625
2022-09-15	11:22:36	3.41813
2022-09-15	11:22:36	3.64098
2022-09-15	11:22:36	7.08006
2022-09-15	11:22:36	4.99278
2022-09-15	11:22:37	5.55833
2022-09-15	11:22:37	3.87818
2022-09-15	11:22:37	7.78337
2022-09-15	11:22:38	3.67752
2022-09-15	11:22:38	5.6166
2022-09-15	11:22:38	3.23396
2022-09-15	11:22:38	9.87003
2022-09-15	11:22:39	4.05334
2022-09-15	11:22:39	6.58006
2022-09-15	11:22:39	3.37217
2022-09-15	11:22:39	7.49848
2022-09-15	11:22:40	3.54978
2022-09-15	11:22:40	4.05289
2022-09-15	11:22:40	0.930649
2022-09-15	11:22:40	2.21452
2022-09-15	11:22:41	0.563524
2022-09-15	11:22:41	1.59574
2022-09-15	11:22:41	0.560776
2022-09-15	11:22:42	1.41721
2022-09-15	11:22:42	1.42749
2022-09-15	11:22:42	0.208359
2022-09-15	11:22:42	0.875229
2022-09-15	11:22:43	-0.216475
2022-09-15	11:22:43	0.669326
2022-09-15	11:22:43	1.68917
2022-09-15	11:22:43	-0.177392
2022-09-15	11:22:44	1.84337
2022-09-15	11:22:44	4.92062
2022-09-15	11:22:44	4.87691
2022-09-15	11:22:44	2.64744
2022-09-15	11:22:45	1.89935
2022-09-15	11:22:45	5.02642
2022-09-15	11:22:45	4.38647
2022-09-15	11:22:46	6.29054
2022-09-15	11:22:46	3.39365
2022-09-15	11:22:46	6.81293
2022-09-15	11:22:46	6.3683
2022-09-15	11:22:47	4.08189
2022-09-15	11:22:47	1.96169
2022-09-15	11:22:47	2.41457
2022-09-15	11:22:47	1.34683
2022-09-15	11:22:48	0.283779
2022-09-15	11:22:48	0.132125
2022-09-15	11:22:48	-0.0159667
2022-09-15	11:22:48	1.15406
2022-09-15	11:22:49	0.529478
2022-09-15	11:22:49	0.824695
2022-09-15	11:22:49	3.00826
2022-09-15	11:22:50	4.21106
2022-09-15	11:22:50	4.49446
2022-09-15	11:22:50	4.04418
2022-09-15	11:22:50	5.36555
2022-09-15	11:22:51	5.8136
2022-09-15	11:22:51	5.32693
2022-09-15	11:22:51	1.91523
2022-09-15	11:22:51	9.41604
2022-09-15	11:22:52	6.39803
2022-09-15	11:22:52	4.27161
2022-09-15	11:22:52	2.37513
2022-09-15	11:22:52	1.26454
2022-09-15	11:22:53	5.60281
2022-09-15	11:22:53	4.69324
2022-09-15	11:22:53	7.87543
2022-09-15	11:22:54	3.39024
2022-09-15	11:22:54	7.6652
2022-09-15	11:22:54	7.38159
2022-09-15	11:22:54	5.95243
2022-09-15	11:22:55	7.12815
2022-09-15	11:22:55	4.34423
2022-09-15	11:22:55	6.25304
2022-09-15	11:22:55	8.64372
2022-09-15	11:22:56	6.46963
2022-09-15	11:22:56	9.14846
2022-09-15	11:22:56	11.1248
2022-09-15	11:22:56	8.00164
2022-09-15	11:22:57	16.3237
2022-09-15	11:22:57	15.0788
2022-09-15	11:22:57	11.177
2022-09-15	11:22:58	2.40098
2022-09-15	11:22:58	12.122
2022-09-15	11:22:58	22.6119
2022-09-15	11:22:58	24.6436
2022-09-15	11:22:59	7.76591
2022-09-15	11:22:59	5.14367
2022-09-15	11:22:59	9.56749
2022-09-15	11:22:59	7.63899
2022-09-15	11:23:00	4.34403
2022-09-15	11:23:00	5.32286
2022-09-15	11:23:00	6.60978
2022-09-15	11:23:00	12.5548
2022-09-15	11:23:01	13.9944
2022-09-15	11:23:01	16.41
2022-09-15	11:23:01	12.9278
2022-09-15	11:23:02	14.4307
2022-09-15	11:23:02	13.181
2022-09-15	11:23:02	11.8085
2022-09-15	11:23:02	12.1151
2022-09-15	11:23:03	15.2961
2022-09-15	11:23:03	13.9436
2022-09-15	11:23:03	14.3714
2022-09-15	11:23:03	12.1027
2022-09-15	11:23:04	6.9965
2022-09-15	11:23:04	8.36337
2022-09-15	11:23:04	11.4527
2022-09-15	11:23:04	15.5715
2022-09-15	11:23:05	13.3208
2022-09-15	11:23:05	21.3901
2022-09-15	11:23:05	17.5537
2022-09-15	11:23:06	13.2111
2022-09-15	11:23:06	2.90693
2022-09-15	11:23:06	5.89726
2022-09-15	11:23:06	5.48601
2022-09-15	11:23:07	6.04342
2022-09-15	11:23:07	14.802
2022-09-15	11:23:07	15.3319
2022-09-15	11:23:07	18.5217
2022-09-15	11:23:08	15.5666
2022-09-15	11:23:08	9.22311
2022-09-15	11:23:08	2.7823
2022-09-15	11:23:08	2.09187
2022-09-15	11:23:09	1.36912
2022-09-15	11:23:09	0.990598
2022-09-15	11:23:09	1.12709
2022-09-15	11:23:10	0.778181
2022-09-15	11:23:10	0.917875
2022-09-15	11:23:10	1.0594
2022-09-15	11:23:10	0.595331
2022-09-15	11:23:11	0.452634
2022-09-15	11:23:11	0.398181
2022-09-15	11:23:11	0.441132
2022-09-15	11:23:11	0.441336
2022-09-15	11:23:12	0.469835
2022-09-15	11:23:12	0.670038
2022-09-15	11:23:12	1.12052
2022-09-15	11:23:12	1.48795
2022-09-15	11:23:13	0.96271
2022-09-15	11:23:13	1.22296
2022-09-15	11:23:13	1.16734
2022-09-15	11:23:14	1.08139
2022-09-15	11:23:14	1.20037
2022-09-15	11:23:14	0.776145
2022-09-15	11:23:14	0.298537
2022-09-15	11:23:15	0.00459311
2022-09-15	11:23:15	-0.110369
2022-09-15	11:23:15	-0.209809
2022-09-15	11:23:15	-0.3922
2022-09-15	11:23:16	-0.32818
2022-09-15	11:23:16	-0.569249
2022-09-15	11:23:16	-1.26681
2022-09-15	11:23:16	-0.17388
2022-09-15	11:23:17	0.249529
2022-09-15	11:23:17	1.34693
2022-09-15	11:23:17	5.86652
2022-09-15	11:23:18	12.9691
2022-09-15	11:23:18	10.1021
2022-09-15	11:23:18	13.1597
2022-09-15	11:23:18	9.7082
2022-09-15	11:23:19	19.7426
2022-09-15	11:23:19	19.8362
2022-09-15	11:23:19	8.43217
2022-09-15	11:23:19	8.27441
2022-09-15	11:23:20	0.834466
2022-09-15	11:23:20	3.15233
2022-09-15	11:23:20	5.06464
2022-09-15	11:23:20	6.08138
2022-09-15	11:23:21	10.7255
2022-09-15	11:23:21	8.94215
2022-09-15	11:23:21	7.92652
2022-09-15	11:23:22	9.84734
2022-09-15	11:23:22	8.9026
2022-09-15	11:23:22	3.89263
2022-09-15	11:23:22	2.06088
2022-09-15	11:23:23	0.862812
2022-09-15	11:23:23	1.12057
2022-09-15	11:23:23	0.798639
2022-09-15	11:23:23	1.15253
2022-09-15	11:23:24	2.2221
2022-09-15	11:23:24	6.20652
2022-09-15	11:23:24	6.90332
2022-09-15	11:23:24	2.62469
2022-09-15	11:23:25	1.81762
2022-09-15	11:23:25	1.29788
2022-09-15	11:23:25	1.32322
2022-09-15	11:23:26	1.0879
2022-09-15	11:23:26	2.25635
2022-09-15	11:23:26	1.82388
2022-09-15	11:23:26	3.06586
2022-09-15	11:23:27	1.59207
2022-09-15	11:23:27	2.99843
2022-09-15	11:23:27	1.79391
2022-09-15	11:23:27	3.30159
2022-09-15	11:23:28	3.44347
2022-09-15	11:23:28	3.53523
2022-09-15	11:23:28	1.95752
2022-09-15	11:23:29	1.29192
2022-09-15	11:23:29	0.603473
2022-09-15	11:23:29	0.451565
2022-09-15	11:23:29	0.389377
2022-09-15	11:23:30	0.445662
2022-09-15	11:23:30	0.931361
2022-09-15	11:23:30	0.685204
2022-09-15	11:23:30	1.05406
2022-09-15	11:23:31	1.02729
2022-09-15	11:23:31	1.62368
2022-09-15	11:23:31	1.68139
2022-09-15	11:23:31	3.56744
2022-09-15	11:23:32	1.74724
2022-09-15	11:23:32	1.71411
2022-09-15	11:23:32	0.860776
2022-09-15	11:23:32	0.610649
2022-09-15	11:23:33	0.146934
2022-09-15	11:23:33	0.525916
2022-09-15	11:23:33	0.572837
2022-09-15	11:23:34	0.721946
2022-09-15	11:23:34	0.656908
2022-09-15	11:23:34	0.0769595
2022-09-15	11:23:34	-0.165839
2022-09-15	11:23:35	-0.135152
2022-09-15	11:23:35	-0.208995
2022-09-15	11:23:35	0.343982
2022-09-15	11:23:35	0.296654
2022-09-15	11:23:36	-0.0359667
2022-09-15	11:23:36	-0.325381
2022-09-15	11:23:36	1.13986
2022-09-15	11:23:37	0.697723
2022-09-15	11:23:37	0.811463
2022-09-15	11:23:37	0.593244
2022-09-15	11:23:37	0.59528
2022-09-15	11:23:38	0.44159
2022-09-15	11:23:38	0.376196
2022-09-15	11:23:38	0.499606
2022-09-15	11:23:38	0.499606
2022-09-15	11:23:39	1.09996
2022-09-15	11:23:39	1.19793
2022-09-15	11:23:39	0.83014
2022-09-15	11:23:39	0.562099
2022-09-15	11:23:40	0.482405
2022-09-15	11:23:40	0.492583
2022-09-15	11:23:40	-0.379427
2022-09-15	11:23:40	-0.556526
2022-09-15	11:23:41	-0.850826
2022-09-15	11:23:41	-1.01719
2022-09-15	11:23:41	-1.00263
2022-09-15	11:23:42	-0.932557
2022-09-15	11:23:42	-0.707569
2022-09-15	11:23:42	-0.765686
2022-09-15	11:23:42	-0.726144
2022-09-15	11:23:43	-0.762786
