# Supplementary material for: Comparing efficacy in reducing pulling and welfare impacts of four types of leash walking equipment
Source: PeerJ journal article supplement (doi:10.7717/peerj.18131), 2024-10-24
Supplement: Shelter_2_Tension_files.zip [file Ursula_harness_202291411471 copy.xlsx]

## Sheet: Averaged newtons
Date	Time	Averaged newtons	Impulse	Total steps
2022-09-14	11:47:17	2.01001	2.01001	0		Impulse	815.719
2022-09-14	11:47:18	2.01703	4.02704	0		Total steps	15
2022-09-14	11:47:19	2.88861	6.91565	0		# > 5 sec	1
2022-09-14	11:47:20	2.01465	8.9303	0
2022-09-14	11:47:21	1.87068	10.801	0
2022-09-14	11:47:22	1.87615	12.6771	0
2022-09-14	11:47:23	2.03016	14.7073	0
2022-09-14	11:47:24	1.14952	15.8568	0
2022-09-14	11:47:25	0.0385976	15.8954	0
2022-09-14	11:47:26	-2.94488	15.8954	0
2022-09-14	11:47:27	-3.92183	15.8954	0
2022-09-14	11:47:28	-3.23066	15.8954	0
2022-09-14	11:47:29	0.886018	16.7814	0
2022-09-14	11:47:30	2.14055	18.922	0
2022-09-14	11:47:31	0.0658187	18.9878	0
2022-09-14	11:47:32	0.787378	19.7752	0
2022-09-14	11:47:33	0.700959	20.4761	0
2022-09-14	11:47:34	0.590435	21.0666	0
2022-09-14	11:47:35	0.811826	21.8784	0
2022-09-14	11:47:36	0.0750435	21.9534	0
2022-09-14	11:47:37	-1.74521	21.9534	0
2022-09-14	11:47:38	-1.13248	21.9534	0
2022-09-14	11:47:39	-1.09915	21.9534	0
2022-09-14	11:47:40	-1.03559	21.9534	0
2022-09-14	11:47:41	-0.187039	21.9534	0
2022-09-14	11:47:42	0.446538	22.4	0
2022-09-14	11:47:43	0.904072	23.304	0
2022-09-14	11:47:44	1.92076	25.2248	0
2022-09-14	11:47:45	4.65771	29.8825	0
2022-09-14	11:47:46	5.23519	35.1177	0
2022-09-14	11:47:47	4.92222	40.0399	0
2022-09-14	11:47:48	1.04205	41.082	0
2022-09-14	11:47:49	0.662364	41.7443	0
2022-09-14	11:47:50	-1.28588	41.7443	0
2022-09-14	11:47:51	-2.96235	41.7443	0
2022-09-14	11:47:52	-2.88074	41.7443	0
2022-09-14	11:47:53	-2.62444	41.7443	0
2022-09-14	11:47:54	-2.43608	41.7443	0
2022-09-14	11:47:55	-2.0902	41.7443	0
2022-09-14	11:47:56	-1.21658	41.7443	0
2022-09-14	11:47:57	-0.638706	41.7443	0
2022-09-14	11:47:58	2.25072	43.995	0
2022-09-14	11:47:59	2.10752	46.1026	0
2022-09-14	11:48:00	1.33406	47.4366	0
2022-09-14	11:48:01	1.79648	49.2331	0
2022-09-14	11:48:02	2.12523	51.3583	0
2022-09-14	11:48:03	2.18324	53.5416	0
2022-09-14	11:48:04	2.11182	55.6534	0
2022-09-14	11:48:05	2.16751	57.8209	0
2022-09-14	11:48:06	2.23389	60.0548	0
2022-09-14	11:48:07	2.26909	62.3239	0
2022-09-14	11:48:08	1.57673	63.9006	0
2022-09-14	11:48:09	0.709167	64.6098	0
2022-09-14	11:48:10	-1.6028	64.6098	0
2022-09-14	11:48:11	-2.14181	64.6098	0
2022-09-14	11:48:12	-2.0361	64.6098	0
2022-09-14	11:48:13	-0.844421	64.6098	0
2022-09-14	11:48:14	0.203113	64.8129	0
2022-09-14	11:48:15	3.21788	68.0308	0
2022-09-14	11:48:16	2.20797	70.2388	0
2022-09-14	11:48:17	0.238654	70.4774	0
2022-09-14	11:48:18	0.986811	71.4642	0
2022-09-14	11:48:19	1.4108	72.875	0
2022-09-14	11:48:20	1.11154	73.9866	0
2022-09-14	11:48:21	-1.25381	73.9866	0
2022-09-14	11:48:22	0.245369	74.2319	0
2022-09-14	11:48:23	1.44097	75.6729	0
2022-09-14	11:48:24	2.282	77.9549	0
2022-09-14	11:48:25	0.579117	78.534	0
2022-09-14	11:48:26	0.645442	79.1795	0
2022-09-14	11:48:27	11.9859	91.1653	0
2022-09-14	11:48:28	3.72857	94.8939	0
2022-09-14	11:48:29	3.02144	97.9153	0
2022-09-14	11:48:30	3.22887	101.144	0
2022-09-14	11:48:31	3.3151	104.459	0
2022-09-14	11:48:32	3.02172	107.481	0
2022-09-14	11:48:33	2.61572	110.097	0
2022-09-14	11:48:34	2.39288	112.49	0
2022-09-14	11:48:35	2.42704	114.917	0
2022-09-14	11:48:36	1.99111	116.908	0
2022-09-14	11:48:37	2.19173	119.099	0
2022-09-14	11:48:38	2.46328	121.563	0
2022-09-14	11:48:39	2.0773	123.64	0
2022-09-14	11:48:40	2.04889	125.689	0
2022-09-14	11:48:41	2.18262	127.872	0
2022-09-14	11:48:42	2.00729	129.879	0
2022-09-14	11:48:43	-1.65902	129.879	0
2022-09-14	11:48:44	-2.99727	129.879	0
2022-09-14	11:48:45	-2.66812	129.879	0
2022-09-14	11:48:46	-2.51749	129.879	0
2022-09-14	11:48:47	-2.49569	129.879	0
2022-09-14	11:48:48	-2.46247	129.879	0
2022-09-14	11:48:49	-2.77667	129.879	0
2022-09-14	11:48:50	-2.85788	129.879	0
2022-09-14	11:48:51	-2.41335	129.879	0
2022-09-14	11:48:52	-2.51414	129.879	0
2022-09-14	11:48:53	-2.53519	129.879	0
2022-09-14	11:48:54	-2.47833	129.879	0
2022-09-14	11:48:55	-2.45002	129.879	0
2022-09-14	11:48:56	-2.42545	129.879	0
2022-09-14	11:48:57	-2.5619	129.879	0
2022-09-14	11:48:58	-2.87629	129.879	0
2022-09-14	11:48:59	-3.14899	129.879	0
2022-09-14	11:49:00	-2.78284	129.879	0
2022-09-14	11:49:01	-2.62059	129.879	0
2022-09-14	11:49:02	-2.69595	129.879	0
2022-09-14	11:49:03	-2.32789	129.879	0
2022-09-14	11:49:04	-0.531123	129.879	0
2022-09-14	11:49:05	0.815616	130.694	0
2022-09-14	11:49:06	0.0709878	130.765	0
2022-09-14	11:49:07	-2.31425	130.765	0
2022-09-14	11:49:08	-3.25663	130.765	0
2022-09-14	11:49:09	-2.64718	130.765	0
2022-09-14	11:49:10	-2.35647	130.765	0
2022-09-14	11:49:11	-2.12257	130.765	0
2022-09-14	11:49:12	-0.95704	130.765	0
2022-09-14	11:49:13	-0.480755	130.765	0
2022-09-14	11:49:14	-0.531689	130.765	0
2022-09-14	11:49:15	-0.653364	130.765	0
2022-09-14	11:49:16	-1.30163	130.765	0
2022-09-14	11:49:17	-1.42789	130.765	0
2022-09-14	11:49:18	-1.4906	130.765	0
2022-09-14	11:49:19	-2.10186	130.765	0
2022-09-14	11:49:20	-2.628	130.765	0
2022-09-14	11:49:21	-2.41629	130.765	0
2022-09-14	11:49:22	-2.30584	130.765	0
2022-09-14	11:49:23	-2.15732	130.765	0
2022-09-14	11:49:24	-2.15528	130.765	0
2022-09-14	11:49:25	-1.80916	130.765	0
2022-09-14	11:49:26	-1.8168	130.765	0
2022-09-14	11:49:27	-1.1507	130.765	0
2022-09-14	11:49:28	-0.17589	130.765	0
2022-09-14	11:49:29	0.892188	131.658	0
2022-09-14	11:49:30	0.247934	131.906	0
2022-09-14	11:49:31	-0.0992065	131.906	0
2022-09-14	11:49:32	0.395699	132.301	0
2022-09-14	11:49:33	0.508431	132.81	0
2022-09-14	11:49:34	1.01918	133.829	0
2022-09-14	11:49:35	1.15851	134.987	0
2022-09-14	11:49:36	1.34329	136.331	0
2022-09-14	11:49:37	1.6056	137.936	0
2022-09-14	11:49:38	1.43404	139.37	0
2022-09-14	11:49:39	1.60967	140.98	0
2022-09-14	11:49:40	1.64159	142.622	0
2022-09-14	11:49:41	1.61335	144.235	0
2022-09-14	11:49:42	1.81586	146.051	0
2022-09-14	11:49:43	1.56836	147.619	0
2022-09-14	11:49:44	1.76649	149.386	0
2022-09-14	11:49:45	1.70594	151.092	0
2022-09-14	11:49:46	1.79224	152.884	0
2022-09-14	11:49:47	1.73803	154.622	0
2022-09-14	11:49:48	1.54781	156.17	0
2022-09-14	11:49:49	1.71092	157.881	0
2022-09-14	11:49:50	1.6494	159.53	0
2022-09-14	11:49:51	1.39552	160.926	0
2022-09-14	11:49:52	1.43514	162.361	0
2022-09-14	11:49:53	1.48234	163.843	0
2022-09-14	11:49:54	1.24789	165.091	0
2022-09-14	11:49:55	1.55076	166.642	0
2022-09-14	11:49:56	1.67758	168.319	0
2022-09-14	11:49:57	3.55969	171.879	0
2022-09-14	11:49:58	1.97319	173.852	0
2022-09-14	11:49:59	1.92665	175.779	0
2022-09-14	11:50:00	1.72727	177.506	0
2022-09-14	11:50:01	1.79581	179.302	0
2022-09-14	11:50:02	1.60594	180.908	0
2022-09-14	11:50:03	1.73825	182.646	0
2022-09-14	11:50:04	2.13095	184.777	0
2022-09-14	11:50:05	2.21556	186.993	0
2022-09-14	11:50:06	2.6652	189.658	0
2022-09-14	11:50:07	2.93083	192.589	0
2022-09-14	11:50:08	3.48879	196.077	0
2022-09-14	11:50:09	1.84629	197.924	0
2022-09-14	11:50:10	1.9295	199.853	0
2022-09-14	11:50:11	1.7528	201.606	0
2022-09-14	11:50:12	2.07158	203.678	0
2022-09-14	11:50:13	3.10718	206.785	0
2022-09-14	11:50:14	2.34451	209.129	0
2022-09-14	11:50:15	1.99982	211.129	0
2022-09-14	11:50:16	2.56632	213.695	0
2022-09-14	11:50:17	7.96953	221.665	0
2022-09-14	11:50:18	1.77685	223.442	0
2022-09-14	11:50:19	4.27921	227.721	0
2022-09-14	11:50:20	2.83276	230.554	0
2022-09-14	11:50:21	3.53887	234.093	0
2022-09-14	11:50:22	3.33232	237.425	0
2022-09-14	11:50:23	4.43049	241.855	0
2022-09-14	11:50:24	4.52794	246.383	0
2022-09-14	11:50:25	10.6052	256.988	0
2022-09-14	11:50:26	2.31493	259.303	0
2022-09-14	11:50:27	1.45891	260.762	0
2022-09-14	11:50:28	1.32184	262.084	0
2022-09-14	11:50:29	2.16972	264.254	0
2022-09-14	11:50:30	1.6368	265.891	0
2022-09-14	11:50:31	1.62416	267.515	0
2022-09-14	11:50:32	1.7962	269.311	0
2022-09-14	11:50:33	1.50147	270.812	0
2022-09-14	11:50:34	1.1338	271.946	0
2022-09-14	11:50:35	0.0506517	271.997	0
2022-09-14	11:50:36	1.77679	273.774	0
2022-09-14	11:50:37	-0.059761	273.774	0
2022-09-14	11:50:38	-1.74323	273.774	0
2022-09-14	11:50:39	-1.43474	273.774	0
2022-09-14	11:50:40	-0.85274	273.774	0
2022-09-14	11:50:41	-0.972151	273.774	0
2022-09-14	11:50:42	-0.528368	273.774	0
2022-09-14	11:50:43	0.993601	274.767	0
2022-09-14	11:50:44	1.36128	276.129	0
2022-09-14	11:50:45	1.41782	277.546	0
2022-09-14	11:50:46	1.18345	278.73	0
2022-09-14	11:50:47	0.8425	279.572	0
2022-09-14	11:50:48	0.708204	280.281	0
2022-09-14	11:50:49	0.327731	280.608	0
2022-09-14	11:50:50	0.797942	281.406	0
2022-09-14	11:50:51	0.923256	282.33	0
2022-09-14	11:50:52	1.26463	283.594	0
2022-09-14	11:50:53	0.919974	284.514	0
2022-09-14	11:50:54	0.918372	285.432	0
2022-09-14	11:50:55	1.95715	287.39	0
2022-09-14	11:50:56	1.35698	288.747	0
2022-09-14	11:50:57	1.20413	289.951	0
2022-09-14	11:50:58	1.42657	291.377	0
2022-09-14	11:50:59	2.38941	293.767	0
2022-09-14	11:51:00	10.8063	304.573	0
2022-09-14	11:51:01	14.0071	318.58	1
2022-09-14	11:51:02	10.4695	329.05	1
2022-09-14	11:51:03	18.0235	347.073	2
2022-09-14	11:51:04	23.1885	370.262	3
2022-09-14	11:51:05	27.0408	397.302	4
2022-09-14	11:51:06	17.2184	414.521	5
2022-09-14	11:51:07	4.9551	419.476	5
2022-09-14	11:51:08	5.69421	425.17	5
2022-09-14	11:51:09	10.0599	435.23	5
2022-09-14	11:51:10	11.0294	446.26	5
2022-09-14	11:51:11	6.52493	452.784	5
2022-09-14	11:51:12	13.6634	466.448	6
2022-09-14	11:51:13	18.1378	484.586	7
2022-09-14	11:51:14	28.8111	513.397	8
2022-09-14	11:51:15	27.0744	540.471	9
2022-09-14	11:51:16	25.8483	566.32	10
2022-09-14	11:51:17	23.5839	589.903	11
2022-09-14	11:51:18	18.976	608.879	12
2022-09-14	11:51:19	14.6553	623.535	13
2022-09-14	11:51:20	9.38513	632.92	13
2022-09-14	11:51:21	13.2275	646.147	14
2022-09-14	11:51:22	14.4191	660.566	15
2022-09-14	11:51:23	12.002	672.568	15
2022-09-14	11:51:24	7.26455	679.833	15
2022-09-14	11:51:25	3.27769	683.111	15
2022-09-14	11:51:26	3.26192	686.373	15
2022-09-14	11:51:27	3.26858	689.641	15
2022-09-14	11:51:28	3.27033	692.912	15
2022-09-14	11:51:29	3.26682	696.178	15
2022-09-14	11:51:30	3.26041	699.439	15
2022-09-14	11:51:31	3.26292	702.702	15
2022-09-14	11:51:32	3.27673	705.978	15
2022-09-14	11:51:33	3.2619	709.24	15
2022-09-14	11:51:34	3.2758	712.516	15
2022-09-14	11:51:35	3.26863	715.785	15
2022-09-14	11:51:36	3.25579	719.041	15
2022-09-14	11:51:37	3.26739	722.308	15
2022-09-14	11:51:38	3.26224	725.57	15
2022-09-14	11:51:39	3.25935	728.83	15
2022-09-14	11:51:40	3.28335	732.113	15
2022-09-14	11:51:41	3.26869	735.382	15
2022-09-14	11:51:42	3.27095	738.653	15
2022-09-14	11:51:43	3.27241	741.925	15
2022-09-14	11:51:44	3.25754	745.182	15
2022-09-14	11:51:45	2.45296	747.635	15
2022-09-14	11:51:46	-12.9866	747.635	15
2022-09-14	11:51:47	3.26373	750.899	15
2022-09-14	11:51:48	7.30862	758.208	15
2022-09-14	11:51:49	7.87383	766.082	15
2022-09-14	11:51:50	6.04468	772.126	15
2022-09-14	11:51:51	2.65132	774.778	15
2022-09-14	11:51:52	1.43367	776.211	15
2022-09-14	11:51:53	1.17985	777.391	15
2022-09-14	11:51:54	2.14906	779.54	15
2022-09-14	11:51:55	1.63906	781.179	15
2022-09-14	11:51:56	1.98058	783.16	15
2022-09-14	11:51:57	3.69959	786.859	15
2022-09-14	11:51:58	1.79343	788.653	15
2022-09-14	11:51:59	1.27815	789.931	15
2022-09-14	11:52:00	3.54379	793.475	15
2022-09-14	11:52:01	1.89909	795.374	15
2022-09-14	11:52:02	0.117375	795.491	15
2022-09-14	11:52:03	-0.302903	795.491	15
2022-09-14	11:52:04	-0.174078	795.491	15
2022-09-14	11:52:05	0.657101	796.148	15
2022-09-14	11:52:06	5.19511	801.343	15
2022-09-14	11:52:07	3.28372	804.627	15
2022-09-14	11:52:08	1.41635	806.044	15
2022-09-14	11:52:09	0.161348	806.205	15
2022-09-14	11:52:10	-0.0504232	806.205	15
2022-09-14	11:52:11	-2.01231	806.205	15
2022-09-14	11:52:12	-0.541084	806.205	15
2022-09-14	11:52:13	0.769891	806.975	15
2022-09-14	11:52:14	2.05562	809.03	15
2022-09-14	11:52:15	1.80914	810.84	15
2022-09-14	11:52:16	2.75313	813.593	15
2022-09-14	11:52:17	2.12676	815.719	15

## Sheet: Ursula_harness_202291411471 (4)
Date	Time	Lbs	Newtons	Averaged newtons	Total force x time		total steps > 13.345	**GoPro Fitting: 1136
2022-09-14	11:47:17	0.489936	2.17933	2.01001	2.17933	FALSE	0
2022-09-14	11:47:17	0.445865	1.9833	2.01001	1.9833	FALSE	0
2022-09-14	11:47:17	0.393041	1.74832	2.01001	3.92766	FALSE	0
2022-09-14	11:47:17	0.478639	2.12908	2.01001	4.11238	FALSE	0
2022-09-14	11:47:18	0.417621	1.85766	2.01703	5.78532	FALSE	0
2022-09-14	11:47:18	0.485051	2.1576	2.01703	6.26998	FALSE	0
2022-09-14	11:47:18	0.457672	2.03582	2.01703	7.82114	FALSE	0
2022-09-14	11:47:19	0.884796	3.93575	2.88861	10.2057	FALSE	0
2022-09-14	11:47:19	0.391412	1.74108	2.88861	9.56222	FALSE	0
2022-09-14	11:47:19	0.86103	3.83003	2.88861	14.0358	FALSE	0
2022-09-14	11:47:19	0.460318	2.04759	2.88861	11.6098	FALSE	0
2022-09-14	11:47:20	0.455789	2.02744	2.01465	16.0632	FALSE	0
2022-09-14	11:47:20	0.480522	2.13746	2.01465	13.7473	FALSE	0
2022-09-14	11:47:20	0.430089	1.91312	2.01465	17.9763	FALSE	0
2022-09-14	11:47:20	0.445255	1.98058	2.01465	15.7278	FALSE	0
2022-09-14	11:47:21	0.362405	1.61205	1.87068	19.5884	FALSE	0
2022-09-14	11:47:21	0.482201	2.14493	1.87068	17.8728	FALSE	0
2022-09-14	11:47:21	0.401947	1.78794	1.87068	21.3763	FALSE	0
2022-09-14	11:47:21	0.435636	1.9378	1.87068	19.8106	FALSE	0
2022-09-14	11:47:22	0.358791	1.59597	1.87615	22.9723	FALSE	0
2022-09-14	11:47:22	0.507035	2.25539	1.87615	22.066	FALSE	0
2022-09-14	11:47:22	0.399504	1.77707	1.87615	24.7494	FALSE	0
2022-09-14	11:47:23	0.470751	2.09399	2.03016	24.16	FALSE	0
2022-09-14	11:47:23	0.469784	2.08969	2.03016	26.8391	FALSE	0
2022-09-14	11:47:23	0.450395	2.00345	2.03016	26.1634	FALSE	0
2022-09-14	11:47:23	0.434669	1.93349	2.03016	28.7726	FALSE	0
2022-09-14	11:47:24	0.365916	1.62767	1.14952	27.7911	FALSE	0
2022-09-14	11:47:24	0.31869	1.4176	1.14952	30.1902	FALSE	0
2022-09-14	11:47:24	0.285255	1.26887	1.14952	29.0599	FALSE	0
2022-09-14	11:47:24	0.0638297	0.283927	1.14952	30.4741	FALSE	0
2022-09-14	11:47:25	0.298079	1.32592	0.0385976	30.3859	FALSE	0
2022-09-14	11:47:25	0.126934	0.564628	0.0385976	31.0387	FALSE	0
2022-09-14	11:47:25	-0.0839565	-0.373455	0.0385976	30.3859	FALSE	0
2022-09-14	11:47:25	-0.306348	-1.3627	0.0385976	31.0387	FALSE	0
2022-09-14	11:47:26	-0.489707	-2.17831	-2.94488	30.3859	FALSE	0
2022-09-14	11:47:26	-0.673422	-2.99552	-2.94488	31.0387	FALSE	0
2022-09-14	11:47:26	-0.822989	-3.66082	-2.94488	30.3859	FALSE	0
2022-09-14	11:47:27	-0.891182	-3.96416	-3.92183	31.0387	FALSE	0
2022-09-14	11:47:27	-0.819376	-3.64475	-3.92183	30.3859	FALSE	0
2022-09-14	11:47:27	-0.988485	-4.39698	-3.92183	31.0387	FALSE	0
2022-09-14	11:47:27	-0.82762	-3.68142	-3.92183	30.3859	FALSE	0
2022-09-14	11:47:28	-0.798256	-3.5508	-3.23066	31.0387	FALSE	0
2022-09-14	11:47:28	-0.80248	-3.56959	-3.23066	30.3859	FALSE	0
2022-09-14	11:47:28	-0.869147	-3.86614	-3.23066	31.0387	FALSE	0
2022-09-14	11:47:28	-0.435254	-1.9361	-3.23066	30.3859	FALSE	0
2022-09-14	11:47:29	-0.0247707	-0.110185	0.886018	31.0387	FALSE	0
2022-09-14	11:47:29	0.267697	1.19077	0.886018	31.5766	FALSE	0
2022-09-14	11:47:29	0.355942	1.5833	0.886018	32.622	FALSE	0
2022-09-14	11:47:29	0.197875	0.880188	0.886018	32.4568	FALSE	0
2022-09-14	11:47:30	0.499249	2.22076	2.14055	34.8428	FALSE	0
2022-09-14	11:47:30	0.428563	1.90633	2.14055	34.3631	FALSE	0
2022-09-14	11:47:30	0.51584	2.29456	2.14055	37.1373	FALSE	0
2022-09-14	11:47:31	-0.098562	-0.438423	0.0658187	34.3631	FALSE	0
2022-09-14	11:47:31	0.0459163	0.204245	0.0658187	37.3416	FALSE	0
2022-09-14	11:47:31	0.0234735	0.104415	0.0658187	34.4676	FALSE	0
2022-09-14	11:47:31	0.088359	0.393039	0.0658187	37.7346	FALSE	0
2022-09-14	11:47:32	0.0978756	0.43537	0.787378	34.9029	FALSE	0
2022-09-14	11:47:32	0.13182	0.586362	0.787378	38.321	FALSE	0
2022-09-14	11:47:32	0.267697	1.19077	0.787378	36.0937	FALSE	0
2022-09-14	11:47:32	0.210649	0.937009	0.787378	39.258	FALSE	0
2022-09-14	11:47:33	0.181947	0.809337	0.700959	36.903	FALSE	0
2022-09-14	11:47:33	0.195992	0.871812	0.700959	40.1298	FALSE	0
2022-09-14	11:47:33	0.0647967	0.288229	0.700959	37.1913	FALSE	0
2022-09-14	11:47:33	0.187595	0.83446	0.700959	40.9643	FALSE	0
2022-09-14	11:47:34	0.155433	0.691397	0.590435	37.8827	FALSE	0
2022-09-14	11:47:34	0.182812	0.813184	0.590435	41.7774	FALSE	0
2022-09-14	11:47:34	0.059962	0.266723	0.590435	38.1494	FALSE	0
2022-09-14	11:47:35	0.282405	1.25619	0.811826	43.0336	FALSE	0
2022-09-14	11:47:35	0.103423	0.460046	0.811826	38.6094	FALSE	0
2022-09-14	11:47:35	0.268664	1.19507	0.811826	44.2287	FALSE	0
2022-09-14	11:47:35	0.0755346	0.335993	0.811826	38.9454	FALSE	0
2022-09-14	11:47:36	0.204288	0.908714	0.0750435	45.1374	FALSE	0
2022-09-14	11:47:36	0.166578	0.740972	0.0750435	39.6864	FALSE	0
2022-09-14	11:47:36	-0.0265519	-0.118108	0.0750435	45.1374	FALSE	0
2022-09-14	11:47:36	-0.276832	-1.2314	0.0750435	39.6864	FALSE	0
2022-09-14	11:47:37	-0.434236	-1.93157	-1.74521	45.1374	FALSE	0
2022-09-14	11:47:37	-0.382175	-1.69999	-1.74521	39.6864	FALSE	0
2022-09-14	11:47:37	-0.42304	-1.88177	-1.74521	45.1374	FALSE	0
2022-09-14	11:47:37	-0.32991	-1.46751	-1.74521	39.6864	FALSE	0
2022-09-14	11:47:38	-0.366246	-1.62914	-1.13248	45.1374	FALSE	0
2022-09-14	11:47:38	-0.207722	-0.923989	-1.13248	39.6864	FALSE	0
2022-09-14	11:47:38	-0.189809	-0.844308	-1.13248	45.1374	FALSE	0
2022-09-14	11:47:39	-0.128944	-0.573569	-1.09915	39.6864	FALSE	0
2022-09-14	11:47:39	-0.325687	-1.44872	-1.09915	45.1374	FALSE	0
2022-09-14	11:47:39	-0.275152	-1.22393	-1.09915	39.6864	FALSE	0
2022-09-14	11:47:39	-0.258613	-1.15036	-1.09915	45.1374	FALSE	0
2022-09-14	11:47:40	-0.274745	-1.22212	-1.03559	39.6864	FALSE	0
2022-09-14	11:47:40	-0.322379	-1.43401	-1.03559	45.1374	FALSE	0
2022-09-14	11:47:40	-0.164771	-0.732934	-1.03559	39.6864	FALSE	0
2022-09-14	11:47:40	-0.169351	-0.753307	-1.03559	45.1374	FALSE	0
2022-09-14	11:47:41	0.0958399	0.426315	-0.187039	40.1127	FALSE	0
2022-09-14	11:47:41	-0.14528	-0.646234	-0.187039	45.1374	FALSE	0
2022-09-14	11:47:41	-0.0562211	-0.250083	-0.187039	40.1127	FALSE	0
2022-09-14	11:47:41	-0.0625315	-0.278153	-0.187039	45.1374	FALSE	0
2022-09-14	11:47:42	0.0177738	0.0790614	0.446538	40.1918	FALSE	0
2022-09-14	11:47:42	0.152736	0.6794	0.446538	45.8168	FALSE	0
2022-09-14	11:47:42	0.130649	0.581153	0.446538	40.7729	FALSE	0
2022-09-14	11:47:43	0.201692	0.897166	0.904072	46.714	FALSE	0
2022-09-14	11:47:43	0.180166	0.801414	0.904072	41.5743	FALSE	0
2022-09-14	11:47:43	0.399962	1.77911	0.904072	48.4931	FALSE	0
2022-09-14	11:47:43	0.031158	0.138597	0.904072	41.7129	FALSE	0
2022-09-14	11:47:44	0.279097	1.24148	1.92076	49.7346	FALSE	0
2022-09-14	11:47:44	0.267392	1.18941	1.92076	42.9024	FALSE	0
2022-09-14	11:47:44	0.504389	2.24362	1.92076	51.9782	FALSE	0
2022-09-14	11:47:44	0.676348	3.00853	1.92076	45.9109	FALSE	0
2022-09-14	11:47:45	0.824338	3.66682	4.65771	55.645	FALSE	0
2022-09-14	11:47:45	0.582608	2.59156	4.65771	48.5024	FALSE	0
2022-09-14	11:47:45	1.16454	5.18011	4.65771	60.8251	FALSE	0
2022-09-14	11:47:45	1.61691	7.19234	4.65771	55.6948	FALSE	0
2022-09-14	11:47:46	0.777773	3.45969	5.23519	64.2848	FALSE	0
2022-09-14	11:47:46	1.42917	6.35723	5.23519	62.052	FALSE	0
2022-09-14	11:47:46	1.32383	5.88866	5.23519	70.1735	FALSE	0
2022-09-14	11:47:47	1.62078	7.20955	4.92222	69.2616	FALSE	0
2022-09-14	11:47:47	1.48184	6.59152	4.92222	76.765	FALSE	0
2022-09-14	11:47:47	0.881031	3.919	4.92222	73.1806	FALSE	0
2022-09-14	11:47:47	0.442608	1.96881	4.92222	78.7338	FALSE	0
2022-09-14	11:47:48	0.375484	1.67023	1.04205	74.8508	FALSE	0
2022-09-14	11:47:48	0.347138	1.54414	1.04205	80.2779	FALSE	0
2022-09-14	11:47:48	0.261692	1.16406	1.04205	76.0149	FALSE	0
2022-09-14	11:47:48	-0.0472644	-0.210242	1.04205	80.2779	FALSE	0
2022-09-14	11:47:49	0.0834226	0.37108	0.662364	76.3859	FALSE	0
2022-09-14	11:47:49	0.3164	1.40741	0.662364	81.6854	FALSE	0
2022-09-14	11:47:49	0.309733	1.37775	0.662364	77.7637	FALSE	0
2022-09-14	11:47:49	-0.113931	-0.506788	0.662364	81.6854	FALSE	0
2022-09-14	11:47:50	-0.329554	-1.46592	-1.28588	77.7637	FALSE	0
2022-09-14	11:47:50	-0.301259	-1.34006	-1.28588	81.6854	FALSE	0
2022-09-14	11:47:50	-0.236425	-1.05167	-1.28588	77.7637	FALSE	0
2022-09-14	11:47:51	-0.506654	-2.2537	-2.96235	81.6854	FALSE	0
2022-09-14	11:47:51	-0.654185	-2.90995	-2.96235	77.7637	FALSE	0
2022-09-14	11:47:51	-0.782378	-3.48017	-2.96235	81.6854	FALSE	0
2022-09-14	11:47:51	-0.720648	-3.20559	-2.96235	77.7637	FALSE	0
2022-09-14	11:47:52	-0.726602	-3.23207	-2.88074	81.6854	FALSE	0
2022-09-14	11:47:52	-0.646704	-2.87667	-2.88074	77.7637	FALSE	0
2022-09-14	11:47:52	-0.678409	-3.0177	-2.88074	81.6854	FALSE	0
2022-09-14	11:47:52	-0.538765	-2.39653	-2.88074	77.7637	FALSE	0
2022-09-14	11:47:53	-0.49444	-2.19937	-2.62444	81.6854	FALSE	0
2022-09-14	11:47:53	-0.552506	-2.45766	-2.62444	77.7637	FALSE	0
2022-09-14	11:47:53	-0.647315	-2.87939	-2.62444	81.6854	FALSE	0
2022-09-14	11:47:53	-0.665737	-2.96133	-2.62444	77.7637	FALSE	0
2022-09-14	11:47:54	-0.529656	-2.35602	-2.43608	81.6854	FALSE	0
2022-09-14	11:47:54	-0.545076	-2.42461	-2.43608	77.7637	FALSE	0
2022-09-14	11:47:54	-0.568231	-2.52761	-2.43608	81.6854	FALSE	0
2022-09-14	11:47:55	-0.551132	-2.45155	-2.0902	77.7637	FALSE	0
2022-09-14	11:47:55	-0.4893	-2.1765	-2.0902	81.6854	FALSE	0
2022-09-14	11:47:55	-0.405992	-1.80593	-2.0902	77.7637	FALSE	0
2022-09-14	11:47:55	-0.433168	-1.92682	-2.0902	81.6854	FALSE	0
2022-09-14	11:47:56	-0.303142	-1.34844	-1.21658	77.7637	FALSE	0
2022-09-14	11:47:56	-0.22299	-0.991904	-1.21658	81.6854	FALSE	0
2022-09-14	11:47:56	-0.279834	-1.24476	-1.21658	77.7637	FALSE	0
2022-09-14	11:47:56	-0.288028	-1.28121	-1.21658	81.6854	FALSE	0
2022-09-14	11:47:57	-0.323244	-1.43785	-0.638706	77.7637	FALSE	0
2022-09-14	11:47:57	-0.342379	-1.52297	-0.638706	81.6854	FALSE	0
2022-09-14	11:47:57	0.0234226	0.104188	-0.638706	77.8679	FALSE	0
2022-09-14	11:47:57	0.0678501	0.301811	-0.638706	81.9872	FALSE	0
2022-09-14	11:47:58	0.466272	2.07407	2.25072	79.9419	FALSE	0
2022-09-14	11:47:58	0.567901	2.52614	2.25072	84.5133	FALSE	0
2022-09-14	11:47:58	0.483779	2.15195	2.25072	82.0939	FALSE	0
2022-09-14	11:47:59	0.624542	2.77809	2.10752	87.2914	FALSE	0
2022-09-14	11:47:59	0.585356	2.60378	2.10752	84.6977	FALSE	0
2022-09-14	11:47:59	0.387697	1.72455	2.10752	89.0159	FALSE	0
2022-09-14	11:47:59	0.29757	1.32365	2.10752	86.0213	FALSE	0
2022-09-14	11:48:00	0.295636	1.31505	1.33406	90.331	FALSE	0
2022-09-14	11:48:00	0.279504	1.24329	1.33406	87.2646	FALSE	0
2022-09-14	11:48:00	0.276501	1.22993	1.33406	91.5609	FALSE	0
2022-09-14	11:48:00	0.348003	1.54799	1.33406	88.8126	FALSE	0
2022-09-14	11:48:01	0.366934	1.6322	1.79648	93.1931	FALSE	0
2022-09-14	11:48:01	0.355331	1.58058	1.79648	90.3932	FALSE	0
2022-09-14	11:48:01	0.426221	1.89592	1.79648	95.089	FALSE	0
2022-09-14	11:48:01	0.466985	2.07724	1.79648	92.4704	FALSE	0
2022-09-14	11:48:02	0.464949	2.06819	2.12523	97.1572	FALSE	0
2022-09-14	11:48:02	0.486018	2.16191	2.12523	94.6323	FALSE	0
2022-09-14	11:48:02	0.482354	2.14561	2.12523	99.3028	FALSE	0
2022-09-14	11:48:03	0.473244	2.10508	2.18324	96.7374	FALSE	0
2022-09-14	11:48:03	0.476552	2.1198	2.18324	101.423	FALSE	0
2022-09-14	11:48:03	0.511209	2.27396	2.18324	99.0114	FALSE	0
2022-09-14	11:48:03	0.502252	2.23412	2.18324	103.657	FALSE	0
2022-09-14	11:48:04	0.46271	2.05823	2.11182	101.07	FALSE	0
2022-09-14	11:48:04	0.441081	1.96202	2.11182	105.619	FALSE	0
2022-09-14	11:48:04	0.500725	2.22732	2.11182	103.297	FALSE	0
2022-09-14	11:48:04	0.494516	2.19971	2.11182	107.818	FALSE	0
2022-09-14	11:48:05	0.450191	2.00254	2.16751	105.299	FALSE	0
2022-09-14	11:48:05	0.501794	2.23208	2.16751	110.051	FALSE	0
2022-09-14	11:48:05	0.496247	2.20741	2.16751	107.507	FALSE	0
2022-09-14	11:48:05	0.500878	2.22801	2.16751	112.279	FALSE	0
2022-09-14	11:48:06	0.485611	2.16009	2.23389	109.667	FALSE	0
2022-09-14	11:48:06	0.498588	2.21782	2.23389	114.496	FALSE	0
2022-09-14	11:48:06	0.522404	2.32376	2.23389	111.991	FALSE	0
2022-09-14	11:48:07	0.500063	2.22438	2.26909	116.721	FALSE	0
2022-09-14	11:48:07	0.496756	2.20967	2.26909	114.2	FALSE	0
2022-09-14	11:48:07	0.529529	2.35545	2.26909	119.076	FALSE	0
2022-09-14	11:48:07	0.51411	2.28686	2.26909	116.487	FALSE	0
2022-09-14	11:48:08	0.477468	2.12387	1.57673	121.2	FALSE	0
2022-09-14	11:48:08	0.408257	1.81601	1.57673	118.303	FALSE	0
2022-09-14	11:48:08	0.386629	1.7198	1.57673	122.92	FALSE	0
2022-09-14	11:48:08	0.145509	0.647253	1.57673	118.951	FALSE	0
2022-09-14	11:48:09	0.0255601	0.113696	0.709167	123.034	FALSE	0
2022-09-14	11:48:09	0.659453	2.93338	0.709167	121.884	FALSE	0
2022-09-14	11:48:09	0.446323	1.98533	0.709167	125.019	FALSE	0
2022-09-14	11:48:09	-0.493625	-2.19574	0.709167	121.884	FALSE	0
2022-09-14	11:48:10	-0.336781	-1.49807	-1.6028	125.019	FALSE	0
2022-09-14	11:48:10	-0.401666	-1.78669	-1.6028	121.884	FALSE	0
2022-09-14	11:48:10	-0.342531	-1.52365	-1.6028	125.019	FALSE	0
2022-09-14	11:48:11	-0.455966	-2.02823	-2.14181	121.884	FALSE	0
2022-09-14	11:48:11	-0.502073	-2.23332	-2.14181	125.019	FALSE	0
2022-09-14	11:48:11	-0.466043	-2.07305	-2.14181	121.884	FALSE	0
2022-09-14	11:48:11	-0.501921	-2.23264	-2.14181	125.019	FALSE	0
2022-09-14	11:48:12	-0.574185	-2.55409	-2.0361	121.884	FALSE	0
2022-09-14	11:48:12	-0.478867	-2.1301	-2.0361	125.019	FALSE	0
2022-09-14	11:48:12	-0.385534	-1.71493	-2.0361	121.884	FALSE	0
2022-09-14	11:48:12	-0.392353	-1.74526	-2.0361	125.019	FALSE	0
2022-09-14	11:48:13	-0.474491	-2.11063	-0.844421	121.884	FALSE	0
2022-09-14	11:48:13	-0.155101	-0.68992	-0.844421	125.019	FALSE	0
2022-09-14	11:48:13	-0.123855	-0.550932	-0.844421	121.884	FALSE	0
2022-09-14	11:48:13	-0.00589033	-0.0262014	-0.844421	125.019	FALSE	0
2022-09-14	11:48:14	-0.090216	-0.401299	0.203113	121.884	FALSE	0
2022-09-14	11:48:14	0.174415	0.775833	0.203113	125.795	FALSE	0
2022-09-14	11:48:14	0.0527865	0.234805	0.203113	122.119	FALSE	0
2022-09-14	11:48:15	0.227952	1.01398	3.21788	126.809	FALSE	0
2022-09-14	11:48:15	0.551005	2.45098	3.21788	124.57	FALSE	0
2022-09-14	11:48:15	1.21905	5.42258	3.21788	132.231	FALSE	0
2022-09-14	11:48:15	0.895636	3.98397	3.21788	128.554	FALSE	0
2022-09-14	11:48:16	0.620267	2.75907	2.20797	134.99	FALSE	0
2022-09-14	11:48:16	0.504084	2.24227	2.20797	130.796	FALSE	0
2022-09-14	11:48:16	0.392735	1.74696	2.20797	136.737	FALSE	0
2022-09-14	11:48:16	0.46841	2.08358	2.20797	132.88	FALSE	0
2022-09-14	11:48:17	0.259657	1.15501	0.238654	137.892	FALSE	0
2022-09-14	11:48:17	0.0593005	0.26378	0.238654	133.143	FALSE	0
2022-09-14	11:48:17	-0.146348	-0.650985	0.238654	137.892	FALSE	0
2022-09-14	11:48:17	0.0419977	0.186814	0.238654	133.33	FALSE	0
2022-09-14	11:48:18	0.226883	1.00922	0.986811	138.902	FALSE	0
2022-09-14	11:48:18	0.323626	1.43955	0.986811	134.77	FALSE	0
2022-09-14	11:48:18	0.115026	0.511659	0.986811	139.413	FALSE	0
2022-09-14	11:48:19	0.37472	1.66683	1.4108	136.436	FALSE	0
2022-09-14	11:48:19	0.314262	1.3979	1.4108	140.811	FALSE	0
2022-09-14	11:48:19	0.395687	1.76009	1.4108	138.197	FALSE	0
2022-09-14	11:48:19	0.183982	0.818389	1.4108	141.63	FALSE	0
2022-09-14	11:48:20	0.347697	1.54663	1.11154	139.743	FALSE	0
2022-09-14	11:48:20	0.265713	1.18194	1.11154	142.811	FALSE	0
2022-09-14	11:48:20	0.352583	1.56836	1.11154	141.312	FALSE	0
2022-09-14	11:48:20	0.0335498	0.149236	1.11154	142.961	FALSE	0
2022-09-14	11:48:21	-0.185839	-0.826649	-1.25381	141.312	FALSE	0
2022-09-14	11:48:21	-0.266552	-1.18568	-1.25381	142.961	FALSE	0
2022-09-14	11:48:21	-0.285432	-1.26966	-1.25381	141.312	FALSE	0
2022-09-14	11:48:21	-0.389656	-1.73327	-1.25381	142.961	FALSE	0
2022-09-14	11:48:22	-0.130369	-0.579907	0.245369	141.312	FALSE	0
2022-09-14	11:48:22	0.0794022	0.353197	0.245369	143.314	FALSE	0
2022-09-14	11:48:22	0.216451	0.962817	0.245369	142.274	FALSE	0
2022-09-14	11:48:23	0.146985	0.653819	1.44097	143.968	FALSE	0
2022-09-14	11:48:23	0.360573	1.6039	1.44097	143.878	FALSE	0
2022-09-14	11:48:23	0.384746	1.71143	1.44097	145.679	FALSE	0
2022-09-14	11:48:23	0.403473	1.79473	1.44097	145.673	FALSE	0
2022-09-14	11:48:24	0.494466	2.19948	2.282	147.879	FALSE	0
2022-09-14	11:48:24	0.612277	2.72353	2.282	148.397	FALSE	0
2022-09-14	11:48:24	0.468054	2.082	2.282	149.961	FALSE	0
2022-09-14	11:48:24	0.477265	2.12297	2.282	150.52	FALSE	0
2022-09-14	11:48:25	0.442863	1.96994	0.579117	151.931	FALSE	0
2022-09-14	11:48:25	0.514415	2.28822	0.579117	152.808	FALSE	0
2022-09-14	11:48:25	-0.178613	-0.794506	0.579117	151.931	FALSE	0
2022-09-14	11:48:25	-0.2579	-1.14719	0.579117	152.808	FALSE	0
2022-09-14	11:48:26	0.0550766	0.244992	0.645442	152.176	FALSE	0
2022-09-14	11:48:26	0.137672	0.612393	0.645442	153.42	FALSE	0
2022-09-14	11:48:26	0.242557	1.07894	0.645442	153.254	FALSE	0
2022-09-14	11:48:27	0.699962	3.11357	11.9859	156.534	FALSE	0
2022-09-14	11:48:27	2.15217	9.57328	11.9859	162.828	FALSE	0
2022-09-14	11:48:27	3.67971	16.3681	11.9859	172.902	1	1
2022-09-14	11:48:27	4.24632	18.8885	11.9859	181.716	1	2
2022-09-14	11:48:28	1.21238	5.39291	3.72857	178.295	FALSE	2
2022-09-14	11:48:28	1.00373	4.46479	3.72857	186.181	FALSE	2
2022-09-14	11:48:28	0.611514	2.72014	3.72857	181.015	FALSE	2
2022-09-14	11:48:28	0.525254	2.33643	3.72857	188.517	FALSE	2
2022-09-14	11:48:29	0.638791	2.84147	3.02144	183.856	FALSE	2
2022-09-14	11:48:29	0.786781	3.49976	3.02144	192.017	FALSE	2
2022-09-14	11:48:29	0.653244	2.90576	3.02144	186.762	FALSE	2
2022-09-14	11:48:29	0.63818	2.83875	3.02144	194.856	FALSE	2
2022-09-14	11:48:30	0.691463	3.07577	3.22887	189.838	FALSE	2
2022-09-14	11:48:30	0.745713	3.31708	3.22887	198.173	FALSE	2
2022-09-14	11:48:30	0.740471	3.29376	3.22887	193.132	FALSE	2
2022-09-14	11:48:31	0.689886	3.06875	3.3151	201.242	FALSE	2
2022-09-14	11:48:31	0.752532	3.34741	3.3151	196.479	FALSE	2
2022-09-14	11:48:31	0.716807	3.1885	3.3151	204.43	FALSE	2
2022-09-14	11:48:31	0.821845	3.65573	3.3151	200.135	FALSE	2
2022-09-14	11:48:32	0.839707	3.73518	3.02172	208.166	FALSE	2
2022-09-14	11:48:32	0.621031	2.76247	3.02172	202.897	FALSE	2
2022-09-14	11:48:32	0.620369	2.75953	3.02172	210.925	FALSE	2
2022-09-14	11:48:32	0.636145	2.8297	3.02172	205.727	FALSE	2
2022-09-14	11:48:33	0.640165	2.84758	2.61572	213.773	FALSE	2
2022-09-14	11:48:33	0.646934	2.87769	2.61572	208.605	FALSE	2
2022-09-14	11:48:33	0.54383	2.41906	2.61572	216.192	FALSE	2
2022-09-14	11:48:33	0.521234	2.31855	2.61572	210.923	FALSE	2
2022-09-14	11:48:34	0.515178	2.29161	2.39288	218.483	FALSE	2
2022-09-14	11:48:34	0.52673	2.343	2.39288	213.266	FALSE	2
2022-09-14	11:48:34	0.571921	2.54402	2.39288	221.027	FALSE	2
2022-09-14	11:48:35	0.599199	2.66536	2.42704	215.931	FALSE	2
2022-09-14	11:48:35	0.600522	2.67124	2.42704	223.699	FALSE	2
2022-09-14	11:48:35	0.504237	2.24295	2.42704	218.174	FALSE	2
2022-09-14	11:48:35	0.478537	2.12863	2.42704	225.827	FALSE	2
2022-09-14	11:48:36	0.430496	1.91493	1.99111	220.089	FALSE	2
2022-09-14	11:48:36	0.42729	1.90067	1.99111	227.728	FALSE	2
2022-09-14	11:48:36	0.458028	2.0374	1.99111	222.127	FALSE	2
2022-09-14	11:48:36	0.474669	2.11142	1.99111	229.839	FALSE	2
2022-09-14	11:48:37	0.423524	1.88392	2.19173	224.011	FALSE	2
2022-09-14	11:48:37	0.524898	2.33485	2.19173	232.174	FALSE	2
2022-09-14	11:48:37	0.469733	2.08947	2.19173	226.1	FALSE	2
2022-09-14	11:48:37	0.552736	2.45868	2.19173	234.633	FALSE	2
2022-09-14	11:48:38	0.575433	2.55964	2.46328	228.66	FALSE	2
2022-09-14	11:48:38	0.551107	2.45143	2.46328	237.084	FALSE	2
2022-09-14	11:48:38	0.534771	2.37877	2.46328	231.039	FALSE	2
2022-09-14	11:48:39	0.455433	2.02586	2.0773	239.11	FALSE	2
2022-09-14	11:48:39	0.497519	2.21306	2.0773	233.252	FALSE	2
2022-09-14	11:48:39	0.453244	2.01612	2.0773	241.126	FALSE	2
2022-09-14	11:48:39	0.461794	2.05415	2.0773	235.306	FALSE	2
2022-09-14	11:48:40	0.467952	2.08154	2.04889	243.208	FALSE	2
2022-09-14	11:48:40	0.471412	2.09693	2.04889	237.403	FALSE	2
2022-09-14	11:48:40	0.435331	1.93644	2.04889	245.144	FALSE	2
2022-09-14	11:48:40	0.467748	2.08064	2.04889	239.483	FALSE	2
2022-09-14	11:48:41	0.502303	2.23434	2.18262	247.379	FALSE	2
2022-09-14	11:48:41	0.45869	2.04034	2.18262	241.524	FALSE	2
2022-09-14	11:48:41	0.437774	1.94731	2.18262	249.326	FALSE	2
2022-09-14	11:48:41	0.563931	2.50848	2.18262	244.032	FALSE	2
2022-09-14	11:48:42	0.491158	2.18477	2.00729	251.511	FALSE	2
2022-09-14	11:48:42	0.499249	2.22076	2.00729	246.253	FALSE	2
2022-09-14	11:48:42	0.363372	1.61635	2.00729	253.127	FALSE	2
2022-09-14	11:48:43	-0.0848216	-0.377303	-1.65902	246.253	FALSE	2
2022-09-14	11:48:43	-0.354185	-1.57549	-1.65902	253.127	FALSE	2
2022-09-14	11:48:43	-0.50645	-2.25279	-1.65902	246.253	FALSE	2
2022-09-14	11:48:43	-0.546399	-2.43049	-1.65902	253.127	FALSE	2
2022-09-14	11:48:44	-0.743396	-3.30677	-2.99727	246.253	FALSE	2
2022-09-14	11:48:44	-0.651539	-2.89818	-2.99727	253.127	FALSE	2
2022-09-14	11:48:44	-0.712302	-3.16846	-2.99727	246.253	FALSE	2
2022-09-14	11:48:44	-0.588027	-2.61566	-2.99727	253.127	FALSE	2
2022-09-14	11:48:45	-0.642938	-2.85992	-2.66812	246.253	FALSE	2
2022-09-14	11:48:45	-0.601361	-2.67497	-2.66812	253.127	FALSE	2
2022-09-14	11:48:45	-0.630419	-2.80423	-2.66812	246.253	FALSE	2
2022-09-14	11:48:45	-0.524567	-2.33338	-2.66812	253.127	FALSE	2
2022-09-14	11:48:46	-0.556882	-2.47712	-2.51749	246.253	FALSE	2
2022-09-14	11:48:46	-0.535916	-2.38386	-2.51749	253.127	FALSE	2
2022-09-14	11:48:46	-0.605076	-2.6915	-2.51749	246.253	FALSE	2
2022-09-14	11:48:47	-0.51505	-2.29105	-2.49569	253.127	FALSE	2
2022-09-14	11:48:47	-0.507824	-2.2589	-2.49569	246.253	FALSE	2
2022-09-14	11:48:47	-0.621361	-2.76394	-2.49569	253.127	FALSE	2
2022-09-14	11:48:47	-0.599987	-2.66886	-2.49569	246.253	FALSE	2
2022-09-14	11:48:48	-0.588282	-2.6168	-2.46247	253.127	FALSE	2
2022-09-14	11:48:48	-0.453676	-2.01804	-2.46247	246.253	FALSE	2
2022-09-14	11:48:48	-0.561666	-2.4984	-2.46247	253.127	FALSE	2
2022-09-14	11:48:48	-0.610725	-2.71663	-2.46247	246.253	FALSE	2
2022-09-14	11:48:49	-0.676933	-3.01113	-2.77667	253.127	FALSE	2
2022-09-14	11:48:49	-0.657951	-2.9267	-2.77667	246.253	FALSE	2
2022-09-14	11:48:49	-0.549351	-2.44362	-2.77667	253.127	FALSE	2
2022-09-14	11:48:49	-0.612659	-2.72523	-2.77667	246.253	FALSE	2
2022-09-14	11:48:50	-0.604516	-2.68901	-2.85788	253.127	FALSE	2
2022-09-14	11:48:50	-0.686399	-3.05324	-2.85788	246.253	FALSE	2
2022-09-14	11:48:50	-0.636526	-2.83139	-2.85788	253.127	FALSE	2
2022-09-14	11:48:51	-0.513066	-2.28222	-2.41335	246.253	FALSE	2
2022-09-14	11:48:51	-0.527926	-2.34832	-2.41335	253.127	FALSE	2
2022-09-14	11:48:51	-0.575254	-2.55884	-2.41335	246.253	FALSE	2
2022-09-14	11:48:51	-0.553931	-2.464	-2.41335	253.127	FALSE	2
2022-09-14	11:48:52	-0.555152	-2.46943	-2.51414	246.253	FALSE	2
2022-09-14	11:48:52	-0.556017	-2.47327	-2.51414	253.127	FALSE	2
2022-09-14	11:48:52	-0.574084	-2.55364	-2.51414	246.253	FALSE	2
2022-09-14	11:48:52	-0.575559	-2.5602	-2.51414	253.127	FALSE	2
2022-09-14	11:48:53	-0.572659	-2.5473	-2.53519	246.253	FALSE	2
2022-09-14	11:48:53	-0.571285	-2.54119	-2.53519	253.127	FALSE	2
2022-09-14	11:48:53	-0.569452	-2.53304	-2.53519	246.253	FALSE	2
2022-09-14	11:48:53	-0.566348	-2.51923	-2.53519	253.127	FALSE	2
2022-09-14	11:48:54	-0.562786	-2.50338	-2.47833	246.253	FALSE	2
2022-09-14	11:48:54	-0.556221	-2.47418	-2.47833	253.127	FALSE	2
2022-09-14	11:48:54	-0.552455	-2.45743	-2.47833	246.253	FALSE	2
2022-09-14	11:48:55	-0.554236	-2.46535	-2.45002	253.127	FALSE	2
2022-09-14	11:48:55	-0.550318	-2.44792	-2.45002	246.253	FALSE	2
2022-09-14	11:48:55	-0.547162	-2.43389	-2.45002	253.127	FALSE	2
2022-09-14	11:48:55	-0.551437	-2.4529	-2.45002	246.253	FALSE	2
2022-09-14	11:48:56	-0.549045	-2.44226	-2.42545	253.127	FALSE	2
2022-09-14	11:48:56	-0.544872	-2.4237	-2.42545	246.253	FALSE	2
2022-09-14	11:48:56	-0.545941	-2.42845	-2.42545	253.127	FALSE	2
2022-09-14	11:48:56	-0.541208	-2.4074	-2.42545	246.253	FALSE	2
2022-09-14	11:48:57	-0.544262	-2.42099	-2.5619	253.127	FALSE	2
2022-09-14	11:48:57	-0.551081	-2.45132	-2.5619	246.253	FALSE	2
2022-09-14	11:48:57	-0.581819	-2.58805	-2.5619	253.127	FALSE	2
2022-09-14	11:48:57	-0.626603	-2.78726	-2.5619	246.253	FALSE	2
2022-09-14	11:48:58	-0.62533	-2.78159	-2.87629	253.127	FALSE	2
2022-09-14	11:48:58	-0.688485	-3.06252	-2.87629	246.253	FALSE	2
2022-09-14	11:48:58	-0.626043	-2.78476	-2.87629	253.127	FALSE	2
2022-09-14	11:48:59	-0.650979	-2.89568	-3.14899	246.253	FALSE	2
2022-09-14	11:48:59	-0.848587	-3.77468	-3.14899	253.127	FALSE	2
2022-09-14	11:48:59	-0.6465	-2.87576	-3.14899	246.253	FALSE	2
2022-09-14	11:48:59	-0.685635	-3.04984	-3.14899	253.127	FALSE	2
2022-09-14	11:49:00	-0.665788	-2.96156	-2.78284	246.253	FALSE	2
2022-09-14	11:49:00	-0.658104	-2.92738	-2.78284	253.127	FALSE	2
2022-09-14	11:49:00	-0.607926	-2.70418	-2.78284	246.253	FALSE	2
2022-09-14	11:49:00	-0.570623	-2.53825	-2.78284	253.127	FALSE	2
2022-09-14	11:49:01	-0.642226	-2.85675	-2.62059	246.253	FALSE	2
2022-09-14	11:49:01	-0.562379	-2.50157	-2.62059	253.127	FALSE	2
2022-09-14	11:49:01	-0.633066	-2.816	-2.62059	246.253	FALSE	2
2022-09-14	11:49:01	-0.518867	-2.30802	-2.62059	253.127	FALSE	2
2022-09-14	11:49:02	-0.60589	-2.69512	-2.69595	246.253	FALSE	2
2022-09-14	11:49:02	-0.573778	-2.55228	-2.69595	253.127	FALSE	2
2022-09-14	11:49:02	-0.638561	-2.84045	-2.69595	246.253	FALSE	2
2022-09-14	11:49:03	-0.741819	-3.29976	-2.32789	253.127	FALSE	2
2022-09-14	11:49:03	-0.549198	-2.44294	-2.32789	246.253	FALSE	2
2022-09-14	11:49:03	-0.445737	-1.98273	-2.32789	253.127	FALSE	2
2022-09-14	11:49:03	-0.356577	-1.58613	-2.32789	246.253	FALSE	2
2022-09-14	11:49:04	-0.310572	-1.38149	-0.531123	253.127	FALSE	2
2022-09-14	11:49:04	-0.167621	-0.745612	-0.531123	246.253	FALSE	2
2022-09-14	11:49:04	-0.0966791	-0.430048	-0.531123	253.127	FALSE	2
2022-09-14	11:49:04	0.0972648	0.432653	-0.531123	246.686	FALSE	2
2022-09-14	11:49:05	0.150293	0.668533	0.815616	253.796	FALSE	2
2022-09-14	11:49:05	0.202303	0.899884	0.815616	247.585	FALSE	2
2022-09-14	11:49:05	0.1993	0.886526	0.815616	254.682	FALSE	2
2022-09-14	11:49:05	0.181539	0.807522	0.815616	248.393	FALSE	2
2022-09-14	11:49:06	0.122405	0.544482	0.0709878	255.227	FALSE	2
2022-09-14	11:49:06	-0.00538142	-0.0239376	0.0709878	248.393	FALSE	2
2022-09-14	11:49:06	-0.0691473	-0.307581	0.0709878	255.227	FALSE	2
2022-09-14	11:49:07	-0.159122	-0.707806	-2.31425	248.393	FALSE	2
2022-09-14	11:49:07	-0.445025	-1.97956	-2.31425	255.227	FALSE	2
2022-09-14	11:49:07	-0.687417	-3.05777	-2.31425	248.393	FALSE	2
2022-09-14	11:49:07	-0.789503	-3.51187	-2.31425	255.227	FALSE	2
2022-09-14	11:49:08	-0.646602	-2.87622	-3.25663	248.393	FALSE	2
2022-09-14	11:49:08	-0.826399	-3.67599	-3.25663	255.227	FALSE	2
2022-09-14	11:49:08	-0.723243	-3.21713	-3.25663	248.393	FALSE	2
2022-09-14	11:49:08	-0.732251	-3.2572	-3.25663	255.227	FALSE	2
2022-09-14	11:49:09	-0.63963	-2.8452	-2.64718	248.393	FALSE	2
2022-09-14	11:49:09	-0.665432	-2.95997	-2.64718	255.227	FALSE	2
2022-09-14	11:49:09	-0.518358	-2.30576	-2.64718	248.393	FALSE	2
2022-09-14	11:49:09	-0.557035	-2.4778	-2.64718	255.227	FALSE	2
2022-09-14	11:49:10	-0.590623	-2.62721	-2.35647	248.393	FALSE	2
2022-09-14	11:49:10	-0.471437	-2.09705	-2.35647	255.227	FALSE	2
2022-09-14	11:49:10	-0.527213	-2.34515	-2.35647	248.393	FALSE	2
2022-09-14	11:49:11	-0.505941	-2.25053	-2.12257	255.227	FALSE	2
2022-09-14	11:49:11	-0.561412	-2.49727	-2.12257	248.393	FALSE	2
2022-09-14	11:49:11	-0.400852	-1.78307	-2.12257	255.227	FALSE	2
2022-09-14	11:49:11	-0.440496	-1.95941	-2.12257	248.393	FALSE	2
2022-09-14	11:49:12	-0.211946	-0.942778	-0.95704	255.227	FALSE	2
2022-09-14	11:49:12	-0.297544	-1.32354	-0.95704	248.393	FALSE	2
2022-09-14	11:49:12	-0.247926	-1.10282	-0.95704	255.227	FALSE	2
2022-09-14	11:49:12	-0.103193	-0.459023	-0.95704	248.393	FALSE	2
2022-09-14	11:49:13	-0.0872135	-0.387943	-0.480755	255.227	FALSE	2
2022-09-14	11:49:13	-0.120852	-0.537574	-0.480755	248.393	FALSE	2
2022-09-14	11:49:13	-0.178664	-0.794733	-0.480755	255.227	FALSE	2
2022-09-14	11:49:13	-0.045585	-0.202771	-0.480755	248.393	FALSE	2
2022-09-14	11:49:14	-0.0977987	-0.435028	-0.531689	255.227	FALSE	2
2022-09-14	11:49:14	-0.0443636	-0.197338	-0.531689	248.393	FALSE	2
2022-09-14	11:49:14	-0.216425	-0.962702	-0.531689	255.227	FALSE	2
2022-09-14	11:49:15	-0.231743	-1.03084	-0.653364	248.393	FALSE	2
2022-09-14	11:49:15	-0.0512847	-0.228125	-0.653364	255.227	FALSE	2
2022-09-14	11:49:15	-0.127773	-0.56836	-0.653364	248.393	FALSE	2
2022-09-14	11:49:15	-0.17673	-0.78613	-0.653364	255.227	FALSE	2
2022-09-14	11:49:16	-0.324872	-1.4451	-1.30163	248.393	FALSE	2
2022-09-14	11:49:16	-0.261717	-1.16417	-1.30163	255.227	FALSE	2
2022-09-14	11:49:16	-0.268893	-1.19609	-1.30163	248.393	FALSE	2
2022-09-14	11:49:16	-0.315	-1.40118	-1.30163	255.227	FALSE	2
2022-09-14	11:49:17	-0.314033	-1.39688	-1.42789	248.393	FALSE	2
2022-09-14	11:49:17	-0.345737	-1.53791	-1.42789	255.227	FALSE	2
2022-09-14	11:49:17	-0.348944	-1.55217	-1.42789	248.393	FALSE	2
2022-09-14	11:49:17	-0.275305	-1.22461	-1.42789	255.227	FALSE	2
2022-09-14	11:49:18	-0.255712	-1.13746	-1.4906	248.393	FALSE	2
2022-09-14	11:49:18	-0.338766	-1.5069	-1.4906	255.227	FALSE	2
2022-09-14	11:49:18	-0.410827	-1.82744	-1.4906	248.393	FALSE	2
2022-09-14	11:49:19	-0.398664	-1.77334	-2.10186	255.227	FALSE	2
2022-09-14	11:49:19	-0.396323	-1.76292	-2.10186	248.393	FALSE	2
2022-09-14	11:49:19	-0.495661	-2.2048	-2.10186	255.227	FALSE	2
2022-09-14	11:49:19	-0.599427	-2.66637	-2.10186	248.393	FALSE	2
2022-09-14	11:49:20	-0.665076	-2.95839	-2.628	255.227	FALSE	2
2022-09-14	11:49:20	-0.521157	-2.31821	-2.628	248.393	FALSE	2
2022-09-14	11:49:20	-0.553829	-2.46354	-2.628	255.227	FALSE	2
2022-09-14	11:49:20	-0.623142	-2.77186	-2.628	248.393	FALSE	2
2022-09-14	11:49:21	-0.56645	-2.51968	-2.41629	255.227	FALSE	2
2022-09-14	11:49:21	-0.608435	-2.70644	-2.41629	248.393	FALSE	2
2022-09-14	11:49:21	-0.473829	-2.10769	-2.41629	255.227	FALSE	2
2022-09-14	11:49:21	-0.524109	-2.33134	-2.41629	248.393	FALSE	2
2022-09-14	11:49:22	-0.485839	-2.16111	-2.30584	255.227	FALSE	2
2022-09-14	11:49:22	-0.514999	-2.29082	-2.30584	248.393	FALSE	2
2022-09-14	11:49:22	-0.554287	-2.46558	-2.30584	255.227	FALSE	2
2022-09-14	11:49:23	-0.419936	-1.86796	-2.15732	248.393	FALSE	2
2022-09-14	11:49:23	-0.47271	-2.10271	-2.15732	255.227	FALSE	2
2022-09-14	11:49:23	-0.480903	-2.13915	-2.15732	248.393	FALSE	2
2022-09-14	11:49:23	-0.566399	-2.51946	-2.15732	255.227	FALSE	2
2022-09-14	11:49:24	-0.437799	-1.94742	-2.15528	248.393	FALSE	2
2022-09-14	11:49:24	-0.458816	-2.04091	-2.15528	255.227	FALSE	2
2022-09-14	11:49:24	-0.539885	-2.40152	-2.15528	248.393	FALSE	2
2022-09-14	11:49:24	-0.501615	-2.23128	-2.15528	255.227	FALSE	2
2022-09-14	11:49:25	-0.522022	-2.32206	-1.80916	248.393	FALSE	2
2022-09-14	11:49:25	-0.308079	-1.3704	-1.80916	255.227	FALSE	2
2022-09-14	11:49:25	-0.359529	-1.59926	-1.80916	248.393	FALSE	2
2022-09-14	11:49:25	-0.437239	-1.94493	-1.80916	255.227	FALSE	2
2022-09-14	11:49:26	-0.430419	-1.91459	-1.8168	248.393	FALSE	2
2022-09-14	11:49:26	-0.512964	-2.28177	-1.8168	255.227	FALSE	2
2022-09-14	11:49:26	-0.281921	-1.25404	-1.8168	248.393	FALSE	2
2022-09-14	11:49:27	-0.272353	-1.21148	-1.1507	255.227	FALSE	2
2022-09-14	11:49:27	-0.260496	-1.15874	-1.1507	248.393	FALSE	2
2022-09-14	11:49:27	-0.315916	-1.40526	-1.1507	255.227	FALSE	2
2022-09-14	11:49:27	-0.185992	-0.82733	-1.1507	248.393	FALSE	2
2022-09-14	11:49:28	-0.109707	-0.487999	-0.17589	255.227	FALSE	2
2022-09-14	11:49:28	-0.234745	-1.04419	-0.17589	248.393	FALSE	2
2022-09-14	11:49:28	-0.0972389	-0.432538	-0.17589	255.227	FALSE	2
2022-09-14	11:49:28	0.283524	1.26117	-0.17589	249.654	FALSE	2
2022-09-14	11:49:29	0.336908	1.49863	0.892188	256.725	FALSE	2
2022-09-14	11:49:29	0.207443	0.922748	0.892188	250.577	FALSE	2
2022-09-14	11:49:29	0.130802	0.581833	0.892188	257.307	FALSE	2
2022-09-14	11:49:29	0.127138	0.565535	0.892188	251.142	FALSE	2
2022-09-14	11:49:30	0.162659	0.72354	0.247934	258.031	FALSE	2
2022-09-14	11:49:30	-0.0164756	-0.0732868	0.247934	251.142	FALSE	2
2022-09-14	11:49:30	0.0210308	0.0935492	0.247934	258.124	FALSE	2
2022-09-14	11:49:31	0.0530918	0.236163	-0.0992065	251.379	FALSE	2
2022-09-14	11:49:31	0.0589952	0.262422	-0.0992065	258.386	FALSE	2
2022-09-14	11:49:31	-0.153626	-0.683359	-0.0992065	251.379	FALSE	2
2022-09-14	11:49:31	-0.0476715	-0.212052	-0.0992065	258.386	FALSE	2
2022-09-14	11:49:32	-0.0451778	-0.20096	0.395699	251.379	FALSE	2
2022-09-14	11:49:32	0.0927865	0.412733	0.395699	258.799	FALSE	2
2022-09-14	11:49:32	0.179708	0.799377	0.395699	252.178	FALSE	2
2022-09-14	11:49:32	0.128512	0.571647	0.395699	259.371	FALSE	2
2022-09-14	11:49:33	0.239351	1.06468	0.508431	253.243	FALSE	2
2022-09-14	11:49:33	-0.0854832	-0.380246	0.508431	259.371	FALSE	2
2022-09-14	11:49:33	0.163881	0.728975	0.508431	253.972	FALSE	2
2022-09-14	11:49:33	0.139453	0.620315	0.508431	259.991	FALSE	2
2022-09-14	11:49:34	0.35701	1.58805	1.01918	255.56	FALSE	2
2022-09-14	11:49:34	0.00917326	0.0408045	1.01918	260.032	FALSE	2
2022-09-14	11:49:34	0.321183	1.42869	1.01918	256.988	FALSE	2
2022-09-14	11:49:35	0.32042	1.42529	1.15851	261.457	FALSE	2
2022-09-14	11:49:35	0.280674	1.24849	1.15851	258.237	FALSE	2
2022-09-14	11:49:35	0.233295	1.03774	1.15851	262.495	FALSE	2
2022-09-14	11:49:35	0.207392	0.922521	1.15851	259.159	FALSE	2
2022-09-14	11:49:36	0.299351	1.33157	1.34329	263.827	FALSE	2
2022-09-14	11:49:36	0.268003	1.19213	1.34329	260.352	FALSE	2
2022-09-14	11:49:36	0.431311	1.91856	1.34329	265.745	FALSE	2
2022-09-14	11:49:36	0.209275	0.930897	1.34329	261.282	FALSE	2
2022-09-14	11:49:37	0.392023	1.7438	1.6056	267.489	FALSE	2
2022-09-14	11:49:37	0.33813	1.50407	1.6056	262.787	FALSE	2
2022-09-14	11:49:37	0.340725	1.51561	1.6056	269.005	FALSE	2
2022-09-14	11:49:37	0.372939	1.65891	1.6056	264.445	FALSE	2
2022-09-14	11:49:38	0.264338	1.17583	1.43404	270.18	FALSE	2
2022-09-14	11:49:38	0.403779	1.79609	1.43404	266.242	FALSE	2
2022-09-14	11:49:38	0.299046	1.33022	1.43404	271.511	FALSE	2
2022-09-14	11:49:39	0.461794	2.05415	1.60967	268.296	FALSE	2
2022-09-14	11:49:39	0.303066	1.3481	1.60967	272.859	FALSE	2
2022-09-14	11:49:39	0.372227	1.65574	1.60967	269.951	FALSE	2
2022-09-14	11:49:39	0.310395	1.3807	1.60967	274.239	FALSE	2
2022-09-14	11:49:40	0.340776	1.51584	1.64159	271.467	FALSE	2
2022-09-14	11:49:40	0.383524	1.70599	1.64159	275.945	FALSE	2
2022-09-14	11:49:40	0.278384	1.23831	1.64159	272.706	FALSE	2
2022-09-14	11:49:40	0.473499	2.10622	1.64159	278.052	FALSE	2
2022-09-14	11:49:41	0.339758	1.51131	1.61335	274.217	FALSE	2
2022-09-14	11:49:41	0.422506	1.87939	1.61335	279.931	FALSE	2
2022-09-14	11:49:41	0.339606	1.51064	1.61335	275.727	FALSE	2
2022-09-14	11:49:41	0.348919	1.55206	1.61335	281.483	FALSE	2
2022-09-14	11:49:42	0.425764	1.89388	1.81586	277.621	FALSE	2
2022-09-14	11:49:42	0.331565	1.47487	1.81586	282.958	FALSE	2
2022-09-14	11:49:42	0.467341	2.07883	1.81586	279.7	FALSE	2
2022-09-14	11:49:43	0.350496	1.55908	1.56836	284.517	FALSE	2
2022-09-14	11:49:43	0.373244	1.66026	1.56836	281.36	FALSE	2
2022-09-14	11:49:43	0.349275	1.55365	1.56836	286.071	FALSE	2
2022-09-14	11:49:43	0.337316	1.50045	1.56836	282.861	FALSE	2
2022-09-14	11:49:44	0.512735	2.28075	1.76649	288.351	FALSE	2
2022-09-14	11:49:44	0.323575	1.43933	1.76649	284.3	FALSE	2
2022-09-14	11:49:44	0.386323	1.71844	1.76649	290.07	FALSE	2
2022-09-14	11:49:44	0.365865	1.62744	1.76649	285.928	FALSE	2
2022-09-14	11:49:45	0.323677	1.43978	1.70594	291.51	FALSE	2
2022-09-14	11:49:45	0.454008	2.01952	1.70594	287.947	FALSE	2
2022-09-14	11:49:45	0.316858	1.40945	1.70594	292.919	FALSE	2
2022-09-14	11:49:45	0.439504	1.955	1.70594	289.902	FALSE	2
2022-09-14	11:49:46	0.382099	1.69965	1.79224	294.619	FALSE	2
2022-09-14	11:49:46	0.41869	1.86242	1.79224	291.765	FALSE	2
2022-09-14	11:49:46	0.407952	1.81465	1.79224	296.433	FALSE	2
2022-09-14	11:49:47	0.311565	1.3859	1.73803	293.151	FALSE	2
2022-09-14	11:49:47	0.480522	2.13746	1.73803	298.571	FALSE	2
2022-09-14	11:49:47	0.358639	1.5953	1.73803	294.746	FALSE	2
2022-09-14	11:49:47	0.412176	1.83344	1.73803	300.404	FALSE	2
2022-09-14	11:49:48	0.400216	1.78024	1.54781	296.526	FALSE	2
2022-09-14	11:49:48	0.297824	1.32478	1.54781	301.729	FALSE	2
2022-09-14	11:49:48	0.38154	1.69717	1.54781	298.223	FALSE	2
2022-09-14	11:49:48	0.312277	1.38907	1.54781	303.118	FALSE	2
2022-09-14	11:49:49	0.352634	1.56859	1.71092	299.792	FALSE	2
2022-09-14	11:49:49	0.454415	2.02133	1.71092	305.139	FALSE	2
2022-09-14	11:49:49	0.346883	1.543	1.71092	301.335	FALSE	2
2022-09-14	11:49:49	0.384593	1.71075	1.71092	306.85	FALSE	2
2022-09-14	11:49:50	0.282456	1.25642	1.6494	302.591	FALSE	2
2022-09-14	11:49:50	0.309886	1.37843	1.6494	308.229	FALSE	2
2022-09-14	11:49:50	0.520064	2.31335	1.6494	304.905	FALSE	2
2022-09-14	11:49:51	0.37986	1.68969	1.39552	309.918	FALSE	2
2022-09-14	11:49:51	0.2907	1.29309	1.39552	306.198	FALSE	2
2022-09-14	11:49:51	0.37411	1.66412	1.39552	311.582	FALSE	2
2022-09-14	11:49:51	0.210242	0.935198	1.39552	307.133	FALSE	2
2022-09-14	11:49:52	0.308206	1.37096	1.43514	312.953	FALSE	2
2022-09-14	11:49:52	0.312023	1.38794	1.43514	308.521	FALSE	2
2022-09-14	11:49:52	0.23528	1.04657	1.43514	314	FALSE	2
2022-09-14	11:49:52	0.435026	1.93508	1.43514	310.456	FALSE	2
2022-09-14	11:49:53	0.312227	1.38885	1.48234	315.389	FALSE	2
2022-09-14	11:49:53	0.279504	1.24329	1.48234	311.699	FALSE	2
2022-09-14	11:49:53	0.445458	1.98149	1.48234	317.37	FALSE	2
2022-09-14	11:49:53	0.295789	1.31573	1.48234	313.015	FALSE	2
2022-09-14	11:49:54	0.32673	1.45336	1.24789	318.824	FALSE	2
2022-09-14	11:49:54	0.274669	1.22178	1.24789	314.237	FALSE	2
2022-09-14	11:49:54	0.240216	1.06853	1.24789	319.892	FALSE	2
2022-09-14	11:49:55	0.429529	1.91063	1.55076	316.147	FALSE	2
2022-09-14	11:49:55	0.295992	1.31663	1.55076	321.209	FALSE	2
2022-09-14	11:49:55	0.245509	1.09207	1.55076	317.239	FALSE	2
2022-09-14	11:49:55	0.423473	1.88369	1.55076	323.093	FALSE	2
2022-09-14	11:49:56	0.325865	1.44951	1.67758	318.689	FALSE	2
2022-09-14	11:49:56	0.378537	1.68381	1.67758	324.776	FALSE	2
2022-09-14	11:49:56	0.357977	1.59235	1.67758	320.281	FALSE	2
2022-09-14	11:49:56	0.446171	1.98466	1.67758	326.761	FALSE	2
2022-09-14	11:49:57	0.903219	4.0177	3.55969	324.299	FALSE	2
2022-09-14	11:49:57	0.945967	4.20785	3.55969	330.969	FALSE	2
2022-09-14	11:49:57	0.835789	3.71776	3.55969	328.017	FALSE	2
2022-09-14	11:49:57	0.516043	2.29546	3.55969	333.264	FALSE	2
2022-09-14	11:49:58	0.454415	2.02133	1.97319	330.038	FALSE	2
2022-09-14	11:49:58	0.417926	1.85902	1.97319	335.123	FALSE	2
2022-09-14	11:49:58	0.458435	2.03921	1.97319	332.077	FALSE	2
2022-09-14	11:49:59	0.432379	1.92331	1.92665	337.047	FALSE	2
2022-09-14	11:49:59	0.416247	1.85155	1.92665	333.929	FALSE	2
2022-09-14	11:49:59	0.424033	1.88618	1.92665	338.933	FALSE	2
2022-09-14	11:49:59	0.45986	2.04555	1.92665	335.974	FALSE	2
2022-09-14	11:50:00	0.37187	1.65415	1.72727	340.587	FALSE	2
2022-09-14	11:50:00	0.401743	1.78703	1.72727	337.761	FALSE	2
2022-09-14	11:50:00	0.378741	1.68472	1.72727	342.272	FALSE	2
2022-09-14	11:50:00	0.400878	1.78319	1.72727	339.545	FALSE	2
2022-09-14	11:50:01	0.409428	1.82122	1.79581	344.093	FALSE	2
2022-09-14	11:50:01	0.369529	1.64374	1.79581	341.188	FALSE	2
2022-09-14	11:50:01	0.38042	1.69218	1.79581	345.785	FALSE	2
2022-09-14	11:50:01	0.455483	2.02608	1.79581	343.214	FALSE	2
2022-09-14	11:50:02	0.359249	1.59801	1.60594	347.383	FALSE	2
2022-09-14	11:50:02	0.376349	1.67408	1.60594	344.888	FALSE	2
2022-09-14	11:50:02	0.347494	1.54572	1.60594	348.929	FALSE	2
2022-09-14	11:50:03	0.361489	1.60798	1.73825	346.496	FALSE	2
2022-09-14	11:50:03	0.412532	1.83502	1.73825	350.764	FALSE	2
2022-09-14	11:50:03	0.376043	1.67271	1.73825	348.169	FALSE	2
2022-09-14	11:50:03	0.413041	1.83729	1.73825	352.601	FALSE	2
2022-09-14	11:50:04	0.441896	1.96564	2.13095	350.135	FALSE	2
2022-09-14	11:50:04	0.570038	2.53564	2.13095	355.137	FALSE	2
2022-09-14	11:50:04	0.436349	1.94097	2.13095	352.076	FALSE	2
2022-09-14	11:50:04	0.467952	2.08154	2.13095	357.218	FALSE	2
2022-09-14	11:50:05	0.506629	2.25359	2.21556	354.329	FALSE	2
2022-09-14	11:50:05	0.415076	1.84634	2.21556	359.065	FALSE	2
2022-09-14	11:50:05	0.512125	2.27803	2.21556	356.607	FALSE	2
2022-09-14	11:50:05	0.558486	2.48426	2.21556	361.549	FALSE	2
2022-09-14	11:50:06	0.595178	2.64747	2.6652	359.255	FALSE	2
2022-09-14	11:50:06	0.602659	2.68075	2.6652	364.23	FALSE	2
2022-09-14	11:50:06	0.599657	2.66739	2.6652	361.922	FALSE	2
2022-09-14	11:50:07	0.679148	3.02099	2.93083	367.251	FALSE	2
2022-09-14	11:50:07	0.670496	2.9825	2.93083	364.905	FALSE	2
2022-09-14	11:50:07	0.6536	2.90734	2.93083	370.158	FALSE	2
2022-09-14	11:50:07	0.632277	2.81249	2.93083	367.717	FALSE	2
2022-09-14	11:50:08	0.652277	2.90146	3.48879	373.059	FALSE	2
2022-09-14	11:50:08	0.697163	3.10112	3.48879	370.818	FALSE	2
2022-09-14	11:50:08	0.708206	3.15024	3.48879	376.21	FALSE	2
2022-09-14	11:50:08	1.07961	4.80232	3.48879	375.621	FALSE	2
2022-09-14	11:50:09	0.358842	1.5962	1.84629	377.806	FALSE	2
2022-09-14	11:50:09	0.436145	1.94006	1.84629	377.561	FALSE	2
2022-09-14	11:50:09	0.414873	1.84544	1.84629	379.651	FALSE	2
2022-09-14	11:50:09	0.450395	2.00345	1.84629	379.564	FALSE	2
2022-09-14	11:50:10	0.448613	1.99552	1.9295	381.647	FALSE	2
2022-09-14	11:50:10	0.425611	1.8932	1.9295	381.457	FALSE	2
2022-09-14	11:50:10	0.427087	1.89977	1.9295	383.547	FALSE	2
2022-09-14	11:50:11	0.381489	1.69694	1.7528	383.154	FALSE	2
2022-09-14	11:50:11	0.381998	1.6992	1.7528	385.246	FALSE	2
2022-09-14	11:50:11	0.396959	1.76575	1.7528	384.92	FALSE	2
2022-09-14	11:50:11	0.415738	1.84929	1.7528	387.095	FALSE	2
2022-09-14	11:50:12	0.408868	1.81873	2.07158	386.739	FALSE	2
2022-09-14	11:50:12	0.405356	1.8031	2.07158	388.898	FALSE	2
2022-09-14	11:50:12	0.478486	2.1284	2.07158	388.867	FALSE	2
2022-09-14	11:50:12	0.57014	2.5361	2.07158	391.434	FALSE	2
2022-09-14	11:50:13	0.663371	2.95081	3.10718	391.818	FALSE	2
2022-09-14	11:50:13	0.535178	2.38058	3.10718	393.815	FALSE	2
2022-09-14	11:50:13	0.581438	2.58635	3.10718	394.404	FALSE	2
2022-09-14	11:50:13	1.01411	4.51096	3.10718	398.326	FALSE	2
2022-09-14	11:50:14	0.46897	2.08607	2.34451	396.49	FALSE	2
2022-09-14	11:50:14	0.610903	2.71742	2.34451	401.043	FALSE	2
2022-09-14	11:50:14	0.501336	2.23004	2.34451	398.721	FALSE	2
2022-09-14	11:50:15	0.449529	1.99959	1.99982	403.043	FALSE	2
2022-09-14	11:50:15	0.428512	1.90611	1.99982	400.627	FALSE	2
2022-09-14	11:50:15	0.480064	2.13542	1.99982	405.178	FALSE	2
2022-09-14	11:50:15	0.440216	1.95817	1.99982	402.585	FALSE	2
2022-09-14	11:50:16	0.452023	2.01069	2.56632	407.189	FALSE	2
2022-09-14	11:50:16	0.504695	2.24498	2.56632	404.83	FALSE	2
2022-09-14	11:50:16	0.566171	2.51844	2.56632	409.707	FALSE	2
2022-09-14	11:50:16	0.784847	3.49116	2.56632	408.321	FALSE	2
2022-09-14	11:50:17	1.47854	6.57684	7.96953	416.284	FALSE	2
2022-09-14	11:50:17	1.76617	7.85628	7.96953	416.177	FALSE	2
2022-09-14	11:50:17	2.31223	10.2853	7.96953	426.57	FALSE	2
2022-09-14	11:50:17	1.60958	7.15973	7.96953	423.337	FALSE	2
2022-09-14	11:50:18	1.17029	5.20568	1.77685	431.775	FALSE	2
2022-09-14	11:50:18	1.28678	5.72385	1.77685	429.061	FALSE	2
2022-09-14	11:50:18	-1.25871	-5.59899	1.77685	431.775	FALSE	2
2022-09-14	11:50:19	0.689631	3.06762	4.27921	432.128	FALSE	2
2022-09-14	11:50:19	0.775534	3.44973	4.27921	435.225	FALSE	2
2022-09-14	11:50:19	1.06912	4.75566	4.27921	436.884	FALSE	2
2022-09-14	11:50:19	1.31375	5.84382	4.27921	441.069	FALSE	2
2022-09-14	11:50:20	1.41961	6.31471	2.83276	443.199	FALSE	2
2022-09-14	11:50:20	1.32098	5.87598	2.83276	446.945	FALSE	2
2022-09-14	11:50:20	1.05085	4.67439	2.83276	447.873	FALSE	2
2022-09-14	11:50:20	-1.24411	-5.53405	2.83276	446.945	FALSE	2
2022-09-14	11:50:21	0.83874	3.73088	3.53887	451.604	FALSE	2
2022-09-14	11:50:21	0.772125	3.43457	3.53887	450.379	FALSE	2
2022-09-14	11:50:21	0.739962	3.2915	3.53887	454.896	FALSE	2
2022-09-14	11:50:21	0.831463	3.69851	3.53887	454.078	FALSE	2
2022-09-14	11:50:22	0.834415	3.71164	3.33232	458.607	FALSE	2
2022-09-14	11:50:22	0.749987	3.33609	3.33232	457.414	FALSE	2
2022-09-14	11:50:22	0.663015	2.94922	3.33232	461.556	FALSE	2
2022-09-14	11:50:23	1.05625	4.69841	4.43049	462.112	FALSE	2
2022-09-14	11:50:23	1.24108	5.52057	4.43049	467.077	FALSE	2
2022-09-14	11:50:23	0.922405	4.10304	4.43049	466.215	FALSE	2
2022-09-14	11:50:23	0.764338	3.39993	4.43049	470.477	FALSE	2
2022-09-14	11:50:24	0.921234	4.09783	4.52794	470.313	FALSE	2
2022-09-14	11:50:24	0.92673	4.12228	4.52794	474.599	FALSE	2
2022-09-14	11:50:24	1.11095	4.94173	4.52794	475.255	FALSE	2
2022-09-14	11:50:24	1.11279	4.94991	4.52794	479.549	FALSE	2
2022-09-14	11:50:25	1.5649	6.96099	10.6052	482.216	FALSE	2
2022-09-14	11:50:25	2.80439	12.4745	10.6052	492.024	FALSE	2
2022-09-14	11:50:25	2.3996	10.6739	10.6052	492.89	FALSE	2
2022-09-14	11:50:25	2.7677	12.3113	10.6052	504.335	FALSE	2
2022-09-14	11:50:26	0.910038	4.04803	2.31493	496.938	FALSE	2
2022-09-14	11:50:26	0.210853	0.937916	2.31493	505.273	FALSE	2
2022-09-14	11:50:26	0.440369	1.95885	2.31493	498.897	FALSE	2
2022-09-14	11:50:27	0.363473	1.6168	1.45891	506.89	FALSE	2
2022-09-14	11:50:27	0.448053	1.99303	1.45891	500.89	FALSE	2
2022-09-14	11:50:27	0.136603	0.607637	1.45891	507.497	FALSE	2
2022-09-14	11:50:27	0.363779	1.61816	1.45891	502.508	FALSE	2
2022-09-14	11:50:28	0.348664	1.55093	1.32184	509.048	FALSE	2
2022-09-14	11:50:28	0.297112	1.32161	1.32184	503.83	FALSE	2
2022-09-14	11:50:28	0.104084	0.462986	1.32184	509.511	FALSE	2
2022-09-14	11:50:28	0.438791	1.95183	1.32184	505.781	FALSE	2
2022-09-14	11:50:29	0.466629	2.07566	2.16972	511.587	FALSE	2
2022-09-14	11:50:29	0.602608	2.68052	2.16972	508.462	FALSE	2
2022-09-14	11:50:29	0.455738	2.02721	2.16972	513.614	FALSE	2
2022-09-14	11:50:29	0.42612	1.89547	2.16972	510.357	FALSE	2
2022-09-14	11:50:30	0.382252	1.70033	1.6368	515.314	FALSE	2
2022-09-14	11:50:30	0.351158	1.56202	1.6368	511.919	FALSE	2
2022-09-14	11:50:30	0.370496	1.64804	1.6368	516.962	FALSE	2
2022-09-14	11:50:31	0.30215	1.34402	1.62416	513.263	FALSE	2
2022-09-14	11:50:31	0.500471	2.2262	1.62416	519.189	FALSE	2
2022-09-14	11:50:31	0.260573	1.15908	1.62416	514.422	FALSE	2
2022-09-14	11:50:31	0.397316	1.76734	1.62416	520.956	FALSE	2
2022-09-14	11:50:32	0.245	1.08981	1.7962	515.512	FALSE	2
2022-09-14	11:50:32	0.410344	1.82529	1.7962	522.781	FALSE	2
2022-09-14	11:50:32	0.451056	2.00639	1.7962	517.519	FALSE	2
2022-09-14	11:50:32	0.508817	2.26332	1.7962	525.045	FALSE	2
2022-09-14	11:50:33	0.340064	1.51267	1.50147	519.031	FALSE	2
2022-09-14	11:50:33	0.402812	1.79179	1.50147	526.836	FALSE	2
2022-09-14	11:50:33	0.288155	1.28177	1.50147	520.313	FALSE	2
2022-09-14	11:50:33	0.319148	1.41963	1.50147	528.256	FALSE	2
2022-09-14	11:50:34	0.311107	1.38387	1.1338	521.697	FALSE	2
2022-09-14	11:50:34	0.17869	0.794849	1.1338	529.051	FALSE	2
2022-09-14	11:50:34	0.274873	1.22269	1.1338	522.92	FALSE	2
2022-09-14	11:50:35	-0.00955446	-0.0425001	0.0506517	529.051	FALSE	2
2022-09-14	11:50:35	-0.0211066	-0.0938864	0.0506517	522.92	FALSE	2
2022-09-14	11:50:35	-0.00619567	-0.0275596	0.0506517	529.051	FALSE	2
2022-09-14	11:50:35	0.0824048	0.366553	0.0506517	523.286	FALSE	2
2022-09-14	11:50:36	0.280471	1.24759	1.77679	530.298	FALSE	2
2022-09-14	11:50:36	0.526832	2.34345	1.77679	525.63	FALSE	2
2022-09-14	11:50:36	0.496909	2.21035	1.77679	532.509	FALSE	2
2022-09-14	11:50:36	0.29355	1.30577	1.77679	526.935	FALSE	2
2022-09-14	11:50:37	0.206272	0.917539	-0.059761	533.426	FALSE	2
2022-09-14	11:50:37	0.0113616	0.0505387	-0.059761	526.986	FALSE	2
2022-09-14	11:50:37	-0.0901651	-0.401072	-0.059761	533.426	FALSE	2
2022-09-14	11:50:37	-0.181208	-0.806049	-0.059761	526.986	FALSE	2
2022-09-14	11:50:38	-0.430063	-1.91301	-1.74323	533.426	FALSE	2
2022-09-14	11:50:38	-0.375356	-1.66966	-1.74323	526.986	FALSE	2
2022-09-14	11:50:38	-0.370267	-1.64702	-1.74323	533.426	FALSE	2
2022-09-14	11:50:39	-0.391895	-1.74323	-1.43474	526.986	FALSE	2
2022-09-14	11:50:39	-0.36701	-1.63253	-1.43474	533.426	FALSE	2
2022-09-14	11:50:39	-0.320852	-1.42721	-1.43474	526.986	FALSE	2
2022-09-14	11:50:39	-0.21042	-0.93599	-1.43474	533.426	FALSE	2
2022-09-14	11:50:40	-0.210725	-0.937347	-0.85274	526.986	FALSE	2
2022-09-14	11:50:40	-0.132964	-0.59145	-0.85274	533.426	FALSE	2
2022-09-14	11:50:40	-0.162989	-0.725008	-0.85274	526.986	FALSE	2
2022-09-14	11:50:40	-0.26014	-1.15715	-0.85274	533.426	FALSE	2
2022-09-14	11:50:41	-0.252455	-1.12297	-0.972151	526.986	FALSE	2
2022-09-14	11:50:41	-0.236577	-1.05234	-0.972151	533.426	FALSE	2
2022-09-14	11:50:41	-0.186043	-0.827556	-0.972151	526.986	FALSE	2
2022-09-14	11:50:41	-0.199122	-0.885734	-0.972151	533.426	FALSE	2
2022-09-14	11:50:42	-0.23617	-1.05053	-0.528368	526.986	FALSE	2
2022-09-14	11:50:42	-0.235712	-1.04849	-0.528368	533.426	FALSE	2
2022-09-14	11:50:42	0.115535	0.513923	-0.528368	527.5	FALSE	2
2022-09-14	11:50:43	0.128054	0.56961	0.993601	533.996	FALSE	2
2022-09-14	11:50:43	0.391819	1.74289	0.993601	529.243	FALSE	2
2022-09-14	11:50:43	0.217875	0.969152	0.993601	534.965	FALSE	2
2022-09-14	11:50:43	0.155738	0.692754	0.993601	529.936	FALSE	2
2022-09-14	11:50:44	0.375534	1.67045	1.36128	536.636	FALSE	2
2022-09-14	11:50:44	0.229478	1.02076	1.36128	530.956	FALSE	2
2022-09-14	11:50:44	0.431565	1.91969	1.36128	538.555	FALSE	2
2022-09-14	11:50:44	0.187545	0.834238	1.36128	531.791	FALSE	2
2022-09-14	11:50:45	0.285255	1.26887	1.41782	539.824	FALSE	2
2022-09-14	11:50:45	0.335433	1.49207	1.41782	533.283	FALSE	2
2022-09-14	11:50:45	0.253804	1.12897	1.41782	540.953	FALSE	2
2022-09-14	11:50:45	0.400471	1.78138	1.41782	535.064	FALSE	2
2022-09-14	11:50:46	0.189377	0.842387	1.18345	541.795	FALSE	2
2022-09-14	11:50:46	0.269224	1.19756	1.18345	536.262	FALSE	2
2022-09-14	11:50:46	0.339555	1.51041	1.18345	543.306	FALSE	2
2022-09-14	11:50:47	0.22897	1.0185	0.8425	537.28	FALSE	2
2022-09-14	11:50:47	0.273143	1.21499	0.8425	544.521	FALSE	2
2022-09-14	11:50:47	0.155687	0.692527	0.8425	537.973	FALSE	2
2022-09-14	11:50:47	0.0998094	0.443972	0.8425	544.965	FALSE	2
2022-09-14	11:50:48	0.278435	1.23853	0.708204	539.211	FALSE	2
2022-09-14	11:50:48	0.202354	0.900111	0.708204	545.865	FALSE	2
2022-09-14	11:50:48	0.142812	0.635256	0.708204	539.846	FALSE	2
2022-09-14	11:50:48	0.0132445	0.0589142	0.708204	545.924	FALSE	2
2022-09-14	11:50:49	-0.00700993	-0.0311816	0.327731	539.846	FALSE	2
2022-09-14	11:50:49	0.116909	0.520035	0.327731	546.444	FALSE	2
2022-09-14	11:50:49	0.103372	0.459819	0.327731	540.306	FALSE	2
2022-09-14	11:50:49	0.0814379	0.362252	0.327731	546.806	FALSE	2
2022-09-14	11:50:50	0.204746	0.910751	0.797942	541.217	FALSE	2
2022-09-14	11:50:50	0.180573	0.803225	0.797942	547.609	FALSE	2
2022-09-14	11:50:50	0.152837	0.67985	0.797942	541.897	FALSE	2
2022-09-14	11:50:51	0.232837	1.03571	0.923256	548.645	FALSE	2
2022-09-14	11:50:51	0.175687	0.781491	0.923256	542.678	FALSE	2
2022-09-14	11:50:51	0.31131	1.38477	0.923256	550.03	FALSE	2
2022-09-14	11:50:51	0.110395	0.491059	0.923256	543.169	FALSE	2
2022-09-14	11:50:52	0.277723	1.23537	1.26463	551.265	FALSE	2
2022-09-14	11:50:52	0.228104	1.01465	1.26463	544.184	FALSE	2
2022-09-14	11:50:52	0.266578	1.18579	1.26463	552.451	FALSE	2
2022-09-14	11:50:52	0.364797	1.62269	1.26463	545.807	FALSE	2
2022-09-14	11:50:53	0.146934	0.653592	0.919974	553.105	FALSE	2
2022-09-14	11:50:53	0.267596	1.19032	0.919974	546.997	FALSE	2
2022-09-14	11:50:53	0.199351	0.886753	0.919974	553.991	FALSE	2
2022-09-14	11:50:53	0.213397	0.949233	0.919974	547.946	FALSE	2
2022-09-14	11:50:54	0.329377	1.46513	0.918372	555.456	FALSE	2
2022-09-14	11:50:54	0.0768577	0.341878	0.918372	548.288	FALSE	2
2022-09-14	11:50:54	0.213143	0.948103	0.918372	556.405	FALSE	2
2022-09-14	11:50:55	0.295789	1.31573	1.95715	549.604	FALSE	2
2022-09-14	11:50:55	0.364135	1.61975	1.95715	558.024	FALSE	2
2022-09-14	11:50:55	0.761997	3.38952	1.95715	552.993	FALSE	2
2022-09-14	11:50:55	0.338028	1.50362	1.95715	559.528	FALSE	2
2022-09-14	11:50:56	0.252583	1.12354	1.35698	554.117	FALSE	2
2022-09-14	11:50:56	0.286018	1.27227	1.35698	560.8	FALSE	2
2022-09-14	11:50:56	0.308969	1.37436	1.35698	555.491	FALSE	2
2022-09-14	11:50:56	0.372685	1.65778	1.35698	562.458	FALSE	2
2022-09-14	11:50:57	0.220674	0.981602	1.20413	556.473	FALSE	2
2022-09-14	11:50:57	0.298232	1.3266	1.20413	563.785	FALSE	2
2022-09-14	11:50:57	0.284491	1.26547	1.20413	557.738	FALSE	2
2022-09-14	11:50:57	0.279402	1.24284	1.20413	565.027	FALSE	2
2022-09-14	11:50:58	0.311514	1.38568	1.42657	559.124	FALSE	2
2022-09-14	11:50:58	0.337163	1.49977	1.42657	566.527	FALSE	2
2022-09-14	11:50:58	0.313448	1.39428	1.42657	560.518	FALSE	2
2022-09-14	11:50:59	0.288308	1.28245	2.38941	567.81	FALSE	2
2022-09-14	11:50:59	0.331005	1.47238	2.38941	561.991	FALSE	2
2022-09-14	11:50:59	0.497112	2.21125	2.38941	570.021	FALSE	2
2022-09-14	11:50:59	1.03223	4.59157	2.38941	566.582	FALSE	2
2022-09-14	11:51:00	2.2137	9.84698	10.8063	579.868	FALSE	2
2022-09-14	11:51:00	2.1767	9.6824	10.8063	576.265	FALSE	2
2022-09-14	11:51:00	2.36866	10.5363	10.8063	590.404	FALSE	2
2022-09-14	11:51:00	2.95843	13.1597	10.8063	589.424	FALSE	2
2022-09-14	11:51:01	3.53146	15.7086	14.0071	606.113	1	3
2022-09-14	11:51:01	3.86429	17.1891	14.0071	606.613	1	4
2022-09-14	11:51:01	2.59594	11.5473	14.0071	617.66	FALSE	4
2022-09-14	11:51:01	2.60403	11.5832	14.0071	618.197	FALSE	4
2022-09-14	11:51:02	2.40413	10.6941	10.4695	628.354	FALSE	4
2022-09-14	11:51:02	2.09889	9.33628	10.4695	627.533	FALSE	4
2022-09-14	11:51:02	2.55793	11.3782	10.4695	639.732	FALSE	4
2022-09-14	11:51:03	3.88062	17.2618	18.0235	644.795	1	5
2022-09-14	11:51:03	4.45284	19.8071	18.0235	659.539	1	6
2022-09-14	11:51:03	4.01904	17.8775	18.0235	662.672	1	7
2022-09-14	11:51:03	3.85497	17.1477	18.0235	676.687	1	8
2022-09-14	11:51:04	4.35116	19.3548	23.1885	682.027	1	9
2022-09-14	11:51:04	4.92398	21.9028	23.1885	698.59	1	10
2022-09-14	11:51:04	5.47227	24.3418	23.1885	706.369	1	11
2022-09-14	11:51:04	6.10464	27.1547	23.1885	725.745	1	12
2022-09-14	11:51:05	6.21355	27.6391	27.0408	734.008	1	13
2022-09-14	11:51:05	5.7792	25.707	27.0408	751.452	1	14
2022-09-14	11:51:05	6.04378	26.8839	27.0408	760.892	1	15
2022-09-14	11:51:05	6.27965	27.9331	27.0408	779.385	1	16
2022-09-14	11:51:06	4.96103	22.0677	17.2184	782.96	1	17
2022-09-14	11:51:06	3.49238	15.5348	17.2184	794.92	1	18
2022-09-14	11:51:06	3.1592	14.0528	17.2184	797.012	1	19
2022-09-14	11:51:07	2.52011	11.21	4.9551	806.129	FALSE	19
2022-09-14	11:51:07	0.716552	3.18737	4.9551	800.2	FALSE	19
2022-09-14	11:51:07	0.740267	3.29286	4.9551	809.422	FALSE	19
2022-09-14	11:51:07	0.478893	2.13021	4.9551	802.33	FALSE	19
2022-09-14	11:51:08	0.924898	4.11413	5.69421	813.536	FALSE	19
2022-09-14	11:51:08	1.16887	5.19937	5.69421	807.529	FALSE	19
2022-09-14	11:51:08	1.13156	5.03341	5.69421	818.57	FALSE	19
2022-09-14	11:51:08	1.89513	8.42992	5.69421	815.959	FALSE	19
2022-09-14	11:51:09	2.19192	9.7501	10.0599	828.32	FALSE	19
2022-09-14	11:51:09	2.35223	10.4632	10.0599	826.422	FALSE	19
2022-09-14	11:51:09	2.28088	10.1458	10.0599	838.466	FALSE	19
2022-09-14	11:51:09	2.22128	9.8807	10.0599	836.303	FALSE	19
2022-09-14	11:51:10	2.35335	10.4682	11.0294	848.934	FALSE	19
2022-09-14	11:51:10	2.52642	11.238	11.0294	847.541	FALSE	19
2022-09-14	11:51:10	2.55879	11.382	11.0294	860.316	FALSE	19
2022-09-14	11:51:11	2.72581	12.1249	6.52493	859.666	FALSE	19
2022-09-14	11:51:11	1.43365	6.37716	6.52493	866.693	FALSE	19
2022-09-14	11:51:11	0.728512	3.24057	6.52493	862.907	FALSE	19
2022-09-14	11:51:11	0.979504	4.35703	6.52493	871.05	FALSE	19
2022-09-14	11:51:12	2.46098	10.9469	13.6634	873.854	FALSE	19
2022-09-14	11:51:12	3.04093	13.5267	13.6634	884.577	1	20
2022-09-14	11:51:12	3.15126	14.0174	13.6634	887.871	1	21
2022-09-14	11:51:12	3.63355	16.1628	13.6634	900.74	1	22
2022-09-14	11:51:13	3.5565	15.82	18.1378	903.691	1	23
2022-09-14	11:51:13	4.03228	17.9364	18.1378	918.676	1	24
2022-09-14	11:51:13	3.77161	16.7769	18.1378	920.468	1	25
2022-09-14	11:51:13	4.94983	22.0178	18.1378	940.694	1	26
2022-09-14	11:51:14	6.34968	28.2446	28.8111	948.712	1	27
2022-09-14	11:51:14	6.56169	29.1877	28.8111	969.882	1	28
2022-09-14	11:51:14	6.5197	29.0009	28.8111	977.713	1	29
2022-09-14	11:51:15	6.2224	27.6785	27.0744	997.56	1	30
2022-09-14	11:51:15	5.92245	26.3442	27.0744	1004.06	1	31
2022-09-14	11:51:15	6.12413	27.2414	27.0744	1024.8	1	32
2022-09-14	11:51:15	6.07741	27.0335	27.0744	1031.09	1	33
2022-09-14	11:51:16	5.62357	25.0148	25.8483	1049.82	1	34
2022-09-14	11:51:16	5.94474	26.4434	25.8483	1057.53	1	35
2022-09-14	11:51:16	5.84413	25.9959	25.8483	1075.81	1	36
2022-09-14	11:51:16	5.83141	25.9393	25.8483	1083.47	1	37
2022-09-14	11:51:17	5.74215	25.5422	23.5839	1101.35	1	38
2022-09-14	11:51:17	5.66042	25.1787	23.5839	1108.65	1	39
2022-09-14	11:51:17	5.02184	22.3381	23.5839	1123.69	1	40
2022-09-14	11:51:17	4.78322	21.2767	23.5839	1129.93	1	41
2022-09-14	11:51:18	4.69966	20.905	18.976	1144.6	1	42
2022-09-14	11:51:18	4.26276	18.9616	18.976	1148.89	1	43
2022-09-14	11:51:18	3.83558	17.0614	18.976	1161.66	1	44
2022-09-14	11:51:19	3.73721	16.6239	14.6553	1165.51	1	45
2022-09-14	11:51:19	3.38647	15.0637	14.6553	1176.72	1	46
2022-09-14	11:51:19	3.3021	14.6884	14.6553	1180.2	1	47
2022-09-14	11:51:19	2.75284	12.2452	14.6553	1188.97	FALSE	47
2022-09-14	11:51:20	2.1767	9.6824	9.38513	1189.89	FALSE	47
2022-09-14	11:51:20	1.93701	8.61621	9.38513	1197.58	FALSE	47
2022-09-14	11:51:20	1.93131	8.59085	9.38513	1198.48	FALSE	47
2022-09-14	11:51:20	2.39447	10.6511	9.38513	1208.23	FALSE	47
2022-09-14	11:51:21	2.31065	10.2782	13.2275	1208.75	FALSE	47
2022-09-14	11:51:21	2.99161	13.3073	13.2275	1221.54	FALSE	47
2022-09-14	11:51:21	3.33981	14.8561	13.2275	1223.61	1	48
2022-09-14	11:51:21	3.25263	14.4683	13.2275	1236.01	1	49
2022-09-14	11:51:22	3.50301	15.5821	14.4191	1239.19	1	50
2022-09-14	11:51:22	3.31441	14.7432	14.4191	1250.75	1	51
2022-09-14	11:51:22	2.90724	12.932	14.4191	1252.12	FALSE	51
2022-09-14	11:51:23	3.21049	14.2809	12.002	1265.03	1	52
2022-09-14	11:51:23	3.01482	13.4105	12.002	1265.54	1	53
2022-09-14	11:51:23	2.84245	12.6438	12.002	1277.68	FALSE	53
2022-09-14	11:51:23	1.7249	7.6727	12.002	1273.21	FALSE	53
2022-09-14	11:51:24	1.72444	7.67065	7.26455	1285.35	FALSE	53
2022-09-14	11:51:24	1.84734	8.21734	7.26455	1281.43	FALSE	53
2022-09-14	11:51:24	2.09279	9.30915	7.26455	1294.66	FALSE	53
2022-09-14	11:51:24	0.868002	3.86105	7.26455	1285.29	FALSE	53
2022-09-14	11:51:25	0.737417	3.28018	3.27769	1297.94	FALSE	53
2022-09-14	11:51:25	0.72958	3.24532	3.27769	1288.53	FALSE	53
2022-09-14	11:51:25	0.742964	3.30485	3.27769	1301.24	FALSE	53
2022-09-14	11:51:25	0.737468	3.28041	3.27769	1291.81	FALSE	53
2022-09-14	11:51:26	0.736654	3.27678	3.26192	1304.52	FALSE	53
2022-09-14	11:51:26	0.734873	3.26886	3.26192	1295.08	FALSE	53
2022-09-14	11:51:26	0.72841	3.24011	3.26192	1307.76	FALSE	53
2022-09-14	11:51:27	0.736756	3.27724	3.26858	1298.36	FALSE	53
2022-09-14	11:51:27	0.73355	3.26298	3.26858	1311.02	FALSE	53
2022-09-14	11:51:27	0.731616	3.25437	3.26858	1301.61	FALSE	53
2022-09-14	11:51:27	0.737315	3.27972	3.26858	1314.3	FALSE	53
2022-09-14	11:51:28	0.738893	3.28674	3.27033	1304.9	FALSE	53
2022-09-14	11:51:28	0.733957	3.26479	3.27033	1317.57	FALSE	53
2022-09-14	11:51:28	0.729173	3.24351	3.27033	1308.14	FALSE	53
2022-09-14	11:51:28	0.738791	3.28629	3.27033	1320.85	FALSE	53
2022-09-14	11:51:29	0.730191	3.24804	3.26682	1311.39	FALSE	53
2022-09-14	11:51:29	0.733193	3.26139	3.26682	1324.12	FALSE	53
2022-09-14	11:51:29	0.733855	3.26433	3.26682	1314.66	FALSE	53
2022-09-14	11:51:29	0.74042	3.29354	3.26682	1327.41	FALSE	53
2022-09-14	11:51:30	0.731158	3.25234	3.26041	1317.91	FALSE	53
2022-09-14	11:51:30	0.732074	3.25641	3.26041	1330.67	FALSE	53
2022-09-14	11:51:30	0.735687	3.27248	3.26041	1321.18	FALSE	53
2022-09-14	11:51:31	0.72841	3.24011	3.26292	1333.91	FALSE	53
2022-09-14	11:51:31	0.73416	3.26569	3.26292	1324.45	FALSE	53
2022-09-14	11:51:31	0.735992	3.27384	3.26292	1337.18	FALSE	53
2022-09-14	11:51:31	0.735585	3.27203	3.26292	1327.72	FALSE	53
2022-09-14	11:51:32	0.732532	3.25845	3.27673	1340.44	FALSE	53
2022-09-14	11:51:32	0.738231	3.2838	3.27673	1331	FALSE	53
2022-09-14	11:51:32	0.732583	3.25868	3.27673	1343.7	FALSE	53
2022-09-14	11:51:32	0.743219	3.30599	3.27673	1334.31	FALSE	53
2022-09-14	11:51:33	0.728817	3.24192	3.2619	1346.94	FALSE	53
2022-09-14	11:51:33	0.737112	3.27882	3.2619	1337.59	FALSE	53
2022-09-14	11:51:33	0.731768	3.25505	3.2619	1350.19	FALSE	53
2022-09-14	11:51:33	0.735534	3.2718	3.2619	1340.86	FALSE	53
2022-09-14	11:51:34	0.733346	3.26207	3.2758	1353.46	FALSE	53
2022-09-14	11:51:34	0.735585	3.27203	3.2758	1344.13	FALSE	53
2022-09-14	11:51:34	0.740369	3.29331	3.2758	1356.75	FALSE	53
2022-09-14	11:51:35	0.739147	3.28787	3.26863	1347.42	FALSE	53
2022-09-14	11:51:35	0.740267	3.29286	3.26863	1360.04	FALSE	53
2022-09-14	11:51:35	0.728054	3.23853	3.26863	1350.66	FALSE	53
2022-09-14	11:51:35	0.731819	3.25528	3.26863	1363.3	FALSE	53
2022-09-14	11:51:36	0.732328	3.25754	3.25579	1353.91	FALSE	53
2022-09-14	11:51:36	0.728919	3.24238	3.25579	1366.54	FALSE	53
2022-09-14	11:51:36	0.737875	3.28222	3.25579	1357.2	FALSE	53
2022-09-14	11:51:36	0.728613	3.24102	3.25579	1369.78	FALSE	53
2022-09-14	11:51:37	0.732074	3.25641	3.26739	1360.45	FALSE	53
2022-09-14	11:51:37	0.739147	3.28787	3.26739	1373.07	FALSE	53
2022-09-14	11:51:37	0.734873	3.26886	3.26739	1363.72	FALSE	53
2022-09-14	11:51:37	0.732074	3.25641	3.26739	1376.32	FALSE	53
2022-09-14	11:51:38	0.728257	3.23943	3.26224	1366.96	FALSE	53
2022-09-14	11:51:38	0.738588	3.28539	3.26224	1379.61	FALSE	53
2022-09-14	11:51:38	0.738486	3.28493	3.26224	1370.25	FALSE	53
2022-09-14	11:51:38	0.728206	3.23921	3.26224	1382.85	FALSE	53
2022-09-14	11:51:39	0.729377	3.24441	3.25935	1373.49	FALSE	53
2022-09-14	11:51:39	0.733448	3.26252	3.25935	1386.11	FALSE	53
2022-09-14	11:51:39	0.735382	3.27113	3.25935	1376.76	FALSE	53
2022-09-14	11:51:40	0.738282	3.28403	3.28335	1389.4	FALSE	53
2022-09-14	11:51:40	0.739707	3.29036	3.28335	1380.05	FALSE	53
2022-09-14	11:51:40	0.73701	3.27837	3.28335	1392.67	FALSE	53
2022-09-14	11:51:40	0.737519	3.28063	3.28335	1383.33	FALSE	53
2022-09-14	11:51:41	0.733092	3.26094	3.26869	1395.93	FALSE	53
2022-09-14	11:51:41	0.734873	3.26886	3.26869	1386.6	FALSE	53
2022-09-14	11:51:41	0.733346	3.26207	3.26869	1399.2	FALSE	53
2022-09-14	11:51:41	0.738028	3.2829	3.26869	1389.88	FALSE	53
2022-09-14	11:51:42	0.732074	3.25641	3.27095	1402.45	FALSE	53
2022-09-14	11:51:42	0.732837	3.25981	3.27095	1393.14	FALSE	53
2022-09-14	11:51:42	0.737773	3.28176	3.27095	1405.74	FALSE	53
2022-09-14	11:51:42	0.738689	3.28584	3.27095	1396.43	FALSE	53
2022-09-14	11:51:43	0.734211	3.26592	3.27241	1409	FALSE	53
2022-09-14	11:51:43	0.735026	3.26954	3.27241	1399.7	FALSE	53
2022-09-14	11:51:43	0.737773	3.28176	3.27241	1412.28	FALSE	53
2022-09-14	11:51:44	0.726323	3.23083	3.25754	1402.93	FALSE	53
2022-09-14	11:51:44	0.735789	3.27294	3.25754	1415.56	FALSE	53
2022-09-14	11:51:44	0.726934	3.23355	3.25754	1406.16	FALSE	53
2022-09-14	11:51:44	0.740267	3.29286	3.25754	1418.85	FALSE	53
2022-09-14	11:51:45	0.735738	3.27271	2.45296	1409.44	FALSE	53
2022-09-14	11:51:45	0.736399	3.27565	2.45296	1422.12	FALSE	53
2022-09-14	11:51:45	0.725814	3.22857	2.45296	1412.67	FALSE	53
2022-09-14	11:51:45	0.00785013	0.0349189	2.45296	1422.16	FALSE	53
2022-09-14	11:51:46	-6.60355	-29.3739	-12.9866	1412.67	FALSE	53
2022-09-14	11:51:46	-5.46289	-24.3	-12.9866	1422.16	FALSE	53
2022-09-14	11:51:46	-0.356323	-1.585	-12.9866	1412.67	FALSE	53
2022-09-14	11:51:46	0.744694	3.31255	-12.9866	1425.47	FALSE	53
2022-09-14	11:51:47	0.736552	3.27633	3.26373	1415.94	FALSE	53
2022-09-14	11:51:47	0.730038	3.24736	3.26373	1428.72	FALSE	53
2022-09-14	11:51:47	0.734568	3.26751	3.26373	1419.21	FALSE	53
2022-09-14	11:51:48	0.736349	3.27543	7.30862	1431.99	FALSE	53
2022-09-14	11:51:48	0.828104	3.68357	7.30862	1422.89	FALSE	53
2022-09-14	11:51:48	2.00637	8.92474	7.30862	1440.92	FALSE	53
2022-09-14	11:51:48	3.00138	13.3507	7.30862	1436.24	1	54
2022-09-14	11:51:49	1.79167	7.96971	7.87383	1448.89	FALSE	54
2022-09-14	11:51:49	2.02897	9.02526	7.87383	1445.27	FALSE	54
2022-09-14	11:51:49	1.76332	7.8436	7.87383	1456.73	FALSE	54
2022-09-14	11:51:49	1.4965	6.65673	7.87383	1451.93	FALSE	54
2022-09-14	11:51:50	2.11747	9.41893	6.04468	1466.15	FALSE	54
2022-09-14	11:51:50	1.55462	6.91526	6.04468	1458.84	FALSE	54
2022-09-14	11:51:50	0.735992	3.27384	6.04468	1469.43	FALSE	54
2022-09-14	11:51:50	1.02754	4.5707	6.04468	1463.41	FALSE	54
2022-09-14	11:51:51	0.648359	2.88403	2.65132	1472.31	FALSE	54
2022-09-14	11:51:51	0.63243	2.81318	2.65132	1466.22	FALSE	54
2022-09-14	11:51:51	0.507341	2.25675	2.65132	1474.57	FALSE	54
2022-09-14	11:51:52	0.305865	1.36055	1.43367	1467.58	FALSE	54
2022-09-14	11:51:52	0.455076	2.02427	1.43367	1476.59	FALSE	54
2022-09-14	11:51:52	0.188054	0.836502	1.43367	1468.42	FALSE	54
2022-09-14	11:51:52	0.340216	1.51335	1.43367	1478.1	FALSE	54
2022-09-14	11:51:53	0.25528	1.13554	1.17985	1469.56	FALSE	54
2022-09-14	11:51:53	0.37131	1.65166	1.17985	1479.76	FALSE	54
2022-09-14	11:51:53	0.221489	0.985227	1.17985	1470.54	FALSE	54
2022-09-14	11:51:53	0.212888	0.946968	1.17985	1480.7	FALSE	54
2022-09-14	11:51:54	0.472837	2.10327	2.14906	1472.65	FALSE	54
2022-09-14	11:51:54	0.587086	2.61148	2.14906	1483.31	FALSE	54
2022-09-14	11:51:54	0.383779	1.70713	2.14906	1474.35	FALSE	54
2022-09-14	11:51:54	0.488817	2.17436	2.14906	1485.49	FALSE	54
2022-09-14	11:51:55	0.364593	1.62178	1.63906	1475.97	FALSE	54
2022-09-14	11:51:55	0.504186	2.24272	1.63906	1487.73	FALSE	54
2022-09-14	11:51:55	0.236654	1.05268	1.63906	1477.03	FALSE	54
2022-09-14	11:51:56	0.488003	2.17073	1.98058	1489.9	FALSE	54
2022-09-14	11:51:56	0.277265	1.23333	1.98058	1478.26	FALSE	54
2022-09-14	11:51:56	0.520216	2.31402	1.98058	1492.22	FALSE	54
2022-09-14	11:51:56	0.495534	2.20423	1.98058	1480.46	FALSE	54
2022-09-14	11:51:57	0.971616	4.32194	3.69959	1496.54	FALSE	54
2022-09-14	11:51:57	0.753041	3.34968	3.69959	1483.81	FALSE	54
2022-09-14	11:51:57	1.07126	4.76518	3.69959	1501.3	FALSE	54
2022-09-14	11:51:57	0.530903	2.36156	3.69959	1486.18	FALSE	54
2022-09-14	11:51:58	0.620573	2.76043	1.79343	1504.06	FALSE	54
2022-09-14	11:51:58	0.356043	1.58375	1.79343	1487.76	FALSE	54
2022-09-14	11:51:58	0.416909	1.85449	1.79343	1505.92	FALSE	54
2022-09-14	11:51:58	0.219199	0.975041	1.79343	1488.73	FALSE	54
2022-09-14	11:51:59	0.276196	1.22858	1.27815	1507.15	FALSE	54
2022-09-14	11:51:59	0.222761	0.990885	1.27815	1489.73	FALSE	54
2022-09-14	11:51:59	0.363066	1.61499	1.27815	1508.76	FALSE	54
2022-09-14	11:52:00	0.222252	0.988621	3.54379	1490.71	FALSE	54
2022-09-14	11:52:00	0.467595	2.07996	3.54379	1510.84	FALSE	54
2022-09-14	11:52:00	0.99645	4.43241	3.54379	1495.15	FALSE	54
2022-09-14	11:52:00	1.50042	6.67417	3.54379	1517.52	FALSE	54
2022-09-14	11:52:01	0.69299	3.08256	1.89909	1498.23	FALSE	54
2022-09-14	11:52:01	0.493295	2.19427	1.89909	1519.71	FALSE	54
2022-09-14	11:52:01	0.319606	1.42167	1.89909	1499.65	FALSE	54
2022-09-14	11:52:01	0.201845	0.897847	1.89909	1520.61	FALSE	54
2022-09-14	11:52:02	0.134822	0.599715	0.117375	1500.25	FALSE	54
2022-09-14	11:52:02	-0.026501	-0.117882	0.117375	1520.61	FALSE	54
2022-09-14	11:52:02	0.0427101	0.189983	0.117375	1500.44	FALSE	54
2022-09-14	11:52:02	-0.0454832	-0.202318	0.117375	1520.61	FALSE	54
2022-09-14	11:52:03	0.0073921	0.0328815	-0.302903	1500.47	FALSE	54
2022-09-14	11:52:03	-0.062328	-0.277247	-0.302903	1520.61	FALSE	54
2022-09-14	11:52:03	-0.149351	-0.664343	-0.302903	1500.47	FALSE	54
2022-09-14	11:52:04	-0.0434476	-0.193264	-0.174078	1520.61	FALSE	54
2022-09-14	11:52:04	-0.134236	-0.597109	-0.174078	1500.47	FALSE	54
2022-09-14	11:52:04	0.0324303	0.144256	-0.174078	1520.75	FALSE	54
2022-09-14	11:52:04	-0.0112847	-0.0501966	-0.174078	1500.47	FALSE	54
2022-09-14	11:52:05	0.0955855	0.425183	0.657101	1521.18	FALSE	54
2022-09-14	11:52:05	-0.0104705	-0.0465749	0.657101	1500.47	FALSE	54
2022-09-14	11:52:05	0.123932	0.551274	0.657101	1521.73	FALSE	54
2022-09-14	11:52:05	0.381845	1.69852	0.657101	1502.17	FALSE	54
2022-09-14	11:52:06	0.799555	3.55658	5.19511	1525.28	FALSE	54
2022-09-14	11:52:06	0.864135	3.84385	5.19511	1506.02	FALSE	54
2022-09-14	11:52:06	1.51701	6.74796	5.19511	1532.03	FALSE	54
2022-09-14	11:52:06	1.49095	6.63204	5.19511	1512.65	FALSE	54
2022-09-14	11:52:07	1.06525	4.73845	3.28372	1536.77	FALSE	54
2022-09-14	11:52:07	0.65472	2.91233	3.28372	1515.56	FALSE	54
2022-09-14	11:52:07	0.494669	2.20039	3.28372	1538.97	FALSE	54
2022-09-14	11:52:08	0.464898	2.06796	1.41635	1517.63	FALSE	54
2022-09-14	11:52:08	0.437723	1.94708	1.41635	1540.92	FALSE	54
2022-09-14	11:52:08	0.25299	1.12535	1.41635	1518.75	FALSE	54
2022-09-14	11:52:08	0.118028	0.525012	1.41635	1541.44	FALSE	54
2022-09-14	11:52:09	0.0622521	0.27691	0.161348	1519.03	FALSE	54
2022-09-14	11:52:09	0.218079	0.970059	0.161348	1542.41	FALSE	54
2022-09-14	11:52:09	-0.127213	-0.565869	0.161348	1519.03	FALSE	54
2022-09-14	11:52:09	-0.00802776	-0.0357091	0.161348	1542.41	FALSE	54
2022-09-14	11:52:10	-0.0298089	-0.132596	-0.0504232	1519.03	FALSE	54
2022-09-14	11:52:10	0.0457127	0.203339	-0.0504232	1542.62	FALSE	54
2022-09-14	11:52:10	-0.0953051	-0.423936	-0.0504232	1519.03	FALSE	54
2022-09-14	11:52:10	0.0340587	0.1515	-0.0504232	1542.77	FALSE	54
2022-09-14	11:52:11	-0.172557	-0.767568	-2.01231	1519.03	FALSE	54
2022-09-14	11:52:11	-0.534643	-2.3782	-2.01231	1542.77	FALSE	54
2022-09-14	11:52:11	-0.649961	-2.89116	-2.01231	1519.03	FALSE	54
2022-09-14	11:52:12	-0.498715	-2.21838	-0.541084	1542.77	FALSE	54
2022-09-14	11:52:12	-0.077188	-0.343348	-0.541084	1519.03	FALSE	54
2022-09-14	11:52:12	-0.0974425	-0.433444	-0.541084	1542.77	FALSE	54
2022-09-14	11:52:12	0.186781	0.830839	-0.541084	1519.86	FALSE	54
2022-09-14	11:52:13	0.22897	1.0185	0.769891	1543.79	FALSE	54
2022-09-14	11:52:13	-0.388333	-1.72738	0.769891	1519.86	FALSE	54
2022-09-14	11:52:13	0.373906	1.66321	0.769891	1545.45	FALSE	54
2022-09-14	11:52:13	0.477774	2.12523	0.769891	1521.99	FALSE	54
2022-09-14	11:52:14	0.40729	1.81171	2.05562	1547.26	FALSE	54
2022-09-14	11:52:14	0.495331	2.20333	2.05562	1524.19	FALSE	54
2022-09-14	11:52:14	0.386985	1.72139	2.05562	1548.98	FALSE	54
2022-09-14	11:52:14	0.558893	2.48607	2.05562	1526.68	FALSE	54
2022-09-14	11:52:15	0.329682	1.46649	1.80914	1550.45	FALSE	54
2022-09-14	11:52:15	0.469377	2.08788	1.80914	1528.76	FALSE	54
2022-09-14	11:52:15	0.421082	1.87306	1.80914	1552.32	FALSE	54
2022-09-14	11:52:16	0.481997	2.14402	2.75313	1530.91	FALSE	54
2022-09-14	11:52:16	0.354211	1.5756	2.75313	1553.9	FALSE	54
2022-09-14	11:52:16	1.24668	5.54548	2.75313	1536.45	FALSE	54
2022-09-14	11:52:16	0.392837	1.74742	2.75313	1555.65	FALSE	54
2022-09-14	11:52:17	0.541997	2.41091	2.12676	1538.86	FALSE	54
2022-09-14	11:52:17	0.484898	2.15692	2.12676	1557.8	FALSE	54
2022-09-14	11:52:17	0.400878	1.78319	2.12676	1540.65	FALSE	54
2022-09-14	11:52:17	0.484695	2.15602	2.12676	1559.96	FALSE	54

## Sheet: Ursula_harness_202291411471 (3)
Date	Time	Lbs	Newtons	Total force x time		total steps > 13.345	**GoPro Fitting: 1136
2022-09-14	11:47:17	0.489936	2.17933	2.17933	FALSE	0
2022-09-14	11:47:17	0.445865	1.9833	1.9833	FALSE	0
2022-09-14	11:47:17	0.393041	1.74832	3.92766	FALSE	0
2022-09-14	11:47:17	0.478639	2.12908	4.11238	FALSE	0
2022-09-14	11:47:18	0.417621	1.85766	5.78532	FALSE	0
2022-09-14	11:47:18	0.485051	2.1576	6.26998	FALSE	0
2022-09-14	11:47:18	0.457672	2.03582	7.82114	FALSE	0
2022-09-14	11:47:19	0.884796	3.93575	10.2057	FALSE	0
2022-09-14	11:47:19	0.391412	1.74108	9.56222	FALSE	0
2022-09-14	11:47:19	0.86103	3.83003	14.0358	FALSE	0
2022-09-14	11:47:19	0.460318	2.04759	11.6098	FALSE	0
2022-09-14	11:47:20	0.455789	2.02744	16.0632	FALSE	0
2022-09-14	11:47:20	0.480522	2.13746	13.7473	FALSE	0
2022-09-14	11:47:20	0.430089	1.91312	17.9763	FALSE	0
2022-09-14	11:47:20	0.445255	1.98058	15.7278	FALSE	0
2022-09-14	11:47:21	0.362405	1.61205	19.5884	FALSE	0
2022-09-14	11:47:21	0.482201	2.14493	17.8728	FALSE	0
2022-09-14	11:47:21	0.401947	1.78794	21.3763	FALSE	0
2022-09-14	11:47:21	0.435636	1.9378	19.8106	FALSE	0
2022-09-14	11:47:22	0.358791	1.59597	22.9723	FALSE	0
2022-09-14	11:47:22	0.507035	2.25539	22.066	FALSE	0
2022-09-14	11:47:22	0.399504	1.77707	24.7494	FALSE	0
2022-09-14	11:47:23	0.470751	2.09399	24.16	FALSE	0
2022-09-14	11:47:23	0.469784	2.08969	26.8391	FALSE	0
2022-09-14	11:47:23	0.450395	2.00345	26.1634	FALSE	0
2022-09-14	11:47:23	0.434669	1.93349	28.7726	FALSE	0
2022-09-14	11:47:24	0.365916	1.62767	27.7911	FALSE	0
2022-09-14	11:47:24	0.31869	1.4176	30.1902	FALSE	0
2022-09-14	11:47:24	0.285255	1.26887	29.0599	FALSE	0
2022-09-14	11:47:24	0.0638297	0.283927	30.4741	FALSE	0
2022-09-14	11:47:25	0.298079	1.32592	30.3859	FALSE	0
2022-09-14	11:47:25	0.126934	0.564628	31.0387	FALSE	0
2022-09-14	11:47:25	-0.0839565	-0.373455	30.3859	FALSE	0
2022-09-14	11:47:25	-0.306348	-1.3627	31.0387	FALSE	0
2022-09-14	11:47:26	-0.489707	-2.17831	30.3859	FALSE	0
2022-09-14	11:47:26	-0.673422	-2.99552	31.0387	FALSE	0
2022-09-14	11:47:26	-0.822989	-3.66082	30.3859	FALSE	0
2022-09-14	11:47:27	-0.891182	-3.96416	31.0387	FALSE	0
2022-09-14	11:47:27	-0.819376	-3.64475	30.3859	FALSE	0
2022-09-14	11:47:27	-0.988485	-4.39698	31.0387	FALSE	0
2022-09-14	11:47:27	-0.82762	-3.68142	30.3859	FALSE	0
2022-09-14	11:47:28	-0.798256	-3.5508	31.0387	FALSE	0
2022-09-14	11:47:28	-0.80248	-3.56959	30.3859	FALSE	0
2022-09-14	11:47:28	-0.869147	-3.86614	31.0387	FALSE	0
2022-09-14	11:47:28	-0.435254	-1.9361	30.3859	FALSE	0
2022-09-14	11:47:29	-0.0247707	-0.110185	31.0387	FALSE	0
2022-09-14	11:47:29	0.267697	1.19077	31.5766	FALSE	0
2022-09-14	11:47:29	0.355942	1.5833	32.622	FALSE	0
2022-09-14	11:47:29	0.197875	0.880188	32.4568	FALSE	0
2022-09-14	11:47:30	0.499249	2.22076	34.8428	FALSE	0
2022-09-14	11:47:30	0.428563	1.90633	34.3631	FALSE	0
2022-09-14	11:47:30	0.51584	2.29456	37.1373	FALSE	0
2022-09-14	11:47:31	-0.098562	-0.438423	34.3631	FALSE	0
2022-09-14	11:47:31	0.0459163	0.204245	37.3416	FALSE	0
2022-09-14	11:47:31	0.0234735	0.104415	34.4676	FALSE	0
2022-09-14	11:47:31	0.088359	0.393039	37.7346	FALSE	0
2022-09-14	11:47:32	0.0978756	0.43537	34.9029	FALSE	0
2022-09-14	11:47:32	0.13182	0.586362	38.321	FALSE	0
2022-09-14	11:47:32	0.267697	1.19077	36.0937	FALSE	0
2022-09-14	11:47:32	0.210649	0.937009	39.258	FALSE	0
2022-09-14	11:47:33	0.181947	0.809337	36.903	FALSE	0
2022-09-14	11:47:33	0.195992	0.871812	40.1298	FALSE	0
2022-09-14	11:47:33	0.0647967	0.288229	37.1913	FALSE	0
2022-09-14	11:47:33	0.187595	0.83446	40.9643	FALSE	0
2022-09-14	11:47:34	0.155433	0.691397	37.8827	FALSE	0
2022-09-14	11:47:34	0.182812	0.813184	41.7774	FALSE	0
2022-09-14	11:47:34	0.059962	0.266723	38.1494	FALSE	0
2022-09-14	11:47:35	0.282405	1.25619	43.0336	FALSE	0
2022-09-14	11:47:35	0.103423	0.460046	38.6094	FALSE	0
2022-09-14	11:47:35	0.268664	1.19507	44.2287	FALSE	0
2022-09-14	11:47:35	0.0755346	0.335993	38.9454	FALSE	0
2022-09-14	11:47:36	0.204288	0.908714	45.1374	FALSE	0
2022-09-14	11:47:36	0.166578	0.740972	39.6864	FALSE	0
2022-09-14	11:47:36	-0.0265519	-0.118108	45.1374	FALSE	0
2022-09-14	11:47:36	-0.276832	-1.2314	39.6864	FALSE	0
2022-09-14	11:47:37	-0.434236	-1.93157	45.1374	FALSE	0
2022-09-14	11:47:37	-0.382175	-1.69999	39.6864	FALSE	0
2022-09-14	11:47:37	-0.42304	-1.88177	45.1374	FALSE	0
2022-09-14	11:47:37	-0.32991	-1.46751	39.6864	FALSE	0
2022-09-14	11:47:38	-0.366246	-1.62914	45.1374	FALSE	0
2022-09-14	11:47:38	-0.207722	-0.923989	39.6864	FALSE	0
2022-09-14	11:47:38	-0.189809	-0.844308	45.1374	FALSE	0
2022-09-14	11:47:39	-0.128944	-0.573569	39.6864	FALSE	0
2022-09-14	11:47:39	-0.325687	-1.44872	45.1374	FALSE	0
2022-09-14	11:47:39	-0.275152	-1.22393	39.6864	FALSE	0
2022-09-14	11:47:39	-0.258613	-1.15036	45.1374	FALSE	0
2022-09-14	11:47:40	-0.274745	-1.22212	39.6864	FALSE	0
2022-09-14	11:47:40	-0.322379	-1.43401	45.1374	FALSE	0
2022-09-14	11:47:40	-0.164771	-0.732934	39.6864	FALSE	0
2022-09-14	11:47:40	-0.169351	-0.753307	45.1374	FALSE	0
2022-09-14	11:47:41	0.0958399	0.426315	40.1127	FALSE	0
2022-09-14	11:47:41	-0.14528	-0.646234	45.1374	FALSE	0
2022-09-14	11:47:41	-0.0562211	-0.250083	40.1127	FALSE	0
2022-09-14	11:47:41	-0.0625315	-0.278153	45.1374	FALSE	0
2022-09-14	11:47:42	0.0177738	0.0790614	40.1918	FALSE	0
2022-09-14	11:47:42	0.152736	0.6794	45.8168	FALSE	0
2022-09-14	11:47:42	0.130649	0.581153	40.7729	FALSE	0
2022-09-14	11:47:43	0.201692	0.897166	46.714	FALSE	0
2022-09-14	11:47:43	0.180166	0.801414	41.5743	FALSE	0
2022-09-14	11:47:43	0.399962	1.77911	48.4931	FALSE	0
2022-09-14	11:47:43	0.031158	0.138597	41.7129	FALSE	0
2022-09-14	11:47:44	0.279097	1.24148	49.7346	FALSE	0
2022-09-14	11:47:44	0.267392	1.18941	42.9024	FALSE	0
2022-09-14	11:47:44	0.504389	2.24362	51.9782	FALSE	0
2022-09-14	11:47:44	0.676348	3.00853	45.9109	FALSE	0
2022-09-14	11:47:45	0.824338	3.66682	55.645	FALSE	0
2022-09-14	11:47:45	0.582608	2.59156	48.5024	FALSE	0
2022-09-14	11:47:45	1.16454	5.18011	60.8251	FALSE	0
2022-09-14	11:47:45	1.61691	7.19234	55.6948	FALSE	0
2022-09-14	11:47:46	0.777773	3.45969	64.2848	FALSE	0
2022-09-14	11:47:46	1.42917	6.35723	62.052	FALSE	0
2022-09-14	11:47:46	1.32383	5.88866	70.1735	FALSE	0
2022-09-14	11:47:47	1.62078	7.20955	69.2616	FALSE	0
2022-09-14	11:47:47	1.48184	6.59152	76.765	FALSE	0
2022-09-14	11:47:47	0.881031	3.919	73.1806	FALSE	0
2022-09-14	11:47:47	0.442608	1.96881	78.7338	FALSE	0
2022-09-14	11:47:48	0.375484	1.67023	74.8508	FALSE	0
2022-09-14	11:47:48	0.347138	1.54414	80.2779	FALSE	0
2022-09-14	11:47:48	0.261692	1.16406	76.0149	FALSE	0
2022-09-14	11:47:48	-0.0472644	-0.210242	80.2779	FALSE	0
2022-09-14	11:47:49	0.0834226	0.37108	76.3859	FALSE	0
2022-09-14	11:47:49	0.3164	1.40741	81.6854	FALSE	0
2022-09-14	11:47:49	0.309733	1.37775	77.7637	FALSE	0
2022-09-14	11:47:49	-0.113931	-0.506788	81.6854	FALSE	0
2022-09-14	11:47:50	-0.329554	-1.46592	77.7637	FALSE	0
2022-09-14	11:47:50	-0.301259	-1.34006	81.6854	FALSE	0
2022-09-14	11:47:50	-0.236425	-1.05167	77.7637	FALSE	0
2022-09-14	11:47:51	-0.506654	-2.2537	81.6854	FALSE	0
2022-09-14	11:47:51	-0.654185	-2.90995	77.7637	FALSE	0
2022-09-14	11:47:51	-0.782378	-3.48017	81.6854	FALSE	0
2022-09-14	11:47:51	-0.720648	-3.20559	77.7637	FALSE	0
2022-09-14	11:47:52	-0.726602	-3.23207	81.6854	FALSE	0
2022-09-14	11:47:52	-0.646704	-2.87667	77.7637	FALSE	0
2022-09-14	11:47:52	-0.678409	-3.0177	81.6854	FALSE	0
2022-09-14	11:47:52	-0.538765	-2.39653	77.7637	FALSE	0
2022-09-14	11:47:53	-0.49444	-2.19937	81.6854	FALSE	0
2022-09-14	11:47:53	-0.552506	-2.45766	77.7637	FALSE	0
2022-09-14	11:47:53	-0.647315	-2.87939	81.6854	FALSE	0
2022-09-14	11:47:53	-0.665737	-2.96133	77.7637	FALSE	0
2022-09-14	11:47:54	-0.529656	-2.35602	81.6854	FALSE	0
2022-09-14	11:47:54	-0.545076	-2.42461	77.7637	FALSE	0
2022-09-14	11:47:54	-0.568231	-2.52761	81.6854	FALSE	0
2022-09-14	11:47:55	-0.551132	-2.45155	77.7637	FALSE	0
2022-09-14	11:47:55	-0.4893	-2.1765	81.6854	FALSE	0
2022-09-14	11:47:55	-0.405992	-1.80593	77.7637	FALSE	0
2022-09-14	11:47:55	-0.433168	-1.92682	81.6854	FALSE	0
2022-09-14	11:47:56	-0.303142	-1.34844	77.7637	FALSE	0
2022-09-14	11:47:56	-0.22299	-0.991904	81.6854	FALSE	0
2022-09-14	11:47:56	-0.279834	-1.24476	77.7637	FALSE	0
2022-09-14	11:47:56	-0.288028	-1.28121	81.6854	FALSE	0
2022-09-14	11:47:57	-0.323244	-1.43785	77.7637	FALSE	0
2022-09-14	11:47:57	-0.342379	-1.52297	81.6854	FALSE	0
2022-09-14	11:47:57	0.0234226	0.104188	77.8679	FALSE	0
2022-09-14	11:47:57	0.0678501	0.301811	81.9872	FALSE	0
2022-09-14	11:47:58	0.466272	2.07407	79.9419	FALSE	0
2022-09-14	11:47:58	0.567901	2.52614	84.5133	FALSE	0
2022-09-14	11:47:58	0.483779	2.15195	82.0939	FALSE	0
2022-09-14	11:47:59	0.624542	2.77809	87.2914	FALSE	0
2022-09-14	11:47:59	0.585356	2.60378	84.6977	FALSE	0
2022-09-14	11:47:59	0.387697	1.72455	89.0159	FALSE	0
2022-09-14	11:47:59	0.29757	1.32365	86.0213	FALSE	0
2022-09-14	11:48:00	0.295636	1.31505	90.331	FALSE	0
2022-09-14	11:48:00	0.279504	1.24329	87.2646	FALSE	0
2022-09-14	11:48:00	0.276501	1.22993	91.5609	FALSE	0
2022-09-14	11:48:00	0.348003	1.54799	88.8126	FALSE	0
2022-09-14	11:48:01	0.366934	1.6322	93.1931	FALSE	0
2022-09-14	11:48:01	0.355331	1.58058	90.3932	FALSE	0
2022-09-14	11:48:01	0.426221	1.89592	95.089	FALSE	0
2022-09-14	11:48:01	0.466985	2.07724	92.4704	FALSE	0
2022-09-14	11:48:02	0.464949	2.06819	97.1572	FALSE	0
2022-09-14	11:48:02	0.486018	2.16191	94.6323	FALSE	0
2022-09-14	11:48:02	0.482354	2.14561	99.3028	FALSE	0
2022-09-14	11:48:03	0.473244	2.10508	96.7374	FALSE	0
2022-09-14	11:48:03	0.476552	2.1198	101.423	FALSE	0
2022-09-14	11:48:03	0.511209	2.27396	99.0114	FALSE	0
2022-09-14	11:48:03	0.502252	2.23412	103.657	FALSE	0
2022-09-14	11:48:04	0.46271	2.05823	101.07	FALSE	0
2022-09-14	11:48:04	0.441081	1.96202	105.619	FALSE	0
2022-09-14	11:48:04	0.500725	2.22732	103.297	FALSE	0
2022-09-14	11:48:04	0.494516	2.19971	107.818	FALSE	0
2022-09-14	11:48:05	0.450191	2.00254	105.299	FALSE	0
2022-09-14	11:48:05	0.501794	2.23208	110.051	FALSE	0
2022-09-14	11:48:05	0.496247	2.20741	107.507	FALSE	0
2022-09-14	11:48:05	0.500878	2.22801	112.279	FALSE	0
2022-09-14	11:48:06	0.485611	2.16009	109.667	FALSE	0
2022-09-14	11:48:06	0.498588	2.21782	114.496	FALSE	0
2022-09-14	11:48:06	0.522404	2.32376	111.991	FALSE	0
2022-09-14	11:48:07	0.500063	2.22438	116.721	FALSE	0
2022-09-14	11:48:07	0.496756	2.20967	114.2	FALSE	0
2022-09-14	11:48:07	0.529529	2.35545	119.076	FALSE	0
2022-09-14	11:48:07	0.51411	2.28686	116.487	FALSE	0
2022-09-14	11:48:08	0.477468	2.12387	121.2	FALSE	0
2022-09-14	11:48:08	0.408257	1.81601	118.303	FALSE	0
2022-09-14	11:48:08	0.386629	1.7198	122.92	FALSE	0
2022-09-14	11:48:08	0.145509	0.647253	118.951	FALSE	0
2022-09-14	11:48:09	0.0255601	0.113696	123.034	FALSE	0
2022-09-14	11:48:09	0.659453	2.93338	121.884	FALSE	0
2022-09-14	11:48:09	0.446323	1.98533	125.019	FALSE	0
2022-09-14	11:48:09	-0.493625	-2.19574	121.884	FALSE	0
2022-09-14	11:48:10	-0.336781	-1.49807	125.019	FALSE	0
2022-09-14	11:48:10	-0.401666	-1.78669	121.884	FALSE	0
2022-09-14	11:48:10	-0.342531	-1.52365	125.019	FALSE	0
2022-09-14	11:48:11	-0.455966	-2.02823	121.884	FALSE	0
2022-09-14	11:48:11	-0.502073	-2.23332	125.019	FALSE	0
2022-09-14	11:48:11	-0.466043	-2.07305	121.884	FALSE	0
2022-09-14	11:48:11	-0.501921	-2.23264	125.019	FALSE	0
2022-09-14	11:48:12	-0.574185	-2.55409	121.884	FALSE	0
2022-09-14	11:48:12	-0.478867	-2.1301	125.019	FALSE	0
2022-09-14	11:48:12	-0.385534	-1.71493	121.884	FALSE	0
2022-09-14	11:48:12	-0.392353	-1.74526	125.019	FALSE	0
2022-09-14	11:48:13	-0.474491	-2.11063	121.884	FALSE	0
2022-09-14	11:48:13	-0.155101	-0.68992	125.019	FALSE	0
2022-09-14	11:48:13	-0.123855	-0.550932	121.884	FALSE	0
2022-09-14	11:48:13	-0.00589033	-0.0262014	125.019	FALSE	0
2022-09-14	11:48:14	-0.090216	-0.401299	121.884	FALSE	0
2022-09-14	11:48:14	0.174415	0.775833	125.795	FALSE	0
2022-09-14	11:48:14	0.0527865	0.234805	122.119	FALSE	0
2022-09-14	11:48:15	0.227952	1.01398	126.809	FALSE	0
2022-09-14	11:48:15	0.551005	2.45098	124.57	FALSE	0
2022-09-14	11:48:15	1.21905	5.42258	132.231	FALSE	0
2022-09-14	11:48:15	0.895636	3.98397	128.554	FALSE	0
2022-09-14	11:48:16	0.620267	2.75907	134.99	FALSE	0
2022-09-14	11:48:16	0.504084	2.24227	130.796	FALSE	0
2022-09-14	11:48:16	0.392735	1.74696	136.737	FALSE	0
2022-09-14	11:48:16	0.46841	2.08358	132.88	FALSE	0
2022-09-14	11:48:17	0.259657	1.15501	137.892	FALSE	0
2022-09-14	11:48:17	0.0593005	0.26378	133.143	FALSE	0
2022-09-14	11:48:17	-0.146348	-0.650985	137.892	FALSE	0
2022-09-14	11:48:17	0.0419977	0.186814	133.33	FALSE	0
2022-09-14	11:48:18	0.226883	1.00922	138.902	FALSE	0
2022-09-14	11:48:18	0.323626	1.43955	134.77	FALSE	0
2022-09-14	11:48:18	0.115026	0.511659	139.413	FALSE	0
2022-09-14	11:48:19	0.37472	1.66683	136.436	FALSE	0
2022-09-14	11:48:19	0.314262	1.3979	140.811	FALSE	0
2022-09-14	11:48:19	0.395687	1.76009	138.197	FALSE	0
2022-09-14	11:48:19	0.183982	0.818389	141.63	FALSE	0
2022-09-14	11:48:20	0.347697	1.54663	139.743	FALSE	0
2022-09-14	11:48:20	0.265713	1.18194	142.811	FALSE	0
2022-09-14	11:48:20	0.352583	1.56836	141.312	FALSE	0
2022-09-14	11:48:20	0.0335498	0.149236	142.961	FALSE	0
2022-09-14	11:48:21	-0.185839	-0.826649	141.312	FALSE	0
2022-09-14	11:48:21	-0.266552	-1.18568	142.961	FALSE	0
2022-09-14	11:48:21	-0.285432	-1.26966	141.312	FALSE	0
2022-09-14	11:48:21	-0.389656	-1.73327	142.961	FALSE	0
2022-09-14	11:48:22	-0.130369	-0.579907	141.312	FALSE	0
2022-09-14	11:48:22	0.0794022	0.353197	143.314	FALSE	0
2022-09-14	11:48:22	0.216451	0.962817	142.274	FALSE	0
2022-09-14	11:48:23	0.146985	0.653819	143.968	FALSE	0
2022-09-14	11:48:23	0.360573	1.6039	143.878	FALSE	0
2022-09-14	11:48:23	0.384746	1.71143	145.679	FALSE	0
2022-09-14	11:48:23	0.403473	1.79473	145.673	FALSE	0
2022-09-14	11:48:24	0.494466	2.19948	147.879	FALSE	0
2022-09-14	11:48:24	0.612277	2.72353	148.397	FALSE	0
2022-09-14	11:48:24	0.468054	2.082	149.961	FALSE	0
2022-09-14	11:48:24	0.477265	2.12297	150.52	FALSE	0
2022-09-14	11:48:25	0.442863	1.96994	151.931	FALSE	0
2022-09-14	11:48:25	0.514415	2.28822	152.808	FALSE	0
2022-09-14	11:48:25	-0.178613	-0.794506	151.931	FALSE	0
2022-09-14	11:48:25	-0.2579	-1.14719	152.808	FALSE	0
2022-09-14	11:48:26	0.0550766	0.244992	152.176	FALSE	0
2022-09-14	11:48:26	0.137672	0.612393	153.42	FALSE	0
2022-09-14	11:48:26	0.242557	1.07894	153.254	FALSE	0
2022-09-14	11:48:27	0.699962	3.11357	156.534	FALSE	0
2022-09-14	11:48:27	2.15217	9.57328	162.828	FALSE	0
2022-09-14	11:48:27	3.67971	16.3681	172.902	1	1
2022-09-14	11:48:27	4.24632	18.8885	181.716	1	2
2022-09-14	11:48:28	1.21238	5.39291	178.295	FALSE	2
2022-09-14	11:48:28	1.00373	4.46479	186.181	FALSE	2
2022-09-14	11:48:28	0.611514	2.72014	181.015	FALSE	2
2022-09-14	11:48:28	0.525254	2.33643	188.517	FALSE	2
2022-09-14	11:48:29	0.638791	2.84147	183.856	FALSE	2
2022-09-14	11:48:29	0.786781	3.49976	192.017	FALSE	2
2022-09-14	11:48:29	0.653244	2.90576	186.762	FALSE	2
2022-09-14	11:48:29	0.63818	2.83875	194.856	FALSE	2
2022-09-14	11:48:30	0.691463	3.07577	189.838	FALSE	2
2022-09-14	11:48:30	0.745713	3.31708	198.173	FALSE	2
2022-09-14	11:48:30	0.740471	3.29376	193.132	FALSE	2
2022-09-14	11:48:31	0.689886	3.06875	201.242	FALSE	2
2022-09-14	11:48:31	0.752532	3.34741	196.479	FALSE	2
2022-09-14	11:48:31	0.716807	3.1885	204.43	FALSE	2
2022-09-14	11:48:31	0.821845	3.65573	200.135	FALSE	2
2022-09-14	11:48:32	0.839707	3.73518	208.166	FALSE	2
2022-09-14	11:48:32	0.621031	2.76247	202.897	FALSE	2
2022-09-14	11:48:32	0.620369	2.75953	210.925	FALSE	2
2022-09-14	11:48:32	0.636145	2.8297	205.727	FALSE	2
2022-09-14	11:48:33	0.640165	2.84758	213.773	FALSE	2
2022-09-14	11:48:33	0.646934	2.87769	208.605	FALSE	2
2022-09-14	11:48:33	0.54383	2.41906	216.192	FALSE	2
2022-09-14	11:48:33	0.521234	2.31855	210.923	FALSE	2
2022-09-14	11:48:34	0.515178	2.29161	218.483	FALSE	2
2022-09-14	11:48:34	0.52673	2.343	213.266	FALSE	2
2022-09-14	11:48:34	0.571921	2.54402	221.027	FALSE	2
2022-09-14	11:48:35	0.599199	2.66536	215.931	FALSE	2
2022-09-14	11:48:35	0.600522	2.67124	223.699	FALSE	2
2022-09-14	11:48:35	0.504237	2.24295	218.174	FALSE	2
2022-09-14	11:48:35	0.478537	2.12863	225.827	FALSE	2
2022-09-14	11:48:36	0.430496	1.91493	220.089	FALSE	2
2022-09-14	11:48:36	0.42729	1.90067	227.728	FALSE	2
2022-09-14	11:48:36	0.458028	2.0374	222.127	FALSE	2
2022-09-14	11:48:36	0.474669	2.11142	229.839	FALSE	2
2022-09-14	11:48:37	0.423524	1.88392	224.011	FALSE	2
2022-09-14	11:48:37	0.524898	2.33485	232.174	FALSE	2
2022-09-14	11:48:37	0.469733	2.08947	226.1	FALSE	2
2022-09-14	11:48:37	0.552736	2.45868	234.633	FALSE	2
2022-09-14	11:48:38	0.575433	2.55964	228.66	FALSE	2
2022-09-14	11:48:38	0.551107	2.45143	237.084	FALSE	2
2022-09-14	11:48:38	0.534771	2.37877	231.039	FALSE	2
2022-09-14	11:48:39	0.455433	2.02586	239.11	FALSE	2
2022-09-14	11:48:39	0.497519	2.21306	233.252	FALSE	2
2022-09-14	11:48:39	0.453244	2.01612	241.126	FALSE	2
2022-09-14	11:48:39	0.461794	2.05415	235.306	FALSE	2
2022-09-14	11:48:40	0.467952	2.08154	243.208	FALSE	2
2022-09-14	11:48:40	0.471412	2.09693	237.403	FALSE	2
2022-09-14	11:48:40	0.435331	1.93644	245.144	FALSE	2
2022-09-14	11:48:40	0.467748	2.08064	239.483	FALSE	2
2022-09-14	11:48:41	0.502303	2.23434	247.379	FALSE	2
2022-09-14	11:48:41	0.45869	2.04034	241.524	FALSE	2
2022-09-14	11:48:41	0.437774	1.94731	249.326	FALSE	2
2022-09-14	11:48:41	0.563931	2.50848	244.032	FALSE	2
2022-09-14	11:48:42	0.491158	2.18477	251.511	FALSE	2
2022-09-14	11:48:42	0.499249	2.22076	246.253	FALSE	2
2022-09-14	11:48:42	0.363372	1.61635	253.127	FALSE	2
2022-09-14	11:48:43	-0.0848216	-0.377303	246.253	FALSE	2
2022-09-14	11:48:43	-0.354185	-1.57549	253.127	FALSE	2
2022-09-14	11:48:43	-0.50645	-2.25279	246.253	FALSE	2
2022-09-14	11:48:43	-0.546399	-2.43049	253.127	FALSE	2
2022-09-14	11:48:44	-0.743396	-3.30677	246.253	FALSE	2
2022-09-14	11:48:44	-0.651539	-2.89818	253.127	FALSE	2
2022-09-14	11:48:44	-0.712302	-3.16846	246.253	FALSE	2
2022-09-14	11:48:44	-0.588027	-2.61566	253.127	FALSE	2
2022-09-14	11:48:45	-0.642938	-2.85992	246.253	FALSE	2
2022-09-14	11:48:45	-0.601361	-2.67497	253.127	FALSE	2
2022-09-14	11:48:45	-0.630419	-2.80423	246.253	FALSE	2
2022-09-14	11:48:45	-0.524567	-2.33338	253.127	FALSE	2
2022-09-14	11:48:46	-0.556882	-2.47712	246.253	FALSE	2
2022-09-14	11:48:46	-0.535916	-2.38386	253.127	FALSE	2
2022-09-14	11:48:46	-0.605076	-2.6915	246.253	FALSE	2
2022-09-14	11:48:47	-0.51505	-2.29105	253.127	FALSE	2
2022-09-14	11:48:47	-0.507824	-2.2589	246.253	FALSE	2
2022-09-14	11:48:47	-0.621361	-2.76394	253.127	FALSE	2
2022-09-14	11:48:47	-0.599987	-2.66886	246.253	FALSE	2
2022-09-14	11:48:48	-0.588282	-2.6168	253.127	FALSE	2
2022-09-14	11:48:48	-0.453676	-2.01804	246.253	FALSE	2
2022-09-14	11:48:48	-0.561666	-2.4984	253.127	FALSE	2
2022-09-14	11:48:48	-0.610725	-2.71663	246.253	FALSE	2
2022-09-14	11:48:49	-0.676933	-3.01113	253.127	FALSE	2
2022-09-14	11:48:49	-0.657951	-2.9267	246.253	FALSE	2
2022-09-14	11:48:49	-0.549351	-2.44362	253.127	FALSE	2
2022-09-14	11:48:49	-0.612659	-2.72523	246.253	FALSE	2
2022-09-14	11:48:50	-0.604516	-2.68901	253.127	FALSE	2
2022-09-14	11:48:50	-0.686399	-3.05324	246.253	FALSE	2
2022-09-14	11:48:50	-0.636526	-2.83139	253.127	FALSE	2
2022-09-14	11:48:51	-0.513066	-2.28222	246.253	FALSE	2
2022-09-14	11:48:51	-0.527926	-2.34832	253.127	FALSE	2
2022-09-14	11:48:51	-0.575254	-2.55884	246.253	FALSE	2
2022-09-14	11:48:51	-0.553931	-2.464	253.127	FALSE	2
2022-09-14	11:48:52	-0.555152	-2.46943	246.253	FALSE	2
2022-09-14	11:48:52	-0.556017	-2.47327	253.127	FALSE	2
2022-09-14	11:48:52	-0.574084	-2.55364	246.253	FALSE	2
2022-09-14	11:48:52	-0.575559	-2.5602	253.127	FALSE	2
2022-09-14	11:48:53	-0.572659	-2.5473	246.253	FALSE	2
2022-09-14	11:48:53	-0.571285	-2.54119	253.127	FALSE	2
2022-09-14	11:48:53	-0.569452	-2.53304	246.253	FALSE	2
2022-09-14	11:48:53	-0.566348	-2.51923	253.127	FALSE	2
2022-09-14	11:48:54	-0.562786	-2.50338	246.253	FALSE	2
2022-09-14	11:48:54	-0.556221	-2.47418	253.127	FALSE	2
2022-09-14	11:48:54	-0.552455	-2.45743	246.253	FALSE	2
2022-09-14	11:48:55	-0.554236	-2.46535	253.127	FALSE	2
2022-09-14	11:48:55	-0.550318	-2.44792	246.253	FALSE	2
2022-09-14	11:48:55	-0.547162	-2.43389	253.127	FALSE	2
2022-09-14	11:48:55	-0.551437	-2.4529	246.253	FALSE	2
2022-09-14	11:48:56	-0.549045	-2.44226	253.127	FALSE	2
2022-09-14	11:48:56	-0.544872	-2.4237	246.253	FALSE	2
2022-09-14	11:48:56	-0.545941	-2.42845	253.127	FALSE	2
2022-09-14	11:48:56	-0.541208	-2.4074	246.253	FALSE	2
2022-09-14	11:48:57	-0.544262	-2.42099	253.127	FALSE	2
2022-09-14	11:48:57	-0.551081	-2.45132	246.253	FALSE	2
2022-09-14	11:48:57	-0.581819	-2.58805	253.127	FALSE	2
2022-09-14	11:48:57	-0.626603	-2.78726	246.253	FALSE	2
2022-09-14	11:48:58	-0.62533	-2.78159	253.127	FALSE	2
2022-09-14	11:48:58	-0.688485	-3.06252	246.253	FALSE	2
2022-09-14	11:48:58	-0.626043	-2.78476	253.127	FALSE	2
2022-09-14	11:48:59	-0.650979	-2.89568	246.253	FALSE	2
2022-09-14	11:48:59	-0.848587	-3.77468	253.127	FALSE	2
2022-09-14	11:48:59	-0.6465	-2.87576	246.253	FALSE	2
2022-09-14	11:48:59	-0.685635	-3.04984	253.127	FALSE	2
2022-09-14	11:49:00	-0.665788	-2.96156	246.253	FALSE	2
2022-09-14	11:49:00	-0.658104	-2.92738	253.127	FALSE	2
2022-09-14	11:49:00	-0.607926	-2.70418	246.253	FALSE	2
2022-09-14	11:49:00	-0.570623	-2.53825	253.127	FALSE	2
2022-09-14	11:49:01	-0.642226	-2.85675	246.253	FALSE	2
2022-09-14	11:49:01	-0.562379	-2.50157	253.127	FALSE	2
2022-09-14	11:49:01	-0.633066	-2.816	246.253	FALSE	2
2022-09-14	11:49:01	-0.518867	-2.30802	253.127	FALSE	2
2022-09-14	11:49:02	-0.60589	-2.69512	246.253	FALSE	2
2022-09-14	11:49:02	-0.573778	-2.55228	253.127	FALSE	2
2022-09-14	11:49:02	-0.638561	-2.84045	246.253	FALSE	2
2022-09-14	11:49:03	-0.741819	-3.29976	253.127	FALSE	2
2022-09-14	11:49:03	-0.549198	-2.44294	246.253	FALSE	2
2022-09-14	11:49:03	-0.445737	-1.98273	253.127	FALSE	2
2022-09-14	11:49:03	-0.356577	-1.58613	246.253	FALSE	2
2022-09-14	11:49:04	-0.310572	-1.38149	253.127	FALSE	2
2022-09-14	11:49:04	-0.167621	-0.745612	246.253	FALSE	2
2022-09-14	11:49:04	-0.0966791	-0.430048	253.127	FALSE	2
2022-09-14	11:49:04	0.0972648	0.432653	246.686	FALSE	2
2022-09-14	11:49:05	0.150293	0.668533	253.796	FALSE	2
2022-09-14	11:49:05	0.202303	0.899884	247.585	FALSE	2
2022-09-14	11:49:05	0.1993	0.886526	254.682	FALSE	2
2022-09-14	11:49:05	0.181539	0.807522	248.393	FALSE	2
2022-09-14	11:49:06	0.122405	0.544482	255.227	FALSE	2
2022-09-14	11:49:06	-0.00538142	-0.0239376	248.393	FALSE	2
2022-09-14	11:49:06	-0.0691473	-0.307581	255.227	FALSE	2
2022-09-14	11:49:07	-0.159122	-0.707806	248.393	FALSE	2
2022-09-14	11:49:07	-0.445025	-1.97956	255.227	FALSE	2
2022-09-14	11:49:07	-0.687417	-3.05777	248.393	FALSE	2
2022-09-14	11:49:07	-0.789503	-3.51187	255.227	FALSE	2
2022-09-14	11:49:08	-0.646602	-2.87622	248.393	FALSE	2
2022-09-14	11:49:08	-0.826399	-3.67599	255.227	FALSE	2
2022-09-14	11:49:08	-0.723243	-3.21713	248.393	FALSE	2
2022-09-14	11:49:08	-0.732251	-3.2572	255.227	FALSE	2
2022-09-14	11:49:09	-0.63963	-2.8452	248.393	FALSE	2
2022-09-14	11:49:09	-0.665432	-2.95997	255.227	FALSE	2
2022-09-14	11:49:09	-0.518358	-2.30576	248.393	FALSE	2
2022-09-14	11:49:09	-0.557035	-2.4778	255.227	FALSE	2
2022-09-14	11:49:10	-0.590623	-2.62721	248.393	FALSE	2
2022-09-14	11:49:10	-0.471437	-2.09705	255.227	FALSE	2
2022-09-14	11:49:10	-0.527213	-2.34515	248.393	FALSE	2
2022-09-14	11:49:11	-0.505941	-2.25053	255.227	FALSE	2
2022-09-14	11:49:11	-0.561412	-2.49727	248.393	FALSE	2
2022-09-14	11:49:11	-0.400852	-1.78307	255.227	FALSE	2
2022-09-14	11:49:11	-0.440496	-1.95941	248.393	FALSE	2
2022-09-14	11:49:12	-0.211946	-0.942778	255.227	FALSE	2
2022-09-14	11:49:12	-0.297544	-1.32354	248.393	FALSE	2
2022-09-14	11:49:12	-0.247926	-1.10282	255.227	FALSE	2
2022-09-14	11:49:12	-0.103193	-0.459023	248.393	FALSE	2
2022-09-14	11:49:13	-0.0872135	-0.387943	255.227	FALSE	2
2022-09-14	11:49:13	-0.120852	-0.537574	248.393	FALSE	2
2022-09-14	11:49:13	-0.178664	-0.794733	255.227	FALSE	2
2022-09-14	11:49:13	-0.045585	-0.202771	248.393	FALSE	2
2022-09-14	11:49:14	-0.0977987	-0.435028	255.227	FALSE	2
2022-09-14	11:49:14	-0.0443636	-0.197338	248.393	FALSE	2
2022-09-14	11:49:14	-0.216425	-0.962702	255.227	FALSE	2
2022-09-14	11:49:15	-0.231743	-1.03084	248.393	FALSE	2
2022-09-14	11:49:15	-0.0512847	-0.228125	255.227	FALSE	2
2022-09-14	11:49:15	-0.127773	-0.56836	248.393	FALSE	2
2022-09-14	11:49:15	-0.17673	-0.78613	255.227	FALSE	2
2022-09-14	11:49:16	-0.324872	-1.4451	248.393	FALSE	2
2022-09-14	11:49:16	-0.261717	-1.16417	255.227	FALSE	2
2022-09-14	11:49:16	-0.268893	-1.19609	248.393	FALSE	2
2022-09-14	11:49:16	-0.315	-1.40118	255.227	FALSE	2
2022-09-14	11:49:17	-0.314033	-1.39688	248.393	FALSE	2
2022-09-14	11:49:17	-0.345737	-1.53791	255.227	FALSE	2
2022-09-14	11:49:17	-0.348944	-1.55217	248.393	FALSE	2
2022-09-14	11:49:17	-0.275305	-1.22461	255.227	FALSE	2
2022-09-14	11:49:18	-0.255712	-1.13746	248.393	FALSE	2
2022-09-14	11:49:18	-0.338766	-1.5069	255.227	FALSE	2
2022-09-14	11:49:18	-0.410827	-1.82744	248.393	FALSE	2
2022-09-14	11:49:19	-0.398664	-1.77334	255.227	FALSE	2
2022-09-14	11:49:19	-0.396323	-1.76292	248.393	FALSE	2
2022-09-14	11:49:19	-0.495661	-2.2048	255.227	FALSE	2
2022-09-14	11:49:19	-0.599427	-2.66637	248.393	FALSE	2
2022-09-14	11:49:20	-0.665076	-2.95839	255.227	FALSE	2
2022-09-14	11:49:20	-0.521157	-2.31821	248.393	FALSE	2
2022-09-14	11:49:20	-0.553829	-2.46354	255.227	FALSE	2
2022-09-14	11:49:20	-0.623142	-2.77186	248.393	FALSE	2
2022-09-14	11:49:21	-0.56645	-2.51968	255.227	FALSE	2
2022-09-14	11:49:21	-0.608435	-2.70644	248.393	FALSE	2
2022-09-14	11:49:21	-0.473829	-2.10769	255.227	FALSE	2
2022-09-14	11:49:21	-0.524109	-2.33134	248.393	FALSE	2
2022-09-14	11:49:22	-0.485839	-2.16111	255.227	FALSE	2
2022-09-14	11:49:22	-0.514999	-2.29082	248.393	FALSE	2
2022-09-14	11:49:22	-0.554287	-2.46558	255.227	FALSE	2
2022-09-14	11:49:23	-0.419936	-1.86796	248.393	FALSE	2
2022-09-14	11:49:23	-0.47271	-2.10271	255.227	FALSE	2
2022-09-14	11:49:23	-0.480903	-2.13915	248.393	FALSE	2
2022-09-14	11:49:23	-0.566399	-2.51946	255.227	FALSE	2
2022-09-14	11:49:24	-0.437799	-1.94742	248.393	FALSE	2
2022-09-14	11:49:24	-0.458816	-2.04091	255.227	FALSE	2
2022-09-14	11:49:24	-0.539885	-2.40152	248.393	FALSE	2
2022-09-14	11:49:24	-0.501615	-2.23128	255.227	FALSE	2
2022-09-14	11:49:25	-0.522022	-2.32206	248.393	FALSE	2
2022-09-14	11:49:25	-0.308079	-1.3704	255.227	FALSE	2
2022-09-14	11:49:25	-0.359529	-1.59926	248.393	FALSE	2
2022-09-14	11:49:25	-0.437239	-1.94493	255.227	FALSE	2
2022-09-14	11:49:26	-0.430419	-1.91459	248.393	FALSE	2
2022-09-14	11:49:26	-0.512964	-2.28177	255.227	FALSE	2
2022-09-14	11:49:26	-0.281921	-1.25404	248.393	FALSE	2
2022-09-14	11:49:27	-0.272353	-1.21148	255.227	FALSE	2
2022-09-14	11:49:27	-0.260496	-1.15874	248.393	FALSE	2
2022-09-14	11:49:27	-0.315916	-1.40526	255.227	FALSE	2
2022-09-14	11:49:27	-0.185992	-0.82733	248.393	FALSE	2
2022-09-14	11:49:28	-0.109707	-0.487999	255.227	FALSE	2
2022-09-14	11:49:28	-0.234745	-1.04419	248.393	FALSE	2
2022-09-14	11:49:28	-0.0972389	-0.432538	255.227	FALSE	2
2022-09-14	11:49:28	0.283524	1.26117	249.654	FALSE	2
2022-09-14	11:49:29	0.336908	1.49863	256.725	FALSE	2
2022-09-14	11:49:29	0.207443	0.922748	250.577	FALSE	2
2022-09-14	11:49:29	0.130802	0.581833	257.307	FALSE	2
2022-09-14	11:49:29	0.127138	0.565535	251.142	FALSE	2
2022-09-14	11:49:30	0.162659	0.72354	258.031	FALSE	2
2022-09-14	11:49:30	-0.0164756	-0.0732868	251.142	FALSE	2
2022-09-14	11:49:30	0.0210308	0.0935492	258.124	FALSE	2
2022-09-14	11:49:31	0.0530918	0.236163	251.379	FALSE	2
2022-09-14	11:49:31	0.0589952	0.262422	258.386	FALSE	2
2022-09-14	11:49:31	-0.153626	-0.683359	251.379	FALSE	2
2022-09-14	11:49:31	-0.0476715	-0.212052	258.386	FALSE	2
2022-09-14	11:49:32	-0.0451778	-0.20096	251.379	FALSE	2
2022-09-14	11:49:32	0.0927865	0.412733	258.799	FALSE	2
2022-09-14	11:49:32	0.179708	0.799377	252.178	FALSE	2
2022-09-14	11:49:32	0.128512	0.571647	259.371	FALSE	2
2022-09-14	11:49:33	0.239351	1.06468	253.243	FALSE	2
2022-09-14	11:49:33	-0.0854832	-0.380246	259.371	FALSE	2
2022-09-14	11:49:33	0.163881	0.728975	253.972	FALSE	2
2022-09-14	11:49:33	0.139453	0.620315	259.991	FALSE	2
2022-09-14	11:49:34	0.35701	1.58805	255.56	FALSE	2
2022-09-14	11:49:34	0.00917326	0.0408045	260.032	FALSE	2
2022-09-14	11:49:34	0.321183	1.42869	256.988	FALSE	2
2022-09-14	11:49:35	0.32042	1.42529	261.457	FALSE	2
2022-09-14	11:49:35	0.280674	1.24849	258.237	FALSE	2
2022-09-14	11:49:35	0.233295	1.03774	262.495	FALSE	2
2022-09-14	11:49:35	0.207392	0.922521	259.159	FALSE	2
2022-09-14	11:49:36	0.299351	1.33157	263.827	FALSE	2
2022-09-14	11:49:36	0.268003	1.19213	260.352	FALSE	2
2022-09-14	11:49:36	0.431311	1.91856	265.745	FALSE	2
2022-09-14	11:49:36	0.209275	0.930897	261.282	FALSE	2
2022-09-14	11:49:37	0.392023	1.7438	267.489	FALSE	2
2022-09-14	11:49:37	0.33813	1.50407	262.787	FALSE	2
2022-09-14	11:49:37	0.340725	1.51561	269.005	FALSE	2
2022-09-14	11:49:37	0.372939	1.65891	264.445	FALSE	2
2022-09-14	11:49:38	0.264338	1.17583	270.18	FALSE	2
2022-09-14	11:49:38	0.403779	1.79609	266.242	FALSE	2
2022-09-14	11:49:38	0.299046	1.33022	271.511	FALSE	2
2022-09-14	11:49:39	0.461794	2.05415	268.296	FALSE	2
2022-09-14	11:49:39	0.303066	1.3481	272.859	FALSE	2
2022-09-14	11:49:39	0.372227	1.65574	269.951	FALSE	2
2022-09-14	11:49:39	0.310395	1.3807	274.239	FALSE	2
2022-09-14	11:49:40	0.340776	1.51584	271.467	FALSE	2
2022-09-14	11:49:40	0.383524	1.70599	275.945	FALSE	2
2022-09-14	11:49:40	0.278384	1.23831	272.706	FALSE	2
2022-09-14	11:49:40	0.473499	2.10622	278.052	FALSE	2
2022-09-14	11:49:41	0.339758	1.51131	274.217	FALSE	2
2022-09-14	11:49:41	0.422506	1.87939	279.931	FALSE	2
2022-09-14	11:49:41	0.339606	1.51064	275.727	FALSE	2
2022-09-14	11:49:41	0.348919	1.55206	281.483	FALSE	2
2022-09-14	11:49:42	0.425764	1.89388	277.621	FALSE	2
2022-09-14	11:49:42	0.331565	1.47487	282.958	FALSE	2
2022-09-14	11:49:42	0.467341	2.07883	279.7	FALSE	2
2022-09-14	11:49:43	0.350496	1.55908	284.517	FALSE	2
2022-09-14	11:49:43	0.373244	1.66026	281.36	FALSE	2
2022-09-14	11:49:43	0.349275	1.55365	286.071	FALSE	2
2022-09-14	11:49:43	0.337316	1.50045	282.861	FALSE	2
2022-09-14	11:49:44	0.512735	2.28075	288.351	FALSE	2
2022-09-14	11:49:44	0.323575	1.43933	284.3	FALSE	2
2022-09-14	11:49:44	0.386323	1.71844	290.07	FALSE	2
2022-09-14	11:49:44	0.365865	1.62744	285.928	FALSE	2
2022-09-14	11:49:45	0.323677	1.43978	291.51	FALSE	2
2022-09-14	11:49:45	0.454008	2.01952	287.947	FALSE	2
2022-09-14	11:49:45	0.316858	1.40945	292.919	FALSE	2
2022-09-14	11:49:45	0.439504	1.955	289.902	FALSE	2
2022-09-14	11:49:46	0.382099	1.69965	294.619	FALSE	2
2022-09-14	11:49:46	0.41869	1.86242	291.765	FALSE	2
2022-09-14	11:49:46	0.407952	1.81465	296.433	FALSE	2
2022-09-14	11:49:47	0.311565	1.3859	293.151	FALSE	2
2022-09-14	11:49:47	0.480522	2.13746	298.571	FALSE	2
2022-09-14	11:49:47	0.358639	1.5953	294.746	FALSE	2
2022-09-14	11:49:47	0.412176	1.83344	300.404	FALSE	2
2022-09-14	11:49:48	0.400216	1.78024	296.526	FALSE	2
2022-09-14	11:49:48	0.297824	1.32478	301.729	FALSE	2
2022-09-14	11:49:48	0.38154	1.69717	298.223	FALSE	2
2022-09-14	11:49:48	0.312277	1.38907	303.118	FALSE	2
2022-09-14	11:49:49	0.352634	1.56859	299.792	FALSE	2
2022-09-14	11:49:49	0.454415	2.02133	305.139	FALSE	2
2022-09-14	11:49:49	0.346883	1.543	301.335	FALSE	2
2022-09-14	11:49:49	0.384593	1.71075	306.85	FALSE	2
2022-09-14	11:49:50	0.282456	1.25642	302.591	FALSE	2
2022-09-14	11:49:50	0.309886	1.37843	308.229	FALSE	2
2022-09-14	11:49:50	0.520064	2.31335	304.905	FALSE	2
2022-09-14	11:49:51	0.37986	1.68969	309.918	FALSE	2
2022-09-14	11:49:51	0.2907	1.29309	306.198	FALSE	2
2022-09-14	11:49:51	0.37411	1.66412	311.582	FALSE	2
2022-09-14	11:49:51	0.210242	0.935198	307.133	FALSE	2
2022-09-14	11:49:52	0.308206	1.37096	312.953	FALSE	2
2022-09-14	11:49:52	0.312023	1.38794	308.521	FALSE	2
2022-09-14	11:49:52	0.23528	1.04657	314	FALSE	2
2022-09-14	11:49:52	0.435026	1.93508	310.456	FALSE	2
2022-09-14	11:49:53	0.312227	1.38885	315.389	FALSE	2
2022-09-14	11:49:53	0.279504	1.24329	311.699	FALSE	2
2022-09-14	11:49:53	0.445458	1.98149	317.37	FALSE	2
2022-09-14	11:49:53	0.295789	1.31573	313.015	FALSE	2
2022-09-14	11:49:54	0.32673	1.45336	318.824	FALSE	2
2022-09-14	11:49:54	0.274669	1.22178	314.237	FALSE	2
2022-09-14	11:49:54	0.240216	1.06853	319.892	FALSE	2
2022-09-14	11:49:55	0.429529	1.91063	316.147	FALSE	2
2022-09-14	11:49:55	0.295992	1.31663	321.209	FALSE	2
2022-09-14	11:49:55	0.245509	1.09207	317.239	FALSE	2
2022-09-14	11:49:55	0.423473	1.88369	323.093	FALSE	2
2022-09-14	11:49:56	0.325865	1.44951	318.689	FALSE	2
2022-09-14	11:49:56	0.378537	1.68381	324.776	FALSE	2
2022-09-14	11:49:56	0.357977	1.59235	320.281	FALSE	2
2022-09-14	11:49:56	0.446171	1.98466	326.761	FALSE	2
2022-09-14	11:49:57	0.903219	4.0177	324.299	FALSE	2
2022-09-14	11:49:57	0.945967	4.20785	330.969	FALSE	2
2022-09-14	11:49:57	0.835789	3.71776	328.017	FALSE	2
2022-09-14	11:49:57	0.516043	2.29546	333.264	FALSE	2
2022-09-14	11:49:58	0.454415	2.02133	330.038	FALSE	2
2022-09-14	11:49:58	0.417926	1.85902	335.123	FALSE	2
2022-09-14	11:49:58	0.458435	2.03921	332.077	FALSE	2
2022-09-14	11:49:59	0.432379	1.92331	337.047	FALSE	2
2022-09-14	11:49:59	0.416247	1.85155	333.929	FALSE	2
2022-09-14	11:49:59	0.424033	1.88618	338.933	FALSE	2
2022-09-14	11:49:59	0.45986	2.04555	335.974	FALSE	2
2022-09-14	11:50:00	0.37187	1.65415	340.587	FALSE	2
2022-09-14	11:50:00	0.401743	1.78703	337.761	FALSE	2
2022-09-14	11:50:00	0.378741	1.68472	342.272	FALSE	2
2022-09-14	11:50:00	0.400878	1.78319	339.545	FALSE	2
2022-09-14	11:50:01	0.409428	1.82122	344.093	FALSE	2
2022-09-14	11:50:01	0.369529	1.64374	341.188	FALSE	2
2022-09-14	11:50:01	0.38042	1.69218	345.785	FALSE	2
2022-09-14	11:50:01	0.455483	2.02608	343.214	FALSE	2
2022-09-14	11:50:02	0.359249	1.59801	347.383	FALSE	2
2022-09-14	11:50:02	0.376349	1.67408	344.888	FALSE	2
2022-09-14	11:50:02	0.347494	1.54572	348.929	FALSE	2
2022-09-14	11:50:03	0.361489	1.60798	346.496	FALSE	2
2022-09-14	11:50:03	0.412532	1.83502	350.764	FALSE	2
2022-09-14	11:50:03	0.376043	1.67271	348.169	FALSE	2
2022-09-14	11:50:03	0.413041	1.83729	352.601	FALSE	2
2022-09-14	11:50:04	0.441896	1.96564	350.135	FALSE	2
2022-09-14	11:50:04	0.570038	2.53564	355.137	FALSE	2
2022-09-14	11:50:04	0.436349	1.94097	352.076	FALSE	2
2022-09-14	11:50:04	0.467952	2.08154	357.218	FALSE	2
2022-09-14	11:50:05	0.506629	2.25359	354.329	FALSE	2
2022-09-14	11:50:05	0.415076	1.84634	359.065	FALSE	2
2022-09-14	11:50:05	0.512125	2.27803	356.607	FALSE	2
2022-09-14	11:50:05	0.558486	2.48426	361.549	FALSE	2
2022-09-14	11:50:06	0.595178	2.64747	359.255	FALSE	2
2022-09-14	11:50:06	0.602659	2.68075	364.23	FALSE	2
2022-09-14	11:50:06	0.599657	2.66739	361.922	FALSE	2
2022-09-14	11:50:07	0.679148	3.02099	367.251	FALSE	2
2022-09-14	11:50:07	0.670496	2.9825	364.905	FALSE	2
2022-09-14	11:50:07	0.6536	2.90734	370.158	FALSE	2
2022-09-14	11:50:07	0.632277	2.81249	367.717	FALSE	2
2022-09-14	11:50:08	0.652277	2.90146	373.059	FALSE	2
2022-09-14	11:50:08	0.697163	3.10112	370.818	FALSE	2
2022-09-14	11:50:08	0.708206	3.15024	376.21	FALSE	2
2022-09-14	11:50:08	1.07961	4.80232	375.621	FALSE	2
2022-09-14	11:50:09	0.358842	1.5962	377.806	FALSE	2
2022-09-14	11:50:09	0.436145	1.94006	377.561	FALSE	2
2022-09-14	11:50:09	0.414873	1.84544	379.651	FALSE	2
2022-09-14	11:50:09	0.450395	2.00345	379.564	FALSE	2
2022-09-14	11:50:10	0.448613	1.99552	381.647	FALSE	2
2022-09-14	11:50:10	0.425611	1.8932	381.457	FALSE	2
2022-09-14	11:50:10	0.427087	1.89977	383.547	FALSE	2
2022-09-14	11:50:11	0.381489	1.69694	383.154	FALSE	2
2022-09-14	11:50:11	0.381998	1.6992	385.246	FALSE	2
2022-09-14	11:50:11	0.396959	1.76575	384.92	FALSE	2
2022-09-14	11:50:11	0.415738	1.84929	387.095	FALSE	2
2022-09-14	11:50:12	0.408868	1.81873	386.739	FALSE	2
2022-09-14	11:50:12	0.405356	1.8031	388.898	FALSE	2
2022-09-14	11:50:12	0.478486	2.1284	388.867	FALSE	2
2022-09-14	11:50:12	0.57014	2.5361	391.434	FALSE	2
2022-09-14	11:50:13	0.663371	2.95081	391.818	FALSE	2
2022-09-14	11:50:13	0.535178	2.38058	393.815	FALSE	2
2022-09-14	11:50:13	0.581438	2.58635	394.404	FALSE	2
2022-09-14	11:50:13	1.01411	4.51096	398.326	FALSE	2
2022-09-14	11:50:14	0.46897	2.08607	396.49	FALSE	2
2022-09-14	11:50:14	0.610903	2.71742	401.043	FALSE	2
2022-09-14	11:50:14	0.501336	2.23004	398.721	FALSE	2
2022-09-14	11:50:15	0.449529	1.99959	403.043	FALSE	2
2022-09-14	11:50:15	0.428512	1.90611	400.627	FALSE	2
2022-09-14	11:50:15	0.480064	2.13542	405.178	FALSE	2
2022-09-14	11:50:15	0.440216	1.95817	402.585	FALSE	2
2022-09-14	11:50:16	0.452023	2.01069	407.189	FALSE	2
2022-09-14	11:50:16	0.504695	2.24498	404.83	FALSE	2
2022-09-14	11:50:16	0.566171	2.51844	409.707	FALSE	2
2022-09-14	11:50:16	0.784847	3.49116	408.321	FALSE	2
2022-09-14	11:50:17	1.47854	6.57684	416.284	FALSE	2
2022-09-14	11:50:17	1.76617	7.85628	416.177	FALSE	2
2022-09-14	11:50:17	2.31223	10.2853	426.57	FALSE	2
2022-09-14	11:50:17	1.60958	7.15973	423.337	FALSE	2
2022-09-14	11:50:18	1.17029	5.20568	431.775	FALSE	2
2022-09-14	11:50:18	1.28678	5.72385	429.061	FALSE	2
2022-09-14	11:50:18	-1.25871	-5.59899	431.775	FALSE	2
2022-09-14	11:50:19	0.689631	3.06762	432.128	FALSE	2
2022-09-14	11:50:19	0.775534	3.44973	435.225	FALSE	2
2022-09-14	11:50:19	1.06912	4.75566	436.884	FALSE	2
2022-09-14	11:50:19	1.31375	5.84382	441.069	FALSE	2
2022-09-14	11:50:20	1.41961	6.31471	443.199	FALSE	2
2022-09-14	11:50:20	1.32098	5.87598	446.945	FALSE	2
2022-09-14	11:50:20	1.05085	4.67439	447.873	FALSE	2
2022-09-14	11:50:20	-1.24411	-5.53405	446.945	FALSE	2
2022-09-14	11:50:21	0.83874	3.73088	451.604	FALSE	2
2022-09-14	11:50:21	0.772125	3.43457	450.379	FALSE	2
2022-09-14	11:50:21	0.739962	3.2915	454.896	FALSE	2
2022-09-14	11:50:21	0.831463	3.69851	454.078	FALSE	2
2022-09-14	11:50:22	0.834415	3.71164	458.607	FALSE	2
2022-09-14	11:50:22	0.749987	3.33609	457.414	FALSE	2
2022-09-14	11:50:22	0.663015	2.94922	461.556	FALSE	2
2022-09-14	11:50:23	1.05625	4.69841	462.112	FALSE	2
2022-09-14	11:50:23	1.24108	5.52057	467.077	FALSE	2
2022-09-14	11:50:23	0.922405	4.10304	466.215	FALSE	2
2022-09-14	11:50:23	0.764338	3.39993	470.477	FALSE	2
2022-09-14	11:50:24	0.921234	4.09783	470.313	FALSE	2
2022-09-14	11:50:24	0.92673	4.12228	474.599	FALSE	2
2022-09-14	11:50:24	1.11095	4.94173	475.255	FALSE	2
2022-09-14	11:50:24	1.11279	4.94991	479.549	FALSE	2
2022-09-14	11:50:25	1.5649	6.96099	482.216	FALSE	2
2022-09-14	11:50:25	2.80439	12.4745	492.024	FALSE	2
2022-09-14	11:50:25	2.3996	10.6739	492.89	FALSE	2
2022-09-14	11:50:25	2.7677	12.3113	504.335	FALSE	2
2022-09-14	11:50:26	0.910038	4.04803	496.938	FALSE	2
2022-09-14	11:50:26	0.210853	0.937916	505.273	FALSE	2
2022-09-14	11:50:26	0.440369	1.95885	498.897	FALSE	2
2022-09-14	11:50:27	0.363473	1.6168	506.89	FALSE	2
2022-09-14	11:50:27	0.448053	1.99303	500.89	FALSE	2
2022-09-14	11:50:27	0.136603	0.607637	507.497	FALSE	2
2022-09-14	11:50:27	0.363779	1.61816	502.508	FALSE	2
2022-09-14	11:50:28	0.348664	1.55093	509.048	FALSE	2
2022-09-14	11:50:28	0.297112	1.32161	503.83	FALSE	2
2022-09-14	11:50:28	0.104084	0.462986	509.511	FALSE	2
2022-09-14	11:50:28	0.438791	1.95183	505.781	FALSE	2
2022-09-14	11:50:29	0.466629	2.07566	511.587	FALSE	2
2022-09-14	11:50:29	0.602608	2.68052	508.462	FALSE	2
2022-09-14	11:50:29	0.455738	2.02721	513.614	FALSE	2
2022-09-14	11:50:29	0.42612	1.89547	510.357	FALSE	2
2022-09-14	11:50:30	0.382252	1.70033	515.314	FALSE	2
2022-09-14	11:50:30	0.351158	1.56202	511.919	FALSE	2
2022-09-14	11:50:30	0.370496	1.64804	516.962	FALSE	2
2022-09-14	11:50:31	0.30215	1.34402	513.263	FALSE	2
2022-09-14	11:50:31	0.500471	2.2262	519.189	FALSE	2
2022-09-14	11:50:31	0.260573	1.15908	514.422	FALSE	2
2022-09-14	11:50:31	0.397316	1.76734	520.956	FALSE	2
2022-09-14	11:50:32	0.245	1.08981	515.512	FALSE	2
2022-09-14	11:50:32	0.410344	1.82529	522.781	FALSE	2
2022-09-14	11:50:32	0.451056	2.00639	517.519	FALSE	2
2022-09-14	11:50:32	0.508817	2.26332	525.045	FALSE	2
2022-09-14	11:50:33	0.340064	1.51267	519.031	FALSE	2
2022-09-14	11:50:33	0.402812	1.79179	526.836	FALSE	2
2022-09-14	11:50:33	0.288155	1.28177	520.313	FALSE	2
2022-09-14	11:50:33	0.319148	1.41963	528.256	FALSE	2
2022-09-14	11:50:34	0.311107	1.38387	521.697	FALSE	2
2022-09-14	11:50:34	0.17869	0.794849	529.051	FALSE	2
2022-09-14	11:50:34	0.274873	1.22269	522.92	FALSE	2
2022-09-14	11:50:35	-0.00955446	-0.0425001	529.051	FALSE	2
2022-09-14	11:50:35	-0.0211066	-0.0938864	522.92	FALSE	2
2022-09-14	11:50:35	-0.00619567	-0.0275596	529.051	FALSE	2
2022-09-14	11:50:35	0.0824048	0.366553	523.286	FALSE	2
2022-09-14	11:50:36	0.280471	1.24759	530.298	FALSE	2
2022-09-14	11:50:36	0.526832	2.34345	525.63	FALSE	2
2022-09-14	11:50:36	0.496909	2.21035	532.509	FALSE	2
2022-09-14	11:50:36	0.29355	1.30577	526.935	FALSE	2
2022-09-14	11:50:37	0.206272	0.917539	533.426	FALSE	2
2022-09-14	11:50:37	0.0113616	0.0505387	526.986	FALSE	2
2022-09-14	11:50:37	-0.0901651	-0.401072	533.426	FALSE	2
2022-09-14	11:50:37	-0.181208	-0.806049	526.986	FALSE	2
2022-09-14	11:50:38	-0.430063	-1.91301	533.426	FALSE	2
2022-09-14	11:50:38	-0.375356	-1.66966	526.986	FALSE	2
2022-09-14	11:50:38	-0.370267	-1.64702	533.426	FALSE	2
2022-09-14	11:50:39	-0.391895	-1.74323	526.986	FALSE	2
2022-09-14	11:50:39	-0.36701	-1.63253	533.426	FALSE	2
2022-09-14	11:50:39	-0.320852	-1.42721	526.986	FALSE	2
2022-09-14	11:50:39	-0.21042	-0.93599	533.426	FALSE	2
2022-09-14	11:50:40	-0.210725	-0.937347	526.986	FALSE	2
2022-09-14	11:50:40	-0.132964	-0.59145	533.426	FALSE	2
2022-09-14	11:50:40	-0.162989	-0.725008	526.986	FALSE	2
2022-09-14	11:50:40	-0.26014	-1.15715	533.426	FALSE	2
2022-09-14	11:50:41	-0.252455	-1.12297	526.986	FALSE	2
2022-09-14	11:50:41	-0.236577	-1.05234	533.426	FALSE	2
2022-09-14	11:50:41	-0.186043	-0.827556	526.986	FALSE	2
2022-09-14	11:50:41	-0.199122	-0.885734	533.426	FALSE	2
2022-09-14	11:50:42	-0.23617	-1.05053	526.986	FALSE	2
2022-09-14	11:50:42	-0.235712	-1.04849	533.426	FALSE	2
2022-09-14	11:50:42	0.115535	0.513923	527.5	FALSE	2
2022-09-14	11:50:43	0.128054	0.56961	533.996	FALSE	2
2022-09-14	11:50:43	0.391819	1.74289	529.243	FALSE	2
2022-09-14	11:50:43	0.217875	0.969152	534.965	FALSE	2
2022-09-14	11:50:43	0.155738	0.692754	529.936	FALSE	2
2022-09-14	11:50:44	0.375534	1.67045	536.636	FALSE	2
2022-09-14	11:50:44	0.229478	1.02076	530.956	FALSE	2
2022-09-14	11:50:44	0.431565	1.91969	538.555	FALSE	2
2022-09-14	11:50:44	0.187545	0.834238	531.791	FALSE	2
2022-09-14	11:50:45	0.285255	1.26887	539.824	FALSE	2
2022-09-14	11:50:45	0.335433	1.49207	533.283	FALSE	2
2022-09-14	11:50:45	0.253804	1.12897	540.953	FALSE	2
2022-09-14	11:50:45	0.400471	1.78138	535.064	FALSE	2
2022-09-14	11:50:46	0.189377	0.842387	541.795	FALSE	2
2022-09-14	11:50:46	0.269224	1.19756	536.262	FALSE	2
2022-09-14	11:50:46	0.339555	1.51041	543.306	FALSE	2
2022-09-14	11:50:47	0.22897	1.0185	537.28	FALSE	2
2022-09-14	11:50:47	0.273143	1.21499	544.521	FALSE	2
2022-09-14	11:50:47	0.155687	0.692527	537.973	FALSE	2
2022-09-14	11:50:47	0.0998094	0.443972	544.965	FALSE	2
2022-09-14	11:50:48	0.278435	1.23853	539.211	FALSE	2
2022-09-14	11:50:48	0.202354	0.900111	545.865	FALSE	2
2022-09-14	11:50:48	0.142812	0.635256	539.846	FALSE	2
2022-09-14	11:50:48	0.0132445	0.0589142	545.924	FALSE	2
2022-09-14	11:50:49	-0.00700993	-0.0311816	539.846	FALSE	2
2022-09-14	11:50:49	0.116909	0.520035	546.444	FALSE	2
2022-09-14	11:50:49	0.103372	0.459819	540.306	FALSE	2
2022-09-14	11:50:49	0.0814379	0.362252	546.806	FALSE	2
2022-09-14	11:50:50	0.204746	0.910751	541.217	FALSE	2
2022-09-14	11:50:50	0.180573	0.803225	547.609	FALSE	2
2022-09-14	11:50:50	0.152837	0.67985	541.897	FALSE	2
2022-09-14	11:50:51	0.232837	1.03571	548.645	FALSE	2
2022-09-14	11:50:51	0.175687	0.781491	542.678	FALSE	2
2022-09-14	11:50:51	0.31131	1.38477	550.03	FALSE	2
2022-09-14	11:50:51	0.110395	0.491059	543.169	FALSE	2
2022-09-14	11:50:52	0.277723	1.23537	551.265	FALSE	2
2022-09-14	11:50:52	0.228104	1.01465	544.184	FALSE	2
2022-09-14	11:50:52	0.266578	1.18579	552.451	FALSE	2
2022-09-14	11:50:52	0.364797	1.62269	545.807	FALSE	2
2022-09-14	11:50:53	0.146934	0.653592	553.105	FALSE	2
2022-09-14	11:50:53	0.267596	1.19032	546.997	FALSE	2
2022-09-14	11:50:53	0.199351	0.886753	553.991	FALSE	2
2022-09-14	11:50:53	0.213397	0.949233	547.946	FALSE	2
2022-09-14	11:50:54	0.329377	1.46513	555.456	FALSE	2
2022-09-14	11:50:54	0.0768577	0.341878	548.288	FALSE	2
2022-09-14	11:50:54	0.213143	0.948103	556.405	FALSE	2
2022-09-14	11:50:55	0.295789	1.31573	549.604	FALSE	2
2022-09-14	11:50:55	0.364135	1.61975	558.024	FALSE	2
2022-09-14	11:50:55	0.761997	3.38952	552.993	FALSE	2
2022-09-14	11:50:55	0.338028	1.50362	559.528	FALSE	2
2022-09-14	11:50:56	0.252583	1.12354	554.117	FALSE	2
2022-09-14	11:50:56	0.286018	1.27227	560.8	FALSE	2
2022-09-14	11:50:56	0.308969	1.37436	555.491	FALSE	2
2022-09-14	11:50:56	0.372685	1.65778	562.458	FALSE	2
2022-09-14	11:50:57	0.220674	0.981602	556.473	FALSE	2
2022-09-14	11:50:57	0.298232	1.3266	563.785	FALSE	2
2022-09-14	11:50:57	0.284491	1.26547	557.738	FALSE	2
2022-09-14	11:50:57	0.279402	1.24284	565.027	FALSE	2
2022-09-14	11:50:58	0.311514	1.38568	559.124	FALSE	2
2022-09-14	11:50:58	0.337163	1.49977	566.527	FALSE	2
2022-09-14	11:50:58	0.313448	1.39428	560.518	FALSE	2
2022-09-14	11:50:59	0.288308	1.28245	567.81	FALSE	2
2022-09-14	11:50:59	0.331005	1.47238	561.991	FALSE	2
2022-09-14	11:50:59	0.497112	2.21125	570.021	FALSE	2
2022-09-14	11:50:59	1.03223	4.59157	566.582	FALSE	2
2022-09-14	11:51:00	2.2137	9.84698	579.868	FALSE	2
2022-09-14	11:51:00	2.1767	9.6824	576.265	FALSE	2
2022-09-14	11:51:00	2.36866	10.5363	590.404	FALSE	2
2022-09-14	11:51:00	2.95843	13.1597	589.424	FALSE	2
2022-09-14	11:51:01	3.53146	15.7086	606.113	1	3
2022-09-14	11:51:01	3.86429	17.1891	606.613	1	4
2022-09-14	11:51:01	2.59594	11.5473	617.66	FALSE	4
2022-09-14	11:51:01	2.60403	11.5832	618.197	FALSE	4
2022-09-14	11:51:02	2.40413	10.6941	628.354	FALSE	4
2022-09-14	11:51:02	2.09889	9.33628	627.533	FALSE	4
2022-09-14	11:51:02	2.55793	11.3782	639.732	FALSE	4
2022-09-14	11:51:03	3.88062	17.2618	644.795	1	5
2022-09-14	11:51:03	4.45284	19.8071	659.539	1	6
2022-09-14	11:51:03	4.01904	17.8775	662.672	1	7
2022-09-14	11:51:03	3.85497	17.1477	676.687	1	8
2022-09-14	11:51:04	4.35116	19.3548	682.027	1	9
2022-09-14	11:51:04	4.92398	21.9028	698.59	1	10
2022-09-14	11:51:04	5.47227	24.3418	706.369	1	11
2022-09-14	11:51:04	6.10464	27.1547	725.745	1	12
2022-09-14	11:51:05	6.21355	27.6391	734.008	1	13
2022-09-14	11:51:05	5.7792	25.707	751.452	1	14
2022-09-14	11:51:05	6.04378	26.8839	760.892	1	15
2022-09-14	11:51:05	6.27965	27.9331	779.385	1	16
2022-09-14	11:51:06	4.96103	22.0677	782.96	1	17
2022-09-14	11:51:06	3.49238	15.5348	794.92	1	18
2022-09-14	11:51:06	3.1592	14.0528	797.012	1	19
2022-09-14	11:51:07	2.52011	11.21	806.129	FALSE	19
2022-09-14	11:51:07	0.716552	3.18737	800.2	FALSE	19
2022-09-14	11:51:07	0.740267	3.29286	809.422	FALSE	19
2022-09-14	11:51:07	0.478893	2.13021	802.33	FALSE	19
2022-09-14	11:51:08	0.924898	4.11413	813.536	FALSE	19
2022-09-14	11:51:08	1.16887	5.19937	807.529	FALSE	19
2022-09-14	11:51:08	1.13156	5.03341	818.57	FALSE	19
2022-09-14	11:51:08	1.89513	8.42992	815.959	FALSE	19
2022-09-14	11:51:09	2.19192	9.7501	828.32	FALSE	19
2022-09-14	11:51:09	2.35223	10.4632	826.422	FALSE	19
2022-09-14	11:51:09	2.28088	10.1458	838.466	FALSE	19
2022-09-14	11:51:09	2.22128	9.8807	836.303	FALSE	19
2022-09-14	11:51:10	2.35335	10.4682	848.934	FALSE	19
2022-09-14	11:51:10	2.52642	11.238	847.541	FALSE	19
2022-09-14	11:51:10	2.55879	11.382	860.316	FALSE	19
2022-09-14	11:51:11	2.72581	12.1249	859.666	FALSE	19
2022-09-14	11:51:11	1.43365	6.37716	866.693	FALSE	19
2022-09-14	11:51:11	0.728512	3.24057	862.907	FALSE	19
2022-09-14	11:51:11	0.979504	4.35703	871.05	FALSE	19
2022-09-14	11:51:12	2.46098	10.9469	873.854	FALSE	19
2022-09-14	11:51:12	3.04093	13.5267	884.577	1	20
2022-09-14	11:51:12	3.15126	14.0174	887.871	1	21
2022-09-14	11:51:12	3.63355	16.1628	900.74	1	22
2022-09-14	11:51:13	3.5565	15.82	903.691	1	23
2022-09-14	11:51:13	4.03228	17.9364	918.676	1	24
2022-09-14	11:51:13	3.77161	16.7769	920.468	1	25
2022-09-14	11:51:13	4.94983	22.0178	940.694	1	26
2022-09-14	11:51:14	6.34968	28.2446	948.712	1	27
2022-09-14	11:51:14	6.56169	29.1877	969.882	1	28
2022-09-14	11:51:14	6.5197	29.0009	977.713	1	29
2022-09-14	11:51:15	6.2224	27.6785	997.56	1	30
2022-09-14	11:51:15	5.92245	26.3442	1004.06	1	31
2022-09-14	11:51:15	6.12413	27.2414	1024.8	1	32
2022-09-14	11:51:15	6.07741	27.0335	1031.09	1	33
2022-09-14	11:51:16	5.62357	25.0148	1049.82	1	34
2022-09-14	11:51:16	5.94474	26.4434	1057.53	1	35
2022-09-14	11:51:16	5.84413	25.9959	1075.81	1	36
2022-09-14	11:51:16	5.83141	25.9393	1083.47	1	37
2022-09-14	11:51:17	5.74215	25.5422	1101.35	1	38
2022-09-14	11:51:17	5.66042	25.1787	1108.65	1	39
2022-09-14	11:51:17	5.02184	22.3381	1123.69	1	40
2022-09-14	11:51:17	4.78322	21.2767	1129.93	1	41
2022-09-14	11:51:18	4.69966	20.905	1144.6	1	42
2022-09-14	11:51:18	4.26276	18.9616	1148.89	1	43
2022-09-14	11:51:18	3.83558	17.0614	1161.66	1	44
2022-09-14	11:51:19	3.73721	16.6239	1165.51	1	45
2022-09-14	11:51:19	3.38647	15.0637	1176.72	1	46
2022-09-14	11:51:19	3.3021	14.6884	1180.2	1	47
2022-09-14	11:51:19	2.75284	12.2452	1188.97	FALSE	47
2022-09-14	11:51:20	2.1767	9.6824	1189.89	FALSE	47
2022-09-14	11:51:20	1.93701	8.61621	1197.58	FALSE	47
2022-09-14	11:51:20	1.93131	8.59085	1198.48	FALSE	47
2022-09-14	11:51:20	2.39447	10.6511	1208.23	FALSE	47
2022-09-14	11:51:21	2.31065	10.2782	1208.75	FALSE	47
2022-09-14	11:51:21	2.99161	13.3073	1221.54	FALSE	47
2022-09-14	11:51:21	3.33981	14.8561	1223.61	1	48
2022-09-14	11:51:21	3.25263	14.4683	1236.01	1	49
2022-09-14	11:51:22	3.50301	15.5821	1239.19	1	50
2022-09-14	11:51:22	3.31441	14.7432	1250.75	1	51
2022-09-14	11:51:22	2.90724	12.932	1252.12	FALSE	51
2022-09-14	11:51:23	3.21049	14.2809	1265.03	1	52
2022-09-14	11:51:23	3.01482	13.4105	1265.54	1	53
2022-09-14	11:51:23	2.84245	12.6438	1277.68	FALSE	53
2022-09-14	11:51:23	1.7249	7.6727	1273.21	FALSE	53
2022-09-14	11:51:24	1.72444	7.67065	1285.35	FALSE	53
2022-09-14	11:51:24	1.84734	8.21734	1281.43	FALSE	53
2022-09-14	11:51:24	2.09279	9.30915	1294.66	FALSE	53
2022-09-14	11:51:24	0.868002	3.86105	1285.29	FALSE	53
2022-09-14	11:51:25	0.737417	3.28018	1297.94	FALSE	53
2022-09-14	11:51:25	0.72958	3.24532	1288.53	FALSE	53
2022-09-14	11:51:25	0.742964	3.30485	1301.24	FALSE	53
2022-09-14	11:51:25	0.737468	3.28041	1291.81	FALSE	53
2022-09-14	11:51:26	0.736654	3.27678	1304.52	FALSE	53
2022-09-14	11:51:26	0.734873	3.26886	1295.08	FALSE	53
2022-09-14	11:51:26	0.72841	3.24011	1307.76	FALSE	53
2022-09-14	11:51:27	0.736756	3.27724	1298.36	FALSE	53
2022-09-14	11:51:27	0.73355	3.26298	1311.02	FALSE	53
2022-09-14	11:51:27	0.731616	3.25437	1301.61	FALSE	53
2022-09-14	11:51:27	0.737315	3.27972	1314.3	FALSE	53
2022-09-14	11:51:28	0.738893	3.28674	1304.9	FALSE	53
2022-09-14	11:51:28	0.733957	3.26479	1317.57	FALSE	53
2022-09-14	11:51:28	0.729173	3.24351	1308.14	FALSE	53
2022-09-14	11:51:28	0.738791	3.28629	1320.85	FALSE	53
2022-09-14	11:51:29	0.730191	3.24804	1311.39	FALSE	53
2022-09-14	11:51:29	0.733193	3.26139	1324.12	FALSE	53
2022-09-14	11:51:29	0.733855	3.26433	1314.66	FALSE	53
2022-09-14	11:51:29	0.74042	3.29354	1327.41	FALSE	53
2022-09-14	11:51:30	0.731158	3.25234	1317.91	FALSE	53
2022-09-14	11:51:30	0.732074	3.25641	1330.67	FALSE	53
2022-09-14	11:51:30	0.735687	3.27248	1321.18	FALSE	53
2022-09-14	11:51:31	0.72841	3.24011	1333.91	FALSE	53
2022-09-14	11:51:31	0.73416	3.26569	1324.45	FALSE	53
2022-09-14	11:51:31	0.735992	3.27384	1337.18	FALSE	53
2022-09-14	11:51:31	0.735585	3.27203	1327.72	FALSE	53
2022-09-14	11:51:32	0.732532	3.25845	1340.44	FALSE	53
2022-09-14	11:51:32	0.738231	3.2838	1331	FALSE	53
2022-09-14	11:51:32	0.732583	3.25868	1343.7	FALSE	53
2022-09-14	11:51:32	0.743219	3.30599	1334.31	FALSE	53
2022-09-14	11:51:33	0.728817	3.24192	1346.94	FALSE	53
2022-09-14	11:51:33	0.737112	3.27882	1337.59	FALSE	53
2022-09-14	11:51:33	0.731768	3.25505	1350.19	FALSE	53
2022-09-14	11:51:33	0.735534	3.2718	1340.86	FALSE	53
2022-09-14	11:51:34	0.733346	3.26207	1353.46	FALSE	53
2022-09-14	11:51:34	0.735585	3.27203	1344.13	FALSE	53
2022-09-14	11:51:34	0.740369	3.29331	1356.75	FALSE	53
2022-09-14	11:51:35	0.739147	3.28787	1347.42	FALSE	53
2022-09-14	11:51:35	0.740267	3.29286	1360.04	FALSE	53
2022-09-14	11:51:35	0.728054	3.23853	1350.66	FALSE	53
2022-09-14	11:51:35	0.731819	3.25528	1363.3	FALSE	53
2022-09-14	11:51:36	0.732328	3.25754	1353.91	FALSE	53
2022-09-14	11:51:36	0.728919	3.24238	1366.54	FALSE	53
2022-09-14	11:51:36	0.737875	3.28222	1357.2	FALSE	53
2022-09-14	11:51:36	0.728613	3.24102	1369.78	FALSE	53
2022-09-14	11:51:37	0.732074	3.25641	1360.45	FALSE	53
2022-09-14	11:51:37	0.739147	3.28787	1373.07	FALSE	53
2022-09-14	11:51:37	0.734873	3.26886	1363.72	FALSE	53
2022-09-14	11:51:37	0.732074	3.25641	1376.32	FALSE	53
2022-09-14	11:51:38	0.728257	3.23943	1366.96	FALSE	53
2022-09-14	11:51:38	0.738588	3.28539	1379.61	FALSE	53
2022-09-14	11:51:38	0.738486	3.28493	1370.25	FALSE	53
2022-09-14	11:51:38	0.728206	3.23921	1382.85	FALSE	53
2022-09-14	11:51:39	0.729377	3.24441	1373.49	FALSE	53
2022-09-14	11:51:39	0.733448	3.26252	1386.11	FALSE	53
2022-09-14	11:51:39	0.735382	3.27113	1376.76	FALSE	53
2022-09-14	11:51:40	0.738282	3.28403	1389.4	FALSE	53
2022-09-14	11:51:40	0.739707	3.29036	1380.05	FALSE	53
2022-09-14	11:51:40	0.73701	3.27837	1392.67	FALSE	53
2022-09-14	11:51:40	0.737519	3.28063	1383.33	FALSE	53
2022-09-14	11:51:41	0.733092	3.26094	1395.93	FALSE	53
2022-09-14	11:51:41	0.734873	3.26886	1386.6	FALSE	53
2022-09-14	11:51:41	0.733346	3.26207	1399.2	FALSE	53
2022-09-14	11:51:41	0.738028	3.2829	1389.88	FALSE	53
2022-09-14	11:51:42	0.732074	3.25641	1402.45	FALSE	53
2022-09-14	11:51:42	0.732837	3.25981	1393.14	FALSE	53
2022-09-14	11:51:42	0.737773	3.28176	1405.74	FALSE	53
2022-09-14	11:51:42	0.738689	3.28584	1396.43	FALSE	53
2022-09-14	11:51:43	0.734211	3.26592	1409	FALSE	53
2022-09-14	11:51:43	0.735026	3.26954	1399.7	FALSE	53
2022-09-14	11:51:43	0.737773	3.28176	1412.28	FALSE	53
2022-09-14	11:51:44	0.726323	3.23083	1402.93	FALSE	53
2022-09-14	11:51:44	0.735789	3.27294	1415.56	FALSE	53
2022-09-14	11:51:44	0.726934	3.23355	1406.16	FALSE	53
2022-09-14	11:51:44	0.740267	3.29286	1418.85	FALSE	53
2022-09-14	11:51:45	0.735738	3.27271	1409.44	FALSE	53
2022-09-14	11:51:45	0.736399	3.27565	1422.12	FALSE	53
2022-09-14	11:51:45	0.725814	3.22857	1412.67	FALSE	53
2022-09-14	11:51:45	0.00785013	0.0349189	1422.16	FALSE	53
2022-09-14	11:51:46	-6.60355	-29.3739	1412.67	FALSE	53
2022-09-14	11:51:46	-5.46289	-24.3	1422.16	FALSE	53
2022-09-14	11:51:46	-0.356323	-1.585	1412.67	FALSE	53
2022-09-14	11:51:46	0.744694	3.31255	1425.47	FALSE	53
2022-09-14	11:51:47	0.736552	3.27633	1415.94	FALSE	53
2022-09-14	11:51:47	0.730038	3.24736	1428.72	FALSE	53
2022-09-14	11:51:47	0.734568	3.26751	1419.21	FALSE	53
2022-09-14	11:51:48	0.736349	3.27543	1431.99	FALSE	53
2022-09-14	11:51:48	0.828104	3.68357	1422.89	FALSE	53
2022-09-14	11:51:48	2.00637	8.92474	1440.92	FALSE	53
2022-09-14	11:51:48	3.00138	13.3507	1436.24	1	54
2022-09-14	11:51:49	1.79167	7.96971	1448.89	FALSE	54
2022-09-14	11:51:49	2.02897	9.02526	1445.27	FALSE	54
2022-09-14	11:51:49	1.76332	7.8436	1456.73	FALSE	54
2022-09-14	11:51:49	1.4965	6.65673	1451.93	FALSE	54
2022-09-14	11:51:50	2.11747	9.41893	1466.15	FALSE	54
2022-09-14	11:51:50	1.55462	6.91526	1458.84	FALSE	54
2022-09-14	11:51:50	0.735992	3.27384	1469.43	FALSE	54
2022-09-14	11:51:50	1.02754	4.5707	1463.41	FALSE	54
2022-09-14	11:51:51	0.648359	2.88403	1472.31	FALSE	54
2022-09-14	11:51:51	0.63243	2.81318	1466.22	FALSE	54
2022-09-14	11:51:51	0.507341	2.25675	1474.57	FALSE	54
2022-09-14	11:51:52	0.305865	1.36055	1467.58	FALSE	54
2022-09-14	11:51:52	0.455076	2.02427	1476.59	FALSE	54
2022-09-14	11:51:52	0.188054	0.836502	1468.42	FALSE	54
2022-09-14	11:51:52	0.340216	1.51335	1478.1	FALSE	54
2022-09-14	11:51:53	0.25528	1.13554	1469.56	FALSE	54
2022-09-14	11:51:53	0.37131	1.65166	1479.76	FALSE	54
2022-09-14	11:51:53	0.221489	0.985227	1470.54	FALSE	54
2022-09-14	11:51:53	0.212888	0.946968	1480.7	FALSE	54
2022-09-14	11:51:54	0.472837	2.10327	1472.65	FALSE	54
2022-09-14	11:51:54	0.587086	2.61148	1483.31	FALSE	54
2022-09-14	11:51:54	0.383779	1.70713	1474.35	FALSE	54
2022-09-14	11:51:54	0.488817	2.17436	1485.49	FALSE	54
2022-09-14	11:51:55	0.364593	1.62178	1475.97	FALSE	54
2022-09-14	11:51:55	0.504186	2.24272	1487.73	FALSE	54
2022-09-14	11:51:55	0.236654	1.05268	1477.03	FALSE	54
2022-09-14	11:51:56	0.488003	2.17073	1489.9	FALSE	54
2022-09-14	11:51:56	0.277265	1.23333	1478.26	FALSE	54
2022-09-14	11:51:56	0.520216	2.31402	1492.22	FALSE	54
2022-09-14	11:51:56	0.495534	2.20423	1480.46	FALSE	54
2022-09-14	11:51:57	0.971616	4.32194	1496.54	FALSE	54
2022-09-14	11:51:57	0.753041	3.34968	1483.81	FALSE	54
2022-09-14	11:51:57	1.07126	4.76518	1501.3	FALSE	54
2022-09-14	11:51:57	0.530903	2.36156	1486.18	FALSE	54
2022-09-14	11:51:58	0.620573	2.76043	1504.06	FALSE	54
2022-09-14	11:51:58	0.356043	1.58375	1487.76	FALSE	54
2022-09-14	11:51:58	0.416909	1.85449	1505.92	FALSE	54
2022-09-14	11:51:58	0.219199	0.975041	1488.73	FALSE	54
2022-09-14	11:51:59	0.276196	1.22858	1507.15	FALSE	54
2022-09-14	11:51:59	0.222761	0.990885	1489.73	FALSE	54
2022-09-14	11:51:59	0.363066	1.61499	1508.76	FALSE	54
2022-09-14	11:52:00	0.222252	0.988621	1490.71	FALSE	54
2022-09-14	11:52:00	0.467595	2.07996	1510.84	FALSE	54
2022-09-14	11:52:00	0.99645	4.43241	1495.15	FALSE	54
2022-09-14	11:52:00	1.50042	6.67417	1517.52	FALSE	54
2022-09-14	11:52:01	0.69299	3.08256	1498.23	FALSE	54
2022-09-14	11:52:01	0.493295	2.19427	1519.71	FALSE	54
2022-09-14	11:52:01	0.319606	1.42167	1499.65	FALSE	54
2022-09-14	11:52:01	0.201845	0.897847	1520.61	FALSE	54
2022-09-14	11:52:02	0.134822	0.599715	1500.25	FALSE	54
2022-09-14	11:52:02	-0.026501	-0.117882	1520.61	FALSE	54
2022-09-14	11:52:02	0.0427101	0.189983	1500.44	FALSE	54
2022-09-14	11:52:02	-0.0454832	-0.202318	1520.61	FALSE	54
2022-09-14	11:52:03	0.0073921	0.0328815	1500.47	FALSE	54
2022-09-14	11:52:03	-0.062328	-0.277247	1520.61	FALSE	54
2022-09-14	11:52:03	-0.149351	-0.664343	1500.47	FALSE	54
2022-09-14	11:52:04	-0.0434476	-0.193264	1520.61	FALSE	54
2022-09-14	11:52:04	-0.134236	-0.597109	1500.47	FALSE	54
2022-09-14	11:52:04	0.0324303	0.144256	1520.75	FALSE	54
2022-09-14	11:52:04	-0.0112847	-0.0501966	1500.47	FALSE	54
2022-09-14	11:52:05	0.0955855	0.425183	1521.18	FALSE	54
2022-09-14	11:52:05	-0.0104705	-0.0465749	1500.47	FALSE	54
2022-09-14	11:52:05	0.123932	0.551274	1521.73	FALSE	54
2022-09-14	11:52:05	0.381845	1.69852	1502.17	FALSE	54
2022-09-14	11:52:06	0.799555	3.55658	1525.28	FALSE	54
2022-09-14	11:52:06	0.864135	3.84385	1506.02	FALSE	54
2022-09-14	11:52:06	1.51701	6.74796	1532.03	FALSE	54
2022-09-14	11:52:06	1.49095	6.63204	1512.65	FALSE	54
2022-09-14	11:52:07	1.06525	4.73845	1536.77	FALSE	54
2022-09-14	11:52:07	0.65472	2.91233	1515.56	FALSE	54
2022-09-14	11:52:07	0.494669	2.20039	1538.97	FALSE	54
2022-09-14	11:52:08	0.464898	2.06796	1517.63	FALSE	54
2022-09-14	11:52:08	0.437723	1.94708	1540.92	FALSE	54
2022-09-14	11:52:08	0.25299	1.12535	1518.75	FALSE	54
2022-09-14	11:52:08	0.118028	0.525012	1541.44	FALSE	54
2022-09-14	11:52:09	0.0622521	0.27691	1519.03	FALSE	54
2022-09-14	11:52:09	0.218079	0.970059	1542.41	FALSE	54
2022-09-14	11:52:09	-0.127213	-0.565869	1519.03	FALSE	54
2022-09-14	11:52:09	-0.00802776	-0.0357091	1542.41	FALSE	54
2022-09-14	11:52:10	-0.0298089	-0.132596	1519.03	FALSE	54
2022-09-14	11:52:10	0.0457127	0.203339	1542.62	FALSE	54
2022-09-14	11:52:10	-0.0953051	-0.423936	1519.03	FALSE	54
2022-09-14	11:52:10	0.0340587	0.1515	1542.77	FALSE	54
2022-09-14	11:52:11	-0.172557	-0.767568	1519.03	FALSE	54
2022-09-14	11:52:11	-0.534643	-2.3782	1542.77	FALSE	54
2022-09-14	11:52:11	-0.649961	-2.89116	1519.03	FALSE	54
2022-09-14	11:52:12	-0.498715	-2.21838	1542.77	FALSE	54
2022-09-14	11:52:12	-0.077188	-0.343348	1519.03	FALSE	54
2022-09-14	11:52:12	-0.0974425	-0.433444	1542.77	FALSE	54
2022-09-14	11:52:12	0.186781	0.830839	1519.86	FALSE	54
2022-09-14	11:52:13	0.22897	1.0185	1543.79	FALSE	54
2022-09-14	11:52:13	-0.388333	-1.72738	1519.86	FALSE	54
2022-09-14	11:52:13	0.373906	1.66321	1545.45	FALSE	54
2022-09-14	11:52:13	0.477774	2.12523	1521.99	FALSE	54
2022-09-14	11:52:14	0.40729	1.81171	1547.26	FALSE	54
2022-09-14	11:52:14	0.495331	2.20333	1524.19	FALSE	54
2022-09-14	11:52:14	0.386985	1.72139	1548.98	FALSE	54
2022-09-14	11:52:14	0.558893	2.48607	1526.68	FALSE	54
2022-09-14	11:52:15	0.329682	1.46649	1550.45	FALSE	54
2022-09-14	11:52:15	0.469377	2.08788	1528.76	FALSE	54
2022-09-14	11:52:15	0.421082	1.87306	1552.32	FALSE	54
2022-09-14	11:52:16	0.481997	2.14402	1530.91	FALSE	54
2022-09-14	11:52:16	0.354211	1.5756	1553.9	FALSE	54
2022-09-14	11:52:16	1.24668	5.54548	1536.45	FALSE	54
2022-09-14	11:52:16	0.392837	1.74742	1555.65	FALSE	54
2022-09-14	11:52:17	0.541997	2.41091	1538.86	FALSE	54
2022-09-14	11:52:17	0.484898	2.15692	1557.8	FALSE	54
2022-09-14	11:52:17	0.400878	1.78319	1540.65	FALSE	54
2022-09-14	11:52:17	0.484695	2.15602	1559.96	FALSE	54

## Sheet: Ursula_harness_202291411471 (2)
Date	Time	Lbs	Total force x time			**GoPro Fitting: 1136
2022-09-14	11:47:02	0.335026	0.335026	FALSE	0
2022-09-14	11:47:02	0.322506	0.657532	FALSE	0
2022-09-14	11:47:02	0.368512	1.02604	FALSE	0
2022-09-14	11:47:02	0.388155	1.4142	FALSE	0
2022-09-14	11:47:02	0.371005	1.7852	FALSE	0
2022-09-14	11:47:03	0.417468	2.20267	FALSE	0
2022-09-14	11:47:03	0.530445	2.73312	FALSE	0
2022-09-14	11:47:03	0.324949	3.05807	FALSE	0
2022-09-14	11:47:04	0.472328	3.53039	FALSE	0
2022-09-14	11:47:04	0.414059	3.94445	FALSE	0
2022-09-14	11:47:04	0.380267	4.32472	FALSE	0
2022-09-14	11:47:04	0.39701	4.72173	FALSE	0
2022-09-14	11:47:05	0.377825	5.09955	FALSE	0
2022-09-14	11:47:05	0.36668	5.46623	FALSE	0
2022-09-14	11:47:05	0.352736	5.81897	FALSE	0
2022-09-14	11:47:05	0.353753	6.17272	FALSE	0
2022-09-14	11:47:06	0.347087	6.51981	FALSE	0
2022-09-14	11:47:06	0.347443	6.86725	FALSE	0
2022-09-14	11:47:06	0.356196	7.22345	FALSE	0
2022-09-14	11:47:06	0.357468	7.58092	FALSE	0
2022-09-14	11:47:07	0.354059	7.93498	FALSE	0
2022-09-14	11:47:07	0.36612	8.3011	FALSE	0
2022-09-14	11:47:07	0.362913	8.66401	FALSE	0
2022-09-14	11:47:08	0.356247	9.02026	FALSE	0
2022-09-14	11:47:08	0.351921	9.37218	FALSE	0
2022-09-14	11:47:08	0.355331	9.72751	FALSE	0
2022-09-14	11:47:08	0.36444	10.0919	FALSE	0
2022-09-14	11:47:09	0.355178	10.4471	FALSE	0
2022-09-14	11:47:09	0.345051	10.7922	FALSE	0
2022-09-14	11:47:09	0.347748	11.1399	FALSE	0
2022-09-14	11:47:09	0.35986	11.4998	FALSE	0
2022-09-14	11:47:10	0.355738	11.8555	FALSE	0
2022-09-14	11:47:10	0.351718	12.2072	FALSE	0
2022-09-14	11:47:10	0.317723	12.525	FALSE	0
2022-09-14	11:47:10	0.312379	12.8373	FALSE	0
2022-09-14	11:47:11	0.398639	13.236	FALSE	0
2022-09-14	11:47:11	0.201336	13.4373	FALSE	0
2022-09-14	11:47:11	0.0961452	13.5335	FALSE	0
2022-09-14	11:47:12	-0.00853663	13.5335	FALSE	0
2022-09-14	11:47:12	-0.0991218	13.5335	FALSE	0
2022-09-14	11:47:12	0.233702	13.7672	FALSE	0
2022-09-14	11:47:13	-0.0940837	13.7672	FALSE	0
2022-09-14	11:47:13	0.17299	13.9402	FALSE	0
2022-09-14	11:47:13	0.0405219	13.9807	FALSE	0
2022-09-14	11:47:13	-0.142888	13.9807	FALSE	0
2022-09-14	11:47:13	0.0526338	14.0333	FALSE	0
2022-09-14	11:47:14	0.214669	14.248	FALSE	0
2022-09-14	11:47:14	0.327901	14.5759	FALSE	0
2022-09-14	11:47:14	0.305713	14.8816	FALSE	0
2022-09-14	11:47:14	0.293906	15.1755	FALSE	0
2022-09-14	11:47:15	0.355942	15.5314	FALSE	0
2022-09-14	11:47:15	0.52785	16.0593	FALSE	0
2022-09-14	11:47:15	0.46388	16.5232	FALSE	0
2022-09-14	11:47:16	0.341234	16.8644	FALSE	0
2022-09-14	11:47:16	0.409529	17.2739	FALSE	0
2022-09-14	11:47:16	0.485814	17.7597	FALSE	0
2022-09-14	11:47:16	0.413702	18.1735	FALSE	0
2022-09-14	11:47:17	0.489936	18.6634	FALSE	0
2022-09-14	11:47:17	0.445865	19.1093	FALSE	0
2022-09-14	11:47:17	0.393041	19.5023	FALSE	0
2022-09-14	11:47:17	0.478639	19.9809	FALSE	0
2022-09-14	11:47:18	0.417621	20.3986	FALSE	0
2022-09-14	11:47:18	0.485051	20.8836	FALSE	0
2022-09-14	11:47:18	0.457672	21.3413	FALSE	0
2022-09-14	11:47:19	0.884796	22.2261	FALSE	0
2022-09-14	11:47:19	0.391412	22.6175	FALSE	0
2022-09-14	11:47:19	0.86103	23.4785	FALSE	0
2022-09-14	11:47:19	0.460318	23.9388	FALSE	0
2022-09-14	11:47:20	0.455789	24.3946	FALSE	0
2022-09-14	11:47:20	0.480522	24.8751	FALSE	0
2022-09-14	11:47:20	0.430089	25.3052	FALSE	0
2022-09-14	11:47:20	0.445255	25.7505	FALSE	0
2022-09-14	11:47:21	0.362405	26.1129	FALSE	0
2022-09-14	11:47:21	0.482201	26.5951	FALSE	0
2022-09-14	11:47:21	0.401947	26.997	FALSE	0
2022-09-14	11:47:21	0.435636	27.4327	FALSE	0
2022-09-14	11:47:22	0.358791	27.7915	FALSE	0
2022-09-14	11:47:22	0.507035	28.2985	FALSE	0
2022-09-14	11:47:22	0.399504	28.698	FALSE	0
2022-09-14	11:47:23	0.470751	29.1688	FALSE	0
2022-09-14	11:47:23	0.469784	29.6385	FALSE	0
2022-09-14	11:47:23	0.450395	30.0889	FALSE	0
2022-09-14	11:47:23	0.434669	30.5236	FALSE	0
2022-09-14	11:47:24	0.365916	30.8895	FALSE	0
2022-09-14	11:47:24	0.31869	31.2082	FALSE	0
2022-09-14	11:47:24	0.285255	31.4935	FALSE	0
2022-09-14	11:47:24	0.0638297	31.5573	FALSE	0
2022-09-14	11:47:25	0.298079	31.8554	FALSE	0
2022-09-14	11:47:25	0.126934	31.9823	FALSE	0
2022-09-14	11:47:25	-0.0839565	31.9823	FALSE	0
2022-09-14	11:47:25	-0.306348	31.9823	FALSE	0
2022-09-14	11:47:26	-0.489707	31.9823	FALSE	0
2022-09-14	11:47:26	-0.673422	31.9823	FALSE	0
2022-09-14	11:47:26	-0.822989	31.9823	FALSE	0
2022-09-14	11:47:27	-0.891182	31.9823	FALSE	0
2022-09-14	11:47:27	-0.819376	31.9823	FALSE	0
2022-09-14	11:47:27	-0.988485	31.9823	FALSE	0
2022-09-14	11:47:27	-0.82762	31.9823	FALSE	0
2022-09-14	11:47:28	-0.798256	31.9823	FALSE	0
2022-09-14	11:47:28	-0.80248	31.9823	FALSE	0
2022-09-14	11:47:28	-0.869147	31.9823	FALSE	0
2022-09-14	11:47:28	-0.435254	31.9823	FALSE	0
2022-09-14	11:47:29	-0.0247707	31.9823	FALSE	0
2022-09-14	11:47:29	0.267697	32.25	FALSE	0
2022-09-14	11:47:29	0.355942	32.6059	FALSE	0
2022-09-14	11:47:29	0.197875	32.8038	FALSE	0
2022-09-14	11:47:30	0.499249	33.3031	FALSE	0
2022-09-14	11:47:30	0.428563	33.7316	FALSE	0
2022-09-14	11:47:30	0.51584	34.2475	FALSE	0
2022-09-14	11:47:31	-0.098562	34.2475	FALSE	0
2022-09-14	11:47:31	0.0459163	34.2934	FALSE	0
2022-09-14	11:47:31	0.0234735	34.3169	FALSE	0
2022-09-14	11:47:31	0.088359	34.4052	FALSE	0
2022-09-14	11:47:32	0.0978756	34.5031	FALSE	0
2022-09-14	11:47:32	0.13182	34.6349	FALSE	0
2022-09-14	11:47:32	0.267697	34.9026	FALSE	0
2022-09-14	11:47:32	0.210649	35.1133	FALSE	0
2022-09-14	11:47:33	0.181947	35.2952	FALSE	0
2022-09-14	11:47:33	0.195992	35.4912	FALSE	0
2022-09-14	11:47:33	0.0647967	35.556	FALSE	0
2022-09-14	11:47:33	0.187595	35.7436	FALSE	0
2022-09-14	11:47:34	0.155433	35.899	FALSE	0
2022-09-14	11:47:34	0.182812	36.0818	FALSE	0
2022-09-14	11:47:34	0.059962	36.1418	FALSE	0
2022-09-14	11:47:35	0.282405	36.4242	FALSE	0
2022-09-14	11:47:35	0.103423	36.5276	FALSE	0
2022-09-14	11:47:35	0.268664	36.7963	FALSE	0
2022-09-14	11:47:35	0.0755346	36.8718	FALSE	0
2022-09-14	11:47:36	0.204288	37.0761	FALSE	0
2022-09-14	11:47:36	0.166578	37.2427	FALSE	0
2022-09-14	11:47:36	-0.0265519	37.2427	FALSE	0
2022-09-14	11:47:36	-0.276832	37.2427	FALSE	0
2022-09-14	11:47:37	-0.434236	37.2427	FALSE	0
2022-09-14	11:47:37	-0.382175	37.2427	FALSE	0
2022-09-14	11:47:37	-0.42304	37.2427	FALSE	0
2022-09-14	11:47:37	-0.32991	37.2427	FALSE	0
2022-09-14	11:47:38	-0.366246	37.2427	FALSE	0
2022-09-14	11:47:38	-0.207722	37.2427	FALSE	0
2022-09-14	11:47:38	-0.189809	37.2427	FALSE	0
2022-09-14	11:47:39	-0.128944	37.2427	FALSE	0
2022-09-14	11:47:39	-0.325687	37.2427	FALSE	0
2022-09-14	11:47:39	-0.275152	37.2427	FALSE	0
2022-09-14	11:47:39	-0.258613	37.2427	FALSE	0
2022-09-14	11:47:40	-0.274745	37.2427	FALSE	0
2022-09-14	11:47:40	-0.322379	37.2427	FALSE	0
2022-09-14	11:47:40	-0.164771	37.2427	FALSE	0
2022-09-14	11:47:40	-0.169351	37.2427	FALSE	0
2022-09-14	11:47:41	0.0958399	37.3385	FALSE	0
2022-09-14	11:47:41	-0.14528	37.3385	FALSE	0
2022-09-14	11:47:41	-0.0562211	37.3385	FALSE	0
2022-09-14	11:47:41	-0.0625315	37.3385	FALSE	0
2022-09-14	11:47:42	0.0177738	37.3563	FALSE	0
2022-09-14	11:47:42	0.152736	37.509	FALSE	0
2022-09-14	11:47:42	0.130649	37.6397	FALSE	0
2022-09-14	11:47:43	0.201692	37.8414	FALSE	0
2022-09-14	11:47:43	0.180166	38.0216	FALSE	0
2022-09-14	11:47:43	0.399962	38.4215	FALSE	0
2022-09-14	11:47:43	0.031158	38.4527	FALSE	0
2022-09-14	11:47:44	0.279097	38.7318	FALSE	0
2022-09-14	11:47:44	0.267392	38.9992	FALSE	0
2022-09-14	11:47:44	0.504389	39.5036	FALSE	0
2022-09-14	11:47:44	0.676348	40.1799	FALSE	0
2022-09-14	11:47:45	0.824338	41.0042	FALSE	0
2022-09-14	11:47:45	0.582608	41.5868	FALSE	0
2022-09-14	11:47:45	1.16454	42.7514	FALSE	0
2022-09-14	11:47:45	1.61691	44.3683	FALSE	0
2022-09-14	11:47:46	0.777773	45.1461	FALSE	0
2022-09-14	11:47:46	1.42917	46.5752	FALSE	0
2022-09-14	11:47:46	1.32383	47.8991	FALSE	0
2022-09-14	11:47:47	1.62078	49.5198	FALSE	0
2022-09-14	11:47:47	1.48184	51.0017	FALSE	0
2022-09-14	11:47:47	0.881031	51.8827	FALSE	0
2022-09-14	11:47:47	0.442608	52.3253	FALSE	0
2022-09-14	11:47:48	0.375484	52.7008	FALSE	0
2022-09-14	11:47:48	0.347138	53.0479	FALSE	0
2022-09-14	11:47:48	0.261692	53.3096	FALSE	0
2022-09-14	11:47:48	-0.0472644	53.3096	FALSE	0
2022-09-14	11:47:49	0.0834226	53.3931	FALSE	0
2022-09-14	11:47:49	0.3164	53.7095	FALSE	0
2022-09-14	11:47:49	0.309733	54.0192	FALSE	0
2022-09-14	11:47:49	-0.113931	54.0192	FALSE	0
2022-09-14	11:47:50	-0.329554	54.0192	FALSE	0
2022-09-14	11:47:50	-0.301259	54.0192	FALSE	0
2022-09-14	11:47:50	-0.236425	54.0192	FALSE	0
2022-09-14	11:47:51	-0.506654	54.0192	FALSE	0
2022-09-14	11:47:51	-0.654185	54.0192	FALSE	0
2022-09-14	11:47:51	-0.782378	54.0192	FALSE	0
2022-09-14	11:47:51	-0.720648	54.0192	FALSE	0
2022-09-14	11:47:52	-0.726602	54.0192	FALSE	0
2022-09-14	11:47:52	-0.646704	54.0192	FALSE	0
2022-09-14	11:47:52	-0.678409	54.0192	FALSE	0
2022-09-14	11:47:52	-0.538765	54.0192	FALSE	0
2022-09-14	11:47:53	-0.49444	54.0192	FALSE	0
2022-09-14	11:47:53	-0.552506	54.0192	FALSE	0
2022-09-14	11:47:53	-0.647315	54.0192	FALSE	0
2022-09-14	11:47:53	-0.665737	54.0192	FALSE	0
2022-09-14	11:47:54	-0.529656	54.0192	FALSE	0
2022-09-14	11:47:54	-0.545076	54.0192	FALSE	0
2022-09-14	11:47:54	-0.568231	54.0192	FALSE	0
2022-09-14	11:47:55	-0.551132	54.0192	FALSE	0
2022-09-14	11:47:55	-0.4893	54.0192	FALSE	0
2022-09-14	11:47:55	-0.405992	54.0192	FALSE	0
2022-09-14	11:47:55	-0.433168	54.0192	FALSE	0
2022-09-14	11:47:56	-0.303142	54.0192	FALSE	0
2022-09-14	11:47:56	-0.22299	54.0192	FALSE	0
2022-09-14	11:47:56	-0.279834	54.0192	FALSE	0
2022-09-14	11:47:56	-0.288028	54.0192	FALSE	0
2022-09-14	11:47:57	-0.323244	54.0192	FALSE	0
2022-09-14	11:47:57	-0.342379	54.0192	FALSE	0
2022-09-14	11:47:57	0.0234226	54.0426	FALSE	0
2022-09-14	11:47:57	0.0678501	54.1105	FALSE	0
2022-09-14	11:47:58	0.466272	54.5767	FALSE	0
2022-09-14	11:47:58	0.567901	55.1446	FALSE	0
2022-09-14	11:47:58	0.483779	55.6284	FALSE	0
2022-09-14	11:47:59	0.624542	56.253	FALSE	0
2022-09-14	11:47:59	0.585356	56.8383	FALSE	0
2022-09-14	11:47:59	0.387697	57.226	FALSE	0
2022-09-14	11:47:59	0.29757	57.5236	FALSE	0
2022-09-14	11:48:00	0.295636	57.8192	FALSE	0
2022-09-14	11:48:00	0.279504	58.0987	FALSE	0
2022-09-14	11:48:00	0.276501	58.3752	FALSE	0
2022-09-14	11:48:00	0.348003	58.7232	FALSE	0
2022-09-14	11:48:01	0.366934	59.0902	FALSE	0
2022-09-14	11:48:01	0.355331	59.4455	FALSE	0
2022-09-14	11:48:01	0.426221	59.8717	FALSE	0
2022-09-14	11:48:01	0.466985	60.3387	FALSE	0
2022-09-14	11:48:02	0.464949	60.8037	FALSE	0
2022-09-14	11:48:02	0.486018	61.2897	FALSE	0
2022-09-14	11:48:02	0.482354	61.772	FALSE	0
2022-09-14	11:48:03	0.473244	62.2453	FALSE	0
2022-09-14	11:48:03	0.476552	62.7218	FALSE	0
2022-09-14	11:48:03	0.511209	63.233	FALSE	0
2022-09-14	11:48:03	0.502252	63.7353	FALSE	0
2022-09-14	11:48:04	0.46271	64.198	FALSE	0
2022-09-14	11:48:04	0.441081	64.6391	FALSE	0
2022-09-14	11:48:04	0.500725	65.1398	FALSE	0
2022-09-14	11:48:04	0.494516	65.6343	FALSE	0
2022-09-14	11:48:05	0.450191	66.0845	FALSE	0
2022-09-14	11:48:05	0.501794	66.5863	FALSE	0
2022-09-14	11:48:05	0.496247	67.0825	FALSE	0
2022-09-14	11:48:05	0.500878	67.5834	FALSE	0
2022-09-14	11:48:06	0.485611	68.069	FALSE	0
2022-09-14	11:48:06	0.498588	68.5676	FALSE	0
2022-09-14	11:48:06	0.522404	69.09	FALSE	0
2022-09-14	11:48:07	0.500063	69.5901	FALSE	0
2022-09-14	11:48:07	0.496756	70.0868	FALSE	0
2022-09-14	11:48:07	0.529529	70.6164	FALSE	0
2022-09-14	11:48:07	0.51411	71.1305	FALSE	0
2022-09-14	11:48:08	0.477468	71.608	FALSE	0
2022-09-14	11:48:08	0.408257	72.0162	FALSE	0
2022-09-14	11:48:08	0.386629	72.4028	FALSE	0
2022-09-14	11:48:08	0.145509	72.5483	FALSE	0
2022-09-14	11:48:09	0.0255601	72.5739	FALSE	0
2022-09-14	11:48:09	0.659453	73.2334	FALSE	0
2022-09-14	11:48:09	0.446323	73.6797	FALSE	0
2022-09-14	11:48:09	-0.493625	73.6797	FALSE	0
2022-09-14	11:48:10	-0.336781	73.6797	FALSE	0
2022-09-14	11:48:10	-0.401666	73.6797	FALSE	0
2022-09-14	11:48:10	-0.342531	73.6797	FALSE	0
2022-09-14	11:48:11	-0.455966	73.6797	FALSE	0
2022-09-14	11:48:11	-0.502073	73.6797	FALSE	0
2022-09-14	11:48:11	-0.466043	73.6797	FALSE	0
2022-09-14	11:48:11	-0.501921	73.6797	FALSE	0
2022-09-14	11:48:12	-0.574185	73.6797	FALSE	0
2022-09-14	11:48:12	-0.478867	73.6797	FALSE	0
2022-09-14	11:48:12	-0.385534	73.6797	FALSE	0
2022-09-14	11:48:12	-0.392353	73.6797	FALSE	0
2022-09-14	11:48:13	-0.474491	73.6797	FALSE	0
2022-09-14	11:48:13	-0.155101	73.6797	FALSE	0
2022-09-14	11:48:13	-0.123855	73.6797	FALSE	0
2022-09-14	11:48:13	-0.00589033	73.6797	FALSE	0
2022-09-14	11:48:14	-0.090216	73.6797	FALSE	0
2022-09-14	11:48:14	0.174415	73.8541	FALSE	0
2022-09-14	11:48:14	0.0527865	73.9069	FALSE	0
2022-09-14	11:48:15	0.227952	74.1348	FALSE	0
2022-09-14	11:48:15	0.551005	74.6858	FALSE	0
2022-09-14	11:48:15	1.21905	75.9049	FALSE	0
2022-09-14	11:48:15	0.895636	76.8005	FALSE	0
2022-09-14	11:48:16	0.620267	77.4208	FALSE	0
2022-09-14	11:48:16	0.504084	77.9249	FALSE	0
2022-09-14	11:48:16	0.392735	78.3176	FALSE	0
2022-09-14	11:48:16	0.46841	78.786	FALSE	0
2022-09-14	11:48:17	0.259657	79.0457	FALSE	0
2022-09-14	11:48:17	0.0593005	79.105	FALSE	0
2022-09-14	11:48:17	-0.146348	79.105	FALSE	0
2022-09-14	11:48:17	0.0419977	79.147	FALSE	0
2022-09-14	11:48:18	0.226883	79.3739	FALSE	0
2022-09-14	11:48:18	0.323626	79.6975	FALSE	0
2022-09-14	11:48:18	0.115026	79.8125	FALSE	0
2022-09-14	11:48:19	0.37472	80.1872	FALSE	0
2022-09-14	11:48:19	0.314262	80.5015	FALSE	0
2022-09-14	11:48:19	0.395687	80.8972	FALSE	0
2022-09-14	11:48:19	0.183982	81.0812	FALSE	0
2022-09-14	11:48:20	0.347697	81.4289	FALSE	0
2022-09-14	11:48:20	0.265713	81.6946	FALSE	0
2022-09-14	11:48:20	0.352583	82.0472	FALSE	0
2022-09-14	11:48:20	0.0335498	82.0807	FALSE	0
2022-09-14	11:48:21	-0.185839	82.0807	FALSE	0
2022-09-14	11:48:21	-0.266552	82.0807	FALSE	0
2022-09-14	11:48:21	-0.285432	82.0807	FALSE	0
2022-09-14	11:48:21	-0.389656	82.0807	FALSE	0
2022-09-14	11:48:22	-0.130369	82.0807	FALSE	0
2022-09-14	11:48:22	0.0794022	82.1601	FALSE	0
2022-09-14	11:48:22	0.216451	82.3766	FALSE	0
2022-09-14	11:48:23	0.146985	82.5235	FALSE	0
2022-09-14	11:48:23	0.360573	82.8841	FALSE	0
2022-09-14	11:48:23	0.384746	83.2689	FALSE	0
2022-09-14	11:48:23	0.403473	83.6723	FALSE	0
2022-09-14	11:48:24	0.494466	84.1668	FALSE	0
2022-09-14	11:48:24	0.612277	84.7791	FALSE	0
2022-09-14	11:48:24	0.468054	85.2471	FALSE	0
2022-09-14	11:48:24	0.477265	85.7244	FALSE	0
2022-09-14	11:48:25	0.442863	86.1673	FALSE	0
2022-09-14	11:48:25	0.514415	86.6817	FALSE	0
2022-09-14	11:48:25	-0.178613	86.6817	FALSE	0
2022-09-14	11:48:25	-0.2579	86.6817	FALSE	0
2022-09-14	11:48:26	0.0550766	86.7368	FALSE	0
2022-09-14	11:48:26	0.137672	86.8744	FALSE	0
2022-09-14	11:48:26	0.242557	87.117	FALSE	0
2022-09-14	11:48:27	0.699962	87.8169	FALSE	0
2022-09-14	11:48:27	2.15217	89.9691	FALSE	0
2022-09-14	11:48:27	3.67971	93.6488	1	1
2022-09-14	11:48:27	4.24632	97.8951	1	2
2022-09-14	11:48:28	1.21238	99.1075	FALSE	2
2022-09-14	11:48:28	1.00373	100.111	FALSE	2
2022-09-14	11:48:28	0.611514	100.723	FALSE	2
2022-09-14	11:48:28	0.525254	101.248	FALSE	2
2022-09-14	11:48:29	0.638791	101.887	FALSE	2
2022-09-14	11:48:29	0.786781	102.674	FALSE	2
2022-09-14	11:48:29	0.653244	103.327	FALSE	2
2022-09-14	11:48:29	0.63818	103.965	FALSE	2
2022-09-14	11:48:30	0.691463	104.656	FALSE	2
2022-09-14	11:48:30	0.745713	105.402	FALSE	2
2022-09-14	11:48:30	0.740471	106.143	FALSE	2
2022-09-14	11:48:31	0.689886	106.833	FALSE	2
2022-09-14	11:48:31	0.752532	107.585	FALSE	2
2022-09-14	11:48:31	0.716807	108.302	FALSE	2
2022-09-14	11:48:31	0.821845	109.124	FALSE	2
2022-09-14	11:48:32	0.839707	109.963	FALSE	2
2022-09-14	11:48:32	0.621031	110.584	FALSE	2
2022-09-14	11:48:32	0.620369	111.205	FALSE	2
2022-09-14	11:48:32	0.636145	111.841	FALSE	2
2022-09-14	11:48:33	0.640165	112.481	FALSE	2
2022-09-14	11:48:33	0.646934	113.128	FALSE	2
2022-09-14	11:48:33	0.54383	113.672	FALSE	2
2022-09-14	11:48:33	0.521234	114.193	FALSE	2
2022-09-14	11:48:34	0.515178	114.708	FALSE	2
2022-09-14	11:48:34	0.52673	115.235	FALSE	2
2022-09-14	11:48:34	0.571921	115.807	FALSE	2
2022-09-14	11:48:35	0.599199	116.406	FALSE	2
2022-09-14	11:48:35	0.600522	117.007	FALSE	2
2022-09-14	11:48:35	0.504237	117.511	FALSE	2
2022-09-14	11:48:35	0.478537	117.989	FALSE	2
2022-09-14	11:48:36	0.430496	118.42	FALSE	2
2022-09-14	11:48:36	0.42729	118.847	FALSE	2
2022-09-14	11:48:36	0.458028	119.305	FALSE	2
2022-09-14	11:48:36	0.474669	119.78	FALSE	2
2022-09-14	11:48:37	0.423524	120.203	FALSE	2
2022-09-14	11:48:37	0.524898	120.728	FALSE	2
2022-09-14	11:48:37	0.469733	121.198	FALSE	2
2022-09-14	11:48:37	0.552736	121.751	FALSE	2
2022-09-14	11:48:38	0.575433	122.326	FALSE	2
2022-09-14	11:48:38	0.551107	122.877	FALSE	2
2022-09-14	11:48:38	0.534771	123.412	FALSE	2
2022-09-14	11:48:39	0.455433	123.868	FALSE	2
2022-09-14	11:48:39	0.497519	124.365	FALSE	2
2022-09-14	11:48:39	0.453244	124.818	FALSE	2
2022-09-14	11:48:39	0.461794	125.28	FALSE	2
2022-09-14	11:48:40	0.467952	125.748	FALSE	2
2022-09-14	11:48:40	0.471412	126.22	FALSE	2
2022-09-14	11:48:40	0.435331	126.655	FALSE	2
2022-09-14	11:48:40	0.467748	127.123	FALSE	2
2022-09-14	11:48:41	0.502303	127.625	FALSE	2
2022-09-14	11:48:41	0.45869	128.084	FALSE	2
2022-09-14	11:48:41	0.437774	128.521	FALSE	2
2022-09-14	11:48:41	0.563931	129.085	FALSE	2
2022-09-14	11:48:42	0.491158	129.576	FALSE	2
2022-09-14	11:48:42	0.499249	130.076	FALSE	2
2022-09-14	11:48:42	0.363372	130.439	FALSE	2
2022-09-14	11:48:43	-0.0848216	130.439	FALSE	2
2022-09-14	11:48:43	-0.354185	130.439	FALSE	2
2022-09-14	11:48:43	-0.50645	130.439	FALSE	2
2022-09-14	11:48:43	-0.546399	130.439	FALSE	2
2022-09-14	11:48:44	-0.743396	130.439	FALSE	2
2022-09-14	11:48:44	-0.651539	130.439	FALSE	2
2022-09-14	11:48:44	-0.712302	130.439	FALSE	2
2022-09-14	11:48:44	-0.588027	130.439	FALSE	2
2022-09-14	11:48:45	-0.642938	130.439	FALSE	2
2022-09-14	11:48:45	-0.601361	130.439	FALSE	2
2022-09-14	11:48:45	-0.630419	130.439	FALSE	2
2022-09-14	11:48:45	-0.524567	130.439	FALSE	2
2022-09-14	11:48:46	-0.556882	130.439	FALSE	2
2022-09-14	11:48:46	-0.535916	130.439	FALSE	2
2022-09-14	11:48:46	-0.605076	130.439	FALSE	2
2022-09-14	11:48:47	-0.51505	130.439	FALSE	2
2022-09-14	11:48:47	-0.507824	130.439	FALSE	2
2022-09-14	11:48:47	-0.621361	130.439	FALSE	2
2022-09-14	11:48:47	-0.599987	130.439	FALSE	2
2022-09-14	11:48:48	-0.588282	130.439	FALSE	2
2022-09-14	11:48:48	-0.453676	130.439	FALSE	2
2022-09-14	11:48:48	-0.561666	130.439	FALSE	2
2022-09-14	11:48:48	-0.610725	130.439	FALSE	2
2022-09-14	11:48:49	-0.676933	130.439	FALSE	2
2022-09-14	11:48:49	-0.657951	130.439	FALSE	2
2022-09-14	11:48:49	-0.549351	130.439	FALSE	2
2022-09-14	11:48:49	-0.612659	130.439	FALSE	2
2022-09-14	11:48:50	-0.604516	130.439	FALSE	2
2022-09-14	11:48:50	-0.686399	130.439	FALSE	2
2022-09-14	11:48:50	-0.636526	130.439	FALSE	2
2022-09-14	11:48:51	-0.513066	130.439	FALSE	2
2022-09-14	11:48:51	-0.527926	130.439	FALSE	2
2022-09-14	11:48:51	-0.575254	130.439	FALSE	2
2022-09-14	11:48:51	-0.553931	130.439	FALSE	2
2022-09-14	11:48:52	-0.555152	130.439	FALSE	2
2022-09-14	11:48:52	-0.556017	130.439	FALSE	2
2022-09-14	11:48:52	-0.574084	130.439	FALSE	2
2022-09-14	11:48:52	-0.575559	130.439	FALSE	2
2022-09-14	11:48:53	-0.572659	130.439	FALSE	2
2022-09-14	11:48:53	-0.571285	130.439	FALSE	2
2022-09-14	11:48:53	-0.569452	130.439	FALSE	2
2022-09-14	11:48:53	-0.566348	130.439	FALSE	2
2022-09-14	11:48:54	-0.562786	130.439	FALSE	2
2022-09-14	11:48:54	-0.556221	130.439	FALSE	2
2022-09-14	11:48:54	-0.552455	130.439	FALSE	2
2022-09-14	11:48:55	-0.554236	130.439	FALSE	2
2022-09-14	11:48:55	-0.550318	130.439	FALSE	2
2022-09-14	11:48:55	-0.547162	130.439	FALSE	2
2022-09-14	11:48:55	-0.551437	130.439	FALSE	2
2022-09-14	11:48:56	-0.549045	130.439	FALSE	2
2022-09-14	11:48:56	-0.544872	130.439	FALSE	2
2022-09-14	11:48:56	-0.545941	130.439	FALSE	2
2022-09-14	11:48:56	-0.541208	130.439	FALSE	2
2022-09-14	11:48:57	-0.544262	130.439	FALSE	2
2022-09-14	11:48:57	-0.551081	130.439	FALSE	2
2022-09-14	11:48:57	-0.581819	130.439	FALSE	2
2022-09-14	11:48:57	-0.626603	130.439	FALSE	2
2022-09-14	11:48:58	-0.62533	130.439	FALSE	2
2022-09-14	11:48:58	-0.688485	130.439	FALSE	2
2022-09-14	11:48:58	-0.626043	130.439	FALSE	2
2022-09-14	11:48:59	-0.650979	130.439	FALSE	2
2022-09-14	11:48:59	-0.848587	130.439	FALSE	2
2022-09-14	11:48:59	-0.6465	130.439	FALSE	2
2022-09-14	11:48:59	-0.685635	130.439	FALSE	2
2022-09-14	11:49:00	-0.665788	130.439	FALSE	2
2022-09-14	11:49:00	-0.658104	130.439	FALSE	2
2022-09-14	11:49:00	-0.607926	130.439	FALSE	2
2022-09-14	11:49:00	-0.570623	130.439	FALSE	2
2022-09-14	11:49:01	-0.642226	130.439	FALSE	2
2022-09-14	11:49:01	-0.562379	130.439	FALSE	2
2022-09-14	11:49:01	-0.633066	130.439	FALSE	2
2022-09-14	11:49:01	-0.518867	130.439	FALSE	2
2022-09-14	11:49:02	-0.60589	130.439	FALSE	2
2022-09-14	11:49:02	-0.573778	130.439	FALSE	2
2022-09-14	11:49:02	-0.638561	130.439	FALSE	2
2022-09-14	11:49:03	-0.741819	130.439	FALSE	2
2022-09-14	11:49:03	-0.549198	130.439	FALSE	2
2022-09-14	11:49:03	-0.445737	130.439	FALSE	2
2022-09-14	11:49:03	-0.356577	130.439	FALSE	2
2022-09-14	11:49:04	-0.310572	130.439	FALSE	2
2022-09-14	11:49:04	-0.167621	130.439	FALSE	2
2022-09-14	11:49:04	-0.0966791	130.439	FALSE	2
2022-09-14	11:49:04	0.0972648	130.536	FALSE	2
2022-09-14	11:49:05	0.150293	130.687	FALSE	2
2022-09-14	11:49:05	0.202303	130.889	FALSE	2
2022-09-14	11:49:05	0.1993	131.088	FALSE	2
2022-09-14	11:49:05	0.181539	131.27	FALSE	2
2022-09-14	11:49:06	0.122405	131.392	FALSE	2
2022-09-14	11:49:06	-0.00538142	131.392	FALSE	2
2022-09-14	11:49:06	-0.0691473	131.392	FALSE	2
2022-09-14	11:49:07	-0.159122	131.392	FALSE	2
2022-09-14	11:49:07	-0.445025	131.392	FALSE	2
2022-09-14	11:49:07	-0.687417	131.392	FALSE	2
2022-09-14	11:49:07	-0.789503	131.392	FALSE	2
2022-09-14	11:49:08	-0.646602	131.392	FALSE	2
2022-09-14	11:49:08	-0.826399	131.392	FALSE	2
2022-09-14	11:49:08	-0.723243	131.392	FALSE	2
2022-09-14	11:49:08	-0.732251	131.392	FALSE	2
2022-09-14	11:49:09	-0.63963	131.392	FALSE	2
2022-09-14	11:49:09	-0.665432	131.392	FALSE	2
2022-09-14	11:49:09	-0.518358	131.392	FALSE	2
2022-09-14	11:49:09	-0.557035	131.392	FALSE	2
2022-09-14	11:49:10	-0.590623	131.392	FALSE	2
2022-09-14	11:49:10	-0.471437	131.392	FALSE	2
2022-09-14	11:49:10	-0.527213	131.392	FALSE	2
2022-09-14	11:49:11	-0.505941	131.392	FALSE	2
2022-09-14	11:49:11	-0.561412	131.392	FALSE	2
2022-09-14	11:49:11	-0.400852	131.392	FALSE	2
2022-09-14	11:49:11	-0.440496	131.392	FALSE	2
2022-09-14	11:49:12	-0.211946	131.392	FALSE	2
2022-09-14	11:49:12	-0.297544	131.392	FALSE	2
2022-09-14	11:49:12	-0.247926	131.392	FALSE	2
2022-09-14	11:49:12	-0.103193	131.392	FALSE	2
2022-09-14	11:49:13	-0.0872135	131.392	FALSE	2
2022-09-14	11:49:13	-0.120852	131.392	FALSE	2
2022-09-14	11:49:13	-0.178664	131.392	FALSE	2
2022-09-14	11:49:13	-0.045585	131.392	FALSE	2
2022-09-14	11:49:14	-0.0977987	131.392	FALSE	2
2022-09-14	11:49:14	-0.0443636	131.392	FALSE	2
2022-09-14	11:49:14	-0.216425	131.392	FALSE	2
2022-09-14	11:49:15	-0.231743	131.392	FALSE	2
2022-09-14	11:49:15	-0.0512847	131.392	FALSE	2
2022-09-14	11:49:15	-0.127773	131.392	FALSE	2
2022-09-14	11:49:15	-0.17673	131.392	FALSE	2
2022-09-14	11:49:16	-0.324872	131.392	FALSE	2
2022-09-14	11:49:16	-0.261717	131.392	FALSE	2
2022-09-14	11:49:16	-0.268893	131.392	FALSE	2
2022-09-14	11:49:16	-0.315	131.392	FALSE	2
2022-09-14	11:49:17	-0.314033	131.392	FALSE	2
2022-09-14	11:49:17	-0.345737	131.392	FALSE	2
2022-09-14	11:49:17	-0.348944	131.392	FALSE	2
2022-09-14	11:49:17	-0.275305	131.392	FALSE	2
2022-09-14	11:49:18	-0.255712	131.392	FALSE	2
2022-09-14	11:49:18	-0.338766	131.392	FALSE	2
2022-09-14	11:49:18	-0.410827	131.392	FALSE	2
2022-09-14	11:49:19	-0.398664	131.392	FALSE	2
2022-09-14	11:49:19	-0.396323	131.392	FALSE	2
2022-09-14	11:49:19	-0.495661	131.392	FALSE	2
2022-09-14	11:49:19	-0.599427	131.392	FALSE	2
2022-09-14	11:49:20	-0.665076	131.392	FALSE	2
2022-09-14	11:49:20	-0.521157	131.392	FALSE	2
2022-09-14	11:49:20	-0.553829	131.392	FALSE	2
2022-09-14	11:49:20	-0.623142	131.392	FALSE	2
2022-09-14	11:49:21	-0.56645	131.392	FALSE	2
2022-09-14	11:49:21	-0.608435	131.392	FALSE	2
2022-09-14	11:49:21	-0.473829	131.392	FALSE	2
2022-09-14	11:49:21	-0.524109	131.392	FALSE	2
2022-09-14	11:49:22	-0.485839	131.392	FALSE	2
2022-09-14	11:49:22	-0.514999	131.392	FALSE	2
2022-09-14	11:49:22	-0.554287	131.392	FALSE	2
2022-09-14	11:49:23	-0.419936	131.392	FALSE	2
2022-09-14	11:49:23	-0.47271	131.392	FALSE	2
2022-09-14	11:49:23	-0.480903	131.392	FALSE	2
2022-09-14	11:49:23	-0.566399	131.392	FALSE	2
2022-09-14	11:49:24	-0.437799	131.392	FALSE	2
2022-09-14	11:49:24	-0.458816	131.392	FALSE	2
2022-09-14	11:49:24	-0.539885	131.392	FALSE	2
2022-09-14	11:49:24	-0.501615	131.392	FALSE	2
2022-09-14	11:49:25	-0.522022	131.392	FALSE	2
2022-09-14	11:49:25	-0.308079	131.392	FALSE	2
2022-09-14	11:49:25	-0.359529	131.392	FALSE	2
2022-09-14	11:49:25	-0.437239	131.392	FALSE	2
2022-09-14	11:49:26	-0.430419	131.392	FALSE	2
2022-09-14	11:49:26	-0.512964	131.392	FALSE	2
2022-09-14	11:49:26	-0.281921	131.392	FALSE	2
2022-09-14	11:49:27	-0.272353	131.392	FALSE	2
2022-09-14	11:49:27	-0.260496	131.392	FALSE	2
2022-09-14	11:49:27	-0.315916	131.392	FALSE	2
2022-09-14	11:49:27	-0.185992	131.392	FALSE	2
2022-09-14	11:49:28	-0.109707	131.392	FALSE	2
2022-09-14	11:49:28	-0.234745	131.392	FALSE	2
2022-09-14	11:49:28	-0.0972389	131.392	FALSE	2
2022-09-14	11:49:28	0.283524	131.676	FALSE	2
2022-09-14	11:49:29	0.336908	132.013	FALSE	2
2022-09-14	11:49:29	0.207443	132.22	FALSE	2
2022-09-14	11:49:29	0.130802	132.351	FALSE	2
2022-09-14	11:49:29	0.127138	132.478	FALSE	2
2022-09-14	11:49:30	0.162659	132.641	FALSE	2
2022-09-14	11:49:30	-0.0164756	132.641	FALSE	2
2022-09-14	11:49:30	0.0210308	132.662	FALSE	2
2022-09-14	11:49:31	0.0530918	132.715	FALSE	2
2022-09-14	11:49:31	0.0589952	132.774	FALSE	2
2022-09-14	11:49:31	-0.153626	132.774	FALSE	2
2022-09-14	11:49:31	-0.0476715	132.774	FALSE	2
2022-09-14	11:49:32	-0.0451778	132.774	FALSE	2
2022-09-14	11:49:32	0.0927865	132.867	FALSE	2
2022-09-14	11:49:32	0.179708	133.046	FALSE	2
2022-09-14	11:49:32	0.128512	133.175	FALSE	2
2022-09-14	11:49:33	0.239351	133.414	FALSE	2
2022-09-14	11:49:33	-0.0854832	133.414	FALSE	2
2022-09-14	11:49:33	0.163881	133.578	FALSE	2
2022-09-14	11:49:33	0.139453	133.717	FALSE	2
2022-09-14	11:49:34	0.35701	134.074	FALSE	2
2022-09-14	11:49:34	0.00917326	134.084	FALSE	2
2022-09-14	11:49:34	0.321183	134.405	FALSE	2
2022-09-14	11:49:35	0.32042	134.725	FALSE	2
2022-09-14	11:49:35	0.280674	135.006	FALSE	2
2022-09-14	11:49:35	0.233295	135.239	FALSE	2
2022-09-14	11:49:35	0.207392	135.447	FALSE	2
2022-09-14	11:49:36	0.299351	135.746	FALSE	2
2022-09-14	11:49:36	0.268003	136.014	FALSE	2
2022-09-14	11:49:36	0.431311	136.445	FALSE	2
2022-09-14	11:49:36	0.209275	136.655	FALSE	2
2022-09-14	11:49:37	0.392023	137.047	FALSE	2
2022-09-14	11:49:37	0.33813	137.385	FALSE	2
2022-09-14	11:49:37	0.340725	137.725	FALSE	2
2022-09-14	11:49:37	0.372939	138.098	FALSE	2
2022-09-14	11:49:38	0.264338	138.363	FALSE	2
2022-09-14	11:49:38	0.403779	138.766	FALSE	2
2022-09-14	11:49:38	0.299046	139.066	FALSE	2
2022-09-14	11:49:39	0.461794	139.527	FALSE	2
2022-09-14	11:49:39	0.303066	139.83	FALSE	2
2022-09-14	11:49:39	0.372227	140.203	FALSE	2
2022-09-14	11:49:39	0.310395	140.513	FALSE	2
2022-09-14	11:49:40	0.340776	140.854	FALSE	2
2022-09-14	11:49:40	0.383524	141.237	FALSE	2
2022-09-14	11:49:40	0.278384	141.516	FALSE	2
2022-09-14	11:49:40	0.473499	141.989	FALSE	2
2022-09-14	11:49:41	0.339758	142.329	FALSE	2
2022-09-14	11:49:41	0.422506	142.751	FALSE	2
2022-09-14	11:49:41	0.339606	143.091	FALSE	2
2022-09-14	11:49:41	0.348919	143.44	FALSE	2
2022-09-14	11:49:42	0.425764	143.866	FALSE	2
2022-09-14	11:49:42	0.331565	144.197	FALSE	2
2022-09-14	11:49:42	0.467341	144.665	FALSE	2
2022-09-14	11:49:43	0.350496	145.015	FALSE	2
2022-09-14	11:49:43	0.373244	145.388	FALSE	2
2022-09-14	11:49:43	0.349275	145.738	FALSE	2
2022-09-14	11:49:43	0.337316	146.075	FALSE	2
2022-09-14	11:49:44	0.512735	146.588	FALSE	2
2022-09-14	11:49:44	0.323575	146.911	FALSE	2
2022-09-14	11:49:44	0.386323	147.298	FALSE	2
2022-09-14	11:49:44	0.365865	147.663	FALSE	2
2022-09-14	11:49:45	0.323677	147.987	FALSE	2
2022-09-14	11:49:45	0.454008	148.441	FALSE	2
2022-09-14	11:49:45	0.316858	148.758	FALSE	2
2022-09-14	11:49:45	0.439504	149.198	FALSE	2
2022-09-14	11:49:46	0.382099	149.58	FALSE	2
2022-09-14	11:49:46	0.41869	149.998	FALSE	2
2022-09-14	11:49:46	0.407952	150.406	FALSE	2
2022-09-14	11:49:47	0.311565	150.718	FALSE	2
2022-09-14	11:49:47	0.480522	151.198	FALSE	2
2022-09-14	11:49:47	0.358639	151.557	FALSE	2
2022-09-14	11:49:47	0.412176	151.969	FALSE	2
2022-09-14	11:49:48	0.400216	152.369	FALSE	2
2022-09-14	11:49:48	0.297824	152.667	FALSE	2
2022-09-14	11:49:48	0.38154	153.049	FALSE	2
2022-09-14	11:49:48	0.312277	153.361	FALSE	2
2022-09-14	11:49:49	0.352634	153.714	FALSE	2
2022-09-14	11:49:49	0.454415	154.168	FALSE	2
2022-09-14	11:49:49	0.346883	154.515	FALSE	2
2022-09-14	11:49:49	0.384593	154.9	FALSE	2
2022-09-14	11:49:50	0.282456	155.182	FALSE	2
2022-09-14	11:49:50	0.309886	155.492	FALSE	2
2022-09-14	11:49:50	0.520064	156.012	FALSE	2
2022-09-14	11:49:51	0.37986	156.392	FALSE	2
2022-09-14	11:49:51	0.2907	156.683	FALSE	2
2022-09-14	11:49:51	0.37411	157.057	FALSE	2
2022-09-14	11:49:51	0.210242	157.267	FALSE	2
2022-09-14	11:49:52	0.308206	157.575	FALSE	2
2022-09-14	11:49:52	0.312023	157.887	FALSE	2
2022-09-14	11:49:52	0.23528	158.122	FALSE	2
2022-09-14	11:49:52	0.435026	158.557	FALSE	2
2022-09-14	11:49:53	0.312227	158.87	FALSE	2
2022-09-14	11:49:53	0.279504	159.149	FALSE	2
2022-09-14	11:49:53	0.445458	159.595	FALSE	2
2022-09-14	11:49:53	0.295789	159.89	FALSE	2
2022-09-14	11:49:54	0.32673	160.217	FALSE	2
2022-09-14	11:49:54	0.274669	160.492	FALSE	2
2022-09-14	11:49:54	0.240216	160.732	FALSE	2
2022-09-14	11:49:55	0.429529	161.162	FALSE	2
2022-09-14	11:49:55	0.295992	161.458	FALSE	2
2022-09-14	11:49:55	0.245509	161.703	FALSE	2
2022-09-14	11:49:55	0.423473	162.126	FALSE	2
2022-09-14	11:49:56	0.325865	162.452	FALSE	2
2022-09-14	11:49:56	0.378537	162.831	FALSE	2
2022-09-14	11:49:56	0.357977	163.189	FALSE	2
2022-09-14	11:49:56	0.446171	163.635	FALSE	2
2022-09-14	11:49:57	0.903219	164.538	FALSE	2
2022-09-14	11:49:57	0.945967	165.484	FALSE	2
2022-09-14	11:49:57	0.835789	166.32	FALSE	2
2022-09-14	11:49:57	0.516043	166.836	FALSE	2
2022-09-14	11:49:58	0.454415	167.29	FALSE	2
2022-09-14	11:49:58	0.417926	167.708	FALSE	2
2022-09-14	11:49:58	0.458435	168.167	FALSE	2
2022-09-14	11:49:59	0.432379	168.599	FALSE	2
2022-09-14	11:49:59	0.416247	169.015	FALSE	2
2022-09-14	11:49:59	0.424033	169.44	FALSE	2
2022-09-14	11:49:59	0.45986	169.899	FALSE	2
2022-09-14	11:50:00	0.37187	170.271	FALSE	2
2022-09-14	11:50:00	0.401743	170.673	FALSE	2
2022-09-14	11:50:00	0.378741	171.052	FALSE	2
2022-09-14	11:50:00	0.400878	171.453	FALSE	2
2022-09-14	11:50:01	0.409428	171.862	FALSE	2
2022-09-14	11:50:01	0.369529	172.232	FALSE	2
2022-09-14	11:50:01	0.38042	172.612	FALSE	2
2022-09-14	11:50:01	0.455483	173.067	FALSE	2
2022-09-14	11:50:02	0.359249	173.427	FALSE	2
2022-09-14	11:50:02	0.376349	173.803	FALSE	2
2022-09-14	11:50:02	0.347494	174.151	FALSE	2
2022-09-14	11:50:03	0.361489	174.512	FALSE	2
2022-09-14	11:50:03	0.412532	174.925	FALSE	2
2022-09-14	11:50:03	0.376043	175.301	FALSE	2
2022-09-14	11:50:03	0.413041	175.714	FALSE	2
2022-09-14	11:50:04	0.441896	176.156	FALSE	2
2022-09-14	11:50:04	0.570038	176.726	FALSE	2
2022-09-14	11:50:04	0.436349	177.162	FALSE	2
2022-09-14	11:50:04	0.467952	177.63	FALSE	2
2022-09-14	11:50:05	0.506629	178.137	FALSE	2
2022-09-14	11:50:05	0.415076	178.552	FALSE	2
2022-09-14	11:50:05	0.512125	179.064	FALSE	2
2022-09-14	11:50:05	0.558486	179.622	FALSE	2
2022-09-14	11:50:06	0.595178	180.217	FALSE	2
2022-09-14	11:50:06	0.602659	180.82	FALSE	2
2022-09-14	11:50:06	0.599657	181.42	FALSE	2
2022-09-14	11:50:07	0.679148	182.099	FALSE	2
2022-09-14	11:50:07	0.670496	182.769	FALSE	2
2022-09-14	11:50:07	0.6536	183.423	FALSE	2
2022-09-14	11:50:07	0.632277	184.055	FALSE	2
2022-09-14	11:50:08	0.652277	184.707	FALSE	2
2022-09-14	11:50:08	0.697163	185.405	FALSE	2
2022-09-14	11:50:08	0.708206	186.113	FALSE	2
2022-09-14	11:50:08	1.07961	187.192	FALSE	2
2022-09-14	11:50:09	0.358842	187.551	FALSE	2
2022-09-14	11:50:09	0.436145	187.987	FALSE	2
2022-09-14	11:50:09	0.414873	188.402	FALSE	2
2022-09-14	11:50:09	0.450395	188.853	FALSE	2
2022-09-14	11:50:10	0.448613	189.301	FALSE	2
2022-09-14	11:50:10	0.425611	189.727	FALSE	2
2022-09-14	11:50:10	0.427087	190.154	FALSE	2
2022-09-14	11:50:11	0.381489	190.536	FALSE	2
2022-09-14	11:50:11	0.381998	190.918	FALSE	2
2022-09-14	11:50:11	0.396959	191.314	FALSE	2
2022-09-14	11:50:11	0.415738	191.73	FALSE	2
2022-09-14	11:50:12	0.408868	192.139	FALSE	2
2022-09-14	11:50:12	0.405356	192.544	FALSE	2
2022-09-14	11:50:12	0.478486	193.023	FALSE	2
2022-09-14	11:50:12	0.57014	193.593	FALSE	2
2022-09-14	11:50:13	0.663371	194.256	FALSE	2
2022-09-14	11:50:13	0.535178	194.792	FALSE	2
2022-09-14	11:50:13	0.581438	195.373	FALSE	2
2022-09-14	11:50:13	1.01411	196.387	FALSE	2
2022-09-14	11:50:14	0.46897	196.856	FALSE	2
2022-09-14	11:50:14	0.610903	197.467	FALSE	2
2022-09-14	11:50:14	0.501336	197.968	FALSE	2
2022-09-14	11:50:15	0.449529	198.418	FALSE	2
2022-09-14	11:50:15	0.428512	198.846	FALSE	2
2022-09-14	11:50:15	0.480064	199.326	FALSE	2
2022-09-14	11:50:15	0.440216	199.767	FALSE	2
2022-09-14	11:50:16	0.452023	200.219	FALSE	2
2022-09-14	11:50:16	0.504695	200.723	FALSE	2
2022-09-14	11:50:16	0.566171	201.29	FALSE	2
2022-09-14	11:50:16	0.784847	202.074	FALSE	2
2022-09-14	11:50:17	1.47854	203.553	FALSE	2
2022-09-14	11:50:17	1.76617	205.319	FALSE	2
2022-09-14	11:50:17	2.31223	207.631	FALSE	2
2022-09-14	11:50:17	1.60958	209.241	FALSE	2
2022-09-14	11:50:18	1.17029	210.411	FALSE	2
2022-09-14	11:50:18	1.28678	211.698	FALSE	2
2022-09-14	11:50:18	-1.25871	211.698	FALSE	2
2022-09-14	11:50:19	0.689631	212.388	FALSE	2
2022-09-14	11:50:19	0.775534	213.163	FALSE	2
2022-09-14	11:50:19	1.06912	214.232	FALSE	2
2022-09-14	11:50:19	1.31375	215.546	FALSE	2
2022-09-14	11:50:20	1.41961	216.966	FALSE	2
2022-09-14	11:50:20	1.32098	218.287	FALSE	2
2022-09-14	11:50:20	1.05085	219.338	FALSE	2
2022-09-14	11:50:20	-1.24411	219.338	FALSE	2
2022-09-14	11:50:21	0.83874	220.176	FALSE	2
2022-09-14	11:50:21	0.772125	220.948	FALSE	2
2022-09-14	11:50:21	0.739962	221.688	FALSE	2
2022-09-14	11:50:21	0.831463	222.52	FALSE	2
2022-09-14	11:50:22	0.834415	223.354	FALSE	2
2022-09-14	11:50:22	0.749987	224.104	FALSE	2
2022-09-14	11:50:22	0.663015	224.767	FALSE	2
2022-09-14	11:50:23	1.05625	225.823	FALSE	2
2022-09-14	11:50:23	1.24108	227.065	FALSE	2
2022-09-14	11:50:23	0.922405	227.987	FALSE	2
2022-09-14	11:50:23	0.764338	228.751	FALSE	2
2022-09-14	11:50:24	0.921234	229.673	FALSE	2
2022-09-14	11:50:24	0.92673	230.599	FALSE	2
2022-09-14	11:50:24	1.11095	231.71	FALSE	2
2022-09-14	11:50:24	1.11279	232.823	FALSE	2
2022-09-14	11:50:25	1.5649	234.388	FALSE	2
2022-09-14	11:50:25	2.80439	237.192	FALSE	2
2022-09-14	11:50:25	2.3996	239.592	FALSE	2
2022-09-14	11:50:25	2.7677	242.36	FALSE	2
2022-09-14	11:50:26	0.910038	243.27	FALSE	2
2022-09-14	11:50:26	0.210853	243.48	FALSE	2
2022-09-14	11:50:26	0.440369	243.921	FALSE	2
2022-09-14	11:50:27	0.363473	244.284	FALSE	2
2022-09-14	11:50:27	0.448053	244.732	FALSE	2
2022-09-14	11:50:27	0.136603	244.869	FALSE	2
2022-09-14	11:50:27	0.363779	245.233	FALSE	2
2022-09-14	11:50:28	0.348664	245.581	FALSE	2
2022-09-14	11:50:28	0.297112	245.879	FALSE	2
2022-09-14	11:50:28	0.104084	245.983	FALSE	2
2022-09-14	11:50:28	0.438791	246.421	FALSE	2
2022-09-14	11:50:29	0.466629	246.888	FALSE	2
2022-09-14	11:50:29	0.602608	247.491	FALSE	2
2022-09-14	11:50:29	0.455738	247.946	FALSE	2
2022-09-14	11:50:29	0.42612	248.372	FALSE	2
2022-09-14	11:50:30	0.382252	248.755	FALSE	2
2022-09-14	11:50:30	0.351158	249.106	FALSE	2
2022-09-14	11:50:30	0.370496	249.476	FALSE	2
2022-09-14	11:50:31	0.30215	249.779	FALSE	2
2022-09-14	11:50:31	0.500471	250.279	FALSE	2
2022-09-14	11:50:31	0.260573	250.54	FALSE	2
2022-09-14	11:50:31	0.397316	250.937	FALSE	2
2022-09-14	11:50:32	0.245	251.182	FALSE	2
2022-09-14	11:50:32	0.410344	251.592	FALSE	2
2022-09-14	11:50:32	0.451056	252.043	FALSE	2
2022-09-14	11:50:32	0.508817	252.552	FALSE	2
2022-09-14	11:50:33	0.340064	252.892	FALSE	2
2022-09-14	11:50:33	0.402812	253.295	FALSE	2
2022-09-14	11:50:33	0.288155	253.583	FALSE	2
2022-09-14	11:50:33	0.319148	253.902	FALSE	2
2022-09-14	11:50:34	0.311107	254.213	FALSE	2
2022-09-14	11:50:34	0.17869	254.392	FALSE	2
2022-09-14	11:50:34	0.274873	254.667	FALSE	2
2022-09-14	11:50:35	-0.00955446	254.667	FALSE	2
2022-09-14	11:50:35	-0.0211066	254.667	FALSE	2
2022-09-14	11:50:35	-0.00619567	254.667	FALSE	2
2022-09-14	11:50:35	0.0824048	254.749	FALSE	2
2022-09-14	11:50:36	0.280471	255.03	FALSE	2
2022-09-14	11:50:36	0.526832	255.557	FALSE	2
2022-09-14	11:50:36	0.496909	256.054	FALSE	2
2022-09-14	11:50:36	0.29355	256.347	FALSE	2
2022-09-14	11:50:37	0.206272	256.553	FALSE	2
2022-09-14	11:50:37	0.0113616	256.565	FALSE	2
2022-09-14	11:50:37	-0.0901651	256.565	FALSE	2
2022-09-14	11:50:37	-0.181208	256.565	FALSE	2
2022-09-14	11:50:38	-0.430063	256.565	FALSE	2
2022-09-14	11:50:38	-0.375356	256.565	FALSE	2
2022-09-14	11:50:38	-0.370267	256.565	FALSE	2
2022-09-14	11:50:39	-0.391895	256.565	FALSE	2
2022-09-14	11:50:39	-0.36701	256.565	FALSE	2
2022-09-14	11:50:39	-0.320852	256.565	FALSE	2
2022-09-14	11:50:39	-0.21042	256.565	FALSE	2
2022-09-14	11:50:40	-0.210725	256.565	FALSE	2
2022-09-14	11:50:40	-0.132964	256.565	FALSE	2
2022-09-14	11:50:40	-0.162989	256.565	FALSE	2
2022-09-14	11:50:40	-0.26014	256.565	FALSE	2
2022-09-14	11:50:41	-0.252455	256.565	FALSE	2
2022-09-14	11:50:41	-0.236577	256.565	FALSE	2
2022-09-14	11:50:41	-0.186043	256.565	FALSE	2
2022-09-14	11:50:41	-0.199122	256.565	FALSE	2
2022-09-14	11:50:42	-0.23617	256.565	FALSE	2
2022-09-14	11:50:42	-0.235712	256.565	FALSE	2
2022-09-14	11:50:42	0.115535	256.68	FALSE	2
2022-09-14	11:50:43	0.128054	256.808	FALSE	2
2022-09-14	11:50:43	0.391819	257.2	FALSE	2
2022-09-14	11:50:43	0.217875	257.418	FALSE	2
2022-09-14	11:50:43	0.155738	257.574	FALSE	2
2022-09-14	11:50:44	0.375534	257.949	FALSE	2
2022-09-14	11:50:44	0.229478	258.179	FALSE	2
2022-09-14	11:50:44	0.431565	258.61	FALSE	2
2022-09-14	11:50:44	0.187545	258.798	FALSE	2
2022-09-14	11:50:45	0.285255	259.083	FALSE	2
2022-09-14	11:50:45	0.335433	259.419	FALSE	2
2022-09-14	11:50:45	0.253804	259.672	FALSE	2
2022-09-14	11:50:45	0.400471	260.073	FALSE	2
2022-09-14	11:50:46	0.189377	260.262	FALSE	2
2022-09-14	11:50:46	0.269224	260.531	FALSE	2
2022-09-14	11:50:46	0.339555	260.871	FALSE	2
2022-09-14	11:50:47	0.22897	261.1	FALSE	2
2022-09-14	11:50:47	0.273143	261.373	FALSE	2
2022-09-14	11:50:47	0.155687	261.529	FALSE	2
2022-09-14	11:50:47	0.0998094	261.629	FALSE	2
2022-09-14	11:50:48	0.278435	261.907	FALSE	2
2022-09-14	11:50:48	0.202354	262.109	FALSE	2
2022-09-14	11:50:48	0.142812	262.252	FALSE	2
2022-09-14	11:50:48	0.0132445	262.265	FALSE	2
2022-09-14	11:50:49	-0.00700993	262.265	FALSE	2
2022-09-14	11:50:49	0.116909	262.382	FALSE	2
2022-09-14	11:50:49	0.103372	262.486	FALSE	2
2022-09-14	11:50:49	0.0814379	262.567	FALSE	2
2022-09-14	11:50:50	0.204746	262.772	FALSE	2
2022-09-14	11:50:50	0.180573	262.953	FALSE	2
2022-09-14	11:50:50	0.152837	263.105	FALSE	2
2022-09-14	11:50:51	0.232837	263.338	FALSE	2
2022-09-14	11:50:51	0.175687	263.514	FALSE	2
2022-09-14	11:50:51	0.31131	263.825	FALSE	2
2022-09-14	11:50:51	0.110395	263.936	FALSE	2
2022-09-14	11:50:52	0.277723	264.213	FALSE	2
2022-09-14	11:50:52	0.228104	264.441	FALSE	2
2022-09-14	11:50:52	0.266578	264.708	FALSE	2
2022-09-14	11:50:52	0.364797	265.073	FALSE	2
2022-09-14	11:50:53	0.146934	265.22	FALSE	2
2022-09-14	11:50:53	0.267596	265.487	FALSE	2
2022-09-14	11:50:53	0.199351	265.687	FALSE	2
2022-09-14	11:50:53	0.213397	265.9	FALSE	2
2022-09-14	11:50:54	0.329377	266.229	FALSE	2
2022-09-14	11:50:54	0.0768577	266.306	FALSE	2
2022-09-14	11:50:54	0.213143	266.519	FALSE	2
2022-09-14	11:50:55	0.295789	266.815	FALSE	2
2022-09-14	11:50:55	0.364135	267.179	FALSE	2
2022-09-14	11:50:55	0.761997	267.941	FALSE	2
2022-09-14	11:50:55	0.338028	268.279	FALSE	2
2022-09-14	11:50:56	0.252583	268.532	FALSE	2
2022-09-14	11:50:56	0.286018	268.818	FALSE	2
2022-09-14	11:50:56	0.308969	269.127	FALSE	2
2022-09-14	11:50:56	0.372685	269.5	FALSE	2
2022-09-14	11:50:57	0.220674	269.72	FALSE	2
2022-09-14	11:50:57	0.298232	270.019	FALSE	2
2022-09-14	11:50:57	0.284491	270.303	FALSE	2
2022-09-14	11:50:57	0.279402	270.582	FALSE	2
2022-09-14	11:50:58	0.311514	270.894	FALSE	2
2022-09-14	11:50:58	0.337163	271.231	FALSE	2
2022-09-14	11:50:58	0.313448	271.545	FALSE	2
2022-09-14	11:50:59	0.288308	271.833	FALSE	2
2022-09-14	11:50:59	0.331005	272.164	FALSE	2
2022-09-14	11:50:59	0.497112	272.661	FALSE	2
2022-09-14	11:50:59	1.03223	273.693	FALSE	2
2022-09-14	11:51:00	2.2137	275.907	FALSE	2
2022-09-14	11:51:00	2.1767	278.084	FALSE	2
2022-09-14	11:51:00	2.36866	280.452	FALSE	2
2022-09-14	11:51:00	2.95843	283.411	FALSE	2
2022-09-14	11:51:01	3.53146	286.942	1	3
2022-09-14	11:51:01	3.86429	290.806	1	4
2022-09-14	11:51:01	2.59594	293.402	FALSE	4
2022-09-14	11:51:01	2.60403	296.006	FALSE	4
2022-09-14	11:51:02	2.40413	298.411	FALSE	4
2022-09-14	11:51:02	2.09889	300.509	FALSE	4
2022-09-14	11:51:02	2.55793	303.067	FALSE	4
2022-09-14	11:51:03	3.88062	306.948	1	5
2022-09-14	11:51:03	4.45284	311.401	1	6
2022-09-14	11:51:03	4.01904	315.42	1	7
2022-09-14	11:51:03	3.85497	319.275	1	8
2022-09-14	11:51:04	4.35116	323.626	1	9
2022-09-14	11:51:04	4.92398	328.55	1	10
2022-09-14	11:51:04	5.47227	334.022	1	11
2022-09-14	11:51:04	6.10464	340.127	1	12
2022-09-14	11:51:05	6.21355	346.34	1	13
2022-09-14	11:51:05	5.7792	352.12	1	14
2022-09-14	11:51:05	6.04378	358.163	1	15
2022-09-14	11:51:05	6.27965	364.443	1	16
2022-09-14	11:51:06	4.96103	369.404	1	17
2022-09-14	11:51:06	3.49238	372.897	1	18
2022-09-14	11:51:06	3.1592	376.056	1	19
2022-09-14	11:51:07	2.52011	378.576	FALSE	19
2022-09-14	11:51:07	0.716552	379.292	FALSE	19
2022-09-14	11:51:07	0.740267	380.033	FALSE	19
2022-09-14	11:51:07	0.478893	380.512	FALSE	19
2022-09-14	11:51:08	0.924898	381.436	FALSE	19
2022-09-14	11:51:08	1.16887	382.605	FALSE	19
2022-09-14	11:51:08	1.13156	383.737	FALSE	19
2022-09-14	11:51:08	1.89513	385.632	FALSE	19
2022-09-14	11:51:09	2.19192	387.824	FALSE	19
2022-09-14	11:51:09	2.35223	390.176	FALSE	19
2022-09-14	11:51:09	2.28088	392.457	FALSE	19
2022-09-14	11:51:09	2.22128	394.678	FALSE	19
2022-09-14	11:51:10	2.35335	397.032	FALSE	19
2022-09-14	11:51:10	2.52642	399.558	FALSE	19
2022-09-14	11:51:10	2.55879	402.117	FALSE	19
2022-09-14	11:51:11	2.72581	404.843	FALSE	19
2022-09-14	11:51:11	1.43365	406.276	FALSE	19
2022-09-14	11:51:11	0.728512	407.005	FALSE	19
2022-09-14	11:51:11	0.979504	407.984	FALSE	19
2022-09-14	11:51:12	2.46098	410.445	FALSE	19
2022-09-14	11:51:12	3.04093	413.486	1	20
2022-09-14	11:51:12	3.15126	416.637	1	21
2022-09-14	11:51:12	3.63355	420.271	1	22
2022-09-14	11:51:13	3.5565	423.828	1	23
2022-09-14	11:51:13	4.03228	427.86	1	24
2022-09-14	11:51:13	3.77161	431.631	1	25
2022-09-14	11:51:13	4.94983	436.581	1	26
2022-09-14	11:51:14	6.34968	442.931	1	27
2022-09-14	11:51:14	6.56169	449.493	1	28
2022-09-14	11:51:14	6.5197	456.012	1	29
2022-09-14	11:51:15	6.2224	462.235	1	30
2022-09-14	11:51:15	5.92245	468.157	1	31
2022-09-14	11:51:15	6.12413	474.281	1	32
2022-09-14	11:51:15	6.07741	480.359	1	33
2022-09-14	11:51:16	5.62357	485.982	1	34
2022-09-14	11:51:16	5.94474	491.927	1	35
2022-09-14	11:51:16	5.84413	497.771	1	36
2022-09-14	11:51:16	5.83141	503.603	1	37
2022-09-14	11:51:17	5.74215	509.345	1	38
2022-09-14	11:51:17	5.66042	515.005	1	39
2022-09-14	11:51:17	5.02184	520.027	1	40
2022-09-14	11:51:17	4.78322	524.81	1	41
2022-09-14	11:51:18	4.69966	529.51	1	42
2022-09-14	11:51:18	4.26276	533.773	1	43
2022-09-14	11:51:18	3.83558	537.608	1	44
2022-09-14	11:51:19	3.73721	541.345	1	45
2022-09-14	11:51:19	3.38647	544.732	1	46
2022-09-14	11:51:19	3.3021	548.034	1	47
2022-09-14	11:51:19	2.75284	550.787	FALSE	47
2022-09-14	11:51:20	2.1767	552.964	FALSE	47
2022-09-14	11:51:20	1.93701	554.901	FALSE	47
2022-09-14	11:51:20	1.93131	556.832	FALSE	47
2022-09-14	11:51:20	2.39447	559.226	FALSE	47
2022-09-14	11:51:21	2.31065	561.537	FALSE	47
2022-09-14	11:51:21	2.99161	564.529	FALSE	47
2022-09-14	11:51:21	3.33981	567.868	1	48
2022-09-14	11:51:21	3.25263	571.121	1	49
2022-09-14	11:51:22	3.50301	574.624	1	50
2022-09-14	11:51:22	3.31441	577.938	1	51
2022-09-14	11:51:22	2.90724	580.846	FALSE	51
2022-09-14	11:51:23	3.21049	584.056	1	52
2022-09-14	11:51:23	3.01482	587.071	1	53
2022-09-14	11:51:23	2.84245	589.913	FALSE	53
2022-09-14	11:51:23	1.7249	591.638	FALSE	53
2022-09-14	11:51:24	1.72444	593.363	FALSE	53
2022-09-14	11:51:24	1.84734	595.21	FALSE	53
2022-09-14	11:51:24	2.09279	597.303	FALSE	53
2022-09-14	11:51:24	0.868002	598.171	FALSE	53
2022-09-14	11:51:25	0.737417	598.908	FALSE	53
2022-09-14	11:51:25	0.72958	599.638	FALSE	53
2022-09-14	11:51:25	0.742964	600.381	FALSE	53
2022-09-14	11:51:25	0.737468	601.118	FALSE	53
2022-09-14	11:51:26	0.736654	601.855	FALSE	53
2022-09-14	11:51:26	0.734873	602.59	FALSE	53
2022-09-14	11:51:26	0.72841	603.318	FALSE	53
2022-09-14	11:51:27	0.736756	604.055	FALSE	53
2022-09-14	11:51:27	0.73355	604.789	FALSE	53
2022-09-14	11:51:27	0.731616	605.52	FALSE	53
2022-09-14	11:51:27	0.737315	606.258	FALSE	53
2022-09-14	11:51:28	0.738893	606.996	FALSE	53
2022-09-14	11:51:28	0.733957	607.73	FALSE	53
2022-09-14	11:51:28	0.729173	608.46	FALSE	53
2022-09-14	11:51:28	0.738791	609.198	FALSE	53
2022-09-14	11:51:29	0.730191	609.929	FALSE	53
2022-09-14	11:51:29	0.733193	610.662	FALSE	53
2022-09-14	11:51:29	0.733855	611.396	FALSE	53
2022-09-14	11:51:29	0.74042	612.136	FALSE	53
2022-09-14	11:51:30	0.731158	612.867	FALSE	53
2022-09-14	11:51:30	0.732074	613.599	FALSE	53
2022-09-14	11:51:30	0.735687	614.335	FALSE	53
2022-09-14	11:51:31	0.72841	615.063	FALSE	53
2022-09-14	11:51:31	0.73416	615.797	FALSE	53
2022-09-14	11:51:31	0.735992	616.533	FALSE	53
2022-09-14	11:51:31	0.735585	617.269	FALSE	53
2022-09-14	11:51:32	0.732532	618.002	FALSE	53
2022-09-14	11:51:32	0.738231	618.74	FALSE	53
2022-09-14	11:51:32	0.732583	619.472	FALSE	53
2022-09-14	11:51:32	0.743219	620.216	FALSE	53
2022-09-14	11:51:33	0.728817	620.944	FALSE	53
2022-09-14	11:51:33	0.737112	621.682	FALSE	53
2022-09-14	11:51:33	0.731768	622.413	FALSE	53
2022-09-14	11:51:33	0.735534	623.149	FALSE	53
2022-09-14	11:51:34	0.733346	623.882	FALSE	53
2022-09-14	11:51:34	0.735585	624.618	FALSE	53
2022-09-14	11:51:34	0.740369	625.358	FALSE	53
2022-09-14	11:51:35	0.739147	626.097	FALSE	53
2022-09-14	11:51:35	0.740267	626.838	FALSE	53
2022-09-14	11:51:35	0.728054	627.566	FALSE	53
2022-09-14	11:51:35	0.731819	628.297	FALSE	53
2022-09-14	11:51:36	0.732328	629.03	FALSE	53
2022-09-14	11:51:36	0.728919	629.759	FALSE	53
2022-09-14	11:51:36	0.737875	630.497	FALSE	53
2022-09-14	11:51:36	0.728613	631.225	FALSE	53
2022-09-14	11:51:37	0.732074	631.957	FALSE	53
2022-09-14	11:51:37	0.739147	632.696	FALSE	53
2022-09-14	11:51:37	0.734873	633.431	FALSE	53
2022-09-14	11:51:37	0.732074	634.163	FALSE	53
2022-09-14	11:51:38	0.728257	634.892	FALSE	53
2022-09-14	11:51:38	0.738588	635.63	FALSE	53
2022-09-14	11:51:38	0.738486	636.369	FALSE	53
2022-09-14	11:51:38	0.728206	637.097	FALSE	53
2022-09-14	11:51:39	0.729377	637.826	FALSE	53
2022-09-14	11:51:39	0.733448	638.56	FALSE	53
2022-09-14	11:51:39	0.735382	639.295	FALSE	53
2022-09-14	11:51:40	0.738282	640.033	FALSE	53
2022-09-14	11:51:40	0.739707	640.773	FALSE	53
2022-09-14	11:51:40	0.73701	641.51	FALSE	53
2022-09-14	11:51:40	0.737519	642.248	FALSE	53
2022-09-14	11:51:41	0.733092	642.981	FALSE	53
2022-09-14	11:51:41	0.734873	643.716	FALSE	53
2022-09-14	11:51:41	0.733346	644.449	FALSE	53
2022-09-14	11:51:41	0.738028	645.187	FALSE	53
2022-09-14	11:51:42	0.732074	645.919	FALSE	53
2022-09-14	11:51:42	0.732837	646.652	FALSE	53
2022-09-14	11:51:42	0.737773	647.39	FALSE	53
2022-09-14	11:51:42	0.738689	648.128	FALSE	53
2022-09-14	11:51:43	0.734211	648.863	FALSE	53
2022-09-14	11:51:43	0.735026	649.598	FALSE	53
2022-09-14	11:51:43	0.737773	650.335	FALSE	53
2022-09-14	11:51:44	0.726323	651.062	FALSE	53
2022-09-14	11:51:44	0.735789	651.797	FALSE	53
2022-09-14	11:51:44	0.726934	652.524	FALSE	53
2022-09-14	11:51:44	0.740267	653.265	FALSE	53
2022-09-14	11:51:45	0.735738	654	FALSE	53
2022-09-14	11:51:45	0.736399	654.737	FALSE	53
2022-09-14	11:51:45	0.725814	655.463	FALSE	53
2022-09-14	11:51:45	0.00785013	655.47	FALSE	53
2022-09-14	11:51:46	-6.60355	655.47	FALSE	53
2022-09-14	11:51:46	-5.46289	655.47	FALSE	53
2022-09-14	11:51:46	-0.356323	655.47	FALSE	53
2022-09-14	11:51:46	0.744694	656.215	FALSE	53
2022-09-14	11:51:47	0.736552	656.952	FALSE	53
2022-09-14	11:51:47	0.730038	657.682	FALSE	53
2022-09-14	11:51:47	0.734568	658.416	FALSE	53
2022-09-14	11:51:48	0.736349	659.153	FALSE	53
2022-09-14	11:51:48	0.828104	659.981	FALSE	53
2022-09-14	11:51:48	2.00637	661.987	FALSE	53
2022-09-14	11:51:48	3.00138	664.988	1	54
2022-09-14	11:51:49	1.79167	666.78	FALSE	54
2022-09-14	11:51:49	2.02897	668.809	FALSE	54
2022-09-14	11:51:49	1.76332	670.572	FALSE	54
2022-09-14	11:51:49	1.4965	672.069	FALSE	54
2022-09-14	11:51:50	2.11747	674.186	FALSE	54
2022-09-14	11:51:50	1.55462	675.741	FALSE	54
2022-09-14	11:51:50	0.735992	676.477	FALSE	54
2022-09-14	11:51:50	1.02754	677.505	FALSE	54
2022-09-14	11:51:51	0.648359	678.153	FALSE	54
2022-09-14	11:51:51	0.63243	678.785	FALSE	54
2022-09-14	11:51:51	0.507341	679.293	FALSE	54
2022-09-14	11:51:52	0.305865	679.599	FALSE	54
2022-09-14	11:51:52	0.455076	680.054	FALSE	54
2022-09-14	11:51:52	0.188054	680.242	FALSE	54
2022-09-14	11:51:52	0.340216	680.582	FALSE	54
2022-09-14	11:51:53	0.25528	680.837	FALSE	54
2022-09-14	11:51:53	0.37131	681.209	FALSE	54
2022-09-14	11:51:53	0.221489	681.43	FALSE	54
2022-09-14	11:51:53	0.212888	681.643	FALSE	54
2022-09-14	11:51:54	0.472837	682.116	FALSE	54
2022-09-14	11:51:54	0.587086	682.703	FALSE	54
2022-09-14	11:51:54	0.383779	683.087	FALSE	54
2022-09-14	11:51:54	0.488817	683.575	FALSE	54
2022-09-14	11:51:55	0.364593	683.94	FALSE	54
2022-09-14	11:51:55	0.504186	684.444	FALSE	54
2022-09-14	11:51:55	0.236654	684.681	FALSE	54
2022-09-14	11:51:56	0.488003	685.169	FALSE	54
2022-09-14	11:51:56	0.277265	685.446	FALSE	54
2022-09-14	11:51:56	0.520216	685.966	FALSE	54
2022-09-14	11:51:56	0.495534	686.462	FALSE	54
2022-09-14	11:51:57	0.971616	687.433	FALSE	54
2022-09-14	11:51:57	0.753041	688.187	FALSE	54
2022-09-14	11:51:57	1.07126	689.258	FALSE	54
2022-09-14	11:51:57	0.530903	689.789	FALSE	54
2022-09-14	11:51:58	0.620573	690.409	FALSE	54
2022-09-14	11:51:58	0.356043	690.765	FALSE	54
2022-09-14	11:51:58	0.416909	691.182	FALSE	54
2022-09-14	11:51:58	0.219199	691.401	FALSE	54
2022-09-14	11:51:59	0.276196	691.678	FALSE	54
2022-09-14	11:51:59	0.222761	691.9	FALSE	54
2022-09-14	11:51:59	0.363066	692.263	FALSE	54
2022-09-14	11:52:00	0.222252	692.486	FALSE	54
2022-09-14	11:52:00	0.467595	692.953	FALSE	54
2022-09-14	11:52:00	0.99645	693.95	FALSE	54
2022-09-14	11:52:00	1.50042	695.45	FALSE	54
2022-09-14	11:52:01	0.69299	696.143	FALSE	54
2022-09-14	11:52:01	0.493295	696.636	FALSE	54
2022-09-14	11:52:01	0.319606	696.956	FALSE	54
2022-09-14	11:52:01	0.201845	697.158	FALSE	54
2022-09-14	11:52:02	0.134822	697.293	FALSE	54
2022-09-14	11:52:02	-0.026501	697.293	FALSE	54
2022-09-14	11:52:02	0.0427101	697.335	FALSE	54
2022-09-14	11:52:02	-0.0454832	697.335	FALSE	54
2022-09-14	11:52:03	0.0073921	697.343	FALSE	54
2022-09-14	11:52:03	-0.062328	697.343	FALSE	54
2022-09-14	11:52:03	-0.149351	697.343	FALSE	54
2022-09-14	11:52:04	-0.0434476	697.343	FALSE	54
2022-09-14	11:52:04	-0.134236	697.343	FALSE	54
2022-09-14	11:52:04	0.0324303	697.375	FALSE	54
2022-09-14	11:52:04	-0.0112847	697.375	FALSE	54
2022-09-14	11:52:05	0.0955855	697.471	FALSE	54
2022-09-14	11:52:05	-0.0104705	697.471	FALSE	54
2022-09-14	11:52:05	0.123932	697.595	FALSE	54
2022-09-14	11:52:05	0.381845	697.977	FALSE	54
2022-09-14	11:52:06	0.799555	698.776	FALSE	54
2022-09-14	11:52:06	0.864135	699.64	FALSE	54
2022-09-14	11:52:06	1.51701	701.157	FALSE	54
2022-09-14	11:52:06	1.49095	702.648	FALSE	54
2022-09-14	11:52:07	1.06525	703.713	FALSE	54
2022-09-14	11:52:07	0.65472	704.368	FALSE	54
2022-09-14	11:52:07	0.494669	704.863	FALSE	54
2022-09-14	11:52:08	0.464898	705.328	FALSE	54
2022-09-14	11:52:08	0.437723	705.765	FALSE	54
2022-09-14	11:52:08	0.25299	706.018	FALSE	54
2022-09-14	11:52:08	0.118028	706.137	FALSE	54
2022-09-14	11:52:09	0.0622521	706.199	FALSE	54
2022-09-14	11:52:09	0.218079	706.417	FALSE	54
2022-09-14	11:52:09	-0.127213	706.417	FALSE	54
2022-09-14	11:52:09	-0.00802776	706.417	FALSE	54
2022-09-14	11:52:10	-0.0298089	706.417	FALSE	54
2022-09-14	11:52:10	0.0457127	706.463	FALSE	54
2022-09-14	11:52:10	-0.0953051	706.463	FALSE	54
2022-09-14	11:52:10	0.0340587	706.497	FALSE	54
2022-09-14	11:52:11	-0.172557	706.497	FALSE	54
2022-09-14	11:52:11	-0.534643	706.497	FALSE	54
2022-09-14	11:52:11	-0.649961	706.497	FALSE	54
2022-09-14	11:52:12	-0.498715	706.497	FALSE	54
2022-09-14	11:52:12	-0.077188	706.497	FALSE	54
2022-09-14	11:52:12	-0.0974425	706.497	FALSE	54
2022-09-14	11:52:12	0.186781	706.683	FALSE	54
2022-09-14	11:52:13	0.22897	706.912	FALSE	54
2022-09-14	11:52:13	-0.388333	706.912	FALSE	54
2022-09-14	11:52:13	0.373906	707.286	FALSE	54
2022-09-14	11:52:13	0.477774	707.764	FALSE	54
2022-09-14	11:52:14	0.40729	708.171	FALSE	54
2022-09-14	11:52:14	0.495331	708.667	FALSE	54
2022-09-14	11:52:14	0.386985	709.054	FALSE	54
2022-09-14	11:52:14	0.558893	709.613	FALSE	54
2022-09-14	11:52:15	0.329682	709.942	FALSE	54
2022-09-14	11:52:15	0.469377	710.412	FALSE	54
2022-09-14	11:52:15	0.421082	710.833	FALSE	54
2022-09-14	11:52:16	0.481997	711.315	FALSE	54
2022-09-14	11:52:16	0.354211	711.669	FALSE	54
2022-09-14	11:52:16	1.24668	712.916	FALSE	54
2022-09-14	11:52:16	0.392837	713.308	FALSE	54
2022-09-14	11:52:17	0.541997	713.85	FALSE	54
2022-09-14	11:52:17	0.484898	714.335	FALSE	54
2022-09-14	11:52:17	0.400878	714.736	FALSE	54
2022-09-14	11:52:17	0.484695	715.221	FALSE	54
2022-09-14	11:52:18	0.437672	715.659	FALSE	54
2022-09-14	11:52:18	0.547239	716.206	FALSE	54
2022-09-14	11:52:18	0.32383	716.53	FALSE	54
2022-09-14	11:52:18	0.545865	717.075	FALSE	54
2022-09-14	11:52:19	0.34673	717.422	FALSE	54

## Sheet: Ursula_harness_202291411471
2022-09-14	11:47:02	0.335026				**GoPro Fitting: 1136
2022-09-14	11:47:02	0.322506
2022-09-14	11:47:02	0.368512
2022-09-14	11:47:02	0.388155
2022-09-14	11:47:02	0.371005
2022-09-14	11:47:03	0.417468
2022-09-14	11:47:03	0.530445
2022-09-14	11:47:03	0.324949
2022-09-14	11:47:04	0.472328
2022-09-14	11:47:04	0.414059
2022-09-14	11:47:04	0.380267
2022-09-14	11:47:04	0.39701
2022-09-14	11:47:05	0.377825
2022-09-14	11:47:05	0.36668
2022-09-14	11:47:05	0.352736
2022-09-14	11:47:05	0.353753
2022-09-14	11:47:06	0.347087
2022-09-14	11:47:06	0.347443
2022-09-14	11:47:06	0.356196
2022-09-14	11:47:06	0.357468
2022-09-14	11:47:07	0.354059
2022-09-14	11:47:07	0.36612
2022-09-14	11:47:07	0.362913
2022-09-14	11:47:08	0.356247
2022-09-14	11:47:08	0.351921
2022-09-14	11:47:08	0.355331
2022-09-14	11:47:08	0.36444
2022-09-14	11:47:09	0.355178
2022-09-14	11:47:09	0.345051
2022-09-14	11:47:09	0.347748
2022-09-14	11:47:09	0.35986
2022-09-14	11:47:10	0.355738
2022-09-14	11:47:10	0.351718
2022-09-14	11:47:10	0.317723
2022-09-14	11:47:10	0.312379
2022-09-14	11:47:11	0.398639
2022-09-14	11:47:11	0.201336
2022-09-14	11:47:11	0.0961452
2022-09-14	11:47:12	-0.00853663
2022-09-14	11:47:12	-0.0991218
2022-09-14	11:47:12	0.233702
2022-09-14	11:47:13	-0.0940837
2022-09-14	11:47:13	0.17299
2022-09-14	11:47:13	0.0405219
2022-09-14	11:47:13	-0.142888
2022-09-14	11:47:13	0.0526338
2022-09-14	11:47:14	0.214669
2022-09-14	11:47:14	0.327901
2022-09-14	11:47:14	0.305713
2022-09-14	11:47:14	0.293906
2022-09-14	11:47:15	0.355942
2022-09-14	11:47:15	0.52785
2022-09-14	11:47:15	0.46388
2022-09-14	11:47:16	0.341234
2022-09-14	11:47:16	0.409529
2022-09-14	11:47:16	0.485814
2022-09-14	11:47:16	0.413702
2022-09-14	11:47:17	0.489936
2022-09-14	11:47:17	0.445865
2022-09-14	11:47:17	0.393041
2022-09-14	11:47:17	0.478639
2022-09-14	11:47:18	0.417621
2022-09-14	11:47:18	0.485051
2022-09-14	11:47:18	0.457672
2022-09-14	11:47:19	0.884796
2022-09-14	11:47:19	0.391412
2022-09-14	11:47:19	0.86103
2022-09-14	11:47:19	0.460318
2022-09-14	11:47:20	0.455789
2022-09-14	11:47:20	0.480522
2022-09-14	11:47:20	0.430089
2022-09-14	11:47:20	0.445255
2022-09-14	11:47:21	0.362405
2022-09-14	11:47:21	0.482201
2022-09-14	11:47:21	0.401947
2022-09-14	11:47:21	0.435636
2022-09-14	11:47:22	0.358791
2022-09-14	11:47:22	0.507035
2022-09-14	11:47:22	0.399504
2022-09-14	11:47:23	0.470751
2022-09-14	11:47:23	0.469784
2022-09-14	11:47:23	0.450395
2022-09-14	11:47:23	0.434669
2022-09-14	11:47:24	0.365916
2022-09-14	11:47:24	0.31869
2022-09-14	11:47:24	0.285255
2022-09-14	11:47:24	0.0638297
2022-09-14	11:47:25	0.298079
2022-09-14	11:47:25	0.126934
2022-09-14	11:47:25	-0.0839565
2022-09-14	11:47:25	-0.306348
2022-09-14	11:47:26	-0.489707
2022-09-14	11:47:26	-0.673422
2022-09-14	11:47:26	-0.822989
2022-09-14	11:47:27	-0.891182
2022-09-14	11:47:27	-0.819376
2022-09-14	11:47:27	-0.988485
2022-09-14	11:47:27	-0.82762
2022-09-14	11:47:28	-0.798256
2022-09-14	11:47:28	-0.80248
2022-09-14	11:47:28	-0.869147
2022-09-14	11:47:28	-0.435254
2022-09-14	11:47:29	-0.0247707
2022-09-14	11:47:29	0.267697
2022-09-14	11:47:29	0.355942
2022-09-14	11:47:29	0.197875
2022-09-14	11:47:30	0.499249
2022-09-14	11:47:30	0.428563
2022-09-14	11:47:30	0.51584
2022-09-14	11:47:31	-0.098562
2022-09-14	11:47:31	0.0459163
2022-09-14	11:47:31	0.0234735
2022-09-14	11:47:31	0.088359
2022-09-14	11:47:32	0.0978756
2022-09-14	11:47:32	0.13182
2022-09-14	11:47:32	0.267697
2022-09-14	11:47:32	0.210649
2022-09-14	11:47:33	0.181947
2022-09-14	11:47:33	0.195992
2022-09-14	11:47:33	0.0647967
2022-09-14	11:47:33	0.187595
2022-09-14	11:47:34	0.155433
2022-09-14	11:47:34	0.182812
2022-09-14	11:47:34	0.059962
2022-09-14	11:47:35	0.282405
2022-09-14	11:47:35	0.103423
2022-09-14	11:47:35	0.268664
2022-09-14	11:47:35	0.0755346
2022-09-14	11:47:36	0.204288
2022-09-14	11:47:36	0.166578
2022-09-14	11:47:36	-0.0265519
2022-09-14	11:47:36	-0.276832
2022-09-14	11:47:37	-0.434236
2022-09-14	11:47:37	-0.382175
2022-09-14	11:47:37	-0.42304
2022-09-14	11:47:37	-0.32991
2022-09-14	11:47:38	-0.366246
2022-09-14	11:47:38	-0.207722
2022-09-14	11:47:38	-0.189809
2022-09-14	11:47:39	-0.128944
2022-09-14	11:47:39	-0.325687
2022-09-14	11:47:39	-0.275152
2022-09-14	11:47:39	-0.258613
2022-09-14	11:47:40	-0.274745
2022-09-14	11:47:40	-0.322379
2022-09-14	11:47:40	-0.164771
2022-09-14	11:47:40	-0.169351
2022-09-14	11:47:41	0.0958399
2022-09-14	11:47:41	-0.14528
2022-09-14	11:47:41	-0.0562211
2022-09-14	11:47:41	-0.0625315
2022-09-14	11:47:42	0.0177738
2022-09-14	11:47:42	0.152736
2022-09-14	11:47:42	0.130649
2022-09-14	11:47:43	0.201692
2022-09-14	11:47:43	0.180166
2022-09-14	11:47:43	0.399962
2022-09-14	11:47:43	0.031158
2022-09-14	11:47:44	0.279097
2022-09-14	11:47:44	0.267392
2022-09-14	11:47:44	0.504389
2022-09-14	11:47:44	0.676348
2022-09-14	11:47:45	0.824338
2022-09-14	11:47:45	0.582608
2022-09-14	11:47:45	1.16454
2022-09-14	11:47:45	1.61691
2022-09-14	11:47:46	0.777773
2022-09-14	11:47:46	1.42917
2022-09-14	11:47:46	1.32383
2022-09-14	11:47:47	1.62078
2022-09-14	11:47:47	1.48184
2022-09-14	11:47:47	0.881031
2022-09-14	11:47:47	0.442608
2022-09-14	11:47:48	0.375484
2022-09-14	11:47:48	0.347138
2022-09-14	11:47:48	0.261692
2022-09-14	11:47:48	-0.0472644
2022-09-14	11:47:49	0.0834226
2022-09-14	11:47:49	0.3164
2022-09-14	11:47:49	0.309733
2022-09-14	11:47:49	-0.113931
2022-09-14	11:47:50	-0.329554
2022-09-14	11:47:50	-0.301259
2022-09-14	11:47:50	-0.236425
2022-09-14	11:47:51	-0.506654
2022-09-14	11:47:51	-0.654185
2022-09-14	11:47:51	-0.782378
2022-09-14	11:47:51	-0.720648
2022-09-14	11:47:52	-0.726602
2022-09-14	11:47:52	-0.646704
2022-09-14	11:47:52	-0.678409
2022-09-14	11:47:52	-0.538765
2022-09-14	11:47:53	-0.49444
2022-09-14	11:47:53	-0.552506
2022-09-14	11:47:53	-0.647315
2022-09-14	11:47:53	-0.665737
2022-09-14	11:47:54	-0.529656
2022-09-14	11:47:54	-0.545076
2022-09-14	11:47:54	-0.568231
2022-09-14	11:47:55	-0.551132
2022-09-14	11:47:55	-0.4893
2022-09-14	11:47:55	-0.405992
2022-09-14	11:47:55	-0.433168
2022-09-14	11:47:56	-0.303142
2022-09-14	11:47:56	-0.22299
2022-09-14	11:47:56	-0.279834
2022-09-14	11:47:56	-0.288028
2022-09-14	11:47:57	-0.323244
2022-09-14	11:47:57	-0.342379
2022-09-14	11:47:57	0.0234226
2022-09-14	11:47:57	0.0678501
2022-09-14	11:47:58	0.466272
2022-09-14	11:47:58	0.567901
2022-09-14	11:47:58	0.483779
2022-09-14	11:47:59	0.624542
2022-09-14	11:47:59	0.585356
2022-09-14	11:47:59	0.387697
2022-09-14	11:47:59	0.29757
2022-09-14	11:48:00	0.295636
2022-09-14	11:48:00	0.279504
2022-09-14	11:48:00	0.276501
2022-09-14	11:48:00	0.348003
2022-09-14	11:48:01	0.366934
2022-09-14	11:48:01	0.355331
2022-09-14	11:48:01	0.426221
2022-09-14	11:48:01	0.466985
2022-09-14	11:48:02	0.464949
2022-09-14	11:48:02	0.486018
2022-09-14	11:48:02	0.482354
2022-09-14	11:48:03	0.473244
2022-09-14	11:48:03	0.476552
2022-09-14	11:48:03	0.511209
2022-09-14	11:48:03	0.502252
2022-09-14	11:48:04	0.46271
2022-09-14	11:48:04	0.441081
2022-09-14	11:48:04	0.500725
2022-09-14	11:48:04	0.494516
2022-09-14	11:48:05	0.450191
2022-09-14	11:48:05	0.501794
2022-09-14	11:48:05	0.496247
2022-09-14	11:48:05	0.500878
2022-09-14	11:48:06	0.485611
2022-09-14	11:48:06	0.498588
2022-09-14	11:48:06	0.522404
2022-09-14	11:48:07	0.500063
2022-09-14	11:48:07	0.496756
2022-09-14	11:48:07	0.529529
2022-09-14	11:48:07	0.51411
2022-09-14	11:48:08	0.477468
2022-09-14	11:48:08	0.408257
2022-09-14	11:48:08	0.386629
2022-09-14	11:48:08	0.145509
2022-09-14	11:48:09	0.0255601
2022-09-14	11:48:09	0.659453
2022-09-14	11:48:09	0.446323
2022-09-14	11:48:09	-0.493625
2022-09-14	11:48:10	-0.336781
2022-09-14	11:48:10	-0.401666
2022-09-14	11:48:10	-0.342531
2022-09-14	11:48:11	-0.455966
2022-09-14	11:48:11	-0.502073
2022-09-14	11:48:11	-0.466043
2022-09-14	11:48:11	-0.501921
2022-09-14	11:48:12	-0.574185
2022-09-14	11:48:12	-0.478867
2022-09-14	11:48:12	-0.385534
2022-09-14	11:48:12	-0.392353
2022-09-14	11:48:13	-0.474491
2022-09-14	11:48:13	-0.155101
2022-09-14	11:48:13	-0.123855
2022-09-14	11:48:13	-0.00589033
2022-09-14	11:48:14	-0.090216
2022-09-14	11:48:14	0.174415
2022-09-14	11:48:14	0.0527865
2022-09-14	11:48:15	0.227952
2022-09-14	11:48:15	0.551005
2022-09-14	11:48:15	1.21905
2022-09-14	11:48:15	0.895636
2022-09-14	11:48:16	0.620267
2022-09-14	11:48:16	0.504084
2022-09-14	11:48:16	0.392735
2022-09-14	11:48:16	0.46841
2022-09-14	11:48:17	0.259657
2022-09-14	11:48:17	0.0593005
2022-09-14	11:48:17	-0.146348
2022-09-14	11:48:17	0.0419977
2022-09-14	11:48:18	0.226883
2022-09-14	11:48:18	0.323626
2022-09-14	11:48:18	0.115026
2022-09-14	11:48:19	0.37472
2022-09-14	11:48:19	0.314262
2022-09-14	11:48:19	0.395687
2022-09-14	11:48:19	0.183982
2022-09-14	11:48:20	0.347697
2022-09-14	11:48:20	0.265713
2022-09-14	11:48:20	0.352583
2022-09-14	11:48:20	0.0335498
2022-09-14	11:48:21	-0.185839
2022-09-14	11:48:21	-0.266552
2022-09-14	11:48:21	-0.285432
2022-09-14	11:48:21	-0.389656
2022-09-14	11:48:22	-0.130369
2022-09-14	11:48:22	0.0794022
2022-09-14	11:48:22	0.216451
2022-09-14	11:48:23	0.146985
2022-09-14	11:48:23	0.360573
2022-09-14	11:48:23	0.384746
2022-09-14	11:48:23	0.403473
2022-09-14	11:48:24	0.494466
2022-09-14	11:48:24	0.612277
2022-09-14	11:48:24	0.468054
2022-09-14	11:48:24	0.477265
2022-09-14	11:48:25	0.442863
2022-09-14	11:48:25	0.514415
2022-09-14	11:48:25	-0.178613
2022-09-14	11:48:25	-0.2579
2022-09-14	11:48:26	0.0550766
2022-09-14	11:48:26	0.137672
2022-09-14	11:48:26	0.242557
2022-09-14	11:48:27	0.699962
2022-09-14	11:48:27	2.15217
2022-09-14	11:48:27	3.67971
2022-09-14	11:48:27	4.24632
2022-09-14	11:48:28	1.21238
2022-09-14	11:48:28	1.00373
2022-09-14	11:48:28	0.611514
2022-09-14	11:48:28	0.525254
2022-09-14	11:48:29	0.638791
2022-09-14	11:48:29	0.786781
2022-09-14	11:48:29	0.653244
2022-09-14	11:48:29	0.63818
2022-09-14	11:48:30	0.691463
2022-09-14	11:48:30	0.745713
2022-09-14	11:48:30	0.740471
2022-09-14	11:48:31	0.689886
2022-09-14	11:48:31	0.752532
2022-09-14	11:48:31	0.716807
2022-09-14	11:48:31	0.821845
2022-09-14	11:48:32	0.839707
2022-09-14	11:48:32	0.621031
2022-09-14	11:48:32	0.620369
2022-09-14	11:48:32	0.636145
2022-09-14	11:48:33	0.640165
2022-09-14	11:48:33	0.646934
2022-09-14	11:48:33	0.54383
2022-09-14	11:48:33	0.521234
2022-09-14	11:48:34	0.515178
2022-09-14	11:48:34	0.52673
2022-09-14	11:48:34	0.571921
2022-09-14	11:48:35	0.599199
2022-09-14	11:48:35	0.600522
2022-09-14	11:48:35	0.504237
2022-09-14	11:48:35	0.478537
2022-09-14	11:48:36	0.430496
2022-09-14	11:48:36	0.42729
2022-09-14	11:48:36	0.458028
2022-09-14	11:48:36	0.474669
2022-09-14	11:48:37	0.423524
2022-09-14	11:48:37	0.524898
2022-09-14	11:48:37	0.469733
2022-09-14	11:48:37	0.552736
2022-09-14	11:48:38	0.575433
2022-09-14	11:48:38	0.551107
2022-09-14	11:48:38	0.534771
2022-09-14	11:48:39	0.455433
2022-09-14	11:48:39	0.497519
2022-09-14	11:48:39	0.453244
2022-09-14	11:48:39	0.461794
2022-09-14	11:48:40	0.467952
2022-09-14	11:48:40	0.471412
2022-09-14	11:48:40	0.435331
2022-09-14	11:48:40	0.467748
2022-09-14	11:48:41	0.502303
2022-09-14	11:48:41	0.45869
2022-09-14	11:48:41	0.437774
2022-09-14	11:48:41	0.563931
2022-09-14	11:48:42	0.491158
2022-09-14	11:48:42	0.499249
2022-09-14	11:48:42	0.363372
2022-09-14	11:48:43	-0.0848216
2022-09-14	11:48:43	-0.354185
2022-09-14	11:48:43	-0.50645
2022-09-14	11:48:43	-0.546399
2022-09-14	11:48:44	-0.743396
2022-09-14	11:48:44	-0.651539
2022-09-14	11:48:44	-0.712302
2022-09-14	11:48:44	-0.588027
2022-09-14	11:48:45	-0.642938
2022-09-14	11:48:45	-0.601361
2022-09-14	11:48:45	-0.630419
2022-09-14	11:48:45	-0.524567
2022-09-14	11:48:46	-0.556882
2022-09-14	11:48:46	-0.535916
2022-09-14	11:48:46	-0.605076
2022-09-14	11:48:47	-0.51505
2022-09-14	11:48:47	-0.507824
2022-09-14	11:48:47	-0.621361
2022-09-14	11:48:47	-0.599987
2022-09-14	11:48:48	-0.588282
2022-09-14	11:48:48	-0.453676
2022-09-14	11:48:48	-0.561666
2022-09-14	11:48:48	-0.610725
2022-09-14	11:48:49	-0.676933
2022-09-14	11:48:49	-0.657951
2022-09-14	11:48:49	-0.549351
2022-09-14	11:48:49	-0.612659
2022-09-14	11:48:50	-0.604516
2022-09-14	11:48:50	-0.686399
2022-09-14	11:48:50	-0.636526
2022-09-14	11:48:51	-0.513066
2022-09-14	11:48:51	-0.527926
2022-09-14	11:48:51	-0.575254
2022-09-14	11:48:51	-0.553931
2022-09-14	11:48:52	-0.555152
2022-09-14	11:48:52	-0.556017
2022-09-14	11:48:52	-0.574084
2022-09-14	11:48:52	-0.575559
2022-09-14	11:48:53	-0.572659
2022-09-14	11:48:53	-0.571285
2022-09-14	11:48:53	-0.569452
2022-09-14	11:48:53	-0.566348
2022-09-14	11:48:54	-0.562786
2022-09-14	11:48:54	-0.556221
2022-09-14	11:48:54	-0.552455
2022-09-14	11:48:55	-0.554236
2022-09-14	11:48:55	-0.550318
2022-09-14	11:48:55	-0.547162
2022-09-14	11:48:55	-0.551437
2022-09-14	11:48:56	-0.549045
2022-09-14	11:48:56	-0.544872
2022-09-14	11:48:56	-0.545941
2022-09-14	11:48:56	-0.541208
2022-09-14	11:48:57	-0.544262
2022-09-14	11:48:57	-0.551081
2022-09-14	11:48:57	-0.581819
2022-09-14	11:48:57	-0.626603
2022-09-14	11:48:58	-0.62533
2022-09-14	11:48:58	-0.688485
2022-09-14	11:48:58	-0.626043
2022-09-14	11:48:59	-0.650979
2022-09-14	11:48:59	-0.848587
2022-09-14	11:48:59	-0.6465
2022-09-14	11:48:59	-0.685635
2022-09-14	11:49:00	-0.665788
2022-09-14	11:49:00	-0.658104
2022-09-14	11:49:00	-0.607926
2022-09-14	11:49:00	-0.570623
2022-09-14	11:49:01	-0.642226
2022-09-14	11:49:01	-0.562379
2022-09-14	11:49:01	-0.633066
2022-09-14	11:49:01	-0.518867
2022-09-14	11:49:02	-0.60589
2022-09-14	11:49:02	-0.573778
2022-09-14	11:49:02	-0.638561
2022-09-14	11:49:03	-0.741819
2022-09-14	11:49:03	-0.549198
2022-09-14	11:49:03	-0.445737
2022-09-14	11:49:03	-0.356577
2022-09-14	11:49:04	-0.310572
2022-09-14	11:49:04	-0.167621
2022-09-14	11:49:04	-0.0966791
2022-09-14	11:49:04	0.0972648
2022-09-14	11:49:05	0.150293
2022-09-14	11:49:05	0.202303
2022-09-14	11:49:05	0.1993
2022-09-14	11:49:05	0.181539
2022-09-14	11:49:06	0.122405
2022-09-14	11:49:06	-0.00538142
2022-09-14	11:49:06	-0.0691473
2022-09-14	11:49:07	-0.159122
2022-09-14	11:49:07	-0.445025
2022-09-14	11:49:07	-0.687417
2022-09-14	11:49:07	-0.789503
2022-09-14	11:49:08	-0.646602
2022-09-14	11:49:08	-0.826399
2022-09-14	11:49:08	-0.723243
2022-09-14	11:49:08	-0.732251
2022-09-14	11:49:09	-0.63963
2022-09-14	11:49:09	-0.665432
2022-09-14	11:49:09	-0.518358
2022-09-14	11:49:09	-0.557035
2022-09-14	11:49:10	-0.590623
2022-09-14	11:49:10	-0.471437
2022-09-14	11:49:10	-0.527213
2022-09-14	11:49:11	-0.505941
2022-09-14	11:49:11	-0.561412
2022-09-14	11:49:11	-0.400852
2022-09-14	11:49:11	-0.440496
2022-09-14	11:49:12	-0.211946
2022-09-14	11:49:12	-0.297544
2022-09-14	11:49:12	-0.247926
2022-09-14	11:49:12	-0.103193
2022-09-14	11:49:13	-0.0872135
2022-09-14	11:49:13	-0.120852
2022-09-14	11:49:13	-0.178664
2022-09-14	11:49:13	-0.045585
2022-09-14	11:49:14	-0.0977987
2022-09-14	11:49:14	-0.0443636
2022-09-14	11:49:14	-0.216425
2022-09-14	11:49:15	-0.231743
2022-09-14	11:49:15	-0.0512847
2022-09-14	11:49:15	-0.127773
2022-09-14	11:49:15	-0.17673
2022-09-14	11:49:16	-0.324872
2022-09-14	11:49:16	-0.261717
2022-09-14	11:49:16	-0.268893
2022-09-14	11:49:16	-0.315
2022-09-14	11:49:17	-0.314033
2022-09-14	11:49:17	-0.345737
2022-09-14	11:49:17	-0.348944
2022-09-14	11:49:17	-0.275305
2022-09-14	11:49:18	-0.255712
2022-09-14	11:49:18	-0.338766
2022-09-14	11:49:18	-0.410827
2022-09-14	11:49:19	-0.398664
2022-09-14	11:49:19	-0.396323
2022-09-14	11:49:19	-0.495661
2022-09-14	11:49:19	-0.599427
2022-09-14	11:49:20	-0.665076
2022-09-14	11:49:20	-0.521157
2022-09-14	11:49:20	-0.553829
2022-09-14	11:49:20	-0.623142
2022-09-14	11:49:21	-0.56645
2022-09-14	11:49:21	-0.608435
2022-09-14	11:49:21	-0.473829
2022-09-14	11:49:21	-0.524109
2022-09-14	11:49:22	-0.485839
2022-09-14	11:49:22	-0.514999
2022-09-14	11:49:22	-0.554287
2022-09-14	11:49:23	-0.419936
2022-09-14	11:49:23	-0.47271
2022-09-14	11:49:23	-0.480903
2022-09-14	11:49:23	-0.566399
2022-09-14	11:49:24	-0.437799
2022-09-14	11:49:24	-0.458816
2022-09-14	11:49:24	-0.539885
2022-09-14	11:49:24	-0.501615
2022-09-14	11:49:25	-0.522022
2022-09-14	11:49:25	-0.308079
2022-09-14	11:49:25	-0.359529
2022-09-14	11:49:25	-0.437239
2022-09-14	11:49:26	-0.430419
2022-09-14	11:49:26	-0.512964
2022-09-14	11:49:26	-0.281921
2022-09-14	11:49:27	-0.272353
2022-09-14	11:49:27	-0.260496
2022-09-14	11:49:27	-0.315916
2022-09-14	11:49:27	-0.185992
2022-09-14	11:49:28	-0.109707
2022-09-14	11:49:28	-0.234745
2022-09-14	11:49:28	-0.0972389
2022-09-14	11:49:28	0.283524
2022-09-14	11:49:29	0.336908
2022-09-14	11:49:29	0.207443
2022-09-14	11:49:29	0.130802
2022-09-14	11:49:29	0.127138
2022-09-14	11:49:30	0.162659
2022-09-14	11:49:30	-0.0164756
2022-09-14	11:49:30	0.0210308
2022-09-14	11:49:31	0.0530918
2022-09-14	11:49:31	0.0589952
2022-09-14	11:49:31	-0.153626
2022-09-14	11:49:31	-0.0476715
2022-09-14	11:49:32	-0.0451778
2022-09-14	11:49:32	0.0927865
2022-09-14	11:49:32	0.179708
2022-09-14	11:49:32	0.128512
2022-09-14	11:49:33	0.239351
2022-09-14	11:49:33	-0.0854832
2022-09-14	11:49:33	0.163881
2022-09-14	11:49:33	0.139453
2022-09-14	11:49:34	0.35701
2022-09-14	11:49:34	0.00917326
2022-09-14	11:49:34	0.321183
2022-09-14	11:49:35	0.32042
2022-09-14	11:49:35	0.280674
2022-09-14	11:49:35	0.233295
2022-09-14	11:49:35	0.207392
2022-09-14	11:49:36	0.299351
2022-09-14	11:49:36	0.268003
2022-09-14	11:49:36	0.431311
2022-09-14	11:49:36	0.209275
2022-09-14	11:49:37	0.392023
2022-09-14	11:49:37	0.33813
2022-09-14	11:49:37	0.340725
2022-09-14	11:49:37	0.372939
2022-09-14	11:49:38	0.264338
2022-09-14	11:49:38	0.403779
2022-09-14	11:49:38	0.299046
2022-09-14	11:49:39	0.461794
2022-09-14	11:49:39	0.303066
2022-09-14	11:49:39	0.372227
2022-09-14	11:49:39	0.310395
2022-09-14	11:49:40	0.340776
2022-09-14	11:49:40	0.383524
2022-09-14	11:49:40	0.278384
2022-09-14	11:49:40	0.473499
2022-09-14	11:49:41	0.339758
2022-09-14	11:49:41	0.422506
2022-09-14	11:49:41	0.339606
2022-09-14	11:49:41	0.348919
2022-09-14	11:49:42	0.425764
2022-09-14	11:49:42	0.331565
2022-09-14	11:49:42	0.467341
2022-09-14	11:49:43	0.350496
2022-09-14	11:49:43	0.373244
2022-09-14	11:49:43	0.349275
2022-09-14	11:49:43	0.337316
2022-09-14	11:49:44	0.512735
2022-09-14	11:49:44	0.323575
2022-09-14	11:49:44	0.386323
2022-09-14	11:49:44	0.365865
2022-09-14	11:49:45	0.323677
2022-09-14	11:49:45	0.454008
2022-09-14	11:49:45	0.316858
2022-09-14	11:49:45	0.439504
2022-09-14	11:49:46	0.382099
2022-09-14	11:49:46	0.41869
2022-09-14	11:49:46	0.407952
2022-09-14	11:49:47	0.311565
2022-09-14	11:49:47	0.480522
2022-09-14	11:49:47	0.358639
2022-09-14	11:49:47	0.412176
2022-09-14	11:49:48	0.400216
2022-09-14	11:49:48	0.297824
2022-09-14	11:49:48	0.38154
2022-09-14	11:49:48	0.312277
2022-09-14	11:49:49	0.352634
2022-09-14	11:49:49	0.454415
2022-09-14	11:49:49	0.346883
2022-09-14	11:49:49	0.384593
2022-09-14	11:49:50	0.282456
2022-09-14	11:49:50	0.309886
2022-09-14	11:49:50	0.520064
2022-09-14	11:49:51	0.37986
2022-09-14	11:49:51	0.2907
2022-09-14	11:49:51	0.37411
2022-09-14	11:49:51	0.210242
2022-09-14	11:49:52	0.308206
2022-09-14	11:49:52	0.312023
2022-09-14	11:49:52	0.23528
2022-09-14	11:49:52	0.435026
2022-09-14	11:49:53	0.312227
2022-09-14	11:49:53	0.279504
2022-09-14	11:49:53	0.445458
2022-09-14	11:49:53	0.295789
2022-09-14	11:49:54	0.32673
2022-09-14	11:49:54	0.274669
2022-09-14	11:49:54	0.240216
2022-09-14	11:49:55	0.429529
2022-09-14	11:49:55	0.295992
2022-09-14	11:49:55	0.245509
2022-09-14	11:49:55	0.423473
2022-09-14	11:49:56	0.325865
2022-09-14	11:49:56	0.378537
2022-09-14	11:49:56	0.357977
2022-09-14	11:49:56	0.446171
2022-09-14	11:49:57	0.903219
2022-09-14	11:49:57	0.945967
2022-09-14	11:49:57	0.835789
2022-09-14	11:49:57	0.516043
2022-09-14	11:49:58	0.454415
2022-09-14	11:49:58	0.417926
2022-09-14	11:49:58	0.458435
2022-09-14	11:49:59	0.432379
2022-09-14	11:49:59	0.416247
2022-09-14	11:49:59	0.424033
2022-09-14	11:49:59	0.45986
2022-09-14	11:50:00	0.37187
2022-09-14	11:50:00	0.401743
2022-09-14	11:50:00	0.378741
2022-09-14	11:50:00	0.400878
2022-09-14	11:50:01	0.409428
2022-09-14	11:50:01	0.369529
2022-09-14	11:50:01	0.38042
2022-09-14	11:50:01	0.455483
2022-09-14	11:50:02	0.359249
2022-09-14	11:50:02	0.376349
2022-09-14	11:50:02	0.347494
2022-09-14	11:50:03	0.361489
2022-09-14	11:50:03	0.412532
2022-09-14	11:50:03	0.376043
2022-09-14	11:50:03	0.413041
2022-09-14	11:50:04	0.441896
2022-09-14	11:50:04	0.570038
2022-09-14	11:50:04	0.436349
2022-09-14	11:50:04	0.467952
2022-09-14	11:50:05	0.506629
2022-09-14	11:50:05	0.415076
2022-09-14	11:50:05	0.512125
2022-09-14	11:50:05	0.558486
2022-09-14	11:50:06	0.595178
2022-09-14	11:50:06	0.602659
2022-09-14	11:50:06	0.599657
2022-09-14	11:50:07	0.679148
2022-09-14	11:50:07	0.670496
2022-09-14	11:50:07	0.6536
2022-09-14	11:50:07	0.632277
2022-09-14	11:50:08	0.652277
2022-09-14	11:50:08	0.697163
2022-09-14	11:50:08	0.708206
2022-09-14	11:50:08	1.07961
2022-09-14	11:50:09	0.358842
2022-09-14	11:50:09	0.436145
2022-09-14	11:50:09	0.414873
2022-09-14	11:50:09	0.450395
2022-09-14	11:50:10	0.448613
2022-09-14	11:50:10	0.425611
2022-09-14	11:50:10	0.427087
2022-09-14	11:50:11	0.381489
2022-09-14	11:50:11	0.381998
2022-09-14	11:50:11	0.396959
2022-09-14	11:50:11	0.415738
2022-09-14	11:50:12	0.408868
2022-09-14	11:50:12	0.405356
2022-09-14	11:50:12	0.478486
2022-09-14	11:50:12	0.57014
2022-09-14	11:50:13	0.663371
2022-09-14	11:50:13	0.535178
2022-09-14	11:50:13	0.581438
2022-09-14	11:50:13	1.01411
2022-09-14	11:50:14	0.46897
2022-09-14	11:50:14	0.610903
2022-09-14	11:50:14	0.501336
2022-09-14	11:50:15	0.449529
2022-09-14	11:50:15	0.428512
2022-09-14	11:50:15	0.480064
2022-09-14	11:50:15	0.440216
2022-09-14	11:50:16	0.452023
2022-09-14	11:50:16	0.504695
2022-09-14	11:50:16	0.566171
2022-09-14	11:50:16	0.784847
2022-09-14	11:50:17	1.47854
2022-09-14	11:50:17	1.76617
2022-09-14	11:50:17	2.31223
2022-09-14	11:50:17	1.60958
2022-09-14	11:50:18	1.17029
2022-09-14	11:50:18	1.28678
2022-09-14	11:50:18	-1.25871
2022-09-14	11:50:19	0.689631
2022-09-14	11:50:19	0.775534
2022-09-14	11:50:19	1.06912
2022-09-14	11:50:19	1.31375
2022-09-14	11:50:20	1.41961
2022-09-14	11:50:20	1.32098
2022-09-14	11:50:20	1.05085
2022-09-14	11:50:20	-1.24411
2022-09-14	11:50:21	0.83874
2022-09-14	11:50:21	0.772125
2022-09-14	11:50:21	0.739962
2022-09-14	11:50:21	0.831463
2022-09-14	11:50:22	0.834415
2022-09-14	11:50:22	0.749987
2022-09-14	11:50:22	0.663015
2022-09-14	11:50:23	1.05625
2022-09-14	11:50:23	1.24108
2022-09-14	11:50:23	0.922405
2022-09-14	11:50:23	0.764338
2022-09-14	11:50:24	0.921234
2022-09-14	11:50:24	0.92673
2022-09-14	11:50:24	1.11095
2022-09-14	11:50:24	1.11279
2022-09-14	11:50:25	1.5649
2022-09-14	11:50:25	2.80439
2022-09-14	11:50:25	2.3996
2022-09-14	11:50:25	2.7677
2022-09-14	11:50:26	0.910038
2022-09-14	11:50:26	0.210853
2022-09-14	11:50:26	0.440369
2022-09-14	11:50:27	0.363473
2022-09-14	11:50:27	0.448053
2022-09-14	11:50:27	0.136603
2022-09-14	11:50:27	0.363779
2022-09-14	11:50:28	0.348664
2022-09-14	11:50:28	0.297112
2022-09-14	11:50:28	0.104084
2022-09-14	11:50:28	0.438791
2022-09-14	11:50:29	0.466629
2022-09-14	11:50:29	0.602608
2022-09-14	11:50:29	0.455738
2022-09-14	11:50:29	0.42612
2022-09-14	11:50:30	0.382252
2022-09-14	11:50:30	0.351158
2022-09-14	11:50:30	0.370496
2022-09-14	11:50:31	0.30215
2022-09-14	11:50:31	0.500471
2022-09-14	11:50:31	0.260573
2022-09-14	11:50:31	0.397316
2022-09-14	11:50:32	0.245
2022-09-14	11:50:32	0.410344
2022-09-14	11:50:32	0.451056
2022-09-14	11:50:32	0.508817
2022-09-14	11:50:33	0.340064
2022-09-14	11:50:33	0.402812
2022-09-14	11:50:33	0.288155
2022-09-14	11:50:33	0.319148
2022-09-14	11:50:34	0.311107
2022-09-14	11:50:34	0.17869
2022-09-14	11:50:34	0.274873
2022-09-14	11:50:35	-0.00955446
2022-09-14	11:50:35	-0.0211066
2022-09-14	11:50:35	-0.00619567
2022-09-14	11:50:35	0.0824048
2022-09-14	11:50:36	0.280471
2022-09-14	11:50:36	0.526832
2022-09-14	11:50:36	0.496909
2022-09-14	11:50:36	0.29355
2022-09-14	11:50:37	0.206272
2022-09-14	11:50:37	0.0113616
2022-09-14	11:50:37	-0.0901651
2022-09-14	11:50:37	-0.181208
2022-09-14	11:50:38	-0.430063
2022-09-14	11:50:38	-0.375356
2022-09-14	11:50:38	-0.370267
2022-09-14	11:50:39	-0.391895
2022-09-14	11:50:39	-0.36701
2022-09-14	11:50:39	-0.320852
2022-09-14	11:50:39	-0.21042
2022-09-14	11:50:40	-0.210725
2022-09-14	11:50:40	-0.132964
2022-09-14	11:50:40	-0.162989
2022-09-14	11:50:40	-0.26014
2022-09-14	11:50:41	-0.252455
2022-09-14	11:50:41	-0.236577
2022-09-14	11:50:41	-0.186043
2022-09-14	11:50:41	-0.199122
2022-09-14	11:50:42	-0.23617
2022-09-14	11:50:42	-0.235712
2022-09-14	11:50:42	0.115535
2022-09-14	11:50:43	0.128054
2022-09-14	11:50:43	0.391819
2022-09-14	11:50:43	0.217875
2022-09-14	11:50:43	0.155738
2022-09-14	11:50:44	0.375534
2022-09-14	11:50:44	0.229478
2022-09-14	11:50:44	0.431565
2022-09-14	11:50:44	0.187545
2022-09-14	11:50:45	0.285255
2022-09-14	11:50:45	0.335433
2022-09-14	11:50:45	0.253804
2022-09-14	11:50:45	0.400471
2022-09-14	11:50:46	0.189377
2022-09-14	11:50:46	0.269224
2022-09-14	11:50:46	0.339555
2022-09-14	11:50:47	0.22897
2022-09-14	11:50:47	0.273143
2022-09-14	11:50:47	0.155687
2022-09-14	11:50:47	0.0998094
2022-09-14	11:50:48	0.278435
2022-09-14	11:50:48	0.202354
2022-09-14	11:50:48	0.142812
2022-09-14	11:50:48	0.0132445
2022-09-14	11:50:49	-0.00700993
2022-09-14	11:50:49	0.116909
2022-09-14	11:50:49	0.103372
2022-09-14	11:50:49	0.0814379
2022-09-14	11:50:50	0.204746
2022-09-14	11:50:50	0.180573
2022-09-14	11:50:50	0.152837
2022-09-14	11:50:51	0.232837
2022-09-14	11:50:51	0.175687
2022-09-14	11:50:51	0.31131
2022-09-14	11:50:51	0.110395
2022-09-14	11:50:52	0.277723
2022-09-14	11:50:52	0.228104
2022-09-14	11:50:52	0.266578
2022-09-14	11:50:52	0.364797
2022-09-14	11:50:53	0.146934
2022-09-14	11:50:53	0.267596
2022-09-14	11:50:53	0.199351
2022-09-14	11:50:53	0.213397
2022-09-14	11:50:54	0.329377
2022-09-14	11:50:54	0.0768577
2022-09-14	11:50:54	0.213143
2022-09-14	11:50:55	0.295789
2022-09-14	11:50:55	0.364135
2022-09-14	11:50:55	0.761997
2022-09-14	11:50:55	0.338028
2022-09-14	11:50:56	0.252583
2022-09-14	11:50:56	0.286018
2022-09-14	11:50:56	0.308969
2022-09-14	11:50:56	0.372685
2022-09-14	11:50:57	0.220674
2022-09-14	11:50:57	0.298232
2022-09-14	11:50:57	0.284491
2022-09-14	11:50:57	0.279402
2022-09-14	11:50:58	0.311514
2022-09-14	11:50:58	0.337163
2022-09-14	11:50:58	0.313448
2022-09-14	11:50:59	0.288308
2022-09-14	11:50:59	0.331005
2022-09-14	11:50:59	0.497112
2022-09-14	11:50:59	1.03223
2022-09-14	11:51:00	2.2137
2022-09-14	11:51:00	2.1767
2022-09-14	11:51:00	2.36866
2022-09-14	11:51:00	2.95843
2022-09-14	11:51:01	3.53146
2022-09-14	11:51:01	3.86429
2022-09-14	11:51:01	2.59594
2022-09-14	11:51:01	2.60403
2022-09-14	11:51:02	2.40413
2022-09-14	11:51:02	2.09889
2022-09-14	11:51:02	2.55793
2022-09-14	11:51:03	3.88062
2022-09-14	11:51:03	4.45284
2022-09-14	11:51:03	4.01904
2022-09-14	11:51:03	3.85497
2022-09-14	11:51:04	4.35116
2022-09-14	11:51:04	4.92398
2022-09-14	11:51:04	5.47227
2022-09-14	11:51:04	6.10464
2022-09-14	11:51:05	6.21355
2022-09-14	11:51:05	5.7792
2022-09-14	11:51:05	6.04378
2022-09-14	11:51:05	6.27965
2022-09-14	11:51:06	4.96103
2022-09-14	11:51:06	3.49238
2022-09-14	11:51:06	3.1592
2022-09-14	11:51:07	2.52011
2022-09-14	11:51:07	0.716552
2022-09-14	11:51:07	0.740267
2022-09-14	11:51:07	0.478893
2022-09-14	11:51:08	0.924898
2022-09-14	11:51:08	1.16887
2022-09-14	11:51:08	1.13156
2022-09-14	11:51:08	1.89513
2022-09-14	11:51:09	2.19192
2022-09-14	11:51:09	2.35223
2022-09-14	11:51:09	2.28088
2022-09-14	11:51:09	2.22128
2022-09-14	11:51:10	2.35335
2022-09-14	11:51:10	2.52642
2022-09-14	11:51:10	2.55879
2022-09-14	11:51:11	2.72581
2022-09-14	11:51:11	1.43365
2022-09-14	11:51:11	0.728512
2022-09-14	11:51:11	0.979504
2022-09-14	11:51:12	2.46098
2022-09-14	11:51:12	3.04093
2022-09-14	11:51:12	3.15126
2022-09-14	11:51:12	3.63355
2022-09-14	11:51:13	3.5565
2022-09-14	11:51:13	4.03228
2022-09-14	11:51:13	3.77161
2022-09-14	11:51:13	4.94983
2022-09-14	11:51:14	6.34968
2022-09-14	11:51:14	6.56169
2022-09-14	11:51:14	6.5197
2022-09-14	11:51:15	6.2224
2022-09-14	11:51:15	5.92245
2022-09-14	11:51:15	6.12413
2022-09-14	11:51:15	6.07741
2022-09-14	11:51:16	5.62357
2022-09-14	11:51:16	5.94474
2022-09-14	11:51:16	5.84413
2022-09-14	11:51:16	5.83141
2022-09-14	11:51:17	5.74215
2022-09-14	11:51:17	5.66042
2022-09-14	11:51:17	5.02184
2022-09-14	11:51:17	4.78322
2022-09-14	11:51:18	4.69966
2022-09-14	11:51:18	4.26276
2022-09-14	11:51:18	3.83558
2022-09-14	11:51:19	3.73721
2022-09-14	11:51:19	3.38647
2022-09-14	11:51:19	3.3021
2022-09-14	11:51:19	2.75284
2022-09-14	11:51:20	2.1767
2022-09-14	11:51:20	1.93701
2022-09-14	11:51:20	1.93131
2022-09-14	11:51:20	2.39447
2022-09-14	11:51:21	2.31065
2022-09-14	11:51:21	2.99161
2022-09-14	11:51:21	3.33981
2022-09-14	11:51:21	3.25263
2022-09-14	11:51:22	3.50301
2022-09-14	11:51:22	3.31441
2022-09-14	11:51:22	2.90724
2022-09-14	11:51:23	3.21049
2022-09-14	11:51:23	3.01482
2022-09-14	11:51:23	2.84245
2022-09-14	11:51:23	1.7249
2022-09-14	11:51:24	1.72444
2022-09-14	11:51:24	1.84734
2022-09-14	11:51:24	2.09279
2022-09-14	11:51:24	0.868002
2022-09-14	11:51:25	0.737417
2022-09-14	11:51:25	0.72958
2022-09-14	11:51:25	0.742964
2022-09-14	11:51:25	0.737468
2022-09-14	11:51:26	0.736654
2022-09-14	11:51:26	0.734873
2022-09-14	11:51:26	0.72841
2022-09-14	11:51:27	0.736756
2022-09-14	11:51:27	0.73355
2022-09-14	11:51:27	0.731616
2022-09-14	11:51:27	0.737315
2022-09-14	11:51:28	0.738893
2022-09-14	11:51:28	0.733957
2022-09-14	11:51:28	0.729173
2022-09-14	11:51:28	0.738791
2022-09-14	11:51:29	0.730191
2022-09-14	11:51:29	0.733193
2022-09-14	11:51:29	0.733855
2022-09-14	11:51:29	0.74042
2022-09-14	11:51:30	0.731158
2022-09-14	11:51:30	0.732074
2022-09-14	11:51:30	0.735687
2022-09-14	11:51:31	0.72841
2022-09-14	11:51:31	0.73416
2022-09-14	11:51:31	0.735992
2022-09-14	11:51:31	0.735585
2022-09-14	11:51:32	0.732532
2022-09-14	11:51:32	0.738231
2022-09-14	11:51:32	0.732583
2022-09-14	11:51:32	0.743219
2022-09-14	11:51:33	0.728817
2022-09-14	11:51:33	0.737112
2022-09-14	11:51:33	0.731768
2022-09-14	11:51:33	0.735534
2022-09-14	11:51:34	0.733346
2022-09-14	11:51:34	0.735585
2022-09-14	11:51:34	0.740369
2022-09-14	11:51:35	0.739147
2022-09-14	11:51:35	0.740267
2022-09-14	11:51:35	0.728054
2022-09-14	11:51:35	0.731819
2022-09-14	11:51:36	0.732328
2022-09-14	11:51:36	0.728919
2022-09-14	11:51:36	0.737875
2022-09-14	11:51:36	0.728613
2022-09-14	11:51:37	0.732074
2022-09-14	11:51:37	0.739147
2022-09-14	11:51:37	0.734873
2022-09-14	11:51:37	0.732074
2022-09-14	11:51:38	0.728257
2022-09-14	11:51:38	0.738588
2022-09-14	11:51:38	0.738486
2022-09-14	11:51:38	0.728206
2022-09-14	11:51:39	0.729377
2022-09-14	11:51:39	0.733448
2022-09-14	11:51:39	0.735382
2022-09-14	11:51:40	0.738282
2022-09-14	11:51:40	0.739707
2022-09-14	11:51:40	0.73701
2022-09-14	11:51:40	0.737519
2022-09-14	11:51:41	0.733092
2022-09-14	11:51:41	0.734873
2022-09-14	11:51:41	0.733346
2022-09-14	11:51:41	0.738028
2022-09-14	11:51:42	0.732074
2022-09-14	11:51:42	0.732837
2022-09-14	11:51:42	0.737773
2022-09-14	11:51:42	0.738689
2022-09-14	11:51:43	0.734211
2022-09-14	11:51:43	0.735026
2022-09-14	11:51:43	0.737773
2022-09-14	11:51:44	0.726323
2022-09-14	11:51:44	0.735789
2022-09-14	11:51:44	0.726934
2022-09-14	11:51:44	0.740267
2022-09-14	11:51:45	0.735738
2022-09-14	11:51:45	0.736399
2022-09-14	11:51:45	0.725814
2022-09-14	11:51:45	0.00785013
2022-09-14	11:51:46	-6.60355
2022-09-14	11:51:46	-5.46289
2022-09-14	11:51:46	-0.356323
2022-09-14	11:51:46	0.744694
2022-09-14	11:51:47	0.736552
2022-09-14	11:51:47	0.730038
2022-09-14	11:51:47	0.734568
2022-09-14	11:51:48	0.736349
2022-09-14	11:51:48	0.828104
2022-09-14	11:51:48	2.00637
2022-09-14	11:51:48	3.00138
2022-09-14	11:51:49	1.79167
2022-09-14	11:51:49	2.02897
2022-09-14	11:51:49	1.76332
2022-09-14	11:51:49	1.4965
2022-09-14	11:51:50	2.11747
2022-09-14	11:51:50	1.55462
2022-09-14	11:51:50	0.735992
2022-09-14	11:51:50	1.02754
2022-09-14	11:51:51	0.648359
2022-09-14	11:51:51	0.63243
2022-09-14	11:51:51	0.507341
2022-09-14	11:51:52	0.305865
2022-09-14	11:51:52	0.455076
2022-09-14	11:51:52	0.188054
2022-09-14	11:51:52	0.340216
2022-09-14	11:51:53	0.25528
2022-09-14	11:51:53	0.37131
2022-09-14	11:51:53	0.221489
2022-09-14	11:51:53	0.212888
2022-09-14	11:51:54	0.472837
2022-09-14	11:51:54	0.587086
2022-09-14	11:51:54	0.383779
2022-09-14	11:51:54	0.488817
2022-09-14	11:51:55	0.364593
2022-09-14	11:51:55	0.504186
2022-09-14	11:51:55	0.236654
2022-09-14	11:51:56	0.488003
2022-09-14	11:51:56	0.277265
2022-09-14	11:51:56	0.520216
2022-09-14	11:51:56	0.495534
2022-09-14	11:51:57	0.971616
2022-09-14	11:51:57	0.753041
2022-09-14	11:51:57	1.07126
2022-09-14	11:51:57	0.530903
2022-09-14	11:51:58	0.620573
2022-09-14	11:51:58	0.356043
2022-09-14	11:51:58	0.416909
2022-09-14	11:51:58	0.219199
2022-09-14	11:51:59	0.276196
2022-09-14	11:51:59	0.222761
2022-09-14	11:51:59	0.363066
2022-09-14	11:52:00	0.222252
2022-09-14	11:52:00	0.467595
2022-09-14	11:52:00	0.99645
2022-09-14	11:52:00	1.50042
2022-09-14	11:52:01	0.69299
2022-09-14	11:52:01	0.493295
2022-09-14	11:52:01	0.319606
2022-09-14	11:52:01	0.201845
2022-09-14	11:52:02	0.134822
2022-09-14	11:52:02	-0.026501
2022-09-14	11:52:02	0.0427101
2022-09-14	11:52:02	-0.0454832
2022-09-14	11:52:03	0.0073921
2022-09-14	11:52:03	-0.062328
2022-09-14	11:52:03	-0.149351
2022-09-14	11:52:04	-0.0434476
2022-09-14	11:52:04	-0.134236
2022-09-14	11:52:04	0.0324303
2022-09-14	11:52:04	-0.0112847
2022-09-14	11:52:05	0.0955855
2022-09-14	11:52:05	-0.0104705
2022-09-14	11:52:05	0.123932
2022-09-14	11:52:05	0.381845
2022-09-14	11:52:06	0.799555
2022-09-14	11:52:06	0.864135
2022-09-14	11:52:06	1.51701
2022-09-14	11:52:06	1.49095
2022-09-14	11:52:07	1.06525
2022-09-14	11:52:07	0.65472
2022-09-14	11:52:07	0.494669
2022-09-14	11:52:08	0.464898
2022-09-14	11:52:08	0.437723
2022-09-14	11:52:08	0.25299
2022-09-14	11:52:08	0.118028
2022-09-14	11:52:09	0.0622521
2022-09-14	11:52:09	0.218079
2022-09-14	11:52:09	-0.127213
2022-09-14	11:52:09	-0.00802776
2022-09-14	11:52:10	-0.0298089
2022-09-14	11:52:10	0.0457127
2022-09-14	11:52:10	-0.0953051
2022-09-14	11:52:10	0.0340587
2022-09-14	11:52:11	-0.172557
2022-09-14	11:52:11	-0.534643
2022-09-14	11:52:11	-0.649961
2022-09-14	11:52:12	-0.498715
2022-09-14	11:52:12	-0.077188
2022-09-14	11:52:12	-0.0974425
2022-09-14	11:52:12	0.186781
2022-09-14	11:52:13	0.22897
2022-09-14	11:52:13	-0.388333
2022-09-14	11:52:13	0.373906
2022-09-14	11:52:13	0.477774
2022-09-14	11:52:14	0.40729
2022-09-14	11:52:14	0.495331
2022-09-14	11:52:14	0.386985
2022-09-14	11:52:14	0.558893
2022-09-14	11:52:15	0.329682
2022-09-14	11:52:15	0.469377
2022-09-14	11:52:15	0.421082
2022-09-14	11:52:16	0.481997
2022-09-14	11:52:16	0.354211
2022-09-14	11:52:16	1.24668
2022-09-14	11:52:16	0.392837
2022-09-14	11:52:17	0.541997
2022-09-14	11:52:17	0.484898
2022-09-14	11:52:17	0.400878
2022-09-14	11:52:17	0.484695
2022-09-14	11:52:18	0.437672
2022-09-14	11:52:18	0.547239
2022-09-14	11:52:18	0.32383
2022-09-14	11:52:18	0.545865
2022-09-14	11:52:19	0.34673
