# Supplementary material for: Comparing efficacy in reducing pulling and welfare impacts of four types of leash walking equipment
Source: PeerJ journal article supplement (doi:10.7717/peerj.18131), 2024-10-24
Supplement: Shelter_2_Tension_files.zip [file Ursula_martin_2022914104350 copy.xlsx]

## Sheet: Averaged Newtons
Date	Time	Averaged Newtons	impulse	total steps
2022-09-14	10:44:07	12.7144	12.7144	0
2022-09-14	10:44:08	7.3281	20.0425	0		Impulse newtons	973.117
2022-09-14	10:44:09	1.13791	21.1804	0		Total steps	8
2022-09-14	10:44:10	1.0474	22.2278	0		# > 5sec	0
2022-09-14	10:44:11	2.64079	24.8686	0
2022-09-14	10:44:12	1.64634	26.5149	0
2022-09-14	10:44:13	0.907882	27.4228	0
2022-09-14	10:44:14	2.11346	29.5363	0
2022-09-14	10:44:15	1.45291	30.9892	0
2022-09-14	10:44:16	1.45636	32.4455	0
2022-09-14	10:44:17	1.82229	34.2678	0
2022-09-14	10:44:18	1.9925	36.2603	0
2022-09-14	10:44:19	1.76576	38.0261	0
2022-09-14	10:44:20	2.30373	40.3298	0
2022-09-14	10:44:21	4.71537	45.0452	0
2022-09-14	10:44:22	1.56942	46.6146	0
2022-09-14	10:44:23	4.20576	50.8204	0
2022-09-14	10:44:24	3.63615	54.4565	0
2022-09-14	10:44:25	1.5301	55.9866	0
2022-09-14	10:44:26	0.873626	56.8602	0
2022-09-14	10:44:27	0.936613	57.7969	0
2022-09-14	10:44:28	0.929823	58.7267	0
2022-09-14	10:44:29	0.769494	59.4962	0
2022-09-14	10:44:30	0.980868	60.477	0
2022-09-14	10:44:31	0.588095	61.0651	0
2022-09-14	10:44:32	1.28726	62.3524	0
2022-09-14	10:44:33	0.861457	63.2139	0
2022-09-14	10:44:34	0.553479	63.7673	0
2022-09-14	10:44:35	-0.187755	63.7673	0
2022-09-14	10:44:36	-1.15896	63.7673	0
2022-09-14	10:44:37	-0.536838	63.7673	0
2022-09-14	10:44:38	8.36053	72.1279	0
2022-09-14	10:44:39	16.6562	88.7841	1
2022-09-14	10:44:40	7.65164	96.4357	1
2022-09-14	10:44:41	5.8389	102.275	1
2022-09-14	10:44:42	5.63326	107.908	1
2022-09-14	10:44:43	6.95661	114.865	1
2022-09-14	10:44:44	5.05244	119.917	1
2022-09-14	10:44:45	1.33225	121.249	1
2022-09-14	10:44:46	0.0242227	121.273	1
2022-09-14	10:44:47	0.145916	121.419	1
2022-09-14	10:44:48	-0.425182	121.419	1
2022-09-14	10:44:49	-0.0112604	121.419	1
2022-09-14	10:44:50	-0.169834	121.419	1
2022-09-14	10:44:51	-0.394205	121.419	1
2022-09-14	10:44:52	4.65454	126.074	1
2022-09-14	10:44:53	7.28243	133.356	1
2022-09-14	10:44:54	4.00147	137.358	1
2022-09-14	10:44:55	1.11199	138.47	1
2022-09-14	10:44:56	0.807468	139.277	1
2022-09-14	10:44:57	-0.197225	139.277	1
2022-09-14	10:44:58	-0.118731	139.277	1
2022-09-14	10:44:59	0.991867	140.269	1
2022-09-14	10:45:00	2.6516	142.921	1
2022-09-14	10:45:01	3.51736	146.438	1
2022-09-14	10:45:02	3.60123	150.039	1
2022-09-14	10:45:03	-0.602844	150.039	1
2022-09-14	10:45:04	-2.24934	150.039	1
2022-09-14	10:45:05	-2.96297	150.039	1
2022-09-14	10:45:06	-3.21589	150.039	1
2022-09-14	10:45:07	-2.29671	150.039	1
2022-09-14	10:45:08	-0.459249	150.039	1
2022-09-14	10:45:09	-0.104809	150.039	1
2022-09-14	10:45:10	-0.170626	150.039	1
2022-09-14	10:45:11	1.44617	151.485	1
2022-09-14	10:45:12	1.16828	152.654	1
2022-09-14	10:45:13	3.28618	155.94	1
2022-09-14	10:45:14	7.12742	163.067	1
2022-09-14	10:45:15	4.16422	167.232	1
2022-09-14	10:45:16	2.92636	170.158	1
2022-09-14	10:45:17	2.80491	172.963	1
2022-09-14	10:45:18	3.80186	176.765	1
2022-09-14	10:45:19	3.2786	180.043	1
2022-09-14	10:45:20	2.79242	182.836	1
2022-09-14	10:45:21	6.25618	189.092	1
2022-09-14	10:45:22	4.33128	193.423	1
2022-09-14	10:45:23	2.03225	195.455	1
2022-09-14	10:45:24	2.39356	197.849	1
2022-09-14	10:45:25	3.15584	201.005	1
2022-09-14	10:45:26	3.06337	204.068	1
2022-09-14	10:45:27	2.97809	207.046	1
2022-09-14	10:45:28	2.73281	209.779	1
2022-09-14	10:45:29	2.31946	212.099	1
2022-09-14	10:45:30	0.648895	212.747	1
2022-09-14	10:45:31	1.73055	214.478	1
2022-09-14	10:45:32	2.67894	217.157	1
2022-09-14	10:45:33	5.21508	222.372	1
2022-09-14	10:45:34	9.8045	232.177	1
2022-09-14	10:45:35	7.14009	239.317	1
2022-09-14	10:45:36	6.29825	245.615	1
2022-09-14	10:45:37	9.68887	255.304	1
2022-09-14	10:45:38	17.8924	273.196	2
2022-09-14	10:45:39	7.35737	280.554	2
2022-09-14	10:45:40	9.89037	290.444	2
2022-09-14	10:45:41	4.53043	294.974	2
2022-09-14	10:45:42	4.00338	298.978	2
2022-09-14	10:45:43	4.2323	303.21	2
2022-09-14	10:45:44	4.69932	307.909	2
2022-09-14	10:45:45	4.15997	312.069	2
2022-09-14	10:45:46	2.44962	314.519	2
2022-09-14	10:45:47	6.18096	320.7	2
2022-09-14	10:45:48	8.31146	329.011	2
2022-09-14	10:45:49	6.68299	335.694	2
2022-09-14	10:45:50	6.904	342.598	2
2022-09-14	10:45:51	7.11808	349.716	2
2022-09-14	10:45:52	7.70217	357.419	2
2022-09-14	10:45:53	5.89484	363.313	2
2022-09-14	10:45:54	4.55346	367.867	2
2022-09-14	10:45:55	4.57266	372.439	2
2022-09-14	10:45:56	1.86955	374.309	2
2022-09-14	10:45:57	-0.747725	374.309	2
2022-09-14	10:45:58	-0.875548	374.309	2
2022-09-14	10:45:59	-3.00808	374.309	2
2022-09-14	10:46:00	-3.20417	374.309	2
2022-09-14	10:46:01	-3.68029	374.309	2
2022-09-14	10:46:02	-3.32919	374.309	2
2022-09-14	10:46:03	-1.61063	374.309	2
2022-09-14	10:46:04	1.03571	375.345	2
2022-09-14	10:46:05	3.34281	378.688	2
2022-09-14	10:46:06	1.53865	380.226	2
2022-09-14	10:46:07	0.898073	381.124	2
2022-09-14	10:46:08	0.654271	381.779	2
2022-09-14	10:46:09	0.441482	382.22	2
2022-09-14	10:46:10	0.0592538	382.279	2
2022-09-14	10:46:11	0.0170928	382.296	2
2022-09-14	10:46:12	1.3185	383.615	2
2022-09-14	10:46:13	2.86222	386.477	2
2022-09-14	10:46:14	3.0649	389.542	2
2022-09-14	10:46:15	2.50242	392.044	2
2022-09-14	10:46:16	2.39077	394.435	2
2022-09-14	10:46:17	2.35251	396.788	2
2022-09-14	10:46:18	8.91801	405.706	2
2022-09-14	10:46:19	8.03375	413.739	2
2022-09-14	10:46:20	17.7573	431.497	3
2022-09-14	10:46:21	11.9598	443.457	3
2022-09-14	10:46:22	9.95594	453.412	3
2022-09-14	10:46:23	6.82104	460.233	3
2022-09-14	10:46:24	6.38441	466.618	3
2022-09-14	10:46:25	9.96311	476.581	3
2022-09-14	10:46:26	5.69571	482.277	3
2022-09-14	10:46:27	5.85555	488.132	3
2022-09-14	10:46:28	5.87179	494.004	3
2022-09-14	10:46:29	3.73179	497.736	3
2022-09-14	10:46:30	0.134371	497.87	3
2022-09-14	10:46:31	-1.03452	497.87	3
2022-09-14	10:46:32	-1.2378	497.87	3
2022-09-14	10:46:33	4.84356	502.714	3
2022-09-14	10:46:34	1.92369	504.637	3
2022-09-14	10:46:35	0.9747	505.612	3
2022-09-14	10:46:36	0.791678	506.404	3
2022-09-14	10:46:37	2.9744	509.378	3
2022-09-14	10:46:38	3.00801	512.386	3
2022-09-14	10:46:39	3.27214	515.658	3
2022-09-14	10:46:40	3.80796	519.466	3
2022-09-14	10:46:41	1.51827	520.985	3
2022-09-14	10:46:42	10.066	531.051	3
2022-09-14	10:46:43	5.94435	536.995	3
2022-09-14	10:46:44	2.02784	539.023	3
2022-09-14	10:46:45	1.76236	540.785	3
2022-09-14	10:46:46	2.52938	543.315	3
2022-09-14	10:46:47	2.75437	546.069	3
2022-09-14	10:46:48	2.88777	548.957	3
2022-09-14	10:46:49	2.47198	551.429	3
2022-09-14	10:46:50	2.28279	553.711	3
2022-09-14	10:46:51	1.52812	555.24	3
2022-09-14	10:46:52	1.5022	556.742	3
2022-09-14	10:46:53	1.34861	558.09	3
2022-09-14	10:46:54	1.71354	559.804	3
2022-09-14	10:46:55	1.49247	561.296	3
2022-09-14	10:46:56	1.58138	562.878	3
2022-09-14	10:46:57	1.44521	564.323	3
2022-09-14	10:46:58	4.99862	569.322	3
2022-09-14	10:46:59	4.84486	574.166	3
2022-09-14	10:47:00	3.98985	578.156	3
2022-09-14	10:47:01	4.36869	582.525	3
2022-09-14	10:47:02	2.87067	585.396	3
2022-09-14	10:47:03	1.52497	586.921	3
2022-09-14	10:47:04	1.5425	588.463	3
2022-09-14	10:47:05	2.19807	590.661	3
2022-09-14	10:47:06	4.03513	594.696	3
2022-09-14	10:47:07	3.15545	597.852	3
2022-09-14	10:47:08	3.16422	601.016	3
2022-09-14	10:47:09	3.03276	604.049	3
2022-09-14	10:47:10	3.24107	607.29	3
2022-09-14	10:47:11	3.25769	610.547	3
2022-09-14	10:47:12	3.21465	613.762	3
2022-09-14	10:47:13	1.87781	615.64	3
2022-09-14	10:47:14	-0.0176562	615.64	3
2022-09-14	10:47:15	-2.09727	615.64	3
2022-09-14	10:47:16	7.58397	623.224	3
2022-09-14	10:47:17	5.54129	628.765	3
2022-09-14	10:47:18	3.19065	631.956	3
2022-09-14	10:47:19	3.25981	635.216	3
2022-09-14	10:47:20	3.26122	638.477	3
2022-09-14	10:47:21	2.98239	641.459	3
2022-09-14	10:47:22	3.69263	645.152	3
2022-09-14	10:47:23	4.56907	649.721	3
2022-09-14	10:47:24	3.28159	653.003	3
2022-09-14	10:47:25	3.03128	656.034	3
2022-09-14	10:47:26	3.2626	659.296	3
2022-09-14	10:47:27	3.25584	662.552	3
2022-09-14	10:47:28	3.27548	665.828	3
2022-09-14	10:47:29	2.44074	668.269	3
2022-09-14	10:47:30	3.00293	671.271	3
2022-09-14	10:47:31	-3.32087	671.271	3
2022-09-14	10:47:32	-3.96401	671.271	3
2022-09-14	10:47:33	1.22699	672.498	3
2022-09-14	10:47:34	5.78085	678.279	3
2022-09-14	10:47:35	1.22897	679.508	3
2022-09-14	10:47:36	-0.552967	679.508	3
2022-09-14	10:47:37	-1.04238	679.508	3
2022-09-14	10:47:38	1.48307	680.991	3
2022-09-14	10:47:39	3.16252	684.154	3
2022-09-14	10:47:40	3.18473	687.339	3
2022-09-14	10:47:41	8.59142	695.93	3
2022-09-14	10:47:42	21.549	717.479	4
2022-09-14	10:47:43	12.9272	730.406	4
2022-09-14	10:47:44	2.68897	733.095	4
2022-09-14	10:47:45	3.2898	736.385	4
2022-09-14	10:47:46	3.27231	739.657	4
2022-09-14	10:47:47	3.26501	742.922	4
2022-09-14	10:47:48	3.26365	746.186	4
2022-09-14	10:47:49	3.26597	749.452	4
2022-09-14	10:47:50	3.27254	752.724	4
2022-09-14	10:47:51	3.2679	755.992	4
2022-09-14	10:47:52	3.26795	759.26	4
2022-09-14	10:47:53	3.32562	762.586	4
2022-09-14	10:47:54	3.09178	765.678	4
2022-09-14	10:47:55	2.81227	768.49	4
2022-09-14	10:47:56	3.26848	771.758	4
2022-09-14	10:47:57	2.72698	774.485	4
2022-09-14	10:47:58	3.04628	777.532	4
2022-09-14	10:47:59	3.05432	780.586	4
2022-09-14	10:48:00	2.85822	783.444	4
2022-09-14	10:48:01	3.14375	786.588	4
2022-09-14	10:48:02	3.11232	789.7	4
2022-09-14	10:48:03	2.8155	792.516	4
2022-09-14	10:48:04	2.51782	795.034	4
2022-09-14	10:48:05	2.68663	797.72	4
2022-09-14	10:48:06	2.61318	800.333	4
2022-09-14	10:48:07	2.47967	802.813	4
2022-09-14	10:48:08	2.47226	805.285	4
2022-09-14	10:48:09	4.64045	809.926	4
2022-09-14	10:48:10	13.2672	823.193	5
2022-09-14	10:48:11	2.26292	825.456	5
2022-09-14	10:48:12	9.93965	835.396	5
2022-09-14	10:48:13	2.67026	838.066	5
2022-09-14	10:48:14	13.3615	851.427	6
2022-09-14	10:48:15	18.074	869.501	7
2022-09-14	10:48:16	7.42493	876.926	7
2022-09-14	10:48:17	5.9971	882.923	7
2022-09-14	10:48:18	2.90848	885.832	7
2022-09-14	10:48:19	-0.169155	885.832	7
2022-09-14	10:48:20	1.49751	887.329	7
2022-09-14	10:48:21	-3.05037	887.329	7
2022-09-14	10:48:22	-3.32358	887.329	7
2022-09-14	10:48:23	-4.3478	887.329	7
2022-09-14	10:48:24	-0.432029	887.329	7
2022-09-14	10:48:25	-2.74145	887.329	7
2022-09-14	10:48:26	-2.99585	887.329	7
2022-09-14	10:48:27	-2.86524	887.329	7
2022-09-14	10:48:28	-3.07073	887.329	7
2022-09-14	10:48:29	-3.37474	887.329	7
2022-09-14	10:48:30	-3.42283	887.329	7
2022-09-14	10:48:31	-4.16959	887.329	7
2022-09-14	10:48:32	-5.24965	887.329	7
2022-09-14	10:48:33	-5.26874	887.329	7
2022-09-14	10:48:34	-4.11711	887.329	7
2022-09-14	10:48:35	-4.27706	887.329	7
2022-09-14	10:48:36	-1.15036	887.329	7
2022-09-14	10:48:37	-2.91227	887.329	7
2022-09-14	10:48:38	-4.46535	887.329	7
2022-09-14	10:48:39	-3.39551	887.329	7
2022-09-14	10:48:40	3.5667	890.896	7
2022-09-14	10:48:41	2.18878	893.085	7
2022-09-14	10:48:42	-5.35175	893.085	7
2022-09-14	10:48:43	-5.3808	893.085	7
2022-09-14	10:48:44	-5.29607	893.085	7
2022-09-14	10:48:45	4.79443	897.879	7
2022-09-14	10:48:46	12.4994	910.379	7
2022-09-14	10:48:47	16.1967	926.575	8
2022-09-14	10:48:48	2.49348	929.069	8
2022-09-14	10:48:49	3.08001	932.149	8
2022-09-14	10:48:50	2.08749	934.236	8
2022-09-14	10:48:51	1.37745	935.614	8
2022-09-14	10:48:52	0.55031	936.164	8
2022-09-14	10:48:53	1.57458	937.739	8
2022-09-14	10:48:54	1.51759	939.256	8
2022-09-14	10:48:55	3.01435	942.271	8
2022-09-14	10:48:56	5.50438	947.775	8
2022-09-14	10:48:57	2.91929	950.694	8
2022-09-14	10:48:58	5.98113	956.675	8
2022-09-14	10:48:59	2.36798	959.043	8
2022-09-14	10:49:00	1.57085	960.614	8
2022-09-14	10:49:01	1.42761	962.042	8
2022-09-14	10:49:02	1.70226	963.744	8
2022-09-14	10:49:03	1.8311	965.575	8
2022-09-14	10:49:04	1.67639	967.252	8
2022-09-14	10:49:05	1.75211	969.004	8
2022-09-14	10:49:06	2.01929	971.023	8
2022-09-14	10:49:07	2.09407	973.117	8

## Sheet: Ursula_martin_2022914104350 (4)
Date	Time	Lbs	Newtons	Averaged Newtons	Total force x time		total steps > 13.345	**GoPro Fitting: 1032
2022-09-14	10:44:07	1.30709	5.8142	12.7144	5.8142	FALSE	0
2022-09-14	10:44:07	1.43528	6.38441	12.7144	6.38441	FALSE	0
2022-09-14	10:44:07	3.94719	17.5579	12.7144	23.3721	1	1
2022-09-14	10:44:07	4.74372	21.101	12.7144	27.4854	1	2
2022-09-14	10:44:08	1.86866	8.31217	7.3281	31.6843	FALSE	2
2022-09-14	10:44:08	2.14052	9.52146	7.3281	37.0069	FALSE	2
2022-09-14	10:44:08	1.47401	6.55669	7.3281	38.241	FALSE	2
2022-09-14	10:44:08	1.10653	4.92207	7.3281	41.929	FALSE	2
2022-09-14	10:44:09	0.470344	2.09218	1.13791	40.3331	FALSE	2
2022-09-14	10:44:09	0.236501	1.052	1.13791	42.981	FALSE	2
2022-09-14	10:44:09	0.121387	0.539954	1.13791	40.8731	FALSE	2
2022-09-14	10:44:09	0.195026	0.867515	1.13791	43.8485	FALSE	2
2022-09-14	10:44:10	0.109071	0.48517	1.0474	41.3583	FALSE	2
2022-09-14	10:44:10	0.0843895	0.375381	1.0474	44.2239	FALSE	2
2022-09-14	10:44:10	0.512939	2.28166	1.0474	43.6399	FALSE	2
2022-09-14	10:44:11	0.620573	2.76043	2.64079	46.9843	FALSE	2
2022-09-14	10:44:11	0.554364	2.46592	2.64079	46.1058	FALSE	2
2022-09-14	10:44:11	0.663371	2.95081	2.64079	49.9351	FALSE	2
2022-09-14	10:44:11	0.5364	2.38601	2.64079	48.4919	FALSE	2
2022-09-14	10:44:12	0.623982	2.7756	1.64634	52.7107	FALSE	2
2022-09-14	10:44:12	0.315992	1.4056	1.64634	49.8974	FALSE	2
2022-09-14	10:44:12	0.247239	1.09977	1.64634	53.8105	FALSE	2
2022-09-14	10:44:12	0.293244	1.30441	1.64634	51.2019	FALSE	2
2022-09-14	10:44:13	0.100064	0.445105	0.907882	54.2556	FALSE	2
2022-09-14	10:44:13	0.336654	1.4975	0.907882	52.6994	FALSE	2
2022-09-14	10:44:13	0.175585	0.781037	0.907882	55.0366	FALSE	2
2022-09-14	10:44:14	0.346018	1.53916	2.11346	54.2385	FALSE	2
2022-09-14	10:44:14	0.178893	0.795752	2.11346	55.8324	FALSE	2
2022-09-14	10:44:14	0.375433	1.67	2.11346	55.9085	FALSE	2
2022-09-14	10:44:14	1.00016	4.44891	2.11346	60.2813	FALSE	2
2022-09-14	10:44:15	0.556959	2.47747	1.45291	58.386	FALSE	2
2022-09-14	10:44:15	0.747443	3.32478	1.45291	63.606	FALSE	2
2022-09-14	10:44:15	0.649631	2.88969	1.45291	61.2757	FALSE	2
2022-09-14	10:44:15	-0.647518	-2.88029	1.45291	63.606	FALSE	2
2022-09-14	10:44:16	-0.452913	-2.01465	1.45636	61.2757	FALSE	2
2022-09-14	10:44:16	0.263575	1.17243	1.45636	64.7785	FALSE	2
2022-09-14	10:44:16	0.926527	4.12138	1.45636	65.397	FALSE	2
2022-09-14	10:44:16	0.57243	2.54628	1.45636	67.3248	FALSE	2
2022-09-14	10:44:17	0.461183	2.05143	1.82229	67.4485	FALSE	2
2022-09-14	10:44:17	0.249835	1.11132	1.82229	68.4361	FALSE	2
2022-09-14	10:44:17	0.561285	2.49671	1.82229	69.9452	FALSE	2
2022-09-14	10:44:17	0.366374	1.6297	1.82229	70.0658	FALSE	2
2022-09-14	10:44:18	0.457774	2.03627	1.9925	71.9815	FALSE	2
2022-09-14	10:44:18	0.423168	1.88234	1.9925	71.9481	FALSE	2
2022-09-14	10:44:18	0.462863	2.05891	1.9925	74.0404	FALSE	2
2022-09-14	10:44:19	0.353804	1.57379	1.76576	73.5219	FALSE	2
2022-09-14	10:44:19	0.340573	1.51494	1.76576	75.5553	FALSE	2
2022-09-14	10:44:19	0.453092	2.01544	1.76576	75.5374	FALSE	2
2022-09-14	10:44:19	0.440369	1.95885	1.76576	77.5142	FALSE	2
2022-09-14	10:44:20	0.467647	2.08019	2.30373	77.6175	FALSE	2
2022-09-14	10:44:20	0.493193	2.19382	2.30373	79.708	FALSE	2
2022-09-14	10:44:20	0.459809	2.04532	2.30373	79.6629	FALSE	2
2022-09-14	10:44:20	0.650954	2.89557	2.30373	82.6035	FALSE	2
2022-09-14	10:44:21	3.49136	15.5303	4.71537	95.1931	1	3
2022-09-14	10:44:21	0.335178	1.49094	4.71537	84.0945	FALSE	3
2022-09-14	10:44:21	0.19472	0.866154	4.71537	96.0593	FALSE	3
2022-09-14	10:44:21	0.218995	0.974134	4.71537	85.0686	FALSE	3
2022-09-14	10:44:22	0.31584	1.40492	1.56942	97.4642	FALSE	3
2022-09-14	10:44:22	0.358639	1.5953	1.56942	86.6639	FALSE	3
2022-09-14	10:44:22	0.383982	1.70803	1.56942	99.1722	FALSE	3
2022-09-14	10:44:23	0.347596	1.54618	4.20576	88.2101	FALSE	3
2022-09-14	10:44:23	0.523575	2.32897	4.20576	101.501	FALSE	3
2022-09-14	10:44:23	1.14246	5.08189	4.20576	93.292	FALSE	3
2022-09-14	10:44:23	1.76836	7.86602	4.20576	109.367	FALSE	3
2022-09-14	10:44:24	1.30831	5.81962	3.63615	99.1116	FALSE	3
2022-09-14	10:44:24	0.614262	2.73236	3.63615	112.1	FALSE	3
2022-09-14	10:44:24	0.611768	2.72127	3.63615	101.833	FALSE	3
2022-09-14	10:44:24	0.735433	3.27135	3.63615	115.371	FALSE	3
2022-09-14	10:44:25	0.376094	1.67294	1.5301	103.506	FALSE	3
2022-09-14	10:44:25	0.374771	1.66706	1.5301	117.038	FALSE	3
2022-09-14	10:44:25	0.439708	1.95591	1.5301	105.462	FALSE	3
2022-09-14	10:44:25	0.185356	0.824501	1.5301	117.862	FALSE	3
2022-09-14	10:44:26	0.205153	0.912562	0.873626	106.374	FALSE	3
2022-09-14	10:44:26	0.23411	1.04137	0.873626	118.904	FALSE	3
2022-09-14	10:44:26	0.149937	0.66695	0.873626	107.041	FALSE	3
2022-09-14	10:44:27	0.292481	1.30101	0.936613	120.205	FALSE	3
2022-09-14	10:44:27	0.190089	0.845554	0.936613	107.887	FALSE	3
2022-09-14	10:44:27	0.174059	0.774249	0.936613	120.979	FALSE	3
2022-09-14	10:44:27	0.185611	0.825635	0.936613	108.712	FALSE	3
2022-09-14	10:44:28	0.170293	0.757497	0.929823	121.737	FALSE	3
2022-09-14	10:44:28	0.300624	1.33724	0.929823	110.05	FALSE	3
2022-09-14	10:44:28	0.111362	0.49536	0.929823	122.232	FALSE	3
2022-09-14	10:44:28	0.253855	1.1292	0.929823	111.179	FALSE	3
2022-09-14	10:44:29	0.0944149	0.419976	0.769494	122.652	FALSE	3
2022-09-14	10:44:29	0.294262	1.30894	0.769494	112.488	FALSE	3
2022-09-14	10:44:29	0.0455091	0.202434	0.769494	122.854	FALSE	3
2022-09-14	10:44:29	0.257774	1.14663	0.769494	113.634	FALSE	3
2022-09-14	10:44:30	0.148359	0.659931	0.980868	123.514	FALSE	3
2022-09-14	10:44:30	0.260115	1.15704	0.980868	114.791	FALSE	3
2022-09-14	10:44:30	0.175992	0.782848	0.980868	124.297	FALSE	3
2022-09-14	10:44:30	0.29757	1.32365	0.980868	116.115	FALSE	3
2022-09-14	10:44:31	0.159097	0.707695	0.588095	125.005	FALSE	3
2022-09-14	10:44:31	0.099962	0.444651	0.588095	116.56	FALSE	3
2022-09-14	10:44:31	0.13757	0.611939	0.588095	125.617	FALSE	3
2022-09-14	10:44:32	0.213448	0.949459	1.28726	117.509	FALSE	3
2022-09-14	10:44:32	0.406832	1.80967	1.28726	127.426	FALSE	3
2022-09-14	10:44:32	0.18383	0.817713	1.28726	118.327	FALSE	3
2022-09-14	10:44:32	0.353448	1.57221	1.28726	128.999	FALSE	3
2022-09-14	10:44:33	0.14673	0.652684	0.861457	118.98	FALSE	3
2022-09-14	10:44:33	0.35645	1.58556	0.861457	130.584	FALSE	3
2022-09-14	10:44:33	0.0461707	0.205377	0.861457	119.185	FALSE	3
2022-09-14	10:44:33	0.225306	1.00221	0.861457	131.586	FALSE	3
2022-09-14	10:44:34	0.181336	0.806619	0.553479	119.992	FALSE	3
2022-09-14	10:44:34	0.191463	0.851666	0.553479	132.438	FALSE	3
2022-09-14	10:44:34	0.0154837	0.0688746	0.553479	120.061	FALSE	3
2022-09-14	10:44:34	0.109428	0.486758	0.553479	132.925	FALSE	3
2022-09-14	10:44:35	0.0619468	0.275552	-0.187755	120.336	FALSE	3
2022-09-14	10:44:35	-0.0534221	-0.237632	-0.187755	132.925	FALSE	3
2022-09-14	10:44:35	-0.135152	-0.601183	-0.187755	120.336	FALSE	3
2022-09-14	10:44:36	-0.0356104	-0.158402	-1.15896	132.925	FALSE	3
2022-09-14	10:44:36	-0.211895	-0.942551	-1.15896	120.336	FALSE	3
2022-09-14	10:44:36	-0.314745	-1.40005	-1.15896	132.925	FALSE	3
2022-09-14	10:44:36	-0.479936	-2.13485	-1.15896	120.336	FALSE	3
2022-09-14	10:44:37	-0.264058	-1.17458	-0.536838	132.925	FALSE	3
2022-09-14	10:44:37	-0.212048	-0.943232	-0.536838	120.336	FALSE	3
2022-09-14	10:44:37	0.011616	0.0516703	-0.536838	132.977	FALSE	3
2022-09-14	10:44:37	-0.0182567	-0.0812095	-0.536838	120.336	FALSE	3
2022-09-14	10:44:38	0.340115	1.5129	8.36053	134.489	FALSE	3
2022-09-14	10:44:38	1.06999	4.75953	8.36053	125.096	FALSE	3
2022-09-14	10:44:38	2.25284	10.0211	8.36053	144.511	FALSE	3
2022-09-14	10:44:38	3.85518	17.1486	8.36053	142.244	1	4
2022-09-14	10:44:39	3.96393	17.6324	16.6562	162.143	1	5
2022-09-14	10:44:39	3.41548	15.1927	16.6562	157.437	1	6
2022-09-14	10:44:39	3.85406	17.1436	16.6562	179.287	1	7
2022-09-14	10:44:40	2.268	10.0885	7.65164	167.525	FALSE	7
2022-09-14	10:44:40	1.89365	8.42333	7.65164	187.71	FALSE	7
2022-09-14	10:44:40	1.51238	6.72737	7.65164	174.253	FALSE	7
2022-09-14	10:44:40	1.20663	5.36733	7.65164	193.077	FALSE	7
2022-09-14	10:44:41	1.33716	5.94796	5.8389	180.201	FALSE	7
2022-09-14	10:44:41	1.25843	5.59775	5.8389	198.675	FALSE	7
2022-09-14	10:44:41	1.43996	6.40523	5.8389	186.606	FALSE	7
2022-09-14	10:44:41	1.21502	5.40465	5.8389	204.08	FALSE	7
2022-09-14	10:44:42	1.21655	5.41146	5.63326	192.017	FALSE	7
2022-09-14	10:44:42	1.29177	5.74605	5.63326	209.826	FALSE	7
2022-09-14	10:44:42	1.26042	5.6066	5.63326	197.624	FALSE	7
2022-09-14	10:44:42	1.29691	5.76892	5.63326	215.595	FALSE	7
2022-09-14	10:44:43	1.34719	5.99257	6.95661	203.617	FALSE	7
2022-09-14	10:44:43	1.31467	5.84792	6.95661	221.442	FALSE	7
2022-09-14	10:44:43	2.02989	9.02936	6.95661	212.646	FALSE	7
2022-09-14	10:44:44	1.60637	7.14546	5.05244	228.588	FALSE	7
2022-09-14	10:44:44	1.7105	7.60865	5.05244	220.255	FALSE	7
2022-09-14	10:44:44	0.804593	3.57899	5.05244	232.167	FALSE	7
2022-09-14	10:44:44	0.421896	1.87668	5.05244	222.131	FALSE	7
2022-09-14	10:44:45	0.291361	1.29603	1.33225	233.463	FALSE	7
2022-09-14	10:44:45	0.370089	1.64623	1.33225	223.778	FALSE	7
2022-09-14	10:44:45	0.386272	1.71822	1.33225	235.181	FALSE	7
2022-09-14	10:44:45	0.150293	0.668533	1.33225	224.446	FALSE	7
2022-09-14	10:44:46	-0.116068	-0.516294	0.0242227	235.181	FALSE	7
2022-09-14	10:44:46	-0.175458	-0.780472	0.0242227	224.446	FALSE	7
2022-09-14	10:44:46	-0.202379	-0.900222	0.0242227	235.181	FALSE	7
2022-09-14	10:44:46	0.515687	2.29388	0.0242227	226.74	FALSE	7
2022-09-14	10:44:47	0.29243	1.30079	0.145916	236.482	FALSE	7
2022-09-14	10:44:47	-0.131692	-0.585792	0.145916	226.74	FALSE	7
2022-09-14	10:44:47	-0.062328	-0.277247	0.145916	236.482	FALSE	7
2022-09-14	10:44:48	-0.231336	-1.02903	-0.425182	226.74	FALSE	7
2022-09-14	10:44:48	-0.033015	-0.146857	-0.425182	236.482	FALSE	7
2022-09-14	10:44:48	-0.150216	-0.668191	-0.425182	226.74	FALSE	7
2022-09-14	10:44:48	0.0322267	0.143351	-0.425182	236.625	FALSE	7
2022-09-14	10:44:49	-0.15047	-0.669321	-0.0112604	226.74	FALSE	7
2022-09-14	10:44:49	0.064186	0.285512	-0.0112604	236.911	FALSE	7
2022-09-14	10:44:49	-0.0238038	-0.105884	-0.0112604	226.74	FALSE	7
2022-09-14	10:44:49	0.099962	0.444651	-0.0112604	237.355	FALSE	7
2022-09-14	10:44:50	-0.134389	-0.597789	-0.169834	226.74	FALSE	7
2022-09-14	10:44:50	0.00215038	0.00956532	-0.169834	237.365	FALSE	7
2022-09-14	10:44:50	-0.0438547	-0.195074	-0.169834	226.74	FALSE	7
2022-09-14	10:44:50	0.0233717	0.103962	-0.169834	237.469	FALSE	7
2022-09-14	10:44:51	-0.153727	-0.683808	-0.394205	226.74	FALSE	7
2022-09-14	10:44:51	0.0118705	0.0528024	-0.394205	237.522	FALSE	7
2022-09-14	10:44:51	-0.124007	-0.551608	-0.394205	226.74	FALSE	7
2022-09-14	10:44:52	-0.00426182	-0.0189574	4.65454	237.522	FALSE	7
2022-09-14	10:44:52	0.48444	2.15489	4.65454	228.895	FALSE	7
2022-09-14	10:44:52	1.72006	7.65117	4.65454	245.173	FALSE	7
2022-09-14	10:44:52	1.98531	8.83106	4.65454	237.726	FALSE	7
2022-09-14	10:44:53	2.20785	9.82096	7.28243	254.994	FALSE	7
2022-09-14	10:44:53	1.68266	7.48481	7.28243	245.211	FALSE	7
2022-09-14	10:44:53	1.45472	6.47089	7.28243	261.465	FALSE	7
2022-09-14	10:44:53	1.20342	5.35305	7.28243	250.564	FALSE	7
2022-09-14	10:44:54	0.907494	4.03671	4.00147	265.502	FALSE	7
2022-09-14	10:44:54	1.04357	4.64201	4.00147	255.206	FALSE	7
2022-09-14	10:44:54	0.747646	3.32568	4.00147	268.827	FALSE	7
2022-09-14	10:44:55	0.43126	1.91833	1.11199	257.124	FALSE	7
2022-09-14	10:44:55	0.246934	1.09841	1.11199	269.926	FALSE	7
2022-09-14	10:44:55	0.159097	0.707695	1.11199	257.832	FALSE	7
2022-09-14	10:44:55	0.162659	0.72354	1.11199	270.649	FALSE	7
2022-09-14	10:44:56	0.704593	3.13417	0.807468	260.966	FALSE	7
2022-09-14	10:44:56	0.0468832	0.208546	0.807468	270.858	FALSE	7
2022-09-14	10:44:56	-0.0163738	-0.0728339	0.807468	260.966	FALSE	7
2022-09-14	10:44:56	-0.00899467	-0.0400101	0.807468	270.858	FALSE	7
2022-09-14	10:44:57	-0.114389	-0.508825	-0.197225	260.966	FALSE	7
2022-09-14	10:44:57	-0.03673	-0.163382	-0.197225	270.858	FALSE	7
2022-09-14	10:44:57	-0.0973407	-0.432991	-0.197225	260.966	FALSE	7
2022-09-14	10:44:57	0.0711071	0.316299	-0.197225	271.174	FALSE	7
2022-09-14	10:44:58	-0.104923	-0.466718	-0.118731	260.966	FALSE	7
2022-09-14	10:44:58	0.0542623	0.24137	-0.118731	271.415	FALSE	7
2022-09-14	10:44:58	-0.104364	-0.464232	-0.118731	260.966	FALSE	7
2022-09-14	10:44:58	0.0482572	0.214658	-0.118731	271.63	FALSE	7
2022-09-14	10:44:59	0.086934	0.3867	0.991867	261.353	FALSE	7
2022-09-14	10:44:59	0.292176	1.29966	0.991867	272.93	FALSE	7
2022-09-14	10:44:59	0.289835	1.28924	0.991867	262.642	FALSE	7
2022-09-14	10:45:00	0.350802	1.56044	2.6516	274.49	FALSE	7
2022-09-14	10:45:00	0.716959	3.18918	2.6516	265.831	FALSE	7
2022-09-14	10:45:00	0.610852	2.71719	2.6516	277.207	FALSE	7
2022-09-14	10:45:00	0.705814	3.1396	2.6516	268.971	FALSE	7
2022-09-14	10:45:01	0.895331	3.98261	3.51736	281.19	FALSE	7
2022-09-14	10:45:01	0.708257	3.15047	3.51736	272.121	FALSE	7
2022-09-14	10:45:01	0.646628	2.87633	3.51736	284.066	FALSE	7
2022-09-14	10:45:01	0.912735	4.06003	3.51736	276.181	FALSE	7
2022-09-14	10:45:02	0.931005	4.1413	3.60123	288.208	FALSE	7
2022-09-14	10:45:02	1.12057	4.98452	3.60123	281.166	FALSE	7
2022-09-14	10:45:02	0.817824	3.63784	3.60123	291.845	FALSE	7
2022-09-14	10:45:02	0.36897	1.64125	3.60123	282.807	FALSE	7
2022-09-14	10:45:03	0.0438297	0.194963	-0.602844	292.04	FALSE	7
2022-09-14	10:45:03	-0.170979	-0.760549	-0.602844	282.807	FALSE	7
2022-09-14	10:45:03	-0.279427	-1.24295	-0.602844	292.04	FALSE	7
2022-09-14	10:45:04	-0.40589	-1.80548	-2.24934	282.807	FALSE	7
2022-09-14	10:45:04	-0.499732	-2.22291	-2.24934	292.04	FALSE	7
2022-09-14	10:45:04	-0.551844	-2.45471	-2.24934	282.807	FALSE	7
2022-09-14	10:45:04	-0.565228	-2.51425	-2.24934	292.04	FALSE	7
2022-09-14	10:45:05	-0.592811	-2.63694	-2.96297	282.807	FALSE	7
2022-09-14	10:45:05	-0.692251	-3.07927	-2.96297	292.04	FALSE	7
2022-09-14	10:45:05	-0.642073	-2.85607	-2.96297	282.807	FALSE	7
2022-09-14	10:45:05	-0.737289	-3.27961	-2.96297	292.04	FALSE	7
2022-09-14	10:45:06	-0.647162	-2.87871	-3.21589	282.807	FALSE	7
2022-09-14	10:45:06	-0.849147	-3.77718	-3.21589	292.04	FALSE	7
2022-09-14	10:45:06	-0.657646	-2.92534	-3.21589	282.807	FALSE	7
2022-09-14	10:45:06	-0.7379	-3.28233	-3.21589	292.04	FALSE	7
2022-09-14	10:45:07	-0.606806	-2.69919	-2.29671	282.807	FALSE	7
2022-09-14	10:45:07	-0.621005	-2.76235	-2.29671	292.04	FALSE	7
2022-09-14	10:45:07	-0.321157	-1.42857	-2.29671	282.807	FALSE	7
2022-09-14	10:45:08	-0.179834	-0.799938	-0.459249	292.04	FALSE	7
2022-09-14	10:45:08	-0.208231	-0.926253	-0.459249	282.807	FALSE	7
2022-09-14	10:45:08	-0.0103687	-0.0461221	-0.459249	292.04	FALSE	7
2022-09-14	10:45:08	-0.0145417	-0.0646844	-0.459249	282.807	FALSE	7
2022-09-14	10:45:09	0.184542	0.82088	-0.104809	292.861	FALSE	7
2022-09-14	10:45:09	-0.181768	-0.80854	-0.104809	282.807	FALSE	7
2022-09-14	10:45:09	-0.00217532	-0.00967626	-0.104809	292.861	FALSE	7
2022-09-14	10:45:09	-0.094847	-0.421898	-0.104809	282.807	FALSE	7
2022-09-14	10:45:10	-0.0365773	-0.162703	-0.170626	292.861	FALSE	7
2022-09-14	10:45:10	-0.157544	-0.700787	-0.170626	282.807	FALSE	7
2022-09-14	10:45:10	0.0193514	0.0860789	-0.170626	292.947	FALSE	7
2022-09-14	10:45:10	0.0213361	0.0949072	-0.170626	282.902	FALSE	7
2022-09-14	10:45:11	0.360725	1.60458	1.44617	294.552	FALSE	7
2022-09-14	10:45:11	0.216094	0.961229	1.44617	283.863	FALSE	7
2022-09-14	10:45:11	0.431718	1.92037	1.44617	296.472	FALSE	7
2022-09-14	10:45:11	0.291921	1.29852	1.44617	285.162	FALSE	7
2022-09-14	10:45:12	0.383422	1.70554	1.16828	298.178	FALSE	7
2022-09-14	10:45:12	0.225407	1.00266	1.16828	286.164	FALSE	7
2022-09-14	10:45:12	0.179097	0.796659	1.16828	298.974	FALSE	7
2022-09-14	10:45:13	0.542659	2.41386	3.28618	288.578	FALSE	7
2022-09-14	10:45:13	0.731819	3.25528	3.28618	302.23	FALSE	7
2022-09-14	10:45:13	0.917315	4.0804	3.28618	292.659	FALSE	7
2022-09-14	10:45:13	0.76327	3.39518	3.28618	305.625	FALSE	7
2022-09-14	10:45:14	1.15925	5.15658	7.12742	297.815	FALSE	7
2022-09-14	10:45:14	1.55497	6.91682	7.12742	312.542	FALSE	7
2022-09-14	10:45:14	1.92078	8.54401	7.12742	306.359	FALSE	7
2022-09-14	10:45:14	1.77426	7.89226	7.12742	320.434	FALSE	7
2022-09-14	10:45:15	1.42383	6.33348	4.16422	312.693	FALSE	7
2022-09-14	10:45:15	0.814109	3.62132	4.16422	324.055	FALSE	7
2022-09-14	10:45:15	0.70271	3.12579	4.16422	315.818	FALSE	7
2022-09-14	10:45:15	0.803982	3.57627	4.16422	327.632	FALSE	7
2022-09-14	10:45:16	0.712277	3.16835	2.92636	318.987	FALSE	7
2022-09-14	10:45:16	0.640827	2.85053	2.92636	330.482	FALSE	7
2022-09-14	10:45:16	0.620522	2.76021	2.92636	321.747	FALSE	7
2022-09-14	10:45:17	0.622913	2.77084	2.80491	333.253	FALSE	7
2022-09-14	10:45:17	0.647952	2.88222	2.80491	324.629	FALSE	7
2022-09-14	10:45:17	0.624542	2.77809	2.80491	336.031	FALSE	7
2022-09-14	10:45:17	0.626883	2.7885	2.80491	327.418	FALSE	7
2022-09-14	10:45:18	0.742354	3.30214	3.80186	339.333	FALSE	7
2022-09-14	10:45:18	0.78958	3.51221	3.80186	330.93	FALSE	7
2022-09-14	10:45:18	0.874059	3.88799	3.80186	343.221	FALSE	7
2022-09-14	10:45:18	1.01279	4.50509	3.80186	335.435	FALSE	7
2022-09-14	10:45:19	0.948919	4.22098	3.2786	347.442	FALSE	7
2022-09-14	10:45:19	0.736145	3.27452	3.2786	338.709	FALSE	7
2022-09-14	10:45:19	0.660166	2.93655	3.2786	350.379	FALSE	7
2022-09-14	10:45:19	0.603015	2.68233	3.2786	341.392	FALSE	7
2022-09-14	10:45:20	0.587646	2.61397	2.79242	352.993	FALSE	7
2022-09-14	10:45:20	0.586985	2.61103	2.79242	344.003	FALSE	7
2022-09-14	10:45:20	0.708664	3.15228	2.79242	356.145	FALSE	7
2022-09-14	10:45:21	1.06083	4.71878	6.25618	348.722	FALSE	7
2022-09-14	10:45:21	1.47253	6.55011	6.25618	362.695	FALSE	7
2022-09-14	10:45:21	1.62877	7.24509	6.25618	355.967	FALSE	7
2022-09-14	10:45:21	1.46368	6.51074	6.25618	369.206	FALSE	7
2022-09-14	10:45:22	1.36505	6.07202	4.33128	362.039	FALSE	7
2022-09-14	10:45:22	0.993448	4.41906	4.33128	373.625	FALSE	7
2022-09-14	10:45:22	0.774873	3.44679	4.33128	365.486	FALSE	7
2022-09-14	10:45:22	0.761488	3.38725	4.33128	377.012	FALSE	7
2022-09-14	10:45:23	0.702099	3.12308	2.03225	368.609	FALSE	7
2022-09-14	10:45:23	0.765509	3.40514	2.03225	380.417	FALSE	7
2022-09-14	10:45:23	0.173295	0.770851	2.03225	369.379	FALSE	7
2022-09-14	10:45:23	0.186578	0.829936	2.03225	381.247	FALSE	7
2022-09-14	10:45:24	0.200115	0.890152	2.39356	370.27	FALSE	7
2022-09-14	10:45:24	0.710598	3.16088	2.39356	384.408	FALSE	7
2022-09-14	10:45:24	0.703575	3.12964	2.39356	373.399	FALSE	7
2022-09-14	10:45:25	0.658791	2.93043	3.15584	387.338	FALSE	7
2022-09-14	10:45:25	0.644237	2.8657	3.15584	376.265	FALSE	7
2022-09-14	10:45:25	0.759605	3.37887	3.15584	390.717	FALSE	7
2022-09-14	10:45:25	0.775229	3.44837	3.15584	379.713	FALSE	7
2022-09-14	10:45:26	0.633448	2.8177	3.06337	393.535	FALSE	7
2022-09-14	10:45:26	0.729428	3.24464	3.06337	382.958	FALSE	7
2022-09-14	10:45:26	0.714058	3.17627	3.06337	396.711	FALSE	7
2022-09-14	10:45:26	0.677773	3.01487	3.06337	385.973	FALSE	7
2022-09-14	10:45:27	0.677773	3.01487	2.97809	399.726	FALSE	7
2022-09-14	10:45:27	0.689936	3.06897	2.97809	389.042	FALSE	7
2022-09-14	10:45:27	0.6593	2.9327	2.97809	402.659	FALSE	7
2022-09-14	10:45:27	0.651005	2.8958	2.97809	391.938	FALSE	7
2022-09-14	10:45:28	0.637722	2.83672	2.73281	405.496	FALSE	7
2022-09-14	10:45:28	0.590954	2.62868	2.73281	394.566	FALSE	7
2022-09-14	10:45:28	0.614415	2.73304	2.73281	408.229	FALSE	7
2022-09-14	10:45:29	0.616807	2.74368	2.31946	397.31	FALSE	7
2022-09-14	10:45:29	0.523626	2.32919	2.31946	410.558	FALSE	7
2022-09-14	10:45:29	0.55187	2.45483	2.31946	399.765	FALSE	7
2022-09-14	10:45:29	0.393448	1.75014	2.31946	412.308	FALSE	7
2022-09-14	10:45:30	0.400064	1.77956	0.648895	401.544	FALSE	7
2022-09-14	10:45:30	0.23986	1.06695	0.648895	413.375	FALSE	7
2022-09-14	10:45:30	0.0500893	0.222807	0.648895	401.767	FALSE	7
2022-09-14	10:45:30	-0.106501	-0.473738	0.648895	413.375	FALSE	7
2022-09-14	10:45:31	-0.144771	-0.64397	1.73055	401.767	FALSE	7
2022-09-14	10:45:31	0.621845	2.76609	1.73055	416.141	FALSE	7
2022-09-14	10:45:31	0.619555	2.7559	1.73055	404.523	FALSE	7
2022-09-14	10:45:31	0.459555	2.04419	1.73055	418.185	FALSE	7
2022-09-14	10:45:32	0.597061	2.65585	2.67894	407.179	FALSE	7
2022-09-14	10:45:32	0.747646	3.32568	2.67894	421.511	FALSE	7
2022-09-14	10:45:32	0.462049	2.05529	2.67894	409.234	FALSE	7
2022-09-14	10:45:33	0.797723	3.54843	5.21508	425.059	FALSE	7
2022-09-14	10:45:33	1.17548	5.22877	5.21508	414.463	FALSE	7
2022-09-14	10:45:33	1.09996	4.89284	5.21508	429.952	FALSE	7
2022-09-14	10:45:33	1.61645	7.19029	5.21508	421.653	FALSE	7
2022-09-14	10:45:34	1.87472	8.33913	9.8045	438.291	FALSE	7
2022-09-14	10:45:34	2.2077	9.82029	9.8045	431.474	FALSE	7
2022-09-14	10:45:34	2.85732	12.7099	9.8045	451.001	FALSE	7
2022-09-14	10:45:34	1.87686	8.34865	9.8045	439.822	FALSE	7
2022-09-14	10:45:35	1.95248	8.68502	7.14009	459.686	FALSE	7
2022-09-14	10:45:35	1.68953	7.51537	7.14009	447.338	FALSE	7
2022-09-14	10:45:35	1.44938	6.44713	7.14009	466.133	FALSE	7
2022-09-14	10:45:35	1.32927	5.91286	7.14009	453.25	FALSE	7
2022-09-14	10:45:36	1.21228	5.39246	6.29825	471.526	FALSE	7
2022-09-14	10:45:36	1.33681	5.9464	6.29825	459.197	FALSE	7
2022-09-14	10:45:36	1.69864	7.55589	6.29825	479.082	FALSE	7
2022-09-14	10:45:37	1.65212	7.34896	9.68887	466.546	FALSE	7
2022-09-14	10:45:37	2.01411	8.95916	9.68887	488.041	FALSE	7
2022-09-14	10:45:37	2.42765	10.7987	9.68887	477.344	FALSE	7
2022-09-14	10:45:37	2.61874	11.6487	9.68887	499.69	FALSE	7
2022-09-14	10:45:38	3.72189	16.5557	17.8924	493.9	1	8
2022-09-14	10:45:38	4.61034	20.5077	17.8924	520.197	1	9
2022-09-14	10:45:38	4.51258	20.0729	17.8924	513.973	1	10
2022-09-14	10:45:38	3.24474	14.4333	17.8924	534.631	1	11
2022-09-14	10:45:39	2.43996	10.8534	7.35737	524.826	FALSE	11
2022-09-14	10:45:39	1.74485	7.76144	7.35737	542.392	FALSE	11
2022-09-14	10:45:39	1.18877	5.28789	7.35737	530.114	FALSE	11
2022-09-14	10:45:39	1.24246	5.52671	7.35737	547.919	FALSE	11
2022-09-14	10:45:40	1.78622	7.94546	9.89037	538.06	FALSE	11
2022-09-14	10:45:40	2.53604	11.2808	9.89037	559.2	FALSE	11
2022-09-14	10:45:40	2.3481	10.4448	9.89037	548.505	FALSE	11
2022-09-14	10:45:41	1.47019	6.5397	4.53043	565.739	FALSE	11
2022-09-14	10:45:41	0.924236	4.11119	4.53043	552.616	FALSE	11
2022-09-14	10:45:41	0.882506	3.92556	4.53043	569.665	FALSE	11
2022-09-14	10:45:41	0.79701	3.54526	4.53043	556.161	FALSE	11
2022-09-14	10:45:42	0.896603	3.98827	4.00338	573.653	FALSE	11
2022-09-14	10:45:42	0.904746	4.02449	4.00338	560.186	FALSE	11
2022-09-14	10:45:42	0.922354	4.10282	4.00338	577.756	FALSE	11
2022-09-14	10:45:42	0.876298	3.89795	4.00338	564.084	FALSE	11
2022-09-14	10:45:43	0.786578	3.49886	4.2323	581.255	FALSE	11
2022-09-14	10:45:43	0.888104	3.95046	4.2323	568.034	FALSE	11
2022-09-14	10:45:43	1.08668	4.83377	4.2323	586.088	FALSE	11
2022-09-14	10:45:43	1.04449	4.6461	4.2323	572.68	FALSE	11
2022-09-14	10:45:44	1.03218	4.59134	4.69932	590.68	FALSE	11
2022-09-14	10:45:44	1.10475	4.91415	4.69932	577.594	FALSE	11
2022-09-14	10:45:44	1.03243	4.59246	4.69932	595.272	FALSE	11
2022-09-14	10:45:45	0.875127	3.89274	4.15997	581.487	FALSE	11
2022-09-14	10:45:45	0.964338	4.28957	4.15997	599.562	FALSE	11
2022-09-14	10:45:45	1.03289	4.5945	4.15997	586.081	FALSE	11
2022-09-14	10:45:45	0.86846	3.86308	4.15997	603.425	FALSE	11
2022-09-14	10:45:46	0.679046	3.02053	2.44962	589.102	FALSE	11
2022-09-14	10:45:46	0.522913	2.32602	2.44962	605.751	FALSE	11
2022-09-14	10:45:46	0.476298	2.11867	2.44962	591.221	FALSE	11
2022-09-14	10:45:46	0.524542	2.33327	2.44962	608.084	FALSE	11
2022-09-14	10:45:47	0.740623	3.29444	6.18096	594.515	FALSE	11
2022-09-14	10:45:47	1.01757	4.52635	6.18096	612.611	FALSE	11
2022-09-14	10:45:47	1.43187	6.36924	6.18096	600.884	FALSE	11
2022-09-14	10:45:47	2.3681	10.5338	6.18096	623.144	FALSE	11
2022-09-14	10:45:48	2.08261	9.26387	8.31146	610.148	FALSE	11
2022-09-14	10:45:48	2.04408	9.09248	8.31146	632.237	FALSE	11
2022-09-14	10:45:48	1.86765	8.30768	8.31146	618.456	FALSE	11
2022-09-14	10:45:48	1.47966	6.58182	8.31146	638.819	FALSE	11
2022-09-14	10:45:49	1.38144	6.14492	6.68299	624.601	FALSE	11
2022-09-14	10:45:49	1.73477	7.7166	6.68299	646.535	FALSE	11
2022-09-14	10:45:49	1.391	6.18745	6.68299	630.788	FALSE	11
2022-09-14	10:45:50	1.41798	6.30746	6.904	652.843	FALSE	11
2022-09-14	10:45:50	1.49187	6.63614	6.904	637.424	FALSE	11
2022-09-14	10:45:50	1.71523	7.62969	6.904	660.472	FALSE	11
2022-09-14	10:45:50	1.58327	7.0427	6.904	644.467	FALSE	11
2022-09-14	10:45:51	1.58892	7.06783	7.11808	667.54	FALSE	11
2022-09-14	10:45:51	1.65136	7.34558	7.11808	651.813	FALSE	11
2022-09-14	10:45:51	1.53268	6.81767	7.11808	674.358	FALSE	11
2022-09-14	10:45:51	1.6279	7.24122	7.11808	659.054	FALSE	11
2022-09-14	10:45:52	1.69391	7.53485	7.70217	681.893	FALSE	11
2022-09-14	10:45:52	1.75141	7.79062	7.70217	666.845	FALSE	11
2022-09-14	10:45:52	1.72179	7.65887	7.70217	689.552	FALSE	11
2022-09-14	10:45:52	1.75899	7.82434	7.70217	674.669	FALSE	11
2022-09-14	10:45:53	1.48551	6.60785	5.89484	696.159	FALSE	11
2022-09-14	10:45:53	1.34576	5.98621	5.89484	680.655	FALSE	11
2022-09-14	10:45:53	1.14439	5.09048	5.89484	701.25	FALSE	11
2022-09-14	10:45:54	1.19421	5.31208	4.55346	685.967	FALSE	11
2022-09-14	10:45:54	0.834313	3.71119	4.55346	704.961	FALSE	11
2022-09-14	10:45:54	1.09004	4.84872	4.55346	690.816	FALSE	11
2022-09-14	10:45:54	0.976094	4.34186	4.55346	709.303	FALSE	11
2022-09-14	10:45:55	1.31401	5.84498	4.57266	696.661	FALSE	11
2022-09-14	10:45:55	1.13905	5.06672	4.57266	714.37	FALSE	11
2022-09-14	10:45:55	0.869377	3.86716	4.57266	700.528	FALSE	11
2022-09-14	10:45:55	0.789479	3.51176	4.57266	717.881	FALSE	11
2022-09-14	10:45:56	0.588613	2.61827	1.86955	703.146	FALSE	11
2022-09-14	10:45:56	0.460827	2.04985	1.86955	719.931	FALSE	11
2022-09-14	10:45:56	0.38612	1.71754	1.86955	704.864	FALSE	11
2022-09-14	10:45:56	0.245611	1.09253	1.86955	721.024	FALSE	11
2022-09-14	10:45:57	0.221081	0.983413	-0.747725	705.847	FALSE	11
2022-09-14	10:45:57	-0.14528	-0.646234	-0.747725	721.024	FALSE	11
2022-09-14	10:45:57	-0.580089	-2.58035	-0.747725	705.847	FALSE	11
2022-09-14	10:45:58	0.413702	1.84023	-0.875548	722.864	FALSE	11
2022-09-14	10:45:58	-0.304262	-1.35342	-0.875548	705.847	FALSE	11
2022-09-14	10:45:58	-0.380445	-1.6923	-0.875548	722.864	FALSE	11
2022-09-14	10:45:58	-0.516323	-2.29671	-0.875548	705.847	FALSE	11
2022-09-14	10:45:59	-0.617544	-2.74696	-3.00808	722.864	FALSE	11
2022-09-14	10:45:59	-0.619732	-2.75669	-3.00808	705.847	FALSE	11
2022-09-14	10:45:59	-0.70645	-3.14243	-3.00808	722.864	FALSE	11
2022-09-14	10:45:59	-0.761259	-3.38623	-3.00808	705.847	FALSE	11
2022-09-14	10:46:00	-0.770317	-3.42652	-3.20417	722.864	FALSE	11
2022-09-14	10:46:00	-0.691895	-3.07769	-3.20417	705.847	FALSE	11
2022-09-14	10:46:00	-0.638206	-2.83887	-3.20417	722.864	FALSE	11
2022-09-14	10:46:00	-0.780903	-3.47361	-3.20417	705.847	FALSE	11
2022-09-14	10:46:01	-0.85673	-3.81091	-3.68029	722.864	FALSE	11
2022-09-14	10:46:01	-0.838205	-3.7285	-3.68029	705.847	FALSE	11
2022-09-14	10:46:01	-0.787162	-3.50145	-3.68029	722.864	FALSE	11
2022-09-14	10:46:02	-0.826908	-3.67825	-3.32919	705.847	FALSE	11
2022-09-14	10:46:02	-0.749503	-3.33394	-3.32919	722.864	FALSE	11
2022-09-14	10:46:02	-0.760241	-3.3817	-3.32919	705.847	FALSE	11
2022-09-14	10:46:02	-0.657086	-2.92285	-3.32919	722.864	FALSE	11
2022-09-14	10:46:03	-0.657493	-2.92466	-1.61063	705.847	FALSE	11
2022-09-14	10:46:03	-0.418206	-1.86026	-1.61063	722.864	FALSE	11
2022-09-14	10:46:03	-0.301666	-1.34187	-1.61063	705.847	FALSE	11
2022-09-14	10:46:03	-0.0709793	-0.31573	-1.61063	722.864	FALSE	11
2022-09-14	10:46:04	0.0339061	0.150821	1.03571	705.998	FALSE	11
2022-09-14	10:46:04	0.199046	0.885396	1.03571	723.749	FALSE	11
2022-09-14	10:46:04	0.223372	0.993603	1.03571	706.992	FALSE	11
2022-09-14	10:46:04	0.475026	2.11301	1.03571	725.862	FALSE	11
2022-09-14	10:46:05	0.5907	2.62755	3.34281	709.619	FALSE	11
2022-09-14	10:46:05	0.638842	2.8417	3.34281	728.704	FALSE	11
2022-09-14	10:46:05	1.02495	4.55918	3.34281	714.178	FALSE	11
2022-09-14	10:46:06	0.413295	1.83842	1.53865	730.543	FALSE	11
2022-09-14	10:46:06	0.430802	1.91629	1.53865	716.095	FALSE	11
2022-09-14	10:46:06	0.295789	1.31573	1.53865	731.858	FALSE	11
2022-09-14	10:46:06	0.243728	1.08415	1.53865	717.179	FALSE	11
2022-09-14	10:46:07	0.299097	1.33044	0.898073	733.189	FALSE	11
2022-09-14	10:46:07	0.14729	0.655175	0.898073	717.834	FALSE	11
2022-09-14	10:46:07	0.259962	1.15636	0.898073	734.345	FALSE	11
2022-09-14	10:46:07	0.101234	0.450309	0.898073	718.284	FALSE	11
2022-09-14	10:46:08	0.269377	1.19824	0.654271	735.543	FALSE	11
2022-09-14	10:46:08	0.0155346	0.069101	0.654271	718.353	FALSE	11
2022-09-14	10:46:08	0.238079	1.05902	0.654271	736.602	FALSE	11
2022-09-14	10:46:08	0.0653565	0.290719	0.654271	718.644	FALSE	11
2022-09-14	10:46:09	0.123779	0.550594	0.441482	737.153	FALSE	11
2022-09-14	10:46:09	0.00433869	0.0192994	0.441482	718.663	FALSE	11
2022-09-14	10:46:09	0.169631	0.754553	0.441482	737.908	FALSE	11
2022-09-14	10:46:10	0.0322267	0.143351	0.0592538	718.807	FALSE	11
2022-09-14	10:46:10	0.0816923	0.363384	0.0592538	738.271	FALSE	11
2022-09-14	10:46:10	-0.0978496	-0.435255	0.0592538	718.807	FALSE	11
2022-09-14	10:46:10	0.037214	0.165535	0.0592538	738.436	FALSE	11
2022-09-14	10:46:11	-0.0968317	-0.430727	0.0170928	718.807	FALSE	11
2022-09-14	10:46:11	0.0319723	0.142219	0.0170928	738.579	FALSE	11
2022-09-14	10:46:11	-0.0603941	-0.268645	0.0170928	718.807	FALSE	11
2022-09-14	10:46:11	0.140624	0.625524	0.0170928	739.204	FALSE	11
2022-09-14	10:46:12	0.0546694	0.24318	1.3185	719.05	FALSE	11
2022-09-14	10:46:12	0.233906	1.04046	1.3185	740.245	FALSE	11
2022-09-14	10:46:12	0.258842	1.15138	1.3185	720.201	FALSE	11
2022-09-14	10:46:12	0.638232	2.83898	1.3185	743.084	FALSE	11
2022-09-14	10:46:13	0.531667	2.36496	2.86222	722.566	FALSE	11
2022-09-14	10:46:13	0.801692	3.56609	2.86222	746.65	FALSE	11
2022-09-14	10:46:13	0.59701	2.65562	2.86222	725.222	FALSE	11
2022-09-14	10:46:14	0.586119	2.60717	3.0649	749.257	FALSE	11
2022-09-14	10:46:14	0.579402	2.5773	3.0649	727.799	FALSE	11
2022-09-14	10:46:14	0.90729	4.03581	3.0649	753.293	FALSE	11
2022-09-14	10:46:14	0.68327	3.03932	3.0649	730.839	FALSE	11
2022-09-14	10:46:15	0.557315	2.47905	2.50242	755.772	FALSE	11
2022-09-14	10:46:15	0.470496	2.09286	2.50242	732.931	FALSE	11
2022-09-14	10:46:15	0.574822	2.55692	2.50242	758.329	FALSE	11
2022-09-14	10:46:15	0.647646	2.88086	2.50242	735.812	FALSE	11
2022-09-14	10:46:16	0.593651	2.64068	2.39077	760.969	FALSE	11
2022-09-14	10:46:16	0.497061	2.21103	2.39077	738.023	FALSE	11
2022-09-14	10:46:16	0.529071	2.35341	2.39077	763.323	FALSE	11
2022-09-14	10:46:16	0.530089	2.35794	2.39077	740.381	FALSE	11
2022-09-14	10:46:17	0.50327	2.23865	2.35251	765.561	FALSE	11
2022-09-14	10:46:17	0.552277	2.45664	2.35251	742.838	FALSE	11
2022-09-14	10:46:17	0.531056	2.36224	2.35251	767.924	FALSE	11
2022-09-14	10:46:18	0.914211	4.06659	8.91801	746.904	FALSE	11
2022-09-14	10:46:18	1.77309	7.88706	8.91801	775.811	FALSE	11
2022-09-14	10:46:18	2.79207	12.4197	8.91801	759.324	FALSE	11
2022-09-14	10:46:18	2.54006	11.2987	8.91801	787.109	FALSE	11
2022-09-14	10:46:19	2.43543	10.8333	8.03375	770.157	FALSE	11
2022-09-14	10:46:19	1.69762	7.55135	8.03375	794.661	FALSE	11
2022-09-14	10:46:19	1.19996	5.33766	8.03375	775.495	FALSE	11
2022-09-14	10:46:19	1.89126	8.4127	8.03375	803.073	FALSE	11
2022-09-14	10:46:20	4.71426	20.97	17.7573	796.465	1	12
2022-09-14	10:46:20	7.18179	31.946	17.7573	835.02	1	13
2022-09-14	10:46:20	2.65925	11.8289	17.7573	808.294	FALSE	13
2022-09-14	10:46:20	1.41274	6.28415	17.7573	841.304	FALSE	13
2022-09-14	10:46:21	1.94709	8.66105	11.9598	816.955	FALSE	13
2022-09-14	10:46:21	2.98581	13.2815	11.9598	854.585	FALSE	13
2022-09-14	10:46:21	3.13314	13.9368	11.9598	830.892	1	14
2022-09-14	10:46:22	2.20765	9.82007	9.95594	864.405	FALSE	14
2022-09-14	10:46:22	2.21726	9.86282	9.95594	840.755	FALSE	14
2022-09-14	10:46:22	2.1791	9.69307	9.95594	874.098	FALSE	14
2022-09-14	10:46:22	2.34877	10.4478	9.95594	851.202	FALSE	14
2022-09-14	10:46:23	1.9505	8.67621	6.82104	882.775	FALSE	14
2022-09-14	10:46:23	1.57711	7.0153	6.82104	858.218	FALSE	14
2022-09-14	10:46:23	1.46419	6.51301	6.82104	889.288	FALSE	14
2022-09-14	10:46:23	1.14195	5.07962	6.82104	863.297	FALSE	14
2022-09-14	10:46:24	0.727748	3.23717	6.38441	892.525	FALSE	14
2022-09-14	10:46:24	1.08454	4.82425	6.38441	868.122	FALSE	14
2022-09-14	10:46:24	2.10393	9.3587	6.38441	901.883	FALSE	14
2022-09-14	10:46:24	1.8249	8.11752	6.38441	876.239	FALSE	14
2022-09-14	10:46:25	2.84032	12.6343	9.96311	914.518	FALSE	14
2022-09-14	10:46:25	2.60286	11.578	9.96311	887.817	FALSE	14
2022-09-14	10:46:25	1.82744	8.12882	9.96311	922.647	FALSE	14
2022-09-14	10:46:25	1.68861	7.51128	9.96311	895.328	FALSE	14
2022-09-14	10:46:26	1.43981	6.40456	5.69571	929.051	FALSE	14
2022-09-14	10:46:26	1.16347	5.17535	5.69571	900.504	FALSE	14
2022-09-14	10:46:26	1.23808	5.50723	5.69571	934.558	FALSE	14
2022-09-14	10:46:27	1.15131	5.12126	5.85555	905.625	FALSE	14
2022-09-14	10:46:27	1.32643	5.90023	5.85555	940.459	FALSE	14
2022-09-14	10:46:27	1.40352	6.24314	5.85555	911.868	FALSE	14
2022-09-14	10:46:27	1.38429	6.1576	5.85555	946.616	FALSE	14
2022-09-14	10:46:28	1.41111	6.2769	5.87179	918.145	FALSE	14
2022-09-14	10:46:28	1.32357	5.8875	5.87179	952.504	FALSE	14
2022-09-14	10:46:28	1.23966	5.51426	5.87179	923.659	FALSE	14
2022-09-14	10:46:28	1.30581	5.8085	5.87179	958.312	FALSE	14
2022-09-14	10:46:29	1.13416	5.04497	3.73179	928.704	FALSE	14
2022-09-14	10:46:29	1.12301	4.99537	3.73179	963.308	FALSE	14
2022-09-14	10:46:29	0.749733	3.33496	3.73179	932.039	FALSE	14
2022-09-14	10:46:29	0.348868	1.55183	3.73179	964.859	FALSE	14
2022-09-14	10:46:30	0.185	0.822917	0.134371	932.862	FALSE	14
2022-09-14	10:46:30	-0.00695905	-0.0309552	0.134371	964.859	FALSE	14
2022-09-14	10:46:30	-0.087417	-0.388848	0.134371	932.862	FALSE	14
2022-09-14	10:46:31	-0.171743	-0.763947	-1.03452	964.859	FALSE	14
2022-09-14	10:46:31	-0.277341	-1.23367	-1.03452	932.862	FALSE	14
2022-09-14	10:46:31	-0.254185	-1.13067	-1.03452	964.859	FALSE	14
2022-09-14	10:46:31	-0.22701	-1.00979	-1.03452	932.862	FALSE	14
2022-09-14	10:46:32	-0.414796	-1.8451	-1.2378	964.859	FALSE	14
2022-09-14	10:46:32	-0.434083	-1.93089	-1.2378	932.862	FALSE	14
2022-09-14	10:46:32	-0.236221	-1.05076	-1.2378	964.859	FALSE	14
2022-09-14	10:46:32	-0.0279768	-0.124446	-1.2378	932.862	FALSE	14
2022-09-14	10:46:33	-0.0588674	-0.261854	4.84356	964.859	FALSE	14
2022-09-14	10:46:33	0.594364	2.64385	4.84356	935.506	FALSE	14
2022-09-14	10:46:33	1.60195	7.12579	4.84356	971.985	FALSE	14
2022-09-14	10:46:33	2.21808	9.86646	4.84356	945.373	FALSE	14
2022-09-14	10:46:34	0.453804	2.01861	1.92369	974.004	FALSE	14
2022-09-14	10:46:34	0.441234	1.9627	1.92369	947.335	FALSE	14
2022-09-14	10:46:34	0.402354	1.78975	1.92369	975.794	FALSE	14
2022-09-14	10:46:35	0.264644	1.17719	0.9747	948.512	FALSE	14
2022-09-14	10:46:35	0.234364	1.0425	0.9747	976.836	FALSE	14
2022-09-14	10:46:35	0.22556	1.00334	0.9747	949.516	FALSE	14
2022-09-14	10:46:35	0.151921	0.675775	0.9747	977.512	FALSE	14
2022-09-14	10:46:36	0.0140078	0.0623095	0.791678	949.578	FALSE	14
2022-09-14	10:46:36	0.367697	1.63559	0.791678	979.147	FALSE	14
2022-09-14	10:46:36	0.233906	1.04046	0.791678	950.619	FALSE	14
2022-09-14	10:46:36	0.0962979	0.428352	0.791678	979.576	FALSE	14
2022-09-14	10:46:37	0.52332	2.32783	2.9744	952.946	FALSE	14
2022-09-14	10:46:37	0.484135	2.15353	2.9744	981.729	FALSE	14
2022-09-14	10:46:37	1.00581	4.47404	2.9744	957.42	FALSE	14
2022-09-14	10:46:37	0.661438	2.94221	2.9744	984.671	FALSE	14
2022-09-14	10:46:38	0.735382	3.27113	3.00801	960.692	FALSE	14
2022-09-14	10:46:38	0.559707	2.48969	3.00801	987.161	FALSE	14
2022-09-14	10:46:38	0.733601	3.2632	3.00801	963.955	FALSE	14
2022-09-14	10:46:39	0.735076	3.26977	3.27214	990.431	FALSE	14
2022-09-14	10:46:39	0.732735	3.25935	3.27214	967.214	FALSE	14
2022-09-14	10:46:39	0.73472	3.26818	3.27214	993.699	FALSE	14
2022-09-14	10:46:39	0.739911	3.29127	3.27214	970.505	FALSE	14
2022-09-14	10:46:40	0.733295	3.26184	3.80796	996.961	FALSE	14
2022-09-14	10:46:40	0.734466	3.26705	3.80796	973.772	FALSE	14
2022-09-14	10:46:40	1.71248	7.61745	3.80796	1004.58	FALSE	14
2022-09-14	10:46:40	0.244033	1.08551	3.80796	974.858	FALSE	14
2022-09-14	10:46:41	0.0237788	0.105773	1.51827	1004.68	FALSE	14
2022-09-14	10:46:41	-0.0162211	-0.0721547	1.51827	974.858	FALSE	14
2022-09-14	10:46:41	0.62215	2.76745	1.51827	1007.45	FALSE	14
2022-09-14	10:46:41	0.735585	3.27203	1.51827	978.13	FALSE	14
2022-09-14	10:46:42	1.37762	6.12793	10.066	1013.58	FALSE	14
2022-09-14	10:46:42	2.82357	12.5598	10.066	990.69	FALSE	14
2022-09-14	10:46:42	2.58759	11.5101	10.066	1025.09	FALSE	14
2022-09-14	10:46:43	2.12123	9.43566	5.94435	1000.13	FALSE	14
2022-09-14	10:46:43	1.34724	5.99279	5.94435	1031.08	FALSE	14
2022-09-14	10:46:43	1.18597	5.27543	5.94435	1005.4	FALSE	14
2022-09-14	10:46:43	0.690954	3.0735	5.94435	1034.16	FALSE	14
2022-09-14	10:46:44	0.523728	2.32965	2.02784	1007.73	FALSE	14
2022-09-14	10:46:44	0.459198	2.0426	2.02784	1036.2	FALSE	14
2022-09-14	10:46:44	0.441336	1.96315	2.02784	1009.69	FALSE	14
2022-09-14	10:46:44	0.399249	1.77594	2.02784	1037.97	FALSE	14
2022-09-14	10:46:45	0.381489	1.69694	1.76236	1011.39	FALSE	14
2022-09-14	10:46:45	0.336959	1.49886	1.76236	1039.47	FALSE	14
2022-09-14	10:46:45	0.505509	2.24861	1.76236	1013.64	FALSE	14
2022-09-14	10:46:45	0.360827	1.60503	1.76236	1041.08	FALSE	14
2022-09-14	10:46:46	0.657773	2.92591	2.52938	1016.57	FALSE	14
2022-09-14	10:46:46	0.395433	1.75897	2.52938	1042.84	FALSE	14
2022-09-14	10:46:46	0.652684	2.90327	2.52938	1019.47	FALSE	14
2022-09-14	10:46:47	0.415229	1.84702	2.75437	1044.68	FALSE	14
2022-09-14	10:46:47	0.744745	3.31277	2.75437	1022.78	FALSE	14
2022-09-14	10:46:47	0.462557	2.05755	2.75437	1046.74	FALSE	14
2022-09-14	10:46:47	0.854313	3.80016	2.75437	1026.58	FALSE	14
2022-09-14	10:46:48	0.661896	2.94425	2.88777	1049.69	FALSE	14
2022-09-14	10:46:48	0.707392	3.14662	2.88777	1029.73	FALSE	14
2022-09-14	10:46:48	0.659606	2.93406	2.88777	1052.62	FALSE	14
2022-09-14	10:46:48	0.567901	2.52614	2.88777	1032.25	FALSE	14
2022-09-14	10:46:49	0.528053	2.34889	2.47198	1054.97	FALSE	14
2022-09-14	10:46:49	0.485662	2.16032	2.47198	1034.41	FALSE	14
2022-09-14	10:46:49	0.532226	2.36745	2.47198	1057.34	FALSE	14
2022-09-14	10:46:49	0.67696	3.01125	2.47198	1037.43	FALSE	14
2022-09-14	10:46:50	0.581438	2.58635	2.28279	1059.92	FALSE	14
2022-09-14	10:46:50	0.570751	2.53881	2.28279	1039.96	FALSE	14
2022-09-14	10:46:50	0.387392	1.7232	2.28279	1061.65	FALSE	14
2022-09-14	10:46:51	0.375891	1.67204	1.52812	1041.64	FALSE	14
2022-09-14	10:46:51	0.321132	1.42846	1.52812	1063.07	FALSE	14
2022-09-14	10:46:51	0.309173	1.37526	1.52812	1043.01	FALSE	14
2022-09-14	10:46:51	0.367952	1.63672	1.52812	1064.71	FALSE	14
2022-09-14	10:46:52	0.288868	1.28494	1.5022	1044.3	FALSE	14
2022-09-14	10:46:52	0.352074	1.5661	1.5022	1066.28	FALSE	14
2022-09-14	10:46:52	0.366985	1.63242	1.5022	1045.93	FALSE	14
2022-09-14	10:46:52	0.342914	1.52535	1.5022	1067.8	FALSE	14
2022-09-14	10:46:53	0.304695	1.35534	1.34861	1047.28	FALSE	14
2022-09-14	10:46:53	0.301896	1.34289	1.34861	1069.15	FALSE	14
2022-09-14	10:46:53	0.443982	1.97492	1.34861	1049.26	FALSE	14
2022-09-14	10:46:53	0.16215	0.721276	1.34861	1069.87	FALSE	14
2022-09-14	10:46:54	0.473295	2.10531	1.71354	1051.36	FALSE	14
2022-09-14	10:46:54	0.249122	1.10814	1.71354	1070.98	FALSE	14
2022-09-14	10:46:54	0.433244	1.92716	1.71354	1053.29	FALSE	14
2022-09-14	10:46:55	0.263982	1.17424	1.49247	1072.15	FALSE	14
2022-09-14	10:46:55	0.391819	1.74289	1.49247	1055.03	FALSE	14
2022-09-14	10:46:55	0.42958	1.91086	1.49247	1074.06	FALSE	14
2022-09-14	10:46:55	0.256705	1.14188	1.49247	1056.18	FALSE	14
2022-09-14	10:46:56	0.461692	2.0537	1.58138	1076.11	FALSE	14
2022-09-14	10:46:56	0.256705	1.14188	1.58138	1057.32	FALSE	14
2022-09-14	10:46:56	0.498893	2.21918	1.58138	1078.33	FALSE	14
2022-09-14	10:46:56	0.204746	0.910751	1.58138	1058.23	FALSE	14
2022-09-14	10:46:57	0.366374	1.6297	1.44521	1079.96	FALSE	14
2022-09-14	10:46:57	0.193651	0.861398	1.44521	1059.09	FALSE	14
2022-09-14	10:46:57	0.385611	1.71527	1.44521	1081.68	FALSE	14
2022-09-14	10:46:57	0.353957	1.57447	1.44521	1060.67	FALSE	14
2022-09-14	10:46:58	0.403015	1.79269	4.99862	1083.47	FALSE	14
2022-09-14	10:46:58	0.565865	2.51708	4.99862	1063.18	FALSE	14
2022-09-14	10:46:58	1.11859	4.97571	4.99862	1088.45	FALSE	14
2022-09-14	10:46:58	2.40749	10.709	4.99862	1073.89	FALSE	14
2022-09-14	10:46:59	0.63355	2.81816	4.84486	1091.26	FALSE	14
2022-09-14	10:46:59	1.9108	8.49962	4.84486	1082.39	FALSE	14
2022-09-14	10:46:59	0.723168	3.2168	4.84486	1094.48	FALSE	14
2022-09-14	10:47:00	1.44627	6.4333	3.98985	1088.82	FALSE	14
2022-09-14	10:47:00	0.820573	3.65007	3.98985	1098.13	FALSE	14
2022-09-14	10:47:00	0.591921	2.63298	3.98985	1091.46	FALSE	14
2022-09-14	10:47:00	0.729071	3.24305	3.98985	1101.37	FALSE	14
2022-09-14	10:47:01	0.479249	2.1318	4.36869	1093.59	FALSE	14
2022-09-14	10:47:01	0.765611	3.40559	4.36869	1104.78	FALSE	14
2022-09-14	10:47:01	0.933499	4.15239	4.36869	1097.74	FALSE	14
2022-09-14	10:47:01	1.75014	7.78497	4.36869	1112.57	FALSE	14
2022-09-14	10:47:02	0.835484	3.7164	2.87067	1101.46	FALSE	14
2022-09-14	10:47:02	0.78159	3.47667	2.87067	1116.04	FALSE	14
2022-09-14	10:47:02	0.461387	2.05234	2.87067	1103.51	FALSE	14
2022-09-14	10:47:02	0.502964	2.23728	2.87067	1118.28	FALSE	14
2022-09-14	10:47:03	0.335178	1.49094	1.52497	1105	FALSE	14
2022-09-14	10:47:03	0.372125	1.65529	1.52497	1119.93	FALSE	14
2022-09-14	10:47:03	0.321183	1.42869	1.52497	1106.43	FALSE	14
2022-09-14	10:47:04	0.325865	1.44951	1.5425	1121.38	FALSE	14
2022-09-14	10:47:04	0.443677	1.97356	1.5425	1108.4	FALSE	14
2022-09-14	10:47:04	0.16897	0.751612	1.5425	1122.14	FALSE	14
2022-09-14	10:47:04	0.448562	1.99529	1.5425	1110.4	FALSE	14
2022-09-14	10:47:05	0.205713	0.915053	2.19807	1123.05	FALSE	14
2022-09-14	10:47:05	0.524848	2.33463	2.19807	1112.73	FALSE	14
2022-09-14	10:47:05	0.534618	2.37809	2.19807	1125.43	FALSE	14
2022-09-14	10:47:05	0.711412	3.1645	2.19807	1115.9	FALSE	14
2022-09-14	10:47:06	0.734924	3.26909	4.03513	1128.7	FALSE	14
2022-09-14	10:47:06	0.704084	3.13191	4.03513	1119.03	FALSE	14
2022-09-14	10:47:06	0.719453	3.20027	4.03513	1131.9	FALSE	14
2022-09-14	10:47:06	1.47009	6.53925	4.03513	1125.57	FALSE	14
2022-09-14	10:47:07	0.70388	3.131	3.15545	1135.03	FALSE	14
2022-09-14	10:47:07	0.72444	3.22245	3.15545	1128.79	FALSE	14
2022-09-14	10:47:07	0.699809	3.11289	3.15545	1138.14	FALSE	14
2022-09-14	10:47:08	0.729682	3.24577	3.16422	1132.04	FALSE	14
2022-09-14	10:47:08	0.708003	3.14934	3.16422	1141.29	FALSE	14
2022-09-14	10:47:08	0.708715	3.15251	3.16422	1135.19	FALSE	14
2022-09-14	10:47:08	0.698995	3.10927	3.16422	1144.4	FALSE	14
2022-09-14	10:47:09	0.730547	3.24962	3.03276	1138.44	FALSE	14
2022-09-14	10:47:09	0.701489	3.12036	3.03276	1147.52	FALSE	14
2022-09-14	10:47:09	0.678995	3.02031	3.03276	1141.46	FALSE	14
2022-09-14	10:47:09	0.616145	2.74074	3.03276	1150.26	FALSE	14
2022-09-14	10:47:10	0.722252	3.21272	3.24107	1144.67	FALSE	14
2022-09-14	10:47:10	0.740674	3.29467	3.24107	1153.56	FALSE	14
2022-09-14	10:47:10	0.722862	3.21543	3.24107	1147.89	FALSE	14
2022-09-14	10:47:10	0.728715	3.24147	3.24107	1156.8	FALSE	14
2022-09-14	10:47:11	0.733499	3.26275	3.25769	1151.15	FALSE	14
2022-09-14	10:47:11	0.736807	3.27746	3.25769	1160.08	FALSE	14
2022-09-14	10:47:11	0.726781	3.23287	3.25769	1154.38	FALSE	14
2022-09-14	10:47:12	0.734109	3.26546	3.21465	1163.34	FALSE	14
2022-09-14	10:47:12	0.733448	3.26252	3.21465	1157.65	FALSE	14
2022-09-14	10:47:12	0.737672	3.28131	3.21465	1166.62	FALSE	14
2022-09-14	10:47:12	0.685509	3.04928	3.21465	1160.7	FALSE	14
2022-09-14	10:47:13	0.807086	3.59008	1.87781	1170.21	FALSE	14
2022-09-14	10:47:13	0.241743	1.07532	1.87781	1161.77	FALSE	14
2022-09-14	10:47:13	0.0564506	0.251104	1.87781	1170.46	FALSE	14
2022-09-14	10:47:13	0.583321	2.59473	1.87781	1164.37	FALSE	14
2022-09-14	10:47:14	0.352328	1.56723	-0.0176562	1172.03	FALSE	14
2022-09-14	10:47:14	0.0751783	0.334408	-0.0176562	1164.7	FALSE	14
2022-09-14	10:47:14	-0.0741855	-0.329992	-0.0176562	1172.03	FALSE	14
2022-09-14	10:47:14	-0.369198	-1.64227	-0.0176562	1164.7	FALSE	14
2022-09-14	10:47:15	-0.686959	-3.05573	-2.09727	1172.03	FALSE	14
2022-09-14	10:47:15	-0.790877	-3.51798	-2.09727	1164.7	FALSE	14
2022-09-14	10:47:15	0.0633717	0.28189	-2.09727	1172.31	FALSE	14
2022-09-14	10:47:16	1.0076	4.48201	7.58397	1169.18	FALSE	14
2022-09-14	10:47:16	1.21447	5.40221	7.58397	1177.71	FALSE	14
2022-09-14	10:47:16	2.24714	9.99573	7.58397	1179.18	FALSE	14
2022-09-14	10:47:16	2.3506	10.4559	7.58397	1188.17	FALSE	14
2022-09-14	10:47:17	2.00841	8.93381	5.54129	1188.11	FALSE	14
2022-09-14	10:47:17	1.46734	6.52702	5.54129	1194.7	FALSE	14
2022-09-14	10:47:17	0.736501	3.2761	5.54129	1191.39	FALSE	14
2022-09-14	10:47:17	0.7707	3.42823	5.54129	1198.13	FALSE	14
2022-09-14	10:47:18	0.706832	3.14413	3.19065	1194.53	FALSE	14
2022-09-14	10:47:18	0.775992	3.45177	3.19065	1201.58	FALSE	14
2022-09-14	10:47:18	0.640165	2.84758	3.19065	1197.38	FALSE	14
2022-09-14	10:47:18	0.746171	3.31912	3.19065	1204.9	FALSE	14
2022-09-14	10:47:19	0.731768	3.25505	3.25981	1200.63	FALSE	14
2022-09-14	10:47:19	0.729835	3.24645	3.25981	1208.14	FALSE	14
2022-09-14	10:47:19	0.736908	3.27791	3.25981	1203.91	FALSE	14
2022-09-14	10:47:20	0.73416	3.26569	3.26122	1211.41	FALSE	14
2022-09-14	10:47:20	0.736094	3.27429	3.26122	1207.19	FALSE	14
2022-09-14	10:47:20	0.735229	3.27045	3.26122	1214.68	FALSE	14
2022-09-14	10:47:20	0.727137	3.23445	3.26122	1210.42	FALSE	14
2022-09-14	10:47:21	0.74841	3.32908	2.98239	1218.01	FALSE	14
2022-09-14	10:47:21	0.708257	3.15047	2.98239	1213.57	FALSE	14
2022-09-14	10:47:21	0.69874	3.10814	2.98239	1221.12	FALSE	14
2022-09-14	10:47:21	0.526476	2.34187	2.98239	1215.91	FALSE	14
2022-09-14	10:47:22	0.538232	2.39416	3.69263	1223.51	FALSE	14
2022-09-14	10:47:22	0.578435	2.57299	3.69263	1218.49	FALSE	14
2022-09-14	10:47:22	0.932837	4.14945	3.69263	1227.66	FALSE	14
2022-09-14	10:47:22	1.27106	5.65393	3.69263	1224.14	FALSE	14
2022-09-14	10:47:23	1.41172	6.27961	4.56907	1233.94	FALSE	14
2022-09-14	10:47:23	0.939453	4.17887	4.56907	1228.32	FALSE	14
2022-09-14	10:47:23	0.730343	3.24871	4.56907	1237.19	FALSE	14
2022-09-14	10:47:24	0.733346	3.26207	3.28159	1231.58	FALSE	14
2022-09-14	10:47:24	0.743982	3.30938	3.28159	1240.5	FALSE	14
2022-09-14	10:47:24	0.736399	3.27565	3.28159	1234.86	FALSE	14
2022-09-14	10:47:24	0.737214	3.27928	3.28159	1243.78	FALSE	14
2022-09-14	10:47:25	0.671005	2.98476	3.03128	1237.84	FALSE	14
2022-09-14	10:47:25	0.59243	2.63525	3.03128	1246.41	FALSE	14
2022-09-14	10:47:25	0.735789	3.27294	3.03128	1241.11	FALSE	14
2022-09-14	10:47:25	0.726629	3.23219	3.03128	1249.64	FALSE	14
2022-09-14	10:47:26	0.736196	3.27475	3.2626	1244.39	FALSE	14
2022-09-14	10:47:26	0.734568	3.26751	3.2626	1252.91	FALSE	14
2022-09-14	10:47:26	0.729631	3.24554	3.2626	1247.63	FALSE	14
2022-09-14	10:47:27	0.730547	3.24962	3.25584	1256.16	FALSE	14
2022-09-14	10:47:27	0.734822	3.26864	3.25584	1250.9	FALSE	14
2022-09-14	10:47:27	0.731463	3.25369	3.25584	1259.42	FALSE	14
2022-09-14	10:47:27	0.730954	3.25143	3.25584	1254.15	FALSE	14
2022-09-14	10:47:28	0.736807	3.27746	3.27548	1262.69	FALSE	14
2022-09-14	10:47:28	0.739758	3.29059	3.27548	1257.45	FALSE	14
2022-09-14	10:47:28	0.737265	3.2795	3.27548	1265.97	FALSE	14
2022-09-14	10:47:28	0.731616	3.25437	3.27548	1260.7	FALSE	14
2022-09-14	10:47:29	0.56388	2.50825	2.44074	1268.48	FALSE	14
2022-09-14	10:47:29	0.239199	1.064	2.44074	1261.76	FALSE	14
2022-09-14	10:47:29	0.664338	2.95511	2.44074	1271.44	FALSE	14
2022-09-14	10:47:29	0.727392	3.23559	2.44074	1265	FALSE	14
2022-09-14	10:47:30	0.738995	3.2872	3.00293	1274.72	FALSE	14
2022-09-14	10:47:30	0.736705	3.27701	3.00293	1268.28	FALSE	14
2022-09-14	10:47:30	0.666781	2.96598	3.00293	1277.69	FALSE	14
2022-09-14	10:47:30	0.557875	2.48154	3.00293	1270.76	FALSE	14
2022-09-14	10:47:31	-0.708383	-3.15103	-3.32087	1277.69	FALSE	14
2022-09-14	10:47:31	-0.815406	-3.62709	-3.32087	1270.76	FALSE	14
2022-09-14	10:47:31	-0.788638	-3.50802	-3.32087	1277.69	FALSE	14
2022-09-14	10:47:31	-0.673829	-2.99733	-3.32087	1270.76	FALSE	14
2022-09-14	10:47:32	-0.674643	-3.00095	-3.96401	1277.69	FALSE	14
2022-09-14	10:47:32	-0.717595	-3.19201	-3.96401	1270.76	FALSE	14
2022-09-14	10:47:32	-1.28121	-5.69908	-3.96401	1277.69	FALSE	14
2022-09-14	10:47:33	-1.60991	-7.1612	1.22699	1270.76	FALSE	14
2022-09-14	10:47:33	0.843779	3.7533	1.22699	1281.44	FALSE	14
2022-09-14	10:47:33	0.720827	3.20638	1.22699	1273.96	FALSE	14
2022-09-14	10:47:33	1.14866	5.10947	1.22699	1286.55	FALSE	14
2022-09-14	10:47:34	2.48576	11.0572	5.78085	1285.02	FALSE	14
2022-09-14	10:47:34	1.69925	7.5586	5.78085	1294.11	FALSE	14
2022-09-14	10:47:34	0.550293	2.44781	5.78085	1287.47	FALSE	14
2022-09-14	10:47:34	0.463066	2.05981	5.78085	1296.17	FALSE	14
2022-09-14	10:47:35	0.424949	1.89026	1.22897	1289.36	FALSE	14
2022-09-14	10:47:35	0.381692	1.69784	1.22897	1297.87	FALSE	14
2022-09-14	10:47:35	0.260369	1.15817	1.22897	1290.52	FALSE	14
2022-09-14	10:47:35	0.03813	0.16961	1.22897	1298.04	FALSE	14
2022-09-14	10:47:36	-0.0207504	-0.0923019	-0.552967	1290.52	FALSE	14
2022-09-14	10:47:36	-0.141157	-0.627895	-0.552967	1298.04	FALSE	14
2022-09-14	10:47:36	-0.21103	-0.938704	-0.552967	1290.52	FALSE	14
2022-09-14	10:47:37	-0.26757	-1.1902	-1.04238	1298.04	FALSE	14
2022-09-14	10:47:37	-0.244414	-1.0872	-1.04238	1290.52	FALSE	14
2022-09-14	10:47:37	-0.262531	-1.16779	-1.04238	1298.04	FALSE	14
2022-09-14	10:47:37	-0.162837	-0.724332	-1.04238	1290.52	FALSE	14
2022-09-14	10:47:38	0.00321909	0.0143192	1.48307	1298.05	FALSE	14
2022-09-14	10:47:38	0.0974684	0.433559	1.48307	1290.95	FALSE	14
2022-09-14	10:47:38	0.503066	2.23774	1.48307	1300.29	FALSE	14
2022-09-14	10:47:38	0.729886	3.24668	1.48307	1294.2	FALSE	14
2022-09-14	10:47:39	0.735178	3.27022	3.16252	1303.56	FALSE	14
2022-09-14	10:47:39	0.698638	3.10768	3.16252	1297.31	FALSE	14
2022-09-14	10:47:39	0.712786	3.17061	3.16252	1306.73	FALSE	14
2022-09-14	10:47:39	0.697265	3.10157	3.16252	1300.41	FALSE	14
2022-09-14	10:47:40	0.717417	3.19121	3.18473	1309.92	FALSE	14
2022-09-14	10:47:40	0.711056	3.16292	3.18473	1303.57	FALSE	14
2022-09-14	10:47:40	0.719402	3.20004	3.18473	1313.12	FALSE	14
2022-09-14	10:47:41	0.692888	3.0821	8.59142	1306.65	FALSE	14
2022-09-14	10:47:41	0.664491	2.95579	8.59142	1316.08	FALSE	14
2022-09-14	10:47:41	1.54246	6.86117	8.59142	1313.51	FALSE	14
2022-09-14	10:47:41	4.82591	21.4666	8.59142	1337.54	1	15
2022-09-14	10:47:42	5.27431	23.4612	21.549	1336.97	1	16
2022-09-14	10:47:42	4.27909	19.0342	21.549	1356.58	1	17
2022-09-14	10:47:42	4.4706	19.8861	21.549	1356.86	1	18
2022-09-14	10:47:42	5.3537	23.8143	21.549	1380.39	1	19
2022-09-14	10:47:43	3.12454	13.8986	12.9272	1370.76	1	20
2022-09-14	10:47:43	3.49197	15.533	12.9272	1395.93	1	21
2022-09-14	10:47:43	3.18098	14.1496	12.9272	1384.91	1	22
2022-09-14	10:47:43	1.82719	8.12771	12.9272	1404.05	FALSE	22
2022-09-14	10:47:44	0.710293	3.15953	2.68897	1388.07	FALSE	22
2022-09-14	10:47:44	0.519555	2.31108	2.68897	1406.36	FALSE	22
2022-09-14	10:47:44	0.583677	2.59631	2.68897	1390.66	FALSE	22
2022-09-14	10:47:45	0.741794	3.29965	3.2898	1409.66	FALSE	22
2022-09-14	10:47:45	0.744339	3.31097	3.2898	1393.98	FALSE	22
2022-09-14	10:47:45	0.737112	3.27882	3.2898	1412.94	FALSE	22
2022-09-14	10:47:45	0.735076	3.26977	3.2898	1397.25	FALSE	22
2022-09-14	10:47:46	0.732583	3.25868	3.27231	1416.2	FALSE	22
2022-09-14	10:47:46	0.739758	3.29059	3.27231	1400.54	FALSE	22
2022-09-14	10:47:46	0.730496	3.24939	3.27231	1419.45	FALSE	22
2022-09-14	10:47:46	0.739758	3.29059	3.27231	1403.83	FALSE	22
2022-09-14	10:47:47	0.738689	3.28584	3.26501	1422.74	FALSE	22
2022-09-14	10:47:47	0.732684	3.25912	3.26501	1407.09	FALSE	22
2022-09-14	10:47:47	0.732277	3.25731	3.26501	1425.99	FALSE	22
2022-09-14	10:47:47	0.732379	3.25777	3.26501	1410.34	FALSE	22
2022-09-14	10:47:48	0.73299	3.26049	3.26365	1429.25	FALSE	22
2022-09-14	10:47:48	0.729071	3.24305	3.26365	1413.59	FALSE	22
2022-09-14	10:47:48	0.739046	3.28742	3.26365	1432.54	FALSE	22
2022-09-14	10:47:49	0.735483	3.27158	3.26597	1416.86	FALSE	22
2022-09-14	10:47:49	0.734211	3.26592	3.26597	1435.81	FALSE	22
2022-09-14	10:47:49	0.734669	3.26795	3.26597	1420.13	FALSE	22
2022-09-14	10:47:49	0.732532	3.25845	3.26597	1439.07	FALSE	22
2022-09-14	10:47:50	0.735585	3.27203	3.27254	1423.4	FALSE	22
2022-09-14	10:47:50	0.734771	3.26841	3.27254	1442.33	FALSE	22
2022-09-14	10:47:50	0.73701	3.27837	3.27254	1426.68	FALSE	22
2022-09-14	10:47:50	0.735433	3.27135	3.27254	1445.61	FALSE	22
2022-09-14	10:47:51	0.732074	3.25641	3.2679	1429.93	FALSE	22
2022-09-14	10:47:51	0.737722	3.28154	3.2679	1448.89	FALSE	22
2022-09-14	10:47:51	0.734262	3.26614	3.2679	1433.2	FALSE	22
2022-09-14	10:47:51	0.734568	3.26751	3.2679	1452.15	FALSE	22
2022-09-14	10:47:52	0.736654	3.27678	3.26795	1436.48	FALSE	22
2022-09-14	10:47:52	0.73187	3.2555	3.26795	1455.41	FALSE	22
2022-09-14	10:47:52	0.735483	3.27158	3.26795	1439.75	FALSE	22
2022-09-14	10:47:53	0.739911	3.29127	3.32562	1458.7	FALSE	22
2022-09-14	10:47:53	0.733295	3.26184	3.32562	1443.01	FALSE	22
2022-09-14	10:47:53	0.738537	3.28516	3.32562	1461.99	FALSE	22
2022-09-14	10:47:53	0.778791	3.46422	3.32562	1446.47	FALSE	22
2022-09-14	10:47:54	0.567086	2.52251	3.09178	1464.51	FALSE	22
2022-09-14	10:47:54	0.735382	3.27113	3.09178	1449.74	FALSE	22
2022-09-14	10:47:54	0.736501	3.2761	3.09178	1467.79	FALSE	22
2022-09-14	10:47:54	0.741285	3.29738	3.09178	1453.04	FALSE	22
2022-09-14	10:47:55	0.737519	3.28063	2.81227	1471.07	FALSE	22
2022-09-14	10:47:55	0.414873	1.84544	2.81227	1454.89	FALSE	22
2022-09-14	10:47:55	0.642048	2.85596	2.81227	1473.92	FALSE	22
2022-09-14	10:47:55	0.734466	3.26705	2.81227	1458.15	FALSE	22
2022-09-14	10:47:56	0.732328	3.25754	3.26848	1477.18	FALSE	22
2022-09-14	10:47:56	0.735433	3.27135	3.26848	1461.43	FALSE	22
2022-09-14	10:47:56	0.736603	3.27656	3.26848	1480.46	FALSE	22
2022-09-14	10:47:57	0.738333	3.28425	2.72698	1464.71	FALSE	22
2022-09-14	10:47:57	0.350445	1.55885	2.72698	1482.02	FALSE	22
2022-09-14	10:47:57	0.687188	3.05675	2.72698	1467.77	FALSE	22
2022-09-14	10:47:57	0.676247	3.00808	2.72698	1485.02	FALSE	22
2022-09-14	10:47:58	0.671056	2.98499	3.04628	1470.75	FALSE	22
2022-09-14	10:47:58	0.693448	3.0846	3.04628	1488.11	FALSE	22
2022-09-14	10:47:58	0.686934	3.05562	3.04628	1473.81	FALSE	22
2022-09-14	10:47:58	0.687901	3.05992	3.04628	1491.17	FALSE	22
2022-09-14	10:47:59	0.693448	3.0846	3.05432	1476.89	FALSE	22
2022-09-14	10:47:59	0.685407	3.04883	3.05432	1494.22	FALSE	22
2022-09-14	10:47:59	0.689224	3.06581	3.05432	1479.96	FALSE	22
2022-09-14	10:47:59	0.678486	3.01804	3.05432	1497.23	FALSE	22
2022-09-14	10:48:00	0.657672	2.92546	2.85822	1482.88	FALSE	22
2022-09-14	10:48:00	0.703728	3.13032	2.85822	1500.36	FALSE	22
2022-09-14	10:48:00	0.657112	2.92297	2.85822	1485.81	FALSE	22
2022-09-14	10:48:00	0.551718	2.45415	2.85822	1502.82	FALSE	22
2022-09-14	10:48:01	0.691412	3.07554	3.14375	1488.88	FALSE	22
2022-09-14	10:48:01	0.723015	3.21612	3.14375	1506.04	FALSE	22
2022-09-14	10:48:01	0.705814	3.1396	3.14375	1492.02	FALSE	22
2022-09-14	10:48:02	0.712277	3.16835	3.11232	1509.2	FALSE	22
2022-09-14	10:48:02	0.696247	3.09705	3.11232	1495.12	FALSE	22
2022-09-14	10:48:02	0.692888	3.0821	3.11232	1512.29	FALSE	22
2022-09-14	10:48:02	0.697315	3.1018	3.11232	1498.22	FALSE	22
2022-09-14	10:48:03	0.684288	3.04385	2.8155	1515.33	FALSE	22
2022-09-14	10:48:03	0.63299	2.81567	2.8155	1501.04	FALSE	22
2022-09-14	10:48:03	0.599046	2.66468	2.8155	1517.99	FALSE	22
2022-09-14	10:48:03	0.615484	2.7378	2.8155	1503.77	FALSE	22
2022-09-14	10:48:04	0.5993	2.66581	2.51782	1520.66	FALSE	22
2022-09-14	10:48:04	0.57014	2.5361	2.51782	1506.31	FALSE	22
2022-09-14	10:48:04	0.562455	2.50191	2.51782	1523.16	FALSE	22
2022-09-14	10:48:04	0.532226	2.36745	2.51782	1508.68	FALSE	22
2022-09-14	10:48:05	0.556603	2.47588	2.68663	1525.64	FALSE	22
2022-09-14	10:48:05	0.610852	2.71719	2.68663	1511.39	FALSE	22
2022-09-14	10:48:05	0.644491	2.86682	2.68663	1528.5	FALSE	22
2022-09-14	10:48:06	0.615789	2.73915	2.61318	1514.13	FALSE	22
2022-09-14	10:48:06	0.637825	2.83717	2.61318	1531.34	FALSE	22
2022-09-14	10:48:06	0.586069	2.60695	2.61318	1516.74	FALSE	22
2022-09-14	10:48:06	0.510191	2.26943	2.61318	1533.61	FALSE	22
2022-09-14	10:48:07	0.519504	2.31086	2.47967	1519.05	FALSE	22
2022-09-14	10:48:07	0.535687	2.38284	2.47967	1535.99	FALSE	22
2022-09-14	10:48:07	0.565509	2.5155	2.47967	1521.57	FALSE	22
2022-09-14	10:48:07	0.609122	2.7095	2.47967	1538.7	FALSE	22
2022-09-14	10:48:08	0.609122	2.7095	2.47226	1524.28	FALSE	22
2022-09-14	10:48:08	0.604949	2.69093	2.47226	1541.39	FALSE	22
2022-09-14	10:48:08	0.532023	2.36654	2.47226	1526.64	FALSE	22
2022-09-14	10:48:08	0.477061	2.12206	2.47226	1543.52	FALSE	22
2022-09-14	10:48:09	0.76327	3.39518	4.64045	1530.04	FALSE	22
2022-09-14	10:48:09	0.771768	3.43298	4.64045	1546.95	FALSE	22
2022-09-14	10:48:09	1.59462	7.09319	4.64045	1537.13	FALSE	22
2022-09-14	10:48:10	2.96281	13.1792	13.2672	1560.13	FALSE	22
2022-09-14	10:48:10	3.21742	14.3117	13.2672	1551.44	1	23
2022-09-14	10:48:10	2.83121	12.5938	13.2672	1572.72	FALSE	23
2022-09-14	10:48:10	2.91894	12.984	13.2672	1564.43	FALSE	23
2022-09-14	10:48:11	1.46408	6.51252	2.26292	1579.23	FALSE	23
2022-09-14	10:48:11	0.734008	3.26501	2.26292	1567.69	FALSE	23
2022-09-14	10:48:11	0.702048	3.12285	2.26292	1582.36	FALSE	23
2022-09-14	10:48:11	-0.865228	-3.84871	2.26292	1567.69	FALSE	23
2022-09-14	10:48:12	2.33645	10.393	9.93965	1592.75	FALSE	23
2022-09-14	10:48:12	3.44709	15.3333	9.93965	1583.03	1	24
2022-09-14	10:48:12	1.41844	6.3095	9.93965	1599.06	FALSE	24
2022-09-14	10:48:12	1.73615	7.72274	9.93965	1590.75	FALSE	24
2022-09-14	10:48:13	0.584695	2.60084	2.67026	1601.66	FALSE	24
2022-09-14	10:48:13	0.553652	2.46275	2.67026	1593.21	FALSE	24
2022-09-14	10:48:13	0.662557	2.94719	2.67026	1604.61	FALSE	24
2022-09-14	10:48:14	1.6935	7.53303	13.3615	1600.74	FALSE	24
2022-09-14	10:48:14	2.66551	11.8567	13.3615	1616.46	FALSE	24
2022-09-14	10:48:14	4.16368	18.5209	13.3615	1619.26	1	25
2022-09-14	10:48:14	3.49248	15.5352	13.3615	1632	1	26
2022-09-14	10:48:15	3.51334	15.628	18.074	1634.89	1	27
2022-09-14	10:48:15	4.3424	19.3159	18.074	1651.32	1	28
2022-09-14	10:48:15	4.34734	19.3378	18.074	1654.23	1	29
2022-09-14	10:48:15	4.04983	18.0145	18.074	1669.33	1	30
2022-09-14	10:48:16	2.46749	10.9759	7.42493	1665.21	FALSE	30
2022-09-14	10:48:16	0.920267	4.09353	7.42493	1673.42	FALSE	30
2022-09-14	10:48:16	1.01223	4.5026	7.42493	1669.71	FALSE	30
2022-09-14	10:48:16	2.27681	10.1277	7.42493	1683.55	FALSE	30
2022-09-14	10:48:17	1.64653	7.32409	5.9971	1677.03	FALSE	30
2022-09-14	10:48:17	1.56989	6.98318	5.9971	1690.53	FALSE	30
2022-09-14	10:48:17	0.828206	3.68403	5.9971	1680.72	FALSE	30
2022-09-14	10:48:18	0.634567	2.82268	2.90848	1693.36	FALSE	30
2022-09-14	10:48:18	1.17309	5.21814	2.90848	1685.94	FALSE	30
2022-09-14	10:48:18	0.561183	2.49625	2.90848	1695.85	FALSE	30
2022-09-14	10:48:18	0.246578	1.09683	2.90848	1687.03	FALSE	30
2022-09-14	10:48:19	-0.705534	-3.13836	-0.169155	1695.85	FALSE	30
2022-09-14	10:48:19	0.218995	0.974134	-0.169155	1688.01	FALSE	30
2022-09-14	10:48:19	0.153143	0.681211	-0.169155	1696.54	FALSE	30
2022-09-14	10:48:19	0.181285	0.806392	-0.169155	1688.81	FALSE	30
2022-09-14	10:48:20	0.653448	2.90667	1.49751	1699.44	FALSE	30
2022-09-14	10:48:20	0.305611	1.35942	1.49751	1690.17	FALSE	30
2022-09-14	10:48:20	0.283728	1.26208	1.49751	1700.7	FALSE	30
2022-09-14	10:48:20	0.10383	0.461857	1.49751	1690.63	FALSE	30
2022-09-14	10:48:21	0.0143132	0.063668	-3.05037	1700.77	FALSE	30
2022-09-14	10:48:21	-0.848282	-3.77333	-3.05037	1690.63	FALSE	30
2022-09-14	10:48:21	-1.22329	-5.44144	-3.05037	1700.77	FALSE	30
2022-09-14	10:48:22	-0.0429387	-0.191	-3.32358	1690.63	FALSE	30
2022-09-14	10:48:22	-1.1209	-4.98599	-3.32358	1700.77	FALSE	30
2022-09-14	10:48:22	-0.874694	-3.89081	-3.32358	1690.63	FALSE	30
2022-09-14	10:48:22	-0.950165	-4.22652	-3.32358	1700.77	FALSE	30
2022-09-14	10:48:23	-1.01342	-4.50789	-4.3478	1690.63	FALSE	30
2022-09-14	10:48:23	-1.03322	-4.59597	-4.3478	1700.77	FALSE	30
2022-09-14	10:48:23	-1.05123	-4.67608	-4.3478	1690.63	FALSE	30
2022-09-14	10:48:23	-0.811844	-3.61124	-4.3478	1700.77	FALSE	30
2022-09-14	10:48:24	0.651768	2.89919	-0.432029	1693.53	FALSE	30
2022-09-14	10:48:24	-0.107417	-0.477812	-0.432029	1700.77	FALSE	30
2022-09-14	10:48:24	-0.406704	-1.8091	-0.432029	1693.53	FALSE	30
2022-09-14	10:48:24	-0.526145	-2.3404	-0.432029	1700.77	FALSE	30
2022-09-14	10:48:25	-0.596628	-2.65392	-2.74145	1693.53	FALSE	30
2022-09-14	10:48:25	-0.628994	-2.79789	-2.74145	1700.77	FALSE	30
2022-09-14	10:48:25	-0.623294	-2.77254	-2.74145	1693.53	FALSE	30
2022-09-14	10:48:26	-0.631284	-2.80808	-2.99585	1700.77	FALSE	30
2022-09-14	10:48:26	-0.714694	-3.1791	-2.99585	1693.53	FALSE	30
2022-09-14	10:48:26	-0.734694	-3.26807	-2.99585	1700.77	FALSE	30
2022-09-14	10:48:26	-0.61332	-2.72817	-2.99585	1693.53	FALSE	30
2022-09-14	10:48:27	-0.687518	-3.05822	-2.86524	1700.77	FALSE	30
2022-09-14	10:48:27	-0.551793	-2.45449	-2.86524	1693.53	FALSE	30
2022-09-14	10:48:27	-0.652048	-2.90044	-2.86524	1700.77	FALSE	30
2022-09-14	10:48:27	-0.685177	-3.0478	-2.86524	1693.53	FALSE	30
2022-09-14	10:48:28	-0.719427	-3.20016	-3.07073	1700.77	FALSE	30
2022-09-14	10:48:28	-0.67617	-3.00774	-3.07073	1693.53	FALSE	30
2022-09-14	10:48:28	-0.679376	-3.022	-3.07073	1700.77	FALSE	30
2022-09-14	10:48:28	-0.686348	-3.05301	-3.07073	1693.53	FALSE	30
2022-09-14	10:48:29	-0.754083	-3.35431	-3.37474	1700.77	FALSE	30
2022-09-14	10:48:29	-0.765534	-3.40525	-3.37474	1693.53	FALSE	30
2022-09-14	10:48:29	-0.754694	-3.35703	-3.37474	1700.77	FALSE	30
2022-09-14	10:48:29	-0.760394	-3.38238	-3.37474	1693.53	FALSE	30
2022-09-14	10:48:30	-0.747162	-3.32353	-3.42283	1700.77	FALSE	30
2022-09-14	10:48:30	-0.756068	-3.36314	-3.42283	1693.53	FALSE	30
2022-09-14	10:48:30	-0.805228	-3.58182	-3.42283	1700.77	FALSE	30
2022-09-14	10:48:31	-0.806246	-3.58634	-4.16959	1693.53	FALSE	30
2022-09-14	10:48:31	-0.905534	-4.028	-4.16959	1700.77	FALSE	30
2022-09-14	10:48:31	-0.956373	-4.25414	-4.16959	1693.53	FALSE	30
2022-09-14	10:48:31	-1.08131	-4.80988	-4.16959	1700.77	FALSE	30
2022-09-14	10:48:32	-1.10818	-4.92941	-5.24965	1693.53	FALSE	30
2022-09-14	10:48:32	-1.09932	-4.89	-5.24965	1700.77	FALSE	30
2022-09-14	10:48:32	-1.19398	-5.31106	-5.24965	1693.53	FALSE	30
2022-09-14	10:48:32	-1.31922	-5.86815	-5.24965	1700.77	FALSE	30
2022-09-14	10:48:33	-1.29281	-5.75068	-5.26874	1693.53	FALSE	30
2022-09-14	10:48:33	-1.21067	-5.3853	-5.26874	1700.77	FALSE	30
2022-09-14	10:48:33	-1.14233	-5.08131	-5.26874	1693.53	FALSE	30
2022-09-14	10:48:33	-1.09205	-4.85766	-5.26874	1700.77	FALSE	30
2022-09-14	10:48:34	-0.979987	-4.35918	-4.11711	1693.53	FALSE	30
2022-09-14	10:48:34	-0.951539	-4.23264	-4.11711	1700.77	FALSE	30
2022-09-14	10:48:34	-0.845177	-3.75952	-4.11711	1693.53	FALSE	30
2022-09-14	10:48:35	-0.852302	-3.79121	-4.27706	1700.77	FALSE	30
2022-09-14	10:48:35	-0.809961	-3.60287	-4.27706	1693.53	FALSE	30
2022-09-14	10:48:35	-1.11179	-4.94546	-4.27706	1700.77	FALSE	30
2022-09-14	10:48:35	-1.07205	-4.76869	-4.27706	1693.53	FALSE	30
2022-09-14	10:48:36	-0.60131	-2.67475	-1.15036	1700.77	FALSE	30
2022-09-14	10:48:36	-0.215509	-0.958627	-1.15036	1693.53	FALSE	30
2022-09-14	10:48:36	-0.108587	-0.483017	-1.15036	1700.77	FALSE	30
2022-09-14	10:48:36	-0.109046	-0.485058	-1.15036	1693.53	FALSE	30
2022-09-14	10:48:37	-0.0969335	-0.43118	-2.91227	1700.77	FALSE	30
2022-09-14	10:48:37	-0.435763	-1.93836	-2.91227	1693.53	FALSE	30
2022-09-14	10:48:37	-1.00681	-4.47849	-2.91227	1700.77	FALSE	30
2022-09-14	10:48:37	-1.07932	-4.80103	-2.91227	1693.53	FALSE	30
2022-09-14	10:48:38	-1.01424	-4.51154	-4.46535	1700.77	FALSE	30
2022-09-14	10:48:38	-0.994949	-4.42573	-4.46535	1693.53	FALSE	30
2022-09-14	10:48:38	-1.00238	-4.45879	-4.46535	1700.77	FALSE	30
2022-09-14	10:48:39	-1.02304	-4.55069	-3.39551	1693.53	FALSE	30
2022-09-14	10:48:39	-0.988333	-4.3963	-3.39551	1700.77	FALSE	30
2022-09-14	10:48:39	-0.995966	-4.43026	-3.39551	1693.53	FALSE	30
2022-09-14	10:48:39	-0.046043	-0.204808	-3.39551	1700.77	FALSE	30
2022-09-14	10:48:40	-0.786195	-3.49715	3.5667	1693.53	FALSE	30
2022-09-14	10:48:40	0.301285	1.34018	3.5667	1702.11	FALSE	30
2022-09-14	10:48:40	1.06403	4.73302	3.5667	1698.27	FALSE	30
2022-09-14	10:48:40	2.6282	11.6908	3.5667	1713.8	FALSE	30
2022-09-14	10:48:41	1.31828	5.86397	2.18878	1704.13	FALSE	30
2022-09-14	10:48:41	0.581641	2.58726	2.18878	1716.39	FALSE	30
2022-09-14	10:48:41	0.710089	3.15862	2.18878	1707.29	FALSE	30
2022-09-14	10:48:41	-0.641768	-2.85471	2.18878	1716.39	FALSE	30
2022-09-14	10:48:42	-1.18299	-5.26218	-5.35175	1707.29	FALSE	30
2022-09-14	10:48:42	-1.1634	-5.17504	-5.35175	1716.39	FALSE	30
2022-09-14	10:48:42	-1.26299	-5.61803	-5.35175	1707.29	FALSE	30
2022-09-14	10:48:43	-1.16543	-5.18407	-5.3808	1716.39	FALSE	30
2022-09-14	10:48:43	-1.27383	-5.66625	-5.3808	1707.29	FALSE	30
2022-09-14	10:48:43	-1.14513	-5.09377	-5.3808	1716.39	FALSE	30
2022-09-14	10:48:43	-1.25424	-5.57911	-5.3808	1707.29	FALSE	30
2022-09-14	10:48:44	-1.16569	-5.18522	-5.29607	1716.39	FALSE	30
2022-09-14	10:48:44	-1.2324	-5.48196	-5.29607	1707.29	FALSE	30
2022-09-14	10:48:44	-1.18482	-5.27032	-5.29607	1716.39	FALSE	30
2022-09-14	10:48:44	-1.17953	-5.24679	-5.29607	1707.29	FALSE	30
2022-09-14	10:48:45	0.466781	2.07634	4.79443	1718.46	FALSE	30
2022-09-14	10:48:45	0.771005	3.42958	4.79443	1710.72	FALSE	30
2022-09-14	10:48:45	1.25752	5.5937	4.79443	1724.06	FALSE	30
2022-09-14	10:48:45	1.81604	8.07811	4.79443	1718.8	FALSE	30
2022-09-14	10:48:46	0.945814	4.20717	12.4994	1728.26	FALSE	30
2022-09-14	10:48:46	3.19731	14.2223	12.4994	1733.02	1	31
2022-09-14	10:48:46	4.28683	19.0687	12.4994	1747.33	1	32
2022-09-14	10:48:47	3.08739	13.7333	16.1967	1746.75	1	33
2022-09-14	10:48:47	6.34876	28.2406	16.1967	1775.57	1	34
2022-09-14	10:48:47	3.98749	17.7372	16.1967	1764.49	1	35
2022-09-14	10:48:47	1.14108	5.07575	16.1967	1780.65	FALSE	35
2022-09-14	10:48:48	0.458588	2.03989	2.49348	1766.53	FALSE	35
2022-09-14	10:48:48	0.316552	1.40809	2.49348	1782.06	FALSE	35
2022-09-14	10:48:48	0.730903	3.2512	2.49348	1769.78	FALSE	35
2022-09-14	10:48:48	0.736196	3.27475	2.49348	1785.33	FALSE	35
2022-09-14	10:48:49	0.551056	2.45121	3.08001	1772.23	FALSE	35
2022-09-14	10:48:49	0.732226	3.25709	3.08001	1788.59	FALSE	35
2022-09-14	10:48:49	0.741234	3.29716	3.08001	1775.53	FALSE	35
2022-09-14	10:48:49	0.745153	3.31459	3.08001	1791.9	FALSE	35
2022-09-14	10:48:50	0.735433	3.27135	2.08749	1778.8	FALSE	35
2022-09-14	10:48:50	0.431107	1.91765	2.08749	1793.82	FALSE	35
2022-09-14	10:48:50	0.448257	1.99394	2.08749	1780.79	FALSE	35
2022-09-14	10:48:50	0.262354	1.167	2.08749	1794.99	FALSE	35
2022-09-14	10:48:51	0.414924	1.84566	1.37745	1782.64	FALSE	35
2022-09-14	10:48:51	0.167239	0.743913	1.37745	1795.73	FALSE	35
2022-09-14	10:48:51	0.346832	1.54278	1.37745	1784.18	FALSE	35
2022-09-14	10:48:52	0.0627101	0.278947	0.55031	1796.01	FALSE	35
2022-09-14	10:48:52	0.170496	0.7584	0.55031	1784.94	FALSE	35
2022-09-14	10:48:52	0.0588934	0.26197	0.55031	1796.27	FALSE	35
2022-09-14	10:48:52	0.202761	0.901921	0.55031	1785.84	FALSE	35
2022-09-14	10:48:53	0.124593	0.554215	1.57458	1796.83	FALSE	35
2022-09-14	10:48:53	0.406985	1.81035	1.57458	1787.65	FALSE	35
2022-09-14	10:48:53	0.370242	1.64691	1.57458	1798.47	FALSE	35
2022-09-14	10:48:53	0.51411	2.28686	1.57458	1789.94	FALSE	35
2022-09-14	10:48:54	0.415585	1.84861	1.51759	1800.32	FALSE	35
2022-09-14	10:48:54	0.329886	1.4674	1.51759	1791.41	FALSE	35
2022-09-14	10:48:54	0.375229	1.66909	1.51759	1801.99	FALSE	35
2022-09-14	10:48:54	0.243982	1.08528	1.51759	1792.49	FALSE	35
2022-09-14	10:48:55	0.37355	1.66163	3.01435	1803.65	FALSE	35
2022-09-14	10:48:55	0.464797	2.06751	3.01435	1794.56	FALSE	35
2022-09-14	10:48:55	1.19462	5.31391	3.01435	1808.97	FALSE	35
2022-09-14	10:48:56	1.29599	5.76482	5.50438	1800.32	FALSE	35
2022-09-14	10:48:56	1.47772	6.57319	5.50438	1815.54	FALSE	35
2022-09-14	10:48:56	1.13156	5.03341	5.50438	1805.36	FALSE	35
2022-09-14	10:48:56	1.04449	4.6461	5.50438	1820.19	FALSE	35
2022-09-14	10:48:57	0.517214	2.30067	2.91929	1807.66	FALSE	35
2022-09-14	10:48:57	0.803168	3.57265	2.91929	1823.76	FALSE	35
2022-09-14	10:48:57	0.404644	1.79994	2.91929	1809.46	FALSE	35
2022-09-14	10:48:57	0.900114	4.00389	2.91929	1827.76	FALSE	35
2022-09-14	10:48:58	0.861183	3.83071	5.98113	1813.29	FALSE	35
2022-09-14	10:48:58	0.670191	2.98114	5.98113	1830.74	FALSE	35
2022-09-14	10:48:58	0.641132	2.85188	5.98113	1816.14	FALSE	35
2022-09-14	10:48:58	3.20597	14.2608	5.98113	1845	1	36
2022-09-14	10:48:59	0.706629	3.14323	2.36798	1819.28	FALSE	36
2022-09-14	10:48:59	0.458995	2.0417	2.36798	1847.05	FALSE	36
2022-09-14	10:48:59	0.431412	1.91901	2.36798	1821.2	FALSE	36
2022-09-14	10:49:00	0.384389	1.70984	1.57085	1848.76	FALSE	36
2022-09-14	10:49:00	0.462303	2.05642	1.57085	1823.26	FALSE	36
2022-09-14	10:49:00	0.230446	1.02507	1.57085	1849.78	FALSE	36
2022-09-14	10:49:00	0.335433	1.49207	1.57085	1824.75	FALSE	36
2022-09-14	10:49:01	0.257214	1.14414	1.42761	1850.92	FALSE	36
2022-09-14	10:49:01	0.367494	1.63469	1.42761	1826.39	FALSE	36
2022-09-14	10:49:01	0.286069	1.27249	1.42761	1852.2	FALSE	36
2022-09-14	10:49:01	0.37299	1.65913	1.42761	1828.05	FALSE	36
2022-09-14	10:49:02	0.483168	2.14923	1.70226	1854.35	FALSE	36
2022-09-14	10:49:02	0.341794	1.52037	1.70226	1829.57	FALSE	36
2022-09-14	10:49:02	0.411718	1.8314	1.70226	1856.18	FALSE	36
2022-09-14	10:49:02	0.294059	1.30803	1.70226	1830.87	FALSE	36
2022-09-14	10:49:03	0.496145	2.20695	1.8311	1858.38	FALSE	36
2022-09-14	10:49:03	0.221539	0.98545	1.8311	1831.86	FALSE	36
2022-09-14	10:49:03	0.517264	2.30089	1.8311	1860.69	FALSE	36
2022-09-14	10:49:04	0.285458	1.26977	1.67639	1833.13	FALSE	36
2022-09-14	10:49:04	0.517315	2.30112	1.67639	1862.99	FALSE	36
2022-09-14	10:49:04	0.236298	1.0511	1.67639	1834.18	FALSE	36
2022-09-14	10:49:04	0.46841	2.08358	1.67639	1865.07	FALSE	36
2022-09-14	10:49:05	0.285051	1.26796	1.75211	1835.45	FALSE	36
2022-09-14	10:49:05	0.478842	2.12998	1.75211	1867.2	FALSE	36
2022-09-14	10:49:05	0.362913	1.61431	1.75211	1837.06	FALSE	36
2022-09-14	10:49:05	0.448766	1.9962	1.75211	1869.2	FALSE	36
2022-09-14	10:49:06	0.448155	1.99348	2.01929	1839.06	FALSE	36
2022-09-14	10:49:06	0.398588	1.773	2.01929	1870.97	FALSE	36
2022-09-14	10:49:06	0.516501	2.2975	2.01929	1841.35	FALSE	36
2022-09-14	10:49:06	0.452583	2.01318	2.01929	1872.98	FALSE	36
2022-09-14	10:49:07	0.464644	2.06683	2.09407	1843.42	FALSE	36
2022-09-14	10:49:07	0.470395	2.09241	2.09407	1875.08	FALSE	36
2022-09-14	10:49:07	0.477265	2.12297	2.09407	1845.54	FALSE	36

## Sheet: Ursula_martin_2022914104350 (3)
Date	Time	Lbs	Newtons	Total force x time		total steps > 13.345	**GoPro Fitting: 1032
2022-09-14	10:44:07	1.30709	5.8142	5.8142	FALSE	0
2022-09-14	10:44:07	1.43528	6.38441	6.38441	FALSE	0
2022-09-14	10:44:07	3.94719	17.5579	23.3721	1	1
2022-09-14	10:44:07	4.74372	21.101	27.4854	1	2
2022-09-14	10:44:08	1.86866	8.31217	31.6843	FALSE	2
2022-09-14	10:44:08	2.14052	9.52146	37.0069	FALSE	2
2022-09-14	10:44:08	1.47401	6.55669	38.241	FALSE	2
2022-09-14	10:44:08	1.10653	4.92207	41.929	FALSE	2
2022-09-14	10:44:09	0.470344	2.09218	40.3331	FALSE	2
2022-09-14	10:44:09	0.236501	1.052	42.981	FALSE	2
2022-09-14	10:44:09	0.121387	0.539954	40.8731	FALSE	2
2022-09-14	10:44:09	0.195026	0.867515	43.8485	FALSE	2
2022-09-14	10:44:10	0.109071	0.48517	41.3583	FALSE	2
2022-09-14	10:44:10	0.0843895	0.375381	44.2239	FALSE	2
2022-09-14	10:44:10	0.512939	2.28166	43.6399	FALSE	2
2022-09-14	10:44:11	0.620573	2.76043	46.9843	FALSE	2
2022-09-14	10:44:11	0.554364	2.46592	46.1058	FALSE	2
2022-09-14	10:44:11	0.663371	2.95081	49.9351	FALSE	2
2022-09-14	10:44:11	0.5364	2.38601	48.4919	FALSE	2
2022-09-14	10:44:12	0.623982	2.7756	52.7107	FALSE	2
2022-09-14	10:44:12	0.315992	1.4056	49.8974	FALSE	2
2022-09-14	10:44:12	0.247239	1.09977	53.8105	FALSE	2
2022-09-14	10:44:12	0.293244	1.30441	51.2019	FALSE	2
2022-09-14	10:44:13	0.100064	0.445105	54.2556	FALSE	2
2022-09-14	10:44:13	0.336654	1.4975	52.6994	FALSE	2
2022-09-14	10:44:13	0.175585	0.781037	55.0366	FALSE	2
2022-09-14	10:44:14	0.346018	1.53916	54.2385	FALSE	2
2022-09-14	10:44:14	0.178893	0.795752	55.8324	FALSE	2
2022-09-14	10:44:14	0.375433	1.67	55.9085	FALSE	2
2022-09-14	10:44:14	1.00016	4.44891	60.2813	FALSE	2
2022-09-14	10:44:15	0.556959	2.47747	58.386	FALSE	2
2022-09-14	10:44:15	0.747443	3.32478	63.606	FALSE	2
2022-09-14	10:44:15	0.649631	2.88969	61.2757	FALSE	2
2022-09-14	10:44:15	-0.647518	-2.88029	63.606	FALSE	2
2022-09-14	10:44:16	-0.452913	-2.01465	61.2757	FALSE	2
2022-09-14	10:44:16	0.263575	1.17243	64.7785	FALSE	2
2022-09-14	10:44:16	0.926527	4.12138	65.397	FALSE	2
2022-09-14	10:44:16	0.57243	2.54628	67.3248	FALSE	2
2022-09-14	10:44:17	0.461183	2.05143	67.4485	FALSE	2
2022-09-14	10:44:17	0.249835	1.11132	68.4361	FALSE	2
2022-09-14	10:44:17	0.561285	2.49671	69.9452	FALSE	2
2022-09-14	10:44:17	0.366374	1.6297	70.0658	FALSE	2
2022-09-14	10:44:18	0.457774	2.03627	71.9815	FALSE	2
2022-09-14	10:44:18	0.423168	1.88234	71.9481	FALSE	2
2022-09-14	10:44:18	0.462863	2.05891	74.0404	FALSE	2
2022-09-14	10:44:19	0.353804	1.57379	73.5219	FALSE	2
2022-09-14	10:44:19	0.340573	1.51494	75.5553	FALSE	2
2022-09-14	10:44:19	0.453092	2.01544	75.5374	FALSE	2
2022-09-14	10:44:19	0.440369	1.95885	77.5142	FALSE	2
2022-09-14	10:44:20	0.467647	2.08019	77.6175	FALSE	2
2022-09-14	10:44:20	0.493193	2.19382	79.708	FALSE	2
2022-09-14	10:44:20	0.459809	2.04532	79.6629	FALSE	2
2022-09-14	10:44:20	0.650954	2.89557	82.6035	FALSE	2
2022-09-14	10:44:21	3.49136	15.5303	95.1931	1	3
2022-09-14	10:44:21	0.335178	1.49094	84.0945	FALSE	3
2022-09-14	10:44:21	0.19472	0.866154	96.0593	FALSE	3
2022-09-14	10:44:21	0.218995	0.974134	85.0686	FALSE	3
2022-09-14	10:44:22	0.31584	1.40492	97.4642	FALSE	3
2022-09-14	10:44:22	0.358639	1.5953	86.6639	FALSE	3
2022-09-14	10:44:22	0.383982	1.70803	99.1722	FALSE	3
2022-09-14	10:44:23	0.347596	1.54618	88.2101	FALSE	3
2022-09-14	10:44:23	0.523575	2.32897	101.501	FALSE	3
2022-09-14	10:44:23	1.14246	5.08189	93.292	FALSE	3
2022-09-14	10:44:23	1.76836	7.86602	109.367	FALSE	3
2022-09-14	10:44:24	1.30831	5.81962	99.1116	FALSE	3
2022-09-14	10:44:24	0.614262	2.73236	112.1	FALSE	3
2022-09-14	10:44:24	0.611768	2.72127	101.833	FALSE	3
2022-09-14	10:44:24	0.735433	3.27135	115.371	FALSE	3
2022-09-14	10:44:25	0.376094	1.67294	103.506	FALSE	3
2022-09-14	10:44:25	0.374771	1.66706	117.038	FALSE	3
2022-09-14	10:44:25	0.439708	1.95591	105.462	FALSE	3
2022-09-14	10:44:25	0.185356	0.824501	117.862	FALSE	3
2022-09-14	10:44:26	0.205153	0.912562	106.374	FALSE	3
2022-09-14	10:44:26	0.23411	1.04137	118.904	FALSE	3
2022-09-14	10:44:26	0.149937	0.66695	107.041	FALSE	3
2022-09-14	10:44:27	0.292481	1.30101	120.205	FALSE	3
2022-09-14	10:44:27	0.190089	0.845554	107.887	FALSE	3
2022-09-14	10:44:27	0.174059	0.774249	120.979	FALSE	3
2022-09-14	10:44:27	0.185611	0.825635	108.712	FALSE	3
2022-09-14	10:44:28	0.170293	0.757497	121.737	FALSE	3
2022-09-14	10:44:28	0.300624	1.33724	110.05	FALSE	3
2022-09-14	10:44:28	0.111362	0.49536	122.232	FALSE	3
2022-09-14	10:44:28	0.253855	1.1292	111.179	FALSE	3
2022-09-14	10:44:29	0.0944149	0.419976	122.652	FALSE	3
2022-09-14	10:44:29	0.294262	1.30894	112.488	FALSE	3
2022-09-14	10:44:29	0.0455091	0.202434	122.854	FALSE	3
2022-09-14	10:44:29	0.257774	1.14663	113.634	FALSE	3
2022-09-14	10:44:30	0.148359	0.659931	123.514	FALSE	3
2022-09-14	10:44:30	0.260115	1.15704	114.791	FALSE	3
2022-09-14	10:44:30	0.175992	0.782848	124.297	FALSE	3
2022-09-14	10:44:30	0.29757	1.32365	116.115	FALSE	3
2022-09-14	10:44:31	0.159097	0.707695	125.005	FALSE	3
2022-09-14	10:44:31	0.099962	0.444651	116.56	FALSE	3
2022-09-14	10:44:31	0.13757	0.611939	125.617	FALSE	3
2022-09-14	10:44:32	0.213448	0.949459	117.509	FALSE	3
2022-09-14	10:44:32	0.406832	1.80967	127.426	FALSE	3
2022-09-14	10:44:32	0.18383	0.817713	118.327	FALSE	3
2022-09-14	10:44:32	0.353448	1.57221	128.999	FALSE	3
2022-09-14	10:44:33	0.14673	0.652684	118.98	FALSE	3
2022-09-14	10:44:33	0.35645	1.58556	130.584	FALSE	3
2022-09-14	10:44:33	0.0461707	0.205377	119.185	FALSE	3
2022-09-14	10:44:33	0.225306	1.00221	131.586	FALSE	3
2022-09-14	10:44:34	0.181336	0.806619	119.992	FALSE	3
2022-09-14	10:44:34	0.191463	0.851666	132.438	FALSE	3
2022-09-14	10:44:34	0.0154837	0.0688746	120.061	FALSE	3
2022-09-14	10:44:34	0.109428	0.486758	132.925	FALSE	3
2022-09-14	10:44:35	0.0619468	0.275552	120.336	FALSE	3
2022-09-14	10:44:35	-0.0534221	-0.237632	132.925	FALSE	3
2022-09-14	10:44:35	-0.135152	-0.601183	120.336	FALSE	3
2022-09-14	10:44:36	-0.0356104	-0.158402	132.925	FALSE	3
2022-09-14	10:44:36	-0.211895	-0.942551	120.336	FALSE	3
2022-09-14	10:44:36	-0.314745	-1.40005	132.925	FALSE	3
2022-09-14	10:44:36	-0.479936	-2.13485	120.336	FALSE	3
2022-09-14	10:44:37	-0.264058	-1.17458	132.925	FALSE	3
2022-09-14	10:44:37	-0.212048	-0.943232	120.336	FALSE	3
2022-09-14	10:44:37	0.011616	0.0516703	132.977	FALSE	3
2022-09-14	10:44:37	-0.0182567	-0.0812095	120.336	FALSE	3
2022-09-14	10:44:38	0.340115	1.5129	134.489	FALSE	3
2022-09-14	10:44:38	1.06999	4.75953	125.096	FALSE	3
2022-09-14	10:44:38	2.25284	10.0211	144.511	FALSE	3
2022-09-14	10:44:38	3.85518	17.1486	142.244	1	4
2022-09-14	10:44:39	3.96393	17.6324	162.143	1	5
2022-09-14	10:44:39	3.41548	15.1927	157.437	1	6
2022-09-14	10:44:39	3.85406	17.1436	179.287	1	7
2022-09-14	10:44:40	2.268	10.0885	167.525	FALSE	7
2022-09-14	10:44:40	1.89365	8.42333	187.71	FALSE	7
2022-09-14	10:44:40	1.51238	6.72737	174.253	FALSE	7
2022-09-14	10:44:40	1.20663	5.36733	193.077	FALSE	7
2022-09-14	10:44:41	1.33716	5.94796	180.201	FALSE	7
2022-09-14	10:44:41	1.25843	5.59775	198.675	FALSE	7
2022-09-14	10:44:41	1.43996	6.40523	186.606	FALSE	7
2022-09-14	10:44:41	1.21502	5.40465	204.08	FALSE	7
2022-09-14	10:44:42	1.21655	5.41146	192.017	FALSE	7
2022-09-14	10:44:42	1.29177	5.74605	209.826	FALSE	7
2022-09-14	10:44:42	1.26042	5.6066	197.624	FALSE	7
2022-09-14	10:44:42	1.29691	5.76892	215.595	FALSE	7
2022-09-14	10:44:43	1.34719	5.99257	203.617	FALSE	7
2022-09-14	10:44:43	1.31467	5.84792	221.442	FALSE	7
2022-09-14	10:44:43	2.02989	9.02936	212.646	FALSE	7
2022-09-14	10:44:44	1.60637	7.14546	228.588	FALSE	7
2022-09-14	10:44:44	1.7105	7.60865	220.255	FALSE	7
2022-09-14	10:44:44	0.804593	3.57899	232.167	FALSE	7
2022-09-14	10:44:44	0.421896	1.87668	222.131	FALSE	7
2022-09-14	10:44:45	0.291361	1.29603	233.463	FALSE	7
2022-09-14	10:44:45	0.370089	1.64623	223.778	FALSE	7
2022-09-14	10:44:45	0.386272	1.71822	235.181	FALSE	7
2022-09-14	10:44:45	0.150293	0.668533	224.446	FALSE	7
2022-09-14	10:44:46	-0.116068	-0.516294	235.181	FALSE	7
2022-09-14	10:44:46	-0.175458	-0.780472	224.446	FALSE	7
2022-09-14	10:44:46	-0.202379	-0.900222	235.181	FALSE	7
2022-09-14	10:44:46	0.515687	2.29388	226.74	FALSE	7
2022-09-14	10:44:47	0.29243	1.30079	236.482	FALSE	7
2022-09-14	10:44:47	-0.131692	-0.585792	226.74	FALSE	7
2022-09-14	10:44:47	-0.062328	-0.277247	236.482	FALSE	7
2022-09-14	10:44:48	-0.231336	-1.02903	226.74	FALSE	7
2022-09-14	10:44:48	-0.033015	-0.146857	236.482	FALSE	7
2022-09-14	10:44:48	-0.150216	-0.668191	226.74	FALSE	7
2022-09-14	10:44:48	0.0322267	0.143351	236.625	FALSE	7
2022-09-14	10:44:49	-0.15047	-0.669321	226.74	FALSE	7
2022-09-14	10:44:49	0.064186	0.285512	236.911	FALSE	7
2022-09-14	10:44:49	-0.0238038	-0.105884	226.74	FALSE	7
2022-09-14	10:44:49	0.099962	0.444651	237.355	FALSE	7
2022-09-14	10:44:50	-0.134389	-0.597789	226.74	FALSE	7
2022-09-14	10:44:50	0.00215038	0.00956532	237.365	FALSE	7
2022-09-14	10:44:50	-0.0438547	-0.195074	226.74	FALSE	7
2022-09-14	10:44:50	0.0233717	0.103962	237.469	FALSE	7
2022-09-14	10:44:51	-0.153727	-0.683808	226.74	FALSE	7
2022-09-14	10:44:51	0.0118705	0.0528024	237.522	FALSE	7
2022-09-14	10:44:51	-0.124007	-0.551608	226.74	FALSE	7
2022-09-14	10:44:52	-0.00426182	-0.0189574	237.522	FALSE	7
2022-09-14	10:44:52	0.48444	2.15489	228.895	FALSE	7
2022-09-14	10:44:52	1.72006	7.65117	245.173	FALSE	7
2022-09-14	10:44:52	1.98531	8.83106	237.726	FALSE	7
2022-09-14	10:44:53	2.20785	9.82096	254.994	FALSE	7
2022-09-14	10:44:53	1.68266	7.48481	245.211	FALSE	7
2022-09-14	10:44:53	1.45472	6.47089	261.465	FALSE	7
2022-09-14	10:44:53	1.20342	5.35305	250.564	FALSE	7
2022-09-14	10:44:54	0.907494	4.03671	265.502	FALSE	7
2022-09-14	10:44:54	1.04357	4.64201	255.206	FALSE	7
2022-09-14	10:44:54	0.747646	3.32568	268.827	FALSE	7
2022-09-14	10:44:55	0.43126	1.91833	257.124	FALSE	7
2022-09-14	10:44:55	0.246934	1.09841	269.926	FALSE	7
2022-09-14	10:44:55	0.159097	0.707695	257.832	FALSE	7
2022-09-14	10:44:55	0.162659	0.72354	270.649	FALSE	7
2022-09-14	10:44:56	0.704593	3.13417	260.966	FALSE	7
2022-09-14	10:44:56	0.0468832	0.208546	270.858	FALSE	7
2022-09-14	10:44:56	-0.0163738	-0.0728339	260.966	FALSE	7
2022-09-14	10:44:56	-0.00899467	-0.0400101	270.858	FALSE	7
2022-09-14	10:44:57	-0.114389	-0.508825	260.966	FALSE	7
2022-09-14	10:44:57	-0.03673	-0.163382	270.858	FALSE	7
2022-09-14	10:44:57	-0.0973407	-0.432991	260.966	FALSE	7
2022-09-14	10:44:57	0.0711071	0.316299	271.174	FALSE	7
2022-09-14	10:44:58	-0.104923	-0.466718	260.966	FALSE	7
2022-09-14	10:44:58	0.0542623	0.24137	271.415	FALSE	7
2022-09-14	10:44:58	-0.104364	-0.464232	260.966	FALSE	7
2022-09-14	10:44:58	0.0482572	0.214658	271.63	FALSE	7
2022-09-14	10:44:59	0.086934	0.3867	261.353	FALSE	7
2022-09-14	10:44:59	0.292176	1.29966	272.93	FALSE	7
2022-09-14	10:44:59	0.289835	1.28924	262.642	FALSE	7
2022-09-14	10:45:00	0.350802	1.56044	274.49	FALSE	7
2022-09-14	10:45:00	0.716959	3.18918	265.831	FALSE	7
2022-09-14	10:45:00	0.610852	2.71719	277.207	FALSE	7
2022-09-14	10:45:00	0.705814	3.1396	268.971	FALSE	7
2022-09-14	10:45:01	0.895331	3.98261	281.19	FALSE	7
2022-09-14	10:45:01	0.708257	3.15047	272.121	FALSE	7
2022-09-14	10:45:01	0.646628	2.87633	284.066	FALSE	7
2022-09-14	10:45:01	0.912735	4.06003	276.181	FALSE	7
2022-09-14	10:45:02	0.931005	4.1413	288.208	FALSE	7
2022-09-14	10:45:02	1.12057	4.98452	281.166	FALSE	7
2022-09-14	10:45:02	0.817824	3.63784	291.845	FALSE	7
2022-09-14	10:45:02	0.36897	1.64125	282.807	FALSE	7
2022-09-14	10:45:03	0.0438297	0.194963	292.04	FALSE	7
2022-09-14	10:45:03	-0.170979	-0.760549	282.807	FALSE	7
2022-09-14	10:45:03	-0.279427	-1.24295	292.04	FALSE	7
2022-09-14	10:45:04	-0.40589	-1.80548	282.807	FALSE	7
2022-09-14	10:45:04	-0.499732	-2.22291	292.04	FALSE	7
2022-09-14	10:45:04	-0.551844	-2.45471	282.807	FALSE	7
2022-09-14	10:45:04	-0.565228	-2.51425	292.04	FALSE	7
2022-09-14	10:45:05	-0.592811	-2.63694	282.807	FALSE	7
2022-09-14	10:45:05	-0.692251	-3.07927	292.04	FALSE	7
2022-09-14	10:45:05	-0.642073	-2.85607	282.807	FALSE	7
2022-09-14	10:45:05	-0.737289	-3.27961	292.04	FALSE	7
2022-09-14	10:45:06	-0.647162	-2.87871	282.807	FALSE	7
2022-09-14	10:45:06	-0.849147	-3.77718	292.04	FALSE	7
2022-09-14	10:45:06	-0.657646	-2.92534	282.807	FALSE	7
2022-09-14	10:45:06	-0.7379	-3.28233	292.04	FALSE	7
2022-09-14	10:45:07	-0.606806	-2.69919	282.807	FALSE	7
2022-09-14	10:45:07	-0.621005	-2.76235	292.04	FALSE	7
2022-09-14	10:45:07	-0.321157	-1.42857	282.807	FALSE	7
2022-09-14	10:45:08	-0.179834	-0.799938	292.04	FALSE	7
2022-09-14	10:45:08	-0.208231	-0.926253	282.807	FALSE	7
2022-09-14	10:45:08	-0.0103687	-0.0461221	292.04	FALSE	7
2022-09-14	10:45:08	-0.0145417	-0.0646844	282.807	FALSE	7
2022-09-14	10:45:09	0.184542	0.82088	292.861	FALSE	7
2022-09-14	10:45:09	-0.181768	-0.80854	282.807	FALSE	7
2022-09-14	10:45:09	-0.00217532	-0.00967626	292.861	FALSE	7
2022-09-14	10:45:09	-0.094847	-0.421898	282.807	FALSE	7
2022-09-14	10:45:10	-0.0365773	-0.162703	292.861	FALSE	7
2022-09-14	10:45:10	-0.157544	-0.700787	282.807	FALSE	7
2022-09-14	10:45:10	0.0193514	0.0860789	292.947	FALSE	7
2022-09-14	10:45:10	0.0213361	0.0949072	282.902	FALSE	7
2022-09-14	10:45:11	0.360725	1.60458	294.552	FALSE	7
2022-09-14	10:45:11	0.216094	0.961229	283.863	FALSE	7
2022-09-14	10:45:11	0.431718	1.92037	296.472	FALSE	7
2022-09-14	10:45:11	0.291921	1.29852	285.162	FALSE	7
2022-09-14	10:45:12	0.383422	1.70554	298.178	FALSE	7
2022-09-14	10:45:12	0.225407	1.00266	286.164	FALSE	7
2022-09-14	10:45:12	0.179097	0.796659	298.974	FALSE	7
2022-09-14	10:45:13	0.542659	2.41386	288.578	FALSE	7
2022-09-14	10:45:13	0.731819	3.25528	302.23	FALSE	7
2022-09-14	10:45:13	0.917315	4.0804	292.659	FALSE	7
2022-09-14	10:45:13	0.76327	3.39518	305.625	FALSE	7
2022-09-14	10:45:14	1.15925	5.15658	297.815	FALSE	7
2022-09-14	10:45:14	1.55497	6.91682	312.542	FALSE	7
2022-09-14	10:45:14	1.92078	8.54401	306.359	FALSE	7
2022-09-14	10:45:14	1.77426	7.89226	320.434	FALSE	7
2022-09-14	10:45:15	1.42383	6.33348	312.693	FALSE	7
2022-09-14	10:45:15	0.814109	3.62132	324.055	FALSE	7
2022-09-14	10:45:15	0.70271	3.12579	315.818	FALSE	7
2022-09-14	10:45:15	0.803982	3.57627	327.632	FALSE	7
2022-09-14	10:45:16	0.712277	3.16835	318.987	FALSE	7
2022-09-14	10:45:16	0.640827	2.85053	330.482	FALSE	7
2022-09-14	10:45:16	0.620522	2.76021	321.747	FALSE	7
2022-09-14	10:45:17	0.622913	2.77084	333.253	FALSE	7
2022-09-14	10:45:17	0.647952	2.88222	324.629	FALSE	7
2022-09-14	10:45:17	0.624542	2.77809	336.031	FALSE	7
2022-09-14	10:45:17	0.626883	2.7885	327.418	FALSE	7
2022-09-14	10:45:18	0.742354	3.30214	339.333	FALSE	7
2022-09-14	10:45:18	0.78958	3.51221	330.93	FALSE	7
2022-09-14	10:45:18	0.874059	3.88799	343.221	FALSE	7
2022-09-14	10:45:18	1.01279	4.50509	335.435	FALSE	7
2022-09-14	10:45:19	0.948919	4.22098	347.442	FALSE	7
2022-09-14	10:45:19	0.736145	3.27452	338.709	FALSE	7
2022-09-14	10:45:19	0.660166	2.93655	350.379	FALSE	7
2022-09-14	10:45:19	0.603015	2.68233	341.392	FALSE	7
2022-09-14	10:45:20	0.587646	2.61397	352.993	FALSE	7
2022-09-14	10:45:20	0.586985	2.61103	344.003	FALSE	7
2022-09-14	10:45:20	0.708664	3.15228	356.145	FALSE	7
2022-09-14	10:45:21	1.06083	4.71878	348.722	FALSE	7
2022-09-14	10:45:21	1.47253	6.55011	362.695	FALSE	7
2022-09-14	10:45:21	1.62877	7.24509	355.967	FALSE	7
2022-09-14	10:45:21	1.46368	6.51074	369.206	FALSE	7
2022-09-14	10:45:22	1.36505	6.07202	362.039	FALSE	7
2022-09-14	10:45:22	0.993448	4.41906	373.625	FALSE	7
2022-09-14	10:45:22	0.774873	3.44679	365.486	FALSE	7
2022-09-14	10:45:22	0.761488	3.38725	377.012	FALSE	7
2022-09-14	10:45:23	0.702099	3.12308	368.609	FALSE	7
2022-09-14	10:45:23	0.765509	3.40514	380.417	FALSE	7
2022-09-14	10:45:23	0.173295	0.770851	369.379	FALSE	7
2022-09-14	10:45:23	0.186578	0.829936	381.247	FALSE	7
2022-09-14	10:45:24	0.200115	0.890152	370.27	FALSE	7
2022-09-14	10:45:24	0.710598	3.16088	384.408	FALSE	7
2022-09-14	10:45:24	0.703575	3.12964	373.399	FALSE	7
2022-09-14	10:45:25	0.658791	2.93043	387.338	FALSE	7
2022-09-14	10:45:25	0.644237	2.8657	376.265	FALSE	7
2022-09-14	10:45:25	0.759605	3.37887	390.717	FALSE	7
2022-09-14	10:45:25	0.775229	3.44837	379.713	FALSE	7
2022-09-14	10:45:26	0.633448	2.8177	393.535	FALSE	7
2022-09-14	10:45:26	0.729428	3.24464	382.958	FALSE	7
2022-09-14	10:45:26	0.714058	3.17627	396.711	FALSE	7
2022-09-14	10:45:26	0.677773	3.01487	385.973	FALSE	7
2022-09-14	10:45:27	0.677773	3.01487	399.726	FALSE	7
2022-09-14	10:45:27	0.689936	3.06897	389.042	FALSE	7
2022-09-14	10:45:27	0.6593	2.9327	402.659	FALSE	7
2022-09-14	10:45:27	0.651005	2.8958	391.938	FALSE	7
2022-09-14	10:45:28	0.637722	2.83672	405.496	FALSE	7
2022-09-14	10:45:28	0.590954	2.62868	394.566	FALSE	7
2022-09-14	10:45:28	0.614415	2.73304	408.229	FALSE	7
2022-09-14	10:45:29	0.616807	2.74368	397.31	FALSE	7
2022-09-14	10:45:29	0.523626	2.32919	410.558	FALSE	7
2022-09-14	10:45:29	0.55187	2.45483	399.765	FALSE	7
2022-09-14	10:45:29	0.393448	1.75014	412.308	FALSE	7
2022-09-14	10:45:30	0.400064	1.77956	401.544	FALSE	7
2022-09-14	10:45:30	0.23986	1.06695	413.375	FALSE	7
2022-09-14	10:45:30	0.0500893	0.222807	401.767	FALSE	7
2022-09-14	10:45:30	-0.106501	-0.473738	413.375	FALSE	7
2022-09-14	10:45:31	-0.144771	-0.64397	401.767	FALSE	7
2022-09-14	10:45:31	0.621845	2.76609	416.141	FALSE	7
2022-09-14	10:45:31	0.619555	2.7559	404.523	FALSE	7
2022-09-14	10:45:31	0.459555	2.04419	418.185	FALSE	7
2022-09-14	10:45:32	0.597061	2.65585	407.179	FALSE	7
2022-09-14	10:45:32	0.747646	3.32568	421.511	FALSE	7
2022-09-14	10:45:32	0.462049	2.05529	409.234	FALSE	7
2022-09-14	10:45:33	0.797723	3.54843	425.059	FALSE	7
2022-09-14	10:45:33	1.17548	5.22877	414.463	FALSE	7
2022-09-14	10:45:33	1.09996	4.89284	429.952	FALSE	7
2022-09-14	10:45:33	1.61645	7.19029	421.653	FALSE	7
2022-09-14	10:45:34	1.87472	8.33913	438.291	FALSE	7
2022-09-14	10:45:34	2.2077	9.82029	431.474	FALSE	7
2022-09-14	10:45:34	2.85732	12.7099	451.001	FALSE	7
2022-09-14	10:45:34	1.87686	8.34865	439.822	FALSE	7
2022-09-14	10:45:35	1.95248	8.68502	459.686	FALSE	7
2022-09-14	10:45:35	1.68953	7.51537	447.338	FALSE	7
2022-09-14	10:45:35	1.44938	6.44713	466.133	FALSE	7
2022-09-14	10:45:35	1.32927	5.91286	453.25	FALSE	7
2022-09-14	10:45:36	1.21228	5.39246	471.526	FALSE	7
2022-09-14	10:45:36	1.33681	5.9464	459.197	FALSE	7
2022-09-14	10:45:36	1.69864	7.55589	479.082	FALSE	7
2022-09-14	10:45:37	1.65212	7.34896	466.546	FALSE	7
2022-09-14	10:45:37	2.01411	8.95916	488.041	FALSE	7
2022-09-14	10:45:37	2.42765	10.7987	477.344	FALSE	7
2022-09-14	10:45:37	2.61874	11.6487	499.69	FALSE	7
2022-09-14	10:45:38	3.72189	16.5557	493.9	1	8
2022-09-14	10:45:38	4.61034	20.5077	520.197	1	9
2022-09-14	10:45:38	4.51258	20.0729	513.973	1	10
2022-09-14	10:45:38	3.24474	14.4333	534.631	1	11
2022-09-14	10:45:39	2.43996	10.8534	524.826	FALSE	11
2022-09-14	10:45:39	1.74485	7.76144	542.392	FALSE	11
2022-09-14	10:45:39	1.18877	5.28789	530.114	FALSE	11
2022-09-14	10:45:39	1.24246	5.52671	547.919	FALSE	11
2022-09-14	10:45:40	1.78622	7.94546	538.06	FALSE	11
2022-09-14	10:45:40	2.53604	11.2808	559.2	FALSE	11
2022-09-14	10:45:40	2.3481	10.4448	548.505	FALSE	11
2022-09-14	10:45:41	1.47019	6.5397	565.739	FALSE	11
2022-09-14	10:45:41	0.924236	4.11119	552.616	FALSE	11
2022-09-14	10:45:41	0.882506	3.92556	569.665	FALSE	11
2022-09-14	10:45:41	0.79701	3.54526	556.161	FALSE	11
2022-09-14	10:45:42	0.896603	3.98827	573.653	FALSE	11
2022-09-14	10:45:42	0.904746	4.02449	560.186	FALSE	11
2022-09-14	10:45:42	0.922354	4.10282	577.756	FALSE	11
2022-09-14	10:45:42	0.876298	3.89795	564.084	FALSE	11
2022-09-14	10:45:43	0.786578	3.49886	581.255	FALSE	11
2022-09-14	10:45:43	0.888104	3.95046	568.034	FALSE	11
2022-09-14	10:45:43	1.08668	4.83377	586.088	FALSE	11
2022-09-14	10:45:43	1.04449	4.6461	572.68	FALSE	11
2022-09-14	10:45:44	1.03218	4.59134	590.68	FALSE	11
2022-09-14	10:45:44	1.10475	4.91415	577.594	FALSE	11
2022-09-14	10:45:44	1.03243	4.59246	595.272	FALSE	11
2022-09-14	10:45:45	0.875127	3.89274	581.487	FALSE	11
2022-09-14	10:45:45	0.964338	4.28957	599.562	FALSE	11
2022-09-14	10:45:45	1.03289	4.5945	586.081	FALSE	11
2022-09-14	10:45:45	0.86846	3.86308	603.425	FALSE	11
2022-09-14	10:45:46	0.679046	3.02053	589.102	FALSE	11
2022-09-14	10:45:46	0.522913	2.32602	605.751	FALSE	11
2022-09-14	10:45:46	0.476298	2.11867	591.221	FALSE	11
2022-09-14	10:45:46	0.524542	2.33327	608.084	FALSE	11
2022-09-14	10:45:47	0.740623	3.29444	594.515	FALSE	11
2022-09-14	10:45:47	1.01757	4.52635	612.611	FALSE	11
2022-09-14	10:45:47	1.43187	6.36924	600.884	FALSE	11
2022-09-14	10:45:47	2.3681	10.5338	623.144	FALSE	11
2022-09-14	10:45:48	2.08261	9.26387	610.148	FALSE	11
2022-09-14	10:45:48	2.04408	9.09248	632.237	FALSE	11
2022-09-14	10:45:48	1.86765	8.30768	618.456	FALSE	11
2022-09-14	10:45:48	1.47966	6.58182	638.819	FALSE	11
2022-09-14	10:45:49	1.38144	6.14492	624.601	FALSE	11
2022-09-14	10:45:49	1.73477	7.7166	646.535	FALSE	11
2022-09-14	10:45:49	1.391	6.18745	630.788	FALSE	11
2022-09-14	10:45:50	1.41798	6.30746	652.843	FALSE	11
2022-09-14	10:45:50	1.49187	6.63614	637.424	FALSE	11
2022-09-14	10:45:50	1.71523	7.62969	660.472	FALSE	11
2022-09-14	10:45:50	1.58327	7.0427	644.467	FALSE	11
2022-09-14	10:45:51	1.58892	7.06783	667.54	FALSE	11
2022-09-14	10:45:51	1.65136	7.34558	651.813	FALSE	11
2022-09-14	10:45:51	1.53268	6.81767	674.358	FALSE	11
2022-09-14	10:45:51	1.6279	7.24122	659.054	FALSE	11
2022-09-14	10:45:52	1.69391	7.53485	681.893	FALSE	11
2022-09-14	10:45:52	1.75141	7.79062	666.845	FALSE	11
2022-09-14	10:45:52	1.72179	7.65887	689.552	FALSE	11
2022-09-14	10:45:52	1.75899	7.82434	674.669	FALSE	11
2022-09-14	10:45:53	1.48551	6.60785	696.159	FALSE	11
2022-09-14	10:45:53	1.34576	5.98621	680.655	FALSE	11
2022-09-14	10:45:53	1.14439	5.09048	701.25	FALSE	11
2022-09-14	10:45:54	1.19421	5.31208	685.967	FALSE	11
2022-09-14	10:45:54	0.834313	3.71119	704.961	FALSE	11
2022-09-14	10:45:54	1.09004	4.84872	690.816	FALSE	11
2022-09-14	10:45:54	0.976094	4.34186	709.303	FALSE	11
2022-09-14	10:45:55	1.31401	5.84498	696.661	FALSE	11
2022-09-14	10:45:55	1.13905	5.06672	714.37	FALSE	11
2022-09-14	10:45:55	0.869377	3.86716	700.528	FALSE	11
2022-09-14	10:45:55	0.789479	3.51176	717.881	FALSE	11
2022-09-14	10:45:56	0.588613	2.61827	703.146	FALSE	11
2022-09-14	10:45:56	0.460827	2.04985	719.931	FALSE	11
2022-09-14	10:45:56	0.38612	1.71754	704.864	FALSE	11
2022-09-14	10:45:56	0.245611	1.09253	721.024	FALSE	11
2022-09-14	10:45:57	0.221081	0.983413	705.847	FALSE	11
2022-09-14	10:45:57	-0.14528	-0.646234	721.024	FALSE	11
2022-09-14	10:45:57	-0.580089	-2.58035	705.847	FALSE	11
2022-09-14	10:45:58	0.413702	1.84023	722.864	FALSE	11
2022-09-14	10:45:58	-0.304262	-1.35342	705.847	FALSE	11
2022-09-14	10:45:58	-0.380445	-1.6923	722.864	FALSE	11
2022-09-14	10:45:58	-0.516323	-2.29671	705.847	FALSE	11
2022-09-14	10:45:59	-0.617544	-2.74696	722.864	FALSE	11
2022-09-14	10:45:59	-0.619732	-2.75669	705.847	FALSE	11
2022-09-14	10:45:59	-0.70645	-3.14243	722.864	FALSE	11
2022-09-14	10:45:59	-0.761259	-3.38623	705.847	FALSE	11
2022-09-14	10:46:00	-0.770317	-3.42652	722.864	FALSE	11
2022-09-14	10:46:00	-0.691895	-3.07769	705.847	FALSE	11
2022-09-14	10:46:00	-0.638206	-2.83887	722.864	FALSE	11
2022-09-14	10:46:00	-0.780903	-3.47361	705.847	FALSE	11
2022-09-14	10:46:01	-0.85673	-3.81091	722.864	FALSE	11
2022-09-14	10:46:01	-0.838205	-3.7285	705.847	FALSE	11
2022-09-14	10:46:01	-0.787162	-3.50145	722.864	FALSE	11
2022-09-14	10:46:02	-0.826908	-3.67825	705.847	FALSE	11
2022-09-14	10:46:02	-0.749503	-3.33394	722.864	FALSE	11
2022-09-14	10:46:02	-0.760241	-3.3817	705.847	FALSE	11
2022-09-14	10:46:02	-0.657086	-2.92285	722.864	FALSE	11
2022-09-14	10:46:03	-0.657493	-2.92466	705.847	FALSE	11
2022-09-14	10:46:03	-0.418206	-1.86026	722.864	FALSE	11
2022-09-14	10:46:03	-0.301666	-1.34187	705.847	FALSE	11
2022-09-14	10:46:03	-0.0709793	-0.31573	722.864	FALSE	11
2022-09-14	10:46:04	0.0339061	0.150821	705.998	FALSE	11
2022-09-14	10:46:04	0.199046	0.885396	723.749	FALSE	11
2022-09-14	10:46:04	0.223372	0.993603	706.992	FALSE	11
2022-09-14	10:46:04	0.475026	2.11301	725.862	FALSE	11
2022-09-14	10:46:05	0.5907	2.62755	709.619	FALSE	11
2022-09-14	10:46:05	0.638842	2.8417	728.704	FALSE	11
2022-09-14	10:46:05	1.02495	4.55918	714.178	FALSE	11
2022-09-14	10:46:06	0.413295	1.83842	730.543	FALSE	11
2022-09-14	10:46:06	0.430802	1.91629	716.095	FALSE	11
2022-09-14	10:46:06	0.295789	1.31573	731.858	FALSE	11
2022-09-14	10:46:06	0.243728	1.08415	717.179	FALSE	11
2022-09-14	10:46:07	0.299097	1.33044	733.189	FALSE	11
2022-09-14	10:46:07	0.14729	0.655175	717.834	FALSE	11
2022-09-14	10:46:07	0.259962	1.15636	734.345	FALSE	11
2022-09-14	10:46:07	0.101234	0.450309	718.284	FALSE	11
2022-09-14	10:46:08	0.269377	1.19824	735.543	FALSE	11
2022-09-14	10:46:08	0.0155346	0.069101	718.353	FALSE	11
2022-09-14	10:46:08	0.238079	1.05902	736.602	FALSE	11
2022-09-14	10:46:08	0.0653565	0.290719	718.644	FALSE	11
2022-09-14	10:46:09	0.123779	0.550594	737.153	FALSE	11
2022-09-14	10:46:09	0.00433869	0.0192994	718.663	FALSE	11
2022-09-14	10:46:09	0.169631	0.754553	737.908	FALSE	11
2022-09-14	10:46:10	0.0322267	0.143351	718.807	FALSE	11
2022-09-14	10:46:10	0.0816923	0.363384	738.271	FALSE	11
2022-09-14	10:46:10	-0.0978496	-0.435255	718.807	FALSE	11
2022-09-14	10:46:10	0.037214	0.165535	738.436	FALSE	11
2022-09-14	10:46:11	-0.0968317	-0.430727	718.807	FALSE	11
2022-09-14	10:46:11	0.0319723	0.142219	738.579	FALSE	11
2022-09-14	10:46:11	-0.0603941	-0.268645	718.807	FALSE	11
2022-09-14	10:46:11	0.140624	0.625524	739.204	FALSE	11
2022-09-14	10:46:12	0.0546694	0.24318	719.05	FALSE	11
2022-09-14	10:46:12	0.233906	1.04046	740.245	FALSE	11
2022-09-14	10:46:12	0.258842	1.15138	720.201	FALSE	11
2022-09-14	10:46:12	0.638232	2.83898	743.084	FALSE	11
2022-09-14	10:46:13	0.531667	2.36496	722.566	FALSE	11
2022-09-14	10:46:13	0.801692	3.56609	746.65	FALSE	11
2022-09-14	10:46:13	0.59701	2.65562	725.222	FALSE	11
2022-09-14	10:46:14	0.586119	2.60717	749.257	FALSE	11
2022-09-14	10:46:14	0.579402	2.5773	727.799	FALSE	11
2022-09-14	10:46:14	0.90729	4.03581	753.293	FALSE	11
2022-09-14	10:46:14	0.68327	3.03932	730.839	FALSE	11
2022-09-14	10:46:15	0.557315	2.47905	755.772	FALSE	11
2022-09-14	10:46:15	0.470496	2.09286	732.931	FALSE	11
2022-09-14	10:46:15	0.574822	2.55692	758.329	FALSE	11
2022-09-14	10:46:15	0.647646	2.88086	735.812	FALSE	11
2022-09-14	10:46:16	0.593651	2.64068	760.969	FALSE	11
2022-09-14	10:46:16	0.497061	2.21103	738.023	FALSE	11
2022-09-14	10:46:16	0.529071	2.35341	763.323	FALSE	11
2022-09-14	10:46:16	0.530089	2.35794	740.381	FALSE	11
2022-09-14	10:46:17	0.50327	2.23865	765.561	FALSE	11
2022-09-14	10:46:17	0.552277	2.45664	742.838	FALSE	11
2022-09-14	10:46:17	0.531056	2.36224	767.924	FALSE	11
2022-09-14	10:46:18	0.914211	4.06659	746.904	FALSE	11
2022-09-14	10:46:18	1.77309	7.88706	775.811	FALSE	11
2022-09-14	10:46:18	2.79207	12.4197	759.324	FALSE	11
2022-09-14	10:46:18	2.54006	11.2987	787.109	FALSE	11
2022-09-14	10:46:19	2.43543	10.8333	770.157	FALSE	11
2022-09-14	10:46:19	1.69762	7.55135	794.661	FALSE	11
2022-09-14	10:46:19	1.19996	5.33766	775.495	FALSE	11
2022-09-14	10:46:19	1.89126	8.4127	803.073	FALSE	11
2022-09-14	10:46:20	4.71426	20.97	796.465	1	12
2022-09-14	10:46:20	7.18179	31.946	835.02	1	13
2022-09-14	10:46:20	2.65925	11.8289	808.294	FALSE	13
2022-09-14	10:46:20	1.41274	6.28415	841.304	FALSE	13
2022-09-14	10:46:21	1.94709	8.66105	816.955	FALSE	13
2022-09-14	10:46:21	2.98581	13.2815	854.585	FALSE	13
2022-09-14	10:46:21	3.13314	13.9368	830.892	1	14
2022-09-14	10:46:22	2.20765	9.82007	864.405	FALSE	14
2022-09-14	10:46:22	2.21726	9.86282	840.755	FALSE	14
2022-09-14	10:46:22	2.1791	9.69307	874.098	FALSE	14
2022-09-14	10:46:22	2.34877	10.4478	851.202	FALSE	14
2022-09-14	10:46:23	1.9505	8.67621	882.775	FALSE	14
2022-09-14	10:46:23	1.57711	7.0153	858.218	FALSE	14
2022-09-14	10:46:23	1.46419	6.51301	889.288	FALSE	14
2022-09-14	10:46:23	1.14195	5.07962	863.297	FALSE	14
2022-09-14	10:46:24	0.727748	3.23717	892.525	FALSE	14
2022-09-14	10:46:24	1.08454	4.82425	868.122	FALSE	14
2022-09-14	10:46:24	2.10393	9.3587	901.883	FALSE	14
2022-09-14	10:46:24	1.8249	8.11752	876.239	FALSE	14
2022-09-14	10:46:25	2.84032	12.6343	914.518	FALSE	14
2022-09-14	10:46:25	2.60286	11.578	887.817	FALSE	14
2022-09-14	10:46:25	1.82744	8.12882	922.647	FALSE	14
2022-09-14	10:46:25	1.68861	7.51128	895.328	FALSE	14
2022-09-14	10:46:26	1.43981	6.40456	929.051	FALSE	14
2022-09-14	10:46:26	1.16347	5.17535	900.504	FALSE	14
2022-09-14	10:46:26	1.23808	5.50723	934.558	FALSE	14
2022-09-14	10:46:27	1.15131	5.12126	905.625	FALSE	14
2022-09-14	10:46:27	1.32643	5.90023	940.459	FALSE	14
2022-09-14	10:46:27	1.40352	6.24314	911.868	FALSE	14
2022-09-14	10:46:27	1.38429	6.1576	946.616	FALSE	14
2022-09-14	10:46:28	1.41111	6.2769	918.145	FALSE	14
2022-09-14	10:46:28	1.32357	5.8875	952.504	FALSE	14
2022-09-14	10:46:28	1.23966	5.51426	923.659	FALSE	14
2022-09-14	10:46:28	1.30581	5.8085	958.312	FALSE	14
2022-09-14	10:46:29	1.13416	5.04497	928.704	FALSE	14
2022-09-14	10:46:29	1.12301	4.99537	963.308	FALSE	14
2022-09-14	10:46:29	0.749733	3.33496	932.039	FALSE	14
2022-09-14	10:46:29	0.348868	1.55183	964.859	FALSE	14
2022-09-14	10:46:30	0.185	0.822917	932.862	FALSE	14
2022-09-14	10:46:30	-0.00695905	-0.0309552	964.859	FALSE	14
2022-09-14	10:46:30	-0.087417	-0.388848	932.862	FALSE	14
2022-09-14	10:46:31	-0.171743	-0.763947	964.859	FALSE	14
2022-09-14	10:46:31	-0.277341	-1.23367	932.862	FALSE	14
2022-09-14	10:46:31	-0.254185	-1.13067	964.859	FALSE	14
2022-09-14	10:46:31	-0.22701	-1.00979	932.862	FALSE	14
2022-09-14	10:46:32	-0.414796	-1.8451	964.859	FALSE	14
2022-09-14	10:46:32	-0.434083	-1.93089	932.862	FALSE	14
2022-09-14	10:46:32	-0.236221	-1.05076	964.859	FALSE	14
2022-09-14	10:46:32	-0.0279768	-0.124446	932.862	FALSE	14
2022-09-14	10:46:33	-0.0588674	-0.261854	964.859	FALSE	14
2022-09-14	10:46:33	0.594364	2.64385	935.506	FALSE	14
2022-09-14	10:46:33	1.60195	7.12579	971.985	FALSE	14
2022-09-14	10:46:33	2.21808	9.86646	945.373	FALSE	14
2022-09-14	10:46:34	0.453804	2.01861	974.004	FALSE	14
2022-09-14	10:46:34	0.441234	1.9627	947.335	FALSE	14
2022-09-14	10:46:34	0.402354	1.78975	975.794	FALSE	14
2022-09-14	10:46:35	0.264644	1.17719	948.512	FALSE	14
2022-09-14	10:46:35	0.234364	1.0425	976.836	FALSE	14
2022-09-14	10:46:35	0.22556	1.00334	949.516	FALSE	14
2022-09-14	10:46:35	0.151921	0.675775	977.512	FALSE	14
2022-09-14	10:46:36	0.0140078	0.0623095	949.578	FALSE	14
2022-09-14	10:46:36	0.367697	1.63559	979.147	FALSE	14
2022-09-14	10:46:36	0.233906	1.04046	950.619	FALSE	14
2022-09-14	10:46:36	0.0962979	0.428352	979.576	FALSE	14
2022-09-14	10:46:37	0.52332	2.32783	952.946	FALSE	14
2022-09-14	10:46:37	0.484135	2.15353	981.729	FALSE	14
2022-09-14	10:46:37	1.00581	4.47404	957.42	FALSE	14
2022-09-14	10:46:37	0.661438	2.94221	984.671	FALSE	14
2022-09-14	10:46:38	0.735382	3.27113	960.692	FALSE	14
2022-09-14	10:46:38	0.559707	2.48969	987.161	FALSE	14
2022-09-14	10:46:38	0.733601	3.2632	963.955	FALSE	14
2022-09-14	10:46:39	0.735076	3.26977	990.431	FALSE	14
2022-09-14	10:46:39	0.732735	3.25935	967.214	FALSE	14
2022-09-14	10:46:39	0.73472	3.26818	993.699	FALSE	14
2022-09-14	10:46:39	0.739911	3.29127	970.505	FALSE	14
2022-09-14	10:46:40	0.733295	3.26184	996.961	FALSE	14
2022-09-14	10:46:40	0.734466	3.26705	973.772	FALSE	14
2022-09-14	10:46:40	1.71248	7.61745	1004.58	FALSE	14
2022-09-14	10:46:40	0.244033	1.08551	974.858	FALSE	14
2022-09-14	10:46:41	0.0237788	0.105773	1004.68	FALSE	14
2022-09-14	10:46:41	-0.0162211	-0.0721547	974.858	FALSE	14
2022-09-14	10:46:41	0.62215	2.76745	1007.45	FALSE	14
2022-09-14	10:46:41	0.735585	3.27203	978.13	FALSE	14
2022-09-14	10:46:42	1.37762	6.12793	1013.58	FALSE	14
2022-09-14	10:46:42	2.82357	12.5598	990.69	FALSE	14
2022-09-14	10:46:42	2.58759	11.5101	1025.09	FALSE	14
2022-09-14	10:46:43	2.12123	9.43566	1000.13	FALSE	14
2022-09-14	10:46:43	1.34724	5.99279	1031.08	FALSE	14
2022-09-14	10:46:43	1.18597	5.27543	1005.4	FALSE	14
2022-09-14	10:46:43	0.690954	3.0735	1034.16	FALSE	14
2022-09-14	10:46:44	0.523728	2.32965	1007.73	FALSE	14
2022-09-14	10:46:44	0.459198	2.0426	1036.2	FALSE	14
2022-09-14	10:46:44	0.441336	1.96315	1009.69	FALSE	14
2022-09-14	10:46:44	0.399249	1.77594	1037.97	FALSE	14
2022-09-14	10:46:45	0.381489	1.69694	1011.39	FALSE	14
2022-09-14	10:46:45	0.336959	1.49886	1039.47	FALSE	14
2022-09-14	10:46:45	0.505509	2.24861	1013.64	FALSE	14
2022-09-14	10:46:45	0.360827	1.60503	1041.08	FALSE	14
2022-09-14	10:46:46	0.657773	2.92591	1016.57	FALSE	14
2022-09-14	10:46:46	0.395433	1.75897	1042.84	FALSE	14
2022-09-14	10:46:46	0.652684	2.90327	1019.47	FALSE	14
2022-09-14	10:46:47	0.415229	1.84702	1044.68	FALSE	14
2022-09-14	10:46:47	0.744745	3.31277	1022.78	FALSE	14
2022-09-14	10:46:47	0.462557	2.05755	1046.74	FALSE	14
2022-09-14	10:46:47	0.854313	3.80016	1026.58	FALSE	14
2022-09-14	10:46:48	0.661896	2.94425	1049.69	FALSE	14
2022-09-14	10:46:48	0.707392	3.14662	1029.73	FALSE	14
2022-09-14	10:46:48	0.659606	2.93406	1052.62	FALSE	14
2022-09-14	10:46:48	0.567901	2.52614	1032.25	FALSE	14
2022-09-14	10:46:49	0.528053	2.34889	1054.97	FALSE	14
2022-09-14	10:46:49	0.485662	2.16032	1034.41	FALSE	14
2022-09-14	10:46:49	0.532226	2.36745	1057.34	FALSE	14
2022-09-14	10:46:49	0.67696	3.01125	1037.43	FALSE	14
2022-09-14	10:46:50	0.581438	2.58635	1059.92	FALSE	14
2022-09-14	10:46:50	0.570751	2.53881	1039.96	FALSE	14
2022-09-14	10:46:50	0.387392	1.7232	1061.65	FALSE	14
2022-09-14	10:46:51	0.375891	1.67204	1041.64	FALSE	14
2022-09-14	10:46:51	0.321132	1.42846	1063.07	FALSE	14
2022-09-14	10:46:51	0.309173	1.37526	1043.01	FALSE	14
2022-09-14	10:46:51	0.367952	1.63672	1064.71	FALSE	14
2022-09-14	10:46:52	0.288868	1.28494	1044.3	FALSE	14
2022-09-14	10:46:52	0.352074	1.5661	1066.28	FALSE	14
2022-09-14	10:46:52	0.366985	1.63242	1045.93	FALSE	14
2022-09-14	10:46:52	0.342914	1.52535	1067.8	FALSE	14
2022-09-14	10:46:53	0.304695	1.35534	1047.28	FALSE	14
2022-09-14	10:46:53	0.301896	1.34289	1069.15	FALSE	14
2022-09-14	10:46:53	0.443982	1.97492	1049.26	FALSE	14
2022-09-14	10:46:53	0.16215	0.721276	1069.87	FALSE	14
2022-09-14	10:46:54	0.473295	2.10531	1051.36	FALSE	14
2022-09-14	10:46:54	0.249122	1.10814	1070.98	FALSE	14
2022-09-14	10:46:54	0.433244	1.92716	1053.29	FALSE	14
2022-09-14	10:46:55	0.263982	1.17424	1072.15	FALSE	14
2022-09-14	10:46:55	0.391819	1.74289	1055.03	FALSE	14
2022-09-14	10:46:55	0.42958	1.91086	1074.06	FALSE	14
2022-09-14	10:46:55	0.256705	1.14188	1056.18	FALSE	14
2022-09-14	10:46:56	0.461692	2.0537	1076.11	FALSE	14
2022-09-14	10:46:56	0.256705	1.14188	1057.32	FALSE	14
2022-09-14	10:46:56	0.498893	2.21918	1078.33	FALSE	14
2022-09-14	10:46:56	0.204746	0.910751	1058.23	FALSE	14
2022-09-14	10:46:57	0.366374	1.6297	1079.96	FALSE	14
2022-09-14	10:46:57	0.193651	0.861398	1059.09	FALSE	14
2022-09-14	10:46:57	0.385611	1.71527	1081.68	FALSE	14
2022-09-14	10:46:57	0.353957	1.57447	1060.67	FALSE	14
2022-09-14	10:46:58	0.403015	1.79269	1083.47	FALSE	14
2022-09-14	10:46:58	0.565865	2.51708	1063.18	FALSE	14
2022-09-14	10:46:58	1.11859	4.97571	1088.45	FALSE	14
2022-09-14	10:46:58	2.40749	10.709	1073.89	FALSE	14
2022-09-14	10:46:59	0.63355	2.81816	1091.26	FALSE	14
2022-09-14	10:46:59	1.9108	8.49962	1082.39	FALSE	14
2022-09-14	10:46:59	0.723168	3.2168	1094.48	FALSE	14
2022-09-14	10:47:00	1.44627	6.4333	1088.82	FALSE	14
2022-09-14	10:47:00	0.820573	3.65007	1098.13	FALSE	14
2022-09-14	10:47:00	0.591921	2.63298	1091.46	FALSE	14
2022-09-14	10:47:00	0.729071	3.24305	1101.37	FALSE	14
2022-09-14	10:47:01	0.479249	2.1318	1093.59	FALSE	14
2022-09-14	10:47:01	0.765611	3.40559	1104.78	FALSE	14
2022-09-14	10:47:01	0.933499	4.15239	1097.74	FALSE	14
2022-09-14	10:47:01	1.75014	7.78497	1112.57	FALSE	14
2022-09-14	10:47:02	0.835484	3.7164	1101.46	FALSE	14
2022-09-14	10:47:02	0.78159	3.47667	1116.04	FALSE	14
2022-09-14	10:47:02	0.461387	2.05234	1103.51	FALSE	14
2022-09-14	10:47:02	0.502964	2.23728	1118.28	FALSE	14
2022-09-14	10:47:03	0.335178	1.49094	1105	FALSE	14
2022-09-14	10:47:03	0.372125	1.65529	1119.93	FALSE	14
2022-09-14	10:47:03	0.321183	1.42869	1106.43	FALSE	14
2022-09-14	10:47:04	0.325865	1.44951	1121.38	FALSE	14
2022-09-14	10:47:04	0.443677	1.97356	1108.4	FALSE	14
2022-09-14	10:47:04	0.16897	0.751612	1122.14	FALSE	14
2022-09-14	10:47:04	0.448562	1.99529	1110.4	FALSE	14
2022-09-14	10:47:05	0.205713	0.915053	1123.05	FALSE	14
2022-09-14	10:47:05	0.524848	2.33463	1112.73	FALSE	14
2022-09-14	10:47:05	0.534618	2.37809	1125.43	FALSE	14
2022-09-14	10:47:05	0.711412	3.1645	1115.9	FALSE	14
2022-09-14	10:47:06	0.734924	3.26909	1128.7	FALSE	14
2022-09-14	10:47:06	0.704084	3.13191	1119.03	FALSE	14
2022-09-14	10:47:06	0.719453	3.20027	1131.9	FALSE	14
2022-09-14	10:47:06	1.47009	6.53925	1125.57	FALSE	14
2022-09-14	10:47:07	0.70388	3.131	1135.03	FALSE	14
2022-09-14	10:47:07	0.72444	3.22245	1128.79	FALSE	14
2022-09-14	10:47:07	0.699809	3.11289	1138.14	FALSE	14
2022-09-14	10:47:08	0.729682	3.24577	1132.04	FALSE	14
2022-09-14	10:47:08	0.708003	3.14934	1141.29	FALSE	14
2022-09-14	10:47:08	0.708715	3.15251	1135.19	FALSE	14
2022-09-14	10:47:08	0.698995	3.10927	1144.4	FALSE	14
2022-09-14	10:47:09	0.730547	3.24962	1138.44	FALSE	14
2022-09-14	10:47:09	0.701489	3.12036	1147.52	FALSE	14
2022-09-14	10:47:09	0.678995	3.02031	1141.46	FALSE	14
2022-09-14	10:47:09	0.616145	2.74074	1150.26	FALSE	14
2022-09-14	10:47:10	0.722252	3.21272	1144.67	FALSE	14
2022-09-14	10:47:10	0.740674	3.29467	1153.56	FALSE	14
2022-09-14	10:47:10	0.722862	3.21543	1147.89	FALSE	14
2022-09-14	10:47:10	0.728715	3.24147	1156.8	FALSE	14
2022-09-14	10:47:11	0.733499	3.26275	1151.15	FALSE	14
2022-09-14	10:47:11	0.736807	3.27746	1160.08	FALSE	14
2022-09-14	10:47:11	0.726781	3.23287	1154.38	FALSE	14
2022-09-14	10:47:12	0.734109	3.26546	1163.34	FALSE	14
2022-09-14	10:47:12	0.733448	3.26252	1157.65	FALSE	14
2022-09-14	10:47:12	0.737672	3.28131	1166.62	FALSE	14
2022-09-14	10:47:12	0.685509	3.04928	1160.7	FALSE	14
2022-09-14	10:47:13	0.807086	3.59008	1170.21	FALSE	14
2022-09-14	10:47:13	0.241743	1.07532	1161.77	FALSE	14
2022-09-14	10:47:13	0.0564506	0.251104	1170.46	FALSE	14
2022-09-14	10:47:13	0.583321	2.59473	1164.37	FALSE	14
2022-09-14	10:47:14	0.352328	1.56723	1172.03	FALSE	14
2022-09-14	10:47:14	0.0751783	0.334408	1164.7	FALSE	14
2022-09-14	10:47:14	-0.0741855	-0.329992	1172.03	FALSE	14
2022-09-14	10:47:14	-0.369198	-1.64227	1164.7	FALSE	14
2022-09-14	10:47:15	-0.686959	-3.05573	1172.03	FALSE	14
2022-09-14	10:47:15	-0.790877	-3.51798	1164.7	FALSE	14
2022-09-14	10:47:15	0.0633717	0.28189	1172.31	FALSE	14
2022-09-14	10:47:16	1.0076	4.48201	1169.18	FALSE	14
2022-09-14	10:47:16	1.21447	5.40221	1177.71	FALSE	14
2022-09-14	10:47:16	2.24714	9.99573	1179.18	FALSE	14
2022-09-14	10:47:16	2.3506	10.4559	1188.17	FALSE	14
2022-09-14	10:47:17	2.00841	8.93381	1188.11	FALSE	14
2022-09-14	10:47:17	1.46734	6.52702	1194.7	FALSE	14
2022-09-14	10:47:17	0.736501	3.2761	1191.39	FALSE	14
2022-09-14	10:47:17	0.7707	3.42823	1198.13	FALSE	14
2022-09-14	10:47:18	0.706832	3.14413	1194.53	FALSE	14
2022-09-14	10:47:18	0.775992	3.45177	1201.58	FALSE	14
2022-09-14	10:47:18	0.640165	2.84758	1197.38	FALSE	14
2022-09-14	10:47:18	0.746171	3.31912	1204.9	FALSE	14
2022-09-14	10:47:19	0.731768	3.25505	1200.63	FALSE	14
2022-09-14	10:47:19	0.729835	3.24645	1208.14	FALSE	14
2022-09-14	10:47:19	0.736908	3.27791	1203.91	FALSE	14
2022-09-14	10:47:20	0.73416	3.26569	1211.41	FALSE	14
2022-09-14	10:47:20	0.736094	3.27429	1207.19	FALSE	14
2022-09-14	10:47:20	0.735229	3.27045	1214.68	FALSE	14
2022-09-14	10:47:20	0.727137	3.23445	1210.42	FALSE	14
2022-09-14	10:47:21	0.74841	3.32908	1218.01	FALSE	14
2022-09-14	10:47:21	0.708257	3.15047	1213.57	FALSE	14
2022-09-14	10:47:21	0.69874	3.10814	1221.12	FALSE	14
2022-09-14	10:47:21	0.526476	2.34187	1215.91	FALSE	14
2022-09-14	10:47:22	0.538232	2.39416	1223.51	FALSE	14
2022-09-14	10:47:22	0.578435	2.57299	1218.49	FALSE	14
2022-09-14	10:47:22	0.932837	4.14945	1227.66	FALSE	14
2022-09-14	10:47:22	1.27106	5.65393	1224.14	FALSE	14
2022-09-14	10:47:23	1.41172	6.27961	1233.94	FALSE	14
2022-09-14	10:47:23	0.939453	4.17887	1228.32	FALSE	14
2022-09-14	10:47:23	0.730343	3.24871	1237.19	FALSE	14
2022-09-14	10:47:24	0.733346	3.26207	1231.58	FALSE	14
2022-09-14	10:47:24	0.743982	3.30938	1240.5	FALSE	14
2022-09-14	10:47:24	0.736399	3.27565	1234.86	FALSE	14
2022-09-14	10:47:24	0.737214	3.27928	1243.78	FALSE	14
2022-09-14	10:47:25	0.671005	2.98476	1237.84	FALSE	14
2022-09-14	10:47:25	0.59243	2.63525	1246.41	FALSE	14
2022-09-14	10:47:25	0.735789	3.27294	1241.11	FALSE	14
2022-09-14	10:47:25	0.726629	3.23219	1249.64	FALSE	14
2022-09-14	10:47:26	0.736196	3.27475	1244.39	FALSE	14
2022-09-14	10:47:26	0.734568	3.26751	1252.91	FALSE	14
2022-09-14	10:47:26	0.729631	3.24554	1247.63	FALSE	14
2022-09-14	10:47:27	0.730547	3.24962	1256.16	FALSE	14
2022-09-14	10:47:27	0.734822	3.26864	1250.9	FALSE	14
2022-09-14	10:47:27	0.731463	3.25369	1259.42	FALSE	14
2022-09-14	10:47:27	0.730954	3.25143	1254.15	FALSE	14
2022-09-14	10:47:28	0.736807	3.27746	1262.69	FALSE	14
2022-09-14	10:47:28	0.739758	3.29059	1257.45	FALSE	14
2022-09-14	10:47:28	0.737265	3.2795	1265.97	FALSE	14
2022-09-14	10:47:28	0.731616	3.25437	1260.7	FALSE	14
2022-09-14	10:47:29	0.56388	2.50825	1268.48	FALSE	14
2022-09-14	10:47:29	0.239199	1.064	1261.76	FALSE	14
2022-09-14	10:47:29	0.664338	2.95511	1271.44	FALSE	14
2022-09-14	10:47:29	0.727392	3.23559	1265	FALSE	14
2022-09-14	10:47:30	0.738995	3.2872	1274.72	FALSE	14
2022-09-14	10:47:30	0.736705	3.27701	1268.28	FALSE	14
2022-09-14	10:47:30	0.666781	2.96598	1277.69	FALSE	14
2022-09-14	10:47:30	0.557875	2.48154	1270.76	FALSE	14
2022-09-14	10:47:31	-0.708383	-3.15103	1277.69	FALSE	14
2022-09-14	10:47:31	-0.815406	-3.62709	1270.76	FALSE	14
2022-09-14	10:47:31	-0.788638	-3.50802	1277.69	FALSE	14
2022-09-14	10:47:31	-0.673829	-2.99733	1270.76	FALSE	14
2022-09-14	10:47:32	-0.674643	-3.00095	1277.69	FALSE	14
2022-09-14	10:47:32	-0.717595	-3.19201	1270.76	FALSE	14
2022-09-14	10:47:32	-1.28121	-5.69908	1277.69	FALSE	14
2022-09-14	10:47:33	-1.60991	-7.1612	1270.76	FALSE	14
2022-09-14	10:47:33	0.843779	3.7533	1281.44	FALSE	14
2022-09-14	10:47:33	0.720827	3.20638	1273.96	FALSE	14
2022-09-14	10:47:33	1.14866	5.10947	1286.55	FALSE	14
2022-09-14	10:47:34	2.48576	11.0572	1285.02	FALSE	14
2022-09-14	10:47:34	1.69925	7.5586	1294.11	FALSE	14
2022-09-14	10:47:34	0.550293	2.44781	1287.47	FALSE	14
2022-09-14	10:47:34	0.463066	2.05981	1296.17	FALSE	14
2022-09-14	10:47:35	0.424949	1.89026	1289.36	FALSE	14
2022-09-14	10:47:35	0.381692	1.69784	1297.87	FALSE	14
2022-09-14	10:47:35	0.260369	1.15817	1290.52	FALSE	14
2022-09-14	10:47:35	0.03813	0.16961	1298.04	FALSE	14
2022-09-14	10:47:36	-0.0207504	-0.0923019	1290.52	FALSE	14
2022-09-14	10:47:36	-0.141157	-0.627895	1298.04	FALSE	14
2022-09-14	10:47:36	-0.21103	-0.938704	1290.52	FALSE	14
2022-09-14	10:47:37	-0.26757	-1.1902	1298.04	FALSE	14
2022-09-14	10:47:37	-0.244414	-1.0872	1290.52	FALSE	14
2022-09-14	10:47:37	-0.262531	-1.16779	1298.04	FALSE	14
2022-09-14	10:47:37	-0.162837	-0.724332	1290.52	FALSE	14
2022-09-14	10:47:38	0.00321909	0.0143192	1298.05	FALSE	14
2022-09-14	10:47:38	0.0974684	0.433559	1290.95	FALSE	14
2022-09-14	10:47:38	0.503066	2.23774	1300.29	FALSE	14
2022-09-14	10:47:38	0.729886	3.24668	1294.2	FALSE	14
2022-09-14	10:47:39	0.735178	3.27022	1303.56	FALSE	14
2022-09-14	10:47:39	0.698638	3.10768	1297.31	FALSE	14
2022-09-14	10:47:39	0.712786	3.17061	1306.73	FALSE	14
2022-09-14	10:47:39	0.697265	3.10157	1300.41	FALSE	14
2022-09-14	10:47:40	0.717417	3.19121	1309.92	FALSE	14
2022-09-14	10:47:40	0.711056	3.16292	1303.57	FALSE	14
2022-09-14	10:47:40	0.719402	3.20004	1313.12	FALSE	14
2022-09-14	10:47:41	0.692888	3.0821	1306.65	FALSE	14
2022-09-14	10:47:41	0.664491	2.95579	1316.08	FALSE	14
2022-09-14	10:47:41	1.54246	6.86117	1313.51	FALSE	14
2022-09-14	10:47:41	4.82591	21.4666	1337.54	1	15
2022-09-14	10:47:42	5.27431	23.4612	1336.97	1	16
2022-09-14	10:47:42	4.27909	19.0342	1356.58	1	17
2022-09-14	10:47:42	4.4706	19.8861	1356.86	1	18
2022-09-14	10:47:42	5.3537	23.8143	1380.39	1	19
2022-09-14	10:47:43	3.12454	13.8986	1370.76	1	20
2022-09-14	10:47:43	3.49197	15.533	1395.93	1	21
2022-09-14	10:47:43	3.18098	14.1496	1384.91	1	22
2022-09-14	10:47:43	1.82719	8.12771	1404.05	FALSE	22
2022-09-14	10:47:44	0.710293	3.15953	1388.07	FALSE	22
2022-09-14	10:47:44	0.519555	2.31108	1406.36	FALSE	22
2022-09-14	10:47:44	0.583677	2.59631	1390.66	FALSE	22
2022-09-14	10:47:45	0.741794	3.29965	1409.66	FALSE	22
2022-09-14	10:47:45	0.744339	3.31097	1393.98	FALSE	22
2022-09-14	10:47:45	0.737112	3.27882	1412.94	FALSE	22
2022-09-14	10:47:45	0.735076	3.26977	1397.25	FALSE	22
2022-09-14	10:47:46	0.732583	3.25868	1416.2	FALSE	22
2022-09-14	10:47:46	0.739758	3.29059	1400.54	FALSE	22
2022-09-14	10:47:46	0.730496	3.24939	1419.45	FALSE	22
2022-09-14	10:47:46	0.739758	3.29059	1403.83	FALSE	22
2022-09-14	10:47:47	0.738689	3.28584	1422.74	FALSE	22
2022-09-14	10:47:47	0.732684	3.25912	1407.09	FALSE	22
2022-09-14	10:47:47	0.732277	3.25731	1425.99	FALSE	22
2022-09-14	10:47:47	0.732379	3.25777	1410.34	FALSE	22
2022-09-14	10:47:48	0.73299	3.26049	1429.25	FALSE	22
2022-09-14	10:47:48	0.729071	3.24305	1413.59	FALSE	22
2022-09-14	10:47:48	0.739046	3.28742	1432.54	FALSE	22
2022-09-14	10:47:49	0.735483	3.27158	1416.86	FALSE	22
2022-09-14	10:47:49	0.734211	3.26592	1435.81	FALSE	22
2022-09-14	10:47:49	0.734669	3.26795	1420.13	FALSE	22
2022-09-14	10:47:49	0.732532	3.25845	1439.07	FALSE	22
2022-09-14	10:47:50	0.735585	3.27203	1423.4	FALSE	22
2022-09-14	10:47:50	0.734771	3.26841	1442.33	FALSE	22
2022-09-14	10:47:50	0.73701	3.27837	1426.68	FALSE	22
2022-09-14	10:47:50	0.735433	3.27135	1445.61	FALSE	22
2022-09-14	10:47:51	0.732074	3.25641	1429.93	FALSE	22
2022-09-14	10:47:51	0.737722	3.28154	1448.89	FALSE	22
2022-09-14	10:47:51	0.734262	3.26614	1433.2	FALSE	22
2022-09-14	10:47:51	0.734568	3.26751	1452.15	FALSE	22
2022-09-14	10:47:52	0.736654	3.27678	1436.48	FALSE	22
2022-09-14	10:47:52	0.73187	3.2555	1455.41	FALSE	22
2022-09-14	10:47:52	0.735483	3.27158	1439.75	FALSE	22
2022-09-14	10:47:53	0.739911	3.29127	1458.7	FALSE	22
2022-09-14	10:47:53	0.733295	3.26184	1443.01	FALSE	22
2022-09-14	10:47:53	0.738537	3.28516	1461.99	FALSE	22
2022-09-14	10:47:53	0.778791	3.46422	1446.47	FALSE	22
2022-09-14	10:47:54	0.567086	2.52251	1464.51	FALSE	22
2022-09-14	10:47:54	0.735382	3.27113	1449.74	FALSE	22
2022-09-14	10:47:54	0.736501	3.2761	1467.79	FALSE	22
2022-09-14	10:47:54	0.741285	3.29738	1453.04	FALSE	22
2022-09-14	10:47:55	0.737519	3.28063	1471.07	FALSE	22
2022-09-14	10:47:55	0.414873	1.84544	1454.89	FALSE	22
2022-09-14	10:47:55	0.642048	2.85596	1473.92	FALSE	22
2022-09-14	10:47:55	0.734466	3.26705	1458.15	FALSE	22
2022-09-14	10:47:56	0.732328	3.25754	1477.18	FALSE	22
2022-09-14	10:47:56	0.735433	3.27135	1461.43	FALSE	22
2022-09-14	10:47:56	0.736603	3.27656	1480.46	FALSE	22
2022-09-14	10:47:57	0.738333	3.28425	1464.71	FALSE	22
2022-09-14	10:47:57	0.350445	1.55885	1482.02	FALSE	22
2022-09-14	10:47:57	0.687188	3.05675	1467.77	FALSE	22
2022-09-14	10:47:57	0.676247	3.00808	1485.02	FALSE	22
2022-09-14	10:47:58	0.671056	2.98499	1470.75	FALSE	22
2022-09-14	10:47:58	0.693448	3.0846	1488.11	FALSE	22
2022-09-14	10:47:58	0.686934	3.05562	1473.81	FALSE	22
2022-09-14	10:47:58	0.687901	3.05992	1491.17	FALSE	22
2022-09-14	10:47:59	0.693448	3.0846	1476.89	FALSE	22
2022-09-14	10:47:59	0.685407	3.04883	1494.22	FALSE	22
2022-09-14	10:47:59	0.689224	3.06581	1479.96	FALSE	22
2022-09-14	10:47:59	0.678486	3.01804	1497.23	FALSE	22
2022-09-14	10:48:00	0.657672	2.92546	1482.88	FALSE	22
2022-09-14	10:48:00	0.703728	3.13032	1500.36	FALSE	22
2022-09-14	10:48:00	0.657112	2.92297	1485.81	FALSE	22
2022-09-14	10:48:00	0.551718	2.45415	1502.82	FALSE	22
2022-09-14	10:48:01	0.691412	3.07554	1488.88	FALSE	22
2022-09-14	10:48:01	0.723015	3.21612	1506.04	FALSE	22
2022-09-14	10:48:01	0.705814	3.1396	1492.02	FALSE	22
2022-09-14	10:48:02	0.712277	3.16835	1509.2	FALSE	22
2022-09-14	10:48:02	0.696247	3.09705	1495.12	FALSE	22
2022-09-14	10:48:02	0.692888	3.0821	1512.29	FALSE	22
2022-09-14	10:48:02	0.697315	3.1018	1498.22	FALSE	22
2022-09-14	10:48:03	0.684288	3.04385	1515.33	FALSE	22
2022-09-14	10:48:03	0.63299	2.81567	1501.04	FALSE	22
2022-09-14	10:48:03	0.599046	2.66468	1517.99	FALSE	22
2022-09-14	10:48:03	0.615484	2.7378	1503.77	FALSE	22
2022-09-14	10:48:04	0.5993	2.66581	1520.66	FALSE	22
2022-09-14	10:48:04	0.57014	2.5361	1506.31	FALSE	22
2022-09-14	10:48:04	0.562455	2.50191	1523.16	FALSE	22
2022-09-14	10:48:04	0.532226	2.36745	1508.68	FALSE	22
2022-09-14	10:48:05	0.556603	2.47588	1525.64	FALSE	22
2022-09-14	10:48:05	0.610852	2.71719	1511.39	FALSE	22
2022-09-14	10:48:05	0.644491	2.86682	1528.5	FALSE	22
2022-09-14	10:48:06	0.615789	2.73915	1514.13	FALSE	22
2022-09-14	10:48:06	0.637825	2.83717	1531.34	FALSE	22
2022-09-14	10:48:06	0.586069	2.60695	1516.74	FALSE	22
2022-09-14	10:48:06	0.510191	2.26943	1533.61	FALSE	22
2022-09-14	10:48:07	0.519504	2.31086	1519.05	FALSE	22
2022-09-14	10:48:07	0.535687	2.38284	1535.99	FALSE	22
2022-09-14	10:48:07	0.565509	2.5155	1521.57	FALSE	22
2022-09-14	10:48:07	0.609122	2.7095	1538.7	FALSE	22
2022-09-14	10:48:08	0.609122	2.7095	1524.28	FALSE	22
2022-09-14	10:48:08	0.604949	2.69093	1541.39	FALSE	22
2022-09-14	10:48:08	0.532023	2.36654	1526.64	FALSE	22
2022-09-14	10:48:08	0.477061	2.12206	1543.52	FALSE	22
2022-09-14	10:48:09	0.76327	3.39518	1530.04	FALSE	22
2022-09-14	10:48:09	0.771768	3.43298	1546.95	FALSE	22
2022-09-14	10:48:09	1.59462	7.09319	1537.13	FALSE	22
2022-09-14	10:48:10	2.96281	13.1792	1560.13	FALSE	22
2022-09-14	10:48:10	3.21742	14.3117	1551.44	1	23
2022-09-14	10:48:10	2.83121	12.5938	1572.72	FALSE	23
2022-09-14	10:48:10	2.91894	12.984	1564.43	FALSE	23
2022-09-14	10:48:11	1.46408	6.51252	1579.23	FALSE	23
2022-09-14	10:48:11	0.734008	3.26501	1567.69	FALSE	23
2022-09-14	10:48:11	0.702048	3.12285	1582.36	FALSE	23
2022-09-14	10:48:11	-0.865228	-3.84871	1567.69	FALSE	23
2022-09-14	10:48:12	2.33645	10.393	1592.75	FALSE	23
2022-09-14	10:48:12	3.44709	15.3333	1583.03	1	24
2022-09-14	10:48:12	1.41844	6.3095	1599.06	FALSE	24
2022-09-14	10:48:12	1.73615	7.72274	1590.75	FALSE	24
2022-09-14	10:48:13	0.584695	2.60084	1601.66	FALSE	24
2022-09-14	10:48:13	0.553652	2.46275	1593.21	FALSE	24
2022-09-14	10:48:13	0.662557	2.94719	1604.61	FALSE	24
2022-09-14	10:48:14	1.6935	7.53303	1600.74	FALSE	24
2022-09-14	10:48:14	2.66551	11.8567	1616.46	FALSE	24
2022-09-14	10:48:14	4.16368	18.5209	1619.26	1	25
2022-09-14	10:48:14	3.49248	15.5352	1632	1	26
2022-09-14	10:48:15	3.51334	15.628	1634.89	1	27
2022-09-14	10:48:15	4.3424	19.3159	1651.32	1	28
2022-09-14	10:48:15	4.34734	19.3378	1654.23	1	29
2022-09-14	10:48:15	4.04983	18.0145	1669.33	1	30
2022-09-14	10:48:16	2.46749	10.9759	1665.21	FALSE	30
2022-09-14	10:48:16	0.920267	4.09353	1673.42	FALSE	30
2022-09-14	10:48:16	1.01223	4.5026	1669.71	FALSE	30
2022-09-14	10:48:16	2.27681	10.1277	1683.55	FALSE	30
2022-09-14	10:48:17	1.64653	7.32409	1677.03	FALSE	30
2022-09-14	10:48:17	1.56989	6.98318	1690.53	FALSE	30
2022-09-14	10:48:17	0.828206	3.68403	1680.72	FALSE	30
2022-09-14	10:48:18	0.634567	2.82268	1693.36	FALSE	30
2022-09-14	10:48:18	1.17309	5.21814	1685.94	FALSE	30
2022-09-14	10:48:18	0.561183	2.49625	1695.85	FALSE	30
2022-09-14	10:48:18	0.246578	1.09683	1687.03	FALSE	30
2022-09-14	10:48:19	-0.705534	-3.13836	1695.85	FALSE	30
2022-09-14	10:48:19	0.218995	0.974134	1688.01	FALSE	30
2022-09-14	10:48:19	0.153143	0.681211	1696.54	FALSE	30
2022-09-14	10:48:19	0.181285	0.806392	1688.81	FALSE	30
2022-09-14	10:48:20	0.653448	2.90667	1699.44	FALSE	30
2022-09-14	10:48:20	0.305611	1.35942	1690.17	FALSE	30
2022-09-14	10:48:20	0.283728	1.26208	1700.7	FALSE	30
2022-09-14	10:48:20	0.10383	0.461857	1690.63	FALSE	30
2022-09-14	10:48:21	0.0143132	0.063668	1700.77	FALSE	30
2022-09-14	10:48:21	-0.848282	-3.77333	1690.63	FALSE	30
2022-09-14	10:48:21	-1.22329	-5.44144	1700.77	FALSE	30
2022-09-14	10:48:22	-0.0429387	-0.191	1690.63	FALSE	30
2022-09-14	10:48:22	-1.1209	-4.98599	1700.77	FALSE	30
2022-09-14	10:48:22	-0.874694	-3.89081	1690.63	FALSE	30
2022-09-14	10:48:22	-0.950165	-4.22652	1700.77	FALSE	30
2022-09-14	10:48:23	-1.01342	-4.50789	1690.63	FALSE	30
2022-09-14	10:48:23	-1.03322	-4.59597	1700.77	FALSE	30
2022-09-14	10:48:23	-1.05123	-4.67608	1690.63	FALSE	30
2022-09-14	10:48:23	-0.811844	-3.61124	1700.77	FALSE	30
2022-09-14	10:48:24	0.651768	2.89919	1693.53	FALSE	30
2022-09-14	10:48:24	-0.107417	-0.477812	1700.77	FALSE	30
2022-09-14	10:48:24	-0.406704	-1.8091	1693.53	FALSE	30
2022-09-14	10:48:24	-0.526145	-2.3404	1700.77	FALSE	30
2022-09-14	10:48:25	-0.596628	-2.65392	1693.53	FALSE	30
2022-09-14	10:48:25	-0.628994	-2.79789	1700.77	FALSE	30
2022-09-14	10:48:25	-0.623294	-2.77254	1693.53	FALSE	30
2022-09-14	10:48:26	-0.631284	-2.80808	1700.77	FALSE	30
2022-09-14	10:48:26	-0.714694	-3.1791	1693.53	FALSE	30
2022-09-14	10:48:26	-0.734694	-3.26807	1700.77	FALSE	30
2022-09-14	10:48:26	-0.61332	-2.72817	1693.53	FALSE	30
2022-09-14	10:48:27	-0.687518	-3.05822	1700.77	FALSE	30
2022-09-14	10:48:27	-0.551793	-2.45449	1693.53	FALSE	30
2022-09-14	10:48:27	-0.652048	-2.90044	1700.77	FALSE	30
2022-09-14	10:48:27	-0.685177	-3.0478	1693.53	FALSE	30
2022-09-14	10:48:28	-0.719427	-3.20016	1700.77	FALSE	30
2022-09-14	10:48:28	-0.67617	-3.00774	1693.53	FALSE	30
2022-09-14	10:48:28	-0.679376	-3.022	1700.77	FALSE	30
2022-09-14	10:48:28	-0.686348	-3.05301	1693.53	FALSE	30
2022-09-14	10:48:29	-0.754083	-3.35431	1700.77	FALSE	30
2022-09-14	10:48:29	-0.765534	-3.40525	1693.53	FALSE	30
2022-09-14	10:48:29	-0.754694	-3.35703	1700.77	FALSE	30
2022-09-14	10:48:29	-0.760394	-3.38238	1693.53	FALSE	30
2022-09-14	10:48:30	-0.747162	-3.32353	1700.77	FALSE	30
2022-09-14	10:48:30	-0.756068	-3.36314	1693.53	FALSE	30
2022-09-14	10:48:30	-0.805228	-3.58182	1700.77	FALSE	30
2022-09-14	10:48:31	-0.806246	-3.58634	1693.53	FALSE	30
2022-09-14	10:48:31	-0.905534	-4.028	1700.77	FALSE	30
2022-09-14	10:48:31	-0.956373	-4.25414	1693.53	FALSE	30
2022-09-14	10:48:31	-1.08131	-4.80988	1700.77	FALSE	30
2022-09-14	10:48:32	-1.10818	-4.92941	1693.53	FALSE	30
2022-09-14	10:48:32	-1.09932	-4.89	1700.77	FALSE	30
2022-09-14	10:48:32	-1.19398	-5.31106	1693.53	FALSE	30
2022-09-14	10:48:32	-1.31922	-5.86815	1700.77	FALSE	30
2022-09-14	10:48:33	-1.29281	-5.75068	1693.53	FALSE	30
2022-09-14	10:48:33	-1.21067	-5.3853	1700.77	FALSE	30
2022-09-14	10:48:33	-1.14233	-5.08131	1693.53	FALSE	30
2022-09-14	10:48:33	-1.09205	-4.85766	1700.77	FALSE	30
2022-09-14	10:48:34	-0.979987	-4.35918	1693.53	FALSE	30
2022-09-14	10:48:34	-0.951539	-4.23264	1700.77	FALSE	30
2022-09-14	10:48:34	-0.845177	-3.75952	1693.53	FALSE	30
2022-09-14	10:48:35	-0.852302	-3.79121	1700.77	FALSE	30
2022-09-14	10:48:35	-0.809961	-3.60287	1693.53	FALSE	30
2022-09-14	10:48:35	-1.11179	-4.94546	1700.77	FALSE	30
2022-09-14	10:48:35	-1.07205	-4.76869	1693.53	FALSE	30
2022-09-14	10:48:36	-0.60131	-2.67475	1700.77	FALSE	30
2022-09-14	10:48:36	-0.215509	-0.958627	1693.53	FALSE	30
2022-09-14	10:48:36	-0.108587	-0.483017	1700.77	FALSE	30
2022-09-14	10:48:36	-0.109046	-0.485058	1693.53	FALSE	30
2022-09-14	10:48:37	-0.0969335	-0.43118	1700.77	FALSE	30
2022-09-14	10:48:37	-0.435763	-1.93836	1693.53	FALSE	30
2022-09-14	10:48:37	-1.00681	-4.47849	1700.77	FALSE	30
2022-09-14	10:48:37	-1.07932	-4.80103	1693.53	FALSE	30
2022-09-14	10:48:38	-1.01424	-4.51154	1700.77	FALSE	30
2022-09-14	10:48:38	-0.994949	-4.42573	1693.53	FALSE	30
2022-09-14	10:48:38	-1.00238	-4.45879	1700.77	FALSE	30
2022-09-14	10:48:39	-1.02304	-4.55069	1693.53	FALSE	30
2022-09-14	10:48:39	-0.988333	-4.3963	1700.77	FALSE	30
2022-09-14	10:48:39	-0.995966	-4.43026	1693.53	FALSE	30
2022-09-14	10:48:39	-0.046043	-0.204808	1700.77	FALSE	30
2022-09-14	10:48:40	-0.786195	-3.49715	1693.53	FALSE	30
2022-09-14	10:48:40	0.301285	1.34018	1702.11	FALSE	30
2022-09-14	10:48:40	1.06403	4.73302	1698.27	FALSE	30
2022-09-14	10:48:40	2.6282	11.6908	1713.8	FALSE	30
2022-09-14	10:48:41	1.31828	5.86397	1704.13	FALSE	30
2022-09-14	10:48:41	0.581641	2.58726	1716.39	FALSE	30
2022-09-14	10:48:41	0.710089	3.15862	1707.29	FALSE	30
2022-09-14	10:48:41	-0.641768	-2.85471	1716.39	FALSE	30
2022-09-14	10:48:42	-1.18299	-5.26218	1707.29	FALSE	30
2022-09-14	10:48:42	-1.1634	-5.17504	1716.39	FALSE	30
2022-09-14	10:48:42	-1.26299	-5.61803	1707.29	FALSE	30
2022-09-14	10:48:43	-1.16543	-5.18407	1716.39	FALSE	30
2022-09-14	10:48:43	-1.27383	-5.66625	1707.29	FALSE	30
2022-09-14	10:48:43	-1.14513	-5.09377	1716.39	FALSE	30
2022-09-14	10:48:43	-1.25424	-5.57911	1707.29	FALSE	30
2022-09-14	10:48:44	-1.16569	-5.18522	1716.39	FALSE	30
2022-09-14	10:48:44	-1.2324	-5.48196	1707.29	FALSE	30
2022-09-14	10:48:44	-1.18482	-5.27032	1716.39	FALSE	30
2022-09-14	10:48:44	-1.17953	-5.24679	1707.29	FALSE	30
2022-09-14	10:48:45	0.466781	2.07634	1718.46	FALSE	30
2022-09-14	10:48:45	0.771005	3.42958	1710.72	FALSE	30
2022-09-14	10:48:45	1.25752	5.5937	1724.06	FALSE	30
2022-09-14	10:48:45	1.81604	8.07811	1718.8	FALSE	30
2022-09-14	10:48:46	0.945814	4.20717	1728.26	FALSE	30
2022-09-14	10:48:46	3.19731	14.2223	1733.02	1	31
2022-09-14	10:48:46	4.28683	19.0687	1747.33	1	32
2022-09-14	10:48:47	3.08739	13.7333	1746.75	1	33
2022-09-14	10:48:47	6.34876	28.2406	1775.57	1	34
2022-09-14	10:48:47	3.98749	17.7372	1764.49	1	35
2022-09-14	10:48:47	1.14108	5.07575	1780.65	FALSE	35
2022-09-14	10:48:48	0.458588	2.03989	1766.53	FALSE	35
2022-09-14	10:48:48	0.316552	1.40809	1782.06	FALSE	35
2022-09-14	10:48:48	0.730903	3.2512	1769.78	FALSE	35
2022-09-14	10:48:48	0.736196	3.27475	1785.33	FALSE	35
2022-09-14	10:48:49	0.551056	2.45121	1772.23	FALSE	35
2022-09-14	10:48:49	0.732226	3.25709	1788.59	FALSE	35
2022-09-14	10:48:49	0.741234	3.29716	1775.53	FALSE	35
2022-09-14	10:48:49	0.745153	3.31459	1791.9	FALSE	35
2022-09-14	10:48:50	0.735433	3.27135	1778.8	FALSE	35
2022-09-14	10:48:50	0.431107	1.91765	1793.82	FALSE	35
2022-09-14	10:48:50	0.448257	1.99394	1780.79	FALSE	35
2022-09-14	10:48:50	0.262354	1.167	1794.99	FALSE	35
2022-09-14	10:48:51	0.414924	1.84566	1782.64	FALSE	35
2022-09-14	10:48:51	0.167239	0.743913	1795.73	FALSE	35
2022-09-14	10:48:51	0.346832	1.54278	1784.18	FALSE	35
2022-09-14	10:48:52	0.0627101	0.278947	1796.01	FALSE	35
2022-09-14	10:48:52	0.170496	0.7584	1784.94	FALSE	35
2022-09-14	10:48:52	0.0588934	0.26197	1796.27	FALSE	35
2022-09-14	10:48:52	0.202761	0.901921	1785.84	FALSE	35
2022-09-14	10:48:53	0.124593	0.554215	1796.83	FALSE	35
2022-09-14	10:48:53	0.406985	1.81035	1787.65	FALSE	35
2022-09-14	10:48:53	0.370242	1.64691	1798.47	FALSE	35
2022-09-14	10:48:53	0.51411	2.28686	1789.94	FALSE	35
2022-09-14	10:48:54	0.415585	1.84861	1800.32	FALSE	35
2022-09-14	10:48:54	0.329886	1.4674	1791.41	FALSE	35
2022-09-14	10:48:54	0.375229	1.66909	1801.99	FALSE	35
2022-09-14	10:48:54	0.243982	1.08528	1792.49	FALSE	35
2022-09-14	10:48:55	0.37355	1.66163	1803.65	FALSE	35
2022-09-14	10:48:55	0.464797	2.06751	1794.56	FALSE	35
2022-09-14	10:48:55	1.19462	5.31391	1808.97	FALSE	35
2022-09-14	10:48:56	1.29599	5.76482	1800.32	FALSE	35
2022-09-14	10:48:56	1.47772	6.57319	1815.54	FALSE	35
2022-09-14	10:48:56	1.13156	5.03341	1805.36	FALSE	35
2022-09-14	10:48:56	1.04449	4.6461	1820.19	FALSE	35
2022-09-14	10:48:57	0.517214	2.30067	1807.66	FALSE	35
2022-09-14	10:48:57	0.803168	3.57265	1823.76	FALSE	35
2022-09-14	10:48:57	0.404644	1.79994	1809.46	FALSE	35
2022-09-14	10:48:57	0.900114	4.00389	1827.76	FALSE	35
2022-09-14	10:48:58	0.861183	3.83071	1813.29	FALSE	35
2022-09-14	10:48:58	0.670191	2.98114	1830.74	FALSE	35
2022-09-14	10:48:58	0.641132	2.85188	1816.14	FALSE	35
2022-09-14	10:48:58	3.20597	14.2608	1845	1	36
2022-09-14	10:48:59	0.706629	3.14323	1819.28	FALSE	36
2022-09-14	10:48:59	0.458995	2.0417	1847.05	FALSE	36
2022-09-14	10:48:59	0.431412	1.91901	1821.2	FALSE	36
2022-09-14	10:49:00	0.384389	1.70984	1848.76	FALSE	36
2022-09-14	10:49:00	0.462303	2.05642	1823.26	FALSE	36
2022-09-14	10:49:00	0.230446	1.02507	1849.78	FALSE	36
2022-09-14	10:49:00	0.335433	1.49207	1824.75	FALSE	36
2022-09-14	10:49:01	0.257214	1.14414	1850.92	FALSE	36
2022-09-14	10:49:01	0.367494	1.63469	1826.39	FALSE	36
2022-09-14	10:49:01	0.286069	1.27249	1852.2	FALSE	36
2022-09-14	10:49:01	0.37299	1.65913	1828.05	FALSE	36
2022-09-14	10:49:02	0.483168	2.14923	1854.35	FALSE	36
2022-09-14	10:49:02	0.341794	1.52037	1829.57	FALSE	36
2022-09-14	10:49:02	0.411718	1.8314	1856.18	FALSE	36
2022-09-14	10:49:02	0.294059	1.30803	1830.87	FALSE	36
2022-09-14	10:49:03	0.496145	2.20695	1858.38	FALSE	36
2022-09-14	10:49:03	0.221539	0.98545	1831.86	FALSE	36
2022-09-14	10:49:03	0.517264	2.30089	1860.69	FALSE	36
2022-09-14	10:49:04	0.285458	1.26977	1833.13	FALSE	36
2022-09-14	10:49:04	0.517315	2.30112	1862.99	FALSE	36
2022-09-14	10:49:04	0.236298	1.0511	1834.18	FALSE	36
2022-09-14	10:49:04	0.46841	2.08358	1865.07	FALSE	36
2022-09-14	10:49:05	0.285051	1.26796	1835.45	FALSE	36
2022-09-14	10:49:05	0.478842	2.12998	1867.2	FALSE	36
2022-09-14	10:49:05	0.362913	1.61431	1837.06	FALSE	36
2022-09-14	10:49:05	0.448766	1.9962	1869.2	FALSE	36
2022-09-14	10:49:06	0.448155	1.99348	1839.06	FALSE	36
2022-09-14	10:49:06	0.398588	1.773	1870.97	FALSE	36
2022-09-14	10:49:06	0.516501	2.2975	1841.35	FALSE	36
2022-09-14	10:49:06	0.452583	2.01318	1872.98	FALSE	36
2022-09-14	10:49:07	0.464644	2.06683	1843.42	FALSE	36
2022-09-14	10:49:07	0.470395	2.09241	1875.08	FALSE	36
2022-09-14	10:49:07	0.477265	2.12297	1845.54	FALSE	36

## Sheet: Ursula_martin_2022914104350 (2)
Date	Time	Lbs	Total force x time			**GoPro Fitting: 1032
2022-09-14	10:43:51	2.6021	2.6021	FALSE	0
2022-09-14	10:43:51	2.57701	5.17911	FALSE	0
2022-09-14	10:43:51	2.74805	7.92716	FALSE	0
2022-09-14	10:43:51	5.9278	13.855	1	1
2022-09-14	10:43:51	6.07003	19.925	1	2
2022-09-14	10:43:52	6.05136	25.9764	1	3
2022-09-14	10:43:52	4.09111	30.0675	1	4
2022-09-14	10:43:52	1.64449	31.712	FALSE	4
2022-09-14	10:43:52	1.51844	33.2304	FALSE	4
2022-09-14	10:43:53	1.31711	34.5475	FALSE	4
2022-09-14	10:43:53	1.41136	35.9589	FALSE	4
2022-09-14	10:43:53	1.81274	37.7716	FALSE	4
2022-09-14	10:43:53	1.5165	39.2881	FALSE	4
2022-09-14	10:43:54	0.9736	40.2617	FALSE	4
2022-09-14	10:43:54	0.458028	40.7197	FALSE	4
2022-09-14	10:43:54	0.372634	41.0924	FALSE	4
2022-09-14	10:43:55	0.387748	41.4801	FALSE	4
2022-09-14	10:43:55	0.405814	41.8859	FALSE	4
2022-09-14	10:43:55	0.329173	42.2151	FALSE	4
2022-09-14	10:43:55	0.380725	42.5958	FALSE	4
2022-09-14	10:43:56	0.35182	42.9476	FALSE	4
2022-09-14	10:43:56	0.334568	43.2822	FALSE	4
2022-09-14	10:43:56	0.434059	43.7163	FALSE	4
2022-09-14	10:43:56	0.288868	44.0051	FALSE	4
2022-09-14	10:43:57	0.312379	44.3175	FALSE	4
2022-09-14	10:43:57	0.424848	44.7424	FALSE	4
2022-09-14	10:43:57	0.395687	45.1381	FALSE	4
2022-09-14	10:43:57	0.369987	45.508	FALSE	4
2022-09-14	10:43:58	0.386832	45.8949	FALSE	4
2022-09-14	10:43:58	0.381692	46.2766	FALSE	4
2022-09-14	10:43:58	0.370445	46.647	FALSE	4
2022-09-14	10:43:59	0.350903	46.9979	FALSE	4
2022-09-14	10:43:59	0.429987	47.4279	FALSE	4
2022-09-14	10:43:59	0.415738	47.8436	FALSE	4
2022-09-14	10:43:59	0.399351	48.243	FALSE	4
2022-09-14	10:44:00	0.390547	48.6335	FALSE	4
2022-09-14	10:44:00	0.405662	49.0392	FALSE	4
2022-09-14	10:44:00	0.407494	49.4467	FALSE	4
2022-09-14	10:44:00	0.388664	49.8354	FALSE	4
2022-09-14	10:44:01	0.394313	50.2297	FALSE	4
2022-09-14	10:44:01	0.384389	50.6141	FALSE	4
2022-09-14	10:44:01	0.398639	51.0127	FALSE	4
2022-09-14	10:44:01	0.394008	51.4067	FALSE	4
2022-09-14	10:44:02	0.387646	51.7943	FALSE	4
2022-09-14	10:44:02	0.36383	52.1582	FALSE	4
2022-09-14	10:44:02	0.407087	52.5653	FALSE	4
2022-09-14	10:44:03	0.37411	52.9394	FALSE	4
2022-09-14	10:44:03	0.322863	53.2622	FALSE	4
2022-09-14	10:44:03	0.389071	53.6513	FALSE	4
2022-09-14	10:44:03	0.352328	54.0036	FALSE	4
2022-09-14	10:44:04	0.373092	54.3767	FALSE	4
2022-09-14	10:44:04	0.388104	54.7648	FALSE	4
2022-09-14	10:44:04	0.396451	55.1613	FALSE	4
2022-09-14	10:44:04	0.391667	55.553	FALSE	4
2022-09-14	10:44:05	0.413244	55.9662	FALSE	4
2022-09-14	10:44:05	0.399657	56.3659	FALSE	4
2022-09-14	10:44:05	0.379758	56.7456	FALSE	4
2022-09-14	10:44:05	0.457774	57.2034	FALSE	4
2022-09-14	10:44:06	0.422405	57.6258	FALSE	4
2022-09-14	10:44:06	0.370903	57.9967	FALSE	4
2022-09-14	10:44:06	0.44902	58.4457	FALSE	4
2022-09-14	10:44:07	1.30709	59.7528	FALSE	4
2022-09-14	10:44:07	1.43528	61.1881	FALSE	4
2022-09-14	10:44:07	3.94719	65.1353	1	5
2022-09-14	10:44:07	4.74372	69.879	1	6
2022-09-14	10:44:08	1.86866	71.7477	FALSE	6
2022-09-14	10:44:08	2.14052	73.8882	FALSE	6
2022-09-14	10:44:08	1.47401	75.3622	FALSE	6
2022-09-14	10:44:08	1.10653	76.4687	FALSE	6
2022-09-14	10:44:09	0.470344	76.9391	FALSE	6
2022-09-14	10:44:09	0.236501	77.1756	FALSE	6
2022-09-14	10:44:09	0.121387	77.2969	FALSE	6
2022-09-14	10:44:09	0.195026	77.492	FALSE	6
2022-09-14	10:44:10	0.109071	77.601	FALSE	6
2022-09-14	10:44:10	0.0843895	77.6854	FALSE	6
2022-09-14	10:44:10	0.512939	78.1984	FALSE	6
2022-09-14	10:44:11	0.620573	78.8189	FALSE	6
2022-09-14	10:44:11	0.554364	79.3733	FALSE	6
2022-09-14	10:44:11	0.663371	80.0367	FALSE	6
2022-09-14	10:44:11	0.5364	80.5731	FALSE	6
2022-09-14	10:44:12	0.623982	81.1971	FALSE	6
2022-09-14	10:44:12	0.315992	81.5131	FALSE	6
2022-09-14	10:44:12	0.247239	81.7603	FALSE	6
2022-09-14	10:44:12	0.293244	82.0535	FALSE	6
2022-09-14	10:44:13	0.100064	82.1536	FALSE	6
2022-09-14	10:44:13	0.336654	82.4903	FALSE	6
2022-09-14	10:44:13	0.175585	82.6658	FALSE	6
2022-09-14	10:44:14	0.346018	83.0119	FALSE	6
2022-09-14	10:44:14	0.178893	83.1907	FALSE	6
2022-09-14	10:44:14	0.375433	83.5662	FALSE	6
2022-09-14	10:44:14	1.00016	84.5663	FALSE	6
2022-09-14	10:44:15	0.556959	85.1233	FALSE	6
2022-09-14	10:44:15	0.747443	85.8707	FALSE	6
2022-09-14	10:44:15	0.649631	86.5204	FALSE	6
2022-09-14	10:44:15	-0.647518	86.5204	FALSE	6
2022-09-14	10:44:16	-0.452913	86.5204	FALSE	6
2022-09-14	10:44:16	0.263575	86.7839	FALSE	6
2022-09-14	10:44:16	0.926527	87.7105	FALSE	6
2022-09-14	10:44:16	0.57243	88.2829	FALSE	6
2022-09-14	10:44:17	0.461183	88.7441	FALSE	6
2022-09-14	10:44:17	0.249835	88.9939	FALSE	6
2022-09-14	10:44:17	0.561285	89.5552	FALSE	6
2022-09-14	10:44:17	0.366374	89.9216	FALSE	6
2022-09-14	10:44:18	0.457774	90.3794	FALSE	6
2022-09-14	10:44:18	0.423168	90.8025	FALSE	6
2022-09-14	10:44:18	0.462863	91.2654	FALSE	6
2022-09-14	10:44:19	0.353804	91.6192	FALSE	6
2022-09-14	10:44:19	0.340573	91.9598	FALSE	6
2022-09-14	10:44:19	0.453092	92.4129	FALSE	6
2022-09-14	10:44:19	0.440369	92.8532	FALSE	6
2022-09-14	10:44:20	0.467647	93.3209	FALSE	6
2022-09-14	10:44:20	0.493193	93.8141	FALSE	6
2022-09-14	10:44:20	0.459809	94.2739	FALSE	6
2022-09-14	10:44:20	0.650954	94.9248	FALSE	6
2022-09-14	10:44:21	3.49136	98.4162	1	7
2022-09-14	10:44:21	0.335178	98.7514	FALSE	7
2022-09-14	10:44:21	0.19472	98.9461	FALSE	7
2022-09-14	10:44:21	0.218995	99.1651	FALSE	7
2022-09-14	10:44:22	0.31584	99.4809	FALSE	7
2022-09-14	10:44:22	0.358639	99.8396	FALSE	7
2022-09-14	10:44:22	0.383982	100.224	FALSE	7
2022-09-14	10:44:23	0.347596	100.571	FALSE	7
2022-09-14	10:44:23	0.523575	101.095	FALSE	7
2022-09-14	10:44:23	1.14246	102.237	FALSE	7
2022-09-14	10:44:23	1.76836	104.006	FALSE	7
2022-09-14	10:44:24	1.30831	105.314	FALSE	7
2022-09-14	10:44:24	0.614262	105.928	FALSE	7
2022-09-14	10:44:24	0.611768	106.54	FALSE	7
2022-09-14	10:44:24	0.735433	107.275	FALSE	7
2022-09-14	10:44:25	0.376094	107.651	FALSE	7
2022-09-14	10:44:25	0.374771	108.026	FALSE	7
2022-09-14	10:44:25	0.439708	108.466	FALSE	7
2022-09-14	10:44:25	0.185356	108.651	FALSE	7
2022-09-14	10:44:26	0.205153	108.856	FALSE	7
2022-09-14	10:44:26	0.23411	109.09	FALSE	7
2022-09-14	10:44:26	0.149937	109.24	FALSE	7
2022-09-14	10:44:27	0.292481	109.533	FALSE	7
2022-09-14	10:44:27	0.190089	109.723	FALSE	7
2022-09-14	10:44:27	0.174059	109.897	FALSE	7
2022-09-14	10:44:27	0.185611	110.083	FALSE	7
2022-09-14	10:44:28	0.170293	110.253	FALSE	7
2022-09-14	10:44:28	0.300624	110.554	FALSE	7
2022-09-14	10:44:28	0.111362	110.665	FALSE	7
2022-09-14	10:44:28	0.253855	110.919	FALSE	7
2022-09-14	10:44:29	0.0944149	111.013	FALSE	7
2022-09-14	10:44:29	0.294262	111.307	FALSE	7
2022-09-14	10:44:29	0.0455091	111.353	FALSE	7
2022-09-14	10:44:29	0.257774	111.611	FALSE	7
2022-09-14	10:44:30	0.148359	111.759	FALSE	7
2022-09-14	10:44:30	0.260115	112.019	FALSE	7
2022-09-14	10:44:30	0.175992	112.195	FALSE	7
2022-09-14	10:44:30	0.29757	112.493	FALSE	7
2022-09-14	10:44:31	0.159097	112.652	FALSE	7
2022-09-14	10:44:31	0.099962	112.752	FALSE	7
2022-09-14	10:44:31	0.13757	112.889	FALSE	7
2022-09-14	10:44:32	0.213448	113.103	FALSE	7
2022-09-14	10:44:32	0.406832	113.51	FALSE	7
2022-09-14	10:44:32	0.18383	113.694	FALSE	7
2022-09-14	10:44:32	0.353448	114.047	FALSE	7
2022-09-14	10:44:33	0.14673	114.194	FALSE	7
2022-09-14	10:44:33	0.35645	114.55	FALSE	7
2022-09-14	10:44:33	0.0461707	114.596	FALSE	7
2022-09-14	10:44:33	0.225306	114.822	FALSE	7
2022-09-14	10:44:34	0.181336	115.003	FALSE	7
2022-09-14	10:44:34	0.191463	115.194	FALSE	7
2022-09-14	10:44:34	0.0154837	115.21	FALSE	7
2022-09-14	10:44:34	0.109428	115.319	FALSE	7
2022-09-14	10:44:35	0.0619468	115.381	FALSE	7
2022-09-14	10:44:35	-0.0534221	115.381	FALSE	7
2022-09-14	10:44:35	-0.135152	115.381	FALSE	7
2022-09-14	10:44:36	-0.0356104	115.381	FALSE	7
2022-09-14	10:44:36	-0.211895	115.381	FALSE	7
2022-09-14	10:44:36	-0.314745	115.381	FALSE	7
2022-09-14	10:44:36	-0.479936	115.381	FALSE	7
2022-09-14	10:44:37	-0.264058	115.381	FALSE	7
2022-09-14	10:44:37	-0.212048	115.381	FALSE	7
2022-09-14	10:44:37	0.011616	115.393	FALSE	7
2022-09-14	10:44:37	-0.0182567	115.393	FALSE	7
2022-09-14	10:44:38	0.340115	115.733	FALSE	7
2022-09-14	10:44:38	1.06999	116.803	FALSE	7
2022-09-14	10:44:38	2.25284	119.056	FALSE	7
2022-09-14	10:44:38	3.85518	122.911	1	8
2022-09-14	10:44:39	3.96393	126.875	1	9
2022-09-14	10:44:39	3.41548	130.29	1	10
2022-09-14	10:44:39	3.85406	134.145	1	11
2022-09-14	10:44:40	2.268	136.413	FALSE	11
2022-09-14	10:44:40	1.89365	138.306	FALSE	11
2022-09-14	10:44:40	1.51238	139.819	FALSE	11
2022-09-14	10:44:40	1.20663	141.025	FALSE	11
2022-09-14	10:44:41	1.33716	142.362	FALSE	11
2022-09-14	10:44:41	1.25843	143.621	FALSE	11
2022-09-14	10:44:41	1.43996	145.061	FALSE	11
2022-09-14	10:44:41	1.21502	146.276	FALSE	11
2022-09-14	10:44:42	1.21655	147.492	FALSE	11
2022-09-14	10:44:42	1.29177	148.784	FALSE	11
2022-09-14	10:44:42	1.26042	150.044	FALSE	11
2022-09-14	10:44:42	1.29691	151.341	FALSE	11
2022-09-14	10:44:43	1.34719	152.689	FALSE	11
2022-09-14	10:44:43	1.31467	154.003	FALSE	11
2022-09-14	10:44:43	2.02989	156.033	FALSE	11
2022-09-14	10:44:44	1.60637	157.64	FALSE	11
2022-09-14	10:44:44	1.7105	159.35	FALSE	11
2022-09-14	10:44:44	0.804593	160.155	FALSE	11
2022-09-14	10:44:44	0.421896	160.577	FALSE	11
2022-09-14	10:44:45	0.291361	160.868	FALSE	11
2022-09-14	10:44:45	0.370089	161.238	FALSE	11
2022-09-14	10:44:45	0.386272	161.624	FALSE	11
2022-09-14	10:44:45	0.150293	161.775	FALSE	11
2022-09-14	10:44:46	-0.116068	161.775	FALSE	11
2022-09-14	10:44:46	-0.175458	161.775	FALSE	11
2022-09-14	10:44:46	-0.202379	161.775	FALSE	11
2022-09-14	10:44:46	0.515687	162.29	FALSE	11
2022-09-14	10:44:47	0.29243	162.583	FALSE	11
2022-09-14	10:44:47	-0.131692	162.583	FALSE	11
2022-09-14	10:44:47	-0.062328	162.583	FALSE	11
2022-09-14	10:44:48	-0.231336	162.583	FALSE	11
2022-09-14	10:44:48	-0.033015	162.583	FALSE	11
2022-09-14	10:44:48	-0.150216	162.583	FALSE	11
2022-09-14	10:44:48	0.0322267	162.615	FALSE	11
2022-09-14	10:44:49	-0.15047	162.615	FALSE	11
2022-09-14	10:44:49	0.064186	162.679	FALSE	11
2022-09-14	10:44:49	-0.0238038	162.679	FALSE	11
2022-09-14	10:44:49	0.099962	162.779	FALSE	11
2022-09-14	10:44:50	-0.134389	162.779	FALSE	11
2022-09-14	10:44:50	0.00215038	162.781	FALSE	11
2022-09-14	10:44:50	-0.0438547	162.781	FALSE	11
2022-09-14	10:44:50	0.0233717	162.805	FALSE	11
2022-09-14	10:44:51	-0.153727	162.805	FALSE	11
2022-09-14	10:44:51	0.0118705	162.816	FALSE	11
2022-09-14	10:44:51	-0.124007	162.816	FALSE	11
2022-09-14	10:44:52	-0.00426182	162.816	FALSE	11
2022-09-14	10:44:52	0.48444	163.301	FALSE	11
2022-09-14	10:44:52	1.72006	165.021	FALSE	11
2022-09-14	10:44:52	1.98531	167.006	FALSE	11
2022-09-14	10:44:53	2.20785	169.214	FALSE	11
2022-09-14	10:44:53	1.68266	170.897	FALSE	11
2022-09-14	10:44:53	1.45472	172.351	FALSE	11
2022-09-14	10:44:53	1.20342	173.555	FALSE	11
2022-09-14	10:44:54	0.907494	174.462	FALSE	11
2022-09-14	10:44:54	1.04357	175.506	FALSE	11
2022-09-14	10:44:54	0.747646	176.254	FALSE	11
2022-09-14	10:44:55	0.43126	176.685	FALSE	11
2022-09-14	10:44:55	0.246934	176.932	FALSE	11
2022-09-14	10:44:55	0.159097	177.091	FALSE	11
2022-09-14	10:44:55	0.162659	177.254	FALSE	11
2022-09-14	10:44:56	0.704593	177.958	FALSE	11
2022-09-14	10:44:56	0.0468832	178.005	FALSE	11
2022-09-14	10:44:56	-0.0163738	178.005	FALSE	11
2022-09-14	10:44:56	-0.00899467	178.005	FALSE	11
2022-09-14	10:44:57	-0.114389	178.005	FALSE	11
2022-09-14	10:44:57	-0.03673	178.005	FALSE	11
2022-09-14	10:44:57	-0.0973407	178.005	FALSE	11
2022-09-14	10:44:57	0.0711071	178.076	FALSE	11
2022-09-14	10:44:58	-0.104923	178.076	FALSE	11
2022-09-14	10:44:58	0.0542623	178.13	FALSE	11
2022-09-14	10:44:58	-0.104364	178.13	FALSE	11
2022-09-14	10:44:58	0.0482572	178.179	FALSE	11
2022-09-14	10:44:59	0.086934	178.266	FALSE	11
2022-09-14	10:44:59	0.292176	178.558	FALSE	11
2022-09-14	10:44:59	0.289835	178.848	FALSE	11
2022-09-14	10:45:00	0.350802	179.198	FALSE	11
2022-09-14	10:45:00	0.716959	179.915	FALSE	11
2022-09-14	10:45:00	0.610852	180.526	FALSE	11
2022-09-14	10:45:00	0.705814	181.232	FALSE	11
2022-09-14	10:45:01	0.895331	182.127	FALSE	11
2022-09-14	10:45:01	0.708257	182.836	FALSE	11
2022-09-14	10:45:01	0.646628	183.482	FALSE	11
2022-09-14	10:45:01	0.912735	184.395	FALSE	11
2022-09-14	10:45:02	0.931005	185.326	FALSE	11
2022-09-14	10:45:02	1.12057	186.447	FALSE	11
2022-09-14	10:45:02	0.817824	187.264	FALSE	11
2022-09-14	10:45:02	0.36897	187.633	FALSE	11
2022-09-14	10:45:03	0.0438297	187.677	FALSE	11
2022-09-14	10:45:03	-0.170979	187.677	FALSE	11
2022-09-14	10:45:03	-0.279427	187.677	FALSE	11
2022-09-14	10:45:04	-0.40589	187.677	FALSE	11
2022-09-14	10:45:04	-0.499732	187.677	FALSE	11
2022-09-14	10:45:04	-0.551844	187.677	FALSE	11
2022-09-14	10:45:04	-0.565228	187.677	FALSE	11
2022-09-14	10:45:05	-0.592811	187.677	FALSE	11
2022-09-14	10:45:05	-0.692251	187.677	FALSE	11
2022-09-14	10:45:05	-0.642073	187.677	FALSE	11
2022-09-14	10:45:05	-0.737289	187.677	FALSE	11
2022-09-14	10:45:06	-0.647162	187.677	FALSE	11
2022-09-14	10:45:06	-0.849147	187.677	FALSE	11
2022-09-14	10:45:06	-0.657646	187.677	FALSE	11
2022-09-14	10:45:06	-0.7379	187.677	FALSE	11
2022-09-14	10:45:07	-0.606806	187.677	FALSE	11
2022-09-14	10:45:07	-0.621005	187.677	FALSE	11
2022-09-14	10:45:07	-0.321157	187.677	FALSE	11
2022-09-14	10:45:08	-0.179834	187.677	FALSE	11
2022-09-14	10:45:08	-0.208231	187.677	FALSE	11
2022-09-14	10:45:08	-0.0103687	187.677	FALSE	11
2022-09-14	10:45:08	-0.0145417	187.677	FALSE	11
2022-09-14	10:45:09	0.184542	187.862	FALSE	11
2022-09-14	10:45:09	-0.181768	187.862	FALSE	11
2022-09-14	10:45:09	-0.00217532	187.862	FALSE	11
2022-09-14	10:45:09	-0.094847	187.862	FALSE	11
2022-09-14	10:45:10	-0.0365773	187.862	FALSE	11
2022-09-14	10:45:10	-0.157544	187.862	FALSE	11
2022-09-14	10:45:10	0.0193514	187.881	FALSE	11
2022-09-14	10:45:10	0.0213361	187.902	FALSE	11
2022-09-14	10:45:11	0.360725	188.263	FALSE	11
2022-09-14	10:45:11	0.216094	188.479	FALSE	11
2022-09-14	10:45:11	0.431718	188.911	FALSE	11
2022-09-14	10:45:11	0.291921	189.203	FALSE	11
2022-09-14	10:45:12	0.383422	189.586	FALSE	11
2022-09-14	10:45:12	0.225407	189.812	FALSE	11
2022-09-14	10:45:12	0.179097	189.991	FALSE	11
2022-09-14	10:45:13	0.542659	190.533	FALSE	11
2022-09-14	10:45:13	0.731819	191.265	FALSE	11
2022-09-14	10:45:13	0.917315	192.183	FALSE	11
2022-09-14	10:45:13	0.76327	192.946	FALSE	11
2022-09-14	10:45:14	1.15925	194.105	FALSE	11
2022-09-14	10:45:14	1.55497	195.66	FALSE	11
2022-09-14	10:45:14	1.92078	197.581	FALSE	11
2022-09-14	10:45:14	1.77426	199.355	FALSE	11
2022-09-14	10:45:15	1.42383	200.779	FALSE	11
2022-09-14	10:45:15	0.814109	201.593	FALSE	11
2022-09-14	10:45:15	0.70271	202.296	FALSE	11
2022-09-14	10:45:15	0.803982	203.1	FALSE	11
2022-09-14	10:45:16	0.712277	203.812	FALSE	11
2022-09-14	10:45:16	0.640827	204.453	FALSE	11
2022-09-14	10:45:16	0.620522	205.073	FALSE	11
2022-09-14	10:45:17	0.622913	205.696	FALSE	11
2022-09-14	10:45:17	0.647952	206.344	FALSE	11
2022-09-14	10:45:17	0.624542	206.969	FALSE	11
2022-09-14	10:45:17	0.626883	207.596	FALSE	11
2022-09-14	10:45:18	0.742354	208.338	FALSE	11
2022-09-14	10:45:18	0.78958	209.128	FALSE	11
2022-09-14	10:45:18	0.874059	210.002	FALSE	11
2022-09-14	10:45:18	1.01279	211.014	FALSE	11
2022-09-14	10:45:19	0.948919	211.963	FALSE	11
2022-09-14	10:45:19	0.736145	212.699	FALSE	11
2022-09-14	10:45:19	0.660166	213.36	FALSE	11
2022-09-14	10:45:19	0.603015	213.963	FALSE	11
2022-09-14	10:45:20	0.587646	214.55	FALSE	11
2022-09-14	10:45:20	0.586985	215.137	FALSE	11
2022-09-14	10:45:20	0.708664	215.846	FALSE	11
2022-09-14	10:45:21	1.06083	216.907	FALSE	11
2022-09-14	10:45:21	1.47253	218.379	FALSE	11
2022-09-14	10:45:21	1.62877	220.008	FALSE	11
2022-09-14	10:45:21	1.46368	221.472	FALSE	11
2022-09-14	10:45:22	1.36505	222.837	FALSE	11
2022-09-14	10:45:22	0.993448	223.83	FALSE	11
2022-09-14	10:45:22	0.774873	224.605	FALSE	11
2022-09-14	10:45:22	0.761488	225.367	FALSE	11
2022-09-14	10:45:23	0.702099	226.069	FALSE	11
2022-09-14	10:45:23	0.765509	226.834	FALSE	11
2022-09-14	10:45:23	0.173295	227.008	FALSE	11
2022-09-14	10:45:23	0.186578	227.194	FALSE	11
2022-09-14	10:45:24	0.200115	227.394	FALSE	11
2022-09-14	10:45:24	0.710598	228.105	FALSE	11
2022-09-14	10:45:24	0.703575	228.808	FALSE	11
2022-09-14	10:45:25	0.658791	229.467	FALSE	11
2022-09-14	10:45:25	0.644237	230.111	FALSE	11
2022-09-14	10:45:25	0.759605	230.871	FALSE	11
2022-09-14	10:45:25	0.775229	231.646	FALSE	11
2022-09-14	10:45:26	0.633448	232.28	FALSE	11
2022-09-14	10:45:26	0.729428	233.009	FALSE	11
2022-09-14	10:45:26	0.714058	233.723	FALSE	11
2022-09-14	10:45:26	0.677773	234.401	FALSE	11
2022-09-14	10:45:27	0.677773	235.079	FALSE	11
2022-09-14	10:45:27	0.689936	235.769	FALSE	11
2022-09-14	10:45:27	0.6593	236.428	FALSE	11
2022-09-14	10:45:27	0.651005	237.079	FALSE	11
2022-09-14	10:45:28	0.637722	237.717	FALSE	11
2022-09-14	10:45:28	0.590954	238.308	FALSE	11
2022-09-14	10:45:28	0.614415	238.922	FALSE	11
2022-09-14	10:45:29	0.616807	239.539	FALSE	11
2022-09-14	10:45:29	0.523626	240.063	FALSE	11
2022-09-14	10:45:29	0.55187	240.614	FALSE	11
2022-09-14	10:45:29	0.393448	241.008	FALSE	11
2022-09-14	10:45:30	0.400064	241.408	FALSE	11
2022-09-14	10:45:30	0.23986	241.648	FALSE	11
2022-09-14	10:45:30	0.0500893	241.698	FALSE	11
2022-09-14	10:45:30	-0.106501	241.698	FALSE	11
2022-09-14	10:45:31	-0.144771	241.698	FALSE	11
2022-09-14	10:45:31	0.621845	242.32	FALSE	11
2022-09-14	10:45:31	0.619555	242.939	FALSE	11
2022-09-14	10:45:31	0.459555	243.399	FALSE	11
2022-09-14	10:45:32	0.597061	243.996	FALSE	11
2022-09-14	10:45:32	0.747646	244.743	FALSE	11
2022-09-14	10:45:32	0.462049	245.206	FALSE	11
2022-09-14	10:45:33	0.797723	246.003	FALSE	11
2022-09-14	10:45:33	1.17548	247.179	FALSE	11
2022-09-14	10:45:33	1.09996	248.279	FALSE	11
2022-09-14	10:45:33	1.61645	249.895	FALSE	11
2022-09-14	10:45:34	1.87472	251.77	FALSE	11
2022-09-14	10:45:34	2.2077	253.978	FALSE	11
2022-09-14	10:45:34	2.85732	256.835	FALSE	11
2022-09-14	10:45:34	1.87686	258.712	FALSE	11
2022-09-14	10:45:35	1.95248	260.664	FALSE	11
2022-09-14	10:45:35	1.68953	262.354	FALSE	11
2022-09-14	10:45:35	1.44938	263.803	FALSE	11
2022-09-14	10:45:35	1.32927	265.132	FALSE	11
2022-09-14	10:45:36	1.21228	266.345	FALSE	11
2022-09-14	10:45:36	1.33681	267.682	FALSE	11
2022-09-14	10:45:36	1.69864	269.38	FALSE	11
2022-09-14	10:45:37	1.65212	271.032	FALSE	11
2022-09-14	10:45:37	2.01411	273.046	FALSE	11
2022-09-14	10:45:37	2.42765	275.474	FALSE	11
2022-09-14	10:45:37	2.61874	278.093	FALSE	11
2022-09-14	10:45:38	3.72189	281.815	1	12
2022-09-14	10:45:38	4.61034	286.425	1	13
2022-09-14	10:45:38	4.51258	290.938	1	14
2022-09-14	10:45:38	3.24474	294.182	1	15
2022-09-14	10:45:39	2.43996	296.622	FALSE	15
2022-09-14	10:45:39	1.74485	298.367	FALSE	15
2022-09-14	10:45:39	1.18877	299.556	FALSE	15
2022-09-14	10:45:39	1.24246	300.798	FALSE	15
2022-09-14	10:45:40	1.78622	302.585	FALSE	15
2022-09-14	10:45:40	2.53604	305.121	FALSE	15
2022-09-14	10:45:40	2.3481	307.469	FALSE	15
2022-09-14	10:45:41	1.47019	308.939	FALSE	15
2022-09-14	10:45:41	0.924236	309.863	FALSE	15
2022-09-14	10:45:41	0.882506	310.746	FALSE	15
2022-09-14	10:45:41	0.79701	311.543	FALSE	15
2022-09-14	10:45:42	0.896603	312.439	FALSE	15
2022-09-14	10:45:42	0.904746	313.344	FALSE	15
2022-09-14	10:45:42	0.922354	314.266	FALSE	15
2022-09-14	10:45:42	0.876298	315.143	FALSE	15
2022-09-14	10:45:43	0.786578	315.929	FALSE	15
2022-09-14	10:45:43	0.888104	316.817	FALSE	15
2022-09-14	10:45:43	1.08668	317.904	FALSE	15
2022-09-14	10:45:43	1.04449	318.949	FALSE	15
2022-09-14	10:45:44	1.03218	319.981	FALSE	15
2022-09-14	10:45:44	1.10475	321.085	FALSE	15
2022-09-14	10:45:44	1.03243	322.118	FALSE	15
2022-09-14	10:45:45	0.875127	322.993	FALSE	15
2022-09-14	10:45:45	0.964338	323.957	FALSE	15
2022-09-14	10:45:45	1.03289	324.99	FALSE	15
2022-09-14	10:45:45	0.86846	325.859	FALSE	15
2022-09-14	10:45:46	0.679046	326.538	FALSE	15
2022-09-14	10:45:46	0.522913	327.061	FALSE	15
2022-09-14	10:45:46	0.476298	327.537	FALSE	15
2022-09-14	10:45:46	0.524542	328.061	FALSE	15
2022-09-14	10:45:47	0.740623	328.802	FALSE	15
2022-09-14	10:45:47	1.01757	329.82	FALSE	15
2022-09-14	10:45:47	1.43187	331.252	FALSE	15
2022-09-14	10:45:47	2.3681	333.62	FALSE	15
2022-09-14	10:45:48	2.08261	335.702	FALSE	15
2022-09-14	10:45:48	2.04408	337.746	FALSE	15
2022-09-14	10:45:48	1.86765	339.614	FALSE	15
2022-09-14	10:45:48	1.47966	341.094	FALSE	15
2022-09-14	10:45:49	1.38144	342.475	FALSE	15
2022-09-14	10:45:49	1.73477	344.21	FALSE	15
2022-09-14	10:45:49	1.391	345.601	FALSE	15
2022-09-14	10:45:50	1.41798	347.019	FALSE	15
2022-09-14	10:45:50	1.49187	348.511	FALSE	15
2022-09-14	10:45:50	1.71523	350.226	FALSE	15
2022-09-14	10:45:50	1.58327	351.809	FALSE	15
2022-09-14	10:45:51	1.58892	353.398	FALSE	15
2022-09-14	10:45:51	1.65136	355.049	FALSE	15
2022-09-14	10:45:51	1.53268	356.582	FALSE	15
2022-09-14	10:45:51	1.6279	358.21	FALSE	15
2022-09-14	10:45:52	1.69391	359.904	FALSE	15
2022-09-14	10:45:52	1.75141	361.655	FALSE	15
2022-09-14	10:45:52	1.72179	363.377	FALSE	15
2022-09-14	10:45:52	1.75899	365.136	FALSE	15
2022-09-14	10:45:53	1.48551	366.622	FALSE	15
2022-09-14	10:45:53	1.34576	367.967	FALSE	15
2022-09-14	10:45:53	1.14439	369.112	FALSE	15
2022-09-14	10:45:54	1.19421	370.306	FALSE	15
2022-09-14	10:45:54	0.834313	371.14	FALSE	15
2022-09-14	10:45:54	1.09004	372.23	FALSE	15
2022-09-14	10:45:54	0.976094	373.206	FALSE	15
2022-09-14	10:45:55	1.31401	374.52	FALSE	15
2022-09-14	10:45:55	1.13905	375.66	FALSE	15
2022-09-14	10:45:55	0.869377	376.529	FALSE	15
2022-09-14	10:45:55	0.789479	377.318	FALSE	15
2022-09-14	10:45:56	0.588613	377.907	FALSE	15
2022-09-14	10:45:56	0.460827	378.368	FALSE	15
2022-09-14	10:45:56	0.38612	378.754	FALSE	15
2022-09-14	10:45:56	0.245611	379	FALSE	15
2022-09-14	10:45:57	0.221081	379.221	FALSE	15
2022-09-14	10:45:57	-0.14528	379.221	FALSE	15
2022-09-14	10:45:57	-0.580089	379.221	FALSE	15
2022-09-14	10:45:58	0.413702	379.634	FALSE	15
2022-09-14	10:45:58	-0.304262	379.634	FALSE	15
2022-09-14	10:45:58	-0.380445	379.634	FALSE	15
2022-09-14	10:45:58	-0.516323	379.634	FALSE	15
2022-09-14	10:45:59	-0.617544	379.634	FALSE	15
2022-09-14	10:45:59	-0.619732	379.634	FALSE	15
2022-09-14	10:45:59	-0.70645	379.634	FALSE	15
2022-09-14	10:45:59	-0.761259	379.634	FALSE	15
2022-09-14	10:46:00	-0.770317	379.634	FALSE	15
2022-09-14	10:46:00	-0.691895	379.634	FALSE	15
2022-09-14	10:46:00	-0.638206	379.634	FALSE	15
2022-09-14	10:46:00	-0.780903	379.634	FALSE	15
2022-09-14	10:46:01	-0.85673	379.634	FALSE	15
2022-09-14	10:46:01	-0.838205	379.634	FALSE	15
2022-09-14	10:46:01	-0.787162	379.634	FALSE	15
2022-09-14	10:46:02	-0.826908	379.634	FALSE	15
2022-09-14	10:46:02	-0.749503	379.634	FALSE	15
2022-09-14	10:46:02	-0.760241	379.634	FALSE	15
2022-09-14	10:46:02	-0.657086	379.634	FALSE	15
2022-09-14	10:46:03	-0.657493	379.634	FALSE	15
2022-09-14	10:46:03	-0.418206	379.634	FALSE	15
2022-09-14	10:46:03	-0.301666	379.634	FALSE	15
2022-09-14	10:46:03	-0.0709793	379.634	FALSE	15
2022-09-14	10:46:04	0.0339061	379.668	FALSE	15
2022-09-14	10:46:04	0.199046	379.867	FALSE	15
2022-09-14	10:46:04	0.223372	380.091	FALSE	15
2022-09-14	10:46:04	0.475026	380.566	FALSE	15
2022-09-14	10:46:05	0.5907	381.156	FALSE	15
2022-09-14	10:46:05	0.638842	381.795	FALSE	15
2022-09-14	10:46:05	1.02495	382.82	FALSE	15
2022-09-14	10:46:06	0.413295	383.233	FALSE	15
2022-09-14	10:46:06	0.430802	383.664	FALSE	15
2022-09-14	10:46:06	0.295789	383.96	FALSE	15
2022-09-14	10:46:06	0.243728	384.204	FALSE	15
2022-09-14	10:46:07	0.299097	384.503	FALSE	15
2022-09-14	10:46:07	0.14729	384.65	FALSE	15
2022-09-14	10:46:07	0.259962	384.91	FALSE	15
2022-09-14	10:46:07	0.101234	385.011	FALSE	15
2022-09-14	10:46:08	0.269377	385.281	FALSE	15
2022-09-14	10:46:08	0.0155346	385.296	FALSE	15
2022-09-14	10:46:08	0.238079	385.534	FALSE	15
2022-09-14	10:46:08	0.0653565	385.6	FALSE	15
2022-09-14	10:46:09	0.123779	385.724	FALSE	15
2022-09-14	10:46:09	0.00433869	385.728	FALSE	15
2022-09-14	10:46:09	0.169631	385.897	FALSE	15
2022-09-14	10:46:10	0.0322267	385.93	FALSE	15
2022-09-14	10:46:10	0.0816923	386.011	FALSE	15
2022-09-14	10:46:10	-0.0978496	386.011	FALSE	15
2022-09-14	10:46:10	0.037214	386.049	FALSE	15
2022-09-14	10:46:11	-0.0968317	386.049	FALSE	15
2022-09-14	10:46:11	0.0319723	386.081	FALSE	15
2022-09-14	10:46:11	-0.0603941	386.081	FALSE	15
2022-09-14	10:46:11	0.140624	386.221	FALSE	15
2022-09-14	10:46:12	0.0546694	386.276	FALSE	15
2022-09-14	10:46:12	0.233906	386.51	FALSE	15
2022-09-14	10:46:12	0.258842	386.769	FALSE	15
2022-09-14	10:46:12	0.638232	387.407	FALSE	15
2022-09-14	10:46:13	0.531667	387.939	FALSE	15
2022-09-14	10:46:13	0.801692	388.74	FALSE	15
2022-09-14	10:46:13	0.59701	389.337	FALSE	15
2022-09-14	10:46:14	0.586119	389.923	FALSE	15
2022-09-14	10:46:14	0.579402	390.503	FALSE	15
2022-09-14	10:46:14	0.90729	391.41	FALSE	15
2022-09-14	10:46:14	0.68327	392.093	FALSE	15
2022-09-14	10:46:15	0.557315	392.651	FALSE	15
2022-09-14	10:46:15	0.470496	393.121	FALSE	15
2022-09-14	10:46:15	0.574822	393.696	FALSE	15
2022-09-14	10:46:15	0.647646	394.344	FALSE	15
2022-09-14	10:46:16	0.593651	394.937	FALSE	15
2022-09-14	10:46:16	0.497061	395.434	FALSE	15
2022-09-14	10:46:16	0.529071	395.963	FALSE	15
2022-09-14	10:46:16	0.530089	396.493	FALSE	15
2022-09-14	10:46:17	0.50327	396.997	FALSE	15
2022-09-14	10:46:17	0.552277	397.549	FALSE	15
2022-09-14	10:46:17	0.531056	398.08	FALSE	15
2022-09-14	10:46:18	0.914211	398.994	FALSE	15
2022-09-14	10:46:18	1.77309	400.767	FALSE	15
2022-09-14	10:46:18	2.79207	403.559	FALSE	15
2022-09-14	10:46:18	2.54006	406.1	FALSE	15
2022-09-14	10:46:19	2.43543	408.535	FALSE	15
2022-09-14	10:46:19	1.69762	410.233	FALSE	15
2022-09-14	10:46:19	1.19996	411.433	FALSE	15
2022-09-14	10:46:19	1.89126	413.324	FALSE	15
2022-09-14	10:46:20	4.71426	418.038	1	16
2022-09-14	10:46:20	7.18179	425.22	1	17
2022-09-14	10:46:20	2.65925	427.879	FALSE	17
2022-09-14	10:46:20	1.41274	429.292	FALSE	17
2022-09-14	10:46:21	1.94709	431.239	FALSE	17
2022-09-14	10:46:21	2.98581	434.225	FALSE	17
2022-09-14	10:46:21	3.13314	437.358	1	18
2022-09-14	10:46:22	2.20765	439.566	FALSE	18
2022-09-14	10:46:22	2.21726	441.783	FALSE	18
2022-09-14	10:46:22	2.1791	443.962	FALSE	18
2022-09-14	10:46:22	2.34877	446.311	FALSE	18
2022-09-14	10:46:23	1.9505	448.261	FALSE	18
2022-09-14	10:46:23	1.57711	449.838	FALSE	18
2022-09-14	10:46:23	1.46419	451.302	FALSE	18
2022-09-14	10:46:23	1.14195	452.444	FALSE	18
2022-09-14	10:46:24	0.727748	453.172	FALSE	18
2022-09-14	10:46:24	1.08454	454.257	FALSE	18
2022-09-14	10:46:24	2.10393	456.361	FALSE	18
2022-09-14	10:46:24	1.8249	458.186	FALSE	18
2022-09-14	10:46:25	2.84032	461.026	FALSE	18
2022-09-14	10:46:25	2.60286	463.629	FALSE	18
2022-09-14	10:46:25	1.82744	465.456	FALSE	18
2022-09-14	10:46:25	1.68861	467.145	FALSE	18
2022-09-14	10:46:26	1.43981	468.585	FALSE	18
2022-09-14	10:46:26	1.16347	469.748	FALSE	18
2022-09-14	10:46:26	1.23808	470.986	FALSE	18
2022-09-14	10:46:27	1.15131	472.137	FALSE	18
2022-09-14	10:46:27	1.32643	473.464	FALSE	18
2022-09-14	10:46:27	1.40352	474.867	FALSE	18
2022-09-14	10:46:27	1.38429	476.252	FALSE	18
2022-09-14	10:46:28	1.41111	477.663	FALSE	18
2022-09-14	10:46:28	1.32357	478.986	FALSE	18
2022-09-14	10:46:28	1.23966	480.226	FALSE	18
2022-09-14	10:46:28	1.30581	481.532	FALSE	18
2022-09-14	10:46:29	1.13416	482.666	FALSE	18
2022-09-14	10:46:29	1.12301	483.789	FALSE	18
2022-09-14	10:46:29	0.749733	484.539	FALSE	18
2022-09-14	10:46:29	0.348868	484.888	FALSE	18
2022-09-14	10:46:30	0.185	485.073	FALSE	18
2022-09-14	10:46:30	-0.00695905	485.073	FALSE	18
2022-09-14	10:46:30	-0.087417	485.073	FALSE	18
2022-09-14	10:46:31	-0.171743	485.073	FALSE	18
2022-09-14	10:46:31	-0.277341	485.073	FALSE	18
2022-09-14	10:46:31	-0.254185	485.073	FALSE	18
2022-09-14	10:46:31	-0.22701	485.073	FALSE	18
2022-09-14	10:46:32	-0.414796	485.073	FALSE	18
2022-09-14	10:46:32	-0.434083	485.073	FALSE	18
2022-09-14	10:46:32	-0.236221	485.073	FALSE	18
2022-09-14	10:46:32	-0.0279768	485.073	FALSE	18
2022-09-14	10:46:33	-0.0588674	485.073	FALSE	18
2022-09-14	10:46:33	0.594364	485.667	FALSE	18
2022-09-14	10:46:33	1.60195	487.269	FALSE	18
2022-09-14	10:46:33	2.21808	489.487	FALSE	18
2022-09-14	10:46:34	0.453804	489.941	FALSE	18
2022-09-14	10:46:34	0.441234	490.382	FALSE	18
2022-09-14	10:46:34	0.402354	490.784	FALSE	18
2022-09-14	10:46:35	0.264644	491.049	FALSE	18
2022-09-14	10:46:35	0.234364	491.283	FALSE	18
2022-09-14	10:46:35	0.22556	491.509	FALSE	18
2022-09-14	10:46:35	0.151921	491.661	FALSE	18
2022-09-14	10:46:36	0.0140078	491.675	FALSE	18
2022-09-14	10:46:36	0.367697	492.043	FALSE	18
2022-09-14	10:46:36	0.233906	492.276	FALSE	18
2022-09-14	10:46:36	0.0962979	492.373	FALSE	18
2022-09-14	10:46:37	0.52332	492.896	FALSE	18
2022-09-14	10:46:37	0.484135	493.38	FALSE	18
2022-09-14	10:46:37	1.00581	494.386	FALSE	18
2022-09-14	10:46:37	0.661438	495.047	FALSE	18
2022-09-14	10:46:38	0.735382	495.783	FALSE	18
2022-09-14	10:46:38	0.559707	496.343	FALSE	18
2022-09-14	10:46:38	0.733601	497.076	FALSE	18
2022-09-14	10:46:39	0.735076	497.811	FALSE	18
2022-09-14	10:46:39	0.732735	498.544	FALSE	18
2022-09-14	10:46:39	0.73472	499.279	FALSE	18
2022-09-14	10:46:39	0.739911	500.019	FALSE	18
2022-09-14	10:46:40	0.733295	500.752	FALSE	18
2022-09-14	10:46:40	0.734466	501.486	FALSE	18
2022-09-14	10:46:40	1.71248	503.199	FALSE	18
2022-09-14	10:46:40	0.244033	503.443	FALSE	18
2022-09-14	10:46:41	0.0237788	503.467	FALSE	18
2022-09-14	10:46:41	-0.0162211	503.467	FALSE	18
2022-09-14	10:46:41	0.62215	504.089	FALSE	18
2022-09-14	10:46:41	0.735585	504.824	FALSE	18
2022-09-14	10:46:42	1.37762	506.202	FALSE	18
2022-09-14	10:46:42	2.82357	509.026	FALSE	18
2022-09-14	10:46:42	2.58759	511.613	FALSE	18
2022-09-14	10:46:43	2.12123	513.734	FALSE	18
2022-09-14	10:46:43	1.34724	515.082	FALSE	18
2022-09-14	10:46:43	1.18597	516.268	FALSE	18
2022-09-14	10:46:43	0.690954	516.959	FALSE	18
2022-09-14	10:46:44	0.523728	517.482	FALSE	18
2022-09-14	10:46:44	0.459198	517.941	FALSE	18
2022-09-14	10:46:44	0.441336	518.383	FALSE	18
2022-09-14	10:46:44	0.399249	518.782	FALSE	18
2022-09-14	10:46:45	0.381489	519.164	FALSE	18
2022-09-14	10:46:45	0.336959	519.501	FALSE	18
2022-09-14	10:46:45	0.505509	520.006	FALSE	18
2022-09-14	10:46:45	0.360827	520.367	FALSE	18
2022-09-14	10:46:46	0.657773	521.025	FALSE	18
2022-09-14	10:46:46	0.395433	521.42	FALSE	18
2022-09-14	10:46:46	0.652684	522.073	FALSE	18
2022-09-14	10:46:47	0.415229	522.488	FALSE	18
2022-09-14	10:46:47	0.744745	523.233	FALSE	18
2022-09-14	10:46:47	0.462557	523.695	FALSE	18
2022-09-14	10:46:47	0.854313	524.55	FALSE	18
2022-09-14	10:46:48	0.661896	525.211	FALSE	18
2022-09-14	10:46:48	0.707392	525.919	FALSE	18
2022-09-14	10:46:48	0.659606	526.578	FALSE	18
2022-09-14	10:46:48	0.567901	527.146	FALSE	18
2022-09-14	10:46:49	0.528053	527.674	FALSE	18
2022-09-14	10:46:49	0.485662	528.16	FALSE	18
2022-09-14	10:46:49	0.532226	528.692	FALSE	18
2022-09-14	10:46:49	0.67696	529.369	FALSE	18
2022-09-14	10:46:50	0.581438	529.951	FALSE	18
2022-09-14	10:46:50	0.570751	530.521	FALSE	18
2022-09-14	10:46:50	0.387392	530.909	FALSE	18
2022-09-14	10:46:51	0.375891	531.285	FALSE	18
2022-09-14	10:46:51	0.321132	531.606	FALSE	18
2022-09-14	10:46:51	0.309173	531.915	FALSE	18
2022-09-14	10:46:51	0.367952	532.283	FALSE	18
2022-09-14	10:46:52	0.288868	532.572	FALSE	18
2022-09-14	10:46:52	0.352074	532.924	FALSE	18
2022-09-14	10:46:52	0.366985	533.291	FALSE	18
2022-09-14	10:46:52	0.342914	533.634	FALSE	18
2022-09-14	10:46:53	0.304695	533.939	FALSE	18
2022-09-14	10:46:53	0.301896	534.24	FALSE	18
2022-09-14	10:46:53	0.443982	534.684	FALSE	18
2022-09-14	10:46:53	0.16215	534.847	FALSE	18
2022-09-14	10:46:54	0.473295	535.32	FALSE	18
2022-09-14	10:46:54	0.249122	535.569	FALSE	18
2022-09-14	10:46:54	0.433244	536.002	FALSE	18
2022-09-14	10:46:55	0.263982	536.266	FALSE	18
2022-09-14	10:46:55	0.391819	536.658	FALSE	18
2022-09-14	10:46:55	0.42958	537.088	FALSE	18
2022-09-14	10:46:55	0.256705	537.344	FALSE	18
2022-09-14	10:46:56	0.461692	537.806	FALSE	18
2022-09-14	10:46:56	0.256705	538.063	FALSE	18
2022-09-14	10:46:56	0.498893	538.562	FALSE	18
2022-09-14	10:46:56	0.204746	538.766	FALSE	18
2022-09-14	10:46:57	0.366374	539.133	FALSE	18
2022-09-14	10:46:57	0.193651	539.326	FALSE	18
2022-09-14	10:46:57	0.385611	539.712	FALSE	18
2022-09-14	10:46:57	0.353957	540.066	FALSE	18
2022-09-14	10:46:58	0.403015	540.469	FALSE	18
2022-09-14	10:46:58	0.565865	541.035	FALSE	18
2022-09-14	10:46:58	1.11859	542.153	FALSE	18
2022-09-14	10:46:58	2.40749	544.561	FALSE	18
2022-09-14	10:46:59	0.63355	545.194	FALSE	18
2022-09-14	10:46:59	1.9108	547.105	FALSE	18
2022-09-14	10:46:59	0.723168	547.828	FALSE	18
2022-09-14	10:47:00	1.44627	549.275	FALSE	18
2022-09-14	10:47:00	0.820573	550.095	FALSE	18
2022-09-14	10:47:00	0.591921	550.687	FALSE	18
2022-09-14	10:47:00	0.729071	551.416	FALSE	18
2022-09-14	10:47:01	0.479249	551.896	FALSE	18
2022-09-14	10:47:01	0.765611	552.661	FALSE	18
2022-09-14	10:47:01	0.933499	553.595	FALSE	18
2022-09-14	10:47:01	1.75014	555.345	FALSE	18
2022-09-14	10:47:02	0.835484	556.18	FALSE	18
2022-09-14	10:47:02	0.78159	556.962	FALSE	18
2022-09-14	10:47:02	0.461387	557.423	FALSE	18
2022-09-14	10:47:02	0.502964	557.926	FALSE	18
2022-09-14	10:47:03	0.335178	558.261	FALSE	18
2022-09-14	10:47:03	0.372125	558.633	FALSE	18
2022-09-14	10:47:03	0.321183	558.955	FALSE	18
2022-09-14	10:47:04	0.325865	559.281	FALSE	18
2022-09-14	10:47:04	0.443677	559.724	FALSE	18
2022-09-14	10:47:04	0.16897	559.893	FALSE	18
2022-09-14	10:47:04	0.448562	560.342	FALSE	18
2022-09-14	10:47:05	0.205713	560.547	FALSE	18
2022-09-14	10:47:05	0.524848	561.072	FALSE	18
2022-09-14	10:47:05	0.534618	561.607	FALSE	18
2022-09-14	10:47:05	0.711412	562.318	FALSE	18
2022-09-14	10:47:06	0.734924	563.053	FALSE	18
2022-09-14	10:47:06	0.704084	563.757	FALSE	18
2022-09-14	10:47:06	0.719453	564.477	FALSE	18
2022-09-14	10:47:06	1.47009	565.947	FALSE	18
2022-09-14	10:47:07	0.70388	566.651	FALSE	18
2022-09-14	10:47:07	0.72444	567.375	FALSE	18
2022-09-14	10:47:07	0.699809	568.075	FALSE	18
2022-09-14	10:47:08	0.729682	568.805	FALSE	18
2022-09-14	10:47:08	0.708003	569.513	FALSE	18
2022-09-14	10:47:08	0.708715	570.221	FALSE	18
2022-09-14	10:47:08	0.698995	570.92	FALSE	18
2022-09-14	10:47:09	0.730547	571.651	FALSE	18
2022-09-14	10:47:09	0.701489	572.352	FALSE	18
2022-09-14	10:47:09	0.678995	573.031	FALSE	18
2022-09-14	10:47:09	0.616145	573.648	FALSE	18
2022-09-14	10:47:10	0.722252	574.37	FALSE	18
2022-09-14	10:47:10	0.740674	575.111	FALSE	18
2022-09-14	10:47:10	0.722862	575.833	FALSE	18
2022-09-14	10:47:10	0.728715	576.562	FALSE	18
2022-09-14	10:47:11	0.733499	577.296	FALSE	18
2022-09-14	10:47:11	0.736807	578.032	FALSE	18
2022-09-14	10:47:11	0.726781	578.759	FALSE	18
2022-09-14	10:47:12	0.734109	579.493	FALSE	18
2022-09-14	10:47:12	0.733448	580.227	FALSE	18
2022-09-14	10:47:12	0.737672	580.964	FALSE	18
2022-09-14	10:47:12	0.685509	581.65	FALSE	18
2022-09-14	10:47:13	0.807086	582.457	FALSE	18
2022-09-14	10:47:13	0.241743	582.699	FALSE	18
2022-09-14	10:47:13	0.0564506	582.755	FALSE	18
2022-09-14	10:47:13	0.583321	583.339	FALSE	18
2022-09-14	10:47:14	0.352328	583.691	FALSE	18
2022-09-14	10:47:14	0.0751783	583.766	FALSE	18
2022-09-14	10:47:14	-0.0741855	583.766	FALSE	18
2022-09-14	10:47:14	-0.369198	583.766	FALSE	18
2022-09-14	10:47:15	-0.686959	583.766	FALSE	18
2022-09-14	10:47:15	-0.790877	583.766	FALSE	18
2022-09-14	10:47:15	0.0633717	583.829	FALSE	18
2022-09-14	10:47:16	1.0076	584.837	FALSE	18
2022-09-14	10:47:16	1.21447	586.051	FALSE	18
2022-09-14	10:47:16	2.24714	588.299	FALSE	18
2022-09-14	10:47:16	2.3506	590.649	FALSE	18
2022-09-14	10:47:17	2.00841	592.658	FALSE	18
2022-09-14	10:47:17	1.46734	594.125	FALSE	18
2022-09-14	10:47:17	0.736501	594.861	FALSE	18
2022-09-14	10:47:17	0.7707	595.632	FALSE	18
2022-09-14	10:47:18	0.706832	596.339	FALSE	18
2022-09-14	10:47:18	0.775992	597.115	FALSE	18
2022-09-14	10:47:18	0.640165	597.755	FALSE	18
2022-09-14	10:47:18	0.746171	598.501	FALSE	18
2022-09-14	10:47:19	0.731768	599.233	FALSE	18
2022-09-14	10:47:19	0.729835	599.963	FALSE	18
2022-09-14	10:47:19	0.736908	600.7	FALSE	18
2022-09-14	10:47:20	0.73416	601.434	FALSE	18
2022-09-14	10:47:20	0.736094	602.17	FALSE	18
2022-09-14	10:47:20	0.735229	602.905	FALSE	18
2022-09-14	10:47:20	0.727137	603.632	FALSE	18
2022-09-14	10:47:21	0.74841	604.381	FALSE	18
2022-09-14	10:47:21	0.708257	605.089	FALSE	18
2022-09-14	10:47:21	0.69874	605.788	FALSE	18
2022-09-14	10:47:21	0.526476	606.314	FALSE	18
2022-09-14	10:47:22	0.538232	606.853	FALSE	18
2022-09-14	10:47:22	0.578435	607.431	FALSE	18
2022-09-14	10:47:22	0.932837	608.364	FALSE	18
2022-09-14	10:47:22	1.27106	609.635	FALSE	18
2022-09-14	10:47:23	1.41172	611.047	FALSE	18
2022-09-14	10:47:23	0.939453	611.986	FALSE	18
2022-09-14	10:47:23	0.730343	612.716	FALSE	18
2022-09-14	10:47:24	0.733346	613.45	FALSE	18
2022-09-14	10:47:24	0.743982	614.194	FALSE	18
2022-09-14	10:47:24	0.736399	614.93	FALSE	18
2022-09-14	10:47:24	0.737214	615.667	FALSE	18
2022-09-14	10:47:25	0.671005	616.338	FALSE	18
2022-09-14	10:47:25	0.59243	616.931	FALSE	18
2022-09-14	10:47:25	0.735789	617.667	FALSE	18
2022-09-14	10:47:25	0.726629	618.393	FALSE	18
2022-09-14	10:47:26	0.736196	619.129	FALSE	18
2022-09-14	10:47:26	0.734568	619.864	FALSE	18
2022-09-14	10:47:26	0.729631	620.594	FALSE	18
2022-09-14	10:47:27	0.730547	621.324	FALSE	18
2022-09-14	10:47:27	0.734822	622.059	FALSE	18
2022-09-14	10:47:27	0.731463	622.79	FALSE	18
2022-09-14	10:47:27	0.730954	623.521	FALSE	18
2022-09-14	10:47:28	0.736807	624.258	FALSE	18
2022-09-14	10:47:28	0.739758	624.998	FALSE	18
2022-09-14	10:47:28	0.737265	625.735	FALSE	18
2022-09-14	10:47:28	0.731616	626.467	FALSE	18
2022-09-14	10:47:29	0.56388	627.031	FALSE	18
2022-09-14	10:47:29	0.239199	627.27	FALSE	18
2022-09-14	10:47:29	0.664338	627.934	FALSE	18
2022-09-14	10:47:29	0.727392	628.662	FALSE	18
2022-09-14	10:47:30	0.738995	629.401	FALSE	18
2022-09-14	10:47:30	0.736705	630.137	FALSE	18
2022-09-14	10:47:30	0.666781	630.804	FALSE	18
2022-09-14	10:47:30	0.557875	631.362	FALSE	18
2022-09-14	10:47:31	-0.708383	631.362	FALSE	18
2022-09-14	10:47:31	-0.815406	631.362	FALSE	18
2022-09-14	10:47:31	-0.788638	631.362	FALSE	18
2022-09-14	10:47:31	-0.673829	631.362	FALSE	18
2022-09-14	10:47:32	-0.674643	631.362	FALSE	18
2022-09-14	10:47:32	-0.717595	631.362	FALSE	18
2022-09-14	10:47:32	-1.28121	631.362	FALSE	18
2022-09-14	10:47:33	-1.60991	631.362	FALSE	18
2022-09-14	10:47:33	0.843779	632.206	FALSE	18
2022-09-14	10:47:33	0.720827	632.927	FALSE	18
2022-09-14	10:47:33	1.14866	634.075	FALSE	18
2022-09-14	10:47:34	2.48576	636.561	FALSE	18
2022-09-14	10:47:34	1.69925	638.26	FALSE	18
2022-09-14	10:47:34	0.550293	638.811	FALSE	18
2022-09-14	10:47:34	0.463066	639.274	FALSE	18
2022-09-14	10:47:35	0.424949	639.699	FALSE	18
2022-09-14	10:47:35	0.381692	640.08	FALSE	18
2022-09-14	10:47:35	0.260369	640.341	FALSE	18
2022-09-14	10:47:35	0.03813	640.379	FALSE	18
2022-09-14	10:47:36	-0.0207504	640.379	FALSE	18
2022-09-14	10:47:36	-0.141157	640.379	FALSE	18
2022-09-14	10:47:36	-0.21103	640.379	FALSE	18
2022-09-14	10:47:37	-0.26757	640.379	FALSE	18
2022-09-14	10:47:37	-0.244414	640.379	FALSE	18
2022-09-14	10:47:37	-0.262531	640.379	FALSE	18
2022-09-14	10:47:37	-0.162837	640.379	FALSE	18
2022-09-14	10:47:38	0.00321909	640.382	FALSE	18
2022-09-14	10:47:38	0.0974684	640.479	FALSE	18
2022-09-14	10:47:38	0.503066	640.983	FALSE	18
2022-09-14	10:47:38	0.729886	641.712	FALSE	18
2022-09-14	10:47:39	0.735178	642.448	FALSE	18
2022-09-14	10:47:39	0.698638	643.146	FALSE	18
2022-09-14	10:47:39	0.712786	643.859	FALSE	18
2022-09-14	10:47:39	0.697265	644.556	FALSE	18
2022-09-14	10:47:40	0.717417	645.274	FALSE	18
2022-09-14	10:47:40	0.711056	645.985	FALSE	18
2022-09-14	10:47:40	0.719402	646.704	FALSE	18
2022-09-14	10:47:41	0.692888	647.397	FALSE	18
2022-09-14	10:47:41	0.664491	648.062	FALSE	18
2022-09-14	10:47:41	1.54246	649.604	FALSE	18
2022-09-14	10:47:41	4.82591	654.43	1	19
2022-09-14	10:47:42	5.27431	659.704	1	20
2022-09-14	10:47:42	4.27909	663.983	1	21
2022-09-14	10:47:42	4.4706	668.454	1	22
2022-09-14	10:47:42	5.3537	673.808	1	23
2022-09-14	10:47:43	3.12454	676.932	1	24
2022-09-14	10:47:43	3.49197	680.424	1	25
2022-09-14	10:47:43	3.18098	683.605	1	26
2022-09-14	10:47:43	1.82719	685.432	FALSE	26
2022-09-14	10:47:44	0.710293	686.143	FALSE	26
2022-09-14	10:47:44	0.519555	686.662	FALSE	26
2022-09-14	10:47:44	0.583677	687.246	FALSE	26
2022-09-14	10:47:45	0.741794	687.988	FALSE	26
2022-09-14	10:47:45	0.744339	688.732	FALSE	26
2022-09-14	10:47:45	0.737112	689.469	FALSE	26
2022-09-14	10:47:45	0.735076	690.204	FALSE	26
2022-09-14	10:47:46	0.732583	690.937	FALSE	26
2022-09-14	10:47:46	0.739758	691.676	FALSE	26
2022-09-14	10:47:46	0.730496	692.407	FALSE	26
2022-09-14	10:47:46	0.739758	693.147	FALSE	26
2022-09-14	10:47:47	0.738689	693.885	FALSE	26
2022-09-14	10:47:47	0.732684	694.618	FALSE	26
2022-09-14	10:47:47	0.732277	695.35	FALSE	26
2022-09-14	10:47:47	0.732379	696.083	FALSE	26
2022-09-14	10:47:48	0.73299	696.816	FALSE	26
2022-09-14	10:47:48	0.729071	697.545	FALSE	26
2022-09-14	10:47:48	0.739046	698.284	FALSE	26
2022-09-14	10:47:49	0.735483	699.019	FALSE	26
2022-09-14	10:47:49	0.734211	699.754	FALSE	26
2022-09-14	10:47:49	0.734669	700.488	FALSE	26
2022-09-14	10:47:49	0.732532	701.221	FALSE	26
2022-09-14	10:47:50	0.735585	701.956	FALSE	26
2022-09-14	10:47:50	0.734771	702.691	FALSE	26
2022-09-14	10:47:50	0.73701	703.428	FALSE	26
2022-09-14	10:47:50	0.735433	704.164	FALSE	26
2022-09-14	10:47:51	0.732074	704.896	FALSE	26
2022-09-14	10:47:51	0.737722	705.633	FALSE	26
2022-09-14	10:47:51	0.734262	706.368	FALSE	26
2022-09-14	10:47:51	0.734568	707.102	FALSE	26
2022-09-14	10:47:52	0.736654	707.839	FALSE	26
2022-09-14	10:47:52	0.73187	708.571	FALSE	26
2022-09-14	10:47:52	0.735483	709.306	FALSE	26
2022-09-14	10:47:53	0.739911	710.046	FALSE	26
2022-09-14	10:47:53	0.733295	710.779	FALSE	26
2022-09-14	10:47:53	0.738537	711.518	FALSE	26
2022-09-14	10:47:53	0.778791	712.297	FALSE	26
2022-09-14	10:47:54	0.567086	712.864	FALSE	26
2022-09-14	10:47:54	0.735382	713.599	FALSE	26
2022-09-14	10:47:54	0.736501	714.336	FALSE	26
2022-09-14	10:47:54	0.741285	715.077	FALSE	26
2022-09-14	10:47:55	0.737519	715.814	FALSE	26
2022-09-14	10:47:55	0.414873	716.229	FALSE	26
2022-09-14	10:47:55	0.642048	716.871	FALSE	26
2022-09-14	10:47:55	0.734466	717.606	FALSE	26
2022-09-14	10:47:56	0.732328	718.338	FALSE	26
2022-09-14	10:47:56	0.735433	719.074	FALSE	26
2022-09-14	10:47:56	0.736603	719.81	FALSE	26
2022-09-14	10:47:57	0.738333	720.549	FALSE	26
2022-09-14	10:47:57	0.350445	720.899	FALSE	26
2022-09-14	10:47:57	0.687188	721.586	FALSE	26
2022-09-14	10:47:57	0.676247	722.262	FALSE	26
2022-09-14	10:47:58	0.671056	722.934	FALSE	26
2022-09-14	10:47:58	0.693448	723.627	FALSE	26
2022-09-14	10:47:58	0.686934	724.314	FALSE	26
2022-09-14	10:47:58	0.687901	725.002	FALSE	26
2022-09-14	10:47:59	0.693448	725.695	FALSE	26
2022-09-14	10:47:59	0.685407	726.381	FALSE	26
2022-09-14	10:47:59	0.689224	727.07	FALSE	26
2022-09-14	10:47:59	0.678486	727.748	FALSE	26
2022-09-14	10:48:00	0.657672	728.406	FALSE	26
2022-09-14	10:48:00	0.703728	729.11	FALSE	26
2022-09-14	10:48:00	0.657112	729.767	FALSE	26
2022-09-14	10:48:00	0.551718	730.319	FALSE	26
2022-09-14	10:48:01	0.691412	731.01	FALSE	26
2022-09-14	10:48:01	0.723015	731.733	FALSE	26
2022-09-14	10:48:01	0.705814	732.439	FALSE	26
2022-09-14	10:48:02	0.712277	733.151	FALSE	26
2022-09-14	10:48:02	0.696247	733.847	FALSE	26
2022-09-14	10:48:02	0.692888	734.54	FALSE	26
2022-09-14	10:48:02	0.697315	735.238	FALSE	26
2022-09-14	10:48:03	0.684288	735.922	FALSE	26
2022-09-14	10:48:03	0.63299	736.555	FALSE	26
2022-09-14	10:48:03	0.599046	737.154	FALSE	26
2022-09-14	10:48:03	0.615484	737.769	FALSE	26
2022-09-14	10:48:04	0.5993	738.369	FALSE	26
2022-09-14	10:48:04	0.57014	738.939	FALSE	26
2022-09-14	10:48:04	0.562455	739.501	FALSE	26
2022-09-14	10:48:04	0.532226	740.033	FALSE	26
2022-09-14	10:48:05	0.556603	740.59	FALSE	26
2022-09-14	10:48:05	0.610852	741.201	FALSE	26
2022-09-14	10:48:05	0.644491	741.845	FALSE	26
2022-09-14	10:48:06	0.615789	742.461	FALSE	26
2022-09-14	10:48:06	0.637825	743.099	FALSE	26
2022-09-14	10:48:06	0.586069	743.685	FALSE	26
2022-09-14	10:48:06	0.510191	744.195	FALSE	26
2022-09-14	10:48:07	0.519504	744.715	FALSE	26
2022-09-14	10:48:07	0.535687	745.25	FALSE	26
2022-09-14	10:48:07	0.565509	745.816	FALSE	26
2022-09-14	10:48:07	0.609122	746.425	FALSE	26
2022-09-14	10:48:08	0.609122	747.034	FALSE	26
2022-09-14	10:48:08	0.604949	747.639	FALSE	26
2022-09-14	10:48:08	0.532023	748.171	FALSE	26
2022-09-14	10:48:08	0.477061	748.648	FALSE	26
2022-09-14	10:48:09	0.76327	749.412	FALSE	26
2022-09-14	10:48:09	0.771768	750.183	FALSE	26
2022-09-14	10:48:09	1.59462	751.778	FALSE	26
2022-09-14	10:48:10	2.96281	754.741	FALSE	26
2022-09-14	10:48:10	3.21742	757.958	1	27
2022-09-14	10:48:10	2.83121	760.789	FALSE	27
2022-09-14	10:48:10	2.91894	763.708	FALSE	27
2022-09-14	10:48:11	1.46408	765.172	FALSE	27
2022-09-14	10:48:11	0.734008	765.906	FALSE	27
2022-09-14	10:48:11	0.702048	766.608	FALSE	27
2022-09-14	10:48:11	-0.865228	766.608	FALSE	27
2022-09-14	10:48:12	2.33645	768.945	FALSE	27
2022-09-14	10:48:12	3.44709	772.392	1	28
2022-09-14	10:48:12	1.41844	773.81	FALSE	28
2022-09-14	10:48:12	1.73615	775.547	FALSE	28
2022-09-14	10:48:13	0.584695	776.131	FALSE	28
2022-09-14	10:48:13	0.553652	776.685	FALSE	28
2022-09-14	10:48:13	0.662557	777.347	FALSE	28
2022-09-14	10:48:14	1.6935	779.041	FALSE	28
2022-09-14	10:48:14	2.66551	781.706	FALSE	28
2022-09-14	10:48:14	4.16368	785.87	1	29
2022-09-14	10:48:14	3.49248	789.363	1	30
2022-09-14	10:48:15	3.51334	792.876	1	31
2022-09-14	10:48:15	4.3424	797.218	1	32
2022-09-14	10:48:15	4.34734	801.566	1	33
2022-09-14	10:48:15	4.04983	805.616	1	34
2022-09-14	10:48:16	2.46749	808.083	FALSE	34
2022-09-14	10:48:16	0.920267	809.003	FALSE	34
2022-09-14	10:48:16	1.01223	810.016	FALSE	34
2022-09-14	10:48:16	2.27681	812.292	FALSE	34
2022-09-14	10:48:17	1.64653	813.939	FALSE	34
2022-09-14	10:48:17	1.56989	815.509	FALSE	34
2022-09-14	10:48:17	0.828206	816.337	FALSE	34
2022-09-14	10:48:18	0.634567	816.972	FALSE	34
2022-09-14	10:48:18	1.17309	818.145	FALSE	34
2022-09-14	10:48:18	0.561183	818.706	FALSE	34
2022-09-14	10:48:18	0.246578	818.952	FALSE	34
2022-09-14	10:48:19	-0.705534	818.952	FALSE	34
2022-09-14	10:48:19	0.218995	819.171	FALSE	34
2022-09-14	10:48:19	0.153143	819.325	FALSE	34
2022-09-14	10:48:19	0.181285	819.506	FALSE	34
2022-09-14	10:48:20	0.653448	820.159	FALSE	34
2022-09-14	10:48:20	0.305611	820.465	FALSE	34
2022-09-14	10:48:20	0.283728	820.749	FALSE	34
2022-09-14	10:48:20	0.10383	820.852	FALSE	34
2022-09-14	10:48:21	0.0143132	820.867	FALSE	34
2022-09-14	10:48:21	-0.848282	820.867	FALSE	34
2022-09-14	10:48:21	-1.22329	820.867	FALSE	34
2022-09-14	10:48:22	-0.0429387	820.867	FALSE	34
2022-09-14	10:48:22	-1.1209	820.867	FALSE	34
2022-09-14	10:48:22	-0.874694	820.867	FALSE	34
2022-09-14	10:48:22	-0.950165	820.867	FALSE	34
2022-09-14	10:48:23	-1.01342	820.867	FALSE	34
2022-09-14	10:48:23	-1.03322	820.867	FALSE	34
2022-09-14	10:48:23	-1.05123	820.867	FALSE	34
2022-09-14	10:48:23	-0.811844	820.867	FALSE	34
2022-09-14	10:48:24	0.651768	821.519	FALSE	34
2022-09-14	10:48:24	-0.107417	821.519	FALSE	34
2022-09-14	10:48:24	-0.406704	821.519	FALSE	34
2022-09-14	10:48:24	-0.526145	821.519	FALSE	34
2022-09-14	10:48:25	-0.596628	821.519	FALSE	34
2022-09-14	10:48:25	-0.628994	821.519	FALSE	34
2022-09-14	10:48:25	-0.623294	821.519	FALSE	34
2022-09-14	10:48:26	-0.631284	821.519	FALSE	34
2022-09-14	10:48:26	-0.714694	821.519	FALSE	34
2022-09-14	10:48:26	-0.734694	821.519	FALSE	34
2022-09-14	10:48:26	-0.61332	821.519	FALSE	34
2022-09-14	10:48:27	-0.687518	821.519	FALSE	34
2022-09-14	10:48:27	-0.551793	821.519	FALSE	34
2022-09-14	10:48:27	-0.652048	821.519	FALSE	34
2022-09-14	10:48:27	-0.685177	821.519	FALSE	34
2022-09-14	10:48:28	-0.719427	821.519	FALSE	34
2022-09-14	10:48:28	-0.67617	821.519	FALSE	34
2022-09-14	10:48:28	-0.679376	821.519	FALSE	34
2022-09-14	10:48:28	-0.686348	821.519	FALSE	34
2022-09-14	10:48:29	-0.754083	821.519	FALSE	34
2022-09-14	10:48:29	-0.765534	821.519	FALSE	34
2022-09-14	10:48:29	-0.754694	821.519	FALSE	34
2022-09-14	10:48:29	-0.760394	821.519	FALSE	34
2022-09-14	10:48:30	-0.747162	821.519	FALSE	34
2022-09-14	10:48:30	-0.756068	821.519	FALSE	34
2022-09-14	10:48:30	-0.805228	821.519	FALSE	34
2022-09-14	10:48:31	-0.806246	821.519	FALSE	34
2022-09-14	10:48:31	-0.905534	821.519	FALSE	34
2022-09-14	10:48:31	-0.956373	821.519	FALSE	34
2022-09-14	10:48:31	-1.08131	821.519	FALSE	34
2022-09-14	10:48:32	-1.10818	821.519	FALSE	34
2022-09-14	10:48:32	-1.09932	821.519	FALSE	34
2022-09-14	10:48:32	-1.19398	821.519	FALSE	34
2022-09-14	10:48:32	-1.31922	821.519	FALSE	34
2022-09-14	10:48:33	-1.29281	821.519	FALSE	34
2022-09-14	10:48:33	-1.21067	821.519	FALSE	34
2022-09-14	10:48:33	-1.14233	821.519	FALSE	34
2022-09-14	10:48:33	-1.09205	821.519	FALSE	34
2022-09-14	10:48:34	-0.979987	821.519	FALSE	34
2022-09-14	10:48:34	-0.951539	821.519	FALSE	34
2022-09-14	10:48:34	-0.845177	821.519	FALSE	34
2022-09-14	10:48:35	-0.852302	821.519	FALSE	34
2022-09-14	10:48:35	-0.809961	821.519	FALSE	34
2022-09-14	10:48:35	-1.11179	821.519	FALSE	34
2022-09-14	10:48:35	-1.07205	821.519	FALSE	34
2022-09-14	10:48:36	-0.60131	821.519	FALSE	34
2022-09-14	10:48:36	-0.215509	821.519	FALSE	34
2022-09-14	10:48:36	-0.108587	821.519	FALSE	34
2022-09-14	10:48:36	-0.109046	821.519	FALSE	34
2022-09-14	10:48:37	-0.0969335	821.519	FALSE	34
2022-09-14	10:48:37	-0.435763	821.519	FALSE	34
2022-09-14	10:48:37	-1.00681	821.519	FALSE	34
2022-09-14	10:48:37	-1.07932	821.519	FALSE	34
2022-09-14	10:48:38	-1.01424	821.519	FALSE	34
2022-09-14	10:48:38	-0.994949	821.519	FALSE	34
2022-09-14	10:48:38	-1.00238	821.519	FALSE	34
2022-09-14	10:48:39	-1.02304	821.519	FALSE	34
2022-09-14	10:48:39	-0.988333	821.519	FALSE	34
2022-09-14	10:48:39	-0.995966	821.519	FALSE	34
2022-09-14	10:48:39	-0.046043	821.519	FALSE	34
2022-09-14	10:48:40	-0.786195	821.519	FALSE	34
2022-09-14	10:48:40	0.301285	821.82	FALSE	34
2022-09-14	10:48:40	1.06403	822.884	FALSE	34
2022-09-14	10:48:40	2.6282	825.512	FALSE	34
2022-09-14	10:48:41	1.31828	826.83	FALSE	34
2022-09-14	10:48:41	0.581641	827.412	FALSE	34
2022-09-14	10:48:41	0.710089	828.122	FALSE	34
2022-09-14	10:48:41	-0.641768	828.122	FALSE	34
2022-09-14	10:48:42	-1.18299	828.122	FALSE	34
2022-09-14	10:48:42	-1.1634	828.122	FALSE	34
2022-09-14	10:48:42	-1.26299	828.122	FALSE	34
2022-09-14	10:48:43	-1.16543	828.122	FALSE	34
2022-09-14	10:48:43	-1.27383	828.122	FALSE	34
2022-09-14	10:48:43	-1.14513	828.122	FALSE	34
2022-09-14	10:48:43	-1.25424	828.122	FALSE	34
2022-09-14	10:48:44	-1.16569	828.122	FALSE	34
2022-09-14	10:48:44	-1.2324	828.122	FALSE	34
2022-09-14	10:48:44	-1.18482	828.122	FALSE	34
2022-09-14	10:48:44	-1.17953	828.122	FALSE	34
2022-09-14	10:48:45	0.466781	828.589	FALSE	34
2022-09-14	10:48:45	0.771005	829.36	FALSE	34
2022-09-14	10:48:45	1.25752	830.617	FALSE	34
2022-09-14	10:48:45	1.81604	832.433	FALSE	34
2022-09-14	10:48:46	0.945814	833.379	FALSE	34
2022-09-14	10:48:46	3.19731	836.577	1	35
2022-09-14	10:48:46	4.28683	840.863	1	36
2022-09-14	10:48:47	3.08739	843.951	1	37
2022-09-14	10:48:47	6.34876	850.299	1	38
2022-09-14	10:48:47	3.98749	854.287	1	39
2022-09-14	10:48:47	1.14108	855.428	FALSE	39
2022-09-14	10:48:48	0.458588	855.887	FALSE	39
2022-09-14	10:48:48	0.316552	856.203	FALSE	39
2022-09-14	10:48:48	0.730903	856.934	FALSE	39
2022-09-14	10:48:48	0.736196	857.67	FALSE	39
2022-09-14	10:48:49	0.551056	858.221	FALSE	39
2022-09-14	10:48:49	0.732226	858.954	FALSE	39
2022-09-14	10:48:49	0.741234	859.695	FALSE	39
2022-09-14	10:48:49	0.745153	860.44	FALSE	39
2022-09-14	10:48:50	0.735433	861.175	FALSE	39
2022-09-14	10:48:50	0.431107	861.607	FALSE	39
2022-09-14	10:48:50	0.448257	862.055	FALSE	39
2022-09-14	10:48:50	0.262354	862.317	FALSE	39
2022-09-14	10:48:51	0.414924	862.732	FALSE	39
2022-09-14	10:48:51	0.167239	862.899	FALSE	39
2022-09-14	10:48:51	0.346832	863.246	FALSE	39
2022-09-14	10:48:52	0.0627101	863.309	FALSE	39
2022-09-14	10:48:52	0.170496	863.479	FALSE	39
2022-09-14	10:48:52	0.0588934	863.538	FALSE	39
2022-09-14	10:48:52	0.202761	863.741	FALSE	39
2022-09-14	10:48:53	0.124593	863.866	FALSE	39
2022-09-14	10:48:53	0.406985	864.273	FALSE	39
2022-09-14	10:48:53	0.370242	864.643	FALSE	39
2022-09-14	10:48:53	0.51411	865.157	FALSE	39
2022-09-14	10:48:54	0.415585	865.572	FALSE	39
2022-09-14	10:48:54	0.329886	865.902	FALSE	39
2022-09-14	10:48:54	0.375229	866.278	FALSE	39
2022-09-14	10:48:54	0.243982	866.522	FALSE	39
2022-09-14	10:48:55	0.37355	866.895	FALSE	39
2022-09-14	10:48:55	0.464797	867.36	FALSE	39
2022-09-14	10:48:55	1.19462	868.555	FALSE	39
2022-09-14	10:48:56	1.29599	869.851	FALSE	39
2022-09-14	10:48:56	1.47772	871.328	FALSE	39
2022-09-14	10:48:56	1.13156	872.46	FALSE	39
2022-09-14	10:48:56	1.04449	873.504	FALSE	39
2022-09-14	10:48:57	0.517214	874.022	FALSE	39
2022-09-14	10:48:57	0.803168	874.825	FALSE	39
2022-09-14	10:48:57	0.404644	875.229	FALSE	39
2022-09-14	10:48:57	0.900114	876.129	FALSE	39
2022-09-14	10:48:58	0.861183	876.991	FALSE	39
2022-09-14	10:48:58	0.670191	877.661	FALSE	39
2022-09-14	10:48:58	0.641132	878.302	FALSE	39
2022-09-14	10:48:58	3.20597	881.508	1	40
2022-09-14	10:48:59	0.706629	882.215	FALSE	40
2022-09-14	10:48:59	0.458995	882.674	FALSE	40
2022-09-14	10:48:59	0.431412	883.105	FALSE	40
2022-09-14	10:49:00	0.384389	883.489	FALSE	40
2022-09-14	10:49:00	0.462303	883.952	FALSE	40
2022-09-14	10:49:00	0.230446	884.182	FALSE	40
2022-09-14	10:49:00	0.335433	884.518	FALSE	40
2022-09-14	10:49:01	0.257214	884.775	FALSE	40
2022-09-14	10:49:01	0.367494	885.142	FALSE	40
2022-09-14	10:49:01	0.286069	885.428	FALSE	40
2022-09-14	10:49:01	0.37299	885.801	FALSE	40
2022-09-14	10:49:02	0.483168	886.284	FALSE	40
2022-09-14	10:49:02	0.341794	886.626	FALSE	40
2022-09-14	10:49:02	0.411718	887.038	FALSE	40
2022-09-14	10:49:02	0.294059	887.332	FALSE	40
2022-09-14	10:49:03	0.496145	887.828	FALSE	40
2022-09-14	10:49:03	0.221539	888.05	FALSE	40
2022-09-14	10:49:03	0.517264	888.567	FALSE	40
2022-09-14	10:49:04	0.285458	888.852	FALSE	40
2022-09-14	10:49:04	0.517315	889.37	FALSE	40
2022-09-14	10:49:04	0.236298	889.606	FALSE	40
2022-09-14	10:49:04	0.46841	890.074	FALSE	40
2022-09-14	10:49:05	0.285051	890.36	FALSE	40
2022-09-14	10:49:05	0.478842	890.838	FALSE	40
2022-09-14	10:49:05	0.362913	891.201	FALSE	40
2022-09-14	10:49:05	0.448766	891.65	FALSE	40
2022-09-14	10:49:06	0.448155	892.098	FALSE	40
2022-09-14	10:49:06	0.398588	892.497	FALSE	40
2022-09-14	10:49:06	0.516501	893.013	FALSE	40
2022-09-14	10:49:06	0.452583	893.466	FALSE	40
2022-09-14	10:49:07	0.464644	893.931	FALSE	40
2022-09-14	10:49:07	0.470395	894.401	FALSE	40
2022-09-14	10:49:07	0.477265	894.878	FALSE	40
2022-09-14	10:49:08	0.500369	895.379	FALSE	40
2022-09-14	10:49:08	0.478842	895.857	FALSE	40
2022-09-14	10:49:08	0.995941	896.853	FALSE	40
2022-09-14	10:49:08	5.93288	902.786	1	41
2022-09-14	10:49:09	1.38637	904.173	FALSE	41
2022-09-14	10:49:09	0.741081	904.914	FALSE	41
2022-09-14	10:49:09	0.545203	905.459	FALSE	41
2022-09-14	10:49:09	0.53584	905.995	FALSE	41
2022-09-14	10:49:10	0.458333	906.453	FALSE	41
2022-09-14	10:49:10	0.46215	906.915	FALSE	41
2022-09-14	10:49:10	0.460573	907.376	FALSE	41

## Sheet: Ursula_martin_2022914104350
						**GoPro Fitting: 1032
2022-09-14	10:43:51	2.6021
2022-09-14	10:43:51	2.57701
2022-09-14	10:43:51	2.74805
2022-09-14	10:43:51	5.9278
2022-09-14	10:43:51	6.07003
2022-09-14	10:43:52	6.05136
2022-09-14	10:43:52	4.09111
2022-09-14	10:43:52	1.64449
2022-09-14	10:43:52	1.51844
2022-09-14	10:43:53	1.31711
2022-09-14	10:43:53	1.41136
2022-09-14	10:43:53	1.81274
2022-09-14	10:43:53	1.5165
2022-09-14	10:43:54	0.9736
2022-09-14	10:43:54	0.458028
2022-09-14	10:43:54	0.372634
2022-09-14	10:43:55	0.387748
2022-09-14	10:43:55	0.405814
2022-09-14	10:43:55	0.329173
2022-09-14	10:43:55	0.380725
2022-09-14	10:43:56	0.35182
2022-09-14	10:43:56	0.334568
2022-09-14	10:43:56	0.434059
2022-09-14	10:43:56	0.288868
2022-09-14	10:43:57	0.312379
2022-09-14	10:43:57	0.424848
2022-09-14	10:43:57	0.395687
2022-09-14	10:43:57	0.369987
2022-09-14	10:43:58	0.386832
2022-09-14	10:43:58	0.381692
2022-09-14	10:43:58	0.370445
2022-09-14	10:43:59	0.350903
2022-09-14	10:43:59	0.429987
2022-09-14	10:43:59	0.415738
2022-09-14	10:43:59	0.399351
2022-09-14	10:44:00	0.390547
2022-09-14	10:44:00	0.405662
2022-09-14	10:44:00	0.407494
2022-09-14	10:44:00	0.388664
2022-09-14	10:44:01	0.394313
2022-09-14	10:44:01	0.384389
2022-09-14	10:44:01	0.398639
2022-09-14	10:44:01	0.394008
2022-09-14	10:44:02	0.387646
2022-09-14	10:44:02	0.36383
2022-09-14	10:44:02	0.407087
2022-09-14	10:44:03	0.37411
2022-09-14	10:44:03	0.322863
2022-09-14	10:44:03	0.389071
2022-09-14	10:44:03	0.352328
2022-09-14	10:44:04	0.373092
2022-09-14	10:44:04	0.388104
2022-09-14	10:44:04	0.396451
2022-09-14	10:44:04	0.391667
2022-09-14	10:44:05	0.413244
2022-09-14	10:44:05	0.399657
2022-09-14	10:44:05	0.379758
2022-09-14	10:44:05	0.457774
2022-09-14	10:44:06	0.422405
2022-09-14	10:44:06	0.370903
2022-09-14	10:44:06	0.44902
2022-09-14	10:44:07	1.30709
2022-09-14	10:44:07	1.43528
2022-09-14	10:44:07	3.94719
2022-09-14	10:44:07	4.74372
2022-09-14	10:44:08	1.86866
2022-09-14	10:44:08	2.14052
2022-09-14	10:44:08	1.47401
2022-09-14	10:44:08	1.10653
2022-09-14	10:44:09	0.470344
2022-09-14	10:44:09	0.236501
2022-09-14	10:44:09	0.121387
2022-09-14	10:44:09	0.195026
2022-09-14	10:44:10	0.109071
2022-09-14	10:44:10	0.0843895
2022-09-14	10:44:10	0.512939
2022-09-14	10:44:11	0.620573
2022-09-14	10:44:11	0.554364
2022-09-14	10:44:11	0.663371
2022-09-14	10:44:11	0.5364
2022-09-14	10:44:12	0.623982
2022-09-14	10:44:12	0.315992
2022-09-14	10:44:12	0.247239
2022-09-14	10:44:12	0.293244
2022-09-14	10:44:13	0.100064
2022-09-14	10:44:13	0.336654
2022-09-14	10:44:13	0.175585
2022-09-14	10:44:14	0.346018
2022-09-14	10:44:14	0.178893
2022-09-14	10:44:14	0.375433
2022-09-14	10:44:14	1.00016
2022-09-14	10:44:15	0.556959
2022-09-14	10:44:15	0.747443
2022-09-14	10:44:15	0.649631
2022-09-14	10:44:15	-0.647518
2022-09-14	10:44:16	-0.452913
2022-09-14	10:44:16	0.263575
2022-09-14	10:44:16	0.926527
2022-09-14	10:44:16	0.57243
2022-09-14	10:44:17	0.461183
2022-09-14	10:44:17	0.249835
2022-09-14	10:44:17	0.561285
2022-09-14	10:44:17	0.366374
2022-09-14	10:44:18	0.457774
2022-09-14	10:44:18	0.423168
2022-09-14	10:44:18	0.462863
2022-09-14	10:44:19	0.353804
2022-09-14	10:44:19	0.340573
2022-09-14	10:44:19	0.453092
2022-09-14	10:44:19	0.440369
2022-09-14	10:44:20	0.467647
2022-09-14	10:44:20	0.493193
2022-09-14	10:44:20	0.459809
2022-09-14	10:44:20	0.650954
2022-09-14	10:44:21	3.49136
2022-09-14	10:44:21	0.335178
2022-09-14	10:44:21	0.19472
2022-09-14	10:44:21	0.218995
2022-09-14	10:44:22	0.31584
2022-09-14	10:44:22	0.358639
2022-09-14	10:44:22	0.383982
2022-09-14	10:44:23	0.347596
2022-09-14	10:44:23	0.523575
2022-09-14	10:44:23	1.14246
2022-09-14	10:44:23	1.76836
2022-09-14	10:44:24	1.30831
2022-09-14	10:44:24	0.614262
2022-09-14	10:44:24	0.611768
2022-09-14	10:44:24	0.735433
2022-09-14	10:44:25	0.376094
2022-09-14	10:44:25	0.374771
2022-09-14	10:44:25	0.439708
2022-09-14	10:44:25	0.185356
2022-09-14	10:44:26	0.205153
2022-09-14	10:44:26	0.23411
2022-09-14	10:44:26	0.149937
2022-09-14	10:44:27	0.292481
2022-09-14	10:44:27	0.190089
2022-09-14	10:44:27	0.174059
2022-09-14	10:44:27	0.185611
2022-09-14	10:44:28	0.170293
2022-09-14	10:44:28	0.300624
2022-09-14	10:44:28	0.111362
2022-09-14	10:44:28	0.253855
2022-09-14	10:44:29	0.0944149
2022-09-14	10:44:29	0.294262
2022-09-14	10:44:29	0.0455091
2022-09-14	10:44:29	0.257774
2022-09-14	10:44:30	0.148359
2022-09-14	10:44:30	0.260115
2022-09-14	10:44:30	0.175992
2022-09-14	10:44:30	0.29757
2022-09-14	10:44:31	0.159097
2022-09-14	10:44:31	0.099962
2022-09-14	10:44:31	0.13757
2022-09-14	10:44:32	0.213448
2022-09-14	10:44:32	0.406832
2022-09-14	10:44:32	0.18383
2022-09-14	10:44:32	0.353448
2022-09-14	10:44:33	0.14673
2022-09-14	10:44:33	0.35645
2022-09-14	10:44:33	0.0461707
2022-09-14	10:44:33	0.225306
2022-09-14	10:44:34	0.181336
2022-09-14	10:44:34	0.191463
2022-09-14	10:44:34	0.0154837
2022-09-14	10:44:34	0.109428
2022-09-14	10:44:35	0.0619468
2022-09-14	10:44:35	-0.0534221
2022-09-14	10:44:35	-0.135152
2022-09-14	10:44:36	-0.0356104
2022-09-14	10:44:36	-0.211895
2022-09-14	10:44:36	-0.314745
2022-09-14	10:44:36	-0.479936
2022-09-14	10:44:37	-0.264058
2022-09-14	10:44:37	-0.212048
2022-09-14	10:44:37	0.011616
2022-09-14	10:44:37	-0.0182567
2022-09-14	10:44:38	0.340115
2022-09-14	10:44:38	1.06999
2022-09-14	10:44:38	2.25284
2022-09-14	10:44:38	3.85518
2022-09-14	10:44:39	3.96393
2022-09-14	10:44:39	3.41548
2022-09-14	10:44:39	3.85406
2022-09-14	10:44:40	2.268
2022-09-14	10:44:40	1.89365
2022-09-14	10:44:40	1.51238
2022-09-14	10:44:40	1.20663
2022-09-14	10:44:41	1.33716
2022-09-14	10:44:41	1.25843
2022-09-14	10:44:41	1.43996
2022-09-14	10:44:41	1.21502
2022-09-14	10:44:42	1.21655
2022-09-14	10:44:42	1.29177
2022-09-14	10:44:42	1.26042
2022-09-14	10:44:42	1.29691
2022-09-14	10:44:43	1.34719
2022-09-14	10:44:43	1.31467
2022-09-14	10:44:43	2.02989
2022-09-14	10:44:44	1.60637
2022-09-14	10:44:44	1.7105
2022-09-14	10:44:44	0.804593
2022-09-14	10:44:44	0.421896
2022-09-14	10:44:45	0.291361
2022-09-14	10:44:45	0.370089
2022-09-14	10:44:45	0.386272
2022-09-14	10:44:45	0.150293
2022-09-14	10:44:46	-0.116068
2022-09-14	10:44:46	-0.175458
2022-09-14	10:44:46	-0.202379
2022-09-14	10:44:46	0.515687
2022-09-14	10:44:47	0.29243
2022-09-14	10:44:47	-0.131692
2022-09-14	10:44:47	-0.062328
2022-09-14	10:44:48	-0.231336
2022-09-14	10:44:48	-0.033015
2022-09-14	10:44:48	-0.150216
2022-09-14	10:44:48	0.0322267
2022-09-14	10:44:49	-0.15047
2022-09-14	10:44:49	0.064186
2022-09-14	10:44:49	-0.0238038
2022-09-14	10:44:49	0.099962
2022-09-14	10:44:50	-0.134389
2022-09-14	10:44:50	0.00215038
2022-09-14	10:44:50	-0.0438547
2022-09-14	10:44:50	0.0233717
2022-09-14	10:44:51	-0.153727
2022-09-14	10:44:51	0.0118705
2022-09-14	10:44:51	-0.124007
2022-09-14	10:44:52	-0.00426182
2022-09-14	10:44:52	0.48444
2022-09-14	10:44:52	1.72006
2022-09-14	10:44:52	1.98531
2022-09-14	10:44:53	2.20785
2022-09-14	10:44:53	1.68266
2022-09-14	10:44:53	1.45472
2022-09-14	10:44:53	1.20342
2022-09-14	10:44:54	0.907494
2022-09-14	10:44:54	1.04357
2022-09-14	10:44:54	0.747646
2022-09-14	10:44:55	0.43126
2022-09-14	10:44:55	0.246934
2022-09-14	10:44:55	0.159097
2022-09-14	10:44:55	0.162659
2022-09-14	10:44:56	0.704593
2022-09-14	10:44:56	0.0468832
2022-09-14	10:44:56	-0.0163738
2022-09-14	10:44:56	-0.00899467
2022-09-14	10:44:57	-0.114389
2022-09-14	10:44:57	-0.03673
2022-09-14	10:44:57	-0.0973407
2022-09-14	10:44:57	0.0711071
2022-09-14	10:44:58	-0.104923
2022-09-14	10:44:58	0.0542623
2022-09-14	10:44:58	-0.104364
2022-09-14	10:44:58	0.0482572
2022-09-14	10:44:59	0.086934
2022-09-14	10:44:59	0.292176
2022-09-14	10:44:59	0.289835
2022-09-14	10:45:00	0.350802
2022-09-14	10:45:00	0.716959
2022-09-14	10:45:00	0.610852
2022-09-14	10:45:00	0.705814
2022-09-14	10:45:01	0.895331
2022-09-14	10:45:01	0.708257
2022-09-14	10:45:01	0.646628
2022-09-14	10:45:01	0.912735
2022-09-14	10:45:02	0.931005
2022-09-14	10:45:02	1.12057
2022-09-14	10:45:02	0.817824
2022-09-14	10:45:02	0.36897
2022-09-14	10:45:03	0.0438297
2022-09-14	10:45:03	-0.170979
2022-09-14	10:45:03	-0.279427
2022-09-14	10:45:04	-0.40589
2022-09-14	10:45:04	-0.499732
2022-09-14	10:45:04	-0.551844
2022-09-14	10:45:04	-0.565228
2022-09-14	10:45:05	-0.592811
2022-09-14	10:45:05	-0.692251
2022-09-14	10:45:05	-0.642073
2022-09-14	10:45:05	-0.737289
2022-09-14	10:45:06	-0.647162
2022-09-14	10:45:06	-0.849147
2022-09-14	10:45:06	-0.657646
2022-09-14	10:45:06	-0.7379
2022-09-14	10:45:07	-0.606806
2022-09-14	10:45:07	-0.621005
2022-09-14	10:45:07	-0.321157
2022-09-14	10:45:08	-0.179834
2022-09-14	10:45:08	-0.208231
2022-09-14	10:45:08	-0.0103687
2022-09-14	10:45:08	-0.0145417
2022-09-14	10:45:09	0.184542
2022-09-14	10:45:09	-0.181768
2022-09-14	10:45:09	-0.00217532
2022-09-14	10:45:09	-0.094847
2022-09-14	10:45:10	-0.0365773
2022-09-14	10:45:10	-0.157544
2022-09-14	10:45:10	0.0193514
2022-09-14	10:45:10	0.0213361
2022-09-14	10:45:11	0.360725
2022-09-14	10:45:11	0.216094
2022-09-14	10:45:11	0.431718
2022-09-14	10:45:11	0.291921
2022-09-14	10:45:12	0.383422
2022-09-14	10:45:12	0.225407
2022-09-14	10:45:12	0.179097
2022-09-14	10:45:13	0.542659
2022-09-14	10:45:13	0.731819
2022-09-14	10:45:13	0.917315
2022-09-14	10:45:13	0.76327
2022-09-14	10:45:14	1.15925
2022-09-14	10:45:14	1.55497
2022-09-14	10:45:14	1.92078
2022-09-14	10:45:14	1.77426
2022-09-14	10:45:15	1.42383
2022-09-14	10:45:15	0.814109
2022-09-14	10:45:15	0.70271
2022-09-14	10:45:15	0.803982
2022-09-14	10:45:16	0.712277
2022-09-14	10:45:16	0.640827
2022-09-14	10:45:16	0.620522
2022-09-14	10:45:17	0.622913
2022-09-14	10:45:17	0.647952
2022-09-14	10:45:17	0.624542
2022-09-14	10:45:17	0.626883
2022-09-14	10:45:18	0.742354
2022-09-14	10:45:18	0.78958
2022-09-14	10:45:18	0.874059
2022-09-14	10:45:18	1.01279
2022-09-14	10:45:19	0.948919
2022-09-14	10:45:19	0.736145
2022-09-14	10:45:19	0.660166
2022-09-14	10:45:19	0.603015
2022-09-14	10:45:20	0.587646
2022-09-14	10:45:20	0.586985
2022-09-14	10:45:20	0.708664
2022-09-14	10:45:21	1.06083
2022-09-14	10:45:21	1.47253
2022-09-14	10:45:21	1.62877
2022-09-14	10:45:21	1.46368
2022-09-14	10:45:22	1.36505
2022-09-14	10:45:22	0.993448
2022-09-14	10:45:22	0.774873
2022-09-14	10:45:22	0.761488
2022-09-14	10:45:23	0.702099
2022-09-14	10:45:23	0.765509
2022-09-14	10:45:23	0.173295
2022-09-14	10:45:23	0.186578
2022-09-14	10:45:24	0.200115
2022-09-14	10:45:24	0.710598
2022-09-14	10:45:24	0.703575
2022-09-14	10:45:25	0.658791
2022-09-14	10:45:25	0.644237
2022-09-14	10:45:25	0.759605
2022-09-14	10:45:25	0.775229
2022-09-14	10:45:26	0.633448
2022-09-14	10:45:26	0.729428
2022-09-14	10:45:26	0.714058
2022-09-14	10:45:26	0.677773
2022-09-14	10:45:27	0.677773
2022-09-14	10:45:27	0.689936
2022-09-14	10:45:27	0.6593
2022-09-14	10:45:27	0.651005
2022-09-14	10:45:28	0.637722
2022-09-14	10:45:28	0.590954
2022-09-14	10:45:28	0.614415
2022-09-14	10:45:29	0.616807
2022-09-14	10:45:29	0.523626
2022-09-14	10:45:29	0.55187
2022-09-14	10:45:29	0.393448
2022-09-14	10:45:30	0.400064
2022-09-14	10:45:30	0.23986
2022-09-14	10:45:30	0.0500893
2022-09-14	10:45:30	-0.106501
2022-09-14	10:45:31	-0.144771
2022-09-14	10:45:31	0.621845
2022-09-14	10:45:31	0.619555
2022-09-14	10:45:31	0.459555
2022-09-14	10:45:32	0.597061
2022-09-14	10:45:32	0.747646
2022-09-14	10:45:32	0.462049
2022-09-14	10:45:33	0.797723
2022-09-14	10:45:33	1.17548
2022-09-14	10:45:33	1.09996
2022-09-14	10:45:33	1.61645
2022-09-14	10:45:34	1.87472
2022-09-14	10:45:34	2.2077
2022-09-14	10:45:34	2.85732
2022-09-14	10:45:34	1.87686
2022-09-14	10:45:35	1.95248
2022-09-14	10:45:35	1.68953
2022-09-14	10:45:35	1.44938
2022-09-14	10:45:35	1.32927
2022-09-14	10:45:36	1.21228
2022-09-14	10:45:36	1.33681
2022-09-14	10:45:36	1.69864
2022-09-14	10:45:37	1.65212
2022-09-14	10:45:37	2.01411
2022-09-14	10:45:37	2.42765
2022-09-14	10:45:37	2.61874
2022-09-14	10:45:38	3.72189
2022-09-14	10:45:38	4.61034
2022-09-14	10:45:38	4.51258
2022-09-14	10:45:38	3.24474
2022-09-14	10:45:39	2.43996
2022-09-14	10:45:39	1.74485
2022-09-14	10:45:39	1.18877
2022-09-14	10:45:39	1.24246
2022-09-14	10:45:40	1.78622
2022-09-14	10:45:40	2.53604
2022-09-14	10:45:40	2.3481
2022-09-14	10:45:41	1.47019
2022-09-14	10:45:41	0.924236
2022-09-14	10:45:41	0.882506
2022-09-14	10:45:41	0.79701
2022-09-14	10:45:42	0.896603
2022-09-14	10:45:42	0.904746
2022-09-14	10:45:42	0.922354
2022-09-14	10:45:42	0.876298
2022-09-14	10:45:43	0.786578
2022-09-14	10:45:43	0.888104
2022-09-14	10:45:43	1.08668
2022-09-14	10:45:43	1.04449
2022-09-14	10:45:44	1.03218
2022-09-14	10:45:44	1.10475
2022-09-14	10:45:44	1.03243
2022-09-14	10:45:45	0.875127
2022-09-14	10:45:45	0.964338
2022-09-14	10:45:45	1.03289
2022-09-14	10:45:45	0.86846
2022-09-14	10:45:46	0.679046
2022-09-14	10:45:46	0.522913
2022-09-14	10:45:46	0.476298
2022-09-14	10:45:46	0.524542
2022-09-14	10:45:47	0.740623
2022-09-14	10:45:47	1.01757
2022-09-14	10:45:47	1.43187
2022-09-14	10:45:47	2.3681
2022-09-14	10:45:48	2.08261
2022-09-14	10:45:48	2.04408
2022-09-14	10:45:48	1.86765
2022-09-14	10:45:48	1.47966
2022-09-14	10:45:49	1.38144
2022-09-14	10:45:49	1.73477
2022-09-14	10:45:49	1.391
2022-09-14	10:45:50	1.41798
2022-09-14	10:45:50	1.49187
2022-09-14	10:45:50	1.71523
2022-09-14	10:45:50	1.58327
2022-09-14	10:45:51	1.58892
2022-09-14	10:45:51	1.65136
2022-09-14	10:45:51	1.53268
2022-09-14	10:45:51	1.6279
2022-09-14	10:45:52	1.69391
2022-09-14	10:45:52	1.75141
2022-09-14	10:45:52	1.72179
2022-09-14	10:45:52	1.75899
2022-09-14	10:45:53	1.48551
2022-09-14	10:45:53	1.34576
2022-09-14	10:45:53	1.14439
2022-09-14	10:45:54	1.19421
2022-09-14	10:45:54	0.834313
2022-09-14	10:45:54	1.09004
2022-09-14	10:45:54	0.976094
2022-09-14	10:45:55	1.31401
2022-09-14	10:45:55	1.13905
2022-09-14	10:45:55	0.869377
2022-09-14	10:45:55	0.789479
2022-09-14	10:45:56	0.588613
2022-09-14	10:45:56	0.460827
2022-09-14	10:45:56	0.38612
2022-09-14	10:45:56	0.245611
2022-09-14	10:45:57	0.221081
2022-09-14	10:45:57	-0.14528
2022-09-14	10:45:57	-0.580089
2022-09-14	10:45:58	0.413702
2022-09-14	10:45:58	-0.304262
2022-09-14	10:45:58	-0.380445
2022-09-14	10:45:58	-0.516323
2022-09-14	10:45:59	-0.617544
2022-09-14	10:45:59	-0.619732
2022-09-14	10:45:59	-0.70645
2022-09-14	10:45:59	-0.761259
2022-09-14	10:46:00	-0.770317
2022-09-14	10:46:00	-0.691895
2022-09-14	10:46:00	-0.638206
2022-09-14	10:46:00	-0.780903
2022-09-14	10:46:01	-0.85673
2022-09-14	10:46:01	-0.838205
2022-09-14	10:46:01	-0.787162
2022-09-14	10:46:02	-0.826908
2022-09-14	10:46:02	-0.749503
2022-09-14	10:46:02	-0.760241
2022-09-14	10:46:02	-0.657086
2022-09-14	10:46:03	-0.657493
2022-09-14	10:46:03	-0.418206
2022-09-14	10:46:03	-0.301666
2022-09-14	10:46:03	-0.0709793
2022-09-14	10:46:04	0.0339061
2022-09-14	10:46:04	0.199046
2022-09-14	10:46:04	0.223372
2022-09-14	10:46:04	0.475026
2022-09-14	10:46:05	0.5907
2022-09-14	10:46:05	0.638842
2022-09-14	10:46:05	1.02495
2022-09-14	10:46:06	0.413295
2022-09-14	10:46:06	0.430802
2022-09-14	10:46:06	0.295789
2022-09-14	10:46:06	0.243728
2022-09-14	10:46:07	0.299097
2022-09-14	10:46:07	0.14729
2022-09-14	10:46:07	0.259962
2022-09-14	10:46:07	0.101234
2022-09-14	10:46:08	0.269377
2022-09-14	10:46:08	0.0155346
2022-09-14	10:46:08	0.238079
2022-09-14	10:46:08	0.0653565
2022-09-14	10:46:09	0.123779
2022-09-14	10:46:09	0.00433869
2022-09-14	10:46:09	0.169631
2022-09-14	10:46:10	0.0322267
2022-09-14	10:46:10	0.0816923
2022-09-14	10:46:10	-0.0978496
2022-09-14	10:46:10	0.037214
2022-09-14	10:46:11	-0.0968317
2022-09-14	10:46:11	0.0319723
2022-09-14	10:46:11	-0.0603941
2022-09-14	10:46:11	0.140624
2022-09-14	10:46:12	0.0546694
2022-09-14	10:46:12	0.233906
2022-09-14	10:46:12	0.258842
2022-09-14	10:46:12	0.638232
2022-09-14	10:46:13	0.531667
2022-09-14	10:46:13	0.801692
2022-09-14	10:46:13	0.59701
2022-09-14	10:46:14	0.586119
2022-09-14	10:46:14	0.579402
2022-09-14	10:46:14	0.90729
2022-09-14	10:46:14	0.68327
2022-09-14	10:46:15	0.557315
2022-09-14	10:46:15	0.470496
2022-09-14	10:46:15	0.574822
2022-09-14	10:46:15	0.647646
2022-09-14	10:46:16	0.593651
2022-09-14	10:46:16	0.497061
2022-09-14	10:46:16	0.529071
2022-09-14	10:46:16	0.530089
2022-09-14	10:46:17	0.50327
2022-09-14	10:46:17	0.552277
2022-09-14	10:46:17	0.531056
2022-09-14	10:46:18	0.914211
2022-09-14	10:46:18	1.77309
2022-09-14	10:46:18	2.79207
2022-09-14	10:46:18	2.54006
2022-09-14	10:46:19	2.43543
2022-09-14	10:46:19	1.69762
2022-09-14	10:46:19	1.19996
2022-09-14	10:46:19	1.89126
2022-09-14	10:46:20	4.71426
2022-09-14	10:46:20	7.18179
2022-09-14	10:46:20	2.65925
2022-09-14	10:46:20	1.41274
2022-09-14	10:46:21	1.94709
2022-09-14	10:46:21	2.98581
2022-09-14	10:46:21	3.13314
2022-09-14	10:46:22	2.20765
2022-09-14	10:46:22	2.21726
2022-09-14	10:46:22	2.1791
2022-09-14	10:46:22	2.34877
2022-09-14	10:46:23	1.9505
2022-09-14	10:46:23	1.57711
2022-09-14	10:46:23	1.46419
2022-09-14	10:46:23	1.14195
2022-09-14	10:46:24	0.727748
2022-09-14	10:46:24	1.08454
2022-09-14	10:46:24	2.10393
2022-09-14	10:46:24	1.8249
2022-09-14	10:46:25	2.84032
2022-09-14	10:46:25	2.60286
2022-09-14	10:46:25	1.82744
2022-09-14	10:46:25	1.68861
2022-09-14	10:46:26	1.43981
2022-09-14	10:46:26	1.16347
2022-09-14	10:46:26	1.23808
2022-09-14	10:46:27	1.15131
2022-09-14	10:46:27	1.32643
2022-09-14	10:46:27	1.40352
2022-09-14	10:46:27	1.38429
2022-09-14	10:46:28	1.41111
2022-09-14	10:46:28	1.32357
2022-09-14	10:46:28	1.23966
2022-09-14	10:46:28	1.30581
2022-09-14	10:46:29	1.13416
2022-09-14	10:46:29	1.12301
2022-09-14	10:46:29	0.749733
2022-09-14	10:46:29	0.348868
2022-09-14	10:46:30	0.185
2022-09-14	10:46:30	-0.00695905
2022-09-14	10:46:30	-0.087417
2022-09-14	10:46:31	-0.171743
2022-09-14	10:46:31	-0.277341
2022-09-14	10:46:31	-0.254185
2022-09-14	10:46:31	-0.22701
2022-09-14	10:46:32	-0.414796
2022-09-14	10:46:32	-0.434083
2022-09-14	10:46:32	-0.236221
2022-09-14	10:46:32	-0.0279768
2022-09-14	10:46:33	-0.0588674
2022-09-14	10:46:33	0.594364
2022-09-14	10:46:33	1.60195
2022-09-14	10:46:33	2.21808
2022-09-14	10:46:34	0.453804
2022-09-14	10:46:34	0.441234
2022-09-14	10:46:34	0.402354
2022-09-14	10:46:35	0.264644
2022-09-14	10:46:35	0.234364
2022-09-14	10:46:35	0.22556
2022-09-14	10:46:35	0.151921
2022-09-14	10:46:36	0.0140078
2022-09-14	10:46:36	0.367697
2022-09-14	10:46:36	0.233906
2022-09-14	10:46:36	0.0962979
2022-09-14	10:46:37	0.52332
2022-09-14	10:46:37	0.484135
2022-09-14	10:46:37	1.00581
2022-09-14	10:46:37	0.661438
2022-09-14	10:46:38	0.735382
2022-09-14	10:46:38	0.559707
2022-09-14	10:46:38	0.733601
2022-09-14	10:46:39	0.735076
2022-09-14	10:46:39	0.732735
2022-09-14	10:46:39	0.73472
2022-09-14	10:46:39	0.739911
2022-09-14	10:46:40	0.733295
2022-09-14	10:46:40	0.734466
2022-09-14	10:46:40	1.71248
2022-09-14	10:46:40	0.244033
2022-09-14	10:46:41	0.0237788
2022-09-14	10:46:41	-0.0162211
2022-09-14	10:46:41	0.62215
2022-09-14	10:46:41	0.735585
2022-09-14	10:46:42	1.37762
2022-09-14	10:46:42	2.82357
2022-09-14	10:46:42	2.58759
2022-09-14	10:46:43	2.12123
2022-09-14	10:46:43	1.34724
2022-09-14	10:46:43	1.18597
2022-09-14	10:46:43	0.690954
2022-09-14	10:46:44	0.523728
2022-09-14	10:46:44	0.459198
2022-09-14	10:46:44	0.441336
2022-09-14	10:46:44	0.399249
2022-09-14	10:46:45	0.381489
2022-09-14	10:46:45	0.336959
2022-09-14	10:46:45	0.505509
2022-09-14	10:46:45	0.360827
2022-09-14	10:46:46	0.657773
2022-09-14	10:46:46	0.395433
2022-09-14	10:46:46	0.652684
2022-09-14	10:46:47	0.415229
2022-09-14	10:46:47	0.744745
2022-09-14	10:46:47	0.462557
2022-09-14	10:46:47	0.854313
2022-09-14	10:46:48	0.661896
2022-09-14	10:46:48	0.707392
2022-09-14	10:46:48	0.659606
2022-09-14	10:46:48	0.567901
2022-09-14	10:46:49	0.528053
2022-09-14	10:46:49	0.485662
2022-09-14	10:46:49	0.532226
2022-09-14	10:46:49	0.67696
2022-09-14	10:46:50	0.581438
2022-09-14	10:46:50	0.570751
2022-09-14	10:46:50	0.387392
2022-09-14	10:46:51	0.375891
2022-09-14	10:46:51	0.321132
2022-09-14	10:46:51	0.309173
2022-09-14	10:46:51	0.367952
2022-09-14	10:46:52	0.288868
2022-09-14	10:46:52	0.352074
2022-09-14	10:46:52	0.366985
2022-09-14	10:46:52	0.342914
2022-09-14	10:46:53	0.304695
2022-09-14	10:46:53	0.301896
2022-09-14	10:46:53	0.443982
2022-09-14	10:46:53	0.16215
2022-09-14	10:46:54	0.473295
2022-09-14	10:46:54	0.249122
2022-09-14	10:46:54	0.433244
2022-09-14	10:46:55	0.263982
2022-09-14	10:46:55	0.391819
2022-09-14	10:46:55	0.42958
2022-09-14	10:46:55	0.256705
2022-09-14	10:46:56	0.461692
2022-09-14	10:46:56	0.256705
2022-09-14	10:46:56	0.498893
2022-09-14	10:46:56	0.204746
2022-09-14	10:46:57	0.366374
2022-09-14	10:46:57	0.193651
2022-09-14	10:46:57	0.385611
2022-09-14	10:46:57	0.353957
2022-09-14	10:46:58	0.403015
2022-09-14	10:46:58	0.565865
2022-09-14	10:46:58	1.11859
2022-09-14	10:46:58	2.40749
2022-09-14	10:46:59	0.63355
2022-09-14	10:46:59	1.9108
2022-09-14	10:46:59	0.723168
2022-09-14	10:47:00	1.44627
2022-09-14	10:47:00	0.820573
2022-09-14	10:47:00	0.591921
2022-09-14	10:47:00	0.729071
2022-09-14	10:47:01	0.479249
2022-09-14	10:47:01	0.765611
2022-09-14	10:47:01	0.933499
2022-09-14	10:47:01	1.75014
2022-09-14	10:47:02	0.835484
2022-09-14	10:47:02	0.78159
2022-09-14	10:47:02	0.461387
2022-09-14	10:47:02	0.502964
2022-09-14	10:47:03	0.335178
2022-09-14	10:47:03	0.372125
2022-09-14	10:47:03	0.321183
2022-09-14	10:47:04	0.325865
2022-09-14	10:47:04	0.443677
2022-09-14	10:47:04	0.16897
2022-09-14	10:47:04	0.448562
2022-09-14	10:47:05	0.205713
2022-09-14	10:47:05	0.524848
2022-09-14	10:47:05	0.534618
2022-09-14	10:47:05	0.711412
2022-09-14	10:47:06	0.734924
2022-09-14	10:47:06	0.704084
2022-09-14	10:47:06	0.719453
2022-09-14	10:47:06	1.47009
2022-09-14	10:47:07	0.70388
2022-09-14	10:47:07	0.72444
2022-09-14	10:47:07	0.699809
2022-09-14	10:47:08	0.729682
2022-09-14	10:47:08	0.708003
2022-09-14	10:47:08	0.708715
2022-09-14	10:47:08	0.698995
2022-09-14	10:47:09	0.730547
2022-09-14	10:47:09	0.701489
2022-09-14	10:47:09	0.678995
2022-09-14	10:47:09	0.616145
2022-09-14	10:47:10	0.722252
2022-09-14	10:47:10	0.740674
2022-09-14	10:47:10	0.722862
2022-09-14	10:47:10	0.728715
2022-09-14	10:47:11	0.733499
2022-09-14	10:47:11	0.736807
2022-09-14	10:47:11	0.726781
2022-09-14	10:47:12	0.734109
2022-09-14	10:47:12	0.733448
2022-09-14	10:47:12	0.737672
2022-09-14	10:47:12	0.685509
2022-09-14	10:47:13	0.807086
2022-09-14	10:47:13	0.241743
2022-09-14	10:47:13	0.0564506
2022-09-14	10:47:13	0.583321
2022-09-14	10:47:14	0.352328
2022-09-14	10:47:14	0.0751783
2022-09-14	10:47:14	-0.0741855
2022-09-14	10:47:14	-0.369198
2022-09-14	10:47:15	-0.686959
2022-09-14	10:47:15	-0.790877
2022-09-14	10:47:15	0.0633717
2022-09-14	10:47:16	1.0076
2022-09-14	10:47:16	1.21447
2022-09-14	10:47:16	2.24714
2022-09-14	10:47:16	2.3506
2022-09-14	10:47:17	2.00841
2022-09-14	10:47:17	1.46734
2022-09-14	10:47:17	0.736501
2022-09-14	10:47:17	0.7707
2022-09-14	10:47:18	0.706832
2022-09-14	10:47:18	0.775992
2022-09-14	10:47:18	0.640165
2022-09-14	10:47:18	0.746171
2022-09-14	10:47:19	0.731768
2022-09-14	10:47:19	0.729835
2022-09-14	10:47:19	0.736908
2022-09-14	10:47:20	0.73416
2022-09-14	10:47:20	0.736094
2022-09-14	10:47:20	0.735229
2022-09-14	10:47:20	0.727137
2022-09-14	10:47:21	0.74841
2022-09-14	10:47:21	0.708257
2022-09-14	10:47:21	0.69874
2022-09-14	10:47:21	0.526476
2022-09-14	10:47:22	0.538232
2022-09-14	10:47:22	0.578435
2022-09-14	10:47:22	0.932837
2022-09-14	10:47:22	1.27106
2022-09-14	10:47:23	1.41172
2022-09-14	10:47:23	0.939453
2022-09-14	10:47:23	0.730343
2022-09-14	10:47:24	0.733346
2022-09-14	10:47:24	0.743982
2022-09-14	10:47:24	0.736399
2022-09-14	10:47:24	0.737214
2022-09-14	10:47:25	0.671005
2022-09-14	10:47:25	0.59243
2022-09-14	10:47:25	0.735789
2022-09-14	10:47:25	0.726629
2022-09-14	10:47:26	0.736196
2022-09-14	10:47:26	0.734568
2022-09-14	10:47:26	0.729631
2022-09-14	10:47:27	0.730547
2022-09-14	10:47:27	0.734822
2022-09-14	10:47:27	0.731463
2022-09-14	10:47:27	0.730954
2022-09-14	10:47:28	0.736807
2022-09-14	10:47:28	0.739758
2022-09-14	10:47:28	0.737265
2022-09-14	10:47:28	0.731616
2022-09-14	10:47:29	0.56388
2022-09-14	10:47:29	0.239199
2022-09-14	10:47:29	0.664338
2022-09-14	10:47:29	0.727392
2022-09-14	10:47:30	0.738995
2022-09-14	10:47:30	0.736705
2022-09-14	10:47:30	0.666781
2022-09-14	10:47:30	0.557875
2022-09-14	10:47:31	-0.708383
2022-09-14	10:47:31	-0.815406
2022-09-14	10:47:31	-0.788638
2022-09-14	10:47:31	-0.673829
2022-09-14	10:47:32	-0.674643
2022-09-14	10:47:32	-0.717595
2022-09-14	10:47:32	-1.28121
2022-09-14	10:47:33	-1.60991
2022-09-14	10:47:33	0.843779
2022-09-14	10:47:33	0.720827
2022-09-14	10:47:33	1.14866
2022-09-14	10:47:34	2.48576
2022-09-14	10:47:34	1.69925
2022-09-14	10:47:34	0.550293
2022-09-14	10:47:34	0.463066
2022-09-14	10:47:35	0.424949
2022-09-14	10:47:35	0.381692
2022-09-14	10:47:35	0.260369
2022-09-14	10:47:35	0.03813
2022-09-14	10:47:36	-0.0207504
2022-09-14	10:47:36	-0.141157
2022-09-14	10:47:36	-0.21103
2022-09-14	10:47:37	-0.26757
2022-09-14	10:47:37	-0.244414
2022-09-14	10:47:37	-0.262531
2022-09-14	10:47:37	-0.162837
2022-09-14	10:47:38	0.00321909
2022-09-14	10:47:38	0.0974684
2022-09-14	10:47:38	0.503066
2022-09-14	10:47:38	0.729886
2022-09-14	10:47:39	0.735178
2022-09-14	10:47:39	0.698638
2022-09-14	10:47:39	0.712786
2022-09-14	10:47:39	0.697265
2022-09-14	10:47:40	0.717417
2022-09-14	10:47:40	0.711056
2022-09-14	10:47:40	0.719402
2022-09-14	10:47:41	0.692888
2022-09-14	10:47:41	0.664491
2022-09-14	10:47:41	1.54246
2022-09-14	10:47:41	4.82591
2022-09-14	10:47:42	5.27431
2022-09-14	10:47:42	4.27909
2022-09-14	10:47:42	4.4706
2022-09-14	10:47:42	5.3537
2022-09-14	10:47:43	3.12454
2022-09-14	10:47:43	3.49197
2022-09-14	10:47:43	3.18098
2022-09-14	10:47:43	1.82719
2022-09-14	10:47:44	0.710293
2022-09-14	10:47:44	0.519555
2022-09-14	10:47:44	0.583677
2022-09-14	10:47:45	0.741794
2022-09-14	10:47:45	0.744339
2022-09-14	10:47:45	0.737112
2022-09-14	10:47:45	0.735076
2022-09-14	10:47:46	0.732583
2022-09-14	10:47:46	0.739758
2022-09-14	10:47:46	0.730496
2022-09-14	10:47:46	0.739758
2022-09-14	10:47:47	0.738689
2022-09-14	10:47:47	0.732684
2022-09-14	10:47:47	0.732277
2022-09-14	10:47:47	0.732379
2022-09-14	10:47:48	0.73299
2022-09-14	10:47:48	0.729071
2022-09-14	10:47:48	0.739046
2022-09-14	10:47:49	0.735483
2022-09-14	10:47:49	0.734211
2022-09-14	10:47:49	0.734669
2022-09-14	10:47:49	0.732532
2022-09-14	10:47:50	0.735585
2022-09-14	10:47:50	0.734771
2022-09-14	10:47:50	0.73701
2022-09-14	10:47:50	0.735433
2022-09-14	10:47:51	0.732074
2022-09-14	10:47:51	0.737722
2022-09-14	10:47:51	0.734262
2022-09-14	10:47:51	0.734568
2022-09-14	10:47:52	0.736654
2022-09-14	10:47:52	0.73187
2022-09-14	10:47:52	0.735483
2022-09-14	10:47:53	0.739911
2022-09-14	10:47:53	0.733295
2022-09-14	10:47:53	0.738537
2022-09-14	10:47:53	0.778791
2022-09-14	10:47:54	0.567086
2022-09-14	10:47:54	0.735382
2022-09-14	10:47:54	0.736501
2022-09-14	10:47:54	0.741285
2022-09-14	10:47:55	0.737519
2022-09-14	10:47:55	0.414873
2022-09-14	10:47:55	0.642048
2022-09-14	10:47:55	0.734466
2022-09-14	10:47:56	0.732328
2022-09-14	10:47:56	0.735433
2022-09-14	10:47:56	0.736603
2022-09-14	10:47:57	0.738333
2022-09-14	10:47:57	0.350445
2022-09-14	10:47:57	0.687188
2022-09-14	10:47:57	0.676247
2022-09-14	10:47:58	0.671056
2022-09-14	10:47:58	0.693448
2022-09-14	10:47:58	0.686934
2022-09-14	10:47:58	0.687901
2022-09-14	10:47:59	0.693448
2022-09-14	10:47:59	0.685407
2022-09-14	10:47:59	0.689224
2022-09-14	10:47:59	0.678486
2022-09-14	10:48:00	0.657672
2022-09-14	10:48:00	0.703728
2022-09-14	10:48:00	0.657112
2022-09-14	10:48:00	0.551718
2022-09-14	10:48:01	0.691412
2022-09-14	10:48:01	0.723015
2022-09-14	10:48:01	0.705814
2022-09-14	10:48:02	0.712277
2022-09-14	10:48:02	0.696247
2022-09-14	10:48:02	0.692888
2022-09-14	10:48:02	0.697315
2022-09-14	10:48:03	0.684288
2022-09-14	10:48:03	0.63299
2022-09-14	10:48:03	0.599046
2022-09-14	10:48:03	0.615484
2022-09-14	10:48:04	0.5993
2022-09-14	10:48:04	0.57014
2022-09-14	10:48:04	0.562455
2022-09-14	10:48:04	0.532226
2022-09-14	10:48:05	0.556603
2022-09-14	10:48:05	0.610852
2022-09-14	10:48:05	0.644491
2022-09-14	10:48:06	0.615789
2022-09-14	10:48:06	0.637825
2022-09-14	10:48:06	0.586069
2022-09-14	10:48:06	0.510191
2022-09-14	10:48:07	0.519504
2022-09-14	10:48:07	0.535687
2022-09-14	10:48:07	0.565509
2022-09-14	10:48:07	0.609122
2022-09-14	10:48:08	0.609122
2022-09-14	10:48:08	0.604949
2022-09-14	10:48:08	0.532023
2022-09-14	10:48:08	0.477061
2022-09-14	10:48:09	0.76327
2022-09-14	10:48:09	0.771768
2022-09-14	10:48:09	1.59462
2022-09-14	10:48:10	2.96281
2022-09-14	10:48:10	3.21742
2022-09-14	10:48:10	2.83121
2022-09-14	10:48:10	2.91894
2022-09-14	10:48:11	1.46408
2022-09-14	10:48:11	0.734008
2022-09-14	10:48:11	0.702048
2022-09-14	10:48:11	-0.865228
2022-09-14	10:48:12	2.33645
2022-09-14	10:48:12	3.44709
2022-09-14	10:48:12	1.41844
2022-09-14	10:48:12	1.73615
2022-09-14	10:48:13	0.584695
2022-09-14	10:48:13	0.553652
2022-09-14	10:48:13	0.662557
2022-09-14	10:48:14	1.6935
2022-09-14	10:48:14	2.66551
2022-09-14	10:48:14	4.16368
2022-09-14	10:48:14	3.49248
2022-09-14	10:48:15	3.51334
2022-09-14	10:48:15	4.3424
2022-09-14	10:48:15	4.34734
2022-09-14	10:48:15	4.04983
2022-09-14	10:48:16	2.46749
2022-09-14	10:48:16	0.920267
2022-09-14	10:48:16	1.01223
2022-09-14	10:48:16	2.27681
2022-09-14	10:48:17	1.64653
2022-09-14	10:48:17	1.56989
2022-09-14	10:48:17	0.828206
2022-09-14	10:48:18	0.634567
2022-09-14	10:48:18	1.17309
2022-09-14	10:48:18	0.561183
2022-09-14	10:48:18	0.246578
2022-09-14	10:48:19	-0.705534
2022-09-14	10:48:19	0.218995
2022-09-14	10:48:19	0.153143
2022-09-14	10:48:19	0.181285
2022-09-14	10:48:20	0.653448
2022-09-14	10:48:20	0.305611
2022-09-14	10:48:20	0.283728
2022-09-14	10:48:20	0.10383
2022-09-14	10:48:21	0.0143132
2022-09-14	10:48:21	-0.848282
2022-09-14	10:48:21	-1.22329
2022-09-14	10:48:22	-0.0429387
2022-09-14	10:48:22	-1.1209
2022-09-14	10:48:22	-0.874694
2022-09-14	10:48:22	-0.950165
2022-09-14	10:48:23	-1.01342
2022-09-14	10:48:23	-1.03322
2022-09-14	10:48:23	-1.05123
2022-09-14	10:48:23	-0.811844
2022-09-14	10:48:24	0.651768
2022-09-14	10:48:24	-0.107417
2022-09-14	10:48:24	-0.406704
2022-09-14	10:48:24	-0.526145
2022-09-14	10:48:25	-0.596628
2022-09-14	10:48:25	-0.628994
2022-09-14	10:48:25	-0.623294
2022-09-14	10:48:26	-0.631284
2022-09-14	10:48:26	-0.714694
2022-09-14	10:48:26	-0.734694
2022-09-14	10:48:26	-0.61332
2022-09-14	10:48:27	-0.687518
2022-09-14	10:48:27	-0.551793
2022-09-14	10:48:27	-0.652048
2022-09-14	10:48:27	-0.685177
2022-09-14	10:48:28	-0.719427
2022-09-14	10:48:28	-0.67617
2022-09-14	10:48:28	-0.679376
2022-09-14	10:48:28	-0.686348
2022-09-14	10:48:29	-0.754083
2022-09-14	10:48:29	-0.765534
2022-09-14	10:48:29	-0.754694
2022-09-14	10:48:29	-0.760394
2022-09-14	10:48:30	-0.747162
2022-09-14	10:48:30	-0.756068
2022-09-14	10:48:30	-0.805228
2022-09-14	10:48:31	-0.806246
2022-09-14	10:48:31	-0.905534
2022-09-14	10:48:31	-0.956373
2022-09-14	10:48:31	-1.08131
2022-09-14	10:48:32	-1.10818
2022-09-14	10:48:32	-1.09932
2022-09-14	10:48:32	-1.19398
2022-09-14	10:48:32	-1.31922
2022-09-14	10:48:33	-1.29281
2022-09-14	10:48:33	-1.21067
2022-09-14	10:48:33	-1.14233
2022-09-14	10:48:33	-1.09205
2022-09-14	10:48:34	-0.979987
2022-09-14	10:48:34	-0.951539
2022-09-14	10:48:34	-0.845177
2022-09-14	10:48:35	-0.852302
2022-09-14	10:48:35	-0.809961
2022-09-14	10:48:35	-1.11179
2022-09-14	10:48:35	-1.07205
2022-09-14	10:48:36	-0.60131
2022-09-14	10:48:36	-0.215509
2022-09-14	10:48:36	-0.108587
2022-09-14	10:48:36	-0.109046
2022-09-14	10:48:37	-0.0969335
2022-09-14	10:48:37	-0.435763
2022-09-14	10:48:37	-1.00681
2022-09-14	10:48:37	-1.07932
2022-09-14	10:48:38	-1.01424
2022-09-14	10:48:38	-0.994949
2022-09-14	10:48:38	-1.00238
2022-09-14	10:48:39	-1.02304
2022-09-14	10:48:39	-0.988333
2022-09-14	10:48:39	-0.995966
2022-09-14	10:48:39	-0.046043
2022-09-14	10:48:40	-0.786195
2022-09-14	10:48:40	0.301285
2022-09-14	10:48:40	1.06403
2022-09-14	10:48:40	2.6282
2022-09-14	10:48:41	1.31828
2022-09-14	10:48:41	0.581641
2022-09-14	10:48:41	0.710089
2022-09-14	10:48:41	-0.641768
2022-09-14	10:48:42	-1.18299
2022-09-14	10:48:42	-1.1634
2022-09-14	10:48:42	-1.26299
2022-09-14	10:48:43	-1.16543
2022-09-14	10:48:43	-1.27383
2022-09-14	10:48:43	-1.14513
2022-09-14	10:48:43	-1.25424
2022-09-14	10:48:44	-1.16569
2022-09-14	10:48:44	-1.2324
2022-09-14	10:48:44	-1.18482
2022-09-14	10:48:44	-1.17953
2022-09-14	10:48:45	0.466781
2022-09-14	10:48:45	0.771005
2022-09-14	10:48:45	1.25752
2022-09-14	10:48:45	1.81604
2022-09-14	10:48:46	0.945814
2022-09-14	10:48:46	3.19731
2022-09-14	10:48:46	4.28683
2022-09-14	10:48:47	3.08739
2022-09-14	10:48:47	6.34876
2022-09-14	10:48:47	3.98749
2022-09-14	10:48:47	1.14108
2022-09-14	10:48:48	0.458588
2022-09-14	10:48:48	0.316552
2022-09-14	10:48:48	0.730903
2022-09-14	10:48:48	0.736196
2022-09-14	10:48:49	0.551056
2022-09-14	10:48:49	0.732226
2022-09-14	10:48:49	0.741234
2022-09-14	10:48:49	0.745153
2022-09-14	10:48:50	0.735433
2022-09-14	10:48:50	0.431107
2022-09-14	10:48:50	0.448257
2022-09-14	10:48:50	0.262354
2022-09-14	10:48:51	0.414924
2022-09-14	10:48:51	0.167239
2022-09-14	10:48:51	0.346832
2022-09-14	10:48:52	0.0627101
2022-09-14	10:48:52	0.170496
2022-09-14	10:48:52	0.0588934
2022-09-14	10:48:52	0.202761
2022-09-14	10:48:53	0.124593
2022-09-14	10:48:53	0.406985
2022-09-14	10:48:53	0.370242
2022-09-14	10:48:53	0.51411
2022-09-14	10:48:54	0.415585
2022-09-14	10:48:54	0.329886
2022-09-14	10:48:54	0.375229
2022-09-14	10:48:54	0.243982
2022-09-14	10:48:55	0.37355
2022-09-14	10:48:55	0.464797
2022-09-14	10:48:55	1.19462
2022-09-14	10:48:56	1.29599
2022-09-14	10:48:56	1.47772
2022-09-14	10:48:56	1.13156
2022-09-14	10:48:56	1.04449
2022-09-14	10:48:57	0.517214
2022-09-14	10:48:57	0.803168
2022-09-14	10:48:57	0.404644
2022-09-14	10:48:57	0.900114
2022-09-14	10:48:58	0.861183
2022-09-14	10:48:58	0.670191
2022-09-14	10:48:58	0.641132
2022-09-14	10:48:58	3.20597
2022-09-14	10:48:59	0.706629
2022-09-14	10:48:59	0.458995
2022-09-14	10:48:59	0.431412
2022-09-14	10:49:00	0.384389
2022-09-14	10:49:00	0.462303
2022-09-14	10:49:00	0.230446
2022-09-14	10:49:00	0.335433
2022-09-14	10:49:01	0.257214
2022-09-14	10:49:01	0.367494
2022-09-14	10:49:01	0.286069
2022-09-14	10:49:01	0.37299
2022-09-14	10:49:02	0.483168
2022-09-14	10:49:02	0.341794
2022-09-14	10:49:02	0.411718
2022-09-14	10:49:02	0.294059
2022-09-14	10:49:03	0.496145
2022-09-14	10:49:03	0.221539
2022-09-14	10:49:03	0.517264
2022-09-14	10:49:04	0.285458
2022-09-14	10:49:04	0.517315
2022-09-14	10:49:04	0.236298
2022-09-14	10:49:04	0.46841
2022-09-14	10:49:05	0.285051
2022-09-14	10:49:05	0.478842
2022-09-14	10:49:05	0.362913
2022-09-14	10:49:05	0.448766
2022-09-14	10:49:06	0.448155
2022-09-14	10:49:06	0.398588
2022-09-14	10:49:06	0.516501
2022-09-14	10:49:06	0.452583
2022-09-14	10:49:07	0.464644
2022-09-14	10:49:07	0.470395
2022-09-14	10:49:07	0.477265
2022-09-14	10:49:08	0.500369
2022-09-14	10:49:08	0.478842
2022-09-14	10:49:08	0.995941
2022-09-14	10:49:08	5.93288
2022-09-14	10:49:09	1.38637
2022-09-14	10:49:09	0.741081
2022-09-14	10:49:09	0.545203
2022-09-14	10:49:09	0.53584
2022-09-14	10:49:10	0.458333
2022-09-14	10:49:10	0.46215
2022-09-14	10:49:10	0.460573
