# Supplementary material for: Comparing efficacy in reducing pulling and welfare impacts of four types of leash walking equipment
Source: PeerJ journal article supplement (doi:10.7717/peerj.18131), 2024-10-24
Supplement: Shelter_2_Tension_files.zip [file Ursula_prong_202291414738 copy.xlsx]

## Sheet: Averaged Newtons
Date	Time	Averaged Newtons	Impulse	Total steps
2022-09-14	14:07:55	3.27535	3.27535	0		Impulse newtons=D303	740.907
2022-09-14	14:07:56	3.26133	6.53669	0		Total steps	0
2022-09-14	14:07:57	3.25975	9.79643	0
2022-09-14	14:07:58	3.25901	13.0554	0
2022-09-14	14:07:59	3.45396	16.5094	0
2022-09-14	14:08:00	3.25245	19.7619	0
2022-09-14	14:08:01	3.26303	23.0249	0
2022-09-14	14:08:02	3.21012	26.235	0
2022-09-14	14:08:03	3.26531	29.5003	0
2022-09-14	14:08:04	3.23672	32.737	0
2022-09-14	14:08:05	4.57961	37.3166	0
2022-09-14	14:08:06	3.26388	40.5805	0
2022-09-14	14:08:07	3.26018	43.8407	0
2022-09-14	14:08:08	3.26275	47.1035	0
2022-09-14	14:08:09	3.25613	50.3596	0
2022-09-14	14:08:10	3.25737	53.617	0
2022-09-14	14:08:11	3.26886	56.8858	0
2022-09-14	14:08:12	3.0473	59.9331	0
2022-09-14	14:08:13	3.24526	63.1784	0
2022-09-14	14:08:14	3.26213	66.4405	0
2022-09-14	14:08:15	3.26313	69.7036	0
2022-09-14	14:08:16	3.27271	72.9763	0
2022-09-14	14:08:17	3.25771	76.234	0
2022-09-14	14:08:18	1.13492	77.369	0
2022-09-14	14:08:19	3.21393	80.5829	0
2022-09-14	14:08:20	3.25692	83.8398	0
2022-09-14	14:08:21	3.26824	87.1081	0
2022-09-14	14:08:22	3.26603	90.3741	0
2022-09-14	14:08:23	3.34937	93.7235	0
2022-09-14	14:08:24	3.25862	96.9821	0
2022-09-14	14:08:25	3.25947	100.242	0
2022-09-14	14:08:26	3.02676	103.268	0
2022-09-14	14:08:27	3.25226	106.521	0
2022-09-14	14:08:28	5.24554	111.766	0
2022-09-14	14:08:29	3.28493	115.051	0
2022-09-14	14:08:30	3.67802	118.729	0
2022-09-14	14:08:31	3.26781	121.997	0
2022-09-14	14:08:32	3.25935	125.256	0
2022-09-14	14:08:33	3.27305	128.529	0
2022-09-14	14:08:34	3.26982	131.799	0
2022-09-14	14:08:35	3.25301	135.052	0
2022-09-14	14:08:36	3.25471	138.307	0
2022-09-14	14:08:37	3.27739	141.584	0
2022-09-14	14:08:38	3.2627	144.847	0
2022-09-14	14:08:39	3.26758	148.114	0
2022-09-14	14:08:40	3.25811	151.373	0
2022-09-14	14:08:41	3.26354	154.636	0
2022-09-14	14:08:42	3.23989	157.876	0
2022-09-14	14:08:43	3.25045	161.126	0
2022-09-14	14:08:44	3.25743	164.384	0
2022-09-14	14:08:45	3.24453	167.628	0
2022-09-14	14:08:46	3.26954	170.898	0
2022-09-14	14:08:47	3.24026	174.138	0
2022-09-14	14:08:48	3.25901	177.397	0
2022-09-14	14:08:49	3.25217	180.649	0
2022-09-14	14:08:50	3.26388	183.913	0
2022-09-14	14:08:51	3.24555	187.159	0
2022-09-14	14:08:52	3.24679	190.406	0
2022-09-14	14:08:53	3.25681	193.662	0
2022-09-14	14:08:54	3.25364	196.916	0
2022-09-14	14:08:55	3.25256	200.169	0
2022-09-14	14:08:56	3.27956	203.448	0
2022-09-14	14:08:57	2.50542	205.954	0
2022-09-14	14:08:58	-1.31414	205.954	0
2022-09-14	14:08:59	2.06864	208.022	0
2022-09-14	14:09:00	2.96241	210.985	0
2022-09-14	14:09:01	2.72625	213.711	0
2022-09-14	14:09:02	3.03864	216.75	0
2022-09-14	14:09:03	2.84879	219.598	0
2022-09-14	14:09:04	2.13808	221.736	0
2022-09-14	14:09:05	1.86473	223.601	0
2022-09-14	14:09:06	1.76785	225.369	0
2022-09-14	14:09:07	1.64887	227.018	0
2022-09-14	14:09:08	1.55546	228.573	0
2022-09-14	14:09:09	6.40841	234.982	0
2022-09-14	14:09:10	3.17509	238.157	0
2022-09-14	14:09:11	1.2574	239.414	0
2022-09-14	14:09:12	-1.255	239.414	0
2022-09-14	14:09:13	0.752402	240.167	0
2022-09-14	14:09:14	-0.319182	240.167	0
2022-09-14	14:09:15	-2.22947	240.167	0
2022-09-14	14:09:16	-2.13938	240.167	0
2022-09-14	14:09:17	-1.0992	240.167	0
2022-09-14	14:09:18	-1.0992	240.167	0
2022-09-14	14:09:19	-1.94613	240.167	0
2022-09-14	14:09:20	-0.72003	240.167	0
2022-09-14	14:09:21	-1.11884	240.167	0
2022-09-14	14:09:22	-1.01658	240.167	0
2022-09-14	14:09:23	-1.45015	240.167	0
2022-09-14	14:09:24	-1.18449	240.167	0
2022-09-14	14:09:25	2.24888	242.416	0
2022-09-14	14:09:26	4.81854	247.234	0
2022-09-14	14:09:27	0.663175	247.897	0
2022-09-14	14:09:28	2.14532	250.043	0
2022-09-14	14:09:29	2.79852	252.841	0
2022-09-14	14:09:30	2.17662	255.018	0
2022-09-14	14:09:31	2.03083	257.049	0
2022-09-14	14:09:32	1.90995	258.958	0
2022-09-14	14:09:33	1.96032	260.919	0
2022-09-14	14:09:34	2.82144	263.74	0
2022-09-14	14:09:35	2.32255	266.063	0
2022-09-14	14:09:36	3.43943	269.502	0
2022-09-14	14:09:37	2.72461	272.227	0
2022-09-14	14:09:38	1.56881	273.796	0
2022-09-14	14:09:39	1.0345	274.83	0
2022-09-14	14:09:40	1.26678	276.097	0
2022-09-14	14:09:41	2.55613	278.653	0
2022-09-14	14:09:42	1.99552	280.649	0
2022-09-14	14:09:43	1.94157	282.59	0
2022-09-14	14:09:44	1.8357	284.426	0
2022-09-14	14:09:45	1.97883	286.405	0
2022-09-14	14:09:46	1.93559	288.34	0
2022-09-14	14:09:47	3.01141	291.352	0
2022-09-14	14:09:48	6.86687	298.219	0
2022-09-14	14:09:49	2.44181	300.66	0
2022-09-14	14:09:50	3.23225	303.893	0
2022-09-14	14:09:51	3.25384	307.146	0
2022-09-14	14:09:52	3.27361	310.42	0
2022-09-14	14:09:53	3.25477	313.675	0
2022-09-14	14:09:54	3.26773	316.943	0
2022-09-14	14:09:55	3.25166	320.194	0
2022-09-14	14:09:56	0.599379	320.794	0
2022-09-14	14:09:57	0.624503	321.418	0
2022-09-14	14:09:58	3.29387	324.712	0
2022-09-14	14:09:59	3.26916	327.981	0
2022-09-14	14:10:00	3.26303	331.244	0
2022-09-14	14:10:01	3.26049	334.505	0
2022-09-14	14:10:02	3.26597	337.771	0
2022-09-14	14:10:03	3.26184	341.032	0
2022-09-14	14:10:04	3.26303	344.295	0
2022-09-14	14:10:05	3.26235	347.558	0
2022-09-14	14:10:06	3.24934	350.807	0
2022-09-14	14:10:07	3.24811	354.055	0
2022-09-14	14:10:08	3.11363	357.169	0
2022-09-14	14:10:09	1.95472	359.124	0
2022-09-14	14:10:10	3.26671	362.39	0
2022-09-14	14:10:11	3.29308	365.683	0
2022-09-14	14:10:12	3.24883	368.932	0
2022-09-14	14:10:13	2.47481	371.407	0
2022-09-14	14:10:14	0.391171	371.798	0
2022-09-14	14:10:15	2.78073	374.579	0
2022-09-14	14:10:16	-1.04651	374.579	0
2022-09-14	14:10:17	-1.78624	374.579	0
2022-09-14	14:10:18	-1.69122	374.579	0
2022-09-14	14:10:19	-1.72685	374.579	0
2022-09-14	14:10:20	-1.67532	374.579	0
2022-09-14	14:10:21	-1.4666	374.579	0
2022-09-14	14:10:22	-1.60429	374.579	0
2022-09-14	14:10:23	-1.65887	374.579	0
2022-09-14	14:10:24	-1.66983	374.579	0
2022-09-14	14:10:25	-1.63389	374.579	0
2022-09-14	14:10:26	-1.37839	374.579	0
2022-09-14	14:10:27	-1.63712	374.579	0
2022-09-14	14:10:28	-3.13383	374.579	0
2022-09-14	14:10:29	-2.29512	374.579	0
2022-09-14	14:10:30	-0.417598	374.579	0
2022-09-14	14:10:31	-0.0640808	374.579	0
2022-09-14	14:10:32	-0.149404	374.579	0
2022-09-14	14:10:33	1.54957	376.129	0
2022-09-14	14:10:34	1.92919	378.058	0
2022-09-14	14:10:35	1.87298	379.931	0
2022-09-14	14:10:36	1.80644	381.737	0
2022-09-14	14:10:37	1.78511	383.522	0
2022-09-14	14:10:38	1.75319	385.275	0
2022-09-14	14:10:39	1.70984	386.985	0
2022-09-14	14:10:40	1.63005	388.615	0
2022-09-14	14:10:41	1.55438	390.17	0
2022-09-14	14:10:42	1.51561	391.685	0
2022-09-14	14:10:43	1.55063	393.236	0
2022-09-14	14:10:44	1.64572	394.882	0
2022-09-14	14:10:45	1.7065	396.588	0
2022-09-14	14:10:46	1.73191	398.32	0
2022-09-14	14:10:47	1.69135	400.011	0
2022-09-14	14:10:48	1.63927	401.651	0
2022-09-14	14:10:49	1.58324	403.234	0
2022-09-14	14:10:50	1.51929	404.753	0
2022-09-14	14:10:51	1.50369	406.257	0
2022-09-14	14:10:52	1.53967	407.797	0
2022-09-14	14:10:53	1.57911	409.376	0
2022-09-14	14:10:54	1.44012	410.816	0
2022-09-14	14:10:55	1.19756	412.013	0
2022-09-14	14:10:56	1.05008	413.063	0
2022-09-14	14:10:57	1.14335	414.207	0
2022-09-14	14:10:58	1.1627	415.37	0
2022-09-14	14:10:59	1.20986	416.579	0
2022-09-14	14:11:00	1.30469	417.884	0
2022-09-14	14:11:01	1.35251	419.237	0
2022-09-14	14:11:02	1.40407	420.641	0
2022-09-14	14:11:03	1.43133	422.072	0
2022-09-14	14:11:04	1.39411	423.466	0
2022-09-14	14:11:05	1.34074	424.807	0
2022-09-14	14:11:06	1.27962	426.086	0
2022-09-14	14:11:07	1.23612	427.323	0
2022-09-14	14:11:08	1.25846	428.581	0
2022-09-14	14:11:09	1.18047	429.762	0
2022-09-14	14:11:10	1.17181	430.933	0
2022-09-14	14:11:11	1.30275	432.236	0
2022-09-14	14:11:12	1.44589	433.682	0
2022-09-14	14:11:13	1.54278	435.225	0
2022-09-14	14:11:14	1.61307	436.838	0
2022-09-14	14:11:15	1.68162	438.519	0
2022-09-14	14:11:16	1.75296	440.272	0
2022-09-14	14:11:17	2.00163	442.274	0
2022-09-14	14:11:18	2.23117	444.505	0
2022-09-14	14:11:19	2.05257	446.558	0
2022-09-14	14:11:20	1.9232	448.481	0
2022-09-14	14:11:21	1.9511	450.432	0
2022-09-14	14:11:22	1.40877	451.841	0
2022-09-14	14:11:23	0.785945	452.627	0
2022-09-14	14:11:24	3.27056	455.897	0
2022-09-14	14:11:25	3.26937	459.167	0
2022-09-14	14:11:26	3.28075	462.447	0
2022-09-14	14:11:27	3.25264	465.7	0
2022-09-14	14:11:28	3.1645	468.865	0
2022-09-14	14:11:29	3.23281	472.097	0
2022-09-14	14:11:30	3.24311	475.341	0
2022-09-14	14:11:31	3.23226	478.573	0
2022-09-14	14:11:32	3.23949	481.812	0
2022-09-14	14:11:33	3.2426	485.055	0
2022-09-14	14:11:34	3.2379	488.293	0
2022-09-14	14:11:35	3.24743	491.54	0
2022-09-14	14:11:36	3.23864	494.779	0
2022-09-14	14:11:37	3.24181	498.021	0
2022-09-14	14:11:38	2.78375	500.804	0
2022-09-14	14:11:39	3.27754	504.082	0
2022-09-14	14:11:40	3.26145	507.343	0
2022-09-14	14:11:41	3.25534	510.599	0
2022-09-14	14:11:42	3.2447	513.843	0
2022-09-14	14:11:43	3.26833	517.112	0
2022-09-14	14:11:44	3.26043	520.372	0
2022-09-14	14:11:45	3.26184	523.634	0
2022-09-14	14:11:46	3.26003	526.894	0
2022-09-14	14:11:47	3.26358	530.158	0
2022-09-14	14:11:48	3.25239	533.41	0
2022-09-14	14:11:49	3.25941	536.669	0
2022-09-14	14:11:50	3.2679	539.937	0
2022-09-14	14:11:51	3.26471	543.202	0
2022-09-14	14:11:52	3.26716	546.469	0
2022-09-14	14:11:53	3.26615	549.735	0
2022-09-14	14:11:54	3.25013	552.985	0
2022-09-14	14:11:55	3.25724	556.243	0
2022-09-14	14:11:56	3.25143	559.494	0
2022-09-14	14:11:57	3.26377	562.758	0
2022-09-14	14:11:58	3.25652	566.014	0
2022-09-14	14:11:59	3.2586	569.273	0
2022-09-14	14:12:00	3.25822	572.531	0
2022-09-14	14:12:01	3.25217	575.783	0
2022-09-14	14:12:02	3.26343	579.047	0
2022-09-14	14:12:03	3.24962	582.296	0
2022-09-14	14:12:04	3.27661	585.573	0
2022-09-14	14:12:05	3.24662	588.82	0
2022-09-14	14:12:06	3.2739	592.094	0
2022-09-14	14:12:07	3.25935	595.353	0
2022-09-14	14:12:08	2.46405	597.817	0
2022-09-14	14:12:09	2.23751	600.055	0
2022-09-14	14:12:10	2.95596	603.011	0
2022-09-14	14:12:11	1.97726	604.988	0
2022-09-14	14:12:12	0.9262	605.914	0
2022-09-14	14:12:13	2.47266	608.387	0
2022-09-14	14:12:14	3.26914	611.656	0
2022-09-14	14:12:15	3.2546	614.91	0
2022-09-14	14:12:16	3.25579	618.166	0
2022-09-14	14:12:17	3.25573	621.422	0
2022-09-14	14:12:18	3.25879	624.681	0
2022-09-14	14:12:19	3.25732	627.938	0
2022-09-14	14:12:20	3.2589	631.197	0
2022-09-14	14:12:21	3.25935	634.456	0
2022-09-14	14:12:22	3.2576	637.714	0
2022-09-14	14:12:23	3.25935	640.973	0
2022-09-14	14:12:24	3.17113	644.144	0
2022-09-14	14:12:25	3.2559	647.4	0
2022-09-14	14:12:26	3.40338	650.804	0
2022-09-14	14:12:27	2.4832	653.287	0
2022-09-14	14:12:28	0.93384	654.221	0
2022-09-14	14:12:29	2.77916	657	0
2022-09-14	14:12:30	3.26598	660.266	0
2022-09-14	14:12:31	3.27746	663.543	0
2022-09-14	14:12:32	3.25335	666.797	0
2022-09-14	14:12:33	3.21346	670.01	0
2022-09-14	14:12:34	3.25596	673.266	0
2022-09-14	14:12:35	3.26486	676.531	0
2022-09-14	14:12:36	2.93496	679.466	0
2022-09-14	14:12:37	3.30304	682.769	0
2022-09-14	14:12:38	3.25635	686.025	0
2022-09-14	14:12:39	3.2383	689.264	0
2022-09-14	14:12:40	3.24481	692.508	0
2022-09-14	14:12:41	3.25403	695.762	0
2022-09-14	14:12:42	3.25947	699.022	0
2022-09-14	14:12:43	3.27052	702.292	0
2022-09-14	14:12:44	3.12132	705.414	0
2022-09-14	14:12:45	3.04854	708.462	0
2022-09-14	14:12:46	3.16948	711.632	0
2022-09-14	14:12:47	3.25256	714.884	0
2022-09-14	14:12:48	3.25998	718.144	0
2022-09-14	14:12:49	3.23106	721.375	0
2022-09-14	14:12:50	3.24543	724.621	0
2022-09-14	14:12:51	3.25015	727.871	0
2022-09-14	14:12:52	3.25205	731.123	0
2022-09-14	14:12:53	3.25466	734.378	0
2022-09-14	14:12:54	3.26167	737.639	0
2022-09-14	14:12:55	3.26758	740.907	0

## Sheet: Ursula_prong_202291414738 (4)
Date	Time	Lbs	Newtons	Averaged Newtons	Total force x time		total steps > 13.345	**GoPro Fitting: 13:56
2022-09-14	14:07:55	0.736145	3.27452	3.27535	3.27452	FALSE	0
2022-09-14	14:07:55	0.731514	3.25392	3.27535	3.25392	FALSE	0
2022-09-14	14:07:55	0.741336	3.29761	3.27535	6.57213	FALSE	0
2022-09-14	14:07:56	0.73355	3.26298	3.26133	6.5169	FALSE	0
2022-09-14	14:07:56	0.730191	3.24804	3.26133	9.82017	FALSE	0
2022-09-14	14:07:56	0.733855	3.26433	3.26133	9.78123	FALSE	0
2022-09-14	14:07:56	0.735127	3.26999	3.26133	13.0902	FALSE	0
2022-09-14	14:07:57	0.734262	3.26614	3.25975	13.0474	FALSE	0
2022-09-14	14:07:57	0.733753	3.26388	3.25975	16.354	FALSE	0
2022-09-14	14:07:57	0.736603	3.27656	3.25975	16.3239	FALSE	0
2022-09-14	14:07:57	0.726679	3.23241	3.25975	19.5865	FALSE	0
2022-09-14	14:07:58	0.737061	3.27859	3.25901	19.6025	FALSE	0
2022-09-14	14:07:58	0.724084	3.22087	3.25901	22.8073	FALSE	0
2022-09-14	14:07:58	0.733295	3.26184	3.25901	22.8644	FALSE	0
2022-09-14	14:07:58	0.736196	3.27475	3.25901	26.0821	FALSE	0
2022-09-14	14:07:59	0.856857	3.81147	3.45396	26.6758	FALSE	0
2022-09-14	14:07:59	0.737875	3.28222	3.45396	29.3643	FALSE	0
2022-09-14	14:07:59	0.73472	3.26818	3.45396	29.944	FALSE	0
2022-09-14	14:08:00	0.733499	3.26275	3.25245	32.627	FALSE	0
2022-09-14	14:08:00	0.73243	3.258	3.25245	33.202	FALSE	0
2022-09-14	14:08:00	0.730751	3.25053	3.25245	35.8776	FALSE	0
2022-09-14	14:08:00	0.728054	3.23853	3.25245	36.4405	FALSE	0
2022-09-14	14:08:01	0.734975	3.26932	3.26303	39.1469	FALSE	0
2022-09-14	14:08:01	0.730852	3.25098	3.26303	39.6915	FALSE	0
2022-09-14	14:08:01	0.735382	3.27113	3.26303	42.418	FALSE	0
2022-09-14	14:08:01	0.733041	3.26071	3.26303	42.9522	FALSE	0
2022-09-14	14:08:02	0.807901	3.59371	3.21012	46.0117	FALSE	0
2022-09-14	14:08:02	0.588715	2.61872	3.21012	45.571	FALSE	0
2022-09-14	14:08:02	0.750649	3.33904	3.21012	49.3507	FALSE	0
2022-09-14	14:08:02	0.739402	3.28901	3.21012	48.86	FALSE	0
2022-09-14	14:08:03	0.732786	3.25958	3.26531	52.6103	FALSE	0
2022-09-14	14:08:03	0.738537	3.28516	3.26531	52.1451	FALSE	0
2022-09-14	14:08:03	0.730903	3.2512	3.26531	55.8615	FALSE	0
2022-09-14	14:08:04	0.727952	3.23808	3.23672	55.3832	FALSE	0
2022-09-14	14:08:04	0.733499	3.26275	3.23672	59.1243	FALSE	0
2022-09-14	14:08:04	0.726781	3.23287	3.23672	58.6161	FALSE	0
2022-09-14	14:08:04	0.722354	3.21318	3.23672	62.3375	FALSE	0
2022-09-14	14:08:05	1.4736	6.55487	4.57961	65.1709	FALSE	0
2022-09-14	14:08:05	1.17258	5.21587	4.57961	67.5533	FALSE	0
2022-09-14	14:08:05	0.739402	3.28901	4.57961	68.4599	FALSE	0
2022-09-14	14:08:05	0.732583	3.25868	4.57961	70.812	FALSE	0
2022-09-14	14:08:06	0.735178	3.27022	3.26388	71.7302	FALSE	0
2022-09-14	14:08:06	0.730343	3.24871	3.26388	74.0607	FALSE	0
2022-09-14	14:08:06	0.736959	3.27814	3.26388	75.0083	FALSE	0
2022-09-14	14:08:06	0.732532	3.25845	3.26388	77.3192	FALSE	0
2022-09-14	14:08:07	0.728664	3.24124	3.26018	78.2495	FALSE	0
2022-09-14	14:08:07	0.735585	3.27203	3.26018	80.5912	FALSE	0
2022-09-14	14:08:07	0.734517	3.26728	3.26018	81.5168	FALSE	0
2022-09-14	14:08:08	0.733499	3.26275	3.26275	83.8539	FALSE	0
2022-09-14	14:08:08	0.730191	3.24804	3.26275	84.7649	FALSE	0
2022-09-14	14:08:08	0.738028	3.2829	3.26275	87.1368	FALSE	0
2022-09-14	14:08:08	0.732277	3.25731	3.26275	88.0222	FALSE	0
2022-09-14	14:08:09	0.733244	3.26162	3.25613	90.3985	FALSE	0
2022-09-14	14:08:09	0.733651	3.26343	3.25613	91.2856	FALSE	0
2022-09-14	14:08:09	0.729936	3.2469	3.25613	93.6454	FALSE	0
2022-09-14	14:08:09	0.731209	3.25256	3.25613	94.5382	FALSE	0
2022-09-14	14:08:10	0.73187	3.2555	3.25737	96.9009	FALSE	0
2022-09-14	14:08:10	0.729428	3.24464	3.25737	97.7828	FALSE	0
2022-09-14	14:08:10	0.737824	3.28199	3.25737	100.183	FALSE	0
2022-09-14	14:08:10	0.730038	3.24736	3.25737	101.03	FALSE	0
2022-09-14	14:08:11	0.729784	3.24623	3.26886	103.429	FALSE	0
2022-09-14	14:08:11	0.739707	3.29036	3.26886	104.321	FALSE	0
2022-09-14	14:08:11	0.735127	3.26999	3.26886	106.699	FALSE	0
2022-09-14	14:08:12	0.734415	3.26682	3.0473	107.587	FALSE	0
2022-09-14	14:08:12	0.733753	3.26388	3.0473	109.963	FALSE	0
2022-09-14	14:08:12	0.731921	3.25573	3.0473	110.843	FALSE	0
2022-09-14	14:08:12	0.540165	2.40276	3.0473	112.366	FALSE	0
2022-09-14	14:08:13	0.718435	3.19574	3.24526	114.039	FALSE	0
2022-09-14	14:08:13	0.731972	3.25596	3.24526	115.622	FALSE	0
2022-09-14	14:08:13	0.733957	3.26479	3.24526	117.304	FALSE	0
2022-09-14	14:08:13	0.733906	3.26456	3.24526	118.886	FALSE	0
2022-09-14	14:08:14	0.735483	3.27158	3.26213	120.575	FALSE	0
2022-09-14	14:08:14	0.735483	3.27158	3.26213	122.158	FALSE	0
2022-09-14	14:08:14	0.73701	3.27837	3.26213	123.854	FALSE	0
2022-09-14	14:08:14	0.725458	3.22698	3.26213	125.385	FALSE	0
2022-09-14	14:08:15	0.73299	3.26049	3.26313	127.114	FALSE	0
2022-09-14	14:08:15	0.734313	3.26637	3.26313	128.651	FALSE	0
2022-09-14	14:08:15	0.733448	3.26252	3.26313	130.377	FALSE	0
2022-09-14	14:08:16	0.728308	3.23966	3.27271	131.891	FALSE	0
2022-09-14	14:08:16	0.738384	3.28448	3.27271	133.661	FALSE	0
2022-09-14	14:08:16	0.73757	3.28086	3.27271	135.172	FALSE	0
2022-09-14	14:08:16	0.738689	3.28584	3.27271	136.947	FALSE	0
2022-09-14	14:08:17	0.727036	3.234	3.25771	138.406	FALSE	0
2022-09-14	14:08:17	0.748613	3.32998	3.25771	140.277	FALSE	0
2022-09-14	14:08:17	0.725814	3.22857	3.25771	141.634	FALSE	0
2022-09-14	14:08:17	0.728003	3.2383	3.25771	143.515	FALSE	0
2022-09-14	14:08:18	0.738181	3.28358	1.13492	144.918	FALSE	0
2022-09-14	14:08:18	0.669631	2.97865	1.13492	146.494	FALSE	0
2022-09-14	14:08:18	-0.385279	-1.7138	1.13492	144.918	FALSE	0
2022-09-14	14:08:18	-0.00197174	-0.00877069	1.13492	146.494	FALSE	0
2022-09-14	14:08:19	0.711718	3.16586	3.21393	148.084	FALSE	0
2022-09-14	14:08:19	0.727494	3.23604	3.21393	149.73	FALSE	0
2022-09-14	14:08:19	0.728359	3.23989	3.21393	151.324	FALSE	0
2022-09-14	14:08:20	0.728308	3.23966	3.25692	152.97	FALSE	0
2022-09-14	14:08:20	0.735789	3.27294	3.25692	154.597	FALSE	0
2022-09-14	14:08:20	0.731005	3.25166	3.25692	156.221	FALSE	0
2022-09-14	14:08:20	0.733651	3.26343	3.25692	157.86	FALSE	0
2022-09-14	14:08:21	0.729122	3.24328	3.26824	159.464	FALSE	0
2022-09-14	14:08:21	0.736756	3.27724	3.26824	161.137	FALSE	0
2022-09-14	14:08:21	0.738028	3.2829	3.26824	162.747	FALSE	0
2022-09-14	14:08:21	0.735026	3.26954	3.26824	164.407	FALSE	0
2022-09-14	14:08:22	0.733295	3.26184	3.26603	166.009	FALSE	0
2022-09-14	14:08:22	0.729377	3.24441	3.26603	167.651	FALSE	0
2022-09-14	14:08:22	0.734059	3.26524	3.26603	169.274	FALSE	0
2022-09-14	14:08:22	0.740216	3.29263	3.26603	170.944	FALSE	0
2022-09-14	14:08:23	0.739097	3.28765	3.34937	172.562	FALSE	0
2022-09-14	14:08:23	0.757316	3.36869	3.34937	174.312	FALSE	0
2022-09-14	14:08:23	0.762506	3.39178	3.34937	175.954	FALSE	0
2022-09-14	14:08:24	0.731412	3.25347	3.25862	177.566	FALSE	0
2022-09-14	14:08:24	0.728613	3.24102	3.25862	179.195	FALSE	0
2022-09-14	14:08:24	0.735026	3.26954	3.25862	180.835	FALSE	0
2022-09-14	14:08:24	0.735229	3.27045	3.25862	182.465	FALSE	0
2022-09-14	14:08:25	0.732735	3.25935	3.25947	184.095	FALSE	0
2022-09-14	14:08:25	0.727341	3.23536	3.25947	185.701	FALSE	0
2022-09-14	14:08:25	0.735483	3.27158	3.25947	187.366	FALSE	0
2022-09-14	14:08:25	0.735483	3.27158	3.25947	188.972	FALSE	0
2022-09-14	14:08:26	0.729428	3.24464	3.02676	190.611	FALSE	0
2022-09-14	14:08:26	0.537926	2.3928	3.02676	191.365	FALSE	0
2022-09-14	14:08:26	0.725458	3.22698	3.02676	193.838	FALSE	0
2022-09-14	14:08:26	0.72897	3.2426	3.02676	194.608	FALSE	0
2022-09-14	14:08:27	0.732277	3.25731	3.25226	197.095	FALSE	0
2022-09-14	14:08:27	0.733601	3.2632	3.25226	197.871	FALSE	0
2022-09-14	14:08:27	0.727545	3.23627	3.25226	200.332	FALSE	0
2022-09-14	14:08:28	0.789987	3.51402	5.24554	201.385	FALSE	0
2022-09-14	14:08:28	2.45803	10.9338	5.24554	211.265	FALSE	0
2022-09-14	14:08:28	0.734364	3.2666	5.24554	204.651	FALSE	0
2022-09-14	14:08:28	0.734618	3.26773	5.24554	214.533	FALSE	0
2022-09-14	14:08:29	0.739402	3.28901	3.28493	207.94	FALSE	0
2022-09-14	14:08:29	0.737875	3.28222	3.28493	217.815	FALSE	0
2022-09-14	14:08:29	0.739198	3.2881	3.28493	211.229	FALSE	0
2022-09-14	14:08:29	0.737468	3.28041	3.28493	221.096	FALSE	0
2022-09-14	14:08:30	0.734873	3.26886	3.67802	214.497	FALSE	0
2022-09-14	14:08:30	0.732532	3.25845	3.67802	224.354	FALSE	0
2022-09-14	14:08:30	1.06403	4.73302	3.67802	219.23	FALSE	0
2022-09-14	14:08:30	0.775992	3.45177	3.67802	227.806	FALSE	0
2022-09-14	14:08:31	0.734568	3.26751	3.26781	222.498	FALSE	0
2022-09-14	14:08:31	0.735738	3.27271	3.26781	231.079	FALSE	0
2022-09-14	14:08:31	0.733601	3.2632	3.26781	225.761	FALSE	0
2022-09-14	14:08:32	0.730394	3.24894	3.25935	234.328	FALSE	0
2022-09-14	14:08:32	0.730852	3.25098	3.25935	229.012	FALSE	0
2022-09-14	14:08:32	0.736857	3.27769	3.25935	237.605	FALSE	0
2022-09-14	14:08:32	0.732837	3.25981	3.25935	232.272	FALSE	0
2022-09-14	14:08:33	0.731768	3.25505	3.27305	240.86	FALSE	0
2022-09-14	14:08:33	0.73187	3.2555	3.27305	235.527	FALSE	0
2022-09-14	14:08:33	0.738689	3.28584	3.27305	244.146	FALSE	0
2022-09-14	14:08:33	0.740929	3.2958	3.27305	238.823	FALSE	0
2022-09-14	14:08:34	0.736349	3.27543	3.26982	247.422	FALSE	0
2022-09-14	14:08:34	0.738028	3.2829	3.26982	242.106	FALSE	0
2022-09-14	14:08:34	0.733499	3.26275	3.26982	250.684	FALSE	0
2022-09-14	14:08:34	0.732481	3.25822	3.26982	245.364	FALSE	0
2022-09-14	14:08:35	0.728613	3.24102	3.25301	253.925	FALSE	0
2022-09-14	14:08:35	0.728664	3.24124	3.25301	248.606	FALSE	0
2022-09-14	14:08:35	0.736654	3.27678	3.25301	257.202	FALSE	0
2022-09-14	14:08:36	0.728868	3.24215	3.25471	251.848	FALSE	0
2022-09-14	14:08:36	0.730852	3.25098	3.25471	260.453	FALSE	0
2022-09-14	14:08:36	0.731463	3.25369	3.25471	255.101	FALSE	0
2022-09-14	14:08:36	0.735585	3.27203	3.25471	263.725	FALSE	0
2022-09-14	14:08:37	0.738028	3.2829	3.27739	258.384	FALSE	0
2022-09-14	14:08:37	0.739606	3.28992	3.27739	267.015	FALSE	0
2022-09-14	14:08:37	0.732735	3.25935	3.27739	261.644	FALSE	0
2022-09-14	14:08:38	0.735534	3.2718	3.2627	270.287	FALSE	0
2022-09-14	14:08:38	0.735483	3.27158	3.2627	264.915	FALSE	0
2022-09-14	14:08:38	0.732888	3.26003	3.2627	273.547	FALSE	0
2022-09-14	14:08:38	0.729936	3.2469	3.2627	268.162	FALSE	0
2022-09-14	14:08:38	0.733601	3.2632	3.2627	276.81	FALSE	0
2022-09-14	14:08:39	0.737468	3.28041	3.26758	271.443	FALSE	0
2022-09-14	14:08:39	0.73187	3.2555	3.26758	280.066	FALSE	0
2022-09-14	14:08:39	0.734415	3.26682	3.26758	274.709	FALSE	0
2022-09-14	14:08:40	0.72841	3.24011	3.25811	283.306	FALSE	0
2022-09-14	14:08:40	0.72897	3.2426	3.25811	277.952	FALSE	0
2022-09-14	14:08:40	0.736908	3.27791	3.25811	286.584	FALSE	0
2022-09-14	14:08:40	0.735534	3.2718	3.25811	281.224	FALSE	0
2022-09-14	14:08:41	0.735127	3.26999	3.26354	289.854	FALSE	0
2022-09-14	14:08:41	0.737366	3.27995	3.26354	284.504	FALSE	0
2022-09-14	14:08:41	0.73416	3.26569	3.26354	293.119	FALSE	0
2022-09-14	14:08:41	0.728054	3.23853	3.26354	287.742	FALSE	0
2022-09-14	14:08:42	0.729682	3.24577	3.23989	296.365	FALSE	0
2022-09-14	14:08:42	0.728054	3.23853	3.23989	290.981	FALSE	0
2022-09-14	14:08:42	0.726832	3.23309	3.23989	299.598	FALSE	0
2022-09-14	14:08:42	0.728868	3.24215	3.23989	294.223	FALSE	0
2022-09-14	14:08:43	0.732481	3.25822	3.25045	302.856	FALSE	0
2022-09-14	14:08:43	0.729733	3.246	3.25045	297.469	FALSE	0
2022-09-14	14:08:43	0.729987	3.24713	3.25045	306.104	FALSE	0
2022-09-14	14:08:44	0.730343	3.24871	3.25743	300.718	FALSE	0
2022-09-14	14:08:44	0.733092	3.26094	3.25743	309.364	FALSE	0
2022-09-14	14:08:44	0.734618	3.26773	3.25743	303.985	FALSE	0
2022-09-14	14:08:44	0.731158	3.25234	3.25743	312.617	FALSE	0
2022-09-14	14:08:45	0.729275	3.24396	3.24453	307.229	FALSE	0
2022-09-14	14:08:45	0.727392	3.23559	3.24453	315.852	FALSE	0
2022-09-14	14:08:45	0.729377	3.24441	3.24453	310.474	FALSE	0
2022-09-14	14:08:45	0.731565	3.25415	3.24453	319.107	FALSE	0
2022-09-14	14:08:46	0.739911	3.29127	3.26954	313.765	FALSE	0
2022-09-14	14:08:46	0.730903	3.2512	3.26954	322.358	FALSE	0
2022-09-14	14:08:46	0.735026	3.26954	3.26954	317.035	FALSE	0
2022-09-14	14:08:46	0.734262	3.26614	3.26954	325.624	FALSE	0
2022-09-14	14:08:47	0.728461	3.24034	3.24026	320.275	FALSE	0
2022-09-14	14:08:47	0.731158	3.25234	3.24026	328.876	FALSE	0
2022-09-14	14:08:47	0.725712	3.22811	3.24026	323.503	FALSE	0
2022-09-14	14:08:48	0.738231	3.2838	3.25901	332.16	FALSE	0
2022-09-14	14:08:48	0.726476	3.23151	3.25901	326.735	FALSE	0
2022-09-14	14:08:48	0.729682	3.24577	3.25901	335.406	FALSE	0
2022-09-14	14:08:48	0.736247	3.27497	3.25901	330.01	FALSE	0
2022-09-14	14:08:49	0.728155	3.23898	3.25217	338.645	FALSE	0
2022-09-14	14:08:49	0.733753	3.26388	3.25217	333.273	FALSE	0
2022-09-14	14:08:49	0.731056	3.25188	3.25217	341.897	FALSE	0
2022-09-14	14:08:49	0.731514	3.25392	3.25217	336.527	FALSE	0
2022-09-14	14:08:50	0.736043	3.27407	3.26388	345.171	FALSE	0
2022-09-14	14:08:50	0.731972	3.25596	3.26388	339.783	FALSE	0
2022-09-14	14:08:50	0.732735	3.25935	3.26388	348.43	FALSE	0
2022-09-14	14:08:50	0.734262	3.26614	3.26388	343.049	FALSE	0
2022-09-14	14:08:51	0.728766	3.2417	3.24555	351.672	FALSE	0
2022-09-14	14:08:51	0.732125	3.25664	3.24555	346.306	FALSE	0
2022-09-14	14:08:51	0.728003	3.2383	3.24555	354.91	FALSE	0
2022-09-14	14:08:52	0.73187	3.2555	3.24679	349.562	FALSE	0
2022-09-14	14:08:52	0.728359	3.23989	3.24679	358.15	FALSE	0
2022-09-14	14:08:52	0.727036	3.234	3.24679	352.796	FALSE	0
2022-09-14	14:08:52	0.732379	3.25777	3.24679	361.408	FALSE	0
2022-09-14	14:08:53	0.731768	3.25505	3.25681	356.051	FALSE	0
2022-09-14	14:08:53	0.726781	3.23287	3.25681	364.641	FALSE	0
2022-09-14	14:08:53	0.732277	3.25731	3.25681	359.308	FALSE	0
2022-09-14	14:08:53	0.737824	3.28199	3.25681	367.923	FALSE	0
2022-09-14	14:08:54	0.732939	3.26026	3.25364	362.568	FALSE	0
2022-09-14	14:08:54	0.728919	3.24238	3.25364	371.165	FALSE	0
2022-09-14	14:08:54	0.730649	3.25007	3.25364	365.818	FALSE	0
2022-09-14	14:08:54	0.733295	3.26184	3.25364	374.427	FALSE	0
2022-09-14	14:08:55	0.732125	3.25664	3.25256	369.075	FALSE	0
2022-09-14	14:08:55	0.729326	3.24419	3.25256	377.671	FALSE	0
2022-09-14	14:08:55	0.732175	3.25686	3.25256	372.332	FALSE	0
2022-09-14	14:08:56	0.7307	3.2503	3.27956	380.921	FALSE	0
2022-09-14	14:08:56	0.74444	3.31142	3.27956	375.643	FALSE	0
2022-09-14	14:08:56	0.743575	3.30757	3.27956	384.229	FALSE	0
2022-09-14	14:08:56	0.730394	3.24894	3.27956	378.892	FALSE	0
2022-09-14	14:08:57	0.692939	3.08233	2.50542	387.311	FALSE	0
2022-09-14	14:08:57	0.649275	2.88811	2.50542	381.78	FALSE	0
2022-09-14	14:08:57	0.536603	2.38692	2.50542	389.698	FALSE	0
2022-09-14	14:08:57	0.37416	1.66434	2.50542	383.445	FALSE	0
2022-09-14	14:08:58	-0.160598	-0.714372	-1.31414	389.698	FALSE	0
2022-09-14	14:08:58	-0.386653	-1.71991	-1.31414	383.445	FALSE	0
2022-09-14	14:08:58	-0.321412	-1.4297	-1.31414	389.698	FALSE	0
2022-09-14	14:08:58	-0.313066	-1.39258	-1.31414	383.445	FALSE	0
2022-09-14	14:08:59	-0.0281295	-0.125126	2.06864	389.698	FALSE	0
2022-09-14	14:08:59	0.692532	3.08052	2.06864	386.525	FALSE	0
2022-09-14	14:08:59	0.730751	3.25053	2.06864	392.949	FALSE	0
2022-09-14	14:09:00	0.684084	3.04294	2.96241	389.568	FALSE	0
2022-09-14	14:09:00	0.706679	3.14345	2.96241	396.092	FALSE	0
2022-09-14	14:09:00	0.636603	2.83174	2.96241	392.4	FALSE	0
2022-09-14	14:09:00	0.636552	2.83151	2.96241	398.924	FALSE	0
2022-09-14	14:09:01	0.732583	3.25868	2.72625	395.658	FALSE	0
2022-09-14	14:09:01	0.554059	2.46457	2.72625	401.388	FALSE	0
2022-09-14	14:09:01	0.681794	3.03276	2.72625	398.691	FALSE	0
2022-09-14	14:09:01	0.483117	2.149	2.72625	403.537	FALSE	0
2022-09-14	14:09:02	0.607901	2.70407	3.03864	401.395	FALSE	0
2022-09-14	14:09:02	0.758384	3.37344	3.03864	406.911	FALSE	0
2022-09-14	14:09:02	0.725458	3.22698	3.03864	404.622	FALSE	0
2022-09-14	14:09:02	0.640725	2.85007	3.03864	409.761	FALSE	0
2022-09-14	14:09:03	0.517163	2.30044	2.84879	406.923	FALSE	0
2022-09-14	14:09:03	0.785254	3.49297	2.84879	413.254	FALSE	0
2022-09-14	14:09:03	0.618893	2.75296	2.84879	409.676	FALSE	0
2022-09-14	14:09:04	0.54042	2.4039	2.13808	415.658	FALSE	0
2022-09-14	14:09:04	0.491921	2.18816	2.13808	411.864	FALSE	0
2022-09-14	14:09:04	0.463982	2.06388	2.13808	417.721	FALSE	0
2022-09-14	14:09:04	0.426323	1.89637	2.13808	413.76	FALSE	0
2022-09-14	14:09:05	0.433804	1.92965	1.86473	419.651	FALSE	0
2022-09-14	14:09:05	0.431361	1.91878	1.86473	415.679	FALSE	0
2022-09-14	14:09:05	0.409529	1.82167	1.86473	421.473	FALSE	0
2022-09-14	14:09:05	0.40215	1.78884	1.86473	417.468	FALSE	0
2022-09-14	14:09:06	0.395942	1.76123	1.76785	423.234	FALSE	0
2022-09-14	14:09:06	0.397214	1.76689	1.76785	419.235	FALSE	0
2022-09-14	14:09:06	0.398537	1.77277	1.76785	425.007	FALSE	0
2022-09-14	14:09:06	0.398028	1.77051	1.76785	421.005	FALSE	0
2022-09-14	14:09:07	0.391463	1.74131	1.64887	426.748	FALSE	0
2022-09-14	14:09:07	0.376858	1.67634	1.64887	422.682	FALSE	0
2022-09-14	14:09:07	0.343728	1.52897	1.64887	428.277	FALSE	0
2022-09-14	14:09:08	0.345255	1.53576	1.55546	424.217	FALSE	0
2022-09-14	14:09:08	0.353702	1.57334	1.55546	429.85	FALSE	0
2022-09-14	14:09:08	0.34383	1.52942	1.55546	425.747	FALSE	0
2022-09-14	14:09:08	0.355942	1.5833	1.55546	431.434	FALSE	0
2022-09-14	14:09:09	0.350293	1.55817	6.40841	427.305	FALSE	0
2022-09-14	14:09:09	0.368766	1.64034	6.40841	433.074	FALSE	0
2022-09-14	14:09:09	2.84719	12.6649	6.40841	439.97	FALSE	0
2022-09-14	14:09:09	2.19645	9.77025	6.40841	442.844	FALSE	0
2022-09-14	14:09:10	0.761387	3.3868	3.17509	443.357	FALSE	0
2022-09-14	14:09:10	0.706679	3.14345	3.17509	445.988	FALSE	0
2022-09-14	14:09:10	0.696247	3.09705	3.17509	446.454	FALSE	0
2022-09-14	14:09:10	0.690852	3.07305	3.17509	449.061	FALSE	0
2022-09-14	14:09:11	0.665611	2.96077	1.2574	449.414	FALSE	0
2022-09-14	14:09:11	0.637417	2.83536	1.2574	451.896	FALSE	0
2022-09-14	14:09:11	-0.455	-2.02393	1.2574	449.414	FALSE	0
2022-09-14	14:09:12	-0.561513	-2.49772	-1.255	451.896	FALSE	0
2022-09-14	14:09:12	-0.542124	-2.41148	-1.255	449.414	FALSE	0
2022-09-14	14:09:12	-0.225381	-1.00254	-1.255	451.896	FALSE	0
2022-09-14	14:09:12	0.200471	0.891735	-1.255	450.306	FALSE	0
2022-09-14	14:09:13	0.238028	1.0588	0.752402	452.955	FALSE	0
2022-09-14	14:09:13	0.195076	0.867737	0.752402	451.174	FALSE	0
2022-09-14	14:09:13	0.199097	0.885623	0.752402	453.841	FALSE	0
2022-09-14	14:09:13	0.0443895	0.197453	0.752402	451.371	FALSE	0
2022-09-14	14:09:14	0.187952	0.836048	-0.319182	454.677	FALSE	0
2022-09-14	14:09:14	-0.158613	-0.705542	-0.319182	451.371	FALSE	0
2022-09-14	14:09:14	-0.289503	-1.28777	-0.319182	454.677	FALSE	0
2022-09-14	14:09:14	-0.0268572	-0.119466	-0.319182	451.371	FALSE	0
2022-09-14	14:09:15	-0.371488	-1.65245	-2.22947	454.677	FALSE	0
2022-09-14	14:09:15	-0.562582	-2.50248	-2.22947	451.371	FALSE	0
2022-09-14	14:09:15	-0.569554	-2.53349	-2.22947	454.677	FALSE	0
2022-09-14	14:09:16	-0.480343	-2.13666	-2.13938	451.371	FALSE	0
2022-09-14	14:09:16	-0.569758	-2.5344	-2.13938	454.677	FALSE	0
2022-09-14	14:09:16	-0.436068	-1.93972	-2.13938	451.371	FALSE	0
2022-09-14	14:09:16	-0.437646	-1.94674	-2.13938	454.677	FALSE	0
2022-09-14	14:09:17	-0.275712	-1.22642	-1.0992	451.371	FALSE	0
2022-09-14	14:09:17	-0.350725	-1.56009	-1.0992	454.677	FALSE	0
2022-09-14	14:09:17	-0.242684	-1.07951	-1.0992	451.371	FALSE	0
2022-09-14	14:09:17	-0.119325	-0.530781	-1.0992	454.677	FALSE	0
2022-09-14	14:09:18	-0.213626	-0.950251	-1.0992	451.371	FALSE	0
2022-09-14	14:09:18	-0.209962	-0.933953	-1.0992	454.677	FALSE	0
2022-09-14	14:09:18	-0.200241	-0.890712	-1.0992	451.371	FALSE	0
2022-09-14	14:09:18	-0.364618	-1.62189	-1.0992	454.677	FALSE	0
2022-09-14	14:09:19	-0.482073	-2.14436	-1.94613	451.371	FALSE	0
2022-09-14	14:09:19	-0.443804	-1.97413	-1.94613	454.677	FALSE	0
2022-09-14	14:09:19	-0.386653	-1.71991	-1.94613	451.371	FALSE	0
2022-09-14	14:09:20	-0.392862	-1.74753	-0.72003	454.677	FALSE	0
2022-09-14	14:09:20	-0.300547	-1.33689	-0.72003	451.371	FALSE	0
2022-09-14	14:09:20	0.0383845	0.170742	-0.72003	454.847	FALSE	0
2022-09-14	14:09:20	0.00754479	0.0335607	-0.72003	451.405	FALSE	0
2022-09-14	14:09:21	-0.101972	-0.453592	-1.11884	454.847	FALSE	0
2022-09-14	14:09:21	-0.211895	-0.942551	-1.11884	451.405	FALSE	0
2022-09-14	14:09:21	-0.323753	-1.44012	-1.11884	454.847	FALSE	0
2022-09-14	14:09:21	-0.368486	-1.6391	-1.11884	451.405	FALSE	0
2022-09-14	14:09:22	-0.302073	-1.34368	-1.01658	454.847	FALSE	0
2022-09-14	14:09:22	-0.286501	-1.27441	-1.01658	451.405	FALSE	0
2022-09-14	14:09:22	-0.179987	-0.800618	-1.01658	454.847	FALSE	0
2022-09-14	14:09:22	-0.145585	-0.647591	-1.01658	451.405	FALSE	0
2022-09-14	14:09:23	-0.238308	-1.06004	-1.45015	454.847	FALSE	0
2022-09-14	14:09:23	-0.332811	-1.48041	-1.45015	451.405	FALSE	0
2022-09-14	14:09:23	-0.406908	-1.81001	-1.45015	454.847	FALSE	0
2022-09-14	14:09:24	-0.326246	-1.45121	-1.18449	451.405	FALSE	0
2022-09-14	14:09:24	-0.280241	-1.24657	-1.18449	454.847	FALSE	0
2022-09-14	14:09:24	-0.253422	-1.12727	-1.18449	451.405	FALSE	0
2022-09-14	14:09:24	-0.205229	-0.9129	-1.18449	454.847	FALSE	0
2022-09-14	14:09:25	-0.00207355	-0.00922357	2.24888	451.405	FALSE	0
2022-09-14	14:09:25	-0.0800379	-0.356025	2.24888	454.847	FALSE	0
2022-09-14	14:09:25	0.0642878	0.285965	2.24888	451.691	FALSE	0
2022-09-14	14:09:25	2.04011	9.07482	2.24888	463.922	FALSE	0
2022-09-14	14:09:26	2.95075	13.1255	4.81854	464.816	FALSE	0
2022-09-14	14:09:26	0.55187	2.45483	4.81854	466.377	FALSE	0
2022-09-14	14:09:26	0.458232	2.03831	4.81854	466.855	FALSE	0
2022-09-14	14:09:26	0.372176	1.65551	4.81854	468.032	FALSE	0
2022-09-14	14:09:27	0.277723	1.23537	0.663175	468.09	FALSE	0
2022-09-14	14:09:27	0.15757	0.700903	0.663175	468.733	FALSE	0
2022-09-14	14:09:27	0.0119723	0.0532552	0.663175	468.143	FALSE	0
2022-09-14	14:09:28	-0.0988165	-0.439556	2.14532	468.733	FALSE	0
2022-09-14	14:09:28	0.531565	2.36451	2.14532	470.508	FALSE	0
2022-09-14	14:09:28	0.926781	4.12251	2.14532	472.856	FALSE	0
2022-09-14	14:09:28	0.569631	2.53383	2.14532	473.042	FALSE	0
2022-09-14	14:09:29	0.600369	2.67056	2.79852	475.526	FALSE	0
2022-09-14	14:09:29	0.487748	2.1696	2.79852	475.211	FALSE	0
2022-09-14	14:09:29	0.765458	3.40491	2.79852	478.931	FALSE	0
2022-09-14	14:09:29	0.662964	2.949	2.79852	478.16	FALSE	0
2022-09-14	14:09:30	0.612277	2.72353	2.17662	481.655	FALSE	0
2022-09-14	14:09:30	0.467901	2.08132	2.17662	480.242	FALSE	0
2022-09-14	14:09:30	0.460471	2.04827	2.17662	483.703	FALSE	0
2022-09-14	14:09:30	0.416654	1.85336	2.17662	482.095	FALSE	0
2022-09-14	14:09:31	0.487137	2.16688	2.03083	485.87	FALSE	0
2022-09-14	14:09:31	0.445814	1.98307	2.03083	484.078	FALSE	0
2022-09-14	14:09:31	0.436705	1.94255	2.03083	487.813	FALSE	0
2022-09-14	14:09:32	0.390344	1.73633	1.90995	485.814	FALSE	0
2022-09-14	14:09:32	0.435127	1.93553	1.90995	489.748	FALSE	0
2022-09-14	14:09:32	0.495026	2.20197	1.90995	488.016	FALSE	0
2022-09-14	14:09:32	0.39701	1.76598	1.90995	491.514	FALSE	0
2022-09-14	14:09:33	0.371616	1.65302	1.96032	489.669	FALSE	0
2022-09-14	14:09:33	0.412227	1.83367	1.96032	493.348	FALSE	0
2022-09-14	14:09:33	0.436298	1.94074	1.96032	491.61	FALSE	0
2022-09-14	14:09:33	0.542659	2.41386	1.96032	495.762	FALSE	0
2022-09-14	14:09:34	0.575738	2.561	2.82144	494.171	FALSE	0
2022-09-14	14:09:34	0.625	2.78012	2.82144	498.542	FALSE	0
2022-09-14	14:09:34	0.661438	2.94221	2.82144	497.113	FALSE	0
2022-09-14	14:09:34	0.674974	3.00242	2.82144	501.544	FALSE	0
2022-09-14	14:09:35	0.581641	2.58726	2.32255	499.701	FALSE	0
2022-09-14	14:09:35	0.473804	2.10757	2.32255	503.652	FALSE	0
2022-09-14	14:09:35	0.510954	2.27283	2.32255	501.973	FALSE	0
2022-09-14	14:09:36	0.925356	4.11617	3.43943	507.768	FALSE	0
2022-09-14	14:09:36	0.788104	3.50564	3.43943	505.479	FALSE	0
2022-09-14	14:09:36	0.702048	3.12285	3.43943	510.891	FALSE	0
2022-09-14	14:09:36	0.677366	3.01306	3.43943	508.492	FALSE	0
2022-09-14	14:09:37	0.737112	3.27882	2.72461	514.17	FALSE	0
2022-09-14	14:09:37	0.781946	3.47825	2.72461	511.97	FALSE	0
2022-09-14	14:09:37	0.460369	2.04781	2.72461	516.217	FALSE	0
2022-09-14	14:09:37	0.470649	2.09354	2.72461	514.064	FALSE	0
2022-09-14	14:09:38	0.493957	2.19722	1.56881	518.415	FALSE	0
2022-09-14	14:09:38	0.364898	1.62314	1.56881	515.687	FALSE	0
2022-09-14	14:09:38	0.294211	1.30871	1.56881	519.723	FALSE	0
2022-09-14	14:09:38	0.257672	1.14618	1.56881	516.833	FALSE	0
2022-09-14	14:09:39	0.209733	0.932934	1.0345	520.656	FALSE	0
2022-09-14	14:09:39	0.387239	1.72252	1.0345	518.556	FALSE	0
2022-09-14	14:09:39	0.100725	0.448045	1.0345	521.104	FALSE	0
2022-09-14	14:09:40	0.263219	1.17085	1.26678	519.727	FALSE	0
2022-09-14	14:09:40	0.192023	0.854157	1.26678	521.958	FALSE	0
2022-09-14	14:09:40	0.358944	1.59665	1.26678	521.323	FALSE	0
2022-09-14	14:09:40	0.324949	1.44544	1.26678	523.404	FALSE	0
2022-09-14	14:09:41	0.638588	2.84057	2.55613	524.164	FALSE	0
2022-09-14	14:09:41	0.553397	2.46162	2.55613	525.866	FALSE	0
2022-09-14	14:09:41	0.544237	2.42088	2.55613	526.585	FALSE	0
2022-09-14	14:09:41	0.562354	2.50146	2.55613	528.367	FALSE	0
2022-09-14	14:09:42	0.425102	1.89094	1.99552	528.476	FALSE	0
2022-09-14	14:09:42	0.54388	2.41929	1.99552	530.786	FALSE	0
2022-09-14	14:09:42	0.37472	1.66683	1.99552	530.142	FALSE	0
2022-09-14	14:09:42	0.450751	2.00503	1.99552	532.791	FALSE	0
2022-09-14	14:09:43	0.434618	1.93327	1.94157	532.076	FALSE	0
2022-09-14	14:09:43	0.433601	1.92874	1.94157	534.72	FALSE	0
2022-09-14	14:09:43	0.441234	1.9627	1.94157	534.038	FALSE	0
2022-09-14	14:09:44	0.443066	1.97085	1.8357	536.691	FALSE	0
2022-09-14	14:09:44	0.408613	1.81759	1.8357	535.856	FALSE	0
2022-09-14	14:09:44	0.41014	1.82438	1.8357	538.515	FALSE	0
2022-09-14	14:09:44	0.388919	1.72999	1.8357	537.586	FALSE	0
2022-09-14	14:09:45	0.411107	1.82869	1.97883	540.344	FALSE	0
2022-09-14	14:09:45	0.39757	1.76847	1.97883	539.354	FALSE	0
2022-09-14	14:09:45	0.454008	2.01952	1.97883	542.364	FALSE	0
2022-09-14	14:09:45	0.516756	2.29863	1.97883	541.653	FALSE	0
2022-09-14	14:09:46	0.432888	1.92557	1.93559	544.289	FALSE	0
2022-09-14	14:09:46	0.425713	1.89366	1.93559	543.547	FALSE	0
2022-09-14	14:09:46	0.434211	1.93146	1.93559	546.221	FALSE	0
2022-09-14	14:09:46	0.447748	1.99167	1.93559	545.538	FALSE	0
2022-09-14	14:09:47	0.528766	2.35206	3.01141	548.573	FALSE	0
2022-09-14	14:09:47	0.315687	1.40424	3.01141	546.943	FALSE	0
2022-09-14	14:09:47	1.18653	5.27792	3.01141	553.851	FALSE	0
2022-09-14	14:09:48	2.97579	13.2369	6.86687	560.18	FALSE	0
2022-09-14	14:09:48	1.83869	8.17886	6.86687	562.029	FALSE	0
2022-09-14	14:09:48	0.735636	3.27226	6.86687	563.452	FALSE	0
2022-09-14	14:09:48	0.624847	2.77944	6.86687	564.809	FALSE	0
2022-09-14	14:09:49	0.449173	1.99801	2.44181	565.45	FALSE	0
2022-09-14	14:09:49	0.494975	2.20175	2.44181	567.011	FALSE	0
2022-09-14	14:09:49	0.598384	2.66173	2.44181	568.112	FALSE	0
2022-09-14	14:09:49	0.653244	2.90576	2.44181	569.916	FALSE	0
2022-09-14	14:09:50	0.710903	3.16224	3.23225	571.274	FALSE	0
2022-09-14	14:09:50	0.731107	3.25211	3.23225	573.168	FALSE	0
2022-09-14	14:09:50	0.730751	3.25053	3.23225	574.524	FALSE	0
2022-09-14	14:09:50	0.733804	3.26411	3.23225	576.433	FALSE	0
2022-09-14	14:09:51	0.729224	3.24373	3.25384	577.768	FALSE	0
2022-09-14	14:09:51	0.734669	3.26795	3.25384	579.7	FALSE	0
2022-09-14	14:09:51	0.730598	3.24985	3.25384	581.018	FALSE	0
2022-09-14	14:09:52	0.727392	3.23559	3.27361	582.936	FALSE	0
2022-09-14	14:09:52	0.734924	3.26909	3.27361	584.287	FALSE	0
2022-09-14	14:09:52	0.731463	3.25369	3.27361	586.19	FALSE	0
2022-09-14	14:09:52	0.749987	3.33609	3.27361	587.623	FALSE	0
2022-09-14	14:09:53	0.726476	3.23151	3.25477	589.421	FALSE	0
2022-09-14	14:09:53	0.730394	3.24894	3.25477	590.872	FALSE	0
2022-09-14	14:09:53	0.734059	3.26524	3.25477	592.687	FALSE	0
2022-09-14	14:09:53	0.735891	3.27339	3.25477	594.145	FALSE	0
2022-09-14	14:09:54	0.734059	3.26524	3.26773	595.952	FALSE	0
2022-09-14	14:09:54	0.735127	3.26999	3.26773	597.415	FALSE	0
2022-09-14	14:09:54	0.734924	3.26909	3.26773	599.221	FALSE	0
2022-09-14	14:09:54	0.734364	3.2666	3.26773	600.682	FALSE	0
2022-09-14	14:09:55	0.729631	3.24554	3.25166	602.466	FALSE	0
2022-09-14	14:09:55	0.730038	3.24736	3.25166	603.929	FALSE	0
2022-09-14	14:09:55	0.733346	3.26207	3.25166	605.728	FALSE	0
2022-09-14	14:09:56	0.736298	3.2752	0.599379	607.205	FALSE	0
2022-09-14	14:09:56	0.659148	2.93202	0.599379	608.66	FALSE	0
2022-09-14	14:09:56	-1.26833	-5.64179	0.599379	607.205	FALSE	0
2022-09-14	14:09:56	0.41187	1.83208	0.599379	610.493	FALSE	0
2022-09-14	14:09:57	-0.166399	-0.740176	0.624503	607.205	FALSE	0
2022-09-14	14:09:57	-0.746399	-3.32013	0.624503	610.493	FALSE	0
2022-09-14	14:09:57	0.737977	3.28267	0.624503	610.487	FALSE	0
2022-09-14	14:09:57	0.736399	3.27565	0.624503	613.768	FALSE	0
2022-09-14	14:09:58	0.73584	3.27316	3.29387	613.76	FALSE	0
2022-09-14	14:09:58	0.733651	3.26343	3.29387	617.032	FALSE	0
2022-09-14	14:09:58	0.731005	3.25166	3.29387	617.012	FALSE	0
2022-09-14	14:09:58	0.761488	3.38725	3.29387	620.419	FALSE	0
2022-09-14	14:09:59	0.746883	3.32228	3.26916	620.334	FALSE	0
2022-09-14	14:09:59	0.727646	3.23671	3.26916	623.656	FALSE	0
2022-09-14	14:09:59	0.730293	3.24849	3.26916	623.583	FALSE	0
2022-09-14	14:10:00	0.736399	3.27565	3.26303	626.931	FALSE	0
2022-09-14	14:10:00	0.736399	3.27565	3.26303	626.858	FALSE	0
2022-09-14	14:10:00	0.728155	3.23898	3.26303	630.17	FALSE	0
2022-09-14	14:10:00	0.733295	3.26184	3.26303	630.12	FALSE	0
2022-09-14	14:10:01	0.73299	3.26049	3.26049	633.431	FALSE	0
2022-09-14	14:10:01	0.731565	3.25415	3.26049	633.374	FALSE	0
2022-09-14	14:10:01	0.728919	3.24238	3.26049	636.673	FALSE	0
2022-09-14	14:10:01	0.738486	3.28493	3.26049	636.659	FALSE	0
2022-09-14	14:10:02	0.738995	3.2872	3.26597	639.96	FALSE	0
2022-09-14	14:10:02	0.727239	3.2349	3.26597	639.894	FALSE	0
2022-09-14	14:10:02	0.731514	3.25392	3.26597	643.214	FALSE	0
2022-09-14	14:10:02	0.739147	3.28787	3.26597	643.182	FALSE	0
2022-09-14	14:10:03	0.735076	3.26977	3.26184	646.484	FALSE	0
2022-09-14	14:10:03	0.730954	3.25143	3.26184	646.434	FALSE	0
2022-09-14	14:10:03	0.733855	3.26433	3.26184	649.748	FALSE	0
2022-09-14	14:10:04	0.728461	3.24034	3.26303	649.674	FALSE	0
2022-09-14	14:10:04	0.73355	3.26298	3.26303	653.011	FALSE	0
2022-09-14	14:10:04	0.734873	3.26886	3.26303	652.943	FALSE	0
2022-09-14	14:10:04	0.737366	3.27995	3.26303	656.291	FALSE	0
2022-09-14	14:10:05	0.729224	3.24373	3.26235	656.187	FALSE	0
2022-09-14	14:10:05	0.732125	3.25664	3.26235	659.548	FALSE	0
2022-09-14	14:10:05	0.739707	3.29036	3.26235	659.477	FALSE	0
2022-09-14	14:10:05	0.732583	3.25868	3.26235	662.807	FALSE	0
2022-09-14	14:10:06	0.72958	3.24532	3.24934	662.722	FALSE	0
2022-09-14	14:10:06	0.728613	3.24102	3.24934	666.048	FALSE	0
2022-09-14	14:10:06	0.732175	3.25686	3.24934	665.979	FALSE	0
2022-09-14	14:10:06	0.731565	3.25415	3.24934	669.302	FALSE	0
2022-09-14	14:10:07	0.726985	3.23377	3.24811	669.213	FALSE	0
2022-09-14	14:10:07	0.737519	3.28063	3.24811	672.582	FALSE	0
2022-09-14	14:10:07	0.72612	3.22993	3.24811	672.443	FALSE	0
2022-09-14	14:10:08	0.734059	3.26524	3.11363	675.848	FALSE	0
2022-09-14	14:10:08	0.734517	3.26728	3.11363	675.71	FALSE	0
2022-09-14	14:10:08	0.734822	3.26864	3.11363	679.116	FALSE	0
2022-09-14	14:10:08	0.596501	2.65336	3.11363	678.363	FALSE	0
2022-09-14	14:10:09	-0.441412	-1.96349	1.95472	679.116	FALSE	0
2022-09-14	14:10:09	0.728664	3.24124	1.95472	681.605	FALSE	0
2022-09-14	14:10:09	0.735178	3.27022	1.95472	682.386	FALSE	0
2022-09-14	14:10:09	0.735331	3.2709	1.95472	684.876	FALSE	0
2022-09-14	14:10:10	0.731209	3.25256	3.26671	685.639	FALSE	0
2022-09-14	14:10:10	0.733651	3.26343	3.26671	688.139	FALSE	0
2022-09-14	14:10:10	0.73416	3.26569	3.26671	688.905	FALSE	0
2022-09-14	14:10:10	0.738537	3.28516	3.26671	691.424	FALSE	0
2022-09-14	14:10:11	0.744236	3.31051	3.29308	692.215	FALSE	0
2022-09-14	14:10:11	0.735941	3.27361	3.29308	694.698	FALSE	0
2022-09-14	14:10:11	0.740776	3.29512	3.29308	695.51	FALSE	0
2022-09-14	14:10:12	0.73131	3.25301	3.24883	697.951	FALSE	0
2022-09-14	14:10:12	0.726679	3.23241	3.24883	698.743	FALSE	0
2022-09-14	14:10:12	0.732226	3.25709	3.24883	701.208	FALSE	0
2022-09-14	14:10:12	0.731259	3.25279	3.24883	701.996	FALSE	0
2022-09-14	14:10:13	0.732226	3.25709	2.47481	704.465	FALSE	0
2022-09-14	14:10:13	0.734059	3.26524	2.47481	705.261	FALSE	0
2022-09-14	14:10:13	0.624338	2.77718	2.47481	707.242	FALSE	0
2022-09-14	14:10:13	0.134822	0.599715	2.47481	705.861	FALSE	0
2022-09-14	14:10:14	0.172023	0.765193	0.391171	708.007	FALSE	0
2022-09-14	14:10:14	0.0171631	0.0763449	0.391171	705.937	FALSE	0
2022-09-14	14:10:14	-0.0422262	-0.187831	0.391171	708.007	FALSE	0
2022-09-14	14:10:14	0.204797	0.910978	0.391171	706.848	FALSE	0
2022-09-14	14:10:15	0.557112	2.47815	2.78073	710.485	FALSE	0
2022-09-14	14:10:15	0.586832	2.61035	2.78073	709.458	FALSE	0
2022-09-14	14:10:15	0.731463	3.25369	2.78073	713.739	FALSE	0
2022-09-14	14:10:16	0.235738	1.04861	-1.04651	710.507	FALSE	0
2022-09-14	14:10:16	-0.340445	-1.51437	-1.04651	713.739	FALSE	0
2022-09-14	14:10:16	-0.421157	-1.87339	-1.04651	710.507	FALSE	0
2022-09-14	14:10:16	-0.415203	-1.84691	-1.04651	713.739	FALSE	0
2022-09-14	14:10:17	-0.402277	-1.78941	-1.78624	710.507	FALSE	0
2022-09-14	14:10:17	-0.409045	-1.81951	-1.78624	713.739	FALSE	0
2022-09-14	14:10:17	-0.40075	-1.78262	-1.78624	710.507	FALSE	0
2022-09-14	14:10:17	-0.394185	-1.75341	-1.78624	713.739	FALSE	0
2022-09-14	14:10:18	-0.378816	-1.68505	-1.69122	710.507	FALSE	0
2022-09-14	14:10:18	-0.393117	-1.74866	-1.69122	713.739	FALSE	0
2022-09-14	14:10:18	-0.362429	-1.61216	-1.69122	710.507	FALSE	0
2022-09-14	14:10:18	-0.38645	-1.71901	-1.69122	713.739	FALSE	0
2022-09-14	14:10:19	-0.399122	-1.77537	-1.72685	710.507	FALSE	0
2022-09-14	14:10:19	-0.384669	-1.71108	-1.72685	713.739	FALSE	0
2022-09-14	14:10:19	-0.380852	-1.69411	-1.72685	710.507	FALSE	0
2022-09-14	14:10:20	-0.376374	-1.67419	-1.67532	713.739	FALSE	0
2022-09-14	14:10:20	-0.372658	-1.65766	-1.67532	710.507	FALSE	0
2022-09-14	14:10:20	-0.382073	-1.69954	-1.67532	713.739	FALSE	0
2022-09-14	14:10:20	-0.375407	-1.66989	-1.67532	710.507	FALSE	0
2022-09-14	14:10:21	-0.363956	-1.61895	-1.4666	713.739	FALSE	0
2022-09-14	14:10:21	-0.332557	-1.47928	-1.4666	710.507	FALSE	0
2022-09-14	14:10:21	-0.313371	-1.39394	-1.4666	713.739	FALSE	0
2022-09-14	14:10:21	-0.308944	-1.37424	-1.4666	710.507	FALSE	0
2022-09-14	14:10:22	-0.339224	-1.50894	-1.60429	713.739	FALSE	0
2022-09-14	14:10:22	-0.363091	-1.6151	-1.60429	710.507	FALSE	0
2022-09-14	14:10:22	-0.362226	-1.61125	-1.60429	713.739	FALSE	0
2022-09-14	14:10:22	-0.378104	-1.68188	-1.60429	710.507	FALSE	0
2022-09-14	14:10:23	-0.376933	-1.67667	-1.65887	713.739	FALSE	0
2022-09-14	14:10:23	-0.373473	-1.66128	-1.65887	710.507	FALSE	0
2022-09-14	14:10:23	-0.368384	-1.63865	-1.65887	713.739	FALSE	0
2022-09-14	14:10:24	-0.371539	-1.65268	-1.66983	710.507	FALSE	0
2022-09-14	14:10:24	-0.372048	-1.65494	-1.66983	713.739	FALSE	0
2022-09-14	14:10:24	-0.378969	-1.68573	-1.66983	710.507	FALSE	0
2022-09-14	14:10:24	-0.37902	-1.68596	-1.66983	713.739	FALSE	0
2022-09-14	14:10:25	-0.37505	-1.6683	-1.63389	710.507	FALSE	0
2022-09-14	14:10:25	-0.370623	-1.64861	-1.63389	713.739	FALSE	0
2022-09-14	14:10:25	-0.366094	-1.62846	-1.63389	710.507	FALSE	0
2022-09-14	14:10:25	-0.357493	-1.5902	-1.63389	713.739	FALSE	0
2022-09-14	14:10:26	-0.361564	-1.60831	-1.37839	710.507	FALSE	0
2022-09-14	14:10:26	-0.33673	-1.49784	-1.37839	713.739	FALSE	0
2022-09-14	14:10:26	-0.231336	-1.02903	-1.37839	710.507	FALSE	0
2022-09-14	14:10:27	-0.345839	-1.53836	-1.63712	713.739	FALSE	0
2022-09-14	14:10:27	-0.431946	-1.92138	-1.63712	710.507	FALSE	0
2022-09-14	14:10:27	-0.3779	-1.68097	-1.63712	713.739	FALSE	0
2022-09-14	14:10:27	-0.316475	-1.40774	-1.63712	710.507	FALSE	0
2022-09-14	14:10:28	-0.454134	-2.02008	-3.13383	713.739	FALSE	0
2022-09-14	14:10:28	-0.698969	-3.10915	-3.13383	710.507	FALSE	0
2022-09-14	14:10:28	-0.801615	-3.56574	-3.13383	713.739	FALSE	0
2022-09-14	14:10:28	-0.863345	-3.84033	-3.13383	710.507	FALSE	0
2022-09-14	14:10:29	-0.581513	-2.58669	-2.29512	713.739	FALSE	0
2022-09-14	14:10:29	-0.604211	-2.68765	-2.29512	710.507	FALSE	0
2022-09-14	14:10:29	-0.524872	-2.33474	-2.29512	713.739	FALSE	0
2022-09-14	14:10:29	-0.353269	-1.57141	-2.29512	710.507	FALSE	0
2022-09-14	14:10:30	-0.169402	-0.753534	-0.417598	713.739	FALSE	0
2022-09-14	14:10:30	-0.157799	-0.701922	-0.417598	710.507	FALSE	0
2022-09-14	14:10:30	-0.0606995	-0.270004	-0.417598	713.739	FALSE	0
2022-09-14	14:10:30	0.0123794	0.055066	-0.417598	710.562	FALSE	0
2022-09-14	14:10:31	-0.0291473	-0.129653	-0.0640808	713.739	FALSE	0
2022-09-14	14:10:31	-0.043702	-0.194395	-0.0640808	710.562	FALSE	0
2022-09-14	14:10:31	0.0296313	0.131806	-0.0640808	713.871	FALSE	0
2022-09-14	14:10:32	-0.0107758	-0.0479329	-0.149404	710.562	FALSE	0
2022-09-14	14:10:32	-0.03444	-0.153196	-0.149404	713.871	FALSE	0
2022-09-14	14:10:32	-0.0483331	-0.214995	-0.149404	710.562	FALSE	0
2022-09-14	14:10:32	-0.0408013	-0.181492	-0.149404	713.871	FALSE	0
2022-09-14	14:10:33	0.103575	0.460722	1.54957	711.023	FALSE	0
2022-09-14	14:10:33	0.375585	1.67068	1.54957	715.542	FALSE	0
2022-09-14	14:10:33	0.462761	2.05845	1.54957	713.081	FALSE	0
2022-09-14	14:10:33	0.451514	2.00842	1.54957	717.55	FALSE	0
2022-09-14	14:10:34	0.442252	1.96723	1.92919	715.048	FALSE	0
2022-09-14	14:10:34	0.435585	1.93757	1.92919	719.488	FALSE	0
2022-09-14	14:10:34	0.430445	1.91471	1.92919	716.963	FALSE	0
2022-09-14	14:10:34	0.426527	1.89728	1.92919	721.385	FALSE	0
2022-09-14	14:10:35	0.428308	1.9052	1.87298	718.868	FALSE	0
2022-09-14	14:10:35	0.418944	1.86355	1.87298	723.248	FALSE	0
2022-09-14	14:10:35	0.415942	1.85019	1.87298	720.718	FALSE	0
2022-09-14	14:10:36	0.410242	1.82484	1.80644	725.073	FALSE	0
2022-09-14	14:10:36	0.40673	1.80922	1.80644	722.528	FALSE	0
2022-09-14	14:10:36	0.406781	1.80944	1.80644	726.883	FALSE	0
2022-09-14	14:10:36	0.400674	1.78228	1.80644	724.31	FALSE	0
2022-09-14	14:10:37	0.401234	1.78477	1.78511	728.668	FALSE	0
2022-09-14	14:10:37	0.399148	1.77549	1.78511	726.085	FALSE	0
2022-09-14	14:10:37	0.405407	1.80333	1.78511	730.471	FALSE	0
2022-09-14	14:10:37	0.399453	1.77685	1.78511	727.862	FALSE	0
2022-09-14	14:10:38	0.396959	1.76575	1.75319	732.237	FALSE	0
2022-09-14	14:10:38	0.389886	1.73429	1.75319	729.596	FALSE	0
2022-09-14	14:10:38	0.394059	1.75285	1.75319	733.989	FALSE	0
2022-09-14	14:10:38	0.395636	1.75987	1.75319	731.356	FALSE	0
2022-09-14	14:10:39	0.386832	1.72071	1.70984	735.71	FALSE	0
2022-09-14	14:10:39	0.382914	1.70328	1.70984	733.06	FALSE	0
2022-09-14	14:10:39	0.383422	1.70554	1.70984	737.416	FALSE	0
2022-09-14	14:10:40	0.36958	1.64397	1.63005	734.704	FALSE	0
2022-09-14	14:10:40	0.369835	1.6451	1.63005	739.061	FALSE	0
2022-09-14	14:10:40	0.367188	1.63333	1.63005	736.337	FALSE	0
2022-09-14	14:10:40	0.359199	1.59779	1.63005	740.659	FALSE	0
2022-09-14	14:10:41	0.353601	1.57289	1.55438	737.91	FALSE	0
2022-09-14	14:10:41	0.350598	1.55953	1.55438	742.218	FALSE	0
2022-09-14	14:10:41	0.348053	1.54821	1.55438	739.458	FALSE	0
2022-09-14	14:10:41	0.345509	1.53689	1.55438	743.755	FALSE	0
2022-09-14	14:10:42	0.334771	1.48913	1.51561	740.947	FALSE	0
2022-09-14	14:10:42	0.340675	1.51539	1.51561	745.27	FALSE	0
2022-09-14	14:10:42	0.339809	1.51154	1.51561	742.459	FALSE	0
2022-09-14	14:10:42	0.347646	1.5464	1.51561	746.817	FALSE	0
2022-09-14	14:10:43	0.345458	1.53667	1.55063	743.995	FALSE	0
2022-09-14	14:10:43	0.347494	1.54572	1.55063	748.363	FALSE	0
2022-09-14	14:10:43	0.352837	1.56949	1.55063	745.565	FALSE	0
2022-09-14	14:10:44	0.36042	1.60322	1.64572	749.966	FALSE	0
2022-09-14	14:10:44	0.369987	1.64578	1.64572	747.211	FALSE	0
2022-09-14	14:10:44	0.371158	1.65099	1.64572	751.617	FALSE	0
2022-09-14	14:10:44	0.378333	1.6829	1.64572	748.894	FALSE	0
2022-09-14	14:10:45	0.388308	1.72727	1.7065	753.344	FALSE	0
2022-09-14	14:10:45	0.378995	1.68585	1.7065	750.579	FALSE	0
2022-09-14	14:10:45	0.387036	1.72161	1.7065	755.066	FALSE	0
2022-09-14	14:10:45	0.380216	1.69128	1.7065	752.271	FALSE	0
2022-09-14	14:10:46	0.392532	1.74606	1.73191	756.812	FALSE	0
2022-09-14	14:10:46	0.391514	1.74153	1.73191	754.012	FALSE	0
2022-09-14	14:10:46	0.388766	1.72931	1.73191	758.541	FALSE	0
2022-09-14	14:10:46	0.384593	1.71075	1.73191	755.723	FALSE	0
2022-09-14	14:10:47	0.388257	1.72704	1.69135	760.268	FALSE	0
2022-09-14	14:10:47	0.376756	1.67589	1.69135	757.399	FALSE	0
2022-09-14	14:10:47	0.375687	1.67113	1.69135	761.939	FALSE	0
2022-09-14	14:10:48	0.380064	1.6906	1.63927	759.089	FALSE	0
2022-09-14	14:10:48	0.368308	1.63831	1.63927	763.577	FALSE	0
2022-09-14	14:10:48	0.367494	1.63469	1.63927	760.724	FALSE	0
2022-09-14	14:10:48	0.358232	1.59349	1.63927	765.171	FALSE	0
2022-09-14	14:10:49	0.36444	1.6211	1.58324	762.345	FALSE	0
2022-09-14	14:10:49	0.363931	1.61884	1.58324	766.79	FALSE	0
2022-09-14	14:10:49	0.346272	1.54029	1.58324	763.885	FALSE	0
2022-09-14	14:10:49	0.349071	1.55274	1.58324	768.343	FALSE	0
2022-09-14	14:10:50	0.34271	1.52444	1.51929	765.41	FALSE	0
2022-09-14	14:10:50	0.340878	1.51629	1.51929	769.859	FALSE	0
2022-09-14	14:10:50	0.340369	1.51403	1.51929	766.924	FALSE	0
2022-09-14	14:10:50	0.342252	1.52241	1.51929	771.381	FALSE	0
2022-09-14	14:10:51	0.338079	1.50384	1.50369	768.428	FALSE	0
2022-09-14	14:10:51	0.336247	1.49569	1.50369	772.877	FALSE	0
2022-09-14	14:10:51	0.339809	1.51154	1.50369	769.939	FALSE	0
2022-09-14	14:10:52	0.342812	1.5249	1.53967	774.402	FALSE	0
2022-09-14	14:10:52	0.349631	1.55523	1.53967	771.495	FALSE	0
2022-09-14	14:10:52	0.34841	1.5498	1.53967	775.952	FALSE	0
2022-09-14	14:10:52	0.343677	1.52874	1.53967	773.023	FALSE	0
2022-09-14	14:10:53	0.349428	1.55433	1.57911	777.506	FALSE	0
2022-09-14	14:10:53	0.35299	1.57017	1.57911	774.593	FALSE	0
2022-09-14	14:10:53	0.358181	1.59326	1.57911	779.099	FALSE	0
2022-09-14	14:10:53	0.359402	1.59869	1.57911	776.192	FALSE	0
2022-09-14	14:10:54	0.352939	1.56994	1.44012	780.669	FALSE	0
2022-09-14	14:10:54	0.332227	1.47781	1.44012	777.67	FALSE	0
2022-09-14	14:10:54	0.321031	1.42801	1.44012	782.097	FALSE	0
2022-09-14	14:10:54	0.288817	1.28472	1.44012	778.955	FALSE	0
2022-09-14	14:10:55	0.274771	1.22224	1.19756	783.319	FALSE	0
2022-09-14	14:10:55	0.269631	1.19937	1.19756	780.154	FALSE	0
2022-09-14	14:10:55	0.26327	1.17108	1.19756	784.49	FALSE	0
2022-09-14	14:10:56	0.248054	1.10339	1.05008	781.257	FALSE	0
2022-09-14	14:10:56	0.23813	1.05925	1.05008	785.55	FALSE	0
2022-09-14	14:10:56	0.2307	1.0262	1.05008	782.284	FALSE	0
2022-09-14	14:10:56	0.227392	1.01149	1.05008	786.561	FALSE	0
2022-09-14	14:10:57	0.247494	1.1009	1.14335	783.385	FALSE	0
2022-09-14	14:10:57	0.264288	1.17561	1.14335	787.737	FALSE	0
2022-09-14	14:10:57	0.255433	1.13622	1.14335	784.521	FALSE	0
2022-09-14	14:10:57	0.260929	1.16066	1.14335	788.897	FALSE	0
2022-09-14	14:10:58	0.263779	1.17334	1.1627	785.694	FALSE	0
2022-09-14	14:10:58	0.256959	1.14301	1.1627	790.04	FALSE	0
2022-09-14	14:10:58	0.263677	1.17289	1.1627	786.867	FALSE	0
2022-09-14	14:10:58	0.261132	1.16157	1.1627	791.202	FALSE	0
2022-09-14	14:10:59	0.269377	1.19824	1.20986	788.065	FALSE	0
2022-09-14	14:10:59	0.271005	1.20548	1.20986	792.408	FALSE	0
2022-09-14	14:10:59	0.275585	1.22586	1.20986	789.291	FALSE	0
2022-09-14	14:11:00	0.287494	1.27883	1.30469	793.686	FALSE	0
2022-09-14	14:11:00	0.289886	1.28947	1.30469	790.581	FALSE	0
2022-09-14	14:11:00	0.293855	1.30713	1.30469	794.993	FALSE	0
2022-09-14	14:11:00	0.301998	1.34335	1.30469	791.924	FALSE	0
2022-09-14	14:11:01	0.297875	1.32501	1.35251	796.318	FALSE	0
2022-09-14	14:11:01	0.300267	1.33565	1.35251	793.26	FALSE	0
2022-09-14	14:11:01	0.313397	1.39405	1.35251	797.713	FALSE	0
2022-09-14	14:11:01	0.304695	1.35534	1.35251	794.615	FALSE	0
2022-09-14	14:11:02	0.314109	1.39722	1.40407	799.11	FALSE	0
2022-09-14	14:11:02	0.314873	1.40062	1.40407	796.016	FALSE	0
2022-09-14	14:11:02	0.316247	1.40673	1.40407	800.516	FALSE	0
2022-09-14	14:11:02	0.317366	1.41171	1.40407	797.427	FALSE	0
2022-09-14	14:11:03	0.32673	1.45336	1.43133	801.97	FALSE	0
2022-09-14	14:11:03	0.322099	1.43276	1.43133	798.86	FALSE	0
2022-09-14	14:11:03	0.316501	1.40786	1.43133	803.378	FALSE	0
2022-09-14	14:11:04	0.32098	1.42778	1.39411	800.288	FALSE	0
2022-09-14	14:11:04	0.314364	1.39835	1.39411	804.776	FALSE	0
2022-09-14	14:11:04	0.307901	1.36961	1.39411	801.657	FALSE	0
2022-09-14	14:11:04	0.310395	1.3807	1.39411	806.157	FALSE	0
2022-09-14	14:11:05	0.306272	1.36236	1.34074	803.02	FALSE	0
2022-09-14	14:11:05	0.301031	1.33905	1.34074	807.496	FALSE	0
2022-09-14	14:11:05	0.304542	1.35466	1.34074	804.374	FALSE	0
2022-09-14	14:11:05	0.293804	1.3069	1.34074	808.803	FALSE	0
2022-09-14	14:11:06	0.297265	1.32229	1.27962	805.697	FALSE	0
2022-09-14	14:11:06	0.293244	1.30441	1.27962	810.107	FALSE	0
2022-09-14	14:11:06	0.280115	1.24601	1.27962	806.943	FALSE	0
2022-09-14	14:11:06	0.280064	1.24578	1.27962	811.353	FALSE	0
2022-09-14	14:11:07	0.275076	1.22359	1.23612	808.166	FALSE	0
2022-09-14	14:11:07	0.277621	1.23491	1.23612	812.588	FALSE	0
2022-09-14	14:11:07	0.28098	1.24986	1.23612	809.416	FALSE	0
2022-09-14	14:11:08	0.280267	1.24668	1.25846	813.834	FALSE	0
2022-09-14	14:11:08	0.288766	1.28449	1.25846	810.701	FALSE	0
2022-09-14	14:11:08	0.283117	1.25936	1.25846	815.094	FALSE	0
2022-09-14	14:11:08	0.279504	1.24329	1.25846	811.944	FALSE	0
2022-09-14	14:11:09	0.274059	1.21907	1.18047	816.313	FALSE	0
2022-09-14	14:11:09	0.262048	1.16564	1.18047	813.11	FALSE	0
2022-09-14	14:11:09	0.259809	1.15568	1.18047	817.469	FALSE	0
2022-09-14	14:11:09	0.265611	1.18149	1.18047	814.291	FALSE	0
2022-09-14	14:11:10	0.259097	1.15252	1.17181	818.621	FALSE	0
2022-09-14	14:11:10	0.26383	1.17357	1.17181	815.465	FALSE	0
2022-09-14	14:11:10	0.258588	1.15025	1.17181	819.771	FALSE	0
2022-09-14	14:11:10	0.272226	1.21092	1.17181	816.676	FALSE	0
2022-09-14	14:11:11	0.282099	1.25483	1.30275	821.026	FALSE	0
2022-09-14	14:11:11	0.290598	1.29264	1.30275	817.968	FALSE	0
2022-09-14	14:11:11	0.305916	1.36078	1.30275	822.387	FALSE	0
2022-09-14	14:11:12	0.308512	1.37232	1.44589	819.341	FALSE	0
2022-09-14	14:11:12	0.319555	1.42144	1.44589	823.808	FALSE	0
2022-09-14	14:11:12	0.335789	1.49366	1.44589	820.834	FALSE	0
2022-09-14	14:11:12	0.336349	1.49615	1.44589	825.305	FALSE	0
2022-09-14	14:11:13	0.340675	1.51539	1.54278	822.35	FALSE	0
2022-09-14	14:11:13	0.341285	1.5181	1.54278	826.823	FALSE	0
2022-09-14	14:11:13	0.345814	1.53825	1.54278	823.888	FALSE	0
2022-09-14	14:11:13	0.359555	1.59937	1.54278	828.422	FALSE	0
2022-09-14	14:11:14	0.360115	1.60186	1.61307	825.49	FALSE	0
2022-09-14	14:11:14	0.364339	1.62065	1.61307	830.043	FALSE	0
2022-09-14	14:11:14	0.364339	1.62065	1.61307	827.11	FALSE	0
2022-09-14	14:11:14	0.361743	1.60911	1.61307	831.652	FALSE	0
2022-09-14	14:11:15	0.372277	1.65596	1.68162	828.766	FALSE	0
2022-09-14	14:11:15	0.380929	1.69445	1.68162	833.346	FALSE	0
2022-09-14	14:11:15	0.380929	1.69445	1.68162	830.461	FALSE	0
2022-09-14	14:11:16	0.382557	1.70169	1.75296	835.048	FALSE	0
2022-09-14	14:11:16	0.389529	1.7327	1.75296	832.193	FALSE	0
2022-09-14	14:11:16	0.395076	1.75738	1.75296	836.805	FALSE	0
2022-09-14	14:11:16	0.409173	1.82008	1.75296	834.014	FALSE	0
2022-09-14	14:11:17	0.419758	1.86717	2.00163	838.672	FALSE	0
2022-09-14	14:11:17	0.445611	1.98217	2.00163	835.996	FALSE	0
2022-09-14	14:11:17	0.460115	2.04668	2.00163	840.719	FALSE	0
2022-09-14	14:11:17	0.474466	2.11052	2.00163	838.106	FALSE	0
2022-09-14	14:11:18	0.483677	2.15149	2.23117	842.871	FALSE	0
2022-09-14	14:11:18	0.478435	2.12817	2.23117	840.234	FALSE	0
2022-09-14	14:11:18	0.532379	2.36813	2.23117	845.239	FALSE	0
2022-09-14	14:11:18	0.51187	2.2769	2.23117	842.511	FALSE	0
2022-09-14	14:11:19	0.488206	2.17164	2.05257	847.41	FALSE	0
2022-09-14	14:11:19	0.458333	2.03876	2.05257	844.55	FALSE	0
2022-09-14	14:11:19	0.437774	1.94731	2.05257	849.358	FALSE	0
2022-09-14	14:11:20	0.451972	2.01046	1.9232	846.561	FALSE	0
2022-09-14	14:11:20	0.454975	2.02382	1.9232	851.382	FALSE	0
2022-09-14	14:11:20	0.437977	1.94821	1.9232	848.509	FALSE	0
2022-09-14	14:11:20	0.384491	1.71029	1.9232	853.092	FALSE	0
2022-09-14	14:11:21	0.430089	1.91312	1.9511	850.422	FALSE	0
2022-09-14	14:11:21	0.43528	1.93621	1.9511	855.028	FALSE	0
2022-09-14	14:11:21	0.446272	1.98511	1.9511	852.407	FALSE	0
2022-09-14	14:11:21	0.442863	1.96994	1.9511	856.998	FALSE	0
2022-09-14	14:11:22	0.41243	1.83457	1.40877	854.242	FALSE	0
2022-09-14	14:11:22	0.137672	0.612393	1.40877	857.61	FALSE	0
2022-09-14	14:11:22	0.434568	1.93305	1.40877	856.175	FALSE	0
2022-09-14	14:11:22	0.28215	1.25506	1.40877	858.865	FALSE	0
2022-09-14	14:11:23	-0.221819	-0.986695	0.785945	856.175	FALSE	0
2022-09-14	14:11:23	0.365662	1.62654	0.785945	860.492	FALSE	0
2022-09-14	14:11:23	0.386222	1.71799	0.785945	857.893	FALSE	0
2022-09-14	14:11:24	0.742506	3.30282	3.27056	863.795	FALSE	0
2022-09-14	14:11:24	0.730445	3.24917	3.27056	861.142	FALSE	0
2022-09-14	14:11:24	0.729326	3.24419	3.27056	867.039	FALSE	0
2022-09-14	14:11:24	0.73874	3.28606	3.27056	864.428	FALSE	0
2022-09-14	14:11:25	0.732074	3.25641	3.26937	870.295	FALSE	0
2022-09-14	14:11:25	0.73645	3.27588	3.26937	867.704	FALSE	0
2022-09-14	14:11:25	0.734618	3.26773	3.26937	873.563	FALSE	0
2022-09-14	14:11:25	0.736807	3.27746	3.26937	870.981	FALSE	0
2022-09-14	14:11:26	0.737214	3.27928	3.28075	876.842	FALSE	0
2022-09-14	14:11:26	0.740064	3.29195	3.28075	874.273	FALSE	0
2022-09-14	14:11:26	0.738181	3.28358	3.28075	880.126	FALSE	0
2022-09-14	14:11:26	0.73472	3.26818	3.28075	877.541	FALSE	0
2022-09-14	14:11:27	0.728919	3.24238	3.25264	883.368	FALSE	0
2022-09-14	14:11:27	0.73355	3.26298	3.25264	880.804	FALSE	0
2022-09-14	14:11:27	0.731209	3.25256	3.25264	886.621	FALSE	0
2022-09-14	14:11:28	0.684491	3.04475	3.1645	883.849	FALSE	0
2022-09-14	14:11:28	0.723219	3.21702	3.1645	889.838	FALSE	0
2022-09-14	14:11:28	0.72103	3.20729	3.1645	887.056	FALSE	0
2022-09-14	14:11:28	0.716908	3.18895	3.1645	893.027	FALSE	0
2022-09-14	14:11:29	0.729987	3.24713	3.23281	890.303	FALSE	0
2022-09-14	14:11:29	0.724135	3.2211	3.23281	896.248	FALSE	0
2022-09-14	14:11:29	0.730191	3.24804	3.23281	893.551	FALSE	0
2022-09-14	14:11:29	0.722761	3.21499	3.23281	899.463	FALSE	0
2022-09-14	14:11:30	0.730293	3.24849	3.24311	896.8	FALSE	0
2022-09-14	14:11:30	0.730445	3.24917	3.24311	902.712	FALSE	0
2022-09-14	14:11:30	0.732939	3.26026	3.24311	900.06	FALSE	0
2022-09-14	14:11:30	0.722659	3.21453	3.24311	905.927	FALSE	0
2022-09-14	14:11:31	0.722608	3.2143	3.23226	903.274	FALSE	0
2022-09-14	14:11:31	0.727188	3.23468	3.23226	909.161	FALSE	0
2022-09-14	14:11:31	0.73014	3.24781	3.23226	906.522	FALSE	0
2022-09-14	14:11:32	0.727188	3.23468	3.23949	912.396	FALSE	0
2022-09-14	14:11:32	0.72841	3.24011	3.23949	909.762	FALSE	0
2022-09-14	14:11:32	0.733804	3.26411	3.23949	915.66	FALSE	0
2022-09-14	14:11:32	0.723677	3.21906	3.23949	912.981	FALSE	0
2022-09-14	14:11:33	0.73243	3.258	3.2426	918.918	FALSE	0
2022-09-14	14:11:33	0.726425	3.23128	3.2426	916.213	FALSE	0
2022-09-14	14:11:33	0.729071	3.24305	3.2426	922.161	FALSE	0
2022-09-14	14:11:33	0.727952	3.23808	3.2426	919.451	FALSE	0
2022-09-14	14:11:34	0.725153	3.22563	3.2379	925.387	FALSE	0
2022-09-14	14:11:34	0.730038	3.24736	3.2379	922.698	FALSE	0
2022-09-14	14:11:34	0.720369	3.20435	3.2379	928.591	FALSE	0
2022-09-14	14:11:34	0.736094	3.27429	3.2379	925.972	FALSE	0
2022-09-14	14:11:35	0.725509	3.22721	3.24743	931.818	FALSE	0
2022-09-14	14:11:35	0.730954	3.25143	3.24743	929.224	FALSE	0
2022-09-14	14:11:35	0.733702	3.26365	3.24743	935.082	FALSE	0
2022-09-14	14:11:36	0.723982	3.22042	3.23864	932.444	FALSE	0
2022-09-14	14:11:36	0.729071	3.24305	3.23864	938.325	FALSE	0
2022-09-14	14:11:36	0.728613	3.24102	3.23864	935.685	FALSE	0
2022-09-14	14:11:36	0.730649	3.25007	3.23864	941.575	FALSE	0
2022-09-14	14:11:37	0.726883	3.23332	3.24181	938.919	FALSE	0
2022-09-14	14:11:37	0.731667	3.2546	3.24181	944.83	FALSE	0
2022-09-14	14:11:37	0.725763	3.22834	3.24181	942.147	FALSE	0
2022-09-14	14:11:37	0.730852	3.25098	3.24181	948.081	FALSE	0
2022-09-14	14:11:38	0.508054	2.25993	2.78375	944.407	FALSE	0
2022-09-14	14:11:38	0.574924	2.55738	2.78375	950.638	FALSE	0
2022-09-14	14:11:38	0.686018	3.05155	2.78375	947.458	FALSE	0
2022-09-14	14:11:38	0.734262	3.26614	2.78375	953.904	FALSE	0
2022-09-14	14:11:39	0.732125	3.25664	3.27754	950.715	FALSE	0
2022-09-14	14:11:39	0.740573	3.29422	3.27754	957.198	FALSE	0
2022-09-14	14:11:39	0.737773	3.28176	3.27754	953.997	FALSE	0
2022-09-14	14:11:40	0.731209	3.25256	3.26145	960.451	FALSE	0
2022-09-14	14:11:40	0.737315	3.27972	3.26145	957.277	FALSE	0
2022-09-14	14:11:40	0.737926	3.28244	3.26145	963.733	FALSE	0
2022-09-14	14:11:40	0.726374	3.23106	3.26145	960.508	FALSE	0
2022-09-14	14:11:41	0.734415	3.26682	3.25534	967	FALSE	0
2022-09-14	14:11:41	0.73243	3.258	3.25534	963.766	FALSE	0
2022-09-14	14:11:41	0.732023	3.25618	3.25534	970.256	FALSE	0
2022-09-14	14:11:41	0.728461	3.24034	3.25534	967.006	FALSE	0
2022-09-14	14:11:42	0.731005	3.25166	3.2447	973.508	FALSE	0
2022-09-14	14:11:42	0.726679	3.23241	3.2447	970.238	FALSE	0
2022-09-14	14:11:42	0.725712	3.22811	3.2447	976.736	FALSE	0
2022-09-14	14:11:42	0.734364	3.2666	3.2447	973.505	FALSE	0
2022-09-14	14:11:43	0.736908	3.27791	3.26833	980.014	FALSE	0
2022-09-14	14:11:43	0.735941	3.27361	3.26833	976.779	FALSE	0
2022-09-14	14:11:43	0.731412	3.25347	3.26833	983.268	FALSE	0
2022-09-14	14:11:44	0.732175	3.25686	3.26043	980.035	FALSE	0
2022-09-14	14:11:44	0.732328	3.25754	3.26043	986.525	FALSE	0
2022-09-14	14:11:44	0.734517	3.26728	3.26043	983.303	FALSE	0
2022-09-14	14:11:44	0.732888	3.26003	3.26043	989.785	FALSE	0
2022-09-14	14:11:45	0.737417	3.28018	3.26184	986.583	FALSE	0
2022-09-14	14:11:45	0.725305	3.2263	3.26184	993.012	FALSE	0
2022-09-14	14:11:45	0.736552	3.27633	3.26184	989.859	FALSE	0
2022-09-14	14:11:45	0.733906	3.26456	3.26184	996.276	FALSE	0
2022-09-14	14:11:46	0.734568	3.26751	3.26003	993.127	FALSE	0
2022-09-14	14:11:46	0.732583	3.25868	3.26003	999.535	FALSE	0
2022-09-14	14:11:46	0.729936	3.2469	3.26003	996.374	FALSE	0
2022-09-14	14:11:46	0.734466	3.26705	3.26003	1002.8	FALSE	0
2022-09-14	14:11:47	0.732939	3.26026	3.26358	999.634	FALSE	0
2022-09-14	14:11:47	0.733601	3.2632	3.26358	1006.07	FALSE	0
2022-09-14	14:11:47	0.734517	3.26728	3.26358	1002.9	FALSE	0
2022-09-14	14:11:48	0.734771	3.26841	3.25239	1009.33	FALSE	0
2022-09-14	14:11:48	0.729428	3.24464	3.25239	1006.15	FALSE	0
2022-09-14	14:11:48	0.72556	3.22744	3.25239	1012.56	FALSE	0
2022-09-14	14:11:48	0.734924	3.26909	3.25239	1009.41	FALSE	0
2022-09-14	14:11:49	0.730089	3.24758	3.25941	1015.81	FALSE	0
2022-09-14	14:11:49	0.73416	3.26569	3.25941	1012.68	FALSE	0
2022-09-14	14:11:49	0.734313	3.26637	3.25941	1019.07	FALSE	0
2022-09-14	14:11:49	0.73243	3.258	3.25941	1015.94	FALSE	0
2022-09-14	14:11:50	0.7307	3.2503	3.2679	1022.33	FALSE	0
2022-09-14	14:11:50	0.740318	3.29308	3.2679	1019.23	FALSE	0
2022-09-14	14:11:50	0.733957	3.26479	3.2679	1025.59	FALSE	0
2022-09-14	14:11:50	0.733651	3.26343	3.2679	1022.5	FALSE	0
2022-09-14	14:11:51	0.73299	3.26049	3.26471	1028.85	FALSE	0
2022-09-14	14:11:51	0.732481	3.25822	3.26471	1025.75	FALSE	0
2022-09-14	14:11:51	0.736349	3.27543	3.26471	1032.13	FALSE	0
2022-09-14	14:11:52	0.735026	3.26954	3.26716	1029.02	FALSE	0
2022-09-14	14:11:52	0.732277	3.25731	3.26716	1035.38	FALSE	0
2022-09-14	14:11:52	0.733601	3.2632	3.26716	1032.29	FALSE	0
2022-09-14	14:11:52	0.737061	3.27859	3.26716	1038.66	FALSE	0
2022-09-14	14:11:53	0.736349	3.27543	3.26615	1035.56	FALSE	0
2022-09-14	14:11:53	0.739046	3.28742	3.26615	1041.95	FALSE	0
2022-09-14	14:11:53	0.723372	3.2177	3.26615	1038.78	FALSE	0
2022-09-14	14:11:53	0.738282	3.28403	3.26615	1045.23	FALSE	0
2022-09-14	14:11:54	0.727952	3.23808	3.25013	1042.02	FALSE	0
2022-09-14	14:11:54	0.727646	3.23671	3.25013	1048.47	FALSE	0
2022-09-14	14:11:54	0.732328	3.25754	3.25013	1045.27	FALSE	0
2022-09-14	14:11:54	0.73472	3.26818	3.25013	1051.74	FALSE	0
2022-09-14	14:11:55	0.729224	3.24373	3.25724	1048.52	FALSE	0
2022-09-14	14:11:55	0.731819	3.25528	3.25724	1054.99	FALSE	0
2022-09-14	14:11:55	0.735738	3.27271	3.25724	1051.79	FALSE	0
2022-09-14	14:11:56	0.726934	3.23355	3.25143	1058.23	FALSE	0
2022-09-14	14:11:56	0.731412	3.25347	3.25143	1055.04	FALSE	0
2022-09-14	14:11:56	0.732277	3.25731	3.25143	1061.48	FALSE	0
2022-09-14	14:11:56	0.733193	3.26139	3.25143	1058.31	FALSE	0
2022-09-14	14:11:57	0.737621	3.28109	3.26377	1064.77	FALSE	0
2022-09-14	14:11:57	0.73528	3.27067	3.26377	1061.58	FALSE	0
2022-09-14	14:11:57	0.729886	3.24668	3.26377	1068.01	FALSE	0
2022-09-14	14:11:57	0.732125	3.25664	3.26377	1064.83	FALSE	0
2022-09-14	14:11:58	0.734517	3.26728	3.25652	1071.28	FALSE	0
2022-09-14	14:11:58	0.733499	3.26275	3.25652	1068.1	FALSE	0
2022-09-14	14:11:58	0.727901	3.23785	3.25652	1074.52	FALSE	0
2022-09-14	14:11:58	0.732481	3.25822	3.25652	1071.35	FALSE	0
2022-09-14	14:11:59	0.729631	3.24554	3.2586	1077.76	FALSE	0
2022-09-14	14:11:59	0.737672	3.28131	3.2586	1074.64	FALSE	0
2022-09-14	14:11:59	0.730394	3.24894	3.2586	1081.01	FALSE	0
2022-09-14	14:12:00	0.735738	3.27271	3.25822	1077.91	FALSE	0
2022-09-14	14:12:00	0.726425	3.23128	3.25822	1084.24	FALSE	0
2022-09-14	14:12:00	0.732837	3.25981	3.25822	1081.17	FALSE	0
2022-09-14	14:12:00	0.734924	3.26909	3.25822	1087.51	FALSE	0
2022-09-14	14:12:01	0.728613	3.24102	3.25217	1084.41	FALSE	0
2022-09-14	14:12:01	0.734466	3.26705	3.25217	1090.78	FALSE	0
2022-09-14	14:12:01	0.72958	3.24532	3.25217	1087.65	FALSE	0
2022-09-14	14:12:01	0.731819	3.25528	3.25217	1094.03	FALSE	0
2022-09-14	14:12:02	0.731616	3.25437	3.26343	1090.91	FALSE	0
2022-09-14	14:12:02	0.736298	3.2752	3.26343	1097.31	FALSE	0
2022-09-14	14:12:02	0.728919	3.24238	3.26343	1094.15	FALSE	0
2022-09-14	14:12:02	0.737773	3.28176	3.26343	1100.59	FALSE	0
2022-09-14	14:12:03	0.730191	3.24804	3.24962	1097.4	FALSE	0
2022-09-14	14:12:03	0.730751	3.25053	3.24962	1103.84	FALSE	0
2022-09-14	14:12:03	0.7307	3.2503	3.24962	1100.65	FALSE	0
2022-09-14	14:12:04	0.735992	3.27384	3.27661	1107.12	FALSE	0
2022-09-14	14:12:04	0.7393	3.28855	3.27661	1103.94	FALSE	0
2022-09-14	14:12:04	0.734313	3.26637	3.27661	1110.38	FALSE	0
2022-09-14	14:12:04	0.736857	3.27769	3.27661	1107.22	FALSE	0
2022-09-14	14:12:05	0.732634	3.2589	3.24662	1113.64	FALSE	0
2022-09-14	14:12:05	0.734211	3.26592	3.24662	1110.48	FALSE	0
2022-09-14	14:12:05	0.723422	3.21793	3.24662	1116.86	FALSE	0
2022-09-14	14:12:05	0.729224	3.24373	3.24662	1113.73	FALSE	0
2022-09-14	14:12:06	0.732684	3.25912	3.2739	1120.12	FALSE	0
2022-09-14	14:12:06	0.736552	3.27633	3.2739	1117	FALSE	0
2022-09-14	14:12:06	0.735738	3.27271	3.2739	1123.39	FALSE	0
2022-09-14	14:12:06	0.739046	3.28742	3.2739	1120.29	FALSE	0
2022-09-14	14:12:07	0.738486	3.28493	3.25935	1126.68	FALSE	0
2022-09-14	14:12:07	0.72383	3.21974	3.25935	1123.51	FALSE	0
2022-09-14	14:12:07	0.735891	3.27339	3.25935	1129.95	FALSE	0
2022-09-14	14:12:08	0.732226	3.25709	2.46405	1126.77	FALSE	0
2022-09-14	14:12:08	0.588511	2.61781	2.46405	1132.57	FALSE	0
2022-09-14	14:12:08	0.448053	1.99303	2.46405	1128.76	FALSE	0
2022-09-14	14:12:08	0.446985	1.98828	2.46405	1134.56	FALSE	0
2022-09-14	14:12:09	0.228359	1.01579	2.23751	1129.77	FALSE	0
2022-09-14	14:12:09	0.313295	1.3936	2.23751	1135.95	FALSE	0
2022-09-14	14:12:09	0.737926	3.28244	2.23751	1133.06	FALSE	0
2022-09-14	14:12:09	0.732481	3.25822	2.23751	1139.21	FALSE	0
2022-09-14	14:12:10	0.734262	3.26614	2.95596	1136.32	FALSE	0
2022-09-14	14:12:10	0.731463	3.25369	2.95596	1142.46	FALSE	0
2022-09-14	14:12:10	0.622913	2.77084	2.95596	1139.09	FALSE	0
2022-09-14	14:12:10	0.569479	2.53316	2.95596	1144.99	FALSE	0
2022-09-14	14:12:11	0.563931	2.50848	1.97726	1141.6	FALSE	0
2022-09-14	14:12:11	0.412786	1.83615	1.97726	1146.83	FALSE	0
2022-09-14	14:12:11	0.356807	1.58715	1.97726	1143.19	FALSE	0
2022-09-14	14:12:12	0.199708	0.888341	0.9262	1147.72	FALSE	0
2022-09-14	14:12:12	0.204644	0.910297	0.9262	1144.1	FALSE	0
2022-09-14	14:12:12	0.215585	0.958965	0.9262	1148.68	FALSE	0
2022-09-14	14:12:12	0.212939	0.947195	0.9262	1145.05	FALSE	0
2022-09-14	14:12:13	0.215178	0.957155	2.47266	1149.63	FALSE	0
2022-09-14	14:12:13	0.534771	2.37877	2.47266	1147.43	FALSE	0
2022-09-14	14:12:13	0.739046	3.28742	2.47266	1152.92	FALSE	0
2022-09-14	14:12:13	0.734517	3.26728	2.47266	1150.69	FALSE	0
2022-09-14	14:12:14	0.737672	3.28131	3.26914	1156.2	FALSE	0
2022-09-14	14:12:14	0.733702	3.26365	3.26914	1153.96	FALSE	0
2022-09-14	14:12:14	0.734313	3.26637	3.26914	1159.47	FALSE	0
2022-09-14	14:12:14	0.734059	3.26524	3.26914	1157.22	FALSE	0
2022-09-14	14:12:15	0.730496	3.24939	3.2546	1162.72	FALSE	0
2022-09-14	14:12:15	0.731717	3.25482	3.2546	1160.48	FALSE	0
2022-09-14	14:12:15	0.732786	3.25958	3.2546	1165.98	FALSE	0
2022-09-14	14:12:16	0.728359	3.23989	3.25579	1163.72	FALSE	0
2022-09-14	14:12:16	0.736298	3.2752	3.25579	1169.25	FALSE	0
2022-09-14	14:12:16	0.729377	3.24441	3.25579	1166.96	FALSE	0
2022-09-14	14:12:16	0.733702	3.26365	3.25579	1172.52	FALSE	0
2022-09-14	14:12:17	0.731412	3.25347	3.25573	1170.22	FALSE	0
2022-09-14	14:12:17	0.732837	3.25981	3.25573	1175.78	FALSE	0
2022-09-14	14:12:17	0.733295	3.26184	3.25573	1173.48	FALSE	0
2022-09-14	14:12:17	0.73014	3.24781	3.25573	1179.02	FALSE	0
2022-09-14	14:12:18	0.734262	3.26614	3.25879	1176.74	FALSE	0
2022-09-14	14:12:18	0.730598	3.24985	3.25879	1182.27	FALSE	0
2022-09-14	14:12:18	0.729784	3.24623	3.25879	1179.99	FALSE	0
2022-09-14	14:12:18	0.735789	3.27294	3.25879	1185.55	FALSE	0
2022-09-14	14:12:19	0.731209	3.25256	3.25732	1183.24	FALSE	0
2022-09-14	14:12:19	0.73528	3.27067	3.25732	1188.82	FALSE	0
2022-09-14	14:12:19	0.730343	3.24871	3.25732	1186.49	FALSE	0
2022-09-14	14:12:20	0.735178	3.27022	3.2589	1192.09	FALSE	0
2022-09-14	14:12:20	0.733957	3.26479	3.2589	1189.76	FALSE	0
2022-09-14	14:12:20	0.725865	3.22879	3.2589	1195.32	FALSE	0
2022-09-14	14:12:20	0.735534	3.2718	3.2589	1193.03	FALSE	0
2022-09-14	14:12:21	0.733702	3.26365	3.25935	1198.58	FALSE	0
2022-09-14	14:12:21	0.734517	3.26728	3.25935	1196.29	FALSE	0
2022-09-14	14:12:21	0.726374	3.23106	3.25935	1201.81	FALSE	0
2022-09-14	14:12:21	0.736349	3.27543	3.25935	1199.57	FALSE	0
2022-09-14	14:12:22	0.735076	3.26977	3.2576	1205.08	FALSE	0
2022-09-14	14:12:22	0.730242	3.24826	3.2576	1202.82	FALSE	0
2022-09-14	14:12:22	0.731819	3.25528	3.2576	1208.34	FALSE	0
2022-09-14	14:12:22	0.732226	3.25709	3.2576	1206.08	FALSE	0
2022-09-14	14:12:23	0.73472	3.26818	3.25935	1211.61	FALSE	0
2022-09-14	14:12:23	0.731565	3.25415	3.25935	1209.33	FALSE	0
2022-09-14	14:12:23	0.731921	3.25573	3.25935	1214.86	FALSE	0
2022-09-14	14:12:24	0.741387	3.29784	3.17113	1212.63	FALSE	0
2022-09-14	14:12:24	0.732532	3.25845	3.17113	1218.12	FALSE	0
2022-09-14	14:12:24	0.743219	3.30599	3.17113	1215.93	FALSE	0
2022-09-14	14:12:24	0.634466	2.82223	3.17113	1220.94	FALSE	0
2022-09-14	14:12:25	0.732074	3.25641	3.2559	1219.19	FALSE	0
2022-09-14	14:12:25	0.736959	3.27814	3.2559	1224.22	FALSE	0
2022-09-14	14:12:25	0.73131	3.25301	3.2559	1222.44	FALSE	0
2022-09-14	14:12:25	0.727494	3.23604	3.2559	1227.46	FALSE	0
2022-09-14	14:12:26	0.735076	3.26977	3.40338	1225.71	FALSE	0
2022-09-14	14:12:26	0.725916	3.22902	3.40338	1230.68	FALSE	0
2022-09-14	14:12:26	0.711616	3.16541	3.40338	1228.88	FALSE	0
2022-09-14	14:12:26	0.88785	3.94933	3.40338	1234.63	FALSE	0
2022-09-14	14:12:27	-0.170572	-0.758738	2.4832	1228.88	FALSE	0
2022-09-14	14:12:27	0.74042	3.29354	2.4832	1237.93	FALSE	0
2022-09-14	14:12:27	1.1049	4.91482	2.4832	1233.79	FALSE	0
2022-09-14	14:12:28	0.289071	1.28585	0.93384	1239.21	FALSE	0
2022-09-14	14:12:28	0.0807254	0.359083	0.93384	1234.15	FALSE	0
2022-09-14	14:12:28	0.358588	1.59507	0.93384	1240.81	FALSE	0
2022-09-14	14:12:28	0.111362	0.49536	0.93384	1234.65	FALSE	0
2022-09-14	14:12:29	0.302557	1.34583	2.77916	1242.15	FALSE	0
2022-09-14	14:12:29	0.739249	3.28833	2.77916	1237.94	FALSE	0
2022-09-14	14:12:29	0.7307	3.2503	2.77916	1245.4	FALSE	0
2022-09-14	14:12:29	0.726629	3.23219	2.77916	1241.17	FALSE	0
2022-09-14	14:12:30	0.724644	3.22336	3.26598	1248.63	FALSE	0
2022-09-14	14:12:30	0.737417	3.28018	3.26598	1244.45	FALSE	0
2022-09-14	14:12:30	0.74098	3.29603	3.26598	1251.92	FALSE	0
2022-09-14	14:12:30	0.733855	3.26433	3.26598	1247.71	FALSE	0
2022-09-14	14:12:31	0.741947	3.30033	3.27746	1255.22	FALSE	0
2022-09-14	14:12:31	0.733397	3.2623	3.27746	1250.97	FALSE	0
2022-09-14	14:12:31	0.735076	3.26977	3.27746	1258.49	FALSE	0
2022-09-14	14:12:32	0.729682	3.24577	3.25335	1254.22	FALSE	0
2022-09-14	14:12:32	0.728104	3.23875	3.25335	1261.73	FALSE	0
2022-09-14	14:12:32	0.735382	3.27113	3.25335	1257.49	FALSE	0
2022-09-14	14:12:32	0.732379	3.25777	3.25335	1264.99	FALSE	0
2022-09-14	14:12:33	0.73528	3.27067	3.21346	1260.76	FALSE	0
2022-09-14	14:12:33	0.675432	3.00446	3.21346	1268	FALSE	0
2022-09-14	14:12:33	0.73874	3.28606	3.21346	1264.05	FALSE	0
2022-09-14	14:12:33	0.740216	3.29263	3.21346	1271.29	FALSE	0
2022-09-14	14:12:34	0.736552	3.27633	3.25596	1267.32	FALSE	0
2022-09-14	14:12:34	0.738079	3.28312	3.25596	1274.57	FALSE	0
2022-09-14	14:12:34	0.726221	3.23038	3.25596	1270.55	FALSE	0
2022-09-14	14:12:34	0.727036	3.234	3.25596	1277.81	FALSE	0
2022-09-14	14:12:35	0.732888	3.26003	3.26486	1273.81	FALSE	0
2022-09-14	14:12:35	0.738537	3.28516	3.26486	1281.09	FALSE	0
2022-09-14	14:12:35	0.730496	3.24939	3.26486	1277.06	FALSE	0
2022-09-14	14:12:36	0.435076	1.93531	2.93496	1283.03	FALSE	0
2022-09-14	14:12:36	0.733448	3.26252	2.93496	1280.33	FALSE	0
2022-09-14	14:12:36	0.731972	3.25596	2.93496	1286.28	FALSE	0
2022-09-14	14:12:36	0.73874	3.28606	2.93496	1283.61	FALSE	0
2022-09-14	14:12:37	0.728562	3.24079	3.30304	1289.52	FALSE	0
2022-09-14	14:12:37	0.729529	3.24509	3.30304	1286.86	FALSE	0
2022-09-14	14:12:37	0.781845	3.4778	3.30304	1293	FALSE	0
2022-09-14	14:12:37	0.730293	3.24849	3.30304	1290.11	FALSE	0
2022-09-14	14:12:38	0.731514	3.25392	3.25635	1296.25	FALSE	0
2022-09-14	14:12:38	0.730852	3.25098	3.25635	1293.36	FALSE	0
2022-09-14	14:12:38	0.732684	3.25912	3.25635	1299.51	FALSE	0
2022-09-14	14:12:38	0.733193	3.26139	3.25635	1296.62	FALSE	0
2022-09-14	14:12:39	0.730242	3.24826	3.2383	1302.76	FALSE	0
2022-09-14	14:12:39	0.727646	3.23671	3.2383	1299.86	FALSE	0
2022-09-14	14:12:39	0.72612	3.22993	3.2383	1305.99	FALSE	0
2022-09-14	14:12:40	0.729122	3.24328	3.24481	1303.1	FALSE	0
2022-09-14	14:12:40	0.734415	3.26682	3.24481	1309.26	FALSE	0
2022-09-14	14:12:40	0.71645	3.18691	3.24481	1306.29	FALSE	0
2022-09-14	14:12:40	0.737875	3.28222	3.24481	1312.54	FALSE	0
2022-09-14	14:12:41	0.731819	3.25528	3.25403	1309.54	FALSE	0
2022-09-14	14:12:41	0.731209	3.25256	3.25403	1315.79	FALSE	0
2022-09-14	14:12:41	0.730852	3.25098	3.25403	1312.79	FALSE	0
2022-09-14	14:12:41	0.732277	3.25731	3.25403	1319.05	FALSE	0
2022-09-14	14:12:42	0.731921	3.25573	3.25947	1316.05	FALSE	0
2022-09-14	14:12:42	0.730598	3.24985	3.25947	1322.3	FALSE	0
2022-09-14	14:12:42	0.732634	3.2589	3.25947	1319.31	FALSE	0
2022-09-14	14:12:42	0.735891	3.27339	3.25947	1325.57	FALSE	0
2022-09-14	14:12:43	0.734008	3.26501	3.27052	1322.57	FALSE	0
2022-09-14	14:12:43	0.734415	3.26682	3.27052	1328.84	FALSE	0
2022-09-14	14:12:43	0.737315	3.27972	3.27052	1325.85	FALSE	0
2022-09-14	14:12:44	0.710496	3.16043	3.12132	1332	FALSE	0
2022-09-14	14:12:44	0.727392	3.23559	3.12132	1329.09	FALSE	0
2022-09-14	14:12:44	0.688919	3.06445	3.12132	1335.07	FALSE	0
2022-09-14	14:12:44	0.680013	3.02483	3.12132	1332.11	FALSE	0
2022-09-14	14:12:45	0.683575	3.04068	3.04854	1338.11	FALSE	0
2022-09-14	14:12:45	0.688359	3.06196	3.04854	1335.17	FALSE	0
2022-09-14	14:12:45	0.679962	3.02461	3.04854	1341.13	FALSE	0
2022-09-14	14:12:45	0.689478	3.06694	3.04854	1338.24	FALSE	0
2022-09-14	14:12:46	0.700776	3.11719	3.16948	1344.25	FALSE	0
2022-09-14	14:12:46	0.687443	3.05788	3.16948	1341.3	FALSE	0
2022-09-14	14:12:46	0.729936	3.2469	3.16948	1347.49	FALSE	0
2022-09-14	14:12:46	0.731972	3.25596	3.16948	1344.55	FALSE	0
2022-09-14	14:12:47	0.723626	3.21883	3.25256	1350.71	FALSE	0
2022-09-14	14:12:47	0.729936	3.2469	3.25256	1347.8	FALSE	0
2022-09-14	14:12:47	0.740064	3.29195	3.25256	1354.01	FALSE	0
2022-09-14	14:12:48	0.734975	3.26932	3.25998	1351.07	FALSE	0
2022-09-14	14:12:48	0.735229	3.27045	3.25998	1357.28	FALSE	0
2022-09-14	14:12:48	0.734008	3.26501	3.25998	1354.34	FALSE	0
2022-09-14	14:12:48	0.72729	3.23513	3.25998	1360.51	FALSE	0
2022-09-14	14:12:49	0.731717	3.25482	3.23106	1357.59	FALSE	0
2022-09-14	14:12:49	0.70729	3.14617	3.23106	1363.66	FALSE	0
2022-09-14	14:12:49	0.731259	3.25279	3.23106	1360.84	FALSE	0
2022-09-14	14:12:49	0.735229	3.27045	3.23106	1366.93	FALSE	0
2022-09-14	14:12:50	0.728664	3.24124	3.24543	1364.08	FALSE	0
2022-09-14	14:12:50	0.729936	3.2469	3.24543	1370.17	FALSE	0
2022-09-14	14:12:50	0.732837	3.25981	3.24543	1367.34	FALSE	0
2022-09-14	14:12:50	0.726985	3.23377	3.24543	1373.41	FALSE	0
2022-09-14	14:12:51	0.736603	3.27656	3.25015	1370.62	FALSE	0
2022-09-14	14:12:51	0.726527	3.23174	3.25015	1376.64	FALSE	0
2022-09-14	14:12:51	0.728868	3.24215	3.25015	1373.86	FALSE	0
2022-09-14	14:12:52	0.730496	3.24939	3.25205	1379.89	FALSE	0
2022-09-14	14:12:52	0.733142	3.26116	3.25205	1377.12	FALSE	0
2022-09-14	14:12:52	0.730089	3.24758	3.25205	1383.14	FALSE	0
2022-09-14	14:12:52	0.730649	3.25007	3.25205	1380.37	FALSE	0
2022-09-14	14:12:53	0.729224	3.24373	3.25466	1386.38	FALSE	0
2022-09-14	14:12:53	0.730343	3.24871	3.25466	1383.62	FALSE	0
2022-09-14	14:12:53	0.734109	3.26546	3.25466	1389.65	FALSE	0
2022-09-14	14:12:53	0.733041	3.26071	3.25466	1386.88	FALSE	0
2022-09-14	14:12:54	0.733702	3.26365	3.26167	1392.91	FALSE	0
2022-09-14	14:12:54	0.733651	3.26343	3.26167	1390.15	FALSE	0
2022-09-14	14:12:54	0.734364	3.2666	3.26167	1396.18	FALSE	0
2022-09-14	14:12:54	0.73131	3.25301	3.26167	1393.4	FALSE	0
2022-09-14	14:12:55	0.733092	3.26094	3.26758	1399.44	FALSE	0
2022-09-14	14:12:55	0.737519	3.28063	3.26758	1396.68	FALSE	0
2022-09-14	14:12:55	0.733142	3.26116	3.26758	1402.7	FALSE	0

## Sheet: Ursula_prong_202291414738 (3)
Date	Time	Lbs	Newtons	Total force x time		total steps > 13.345	**GoPro Fitting: 13:56
2022-09-14	14:07:55	0.736145	3.27452	3.27452	FALSE	0
2022-09-14	14:07:55	0.731514	3.25392	3.25392	FALSE	0
2022-09-14	14:07:55	0.741336	3.29761	6.57213	FALSE	0
2022-09-14	14:07:56	0.73355	3.26298	6.5169	FALSE	0
2022-09-14	14:07:56	0.730191	3.24804	9.82017	FALSE	0
2022-09-14	14:07:56	0.733855	3.26433	9.78123	FALSE	0
2022-09-14	14:07:56	0.735127	3.26999	13.0902	FALSE	0
2022-09-14	14:07:57	0.734262	3.26614	13.0474	FALSE	0
2022-09-14	14:07:57	0.733753	3.26388	16.354	FALSE	0
2022-09-14	14:07:57	0.736603	3.27656	16.3239	FALSE	0
2022-09-14	14:07:57	0.726679	3.23241	19.5865	FALSE	0
2022-09-14	14:07:58	0.737061	3.27859	19.6025	FALSE	0
2022-09-14	14:07:58	0.724084	3.22087	22.8073	FALSE	0
2022-09-14	14:07:58	0.733295	3.26184	22.8644	FALSE	0
2022-09-14	14:07:58	0.736196	3.27475	26.0821	FALSE	0
2022-09-14	14:07:59	0.856857	3.81147	26.6758	FALSE	0
2022-09-14	14:07:59	0.737875	3.28222	29.3643	FALSE	0
2022-09-14	14:07:59	0.73472	3.26818	29.944	FALSE	0
2022-09-14	14:08:00	0.733499	3.26275	32.627	FALSE	0
2022-09-14	14:08:00	0.73243	3.258	33.202	FALSE	0
2022-09-14	14:08:00	0.730751	3.25053	35.8776	FALSE	0
2022-09-14	14:08:00	0.728054	3.23853	36.4405	FALSE	0
2022-09-14	14:08:01	0.734975	3.26932	39.1469	FALSE	0
2022-09-14	14:08:01	0.730852	3.25098	39.6915	FALSE	0
2022-09-14	14:08:01	0.735382	3.27113	42.418	FALSE	0
2022-09-14	14:08:01	0.733041	3.26071	42.9522	FALSE	0
2022-09-14	14:08:02	0.807901	3.59371	46.0117	FALSE	0
2022-09-14	14:08:02	0.588715	2.61872	45.571	FALSE	0
2022-09-14	14:08:02	0.750649	3.33904	49.3507	FALSE	0
2022-09-14	14:08:02	0.739402	3.28901	48.86	FALSE	0
2022-09-14	14:08:03	0.732786	3.25958	52.6103	FALSE	0
2022-09-14	14:08:03	0.738537	3.28516	52.1451	FALSE	0
2022-09-14	14:08:03	0.730903	3.2512	55.8615	FALSE	0
2022-09-14	14:08:04	0.727952	3.23808	55.3832	FALSE	0
2022-09-14	14:08:04	0.733499	3.26275	59.1243	FALSE	0
2022-09-14	14:08:04	0.726781	3.23287	58.6161	FALSE	0
2022-09-14	14:08:04	0.722354	3.21318	62.3375	FALSE	0
2022-09-14	14:08:05	1.4736	6.55487	65.1709	FALSE	0
2022-09-14	14:08:05	1.17258	5.21587	67.5533	FALSE	0
2022-09-14	14:08:05	0.739402	3.28901	68.4599	FALSE	0
2022-09-14	14:08:05	0.732583	3.25868	70.812	FALSE	0
2022-09-14	14:08:06	0.735178	3.27022	71.7302	FALSE	0
2022-09-14	14:08:06	0.730343	3.24871	74.0607	FALSE	0
2022-09-14	14:08:06	0.736959	3.27814	75.0083	FALSE	0
2022-09-14	14:08:06	0.732532	3.25845	77.3192	FALSE	0
2022-09-14	14:08:07	0.728664	3.24124	78.2495	FALSE	0
2022-09-14	14:08:07	0.735585	3.27203	80.5912	FALSE	0
2022-09-14	14:08:07	0.734517	3.26728	81.5168	FALSE	0
2022-09-14	14:08:08	0.733499	3.26275	83.8539	FALSE	0
2022-09-14	14:08:08	0.730191	3.24804	84.7649	FALSE	0
2022-09-14	14:08:08	0.738028	3.2829	87.1368	FALSE	0
2022-09-14	14:08:08	0.732277	3.25731	88.0222	FALSE	0
2022-09-14	14:08:09	0.733244	3.26162	90.3985	FALSE	0
2022-09-14	14:08:09	0.733651	3.26343	91.2856	FALSE	0
2022-09-14	14:08:09	0.729936	3.2469	93.6454	FALSE	0
2022-09-14	14:08:09	0.731209	3.25256	94.5382	FALSE	0
2022-09-14	14:08:10	0.73187	3.2555	96.9009	FALSE	0
2022-09-14	14:08:10	0.729428	3.24464	97.7828	FALSE	0
2022-09-14	14:08:10	0.737824	3.28199	100.183	FALSE	0
2022-09-14	14:08:10	0.730038	3.24736	101.03	FALSE	0
2022-09-14	14:08:11	0.729784	3.24623	103.429	FALSE	0
2022-09-14	14:08:11	0.739707	3.29036	104.321	FALSE	0
2022-09-14	14:08:11	0.735127	3.26999	106.699	FALSE	0
2022-09-14	14:08:12	0.734415	3.26682	107.587	FALSE	0
2022-09-14	14:08:12	0.733753	3.26388	109.963	FALSE	0
2022-09-14	14:08:12	0.731921	3.25573	110.843	FALSE	0
2022-09-14	14:08:12	0.540165	2.40276	112.366	FALSE	0
2022-09-14	14:08:13	0.718435	3.19574	114.039	FALSE	0
2022-09-14	14:08:13	0.731972	3.25596	115.622	FALSE	0
2022-09-14	14:08:13	0.733957	3.26479	117.304	FALSE	0
2022-09-14	14:08:13	0.733906	3.26456	118.886	FALSE	0
2022-09-14	14:08:14	0.735483	3.27158	120.575	FALSE	0
2022-09-14	14:08:14	0.735483	3.27158	122.158	FALSE	0
2022-09-14	14:08:14	0.73701	3.27837	123.854	FALSE	0
2022-09-14	14:08:14	0.725458	3.22698	125.385	FALSE	0
2022-09-14	14:08:15	0.73299	3.26049	127.114	FALSE	0
2022-09-14	14:08:15	0.734313	3.26637	128.651	FALSE	0
2022-09-14	14:08:15	0.733448	3.26252	130.377	FALSE	0
2022-09-14	14:08:16	0.728308	3.23966	131.891	FALSE	0
2022-09-14	14:08:16	0.738384	3.28448	133.661	FALSE	0
2022-09-14	14:08:16	0.73757	3.28086	135.172	FALSE	0
2022-09-14	14:08:16	0.738689	3.28584	136.947	FALSE	0
2022-09-14	14:08:17	0.727036	3.234	138.406	FALSE	0
2022-09-14	14:08:17	0.748613	3.32998	140.277	FALSE	0
2022-09-14	14:08:17	0.725814	3.22857	141.634	FALSE	0
2022-09-14	14:08:17	0.728003	3.2383	143.515	FALSE	0
2022-09-14	14:08:18	0.738181	3.28358	144.918	FALSE	0
2022-09-14	14:08:18	0.669631	2.97865	146.494	FALSE	0
2022-09-14	14:08:18	-0.385279	-1.7138	144.918	FALSE	0
2022-09-14	14:08:18	-0.00197174	-0.00877069	146.494	FALSE	0
2022-09-14	14:08:19	0.711718	3.16586	148.084	FALSE	0
2022-09-14	14:08:19	0.727494	3.23604	149.73	FALSE	0
2022-09-14	14:08:19	0.728359	3.23989	151.324	FALSE	0
2022-09-14	14:08:20	0.728308	3.23966	152.97	FALSE	0
2022-09-14	14:08:20	0.735789	3.27294	154.597	FALSE	0
2022-09-14	14:08:20	0.731005	3.25166	156.221	FALSE	0
2022-09-14	14:08:20	0.733651	3.26343	157.86	FALSE	0
2022-09-14	14:08:21	0.729122	3.24328	159.464	FALSE	0
2022-09-14	14:08:21	0.736756	3.27724	161.137	FALSE	0
2022-09-14	14:08:21	0.738028	3.2829	162.747	FALSE	0
2022-09-14	14:08:21	0.735026	3.26954	164.407	FALSE	0
2022-09-14	14:08:22	0.733295	3.26184	166.009	FALSE	0
2022-09-14	14:08:22	0.729377	3.24441	167.651	FALSE	0
2022-09-14	14:08:22	0.734059	3.26524	169.274	FALSE	0
2022-09-14	14:08:22	0.740216	3.29263	170.944	FALSE	0
2022-09-14	14:08:23	0.739097	3.28765	172.562	FALSE	0
2022-09-14	14:08:23	0.757316	3.36869	174.312	FALSE	0
2022-09-14	14:08:23	0.762506	3.39178	175.954	FALSE	0
2022-09-14	14:08:24	0.731412	3.25347	177.566	FALSE	0
2022-09-14	14:08:24	0.728613	3.24102	179.195	FALSE	0
2022-09-14	14:08:24	0.735026	3.26954	180.835	FALSE	0
2022-09-14	14:08:24	0.735229	3.27045	182.465	FALSE	0
2022-09-14	14:08:25	0.732735	3.25935	184.095	FALSE	0
2022-09-14	14:08:25	0.727341	3.23536	185.701	FALSE	0
2022-09-14	14:08:25	0.735483	3.27158	187.366	FALSE	0
2022-09-14	14:08:25	0.735483	3.27158	188.972	FALSE	0
2022-09-14	14:08:26	0.729428	3.24464	190.611	FALSE	0
2022-09-14	14:08:26	0.537926	2.3928	191.365	FALSE	0
2022-09-14	14:08:26	0.725458	3.22698	193.838	FALSE	0
2022-09-14	14:08:26	0.72897	3.2426	194.608	FALSE	0
2022-09-14	14:08:27	0.732277	3.25731	197.095	FALSE	0
2022-09-14	14:08:27	0.733601	3.2632	197.871	FALSE	0
2022-09-14	14:08:27	0.727545	3.23627	200.332	FALSE	0
2022-09-14	14:08:28	0.789987	3.51402	201.385	FALSE	0
2022-09-14	14:08:28	2.45803	10.9338	211.265	FALSE	0
2022-09-14	14:08:28	0.734364	3.2666	204.651	FALSE	0
2022-09-14	14:08:28	0.734618	3.26773	214.533	FALSE	0
2022-09-14	14:08:29	0.739402	3.28901	207.94	FALSE	0
2022-09-14	14:08:29	0.737875	3.28222	217.815	FALSE	0
2022-09-14	14:08:29	0.739198	3.2881	211.229	FALSE	0
2022-09-14	14:08:29	0.737468	3.28041	221.096	FALSE	0
2022-09-14	14:08:30	0.734873	3.26886	214.497	FALSE	0
2022-09-14	14:08:30	0.732532	3.25845	224.354	FALSE	0
2022-09-14	14:08:30	1.06403	4.73302	219.23	FALSE	0
2022-09-14	14:08:30	0.775992	3.45177	227.806	FALSE	0
2022-09-14	14:08:31	0.734568	3.26751	222.498	FALSE	0
2022-09-14	14:08:31	0.735738	3.27271	231.079	FALSE	0
2022-09-14	14:08:31	0.733601	3.2632	225.761	FALSE	0
2022-09-14	14:08:32	0.730394	3.24894	234.328	FALSE	0
2022-09-14	14:08:32	0.730852	3.25098	229.012	FALSE	0
2022-09-14	14:08:32	0.736857	3.27769	237.605	FALSE	0
2022-09-14	14:08:32	0.732837	3.25981	232.272	FALSE	0
2022-09-14	14:08:33	0.731768	3.25505	240.86	FALSE	0
2022-09-14	14:08:33	0.73187	3.2555	235.527	FALSE	0
2022-09-14	14:08:33	0.738689	3.28584	244.146	FALSE	0
2022-09-14	14:08:33	0.740929	3.2958	238.823	FALSE	0
2022-09-14	14:08:34	0.736349	3.27543	247.422	FALSE	0
2022-09-14	14:08:34	0.738028	3.2829	242.106	FALSE	0
2022-09-14	14:08:34	0.733499	3.26275	250.684	FALSE	0
2022-09-14	14:08:34	0.732481	3.25822	245.364	FALSE	0
2022-09-14	14:08:35	0.728613	3.24102	253.925	FALSE	0
2022-09-14	14:08:35	0.728664	3.24124	248.606	FALSE	0
2022-09-14	14:08:35	0.736654	3.27678	257.202	FALSE	0
2022-09-14	14:08:36	0.728868	3.24215	251.848	FALSE	0
2022-09-14	14:08:36	0.730852	3.25098	260.453	FALSE	0
2022-09-14	14:08:36	0.731463	3.25369	255.101	FALSE	0
2022-09-14	14:08:36	0.735585	3.27203	263.725	FALSE	0
2022-09-14	14:08:37	0.738028	3.2829	258.384	FALSE	0
2022-09-14	14:08:37	0.739606	3.28992	267.015	FALSE	0
2022-09-14	14:08:37	0.732735	3.25935	261.644	FALSE	0
2022-09-14	14:08:38	0.735534	3.2718	270.287	FALSE	0
2022-09-14	14:08:38	0.735483	3.27158	264.915	FALSE	0
2022-09-14	14:08:38	0.732888	3.26003	273.547	FALSE	0
2022-09-14	14:08:38	0.729936	3.2469	268.162	FALSE	0
2022-09-14	14:08:38	0.733601	3.2632	276.81	FALSE	0
2022-09-14	14:08:39	0.737468	3.28041	271.443	FALSE	0
2022-09-14	14:08:39	0.73187	3.2555	280.066	FALSE	0
2022-09-14	14:08:39	0.734415	3.26682	274.709	FALSE	0
2022-09-14	14:08:40	0.72841	3.24011	283.306	FALSE	0
2022-09-14	14:08:40	0.72897	3.2426	277.952	FALSE	0
2022-09-14	14:08:40	0.736908	3.27791	286.584	FALSE	0
2022-09-14	14:08:40	0.735534	3.2718	281.224	FALSE	0
2022-09-14	14:08:41	0.735127	3.26999	289.854	FALSE	0
2022-09-14	14:08:41	0.737366	3.27995	284.504	FALSE	0
2022-09-14	14:08:41	0.73416	3.26569	293.119	FALSE	0
2022-09-14	14:08:41	0.728054	3.23853	287.742	FALSE	0
2022-09-14	14:08:42	0.729682	3.24577	296.365	FALSE	0
2022-09-14	14:08:42	0.728054	3.23853	290.981	FALSE	0
2022-09-14	14:08:42	0.726832	3.23309	299.598	FALSE	0
2022-09-14	14:08:42	0.728868	3.24215	294.223	FALSE	0
2022-09-14	14:08:43	0.732481	3.25822	302.856	FALSE	0
2022-09-14	14:08:43	0.729733	3.246	297.469	FALSE	0
2022-09-14	14:08:43	0.729987	3.24713	306.104	FALSE	0
2022-09-14	14:08:44	0.730343	3.24871	300.718	FALSE	0
2022-09-14	14:08:44	0.733092	3.26094	309.364	FALSE	0
2022-09-14	14:08:44	0.734618	3.26773	303.985	FALSE	0
2022-09-14	14:08:44	0.731158	3.25234	312.617	FALSE	0
2022-09-14	14:08:45	0.729275	3.24396	307.229	FALSE	0
2022-09-14	14:08:45	0.727392	3.23559	315.852	FALSE	0
2022-09-14	14:08:45	0.729377	3.24441	310.474	FALSE	0
2022-09-14	14:08:45	0.731565	3.25415	319.107	FALSE	0
2022-09-14	14:08:46	0.739911	3.29127	313.765	FALSE	0
2022-09-14	14:08:46	0.730903	3.2512	322.358	FALSE	0
2022-09-14	14:08:46	0.735026	3.26954	317.035	FALSE	0
2022-09-14	14:08:46	0.734262	3.26614	325.624	FALSE	0
2022-09-14	14:08:47	0.728461	3.24034	320.275	FALSE	0
2022-09-14	14:08:47	0.731158	3.25234	328.876	FALSE	0
2022-09-14	14:08:47	0.725712	3.22811	323.503	FALSE	0
2022-09-14	14:08:48	0.738231	3.2838	332.16	FALSE	0
2022-09-14	14:08:48	0.726476	3.23151	326.735	FALSE	0
2022-09-14	14:08:48	0.729682	3.24577	335.406	FALSE	0
2022-09-14	14:08:48	0.736247	3.27497	330.01	FALSE	0
2022-09-14	14:08:49	0.728155	3.23898	338.645	FALSE	0
2022-09-14	14:08:49	0.733753	3.26388	333.273	FALSE	0
2022-09-14	14:08:49	0.731056	3.25188	341.897	FALSE	0
2022-09-14	14:08:49	0.731514	3.25392	336.527	FALSE	0
2022-09-14	14:08:50	0.736043	3.27407	345.171	FALSE	0
2022-09-14	14:08:50	0.731972	3.25596	339.783	FALSE	0
2022-09-14	14:08:50	0.732735	3.25935	348.43	FALSE	0
2022-09-14	14:08:50	0.734262	3.26614	343.049	FALSE	0
2022-09-14	14:08:51	0.728766	3.2417	351.672	FALSE	0
2022-09-14	14:08:51	0.732125	3.25664	346.306	FALSE	0
2022-09-14	14:08:51	0.728003	3.2383	354.91	FALSE	0
2022-09-14	14:08:52	0.73187	3.2555	349.562	FALSE	0
2022-09-14	14:08:52	0.728359	3.23989	358.15	FALSE	0
2022-09-14	14:08:52	0.727036	3.234	352.796	FALSE	0
2022-09-14	14:08:52	0.732379	3.25777	361.408	FALSE	0
2022-09-14	14:08:53	0.731768	3.25505	356.051	FALSE	0
2022-09-14	14:08:53	0.726781	3.23287	364.641	FALSE	0
2022-09-14	14:08:53	0.732277	3.25731	359.308	FALSE	0
2022-09-14	14:08:53	0.737824	3.28199	367.923	FALSE	0
2022-09-14	14:08:54	0.732939	3.26026	362.568	FALSE	0
2022-09-14	14:08:54	0.728919	3.24238	371.165	FALSE	0
2022-09-14	14:08:54	0.730649	3.25007	365.818	FALSE	0
2022-09-14	14:08:54	0.733295	3.26184	374.427	FALSE	0
2022-09-14	14:08:55	0.732125	3.25664	369.075	FALSE	0
2022-09-14	14:08:55	0.729326	3.24419	377.671	FALSE	0
2022-09-14	14:08:55	0.732175	3.25686	372.332	FALSE	0
2022-09-14	14:08:56	0.7307	3.2503	380.921	FALSE	0
2022-09-14	14:08:56	0.74444	3.31142	375.643	FALSE	0
2022-09-14	14:08:56	0.743575	3.30757	384.229	FALSE	0
2022-09-14	14:08:56	0.730394	3.24894	378.892	FALSE	0
2022-09-14	14:08:57	0.692939	3.08233	387.311	FALSE	0
2022-09-14	14:08:57	0.649275	2.88811	381.78	FALSE	0
2022-09-14	14:08:57	0.536603	2.38692	389.698	FALSE	0
2022-09-14	14:08:57	0.37416	1.66434	383.445	FALSE	0
2022-09-14	14:08:58	-0.160598	-0.714372	389.698	FALSE	0
2022-09-14	14:08:58	-0.386653	-1.71991	383.445	FALSE	0
2022-09-14	14:08:58	-0.321412	-1.4297	389.698	FALSE	0
2022-09-14	14:08:58	-0.313066	-1.39258	383.445	FALSE	0
2022-09-14	14:08:59	-0.0281295	-0.125126	389.698	FALSE	0
2022-09-14	14:08:59	0.692532	3.08052	386.525	FALSE	0
2022-09-14	14:08:59	0.730751	3.25053	392.949	FALSE	0
2022-09-14	14:09:00	0.684084	3.04294	389.568	FALSE	0
2022-09-14	14:09:00	0.706679	3.14345	396.092	FALSE	0
2022-09-14	14:09:00	0.636603	2.83174	392.4	FALSE	0
2022-09-14	14:09:00	0.636552	2.83151	398.924	FALSE	0
2022-09-14	14:09:01	0.732583	3.25868	395.658	FALSE	0
2022-09-14	14:09:01	0.554059	2.46457	401.388	FALSE	0
2022-09-14	14:09:01	0.681794	3.03276	398.691	FALSE	0
2022-09-14	14:09:01	0.483117	2.149	403.537	FALSE	0
2022-09-14	14:09:02	0.607901	2.70407	401.395	FALSE	0
2022-09-14	14:09:02	0.758384	3.37344	406.911	FALSE	0
2022-09-14	14:09:02	0.725458	3.22698	404.622	FALSE	0
2022-09-14	14:09:02	0.640725	2.85007	409.761	FALSE	0
2022-09-14	14:09:03	0.517163	2.30044	406.923	FALSE	0
2022-09-14	14:09:03	0.785254	3.49297	413.254	FALSE	0
2022-09-14	14:09:03	0.618893	2.75296	409.676	FALSE	0
2022-09-14	14:09:04	0.54042	2.4039	415.658	FALSE	0
2022-09-14	14:09:04	0.491921	2.18816	411.864	FALSE	0
2022-09-14	14:09:04	0.463982	2.06388	417.721	FALSE	0
2022-09-14	14:09:04	0.426323	1.89637	413.76	FALSE	0
2022-09-14	14:09:05	0.433804	1.92965	419.651	FALSE	0
2022-09-14	14:09:05	0.431361	1.91878	415.679	FALSE	0
2022-09-14	14:09:05	0.409529	1.82167	421.473	FALSE	0
2022-09-14	14:09:05	0.40215	1.78884	417.468	FALSE	0
2022-09-14	14:09:06	0.395942	1.76123	423.234	FALSE	0
2022-09-14	14:09:06	0.397214	1.76689	419.235	FALSE	0
2022-09-14	14:09:06	0.398537	1.77277	425.007	FALSE	0
2022-09-14	14:09:06	0.398028	1.77051	421.005	FALSE	0
2022-09-14	14:09:07	0.391463	1.74131	426.748	FALSE	0
2022-09-14	14:09:07	0.376858	1.67634	422.682	FALSE	0
2022-09-14	14:09:07	0.343728	1.52897	428.277	FALSE	0
2022-09-14	14:09:08	0.345255	1.53576	424.217	FALSE	0
2022-09-14	14:09:08	0.353702	1.57334	429.85	FALSE	0
2022-09-14	14:09:08	0.34383	1.52942	425.747	FALSE	0
2022-09-14	14:09:08	0.355942	1.5833	431.434	FALSE	0
2022-09-14	14:09:09	0.350293	1.55817	427.305	FALSE	0
2022-09-14	14:09:09	0.368766	1.64034	433.074	FALSE	0
2022-09-14	14:09:09	2.84719	12.6649	439.97	FALSE	0
2022-09-14	14:09:09	2.19645	9.77025	442.844	FALSE	0
2022-09-14	14:09:10	0.761387	3.3868	443.357	FALSE	0
2022-09-14	14:09:10	0.706679	3.14345	445.988	FALSE	0
2022-09-14	14:09:10	0.696247	3.09705	446.454	FALSE	0
2022-09-14	14:09:10	0.690852	3.07305	449.061	FALSE	0
2022-09-14	14:09:11	0.665611	2.96077	449.414	FALSE	0
2022-09-14	14:09:11	0.637417	2.83536	451.896	FALSE	0
2022-09-14	14:09:11	-0.455	-2.02393	449.414	FALSE	0
2022-09-14	14:09:12	-0.561513	-2.49772	451.896	FALSE	0
2022-09-14	14:09:12	-0.542124	-2.41148	449.414	FALSE	0
2022-09-14	14:09:12	-0.225381	-1.00254	451.896	FALSE	0
2022-09-14	14:09:12	0.200471	0.891735	450.306	FALSE	0
2022-09-14	14:09:13	0.238028	1.0588	452.955	FALSE	0
2022-09-14	14:09:13	0.195076	0.867737	451.174	FALSE	0
2022-09-14	14:09:13	0.199097	0.885623	453.841	FALSE	0
2022-09-14	14:09:13	0.0443895	0.197453	451.371	FALSE	0
2022-09-14	14:09:14	0.187952	0.836048	454.677	FALSE	0
2022-09-14	14:09:14	-0.158613	-0.705542	451.371	FALSE	0
2022-09-14	14:09:14	-0.289503	-1.28777	454.677	FALSE	0
2022-09-14	14:09:14	-0.0268572	-0.119466	451.371	FALSE	0
2022-09-14	14:09:15	-0.371488	-1.65245	454.677	FALSE	0
2022-09-14	14:09:15	-0.562582	-2.50248	451.371	FALSE	0
2022-09-14	14:09:15	-0.569554	-2.53349	454.677	FALSE	0
2022-09-14	14:09:16	-0.480343	-2.13666	451.371	FALSE	0
2022-09-14	14:09:16	-0.569758	-2.5344	454.677	FALSE	0
2022-09-14	14:09:16	-0.436068	-1.93972	451.371	FALSE	0
2022-09-14	14:09:16	-0.437646	-1.94674	454.677	FALSE	0
2022-09-14	14:09:17	-0.275712	-1.22642	451.371	FALSE	0
2022-09-14	14:09:17	-0.350725	-1.56009	454.677	FALSE	0
2022-09-14	14:09:17	-0.242684	-1.07951	451.371	FALSE	0
2022-09-14	14:09:17	-0.119325	-0.530781	454.677	FALSE	0
2022-09-14	14:09:18	-0.213626	-0.950251	451.371	FALSE	0
2022-09-14	14:09:18	-0.209962	-0.933953	454.677	FALSE	0
2022-09-14	14:09:18	-0.200241	-0.890712	451.371	FALSE	0
2022-09-14	14:09:18	-0.364618	-1.62189	454.677	FALSE	0
2022-09-14	14:09:19	-0.482073	-2.14436	451.371	FALSE	0
2022-09-14	14:09:19	-0.443804	-1.97413	454.677	FALSE	0
2022-09-14	14:09:19	-0.386653	-1.71991	451.371	FALSE	0
2022-09-14	14:09:20	-0.392862	-1.74753	454.677	FALSE	0
2022-09-14	14:09:20	-0.300547	-1.33689	451.371	FALSE	0
2022-09-14	14:09:20	0.0383845	0.170742	454.847	FALSE	0
2022-09-14	14:09:20	0.00754479	0.0335607	451.405	FALSE	0
2022-09-14	14:09:21	-0.101972	-0.453592	454.847	FALSE	0
2022-09-14	14:09:21	-0.211895	-0.942551	451.405	FALSE	0
2022-09-14	14:09:21	-0.323753	-1.44012	454.847	FALSE	0
2022-09-14	14:09:21	-0.368486	-1.6391	451.405	FALSE	0
2022-09-14	14:09:22	-0.302073	-1.34368	454.847	FALSE	0
2022-09-14	14:09:22	-0.286501	-1.27441	451.405	FALSE	0
2022-09-14	14:09:22	-0.179987	-0.800618	454.847	FALSE	0
2022-09-14	14:09:22	-0.145585	-0.647591	451.405	FALSE	0
2022-09-14	14:09:23	-0.238308	-1.06004	454.847	FALSE	0
2022-09-14	14:09:23	-0.332811	-1.48041	451.405	FALSE	0
2022-09-14	14:09:23	-0.406908	-1.81001	454.847	FALSE	0
2022-09-14	14:09:24	-0.326246	-1.45121	451.405	FALSE	0
2022-09-14	14:09:24	-0.280241	-1.24657	454.847	FALSE	0
2022-09-14	14:09:24	-0.253422	-1.12727	451.405	FALSE	0
2022-09-14	14:09:24	-0.205229	-0.9129	454.847	FALSE	0
2022-09-14	14:09:25	-0.00207355	-0.00922357	451.405	FALSE	0
2022-09-14	14:09:25	-0.0800379	-0.356025	454.847	FALSE	0
2022-09-14	14:09:25	0.0642878	0.285965	451.691	FALSE	0
2022-09-14	14:09:25	2.04011	9.07482	463.922	FALSE	0
2022-09-14	14:09:26	2.95075	13.1255	464.816	FALSE	0
2022-09-14	14:09:26	0.55187	2.45483	466.377	FALSE	0
2022-09-14	14:09:26	0.458232	2.03831	466.855	FALSE	0
2022-09-14	14:09:26	0.372176	1.65551	468.032	FALSE	0
2022-09-14	14:09:27	0.277723	1.23537	468.09	FALSE	0
2022-09-14	14:09:27	0.15757	0.700903	468.733	FALSE	0
2022-09-14	14:09:27	0.0119723	0.0532552	468.143	FALSE	0
2022-09-14	14:09:28	-0.0988165	-0.439556	468.733	FALSE	0
2022-09-14	14:09:28	0.531565	2.36451	470.508	FALSE	0
2022-09-14	14:09:28	0.926781	4.12251	472.856	FALSE	0
2022-09-14	14:09:28	0.569631	2.53383	473.042	FALSE	0
2022-09-14	14:09:29	0.600369	2.67056	475.526	FALSE	0
2022-09-14	14:09:29	0.487748	2.1696	475.211	FALSE	0
2022-09-14	14:09:29	0.765458	3.40491	478.931	FALSE	0
2022-09-14	14:09:29	0.662964	2.949	478.16	FALSE	0
2022-09-14	14:09:30	0.612277	2.72353	481.655	FALSE	0
2022-09-14	14:09:30	0.467901	2.08132	480.242	FALSE	0
2022-09-14	14:09:30	0.460471	2.04827	483.703	FALSE	0
2022-09-14	14:09:30	0.416654	1.85336	482.095	FALSE	0
2022-09-14	14:09:31	0.487137	2.16688	485.87	FALSE	0
2022-09-14	14:09:31	0.445814	1.98307	484.078	FALSE	0
2022-09-14	14:09:31	0.436705	1.94255	487.813	FALSE	0
2022-09-14	14:09:32	0.390344	1.73633	485.814	FALSE	0
2022-09-14	14:09:32	0.435127	1.93553	489.748	FALSE	0
2022-09-14	14:09:32	0.495026	2.20197	488.016	FALSE	0
2022-09-14	14:09:32	0.39701	1.76598	491.514	FALSE	0
2022-09-14	14:09:33	0.371616	1.65302	489.669	FALSE	0
2022-09-14	14:09:33	0.412227	1.83367	493.348	FALSE	0
2022-09-14	14:09:33	0.436298	1.94074	491.61	FALSE	0
2022-09-14	14:09:33	0.542659	2.41386	495.762	FALSE	0
2022-09-14	14:09:34	0.575738	2.561	494.171	FALSE	0
2022-09-14	14:09:34	0.625	2.78012	498.542	FALSE	0
2022-09-14	14:09:34	0.661438	2.94221	497.113	FALSE	0
2022-09-14	14:09:34	0.674974	3.00242	501.544	FALSE	0
2022-09-14	14:09:35	0.581641	2.58726	499.701	FALSE	0
2022-09-14	14:09:35	0.473804	2.10757	503.652	FALSE	0
2022-09-14	14:09:35	0.510954	2.27283	501.973	FALSE	0
2022-09-14	14:09:36	0.925356	4.11617	507.768	FALSE	0
2022-09-14	14:09:36	0.788104	3.50564	505.479	FALSE	0
2022-09-14	14:09:36	0.702048	3.12285	510.891	FALSE	0
2022-09-14	14:09:36	0.677366	3.01306	508.492	FALSE	0
2022-09-14	14:09:37	0.737112	3.27882	514.17	FALSE	0
2022-09-14	14:09:37	0.781946	3.47825	511.97	FALSE	0
2022-09-14	14:09:37	0.460369	2.04781	516.217	FALSE	0
2022-09-14	14:09:37	0.470649	2.09354	514.064	FALSE	0
2022-09-14	14:09:38	0.493957	2.19722	518.415	FALSE	0
2022-09-14	14:09:38	0.364898	1.62314	515.687	FALSE	0
2022-09-14	14:09:38	0.294211	1.30871	519.723	FALSE	0
2022-09-14	14:09:38	0.257672	1.14618	516.833	FALSE	0
2022-09-14	14:09:39	0.209733	0.932934	520.656	FALSE	0
2022-09-14	14:09:39	0.387239	1.72252	518.556	FALSE	0
2022-09-14	14:09:39	0.100725	0.448045	521.104	FALSE	0
2022-09-14	14:09:40	0.263219	1.17085	519.727	FALSE	0
2022-09-14	14:09:40	0.192023	0.854157	521.958	FALSE	0
2022-09-14	14:09:40	0.358944	1.59665	521.323	FALSE	0
2022-09-14	14:09:40	0.324949	1.44544	523.404	FALSE	0
2022-09-14	14:09:41	0.638588	2.84057	524.164	FALSE	0
2022-09-14	14:09:41	0.553397	2.46162	525.866	FALSE	0
2022-09-14	14:09:41	0.544237	2.42088	526.585	FALSE	0
2022-09-14	14:09:41	0.562354	2.50146	528.367	FALSE	0
2022-09-14	14:09:42	0.425102	1.89094	528.476	FALSE	0
2022-09-14	14:09:42	0.54388	2.41929	530.786	FALSE	0
2022-09-14	14:09:42	0.37472	1.66683	530.142	FALSE	0
2022-09-14	14:09:42	0.450751	2.00503	532.791	FALSE	0
2022-09-14	14:09:43	0.434618	1.93327	532.076	FALSE	0
2022-09-14	14:09:43	0.433601	1.92874	534.72	FALSE	0
2022-09-14	14:09:43	0.441234	1.9627	534.038	FALSE	0
2022-09-14	14:09:44	0.443066	1.97085	536.691	FALSE	0
2022-09-14	14:09:44	0.408613	1.81759	535.856	FALSE	0
2022-09-14	14:09:44	0.41014	1.82438	538.515	FALSE	0
2022-09-14	14:09:44	0.388919	1.72999	537.586	FALSE	0
2022-09-14	14:09:45	0.411107	1.82869	540.344	FALSE	0
2022-09-14	14:09:45	0.39757	1.76847	539.354	FALSE	0
2022-09-14	14:09:45	0.454008	2.01952	542.364	FALSE	0
2022-09-14	14:09:45	0.516756	2.29863	541.653	FALSE	0
2022-09-14	14:09:46	0.432888	1.92557	544.289	FALSE	0
2022-09-14	14:09:46	0.425713	1.89366	543.547	FALSE	0
2022-09-14	14:09:46	0.434211	1.93146	546.221	FALSE	0
2022-09-14	14:09:46	0.447748	1.99167	545.538	FALSE	0
2022-09-14	14:09:47	0.528766	2.35206	548.573	FALSE	0
2022-09-14	14:09:47	0.315687	1.40424	546.943	FALSE	0
2022-09-14	14:09:47	1.18653	5.27792	553.851	FALSE	0
2022-09-14	14:09:48	2.97579	13.2369	560.18	FALSE	0
2022-09-14	14:09:48	1.83869	8.17886	562.029	FALSE	0
2022-09-14	14:09:48	0.735636	3.27226	563.452	FALSE	0
2022-09-14	14:09:48	0.624847	2.77944	564.809	FALSE	0
2022-09-14	14:09:49	0.449173	1.99801	565.45	FALSE	0
2022-09-14	14:09:49	0.494975	2.20175	567.011	FALSE	0
2022-09-14	14:09:49	0.598384	2.66173	568.112	FALSE	0
2022-09-14	14:09:49	0.653244	2.90576	569.916	FALSE	0
2022-09-14	14:09:50	0.710903	3.16224	571.274	FALSE	0
2022-09-14	14:09:50	0.731107	3.25211	573.168	FALSE	0
2022-09-14	14:09:50	0.730751	3.25053	574.524	FALSE	0
2022-09-14	14:09:50	0.733804	3.26411	576.433	FALSE	0
2022-09-14	14:09:51	0.729224	3.24373	577.768	FALSE	0
2022-09-14	14:09:51	0.734669	3.26795	579.7	FALSE	0
2022-09-14	14:09:51	0.730598	3.24985	581.018	FALSE	0
2022-09-14	14:09:52	0.727392	3.23559	582.936	FALSE	0
2022-09-14	14:09:52	0.734924	3.26909	584.287	FALSE	0
2022-09-14	14:09:52	0.731463	3.25369	586.19	FALSE	0
2022-09-14	14:09:52	0.749987	3.33609	587.623	FALSE	0
2022-09-14	14:09:53	0.726476	3.23151	589.421	FALSE	0
2022-09-14	14:09:53	0.730394	3.24894	590.872	FALSE	0
2022-09-14	14:09:53	0.734059	3.26524	592.687	FALSE	0
2022-09-14	14:09:53	0.735891	3.27339	594.145	FALSE	0
2022-09-14	14:09:54	0.734059	3.26524	595.952	FALSE	0
2022-09-14	14:09:54	0.735127	3.26999	597.415	FALSE	0
2022-09-14	14:09:54	0.734924	3.26909	599.221	FALSE	0
2022-09-14	14:09:54	0.734364	3.2666	600.682	FALSE	0
2022-09-14	14:09:55	0.729631	3.24554	602.466	FALSE	0
2022-09-14	14:09:55	0.730038	3.24736	603.929	FALSE	0
2022-09-14	14:09:55	0.733346	3.26207	605.728	FALSE	0
2022-09-14	14:09:56	0.736298	3.2752	607.205	FALSE	0
2022-09-14	14:09:56	0.659148	2.93202	608.66	FALSE	0
2022-09-14	14:09:56	-1.26833	-5.64179	607.205	FALSE	0
2022-09-14	14:09:56	0.41187	1.83208	610.493	FALSE	0
2022-09-14	14:09:57	-0.166399	-0.740176	607.205	FALSE	0
2022-09-14	14:09:57	-0.746399	-3.32013	610.493	FALSE	0
2022-09-14	14:09:57	0.737977	3.28267	610.487	FALSE	0
2022-09-14	14:09:57	0.736399	3.27565	613.768	FALSE	0
2022-09-14	14:09:58	0.73584	3.27316	613.76	FALSE	0
2022-09-14	14:09:58	0.733651	3.26343	617.032	FALSE	0
2022-09-14	14:09:58	0.731005	3.25166	617.012	FALSE	0
2022-09-14	14:09:58	0.761488	3.38725	620.419	FALSE	0
2022-09-14	14:09:59	0.746883	3.32228	620.334	FALSE	0
2022-09-14	14:09:59	0.727646	3.23671	623.656	FALSE	0
2022-09-14	14:09:59	0.730293	3.24849	623.583	FALSE	0
2022-09-14	14:10:00	0.736399	3.27565	626.931	FALSE	0
2022-09-14	14:10:00	0.736399	3.27565	626.858	FALSE	0
2022-09-14	14:10:00	0.728155	3.23898	630.17	FALSE	0
2022-09-14	14:10:00	0.733295	3.26184	630.12	FALSE	0
2022-09-14	14:10:01	0.73299	3.26049	633.431	FALSE	0
2022-09-14	14:10:01	0.731565	3.25415	633.374	FALSE	0
2022-09-14	14:10:01	0.728919	3.24238	636.673	FALSE	0
2022-09-14	14:10:01	0.738486	3.28493	636.659	FALSE	0
2022-09-14	14:10:02	0.738995	3.2872	639.96	FALSE	0
2022-09-14	14:10:02	0.727239	3.2349	639.894	FALSE	0
2022-09-14	14:10:02	0.731514	3.25392	643.214	FALSE	0
2022-09-14	14:10:02	0.739147	3.28787	643.182	FALSE	0
2022-09-14	14:10:03	0.735076	3.26977	646.484	FALSE	0
2022-09-14	14:10:03	0.730954	3.25143	646.434	FALSE	0
2022-09-14	14:10:03	0.733855	3.26433	649.748	FALSE	0
2022-09-14	14:10:04	0.728461	3.24034	649.674	FALSE	0
2022-09-14	14:10:04	0.73355	3.26298	653.011	FALSE	0
2022-09-14	14:10:04	0.734873	3.26886	652.943	FALSE	0
2022-09-14	14:10:04	0.737366	3.27995	656.291	FALSE	0
2022-09-14	14:10:05	0.729224	3.24373	656.187	FALSE	0
2022-09-14	14:10:05	0.732125	3.25664	659.548	FALSE	0
2022-09-14	14:10:05	0.739707	3.29036	659.477	FALSE	0
2022-09-14	14:10:05	0.732583	3.25868	662.807	FALSE	0
2022-09-14	14:10:06	0.72958	3.24532	662.722	FALSE	0
2022-09-14	14:10:06	0.728613	3.24102	666.048	FALSE	0
2022-09-14	14:10:06	0.732175	3.25686	665.979	FALSE	0
2022-09-14	14:10:06	0.731565	3.25415	669.302	FALSE	0
2022-09-14	14:10:07	0.726985	3.23377	669.213	FALSE	0
2022-09-14	14:10:07	0.737519	3.28063	672.582	FALSE	0
2022-09-14	14:10:07	0.72612	3.22993	672.443	FALSE	0
2022-09-14	14:10:08	0.734059	3.26524	675.848	FALSE	0
2022-09-14	14:10:08	0.734517	3.26728	675.71	FALSE	0
2022-09-14	14:10:08	0.734822	3.26864	679.116	FALSE	0
2022-09-14	14:10:08	0.596501	2.65336	678.363	FALSE	0
2022-09-14	14:10:09	-0.441412	-1.96349	679.116	FALSE	0
2022-09-14	14:10:09	0.728664	3.24124	681.605	FALSE	0
2022-09-14	14:10:09	0.735178	3.27022	682.386	FALSE	0
2022-09-14	14:10:09	0.735331	3.2709	684.876	FALSE	0
2022-09-14	14:10:10	0.731209	3.25256	685.639	FALSE	0
2022-09-14	14:10:10	0.733651	3.26343	688.139	FALSE	0
2022-09-14	14:10:10	0.73416	3.26569	688.905	FALSE	0
2022-09-14	14:10:10	0.738537	3.28516	691.424	FALSE	0
2022-09-14	14:10:11	0.744236	3.31051	692.215	FALSE	0
2022-09-14	14:10:11	0.735941	3.27361	694.698	FALSE	0
2022-09-14	14:10:11	0.740776	3.29512	695.51	FALSE	0
2022-09-14	14:10:12	0.73131	3.25301	697.951	FALSE	0
2022-09-14	14:10:12	0.726679	3.23241	698.743	FALSE	0
2022-09-14	14:10:12	0.732226	3.25709	701.208	FALSE	0
2022-09-14	14:10:12	0.731259	3.25279	701.996	FALSE	0
2022-09-14	14:10:13	0.732226	3.25709	704.465	FALSE	0
2022-09-14	14:10:13	0.734059	3.26524	705.261	FALSE	0
2022-09-14	14:10:13	0.624338	2.77718	707.242	FALSE	0
2022-09-14	14:10:13	0.134822	0.599715	705.861	FALSE	0
2022-09-14	14:10:14	0.172023	0.765193	708.007	FALSE	0
2022-09-14	14:10:14	0.0171631	0.0763449	705.937	FALSE	0
2022-09-14	14:10:14	-0.0422262	-0.187831	708.007	FALSE	0
2022-09-14	14:10:14	0.204797	0.910978	706.848	FALSE	0
2022-09-14	14:10:15	0.557112	2.47815	710.485	FALSE	0
2022-09-14	14:10:15	0.586832	2.61035	709.458	FALSE	0
2022-09-14	14:10:15	0.731463	3.25369	713.739	FALSE	0
2022-09-14	14:10:16	0.235738	1.04861	710.507	FALSE	0
2022-09-14	14:10:16	-0.340445	-1.51437	713.739	FALSE	0
2022-09-14	14:10:16	-0.421157	-1.87339	710.507	FALSE	0
2022-09-14	14:10:16	-0.415203	-1.84691	713.739	FALSE	0
2022-09-14	14:10:17	-0.402277	-1.78941	710.507	FALSE	0
2022-09-14	14:10:17	-0.409045	-1.81951	713.739	FALSE	0
2022-09-14	14:10:17	-0.40075	-1.78262	710.507	FALSE	0
2022-09-14	14:10:17	-0.394185	-1.75341	713.739	FALSE	0
2022-09-14	14:10:18	-0.378816	-1.68505	710.507	FALSE	0
2022-09-14	14:10:18	-0.393117	-1.74866	713.739	FALSE	0
2022-09-14	14:10:18	-0.362429	-1.61216	710.507	FALSE	0
2022-09-14	14:10:18	-0.38645	-1.71901	713.739	FALSE	0
2022-09-14	14:10:19	-0.399122	-1.77537	710.507	FALSE	0
2022-09-14	14:10:19	-0.384669	-1.71108	713.739	FALSE	0
2022-09-14	14:10:19	-0.380852	-1.69411	710.507	FALSE	0
2022-09-14	14:10:20	-0.376374	-1.67419	713.739	FALSE	0
2022-09-14	14:10:20	-0.372658	-1.65766	710.507	FALSE	0
2022-09-14	14:10:20	-0.382073	-1.69954	713.739	FALSE	0
2022-09-14	14:10:20	-0.375407	-1.66989	710.507	FALSE	0
2022-09-14	14:10:21	-0.363956	-1.61895	713.739	FALSE	0
2022-09-14	14:10:21	-0.332557	-1.47928	710.507	FALSE	0
2022-09-14	14:10:21	-0.313371	-1.39394	713.739	FALSE	0
2022-09-14	14:10:21	-0.308944	-1.37424	710.507	FALSE	0
2022-09-14	14:10:22	-0.339224	-1.50894	713.739	FALSE	0
2022-09-14	14:10:22	-0.363091	-1.6151	710.507	FALSE	0
2022-09-14	14:10:22	-0.362226	-1.61125	713.739	FALSE	0
2022-09-14	14:10:22	-0.378104	-1.68188	710.507	FALSE	0
2022-09-14	14:10:23	-0.376933	-1.67667	713.739	FALSE	0
2022-09-14	14:10:23	-0.373473	-1.66128	710.507	FALSE	0
2022-09-14	14:10:23	-0.368384	-1.63865	713.739	FALSE	0
2022-09-14	14:10:24	-0.371539	-1.65268	710.507	FALSE	0
2022-09-14	14:10:24	-0.372048	-1.65494	713.739	FALSE	0
2022-09-14	14:10:24	-0.378969	-1.68573	710.507	FALSE	0
2022-09-14	14:10:24	-0.37902	-1.68596	713.739	FALSE	0
2022-09-14	14:10:25	-0.37505	-1.6683	710.507	FALSE	0
2022-09-14	14:10:25	-0.370623	-1.64861	713.739	FALSE	0
2022-09-14	14:10:25	-0.366094	-1.62846	710.507	FALSE	0
2022-09-14	14:10:25	-0.357493	-1.5902	713.739	FALSE	0
2022-09-14	14:10:26	-0.361564	-1.60831	710.507	FALSE	0
2022-09-14	14:10:26	-0.33673	-1.49784	713.739	FALSE	0
2022-09-14	14:10:26	-0.231336	-1.02903	710.507	FALSE	0
2022-09-14	14:10:27	-0.345839	-1.53836	713.739	FALSE	0
2022-09-14	14:10:27	-0.431946	-1.92138	710.507	FALSE	0
2022-09-14	14:10:27	-0.3779	-1.68097	713.739	FALSE	0
2022-09-14	14:10:27	-0.316475	-1.40774	710.507	FALSE	0
2022-09-14	14:10:28	-0.454134	-2.02008	713.739	FALSE	0
2022-09-14	14:10:28	-0.698969	-3.10915	710.507	FALSE	0
2022-09-14	14:10:28	-0.801615	-3.56574	713.739	FALSE	0
2022-09-14	14:10:28	-0.863345	-3.84033	710.507	FALSE	0
2022-09-14	14:10:29	-0.581513	-2.58669	713.739	FALSE	0
2022-09-14	14:10:29	-0.604211	-2.68765	710.507	FALSE	0
2022-09-14	14:10:29	-0.524872	-2.33474	713.739	FALSE	0
2022-09-14	14:10:29	-0.353269	-1.57141	710.507	FALSE	0
2022-09-14	14:10:30	-0.169402	-0.753534	713.739	FALSE	0
2022-09-14	14:10:30	-0.157799	-0.701922	710.507	FALSE	0
2022-09-14	14:10:30	-0.0606995	-0.270004	713.739	FALSE	0
2022-09-14	14:10:30	0.0123794	0.055066	710.562	FALSE	0
2022-09-14	14:10:31	-0.0291473	-0.129653	713.739	FALSE	0
2022-09-14	14:10:31	-0.043702	-0.194395	710.562	FALSE	0
2022-09-14	14:10:31	0.0296313	0.131806	713.871	FALSE	0
2022-09-14	14:10:32	-0.0107758	-0.0479329	710.562	FALSE	0
2022-09-14	14:10:32	-0.03444	-0.153196	713.871	FALSE	0
2022-09-14	14:10:32	-0.0483331	-0.214995	710.562	FALSE	0
2022-09-14	14:10:32	-0.0408013	-0.181492	713.871	FALSE	0
2022-09-14	14:10:33	0.103575	0.460722	711.023	FALSE	0
2022-09-14	14:10:33	0.375585	1.67068	715.542	FALSE	0
2022-09-14	14:10:33	0.462761	2.05845	713.081	FALSE	0
2022-09-14	14:10:33	0.451514	2.00842	717.55	FALSE	0
2022-09-14	14:10:34	0.442252	1.96723	715.048	FALSE	0
2022-09-14	14:10:34	0.435585	1.93757	719.488	FALSE	0
2022-09-14	14:10:34	0.430445	1.91471	716.963	FALSE	0
2022-09-14	14:10:34	0.426527	1.89728	721.385	FALSE	0
2022-09-14	14:10:35	0.428308	1.9052	718.868	FALSE	0
2022-09-14	14:10:35	0.418944	1.86355	723.248	FALSE	0
2022-09-14	14:10:35	0.415942	1.85019	720.718	FALSE	0
2022-09-14	14:10:36	0.410242	1.82484	725.073	FALSE	0
2022-09-14	14:10:36	0.40673	1.80922	722.528	FALSE	0
2022-09-14	14:10:36	0.406781	1.80944	726.883	FALSE	0
2022-09-14	14:10:36	0.400674	1.78228	724.31	FALSE	0
2022-09-14	14:10:37	0.401234	1.78477	728.668	FALSE	0
2022-09-14	14:10:37	0.399148	1.77549	726.085	FALSE	0
2022-09-14	14:10:37	0.405407	1.80333	730.471	FALSE	0
2022-09-14	14:10:37	0.399453	1.77685	727.862	FALSE	0
2022-09-14	14:10:38	0.396959	1.76575	732.237	FALSE	0
2022-09-14	14:10:38	0.389886	1.73429	729.596	FALSE	0
2022-09-14	14:10:38	0.394059	1.75285	733.989	FALSE	0
2022-09-14	14:10:38	0.395636	1.75987	731.356	FALSE	0
2022-09-14	14:10:39	0.386832	1.72071	735.71	FALSE	0
2022-09-14	14:10:39	0.382914	1.70328	733.06	FALSE	0
2022-09-14	14:10:39	0.383422	1.70554	737.416	FALSE	0
2022-09-14	14:10:40	0.36958	1.64397	734.704	FALSE	0
2022-09-14	14:10:40	0.369835	1.6451	739.061	FALSE	0
2022-09-14	14:10:40	0.367188	1.63333	736.337	FALSE	0
2022-09-14	14:10:40	0.359199	1.59779	740.659	FALSE	0
2022-09-14	14:10:41	0.353601	1.57289	737.91	FALSE	0
2022-09-14	14:10:41	0.350598	1.55953	742.218	FALSE	0
2022-09-14	14:10:41	0.348053	1.54821	739.458	FALSE	0
2022-09-14	14:10:41	0.345509	1.53689	743.755	FALSE	0
2022-09-14	14:10:42	0.334771	1.48913	740.947	FALSE	0
2022-09-14	14:10:42	0.340675	1.51539	745.27	FALSE	0
2022-09-14	14:10:42	0.339809	1.51154	742.459	FALSE	0
2022-09-14	14:10:42	0.347646	1.5464	746.817	FALSE	0
2022-09-14	14:10:43	0.345458	1.53667	743.995	FALSE	0
2022-09-14	14:10:43	0.347494	1.54572	748.363	FALSE	0
2022-09-14	14:10:43	0.352837	1.56949	745.565	FALSE	0
2022-09-14	14:10:44	0.36042	1.60322	749.966	FALSE	0
2022-09-14	14:10:44	0.369987	1.64578	747.211	FALSE	0
2022-09-14	14:10:44	0.371158	1.65099	751.617	FALSE	0
2022-09-14	14:10:44	0.378333	1.6829	748.894	FALSE	0
2022-09-14	14:10:45	0.388308	1.72727	753.344	FALSE	0
2022-09-14	14:10:45	0.378995	1.68585	750.579	FALSE	0
2022-09-14	14:10:45	0.387036	1.72161	755.066	FALSE	0
2022-09-14	14:10:45	0.380216	1.69128	752.271	FALSE	0
2022-09-14	14:10:46	0.392532	1.74606	756.812	FALSE	0
2022-09-14	14:10:46	0.391514	1.74153	754.012	FALSE	0
2022-09-14	14:10:46	0.388766	1.72931	758.541	FALSE	0
2022-09-14	14:10:46	0.384593	1.71075	755.723	FALSE	0
2022-09-14	14:10:47	0.388257	1.72704	760.268	FALSE	0
2022-09-14	14:10:47	0.376756	1.67589	757.399	FALSE	0
2022-09-14	14:10:47	0.375687	1.67113	761.939	FALSE	0
2022-09-14	14:10:48	0.380064	1.6906	759.089	FALSE	0
2022-09-14	14:10:48	0.368308	1.63831	763.577	FALSE	0
2022-09-14	14:10:48	0.367494	1.63469	760.724	FALSE	0
2022-09-14	14:10:48	0.358232	1.59349	765.171	FALSE	0
2022-09-14	14:10:49	0.36444	1.6211	762.345	FALSE	0
2022-09-14	14:10:49	0.363931	1.61884	766.79	FALSE	0
2022-09-14	14:10:49	0.346272	1.54029	763.885	FALSE	0
2022-09-14	14:10:49	0.349071	1.55274	768.343	FALSE	0
2022-09-14	14:10:50	0.34271	1.52444	765.41	FALSE	0
2022-09-14	14:10:50	0.340878	1.51629	769.859	FALSE	0
2022-09-14	14:10:50	0.340369	1.51403	766.924	FALSE	0
2022-09-14	14:10:50	0.342252	1.52241	771.381	FALSE	0
2022-09-14	14:10:51	0.338079	1.50384	768.428	FALSE	0
2022-09-14	14:10:51	0.336247	1.49569	772.877	FALSE	0
2022-09-14	14:10:51	0.339809	1.51154	769.939	FALSE	0
2022-09-14	14:10:52	0.342812	1.5249	774.402	FALSE	0
2022-09-14	14:10:52	0.349631	1.55523	771.495	FALSE	0
2022-09-14	14:10:52	0.34841	1.5498	775.952	FALSE	0
2022-09-14	14:10:52	0.343677	1.52874	773.023	FALSE	0
2022-09-14	14:10:53	0.349428	1.55433	777.506	FALSE	0
2022-09-14	14:10:53	0.35299	1.57017	774.593	FALSE	0
2022-09-14	14:10:53	0.358181	1.59326	779.099	FALSE	0
2022-09-14	14:10:53	0.359402	1.59869	776.192	FALSE	0
2022-09-14	14:10:54	0.352939	1.56994	780.669	FALSE	0
2022-09-14	14:10:54	0.332227	1.47781	777.67	FALSE	0
2022-09-14	14:10:54	0.321031	1.42801	782.097	FALSE	0
2022-09-14	14:10:54	0.288817	1.28472	778.955	FALSE	0
2022-09-14	14:10:55	0.274771	1.22224	783.319	FALSE	0
2022-09-14	14:10:55	0.269631	1.19937	780.154	FALSE	0
2022-09-14	14:10:55	0.26327	1.17108	784.49	FALSE	0
2022-09-14	14:10:56	0.248054	1.10339	781.257	FALSE	0
2022-09-14	14:10:56	0.23813	1.05925	785.55	FALSE	0
2022-09-14	14:10:56	0.2307	1.0262	782.284	FALSE	0
2022-09-14	14:10:56	0.227392	1.01149	786.561	FALSE	0
2022-09-14	14:10:57	0.247494	1.1009	783.385	FALSE	0
2022-09-14	14:10:57	0.264288	1.17561	787.737	FALSE	0
2022-09-14	14:10:57	0.255433	1.13622	784.521	FALSE	0
2022-09-14	14:10:57	0.260929	1.16066	788.897	FALSE	0
2022-09-14	14:10:58	0.263779	1.17334	785.694	FALSE	0
2022-09-14	14:10:58	0.256959	1.14301	790.04	FALSE	0
2022-09-14	14:10:58	0.263677	1.17289	786.867	FALSE	0
2022-09-14	14:10:58	0.261132	1.16157	791.202	FALSE	0
2022-09-14	14:10:59	0.269377	1.19824	788.065	FALSE	0
2022-09-14	14:10:59	0.271005	1.20548	792.408	FALSE	0
2022-09-14	14:10:59	0.275585	1.22586	789.291	FALSE	0
2022-09-14	14:11:00	0.287494	1.27883	793.686	FALSE	0
2022-09-14	14:11:00	0.289886	1.28947	790.581	FALSE	0
2022-09-14	14:11:00	0.293855	1.30713	794.993	FALSE	0
2022-09-14	14:11:00	0.301998	1.34335	791.924	FALSE	0
2022-09-14	14:11:01	0.297875	1.32501	796.318	FALSE	0
2022-09-14	14:11:01	0.300267	1.33565	793.26	FALSE	0
2022-09-14	14:11:01	0.313397	1.39405	797.713	FALSE	0
2022-09-14	14:11:01	0.304695	1.35534	794.615	FALSE	0
2022-09-14	14:11:02	0.314109	1.39722	799.11	FALSE	0
2022-09-14	14:11:02	0.314873	1.40062	796.016	FALSE	0
2022-09-14	14:11:02	0.316247	1.40673	800.516	FALSE	0
2022-09-14	14:11:02	0.317366	1.41171	797.427	FALSE	0
2022-09-14	14:11:03	0.32673	1.45336	801.97	FALSE	0
2022-09-14	14:11:03	0.322099	1.43276	798.86	FALSE	0
2022-09-14	14:11:03	0.316501	1.40786	803.378	FALSE	0
2022-09-14	14:11:04	0.32098	1.42778	800.288	FALSE	0
2022-09-14	14:11:04	0.314364	1.39835	804.776	FALSE	0
2022-09-14	14:11:04	0.307901	1.36961	801.657	FALSE	0
2022-09-14	14:11:04	0.310395	1.3807	806.157	FALSE	0
2022-09-14	14:11:05	0.306272	1.36236	803.02	FALSE	0
2022-09-14	14:11:05	0.301031	1.33905	807.496	FALSE	0
2022-09-14	14:11:05	0.304542	1.35466	804.374	FALSE	0
2022-09-14	14:11:05	0.293804	1.3069	808.803	FALSE	0
2022-09-14	14:11:06	0.297265	1.32229	805.697	FALSE	0
2022-09-14	14:11:06	0.293244	1.30441	810.107	FALSE	0
2022-09-14	14:11:06	0.280115	1.24601	806.943	FALSE	0
2022-09-14	14:11:06	0.280064	1.24578	811.353	FALSE	0
2022-09-14	14:11:07	0.275076	1.22359	808.166	FALSE	0
2022-09-14	14:11:07	0.277621	1.23491	812.588	FALSE	0
2022-09-14	14:11:07	0.28098	1.24986	809.416	FALSE	0
2022-09-14	14:11:08	0.280267	1.24668	813.834	FALSE	0
2022-09-14	14:11:08	0.288766	1.28449	810.701	FALSE	0
2022-09-14	14:11:08	0.283117	1.25936	815.094	FALSE	0
2022-09-14	14:11:08	0.279504	1.24329	811.944	FALSE	0
2022-09-14	14:11:09	0.274059	1.21907	816.313	FALSE	0
2022-09-14	14:11:09	0.262048	1.16564	813.11	FALSE	0
2022-09-14	14:11:09	0.259809	1.15568	817.469	FALSE	0
2022-09-14	14:11:09	0.265611	1.18149	814.291	FALSE	0
2022-09-14	14:11:10	0.259097	1.15252	818.621	FALSE	0
2022-09-14	14:11:10	0.26383	1.17357	815.465	FALSE	0
2022-09-14	14:11:10	0.258588	1.15025	819.771	FALSE	0
2022-09-14	14:11:10	0.272226	1.21092	816.676	FALSE	0
2022-09-14	14:11:11	0.282099	1.25483	821.026	FALSE	0
2022-09-14	14:11:11	0.290598	1.29264	817.968	FALSE	0
2022-09-14	14:11:11	0.305916	1.36078	822.387	FALSE	0
2022-09-14	14:11:12	0.308512	1.37232	819.341	FALSE	0
2022-09-14	14:11:12	0.319555	1.42144	823.808	FALSE	0
2022-09-14	14:11:12	0.335789	1.49366	820.834	FALSE	0
2022-09-14	14:11:12	0.336349	1.49615	825.305	FALSE	0
2022-09-14	14:11:13	0.340675	1.51539	822.35	FALSE	0
2022-09-14	14:11:13	0.341285	1.5181	826.823	FALSE	0
2022-09-14	14:11:13	0.345814	1.53825	823.888	FALSE	0
2022-09-14	14:11:13	0.359555	1.59937	828.422	FALSE	0
2022-09-14	14:11:14	0.360115	1.60186	825.49	FALSE	0
2022-09-14	14:11:14	0.364339	1.62065	830.043	FALSE	0
2022-09-14	14:11:14	0.364339	1.62065	827.11	FALSE	0
2022-09-14	14:11:14	0.361743	1.60911	831.652	FALSE	0
2022-09-14	14:11:15	0.372277	1.65596	828.766	FALSE	0
2022-09-14	14:11:15	0.380929	1.69445	833.346	FALSE	0
2022-09-14	14:11:15	0.380929	1.69445	830.461	FALSE	0
2022-09-14	14:11:16	0.382557	1.70169	835.048	FALSE	0
2022-09-14	14:11:16	0.389529	1.7327	832.193	FALSE	0
2022-09-14	14:11:16	0.395076	1.75738	836.805	FALSE	0
2022-09-14	14:11:16	0.409173	1.82008	834.014	FALSE	0
2022-09-14	14:11:17	0.419758	1.86717	838.672	FALSE	0
2022-09-14	14:11:17	0.445611	1.98217	835.996	FALSE	0
2022-09-14	14:11:17	0.460115	2.04668	840.719	FALSE	0
2022-09-14	14:11:17	0.474466	2.11052	838.106	FALSE	0
2022-09-14	14:11:18	0.483677	2.15149	842.871	FALSE	0
2022-09-14	14:11:18	0.478435	2.12817	840.234	FALSE	0
2022-09-14	14:11:18	0.532379	2.36813	845.239	FALSE	0
2022-09-14	14:11:18	0.51187	2.2769	842.511	FALSE	0
2022-09-14	14:11:19	0.488206	2.17164	847.41	FALSE	0
2022-09-14	14:11:19	0.458333	2.03876	844.55	FALSE	0
2022-09-14	14:11:19	0.437774	1.94731	849.358	FALSE	0
2022-09-14	14:11:20	0.451972	2.01046	846.561	FALSE	0
2022-09-14	14:11:20	0.454975	2.02382	851.382	FALSE	0
2022-09-14	14:11:20	0.437977	1.94821	848.509	FALSE	0
2022-09-14	14:11:20	0.384491	1.71029	853.092	FALSE	0
2022-09-14	14:11:21	0.430089	1.91312	850.422	FALSE	0
2022-09-14	14:11:21	0.43528	1.93621	855.028	FALSE	0
2022-09-14	14:11:21	0.446272	1.98511	852.407	FALSE	0
2022-09-14	14:11:21	0.442863	1.96994	856.998	FALSE	0
2022-09-14	14:11:22	0.41243	1.83457	854.242	FALSE	0
2022-09-14	14:11:22	0.137672	0.612393	857.61	FALSE	0
2022-09-14	14:11:22	0.434568	1.93305	856.175	FALSE	0
2022-09-14	14:11:22	0.28215	1.25506	858.865	FALSE	0
2022-09-14	14:11:23	-0.221819	-0.986695	856.175	FALSE	0
2022-09-14	14:11:23	0.365662	1.62654	860.492	FALSE	0
2022-09-14	14:11:23	0.386222	1.71799	857.893	FALSE	0
2022-09-14	14:11:24	0.742506	3.30282	863.795	FALSE	0
2022-09-14	14:11:24	0.730445	3.24917	861.142	FALSE	0
2022-09-14	14:11:24	0.729326	3.24419	867.039	FALSE	0
2022-09-14	14:11:24	0.73874	3.28606	864.428	FALSE	0
2022-09-14	14:11:25	0.732074	3.25641	870.295	FALSE	0
2022-09-14	14:11:25	0.73645	3.27588	867.704	FALSE	0
2022-09-14	14:11:25	0.734618	3.26773	873.563	FALSE	0
2022-09-14	14:11:25	0.736807	3.27746	870.981	FALSE	0
2022-09-14	14:11:26	0.737214	3.27928	876.842	FALSE	0
2022-09-14	14:11:26	0.740064	3.29195	874.273	FALSE	0
2022-09-14	14:11:26	0.738181	3.28358	880.126	FALSE	0
2022-09-14	14:11:26	0.73472	3.26818	877.541	FALSE	0
2022-09-14	14:11:27	0.728919	3.24238	883.368	FALSE	0
2022-09-14	14:11:27	0.73355	3.26298	880.804	FALSE	0
2022-09-14	14:11:27	0.731209	3.25256	886.621	FALSE	0
2022-09-14	14:11:28	0.684491	3.04475	883.849	FALSE	0
2022-09-14	14:11:28	0.723219	3.21702	889.838	FALSE	0
2022-09-14	14:11:28	0.72103	3.20729	887.056	FALSE	0
2022-09-14	14:11:28	0.716908	3.18895	893.027	FALSE	0
2022-09-14	14:11:29	0.729987	3.24713	890.303	FALSE	0
2022-09-14	14:11:29	0.724135	3.2211	896.248	FALSE	0
2022-09-14	14:11:29	0.730191	3.24804	893.551	FALSE	0
2022-09-14	14:11:29	0.722761	3.21499	899.463	FALSE	0
2022-09-14	14:11:30	0.730293	3.24849	896.8	FALSE	0
2022-09-14	14:11:30	0.730445	3.24917	902.712	FALSE	0
2022-09-14	14:11:30	0.732939	3.26026	900.06	FALSE	0
2022-09-14	14:11:30	0.722659	3.21453	905.927	FALSE	0
2022-09-14	14:11:31	0.722608	3.2143	903.274	FALSE	0
2022-09-14	14:11:31	0.727188	3.23468	909.161	FALSE	0
2022-09-14	14:11:31	0.73014	3.24781	906.522	FALSE	0
2022-09-14	14:11:32	0.727188	3.23468	912.396	FALSE	0
2022-09-14	14:11:32	0.72841	3.24011	909.762	FALSE	0
2022-09-14	14:11:32	0.733804	3.26411	915.66	FALSE	0
2022-09-14	14:11:32	0.723677	3.21906	912.981	FALSE	0
2022-09-14	14:11:33	0.73243	3.258	918.918	FALSE	0
2022-09-14	14:11:33	0.726425	3.23128	916.213	FALSE	0
2022-09-14	14:11:33	0.729071	3.24305	922.161	FALSE	0
2022-09-14	14:11:33	0.727952	3.23808	919.451	FALSE	0
2022-09-14	14:11:34	0.725153	3.22563	925.387	FALSE	0
2022-09-14	14:11:34	0.730038	3.24736	922.698	FALSE	0
2022-09-14	14:11:34	0.720369	3.20435	928.591	FALSE	0
2022-09-14	14:11:34	0.736094	3.27429	925.972	FALSE	0
2022-09-14	14:11:35	0.725509	3.22721	931.818	FALSE	0
2022-09-14	14:11:35	0.730954	3.25143	929.224	FALSE	0
2022-09-14	14:11:35	0.733702	3.26365	935.082	FALSE	0
2022-09-14	14:11:36	0.723982	3.22042	932.444	FALSE	0
2022-09-14	14:11:36	0.729071	3.24305	938.325	FALSE	0
2022-09-14	14:11:36	0.728613	3.24102	935.685	FALSE	0
2022-09-14	14:11:36	0.730649	3.25007	941.575	FALSE	0
2022-09-14	14:11:37	0.726883	3.23332	938.919	FALSE	0
2022-09-14	14:11:37	0.731667	3.2546	944.83	FALSE	0
2022-09-14	14:11:37	0.725763	3.22834	942.147	FALSE	0
2022-09-14	14:11:37	0.730852	3.25098	948.081	FALSE	0
2022-09-14	14:11:38	0.508054	2.25993	944.407	FALSE	0
2022-09-14	14:11:38	0.574924	2.55738	950.638	FALSE	0
2022-09-14	14:11:38	0.686018	3.05155	947.458	FALSE	0
2022-09-14	14:11:38	0.734262	3.26614	953.904	FALSE	0
2022-09-14	14:11:39	0.732125	3.25664	950.715	FALSE	0
2022-09-14	14:11:39	0.740573	3.29422	957.198	FALSE	0
2022-09-14	14:11:39	0.737773	3.28176	953.997	FALSE	0
2022-09-14	14:11:40	0.731209	3.25256	960.451	FALSE	0
2022-09-14	14:11:40	0.737315	3.27972	957.277	FALSE	0
2022-09-14	14:11:40	0.737926	3.28244	963.733	FALSE	0
2022-09-14	14:11:40	0.726374	3.23106	960.508	FALSE	0
2022-09-14	14:11:41	0.734415	3.26682	967	FALSE	0
2022-09-14	14:11:41	0.73243	3.258	963.766	FALSE	0
2022-09-14	14:11:41	0.732023	3.25618	970.256	FALSE	0
2022-09-14	14:11:41	0.728461	3.24034	967.006	FALSE	0
2022-09-14	14:11:42	0.731005	3.25166	973.508	FALSE	0
2022-09-14	14:11:42	0.726679	3.23241	970.238	FALSE	0
2022-09-14	14:11:42	0.725712	3.22811	976.736	FALSE	0
2022-09-14	14:11:42	0.734364	3.2666	973.505	FALSE	0
2022-09-14	14:11:43	0.736908	3.27791	980.014	FALSE	0
2022-09-14	14:11:43	0.735941	3.27361	976.779	FALSE	0
2022-09-14	14:11:43	0.731412	3.25347	983.268	FALSE	0
2022-09-14	14:11:44	0.732175	3.25686	980.035	FALSE	0
2022-09-14	14:11:44	0.732328	3.25754	986.525	FALSE	0
2022-09-14	14:11:44	0.734517	3.26728	983.303	FALSE	0
2022-09-14	14:11:44	0.732888	3.26003	989.785	FALSE	0
2022-09-14	14:11:45	0.737417	3.28018	986.583	FALSE	0
2022-09-14	14:11:45	0.725305	3.2263	993.012	FALSE	0
2022-09-14	14:11:45	0.736552	3.27633	989.859	FALSE	0
2022-09-14	14:11:45	0.733906	3.26456	996.276	FALSE	0
2022-09-14	14:11:46	0.734568	3.26751	993.127	FALSE	0
2022-09-14	14:11:46	0.732583	3.25868	999.535	FALSE	0
2022-09-14	14:11:46	0.729936	3.2469	996.374	FALSE	0
2022-09-14	14:11:46	0.734466	3.26705	1002.8	FALSE	0
2022-09-14	14:11:47	0.732939	3.26026	999.634	FALSE	0
2022-09-14	14:11:47	0.733601	3.2632	1006.07	FALSE	0
2022-09-14	14:11:47	0.734517	3.26728	1002.9	FALSE	0
2022-09-14	14:11:48	0.734771	3.26841	1009.33	FALSE	0
2022-09-14	14:11:48	0.729428	3.24464	1006.15	FALSE	0
2022-09-14	14:11:48	0.72556	3.22744	1012.56	FALSE	0
2022-09-14	14:11:48	0.734924	3.26909	1009.41	FALSE	0
2022-09-14	14:11:49	0.730089	3.24758	1015.81	FALSE	0
2022-09-14	14:11:49	0.73416	3.26569	1012.68	FALSE	0
2022-09-14	14:11:49	0.734313	3.26637	1019.07	FALSE	0
2022-09-14	14:11:49	0.73243	3.258	1015.94	FALSE	0
2022-09-14	14:11:50	0.7307	3.2503	1022.33	FALSE	0
2022-09-14	14:11:50	0.740318	3.29308	1019.23	FALSE	0
2022-09-14	14:11:50	0.733957	3.26479	1025.59	FALSE	0
2022-09-14	14:11:50	0.733651	3.26343	1022.5	FALSE	0
2022-09-14	14:11:51	0.73299	3.26049	1028.85	FALSE	0
2022-09-14	14:11:51	0.732481	3.25822	1025.75	FALSE	0
2022-09-14	14:11:51	0.736349	3.27543	1032.13	FALSE	0
2022-09-14	14:11:52	0.735026	3.26954	1029.02	FALSE	0
2022-09-14	14:11:52	0.732277	3.25731	1035.38	FALSE	0
2022-09-14	14:11:52	0.733601	3.2632	1032.29	FALSE	0
2022-09-14	14:11:52	0.737061	3.27859	1038.66	FALSE	0
2022-09-14	14:11:53	0.736349	3.27543	1035.56	FALSE	0
2022-09-14	14:11:53	0.739046	3.28742	1041.95	FALSE	0
2022-09-14	14:11:53	0.723372	3.2177	1038.78	FALSE	0
2022-09-14	14:11:53	0.738282	3.28403	1045.23	FALSE	0
2022-09-14	14:11:54	0.727952	3.23808	1042.02	FALSE	0
2022-09-14	14:11:54	0.727646	3.23671	1048.47	FALSE	0
2022-09-14	14:11:54	0.732328	3.25754	1045.27	FALSE	0
2022-09-14	14:11:54	0.73472	3.26818	1051.74	FALSE	0
2022-09-14	14:11:55	0.729224	3.24373	1048.52	FALSE	0
2022-09-14	14:11:55	0.731819	3.25528	1054.99	FALSE	0
2022-09-14	14:11:55	0.735738	3.27271	1051.79	FALSE	0
2022-09-14	14:11:56	0.726934	3.23355	1058.23	FALSE	0
2022-09-14	14:11:56	0.731412	3.25347	1055.04	FALSE	0
2022-09-14	14:11:56	0.732277	3.25731	1061.48	FALSE	0
2022-09-14	14:11:56	0.733193	3.26139	1058.31	FALSE	0
2022-09-14	14:11:57	0.737621	3.28109	1064.77	FALSE	0
2022-09-14	14:11:57	0.73528	3.27067	1061.58	FALSE	0
2022-09-14	14:11:57	0.729886	3.24668	1068.01	FALSE	0
2022-09-14	14:11:57	0.732125	3.25664	1064.83	FALSE	0
2022-09-14	14:11:58	0.734517	3.26728	1071.28	FALSE	0
2022-09-14	14:11:58	0.733499	3.26275	1068.1	FALSE	0
2022-09-14	14:11:58	0.727901	3.23785	1074.52	FALSE	0
2022-09-14	14:11:58	0.732481	3.25822	1071.35	FALSE	0
2022-09-14	14:11:59	0.729631	3.24554	1077.76	FALSE	0
2022-09-14	14:11:59	0.737672	3.28131	1074.64	FALSE	0
2022-09-14	14:11:59	0.730394	3.24894	1081.01	FALSE	0
2022-09-14	14:12:00	0.735738	3.27271	1077.91	FALSE	0
2022-09-14	14:12:00	0.726425	3.23128	1084.24	FALSE	0
2022-09-14	14:12:00	0.732837	3.25981	1081.17	FALSE	0
2022-09-14	14:12:00	0.734924	3.26909	1087.51	FALSE	0
2022-09-14	14:12:01	0.728613	3.24102	1084.41	FALSE	0
2022-09-14	14:12:01	0.734466	3.26705	1090.78	FALSE	0
2022-09-14	14:12:01	0.72958	3.24532	1087.65	FALSE	0
2022-09-14	14:12:01	0.731819	3.25528	1094.03	FALSE	0
2022-09-14	14:12:02	0.731616	3.25437	1090.91	FALSE	0
2022-09-14	14:12:02	0.736298	3.2752	1097.31	FALSE	0
2022-09-14	14:12:02	0.728919	3.24238	1094.15	FALSE	0
2022-09-14	14:12:02	0.737773	3.28176	1100.59	FALSE	0
2022-09-14	14:12:03	0.730191	3.24804	1097.4	FALSE	0
2022-09-14	14:12:03	0.730751	3.25053	1103.84	FALSE	0
2022-09-14	14:12:03	0.7307	3.2503	1100.65	FALSE	0
2022-09-14	14:12:04	0.735992	3.27384	1107.12	FALSE	0
2022-09-14	14:12:04	0.7393	3.28855	1103.94	FALSE	0
2022-09-14	14:12:04	0.734313	3.26637	1110.38	FALSE	0
2022-09-14	14:12:04	0.736857	3.27769	1107.22	FALSE	0
2022-09-14	14:12:05	0.732634	3.2589	1113.64	FALSE	0
2022-09-14	14:12:05	0.734211	3.26592	1110.48	FALSE	0
2022-09-14	14:12:05	0.723422	3.21793	1116.86	FALSE	0
2022-09-14	14:12:05	0.729224	3.24373	1113.73	FALSE	0
2022-09-14	14:12:06	0.732684	3.25912	1120.12	FALSE	0
2022-09-14	14:12:06	0.736552	3.27633	1117	FALSE	0
2022-09-14	14:12:06	0.735738	3.27271	1123.39	FALSE	0
2022-09-14	14:12:06	0.739046	3.28742	1120.29	FALSE	0
2022-09-14	14:12:07	0.738486	3.28493	1126.68	FALSE	0
2022-09-14	14:12:07	0.72383	3.21974	1123.51	FALSE	0
2022-09-14	14:12:07	0.735891	3.27339	1129.95	FALSE	0
2022-09-14	14:12:08	0.732226	3.25709	1126.77	FALSE	0
2022-09-14	14:12:08	0.588511	2.61781	1132.57	FALSE	0
2022-09-14	14:12:08	0.448053	1.99303	1128.76	FALSE	0
2022-09-14	14:12:08	0.446985	1.98828	1134.56	FALSE	0
2022-09-14	14:12:09	0.228359	1.01579	1129.77	FALSE	0
2022-09-14	14:12:09	0.313295	1.3936	1135.95	FALSE	0
2022-09-14	14:12:09	0.737926	3.28244	1133.06	FALSE	0
2022-09-14	14:12:09	0.732481	3.25822	1139.21	FALSE	0
2022-09-14	14:12:10	0.734262	3.26614	1136.32	FALSE	0
2022-09-14	14:12:10	0.731463	3.25369	1142.46	FALSE	0
2022-09-14	14:12:10	0.622913	2.77084	1139.09	FALSE	0
2022-09-14	14:12:10	0.569479	2.53316	1144.99	FALSE	0
2022-09-14	14:12:11	0.563931	2.50848	1141.6	FALSE	0
2022-09-14	14:12:11	0.412786	1.83615	1146.83	FALSE	0
2022-09-14	14:12:11	0.356807	1.58715	1143.19	FALSE	0
2022-09-14	14:12:12	0.199708	0.888341	1147.72	FALSE	0
2022-09-14	14:12:12	0.204644	0.910297	1144.1	FALSE	0
2022-09-14	14:12:12	0.215585	0.958965	1148.68	FALSE	0
2022-09-14	14:12:12	0.212939	0.947195	1145.05	FALSE	0
2022-09-14	14:12:13	0.215178	0.957155	1149.63	FALSE	0
2022-09-14	14:12:13	0.534771	2.37877	1147.43	FALSE	0
2022-09-14	14:12:13	0.739046	3.28742	1152.92	FALSE	0
2022-09-14	14:12:13	0.734517	3.26728	1150.69	FALSE	0
2022-09-14	14:12:14	0.737672	3.28131	1156.2	FALSE	0
2022-09-14	14:12:14	0.733702	3.26365	1153.96	FALSE	0
2022-09-14	14:12:14	0.734313	3.26637	1159.47	FALSE	0
2022-09-14	14:12:14	0.734059	3.26524	1157.22	FALSE	0
2022-09-14	14:12:15	0.730496	3.24939	1162.72	FALSE	0
2022-09-14	14:12:15	0.731717	3.25482	1160.48	FALSE	0
2022-09-14	14:12:15	0.732786	3.25958	1165.98	FALSE	0
2022-09-14	14:12:16	0.728359	3.23989	1163.72	FALSE	0
2022-09-14	14:12:16	0.736298	3.2752	1169.25	FALSE	0
2022-09-14	14:12:16	0.729377	3.24441	1166.96	FALSE	0
2022-09-14	14:12:16	0.733702	3.26365	1172.52	FALSE	0
2022-09-14	14:12:17	0.731412	3.25347	1170.22	FALSE	0
2022-09-14	14:12:17	0.732837	3.25981	1175.78	FALSE	0
2022-09-14	14:12:17	0.733295	3.26184	1173.48	FALSE	0
2022-09-14	14:12:17	0.73014	3.24781	1179.02	FALSE	0
2022-09-14	14:12:18	0.734262	3.26614	1176.74	FALSE	0
2022-09-14	14:12:18	0.730598	3.24985	1182.27	FALSE	0
2022-09-14	14:12:18	0.729784	3.24623	1179.99	FALSE	0
2022-09-14	14:12:18	0.735789	3.27294	1185.55	FALSE	0
2022-09-14	14:12:19	0.731209	3.25256	1183.24	FALSE	0
2022-09-14	14:12:19	0.73528	3.27067	1188.82	FALSE	0
2022-09-14	14:12:19	0.730343	3.24871	1186.49	FALSE	0
2022-09-14	14:12:20	0.735178	3.27022	1192.09	FALSE	0
2022-09-14	14:12:20	0.733957	3.26479	1189.76	FALSE	0
2022-09-14	14:12:20	0.725865	3.22879	1195.32	FALSE	0
2022-09-14	14:12:20	0.735534	3.2718	1193.03	FALSE	0
2022-09-14	14:12:21	0.733702	3.26365	1198.58	FALSE	0
2022-09-14	14:12:21	0.734517	3.26728	1196.29	FALSE	0
2022-09-14	14:12:21	0.726374	3.23106	1201.81	FALSE	0
2022-09-14	14:12:21	0.736349	3.27543	1199.57	FALSE	0
2022-09-14	14:12:22	0.735076	3.26977	1205.08	FALSE	0
2022-09-14	14:12:22	0.730242	3.24826	1202.82	FALSE	0
2022-09-14	14:12:22	0.731819	3.25528	1208.34	FALSE	0
2022-09-14	14:12:22	0.732226	3.25709	1206.08	FALSE	0
2022-09-14	14:12:23	0.73472	3.26818	1211.61	FALSE	0
2022-09-14	14:12:23	0.731565	3.25415	1209.33	FALSE	0
2022-09-14	14:12:23	0.731921	3.25573	1214.86	FALSE	0
2022-09-14	14:12:24	0.741387	3.29784	1212.63	FALSE	0
2022-09-14	14:12:24	0.732532	3.25845	1218.12	FALSE	0
2022-09-14	14:12:24	0.743219	3.30599	1215.93	FALSE	0
2022-09-14	14:12:24	0.634466	2.82223	1220.94	FALSE	0
2022-09-14	14:12:25	0.732074	3.25641	1219.19	FALSE	0
2022-09-14	14:12:25	0.736959	3.27814	1224.22	FALSE	0
2022-09-14	14:12:25	0.73131	3.25301	1222.44	FALSE	0
2022-09-14	14:12:25	0.727494	3.23604	1227.46	FALSE	0
2022-09-14	14:12:26	0.735076	3.26977	1225.71	FALSE	0
2022-09-14	14:12:26	0.725916	3.22902	1230.68	FALSE	0
2022-09-14	14:12:26	0.711616	3.16541	1228.88	FALSE	0
2022-09-14	14:12:26	0.88785	3.94933	1234.63	FALSE	0
2022-09-14	14:12:27	-0.170572	-0.758738	1228.88	FALSE	0
2022-09-14	14:12:27	0.74042	3.29354	1237.93	FALSE	0
2022-09-14	14:12:27	1.1049	4.91482	1233.79	FALSE	0
2022-09-14	14:12:28	0.289071	1.28585	1239.21	FALSE	0
2022-09-14	14:12:28	0.0807254	0.359083	1234.15	FALSE	0
2022-09-14	14:12:28	0.358588	1.59507	1240.81	FALSE	0
2022-09-14	14:12:28	0.111362	0.49536	1234.65	FALSE	0
2022-09-14	14:12:29	0.302557	1.34583	1242.15	FALSE	0
2022-09-14	14:12:29	0.739249	3.28833	1237.94	FALSE	0
2022-09-14	14:12:29	0.7307	3.2503	1245.4	FALSE	0
2022-09-14	14:12:29	0.726629	3.23219	1241.17	FALSE	0
2022-09-14	14:12:30	0.724644	3.22336	1248.63	FALSE	0
2022-09-14	14:12:30	0.737417	3.28018	1244.45	FALSE	0
2022-09-14	14:12:30	0.74098	3.29603	1251.92	FALSE	0
2022-09-14	14:12:30	0.733855	3.26433	1247.71	FALSE	0
2022-09-14	14:12:31	0.741947	3.30033	1255.22	FALSE	0
2022-09-14	14:12:31	0.733397	3.2623	1250.97	FALSE	0
2022-09-14	14:12:31	0.735076	3.26977	1258.49	FALSE	0
2022-09-14	14:12:32	0.729682	3.24577	1254.22	FALSE	0
2022-09-14	14:12:32	0.728104	3.23875	1261.73	FALSE	0
2022-09-14	14:12:32	0.735382	3.27113	1257.49	FALSE	0
2022-09-14	14:12:32	0.732379	3.25777	1264.99	FALSE	0
2022-09-14	14:12:33	0.73528	3.27067	1260.76	FALSE	0
2022-09-14	14:12:33	0.675432	3.00446	1268	FALSE	0
2022-09-14	14:12:33	0.73874	3.28606	1264.05	FALSE	0
2022-09-14	14:12:33	0.740216	3.29263	1271.29	FALSE	0
2022-09-14	14:12:34	0.736552	3.27633	1267.32	FALSE	0
2022-09-14	14:12:34	0.738079	3.28312	1274.57	FALSE	0
2022-09-14	14:12:34	0.726221	3.23038	1270.55	FALSE	0
2022-09-14	14:12:34	0.727036	3.234	1277.81	FALSE	0
2022-09-14	14:12:35	0.732888	3.26003	1273.81	FALSE	0
2022-09-14	14:12:35	0.738537	3.28516	1281.09	FALSE	0
2022-09-14	14:12:35	0.730496	3.24939	1277.06	FALSE	0
2022-09-14	14:12:36	0.435076	1.93531	1283.03	FALSE	0
2022-09-14	14:12:36	0.733448	3.26252	1280.33	FALSE	0
2022-09-14	14:12:36	0.731972	3.25596	1286.28	FALSE	0
2022-09-14	14:12:36	0.73874	3.28606	1283.61	FALSE	0
2022-09-14	14:12:37	0.728562	3.24079	1289.52	FALSE	0
2022-09-14	14:12:37	0.729529	3.24509	1286.86	FALSE	0
2022-09-14	14:12:37	0.781845	3.4778	1293	FALSE	0
2022-09-14	14:12:37	0.730293	3.24849	1290.11	FALSE	0
2022-09-14	14:12:38	0.731514	3.25392	1296.25	FALSE	0
2022-09-14	14:12:38	0.730852	3.25098	1293.36	FALSE	0
2022-09-14	14:12:38	0.732684	3.25912	1299.51	FALSE	0
2022-09-14	14:12:38	0.733193	3.26139	1296.62	FALSE	0
2022-09-14	14:12:39	0.730242	3.24826	1302.76	FALSE	0
2022-09-14	14:12:39	0.727646	3.23671	1299.86	FALSE	0
2022-09-14	14:12:39	0.72612	3.22993	1305.99	FALSE	0
2022-09-14	14:12:40	0.729122	3.24328	1303.1	FALSE	0
2022-09-14	14:12:40	0.734415	3.26682	1309.26	FALSE	0
2022-09-14	14:12:40	0.71645	3.18691	1306.29	FALSE	0
2022-09-14	14:12:40	0.737875	3.28222	1312.54	FALSE	0
2022-09-14	14:12:41	0.731819	3.25528	1309.54	FALSE	0
2022-09-14	14:12:41	0.731209	3.25256	1315.79	FALSE	0
2022-09-14	14:12:41	0.730852	3.25098	1312.79	FALSE	0
2022-09-14	14:12:41	0.732277	3.25731	1319.05	FALSE	0
2022-09-14	14:12:42	0.731921	3.25573	1316.05	FALSE	0
2022-09-14	14:12:42	0.730598	3.24985	1322.3	FALSE	0
2022-09-14	14:12:42	0.732634	3.2589	1319.31	FALSE	0
2022-09-14	14:12:42	0.735891	3.27339	1325.57	FALSE	0
2022-09-14	14:12:43	0.734008	3.26501	1322.57	FALSE	0
2022-09-14	14:12:43	0.734415	3.26682	1328.84	FALSE	0
2022-09-14	14:12:43	0.737315	3.27972	1325.85	FALSE	0
2022-09-14	14:12:44	0.710496	3.16043	1332	FALSE	0
2022-09-14	14:12:44	0.727392	3.23559	1329.09	FALSE	0
2022-09-14	14:12:44	0.688919	3.06445	1335.07	FALSE	0
2022-09-14	14:12:44	0.680013	3.02483	1332.11	FALSE	0
2022-09-14	14:12:45	0.683575	3.04068	1338.11	FALSE	0
2022-09-14	14:12:45	0.688359	3.06196	1335.17	FALSE	0
2022-09-14	14:12:45	0.679962	3.02461	1341.13	FALSE	0
2022-09-14	14:12:45	0.689478	3.06694	1338.24	FALSE	0
2022-09-14	14:12:46	0.700776	3.11719	1344.25	FALSE	0
2022-09-14	14:12:46	0.687443	3.05788	1341.3	FALSE	0
2022-09-14	14:12:46	0.729936	3.2469	1347.49	FALSE	0
2022-09-14	14:12:46	0.731972	3.25596	1344.55	FALSE	0
2022-09-14	14:12:47	0.723626	3.21883	1350.71	FALSE	0
2022-09-14	14:12:47	0.729936	3.2469	1347.8	FALSE	0
2022-09-14	14:12:47	0.740064	3.29195	1354.01	FALSE	0
2022-09-14	14:12:48	0.734975	3.26932	1351.07	FALSE	0
2022-09-14	14:12:48	0.735229	3.27045	1357.28	FALSE	0
2022-09-14	14:12:48	0.734008	3.26501	1354.34	FALSE	0
2022-09-14	14:12:48	0.72729	3.23513	1360.51	FALSE	0
2022-09-14	14:12:49	0.731717	3.25482	1357.59	FALSE	0
2022-09-14	14:12:49	0.70729	3.14617	1363.66	FALSE	0
2022-09-14	14:12:49	0.731259	3.25279	1360.84	FALSE	0
2022-09-14	14:12:49	0.735229	3.27045	1366.93	FALSE	0
2022-09-14	14:12:50	0.728664	3.24124	1364.08	FALSE	0
2022-09-14	14:12:50	0.729936	3.2469	1370.17	FALSE	0
2022-09-14	14:12:50	0.732837	3.25981	1367.34	FALSE	0
2022-09-14	14:12:50	0.726985	3.23377	1373.41	FALSE	0
2022-09-14	14:12:51	0.736603	3.27656	1370.62	FALSE	0
2022-09-14	14:12:51	0.726527	3.23174	1376.64	FALSE	0
2022-09-14	14:12:51	0.728868	3.24215	1373.86	FALSE	0
2022-09-14	14:12:52	0.730496	3.24939	1379.89	FALSE	0
2022-09-14	14:12:52	0.733142	3.26116	1377.12	FALSE	0
2022-09-14	14:12:52	0.730089	3.24758	1383.14	FALSE	0
2022-09-14	14:12:52	0.730649	3.25007	1380.37	FALSE	0
2022-09-14	14:12:53	0.729224	3.24373	1386.38	FALSE	0
2022-09-14	14:12:53	0.730343	3.24871	1383.62	FALSE	0
2022-09-14	14:12:53	0.734109	3.26546	1389.65	FALSE	0
2022-09-14	14:12:53	0.733041	3.26071	1386.88	FALSE	0
2022-09-14	14:12:54	0.733702	3.26365	1392.91	FALSE	0
2022-09-14	14:12:54	0.733651	3.26343	1390.15	FALSE	0
2022-09-14	14:12:54	0.734364	3.2666	1396.18	FALSE	0
2022-09-14	14:12:54	0.73131	3.25301	1393.4	FALSE	0
2022-09-14	14:12:55	0.733092	3.26094	1399.44	FALSE	0
2022-09-14	14:12:55	0.737519	3.28063	1396.68	FALSE	0
2022-09-14	14:12:55	0.733142	3.26116	1402.7	FALSE	0

## Sheet: Ursula_prong_202291414738 (2)
Date	Time	Lbs	Total force x time			**GoPro Fitting: 13:56
2022-09-14	14:07:38	0.723779	0.723779	FALSE	0
2022-09-14	14:07:38	0.662354	1.38613	FALSE	0
2022-09-14	14:07:38	0.571565	1.9577	FALSE	0
2022-09-14	14:07:39	0.425916	2.38361	FALSE	0
2022-09-14	14:07:39	0.360115	2.74373	FALSE	0
2022-09-14	14:07:39	0.412786	3.15652	FALSE	0
2022-09-14	14:07:40	0.733702	3.89022	FALSE	0
2022-09-14	14:07:40	0.728766	4.61898	FALSE	0
2022-09-14	14:07:40	0.728613	5.3476	FALSE	0
2022-09-14	14:07:40	0.73584	6.08344	FALSE	0
2022-09-14	14:07:41	0.734771	6.81821	FALSE	0
2022-09-14	14:07:41	0.734211	7.55242	FALSE	0
2022-09-14	14:07:41	0.726527	8.27895	FALSE	0
2022-09-14	14:07:41	0.734109	9.01305	FALSE	0
2022-09-14	14:07:42	0.736043	9.7491	FALSE	0
2022-09-14	14:07:42	0.735229	10.4843	FALSE	0
2022-09-14	14:07:42	0.734059	11.2184	FALSE	0
2022-09-14	14:07:42	0.73187	11.9503	FALSE	0
2022-09-14	14:07:43	0.73701	12.6873	FALSE	0
2022-09-14	14:07:43	0.729886	13.4172	FALSE	0
2022-09-14	14:07:43	0.734771	14.1519	FALSE	0
2022-09-14	14:07:44	0.735585	14.8875	FALSE	0
2022-09-14	14:07:44	0.732277	15.6198	FALSE	0
2022-09-14	14:07:44	0.731972	16.3518	FALSE	0
2022-09-14	14:07:44	0.727137	17.0789	FALSE	0
2022-09-14	14:07:45	0.735076	17.814	FALSE	0
2022-09-14	14:07:45	0.729275	18.5432	FALSE	0
2022-09-14	14:07:45	0.734975	19.2782	FALSE	0
2022-09-14	14:07:45	0.734975	20.0132	FALSE	0
2022-09-14	14:07:46	0.733702	20.7469	FALSE	0
2022-09-14	14:07:46	0.736145	21.483	FALSE	0
2022-09-14	14:07:46	0.732837	22.2159	FALSE	0
2022-09-14	14:07:47	0.736959	22.9528	FALSE	0
2022-09-14	14:07:47	0.732786	23.6856	FALSE	0
2022-09-14	14:07:47	0.733041	24.4187	FALSE	0
2022-09-14	14:07:47	0.735483	25.1541	FALSE	0
2022-09-14	14:07:48	0.735229	25.8894	FALSE	0
2022-09-14	14:07:48	0.731361	26.6207	FALSE	0
2022-09-14	14:07:48	0.734008	27.3547	FALSE	0
2022-09-14	14:07:48	0.735738	28.0905	FALSE	0
2022-09-14	14:07:49	0.733601	28.8241	FALSE	0
2022-09-14	14:07:49	0.730852	29.5549	FALSE	0
2022-09-14	14:07:49	0.728512	30.2834	FALSE	0
2022-09-14	14:07:49	0.733753	31.0172	FALSE	0
2022-09-14	14:07:50	0.737722	31.7549	FALSE	0
2022-09-14	14:07:50	0.733295	32.4882	FALSE	0
2022-09-14	14:07:50	0.73472	33.2229	FALSE	0
2022-09-14	14:07:50	0.726832	33.9498	FALSE	0
2022-09-14	14:07:51	0.736603	34.6864	FALSE	0
2022-09-14	14:07:51	0.731768	35.4181	FALSE	0
2022-09-14	14:07:51	0.735585	36.1537	FALSE	0
2022-09-14	14:07:52	0.734517	36.8882	FALSE	0
2022-09-14	14:07:52	0.7393	37.6275	FALSE	0
2022-09-14	14:07:52	0.730038	38.3576	FALSE	0
2022-09-14	14:07:52	0.730242	39.0878	FALSE	0
2022-09-14	14:07:53	0.732023	39.8198	FALSE	0
2022-09-14	14:07:53	0.73813	40.558	FALSE	0
2022-09-14	14:07:53	0.734568	41.2925	FALSE	0
2022-09-14	14:07:53	0.736857	42.0294	FALSE	0
2022-09-14	14:07:54	0.730038	42.7594	FALSE	0
2022-09-14	14:07:54	0.730954	43.4904	FALSE	0
2022-09-14	14:07:54	0.736094	44.2265	FALSE	0
2022-09-14	14:07:54	0.732379	44.9589	FALSE	0
2022-09-14	14:07:55	0.736145	45.695	FALSE	0
2022-09-14	14:07:55	0.731514	46.4265	FALSE	0
2022-09-14	14:07:55	0.741336	47.1679	FALSE	0
2022-09-14	14:07:56	0.73355	47.9014	FALSE	0
2022-09-14	14:07:56	0.730191	48.6316	FALSE	0
2022-09-14	14:07:56	0.733855	49.3655	FALSE	0
2022-09-14	14:07:56	0.735127	50.1006	FALSE	0
2022-09-14	14:07:57	0.734262	50.8348	FALSE	0
2022-09-14	14:07:57	0.733753	51.5686	FALSE	0
2022-09-14	14:07:57	0.736603	52.3052	FALSE	0
2022-09-14	14:07:57	0.726679	53.0319	FALSE	0
2022-09-14	14:07:58	0.737061	53.7689	FALSE	0
2022-09-14	14:07:58	0.724084	54.493	FALSE	0
2022-09-14	14:07:58	0.733295	55.2263	FALSE	0
2022-09-14	14:07:58	0.736196	55.9625	FALSE	0
2022-09-14	14:07:59	0.856857	56.8194	FALSE	0
2022-09-14	14:07:59	0.737875	57.5572	FALSE	0
2022-09-14	14:07:59	0.73472	58.292	FALSE	0
2022-09-14	14:08:00	0.733499	59.0255	FALSE	0
2022-09-14	14:08:00	0.73243	59.7579	FALSE	0
2022-09-14	14:08:00	0.730751	60.4886	FALSE	0
2022-09-14	14:08:00	0.728054	61.2167	FALSE	0
2022-09-14	14:08:01	0.734975	61.9517	FALSE	0
2022-09-14	14:08:01	0.730852	62.6825	FALSE	0
2022-09-14	14:08:01	0.735382	63.4179	FALSE	0
2022-09-14	14:08:01	0.733041	64.151	FALSE	0
2022-09-14	14:08:02	0.807901	64.9589	FALSE	0
2022-09-14	14:08:02	0.588715	65.5476	FALSE	0
2022-09-14	14:08:02	0.750649	66.2982	FALSE	0
2022-09-14	14:08:02	0.739402	67.0376	FALSE	0
2022-09-14	14:08:03	0.732786	67.7704	FALSE	0
2022-09-14	14:08:03	0.738537	68.5089	FALSE	0
2022-09-14	14:08:03	0.730903	69.2398	FALSE	0
2022-09-14	14:08:04	0.727952	69.9678	FALSE	0
2022-09-14	14:08:04	0.733499	70.7013	FALSE	0
2022-09-14	14:08:04	0.726781	71.4281	FALSE	0
2022-09-14	14:08:04	0.722354	72.1504	FALSE	0
2022-09-14	14:08:05	1.4736	73.624	FALSE	0
2022-09-14	14:08:05	1.17258	74.7966	FALSE	0
2022-09-14	14:08:05	0.739402	75.536	FALSE	0
2022-09-14	14:08:05	0.732583	76.2686	FALSE	0
2022-09-14	14:08:06	0.735178	77.0038	FALSE	0
2022-09-14	14:08:06	0.730343	77.7341	FALSE	0
2022-09-14	14:08:06	0.736959	78.4711	FALSE	0
2022-09-14	14:08:06	0.732532	79.2036	FALSE	0
2022-09-14	14:08:07	0.728664	79.9323	FALSE	0
2022-09-14	14:08:07	0.735585	80.6679	FALSE	0
2022-09-14	14:08:07	0.734517	81.4024	FALSE	0
2022-09-14	14:08:08	0.733499	82.1359	FALSE	0
2022-09-14	14:08:08	0.730191	82.8661	FALSE	0
2022-09-14	14:08:08	0.738028	83.6041	FALSE	0
2022-09-14	14:08:08	0.732277	84.3364	FALSE	0
2022-09-14	14:08:09	0.733244	85.0696	FALSE	0
2022-09-14	14:08:09	0.733651	85.8033	FALSE	0
2022-09-14	14:08:09	0.729936	86.5332	FALSE	0
2022-09-14	14:08:09	0.731209	87.2644	FALSE	0
2022-09-14	14:08:10	0.73187	87.9963	FALSE	0
2022-09-14	14:08:10	0.729428	88.7257	FALSE	0
2022-09-14	14:08:10	0.737824	89.4635	FALSE	0
2022-09-14	14:08:10	0.730038	90.1936	FALSE	0
2022-09-14	14:08:11	0.729784	90.9234	FALSE	0
2022-09-14	14:08:11	0.739707	91.6631	FALSE	0
2022-09-14	14:08:11	0.735127	92.3982	FALSE	0
2022-09-14	14:08:12	0.734415	93.1326	FALSE	0
2022-09-14	14:08:12	0.733753	93.8664	FALSE	0
2022-09-14	14:08:12	0.731921	94.5983	FALSE	0
2022-09-14	14:08:12	0.540165	95.1384	FALSE	0
2022-09-14	14:08:13	0.718435	95.8569	FALSE	0
2022-09-14	14:08:13	0.731972	96.5888	FALSE	0
2022-09-14	14:08:13	0.733957	97.3228	FALSE	0
2022-09-14	14:08:13	0.733906	98.0567	FALSE	0
2022-09-14	14:08:14	0.735483	98.7922	FALSE	0
2022-09-14	14:08:14	0.735483	99.5277	FALSE	0
2022-09-14	14:08:14	0.73701	100.265	FALSE	0
2022-09-14	14:08:14	0.725458	100.99	FALSE	0
2022-09-14	14:08:15	0.73299	101.723	FALSE	0
2022-09-14	14:08:15	0.734313	102.457	FALSE	0
2022-09-14	14:08:15	0.733448	103.191	FALSE	0
2022-09-14	14:08:16	0.728308	103.919	FALSE	0
2022-09-14	14:08:16	0.738384	104.658	FALSE	0
2022-09-14	14:08:16	0.73757	105.395	FALSE	0
2022-09-14	14:08:16	0.738689	106.134	FALSE	0
2022-09-14	14:08:17	0.727036	106.861	FALSE	0
2022-09-14	14:08:17	0.748613	107.609	FALSE	0
2022-09-14	14:08:17	0.725814	108.335	FALSE	0
2022-09-14	14:08:17	0.728003	109.063	FALSE	0
2022-09-14	14:08:18	0.738181	109.801	FALSE	0
2022-09-14	14:08:18	0.669631	110.471	FALSE	0
2022-09-14	14:08:18	-0.385279	110.471	FALSE	0
2022-09-14	14:08:18	-0.00197174	110.471	FALSE	0
2022-09-14	14:08:19	0.711718	111.183	FALSE	0
2022-09-14	14:08:19	0.727494	111.91	FALSE	0
2022-09-14	14:08:19	0.728359	112.639	FALSE	0
2022-09-14	14:08:20	0.728308	113.367	FALSE	0
2022-09-14	14:08:20	0.735789	114.103	FALSE	0
2022-09-14	14:08:20	0.731005	114.834	FALSE	0
2022-09-14	14:08:20	0.733651	115.567	FALSE	0
2022-09-14	14:08:21	0.729122	116.297	FALSE	0
2022-09-14	14:08:21	0.736756	117.033	FALSE	0
2022-09-14	14:08:21	0.738028	117.771	FALSE	0
2022-09-14	14:08:21	0.735026	118.506	FALSE	0
2022-09-14	14:08:22	0.733295	119.24	FALSE	0
2022-09-14	14:08:22	0.729377	119.969	FALSE	0
2022-09-14	14:08:22	0.734059	120.703	FALSE	0
2022-09-14	14:08:22	0.740216	121.443	FALSE	0
2022-09-14	14:08:23	0.739097	122.182	FALSE	0
2022-09-14	14:08:23	0.757316	122.94	FALSE	0
2022-09-14	14:08:23	0.762506	123.702	FALSE	0
2022-09-14	14:08:24	0.731412	124.434	FALSE	0
2022-09-14	14:08:24	0.728613	125.162	FALSE	0
2022-09-14	14:08:24	0.735026	125.897	FALSE	0
2022-09-14	14:08:24	0.735229	126.633	FALSE	0
2022-09-14	14:08:25	0.732735	127.365	FALSE	0
2022-09-14	14:08:25	0.727341	128.093	FALSE	0
2022-09-14	14:08:25	0.735483	128.828	FALSE	0
2022-09-14	14:08:25	0.735483	129.564	FALSE	0
2022-09-14	14:08:26	0.729428	130.293	FALSE	0
2022-09-14	14:08:26	0.537926	130.831	FALSE	0
2022-09-14	14:08:26	0.725458	131.556	FALSE	0
2022-09-14	14:08:26	0.72897	132.285	FALSE	0
2022-09-14	14:08:27	0.732277	133.018	FALSE	0
2022-09-14	14:08:27	0.733601	133.751	FALSE	0
2022-09-14	14:08:27	0.727545	134.479	FALSE	0
2022-09-14	14:08:28	0.789987	135.269	FALSE	0
2022-09-14	14:08:28	2.45803	137.727	FALSE	0
2022-09-14	14:08:28	0.734364	138.461	FALSE	0
2022-09-14	14:08:28	0.734618	139.196	FALSE	0
2022-09-14	14:08:29	0.739402	139.935	FALSE	0
2022-09-14	14:08:29	0.737875	140.673	FALSE	0
2022-09-14	14:08:29	0.739198	141.412	FALSE	0
2022-09-14	14:08:29	0.737468	142.15	FALSE	0
2022-09-14	14:08:30	0.734873	142.885	FALSE	0
2022-09-14	14:08:30	0.732532	143.617	FALSE	0
2022-09-14	14:08:30	1.06403	144.681	FALSE	0
2022-09-14	14:08:30	0.775992	145.457	FALSE	0
2022-09-14	14:08:31	0.734568	146.192	FALSE	0
2022-09-14	14:08:31	0.735738	146.927	FALSE	0
2022-09-14	14:08:31	0.733601	147.661	FALSE	0
2022-09-14	14:08:32	0.730394	148.391	FALSE	0
2022-09-14	14:08:32	0.730852	149.122	FALSE	0
2022-09-14	14:08:32	0.736857	149.859	FALSE	0
2022-09-14	14:08:32	0.732837	150.592	FALSE	0
2022-09-14	14:08:33	0.731768	151.324	FALSE	0
2022-09-14	14:08:33	0.73187	152.056	FALSE	0
2022-09-14	14:08:33	0.738689	152.794	FALSE	0
2022-09-14	14:08:33	0.740929	153.535	FALSE	0
2022-09-14	14:08:34	0.736349	154.272	FALSE	0
2022-09-14	14:08:34	0.738028	155.01	FALSE	0
2022-09-14	14:08:34	0.733499	155.743	FALSE	0
2022-09-14	14:08:34	0.732481	156.476	FALSE	0
2022-09-14	14:08:35	0.728613	157.204	FALSE	0
2022-09-14	14:08:35	0.728664	157.933	FALSE	0
2022-09-14	14:08:35	0.736654	158.67	FALSE	0
2022-09-14	14:08:36	0.728868	159.398	FALSE	0
2022-09-14	14:08:36	0.730852	160.129	FALSE	0
2022-09-14	14:08:36	0.731463	160.861	FALSE	0
2022-09-14	14:08:36	0.735585	161.596	FALSE	0
2022-09-14	14:08:37	0.738028	162.334	FALSE	0
2022-09-14	14:08:37	0.739606	163.074	FALSE	0
2022-09-14	14:08:37	0.732735	163.807	FALSE	0
2022-09-14	14:08:38	0.735534	164.542	FALSE	0
2022-09-14	14:08:38	0.735483	165.278	FALSE	0
2022-09-14	14:08:38	0.732888	166.011	FALSE	0
2022-09-14	14:08:38	0.729936	166.741	FALSE	0
2022-09-14	14:08:38	0.733601	167.474	FALSE	0
2022-09-14	14:08:39	0.737468	168.212	FALSE	0
2022-09-14	14:08:39	0.73187	168.943	FALSE	0
2022-09-14	14:08:39	0.734415	169.678	FALSE	0
2022-09-14	14:08:40	0.72841	170.406	FALSE	0
2022-09-14	14:08:40	0.72897	171.135	FALSE	0
2022-09-14	14:08:40	0.736908	171.872	FALSE	0
2022-09-14	14:08:40	0.735534	172.608	FALSE	0
2022-09-14	14:08:41	0.735127	173.343	FALSE	0
2022-09-14	14:08:41	0.737366	174.08	FALSE	0
2022-09-14	14:08:41	0.73416	174.814	FALSE	0
2022-09-14	14:08:41	0.728054	175.542	FALSE	0
2022-09-14	14:08:42	0.729682	176.272	FALSE	0
2022-09-14	14:08:42	0.728054	177	FALSE	0
2022-09-14	14:08:42	0.726832	177.727	FALSE	0
2022-09-14	14:08:42	0.728868	178.456	FALSE	0
2022-09-14	14:08:43	0.732481	179.188	FALSE	0
2022-09-14	14:08:43	0.729733	179.918	FALSE	0
2022-09-14	14:08:43	0.729987	180.648	FALSE	0
2022-09-14	14:08:44	0.730343	181.378	FALSE	0
2022-09-14	14:08:44	0.733092	182.111	FALSE	0
2022-09-14	14:08:44	0.734618	182.846	FALSE	0
2022-09-14	14:08:44	0.731158	183.577	FALSE	0
2022-09-14	14:08:45	0.729275	184.307	FALSE	0
2022-09-14	14:08:45	0.727392	185.034	FALSE	0
2022-09-14	14:08:45	0.729377	185.763	FALSE	0
2022-09-14	14:08:45	0.731565	186.495	FALSE	0
2022-09-14	14:08:46	0.739911	187.235	FALSE	0
2022-09-14	14:08:46	0.730903	187.966	FALSE	0
2022-09-14	14:08:46	0.735026	188.701	FALSE	0
2022-09-14	14:08:46	0.734262	189.435	FALSE	0
2022-09-14	14:08:47	0.728461	190.163	FALSE	0
2022-09-14	14:08:47	0.731158	190.895	FALSE	0
2022-09-14	14:08:47	0.725712	191.62	FALSE	0
2022-09-14	14:08:48	0.738231	192.359	FALSE	0
2022-09-14	14:08:48	0.726476	193.085	FALSE	0
2022-09-14	14:08:48	0.729682	193.815	FALSE	0
2022-09-14	14:08:48	0.736247	194.551	FALSE	0
2022-09-14	14:08:49	0.728155	195.279	FALSE	0
2022-09-14	14:08:49	0.733753	196.013	FALSE	0
2022-09-14	14:08:49	0.731056	196.744	FALSE	0
2022-09-14	14:08:49	0.731514	197.475	FALSE	0
2022-09-14	14:08:50	0.736043	198.211	FALSE	0
2022-09-14	14:08:50	0.731972	198.943	FALSE	0
2022-09-14	14:08:50	0.732735	199.676	FALSE	0
2022-09-14	14:08:50	0.734262	200.41	FALSE	0
2022-09-14	14:08:51	0.728766	201.139	FALSE	0
2022-09-14	14:08:51	0.732125	201.871	FALSE	0
2022-09-14	14:08:51	0.728003	202.599	FALSE	0
2022-09-14	14:08:52	0.73187	203.331	FALSE	0
2022-09-14	14:08:52	0.728359	204.06	FALSE	0
2022-09-14	14:08:52	0.727036	204.787	FALSE	0
2022-09-14	14:08:52	0.732379	205.519	FALSE	0
2022-09-14	14:08:53	0.731768	206.251	FALSE	0
2022-09-14	14:08:53	0.726781	206.977	FALSE	0
2022-09-14	14:08:53	0.732277	207.71	FALSE	0
2022-09-14	14:08:53	0.737824	208.448	FALSE	0
2022-09-14	14:08:54	0.732939	209.181	FALSE	0
2022-09-14	14:08:54	0.728919	209.909	FALSE	0
2022-09-14	14:08:54	0.730649	210.64	FALSE	0
2022-09-14	14:08:54	0.733295	211.373	FALSE	0
2022-09-14	14:08:55	0.732125	212.106	FALSE	0
2022-09-14	14:08:55	0.729326	212.835	FALSE	0
2022-09-14	14:08:55	0.732175	213.567	FALSE	0
2022-09-14	14:08:56	0.7307	214.298	FALSE	0
2022-09-14	14:08:56	0.74444	215.042	FALSE	0
2022-09-14	14:08:56	0.743575	215.786	FALSE	0
2022-09-14	14:08:56	0.730394	216.516	FALSE	0
2022-09-14	14:08:57	0.692939	217.209	FALSE	0
2022-09-14	14:08:57	0.649275	217.858	FALSE	0
2022-09-14	14:08:57	0.536603	218.395	FALSE	0
2022-09-14	14:08:57	0.37416	218.769	FALSE	0
2022-09-14	14:08:58	-0.160598	218.769	FALSE	0
2022-09-14	14:08:58	-0.386653	218.769	FALSE	0
2022-09-14	14:08:58	-0.321412	218.769	FALSE	0
2022-09-14	14:08:58	-0.313066	218.769	FALSE	0
2022-09-14	14:08:59	-0.0281295	218.769	FALSE	0
2022-09-14	14:08:59	0.692532	219.462	FALSE	0
2022-09-14	14:08:59	0.730751	220.192	FALSE	0
2022-09-14	14:09:00	0.684084	220.876	FALSE	0
2022-09-14	14:09:00	0.706679	221.583	FALSE	0
2022-09-14	14:09:00	0.636603	222.22	FALSE	0
2022-09-14	14:09:00	0.636552	222.856	FALSE	0
2022-09-14	14:09:01	0.732583	223.589	FALSE	0
2022-09-14	14:09:01	0.554059	224.143	FALSE	0
2022-09-14	14:09:01	0.681794	224.825	FALSE	0
2022-09-14	14:09:01	0.483117	225.308	FALSE	0
2022-09-14	14:09:02	0.607901	225.916	FALSE	0
2022-09-14	14:09:02	0.758384	226.674	FALSE	0
2022-09-14	14:09:02	0.725458	227.4	FALSE	0
2022-09-14	14:09:02	0.640725	228.04	FALSE	0
2022-09-14	14:09:03	0.517163	228.557	FALSE	0
2022-09-14	14:09:03	0.785254	229.343	FALSE	0
2022-09-14	14:09:03	0.618893	229.962	FALSE	0
2022-09-14	14:09:04	0.54042	230.502	FALSE	0
2022-09-14	14:09:04	0.491921	230.994	FALSE	0
2022-09-14	14:09:04	0.463982	231.458	FALSE	0
2022-09-14	14:09:04	0.426323	231.884	FALSE	0
2022-09-14	14:09:05	0.433804	232.318	FALSE	0
2022-09-14	14:09:05	0.431361	232.749	FALSE	0
2022-09-14	14:09:05	0.409529	233.159	FALSE	0
2022-09-14	14:09:05	0.40215	233.561	FALSE	0
2022-09-14	14:09:06	0.395942	233.957	FALSE	0
2022-09-14	14:09:06	0.397214	234.354	FALSE	0
2022-09-14	14:09:06	0.398537	234.753	FALSE	0
2022-09-14	14:09:06	0.398028	235.151	FALSE	0
2022-09-14	14:09:07	0.391463	235.542	FALSE	0
2022-09-14	14:09:07	0.376858	235.919	FALSE	0
2022-09-14	14:09:07	0.343728	236.263	FALSE	0
2022-09-14	14:09:08	0.345255	236.608	FALSE	0
2022-09-14	14:09:08	0.353702	236.962	FALSE	0
2022-09-14	14:09:08	0.34383	237.306	FALSE	0
2022-09-14	14:09:08	0.355942	237.662	FALSE	0
2022-09-14	14:09:09	0.350293	238.012	FALSE	0
2022-09-14	14:09:09	0.368766	238.381	FALSE	0
2022-09-14	14:09:09	2.84719	241.228	FALSE	0
2022-09-14	14:09:09	2.19645	243.424	FALSE	0
2022-09-14	14:09:10	0.761387	244.186	FALSE	0
2022-09-14	14:09:10	0.706679	244.892	FALSE	0
2022-09-14	14:09:10	0.696247	245.589	FALSE	0
2022-09-14	14:09:10	0.690852	246.279	FALSE	0
2022-09-14	14:09:11	0.665611	246.945	FALSE	0
2022-09-14	14:09:11	0.637417	247.583	FALSE	0
2022-09-14	14:09:11	-0.455	247.583	FALSE	0
2022-09-14	14:09:12	-0.561513	247.583	FALSE	0
2022-09-14	14:09:12	-0.542124	247.583	FALSE	0
2022-09-14	14:09:12	-0.225381	247.583	FALSE	0
2022-09-14	14:09:12	0.200471	247.783	FALSE	0
2022-09-14	14:09:13	0.238028	248.021	FALSE	0
2022-09-14	14:09:13	0.195076	248.216	FALSE	0
2022-09-14	14:09:13	0.199097	248.415	FALSE	0
2022-09-14	14:09:13	0.0443895	248.46	FALSE	0
2022-09-14	14:09:14	0.187952	248.648	FALSE	0
2022-09-14	14:09:14	-0.158613	248.648	FALSE	0
2022-09-14	14:09:14	-0.289503	248.648	FALSE	0
2022-09-14	14:09:14	-0.0268572	248.648	FALSE	0
2022-09-14	14:09:15	-0.371488	248.648	FALSE	0
2022-09-14	14:09:15	-0.562582	248.648	FALSE	0
2022-09-14	14:09:15	-0.569554	248.648	FALSE	0
2022-09-14	14:09:16	-0.480343	248.648	FALSE	0
2022-09-14	14:09:16	-0.569758	248.648	FALSE	0
2022-09-14	14:09:16	-0.436068	248.648	FALSE	0
2022-09-14	14:09:16	-0.437646	248.648	FALSE	0
2022-09-14	14:09:17	-0.275712	248.648	FALSE	0
2022-09-14	14:09:17	-0.350725	248.648	FALSE	0
2022-09-14	14:09:17	-0.242684	248.648	FALSE	0
2022-09-14	14:09:17	-0.119325	248.648	FALSE	0
2022-09-14	14:09:18	-0.213626	248.648	FALSE	0
2022-09-14	14:09:18	-0.209962	248.648	FALSE	0
2022-09-14	14:09:18	-0.200241	248.648	FALSE	0
2022-09-14	14:09:18	-0.364618	248.648	FALSE	0
2022-09-14	14:09:19	-0.482073	248.648	FALSE	0
2022-09-14	14:09:19	-0.443804	248.648	FALSE	0
2022-09-14	14:09:19	-0.386653	248.648	FALSE	0
2022-09-14	14:09:20	-0.392862	248.648	FALSE	0
2022-09-14	14:09:20	-0.300547	248.648	FALSE	0
2022-09-14	14:09:20	0.0383845	248.686	FALSE	0
2022-09-14	14:09:20	0.00754479	248.693	FALSE	0
2022-09-14	14:09:21	-0.101972	248.693	FALSE	0
2022-09-14	14:09:21	-0.211895	248.693	FALSE	0
2022-09-14	14:09:21	-0.323753	248.693	FALSE	0
2022-09-14	14:09:21	-0.368486	248.693	FALSE	0
2022-09-14	14:09:22	-0.302073	248.693	FALSE	0
2022-09-14	14:09:22	-0.286501	248.693	FALSE	0
2022-09-14	14:09:22	-0.179987	248.693	FALSE	0
2022-09-14	14:09:22	-0.145585	248.693	FALSE	0
2022-09-14	14:09:23	-0.238308	248.693	FALSE	0
2022-09-14	14:09:23	-0.332811	248.693	FALSE	0
2022-09-14	14:09:23	-0.406908	248.693	FALSE	0
2022-09-14	14:09:24	-0.326246	248.693	FALSE	0
2022-09-14	14:09:24	-0.280241	248.693	FALSE	0
2022-09-14	14:09:24	-0.253422	248.693	FALSE	0
2022-09-14	14:09:24	-0.205229	248.693	FALSE	0
2022-09-14	14:09:25	-0.00207355	248.693	FALSE	0
2022-09-14	14:09:25	-0.0800379	248.693	FALSE	0
2022-09-14	14:09:25	0.0642878	248.758	FALSE	0
2022-09-14	14:09:25	2.04011	250.798	FALSE	0
2022-09-14	14:09:26	2.95075	253.749	FALSE	0
2022-09-14	14:09:26	0.55187	254.3	FALSE	0
2022-09-14	14:09:26	0.458232	254.759	FALSE	0
2022-09-14	14:09:26	0.372176	255.131	FALSE	0
2022-09-14	14:09:27	0.277723	255.409	FALSE	0
2022-09-14	14:09:27	0.15757	255.566	FALSE	0
2022-09-14	14:09:27	0.0119723	255.578	FALSE	0
2022-09-14	14:09:28	-0.0988165	255.578	FALSE	0
2022-09-14	14:09:28	0.531565	256.11	FALSE	0
2022-09-14	14:09:28	0.926781	257.037	FALSE	0
2022-09-14	14:09:28	0.569631	257.606	FALSE	0
2022-09-14	14:09:29	0.600369	258.207	FALSE	0
2022-09-14	14:09:29	0.487748	258.694	FALSE	0
2022-09-14	14:09:29	0.765458	259.46	FALSE	0
2022-09-14	14:09:29	0.662964	260.123	FALSE	0
2022-09-14	14:09:30	0.612277	260.735	FALSE	0
2022-09-14	14:09:30	0.467901	261.203	FALSE	0
2022-09-14	14:09:30	0.460471	261.663	FALSE	0
2022-09-14	14:09:30	0.416654	262.08	FALSE	0
2022-09-14	14:09:31	0.487137	262.567	FALSE	0
2022-09-14	14:09:31	0.445814	263.013	FALSE	0
2022-09-14	14:09:31	0.436705	263.45	FALSE	0
2022-09-14	14:09:32	0.390344	263.84	FALSE	0
2022-09-14	14:09:32	0.435127	264.275	FALSE	0
2022-09-14	14:09:32	0.495026	264.77	FALSE	0
2022-09-14	14:09:32	0.39701	265.167	FALSE	0
2022-09-14	14:09:33	0.371616	265.539	FALSE	0
2022-09-14	14:09:33	0.412227	265.951	FALSE	0
2022-09-14	14:09:33	0.436298	266.387	FALSE	0
2022-09-14	14:09:33	0.542659	266.93	FALSE	0
2022-09-14	14:09:34	0.575738	267.506	FALSE	0
2022-09-14	14:09:34	0.625	268.131	FALSE	0
2022-09-14	14:09:34	0.661438	268.792	FALSE	0
2022-09-14	14:09:34	0.674974	269.467	FALSE	0
2022-09-14	14:09:35	0.581641	270.049	FALSE	0
2022-09-14	14:09:35	0.473804	270.523	FALSE	0
2022-09-14	14:09:35	0.510954	271.033	FALSE	0
2022-09-14	14:09:36	0.925356	271.959	FALSE	0
2022-09-14	14:09:36	0.788104	272.747	FALSE	0
2022-09-14	14:09:36	0.702048	273.449	FALSE	0
2022-09-14	14:09:36	0.677366	274.126	FALSE	0
2022-09-14	14:09:37	0.737112	274.863	FALSE	0
2022-09-14	14:09:37	0.781946	275.645	FALSE	0
2022-09-14	14:09:37	0.460369	276.106	FALSE	0
2022-09-14	14:09:37	0.470649	276.576	FALSE	0
2022-09-14	14:09:38	0.493957	277.07	FALSE	0
2022-09-14	14:09:38	0.364898	277.435	FALSE	0
2022-09-14	14:09:38	0.294211	277.73	FALSE	0
2022-09-14	14:09:38	0.257672	277.987	FALSE	0
2022-09-14	14:09:39	0.209733	278.197	FALSE	0
2022-09-14	14:09:39	0.387239	278.584	FALSE	0
2022-09-14	14:09:39	0.100725	278.685	FALSE	0
2022-09-14	14:09:40	0.263219	278.948	FALSE	0
2022-09-14	14:09:40	0.192023	279.14	FALSE	0
2022-09-14	14:09:40	0.358944	279.499	FALSE	0
2022-09-14	14:09:40	0.324949	279.824	FALSE	0
2022-09-14	14:09:41	0.638588	280.463	FALSE	0
2022-09-14	14:09:41	0.553397	281.016	FALSE	0
2022-09-14	14:09:41	0.544237	281.56	FALSE	0
2022-09-14	14:09:41	0.562354	282.123	FALSE	0
2022-09-14	14:09:42	0.425102	282.548	FALSE	0
2022-09-14	14:09:42	0.54388	283.092	FALSE	0
2022-09-14	14:09:42	0.37472	283.466	FALSE	0
2022-09-14	14:09:42	0.450751	283.917	FALSE	0
2022-09-14	14:09:43	0.434618	284.352	FALSE	0
2022-09-14	14:09:43	0.433601	284.785	FALSE	0
2022-09-14	14:09:43	0.441234	285.226	FALSE	0
2022-09-14	14:09:44	0.443066	285.67	FALSE	0
2022-09-14	14:09:44	0.408613	286.078	FALSE	0
2022-09-14	14:09:44	0.41014	286.488	FALSE	0
2022-09-14	14:09:44	0.388919	286.877	FALSE	0
2022-09-14	14:09:45	0.411107	287.288	FALSE	0
2022-09-14	14:09:45	0.39757	287.686	FALSE	0
2022-09-14	14:09:45	0.454008	288.14	FALSE	0
2022-09-14	14:09:45	0.516756	288.657	FALSE	0
2022-09-14	14:09:46	0.432888	289.09	FALSE	0
2022-09-14	14:09:46	0.425713	289.515	FALSE	0
2022-09-14	14:09:46	0.434211	289.949	FALSE	0
2022-09-14	14:09:46	0.447748	290.397	FALSE	0
2022-09-14	14:09:47	0.528766	290.926	FALSE	0
2022-09-14	14:09:47	0.315687	291.242	FALSE	0
2022-09-14	14:09:47	1.18653	292.428	FALSE	0
2022-09-14	14:09:48	2.97579	295.404	FALSE	0
2022-09-14	14:09:48	1.83869	297.243	FALSE	0
2022-09-14	14:09:48	0.735636	297.978	FALSE	0
2022-09-14	14:09:48	0.624847	298.603	FALSE	0
2022-09-14	14:09:49	0.449173	299.052	FALSE	0
2022-09-14	14:09:49	0.494975	299.547	FALSE	0
2022-09-14	14:09:49	0.598384	300.146	FALSE	0
2022-09-14	14:09:49	0.653244	300.799	FALSE	0
2022-09-14	14:09:50	0.710903	301.51	FALSE	0
2022-09-14	14:09:50	0.731107	302.241	FALSE	0
2022-09-14	14:09:50	0.730751	302.972	FALSE	0
2022-09-14	14:09:50	0.733804	303.706	FALSE	0
2022-09-14	14:09:51	0.729224	304.435	FALSE	0
2022-09-14	14:09:51	0.734669	305.169	FALSE	0
2022-09-14	14:09:51	0.730598	305.9	FALSE	0
2022-09-14	14:09:52	0.727392	306.627	FALSE	0
2022-09-14	14:09:52	0.734924	307.362	FALSE	0
2022-09-14	14:09:52	0.731463	308.094	FALSE	0
2022-09-14	14:09:52	0.749987	308.844	FALSE	0
2022-09-14	14:09:53	0.726476	309.57	FALSE	0
2022-09-14	14:09:53	0.730394	310.301	FALSE	0
2022-09-14	14:09:53	0.734059	311.035	FALSE	0
2022-09-14	14:09:53	0.735891	311.771	FALSE	0
2022-09-14	14:09:54	0.734059	312.505	FALSE	0
2022-09-14	14:09:54	0.735127	313.24	FALSE	0
2022-09-14	14:09:54	0.734924	313.975	FALSE	0
2022-09-14	14:09:54	0.734364	314.709	FALSE	0
2022-09-14	14:09:55	0.729631	315.439	FALSE	0
2022-09-14	14:09:55	0.730038	316.169	FALSE	0
2022-09-14	14:09:55	0.733346	316.902	FALSE	0
2022-09-14	14:09:56	0.736298	317.638	FALSE	0
2022-09-14	14:09:56	0.659148	318.298	FALSE	0
2022-09-14	14:09:56	-1.26833	318.298	FALSE	0
2022-09-14	14:09:56	0.41187	318.709	FALSE	0
2022-09-14	14:09:57	-0.166399	318.709	FALSE	0
2022-09-14	14:09:57	-0.746399	318.709	FALSE	0
2022-09-14	14:09:57	0.737977	319.447	FALSE	0
2022-09-14	14:09:57	0.736399	320.184	FALSE	0
2022-09-14	14:09:58	0.73584	320.92	FALSE	0
2022-09-14	14:09:58	0.733651	321.653	FALSE	0
2022-09-14	14:09:58	0.731005	322.384	FALSE	0
2022-09-14	14:09:58	0.761488	323.146	FALSE	0
2022-09-14	14:09:59	0.746883	323.893	FALSE	0
2022-09-14	14:09:59	0.727646	324.62	FALSE	0
2022-09-14	14:09:59	0.730293	325.351	FALSE	0
2022-09-14	14:10:00	0.736399	326.087	FALSE	0
2022-09-14	14:10:00	0.736399	326.823	FALSE	0
2022-09-14	14:10:00	0.728155	327.552	FALSE	0
2022-09-14	14:10:00	0.733295	328.285	FALSE	0
2022-09-14	14:10:01	0.73299	329.018	FALSE	0
2022-09-14	14:10:01	0.731565	329.749	FALSE	0
2022-09-14	14:10:01	0.728919	330.478	FALSE	0
2022-09-14	14:10:01	0.738486	331.217	FALSE	0
2022-09-14	14:10:02	0.738995	331.956	FALSE	0
2022-09-14	14:10:02	0.727239	332.683	FALSE	0
2022-09-14	14:10:02	0.731514	333.415	FALSE	0
2022-09-14	14:10:02	0.739147	334.154	FALSE	0
2022-09-14	14:10:03	0.735076	334.889	FALSE	0
2022-09-14	14:10:03	0.730954	335.62	FALSE	0
2022-09-14	14:10:03	0.733855	336.354	FALSE	0
2022-09-14	14:10:04	0.728461	337.082	FALSE	0
2022-09-14	14:10:04	0.73355	337.816	FALSE	0
2022-09-14	14:10:04	0.734873	338.55	FALSE	0
2022-09-14	14:10:04	0.737366	339.288	FALSE	0
2022-09-14	14:10:05	0.729224	340.017	FALSE	0
2022-09-14	14:10:05	0.732125	340.749	FALSE	0
2022-09-14	14:10:05	0.739707	341.489	FALSE	0
2022-09-14	14:10:05	0.732583	342.221	FALSE	0
2022-09-14	14:10:06	0.72958	342.951	FALSE	0
2022-09-14	14:10:06	0.728613	343.68	FALSE	0
2022-09-14	14:10:06	0.732175	344.412	FALSE	0
2022-09-14	14:10:06	0.731565	345.143	FALSE	0
2022-09-14	14:10:07	0.726985	345.87	FALSE	0
2022-09-14	14:10:07	0.737519	346.608	FALSE	0
2022-09-14	14:10:07	0.72612	347.334	FALSE	0
2022-09-14	14:10:08	0.734059	348.068	FALSE	0
2022-09-14	14:10:08	0.734517	348.803	FALSE	0
2022-09-14	14:10:08	0.734822	349.537	FALSE	0
2022-09-14	14:10:08	0.596501	350.134	FALSE	0
2022-09-14	14:10:09	-0.441412	350.134	FALSE	0
2022-09-14	14:10:09	0.728664	350.863	FALSE	0
2022-09-14	14:10:09	0.735178	351.598	FALSE	0
2022-09-14	14:10:09	0.735331	352.333	FALSE	0
2022-09-14	14:10:10	0.731209	353.064	FALSE	0
2022-09-14	14:10:10	0.733651	353.798	FALSE	0
2022-09-14	14:10:10	0.73416	354.532	FALSE	0
2022-09-14	14:10:10	0.738537	355.271	FALSE	0
2022-09-14	14:10:11	0.744236	356.015	FALSE	0
2022-09-14	14:10:11	0.735941	356.751	FALSE	0
2022-09-14	14:10:11	0.740776	357.492	FALSE	0
2022-09-14	14:10:12	0.73131	358.223	FALSE	0
2022-09-14	14:10:12	0.726679	358.95	FALSE	0
2022-09-14	14:10:12	0.732226	359.682	FALSE	0
2022-09-14	14:10:12	0.731259	360.413	FALSE	0
2022-09-14	14:10:13	0.732226	361.145	FALSE	0
2022-09-14	14:10:13	0.734059	361.879	FALSE	0
2022-09-14	14:10:13	0.624338	362.504	FALSE	0
2022-09-14	14:10:13	0.134822	362.639	FALSE	0
2022-09-14	14:10:14	0.172023	362.811	FALSE	0
2022-09-14	14:10:14	0.0171631	362.828	FALSE	0
2022-09-14	14:10:14	-0.0422262	362.828	FALSE	0
2022-09-14	14:10:14	0.204797	363.033	FALSE	0
2022-09-14	14:10:15	0.557112	363.59	FALSE	0
2022-09-14	14:10:15	0.586832	364.176	FALSE	0
2022-09-14	14:10:15	0.731463	364.908	FALSE	0
2022-09-14	14:10:16	0.235738	365.144	FALSE	0
2022-09-14	14:10:16	-0.340445	365.144	FALSE	0
2022-09-14	14:10:16	-0.421157	365.144	FALSE	0
2022-09-14	14:10:16	-0.415203	365.144	FALSE	0
2022-09-14	14:10:17	-0.402277	365.144	FALSE	0
2022-09-14	14:10:17	-0.409045	365.144	FALSE	0
2022-09-14	14:10:17	-0.40075	365.144	FALSE	0
2022-09-14	14:10:17	-0.394185	365.144	FALSE	0
2022-09-14	14:10:18	-0.378816	365.144	FALSE	0
2022-09-14	14:10:18	-0.393117	365.144	FALSE	0
2022-09-14	14:10:18	-0.362429	365.144	FALSE	0
2022-09-14	14:10:18	-0.38645	365.144	FALSE	0
2022-09-14	14:10:19	-0.399122	365.144	FALSE	0
2022-09-14	14:10:19	-0.384669	365.144	FALSE	0
2022-09-14	14:10:19	-0.380852	365.144	FALSE	0
2022-09-14	14:10:20	-0.376374	365.144	FALSE	0
2022-09-14	14:10:20	-0.372658	365.144	FALSE	0
2022-09-14	14:10:20	-0.382073	365.144	FALSE	0
2022-09-14	14:10:20	-0.375407	365.144	FALSE	0
2022-09-14	14:10:21	-0.363956	365.144	FALSE	0
2022-09-14	14:10:21	-0.332557	365.144	FALSE	0
2022-09-14	14:10:21	-0.313371	365.144	FALSE	0
2022-09-14	14:10:21	-0.308944	365.144	FALSE	0
2022-09-14	14:10:22	-0.339224	365.144	FALSE	0
2022-09-14	14:10:22	-0.363091	365.144	FALSE	0
2022-09-14	14:10:22	-0.362226	365.144	FALSE	0
2022-09-14	14:10:22	-0.378104	365.144	FALSE	0
2022-09-14	14:10:23	-0.376933	365.144	FALSE	0
2022-09-14	14:10:23	-0.373473	365.144	FALSE	0
2022-09-14	14:10:23	-0.368384	365.144	FALSE	0
2022-09-14	14:10:24	-0.371539	365.144	FALSE	0
2022-09-14	14:10:24	-0.372048	365.144	FALSE	0
2022-09-14	14:10:24	-0.378969	365.144	FALSE	0
2022-09-14	14:10:24	-0.37902	365.144	FALSE	0
2022-09-14	14:10:25	-0.37505	365.144	FALSE	0
2022-09-14	14:10:25	-0.370623	365.144	FALSE	0
2022-09-14	14:10:25	-0.366094	365.144	FALSE	0
2022-09-14	14:10:25	-0.357493	365.144	FALSE	0
2022-09-14	14:10:26	-0.361564	365.144	FALSE	0
2022-09-14	14:10:26	-0.33673	365.144	FALSE	0
2022-09-14	14:10:26	-0.231336	365.144	FALSE	0
2022-09-14	14:10:27	-0.345839	365.144	FALSE	0
2022-09-14	14:10:27	-0.431946	365.144	FALSE	0
2022-09-14	14:10:27	-0.3779	365.144	FALSE	0
2022-09-14	14:10:27	-0.316475	365.144	FALSE	0
2022-09-14	14:10:28	-0.454134	365.144	FALSE	0
2022-09-14	14:10:28	-0.698969	365.144	FALSE	0
2022-09-14	14:10:28	-0.801615	365.144	FALSE	0
2022-09-14	14:10:28	-0.863345	365.144	FALSE	0
2022-09-14	14:10:29	-0.581513	365.144	FALSE	0
2022-09-14	14:10:29	-0.604211	365.144	FALSE	0
2022-09-14	14:10:29	-0.524872	365.144	FALSE	0
2022-09-14	14:10:29	-0.353269	365.144	FALSE	0
2022-09-14	14:10:30	-0.169402	365.144	FALSE	0
2022-09-14	14:10:30	-0.157799	365.144	FALSE	0
2022-09-14	14:10:30	-0.0606995	365.144	FALSE	0
2022-09-14	14:10:30	0.0123794	365.156	FALSE	0
2022-09-14	14:10:31	-0.0291473	365.156	FALSE	0
2022-09-14	14:10:31	-0.043702	365.156	FALSE	0
2022-09-14	14:10:31	0.0296313	365.186	FALSE	0
2022-09-14	14:10:32	-0.0107758	365.186	FALSE	0
2022-09-14	14:10:32	-0.03444	365.186	FALSE	0
2022-09-14	14:10:32	-0.0483331	365.186	FALSE	0
2022-09-14	14:10:32	-0.0408013	365.186	FALSE	0
2022-09-14	14:10:33	0.103575	365.289	FALSE	0
2022-09-14	14:10:33	0.375585	365.665	FALSE	0
2022-09-14	14:10:33	0.462761	366.128	FALSE	0
2022-09-14	14:10:33	0.451514	366.579	FALSE	0
2022-09-14	14:10:34	0.442252	367.021	FALSE	0
2022-09-14	14:10:34	0.435585	367.457	FALSE	0
2022-09-14	14:10:34	0.430445	367.887	FALSE	0
2022-09-14	14:10:34	0.426527	368.314	FALSE	0
2022-09-14	14:10:35	0.428308	368.742	FALSE	0
2022-09-14	14:10:35	0.418944	369.161	FALSE	0
2022-09-14	14:10:35	0.415942	369.577	FALSE	0
2022-09-14	14:10:36	0.410242	369.987	FALSE	0
2022-09-14	14:10:36	0.40673	370.394	FALSE	0
2022-09-14	14:10:36	0.406781	370.801	FALSE	0
2022-09-14	14:10:36	0.400674	371.202	FALSE	0
2022-09-14	14:10:37	0.401234	371.603	FALSE	0
2022-09-14	14:10:37	0.399148	372.002	FALSE	0
2022-09-14	14:10:37	0.405407	372.407	FALSE	0
2022-09-14	14:10:37	0.399453	372.807	FALSE	0
2022-09-14	14:10:38	0.396959	373.204	FALSE	0
2022-09-14	14:10:38	0.389886	373.594	FALSE	0
2022-09-14	14:10:38	0.394059	373.988	FALSE	0
2022-09-14	14:10:38	0.395636	374.383	FALSE	0
2022-09-14	14:10:39	0.386832	374.77	FALSE	0
2022-09-14	14:10:39	0.382914	375.153	FALSE	0
2022-09-14	14:10:39	0.383422	375.536	FALSE	0
2022-09-14	14:10:40	0.36958	375.906	FALSE	0
2022-09-14	14:10:40	0.369835	376.276	FALSE	0
2022-09-14	14:10:40	0.367188	376.643	FALSE	0
2022-09-14	14:10:40	0.359199	377.002	FALSE	0
2022-09-14	14:10:41	0.353601	377.356	FALSE	0
2022-09-14	14:10:41	0.350598	377.706	FALSE	0
2022-09-14	14:10:41	0.348053	378.055	FALSE	0
2022-09-14	14:10:41	0.345509	378.4	FALSE	0
2022-09-14	14:10:42	0.334771	378.735	FALSE	0
2022-09-14	14:10:42	0.340675	379.075	FALSE	0
2022-09-14	14:10:42	0.339809	379.415	FALSE	0
2022-09-14	14:10:42	0.347646	379.763	FALSE	0
2022-09-14	14:10:43	0.345458	380.108	FALSE	0
2022-09-14	14:10:43	0.347494	380.456	FALSE	0
2022-09-14	14:10:43	0.352837	380.809	FALSE	0
2022-09-14	14:10:44	0.36042	381.169	FALSE	0
2022-09-14	14:10:44	0.369987	381.539	FALSE	0
2022-09-14	14:10:44	0.371158	381.91	FALSE	0
2022-09-14	14:10:44	0.378333	382.289	FALSE	0
2022-09-14	14:10:45	0.388308	382.677	FALSE	0
2022-09-14	14:10:45	0.378995	383.056	FALSE	0
2022-09-14	14:10:45	0.387036	383.443	FALSE	0
2022-09-14	14:10:45	0.380216	383.823	FALSE	0
2022-09-14	14:10:46	0.392532	384.216	FALSE	0
2022-09-14	14:10:46	0.391514	384.607	FALSE	0
2022-09-14	14:10:46	0.388766	384.996	FALSE	0
2022-09-14	14:10:46	0.384593	385.381	FALSE	0
2022-09-14	14:10:47	0.388257	385.769	FALSE	0
2022-09-14	14:10:47	0.376756	386.146	FALSE	0
2022-09-14	14:10:47	0.375687	386.521	FALSE	0
2022-09-14	14:10:48	0.380064	386.901	FALSE	0
2022-09-14	14:10:48	0.368308	387.27	FALSE	0
2022-09-14	14:10:48	0.367494	387.637	FALSE	0
2022-09-14	14:10:48	0.358232	387.995	FALSE	0
2022-09-14	14:10:49	0.36444	388.36	FALSE	0
2022-09-14	14:10:49	0.363931	388.724	FALSE	0
2022-09-14	14:10:49	0.346272	389.07	FALSE	0
2022-09-14	14:10:49	0.349071	389.419	FALSE	0
2022-09-14	14:10:50	0.34271	389.762	FALSE	0
2022-09-14	14:10:50	0.340878	390.103	FALSE	0
2022-09-14	14:10:50	0.340369	390.443	FALSE	0
2022-09-14	14:10:50	0.342252	390.785	FALSE	0
2022-09-14	14:10:51	0.338079	391.123	FALSE	0
2022-09-14	14:10:51	0.336247	391.46	FALSE	0
2022-09-14	14:10:51	0.339809	391.799	FALSE	0
2022-09-14	14:10:52	0.342812	392.142	FALSE	0
2022-09-14	14:10:52	0.349631	392.492	FALSE	0
2022-09-14	14:10:52	0.34841	392.84	FALSE	0
2022-09-14	14:10:52	0.343677	393.184	FALSE	0
2022-09-14	14:10:53	0.349428	393.533	FALSE	0
2022-09-14	14:10:53	0.35299	393.886	FALSE	0
2022-09-14	14:10:53	0.358181	394.245	FALSE	0
2022-09-14	14:10:53	0.359402	394.604	FALSE	0
2022-09-14	14:10:54	0.352939	394.957	FALSE	0
2022-09-14	14:10:54	0.332227	395.289	FALSE	0
2022-09-14	14:10:54	0.321031	395.61	FALSE	0
2022-09-14	14:10:54	0.288817	395.899	FALSE	0
2022-09-14	14:10:55	0.274771	396.174	FALSE	0
2022-09-14	14:10:55	0.269631	396.443	FALSE	0
2022-09-14	14:10:55	0.26327	396.707	FALSE	0
2022-09-14	14:10:56	0.248054	396.955	FALSE	0
2022-09-14	14:10:56	0.23813	397.193	FALSE	0
2022-09-14	14:10:56	0.2307	397.424	FALSE	0
2022-09-14	14:10:56	0.227392	397.651	FALSE	0
2022-09-14	14:10:57	0.247494	397.898	FALSE	0
2022-09-14	14:10:57	0.264288	398.163	FALSE	0
2022-09-14	14:10:57	0.255433	398.418	FALSE	0
2022-09-14	14:10:57	0.260929	398.679	FALSE	0
2022-09-14	14:10:58	0.263779	398.943	FALSE	0
2022-09-14	14:10:58	0.256959	399.2	FALSE	0
2022-09-14	14:10:58	0.263677	399.463	FALSE	0
2022-09-14	14:10:58	0.261132	399.725	FALSE	0
2022-09-14	14:10:59	0.269377	399.994	FALSE	0
2022-09-14	14:10:59	0.271005	400.265	FALSE	0
2022-09-14	14:10:59	0.275585	400.541	FALSE	0
2022-09-14	14:11:00	0.287494	400.828	FALSE	0
2022-09-14	14:11:00	0.289886	401.118	FALSE	0
2022-09-14	14:11:00	0.293855	401.412	FALSE	0
2022-09-14	14:11:00	0.301998	401.714	FALSE	0
2022-09-14	14:11:01	0.297875	402.012	FALSE	0
2022-09-14	14:11:01	0.300267	402.312	FALSE	0
2022-09-14	14:11:01	0.313397	402.625	FALSE	0
2022-09-14	14:11:01	0.304695	402.93	FALSE	0
2022-09-14	14:11:02	0.314109	403.244	FALSE	0
2022-09-14	14:11:02	0.314873	403.559	FALSE	0
2022-09-14	14:11:02	0.316247	403.875	FALSE	0
2022-09-14	14:11:02	0.317366	404.193	FALSE	0
2022-09-14	14:11:03	0.32673	404.519	FALSE	0
2022-09-14	14:11:03	0.322099	404.841	FALSE	0
2022-09-14	14:11:03	0.316501	405.158	FALSE	0
2022-09-14	14:11:04	0.32098	405.479	FALSE	0
2022-09-14	14:11:04	0.314364	405.793	FALSE	0
2022-09-14	14:11:04	0.307901	406.101	FALSE	0
2022-09-14	14:11:04	0.310395	406.412	FALSE	0
2022-09-14	14:11:05	0.306272	406.718	FALSE	0
2022-09-14	14:11:05	0.301031	407.019	FALSE	0
2022-09-14	14:11:05	0.304542	407.323	FALSE	0
2022-09-14	14:11:05	0.293804	407.617	FALSE	0
2022-09-14	14:11:06	0.297265	407.915	FALSE	0
2022-09-14	14:11:06	0.293244	408.208	FALSE	0
2022-09-14	14:11:06	0.280115	408.488	FALSE	0
2022-09-14	14:11:06	0.280064	408.768	FALSE	0
2022-09-14	14:11:07	0.275076	409.043	FALSE	0
2022-09-14	14:11:07	0.277621	409.321	FALSE	0
2022-09-14	14:11:07	0.28098	409.602	FALSE	0
2022-09-14	14:11:08	0.280267	409.882	FALSE	0
2022-09-14	14:11:08	0.288766	410.171	FALSE	0
2022-09-14	14:11:08	0.283117	410.454	FALSE	0
2022-09-14	14:11:08	0.279504	410.733	FALSE	0
2022-09-14	14:11:09	0.274059	411.007	FALSE	0
2022-09-14	14:11:09	0.262048	411.269	FALSE	0
2022-09-14	14:11:09	0.259809	411.529	FALSE	0
2022-09-14	14:11:09	0.265611	411.795	FALSE	0
2022-09-14	14:11:10	0.259097	412.054	FALSE	0
2022-09-14	14:11:10	0.26383	412.318	FALSE	0
2022-09-14	14:11:10	0.258588	412.576	FALSE	0
2022-09-14	14:11:10	0.272226	412.849	FALSE	0
2022-09-14	14:11:11	0.282099	413.131	FALSE	0
2022-09-14	14:11:11	0.290598	413.421	FALSE	0
2022-09-14	14:11:11	0.305916	413.727	FALSE	0
2022-09-14	14:11:12	0.308512	414.036	FALSE	0
2022-09-14	14:11:12	0.319555	414.355	FALSE	0
2022-09-14	14:11:12	0.335789	414.691	FALSE	0
2022-09-14	14:11:12	0.336349	415.027	FALSE	0
2022-09-14	14:11:13	0.340675	415.368	FALSE	0
2022-09-14	14:11:13	0.341285	415.709	FALSE	0
2022-09-14	14:11:13	0.345814	416.055	FALSE	0
2022-09-14	14:11:13	0.359555	416.415	FALSE	0
2022-09-14	14:11:14	0.360115	416.775	FALSE	0
2022-09-14	14:11:14	0.364339	417.139	FALSE	0
2022-09-14	14:11:14	0.364339	417.503	FALSE	0
2022-09-14	14:11:14	0.361743	417.865	FALSE	0
2022-09-14	14:11:15	0.372277	418.238	FALSE	0
2022-09-14	14:11:15	0.380929	418.618	FALSE	0
2022-09-14	14:11:15	0.380929	418.999	FALSE	0
2022-09-14	14:11:16	0.382557	419.382	FALSE	0
2022-09-14	14:11:16	0.389529	419.771	FALSE	0
2022-09-14	14:11:16	0.395076	420.167	FALSE	0
2022-09-14	14:11:16	0.409173	420.576	FALSE	0
2022-09-14	14:11:17	0.419758	420.995	FALSE	0
2022-09-14	14:11:17	0.445611	421.441	FALSE	0
2022-09-14	14:11:17	0.460115	421.901	FALSE	0
2022-09-14	14:11:17	0.474466	422.376	FALSE	0
2022-09-14	14:11:18	0.483677	422.859	FALSE	0
2022-09-14	14:11:18	0.478435	423.338	FALSE	0
2022-09-14	14:11:18	0.532379	423.87	FALSE	0
2022-09-14	14:11:18	0.51187	424.382	FALSE	0
2022-09-14	14:11:19	0.488206	424.87	FALSE	0
2022-09-14	14:11:19	0.458333	425.329	FALSE	0
2022-09-14	14:11:19	0.437774	425.766	FALSE	0
2022-09-14	14:11:20	0.451972	426.218	FALSE	0
2022-09-14	14:11:20	0.454975	426.673	FALSE	0
2022-09-14	14:11:20	0.437977	427.111	FALSE	0
2022-09-14	14:11:20	0.384491	427.496	FALSE	0
2022-09-14	14:11:21	0.430089	427.926	FALSE	0
2022-09-14	14:11:21	0.43528	428.361	FALSE	0
2022-09-14	14:11:21	0.446272	428.807	FALSE	0
2022-09-14	14:11:21	0.442863	429.25	FALSE	0
2022-09-14	14:11:22	0.41243	429.663	FALSE	0
2022-09-14	14:11:22	0.137672	429.8	FALSE	0
2022-09-14	14:11:22	0.434568	430.235	FALSE	0
2022-09-14	14:11:22	0.28215	430.517	FALSE	0
2022-09-14	14:11:23	-0.221819	430.517	FALSE	0
2022-09-14	14:11:23	0.365662	430.883	FALSE	0
2022-09-14	14:11:23	0.386222	431.269	FALSE	0
2022-09-14	14:11:24	0.742506	432.011	FALSE	0
2022-09-14	14:11:24	0.730445	432.742	FALSE	0
2022-09-14	14:11:24	0.729326	433.471	FALSE	0
2022-09-14	14:11:24	0.73874	434.21	FALSE	0
2022-09-14	14:11:25	0.732074	434.942	FALSE	0
2022-09-14	14:11:25	0.73645	435.678	FALSE	0
2022-09-14	14:11:25	0.734618	436.413	FALSE	0
2022-09-14	14:11:25	0.736807	437.15	FALSE	0
2022-09-14	14:11:26	0.737214	437.887	FALSE	0
2022-09-14	14:11:26	0.740064	438.627	FALSE	0
2022-09-14	14:11:26	0.738181	439.365	FALSE	0
2022-09-14	14:11:26	0.73472	440.1	FALSE	0
2022-09-14	14:11:27	0.728919	440.829	FALSE	0
2022-09-14	14:11:27	0.73355	441.563	FALSE	0
2022-09-14	14:11:27	0.731209	442.294	FALSE	0
2022-09-14	14:11:28	0.684491	442.978	FALSE	0
2022-09-14	14:11:28	0.723219	443.701	FALSE	0
2022-09-14	14:11:28	0.72103	444.423	FALSE	0
2022-09-14	14:11:28	0.716908	445.139	FALSE	0
2022-09-14	14:11:29	0.729987	445.869	FALSE	0
2022-09-14	14:11:29	0.724135	446.594	FALSE	0
2022-09-14	14:11:29	0.730191	447.324	FALSE	0
2022-09-14	14:11:29	0.722761	448.047	FALSE	0
2022-09-14	14:11:30	0.730293	448.777	FALSE	0
2022-09-14	14:11:30	0.730445	449.507	FALSE	0
2022-09-14	14:11:30	0.732939	450.24	FALSE	0
2022-09-14	14:11:30	0.722659	450.963	FALSE	0
2022-09-14	14:11:31	0.722608	451.685	FALSE	0
2022-09-14	14:11:31	0.727188	452.413	FALSE	0
2022-09-14	14:11:31	0.73014	453.143	FALSE	0
2022-09-14	14:11:32	0.727188	453.87	FALSE	0
2022-09-14	14:11:32	0.72841	454.598	FALSE	0
2022-09-14	14:11:32	0.733804	455.332	FALSE	0
2022-09-14	14:11:32	0.723677	456.056	FALSE	0
2022-09-14	14:11:33	0.73243	456.788	FALSE	0
2022-09-14	14:11:33	0.726425	457.515	FALSE	0
2022-09-14	14:11:33	0.729071	458.244	FALSE	0
2022-09-14	14:11:33	0.727952	458.972	FALSE	0
2022-09-14	14:11:34	0.725153	459.697	FALSE	0
2022-09-14	14:11:34	0.730038	460.427	FALSE	0
2022-09-14	14:11:34	0.720369	461.147	FALSE	0
2022-09-14	14:11:34	0.736094	461.883	FALSE	0
2022-09-14	14:11:35	0.725509	462.609	FALSE	0
2022-09-14	14:11:35	0.730954	463.34	FALSE	0
2022-09-14	14:11:35	0.733702	464.074	FALSE	0
2022-09-14	14:11:36	0.723982	464.798	FALSE	0
2022-09-14	14:11:36	0.729071	465.527	FALSE	0
2022-09-14	14:11:36	0.728613	466.255	FALSE	0
2022-09-14	14:11:36	0.730649	466.986	FALSE	0
2022-09-14	14:11:37	0.726883	467.713	FALSE	0
2022-09-14	14:11:37	0.731667	468.444	FALSE	0
2022-09-14	14:11:37	0.725763	469.17	FALSE	0
2022-09-14	14:11:37	0.730852	469.901	FALSE	0
2022-09-14	14:11:38	0.508054	470.409	FALSE	0
2022-09-14	14:11:38	0.574924	470.984	FALSE	0
2022-09-14	14:11:38	0.686018	471.67	FALSE	0
2022-09-14	14:11:38	0.734262	472.404	FALSE	0
2022-09-14	14:11:39	0.732125	473.136	FALSE	0
2022-09-14	14:11:39	0.740573	473.877	FALSE	0
2022-09-14	14:11:39	0.737773	474.615	FALSE	0
2022-09-14	14:11:40	0.731209	475.346	FALSE	0
2022-09-14	14:11:40	0.737315	476.083	FALSE	0
2022-09-14	14:11:40	0.737926	476.821	FALSE	0
2022-09-14	14:11:40	0.726374	477.548	FALSE	0
2022-09-14	14:11:41	0.734415	478.282	FALSE	0
2022-09-14	14:11:41	0.73243	479.014	FALSE	0
2022-09-14	14:11:41	0.732023	479.746	FALSE	0
2022-09-14	14:11:41	0.728461	480.475	FALSE	0
2022-09-14	14:11:42	0.731005	481.206	FALSE	0
2022-09-14	14:11:42	0.726679	481.933	FALSE	0
2022-09-14	14:11:42	0.725712	482.658	FALSE	0
2022-09-14	14:11:42	0.734364	483.393	FALSE	0
2022-09-14	14:11:43	0.736908	484.13	FALSE	0
2022-09-14	14:11:43	0.735941	484.866	FALSE	0
2022-09-14	14:11:43	0.731412	485.597	FALSE	0
2022-09-14	14:11:44	0.732175	486.329	FALSE	0
2022-09-14	14:11:44	0.732328	487.061	FALSE	0
2022-09-14	14:11:44	0.734517	487.796	FALSE	0
2022-09-14	14:11:44	0.732888	488.529	FALSE	0
2022-09-14	14:11:45	0.737417	489.266	FALSE	0
2022-09-14	14:11:45	0.725305	489.992	FALSE	0
2022-09-14	14:11:45	0.736552	490.728	FALSE	0
2022-09-14	14:11:45	0.733906	491.462	FALSE	0
2022-09-14	14:11:46	0.734568	492.197	FALSE	0
2022-09-14	14:11:46	0.732583	492.929	FALSE	0
2022-09-14	14:11:46	0.729936	493.659	FALSE	0
2022-09-14	14:11:46	0.734466	494.394	FALSE	0
2022-09-14	14:11:47	0.732939	495.127	FALSE	0
2022-09-14	14:11:47	0.733601	495.86	FALSE	0
2022-09-14	14:11:47	0.734517	496.595	FALSE	0
2022-09-14	14:11:48	0.734771	497.329	FALSE	0
2022-09-14	14:11:48	0.729428	498.059	FALSE	0
2022-09-14	14:11:48	0.72556	498.784	FALSE	0
2022-09-14	14:11:48	0.734924	499.519	FALSE	0
2022-09-14	14:11:49	0.730089	500.249	FALSE	0
2022-09-14	14:11:49	0.73416	500.984	FALSE	0
2022-09-14	14:11:49	0.734313	501.718	FALSE	0
2022-09-14	14:11:49	0.73243	502.45	FALSE	0
2022-09-14	14:11:50	0.7307	503.181	FALSE	0
2022-09-14	14:11:50	0.740318	503.921	FALSE	0
2022-09-14	14:11:50	0.733957	504.655	FALSE	0
2022-09-14	14:11:50	0.733651	505.389	FALSE	0
2022-09-14	14:11:51	0.73299	506.122	FALSE	0
2022-09-14	14:11:51	0.732481	506.854	FALSE	0
2022-09-14	14:11:51	0.736349	507.591	FALSE	0
2022-09-14	14:11:52	0.735026	508.326	FALSE	0
2022-09-14	14:11:52	0.732277	509.058	FALSE	0
2022-09-14	14:11:52	0.733601	509.792	FALSE	0
2022-09-14	14:11:52	0.737061	510.529	FALSE	0
2022-09-14	14:11:53	0.736349	511.265	FALSE	0
2022-09-14	14:11:53	0.739046	512.004	FALSE	0
2022-09-14	14:11:53	0.723372	512.727	FALSE	0
2022-09-14	14:11:53	0.738282	513.466	FALSE	0
2022-09-14	14:11:54	0.727952	514.194	FALSE	0
2022-09-14	14:11:54	0.727646	514.921	FALSE	0
2022-09-14	14:11:54	0.732328	515.654	FALSE	0
2022-09-14	14:11:54	0.73472	516.388	FALSE	0
2022-09-14	14:11:55	0.729224	517.118	FALSE	0
2022-09-14	14:11:55	0.731819	517.849	FALSE	0
2022-09-14	14:11:55	0.735738	518.585	FALSE	0
2022-09-14	14:11:56	0.726934	519.312	FALSE	0
2022-09-14	14:11:56	0.731412	520.044	FALSE	0
2022-09-14	14:11:56	0.732277	520.776	FALSE	0
2022-09-14	14:11:56	0.733193	521.509	FALSE	0
2022-09-14	14:11:57	0.737621	522.247	FALSE	0
2022-09-14	14:11:57	0.73528	522.982	FALSE	0
2022-09-14	14:11:57	0.729886	523.712	FALSE	0
2022-09-14	14:11:57	0.732125	524.444	FALSE	0
2022-09-14	14:11:58	0.734517	525.178	FALSE	0
2022-09-14	14:11:58	0.733499	525.912	FALSE	0
2022-09-14	14:11:58	0.727901	526.64	FALSE	0
2022-09-14	14:11:58	0.732481	527.372	FALSE	0
2022-09-14	14:11:59	0.729631	528.102	FALSE	0
2022-09-14	14:11:59	0.737672	528.84	FALSE	0
2022-09-14	14:11:59	0.730394	529.57	FALSE	0
2022-09-14	14:12:00	0.735738	530.306	FALSE	0
2022-09-14	14:12:00	0.726425	531.032	FALSE	0
2022-09-14	14:12:00	0.732837	531.765	FALSE	0
2022-09-14	14:12:00	0.734924	532.5	FALSE	0
2022-09-14	14:12:01	0.728613	533.229	FALSE	0
2022-09-14	14:12:01	0.734466	533.963	FALSE	0
2022-09-14	14:12:01	0.72958	534.693	FALSE	0
2022-09-14	14:12:01	0.731819	535.424	FALSE	0
2022-09-14	14:12:02	0.731616	536.156	FALSE	0
2022-09-14	14:12:02	0.736298	536.892	FALSE	0
2022-09-14	14:12:02	0.728919	537.621	FALSE	0
2022-09-14	14:12:02	0.737773	538.359	FALSE	0
2022-09-14	14:12:03	0.730191	539.089	FALSE	0
2022-09-14	14:12:03	0.730751	539.82	FALSE	0
2022-09-14	14:12:03	0.7307	540.551	FALSE	0
2022-09-14	14:12:04	0.735992	541.287	FALSE	0
2022-09-14	14:12:04	0.7393	542.026	FALSE	0
2022-09-14	14:12:04	0.734313	542.76	FALSE	0
2022-09-14	14:12:04	0.736857	543.497	FALSE	0
2022-09-14	14:12:05	0.732634	544.23	FALSE	0
2022-09-14	14:12:05	0.734211	544.964	FALSE	0
2022-09-14	14:12:05	0.723422	545.687	FALSE	0
2022-09-14	14:12:05	0.729224	546.417	FALSE	0
2022-09-14	14:12:06	0.732684	547.149	FALSE	0
2022-09-14	14:12:06	0.736552	547.886	FALSE	0
2022-09-14	14:12:06	0.735738	548.622	FALSE	0
2022-09-14	14:12:06	0.739046	549.361	FALSE	0
2022-09-14	14:12:07	0.738486	550.099	FALSE	0
2022-09-14	14:12:07	0.72383	550.823	FALSE	0
2022-09-14	14:12:07	0.735891	551.559	FALSE	0
2022-09-14	14:12:08	0.732226	552.291	FALSE	0
2022-09-14	14:12:08	0.588511	552.88	FALSE	0
2022-09-14	14:12:08	0.448053	553.328	FALSE	0
2022-09-14	14:12:08	0.446985	553.775	FALSE	0
2022-09-14	14:12:09	0.228359	554.003	FALSE	0
2022-09-14	14:12:09	0.313295	554.316	FALSE	0
2022-09-14	14:12:09	0.737926	555.054	FALSE	0
2022-09-14	14:12:09	0.732481	555.787	FALSE	0
2022-09-14	14:12:10	0.734262	556.521	FALSE	0
2022-09-14	14:12:10	0.731463	557.252	FALSE	0
2022-09-14	14:12:10	0.622913	557.875	FALSE	0
2022-09-14	14:12:10	0.569479	558.445	FALSE	0
2022-09-14	14:12:11	0.563931	559.009	FALSE	0
2022-09-14	14:12:11	0.412786	559.422	FALSE	0
2022-09-14	14:12:11	0.356807	559.778	FALSE	0
2022-09-14	14:12:12	0.199708	559.978	FALSE	0
2022-09-14	14:12:12	0.204644	560.183	FALSE	0
2022-09-14	14:12:12	0.215585	560.398	FALSE	0
2022-09-14	14:12:12	0.212939	560.611	FALSE	0
2022-09-14	14:12:13	0.215178	560.826	FALSE	0
2022-09-14	14:12:13	0.534771	561.361	FALSE	0
2022-09-14	14:12:13	0.739046	562.1	FALSE	0
2022-09-14	14:12:13	0.734517	562.835	FALSE	0
2022-09-14	14:12:14	0.737672	563.572	FALSE	0
2022-09-14	14:12:14	0.733702	564.306	FALSE	0
2022-09-14	14:12:14	0.734313	565.04	FALSE	0
2022-09-14	14:12:14	0.734059	565.774	FALSE	0
2022-09-14	14:12:15	0.730496	566.505	FALSE	0
2022-09-14	14:12:15	0.731717	567.237	FALSE	0
2022-09-14	14:12:15	0.732786	567.969	FALSE	0
2022-09-14	14:12:16	0.728359	568.698	FALSE	0
2022-09-14	14:12:16	0.736298	569.434	FALSE	0
2022-09-14	14:12:16	0.729377	570.163	FALSE	0
2022-09-14	14:12:16	0.733702	570.897	FALSE	0
2022-09-14	14:12:17	0.731412	571.629	FALSE	0
2022-09-14	14:12:17	0.732837	572.361	FALSE	0
2022-09-14	14:12:17	0.733295	573.095	FALSE	0
2022-09-14	14:12:17	0.73014	573.825	FALSE	0
2022-09-14	14:12:18	0.734262	574.559	FALSE	0
2022-09-14	14:12:18	0.730598	575.29	FALSE	0
2022-09-14	14:12:18	0.729784	576.02	FALSE	0
2022-09-14	14:12:18	0.735789	576.755	FALSE	0
2022-09-14	14:12:19	0.731209	577.487	FALSE	0
2022-09-14	14:12:19	0.73528	578.222	FALSE	0
2022-09-14	14:12:19	0.730343	578.952	FALSE	0
2022-09-14	14:12:20	0.735178	579.687	FALSE	0
2022-09-14	14:12:20	0.733957	580.421	FALSE	0
2022-09-14	14:12:20	0.725865	581.147	FALSE	0
2022-09-14	14:12:20	0.735534	581.883	FALSE	0
2022-09-14	14:12:21	0.733702	582.616	FALSE	0
2022-09-14	14:12:21	0.734517	583.351	FALSE	0
2022-09-14	14:12:21	0.726374	584.077	FALSE	0
2022-09-14	14:12:21	0.736349	584.814	FALSE	0
2022-09-14	14:12:22	0.735076	585.549	FALSE	0
2022-09-14	14:12:22	0.730242	586.279	FALSE	0
2022-09-14	14:12:22	0.731819	587.011	FALSE	0
2022-09-14	14:12:22	0.732226	587.743	FALSE	0
2022-09-14	14:12:23	0.73472	588.478	FALSE	0
2022-09-14	14:12:23	0.731565	589.209	FALSE	0
2022-09-14	14:12:23	0.731921	589.941	FALSE	0
2022-09-14	14:12:24	0.741387	590.683	FALSE	0
2022-09-14	14:12:24	0.732532	591.415	FALSE	0
2022-09-14	14:12:24	0.743219	592.158	FALSE	0
2022-09-14	14:12:24	0.634466	592.793	FALSE	0
2022-09-14	14:12:25	0.732074	593.525	FALSE	0
2022-09-14	14:12:25	0.736959	594.262	FALSE	0
2022-09-14	14:12:25	0.73131	594.993	FALSE	0
2022-09-14	14:12:25	0.727494	595.721	FALSE	0
2022-09-14	14:12:26	0.735076	596.456	FALSE	0
2022-09-14	14:12:26	0.725916	597.182	FALSE	0
2022-09-14	14:12:26	0.711616	597.893	FALSE	0
2022-09-14	14:12:26	0.88785	598.781	FALSE	0
2022-09-14	14:12:27	-0.170572	598.781	FALSE	0
2022-09-14	14:12:27	0.74042	599.522	FALSE	0
2022-09-14	14:12:27	1.1049	600.626	FALSE	0
2022-09-14	14:12:28	0.289071	600.915	FALSE	0
2022-09-14	14:12:28	0.0807254	600.996	FALSE	0
2022-09-14	14:12:28	0.358588	601.355	FALSE	0
2022-09-14	14:12:28	0.111362	601.466	FALSE	0
2022-09-14	14:12:29	0.302557	601.769	FALSE	0
2022-09-14	14:12:29	0.739249	602.508	FALSE	0
2022-09-14	14:12:29	0.7307	603.239	FALSE	0
2022-09-14	14:12:29	0.726629	603.965	FALSE	0
2022-09-14	14:12:30	0.724644	604.69	FALSE	0
2022-09-14	14:12:30	0.737417	605.427	FALSE	0
2022-09-14	14:12:30	0.74098	606.168	FALSE	0
2022-09-14	14:12:30	0.733855	606.902	FALSE	0
2022-09-14	14:12:31	0.741947	607.644	FALSE	0
2022-09-14	14:12:31	0.733397	608.378	FALSE	0
2022-09-14	14:12:31	0.735076	609.113	FALSE	0
2022-09-14	14:12:32	0.729682	609.842	FALSE	0
2022-09-14	14:12:32	0.728104	610.57	FALSE	0
2022-09-14	14:12:32	0.735382	611.306	FALSE	0
2022-09-14	14:12:32	0.732379	612.038	FALSE	0
2022-09-14	14:12:33	0.73528	612.773	FALSE	0
2022-09-14	14:12:33	0.675432	613.449	FALSE	0
2022-09-14	14:12:33	0.73874	614.188	FALSE	0
2022-09-14	14:12:33	0.740216	614.928	FALSE	0
2022-09-14	14:12:34	0.736552	615.664	FALSE	0
2022-09-14	14:12:34	0.738079	616.402	FALSE	0
2022-09-14	14:12:34	0.726221	617.129	FALSE	0
2022-09-14	14:12:34	0.727036	617.856	FALSE	0
2022-09-14	14:12:35	0.732888	618.589	FALSE	0
2022-09-14	14:12:35	0.738537	619.327	FALSE	0
2022-09-14	14:12:35	0.730496	620.058	FALSE	0
2022-09-14	14:12:36	0.435076	620.493	FALSE	0
2022-09-14	14:12:36	0.733448	621.226	FALSE	0
2022-09-14	14:12:36	0.731972	621.958	FALSE	0
2022-09-14	14:12:36	0.73874	622.697	FALSE	0
2022-09-14	14:12:37	0.728562	623.425	FALSE	0
2022-09-14	14:12:37	0.729529	624.155	FALSE	0
2022-09-14	14:12:37	0.781845	624.937	FALSE	0
2022-09-14	14:12:37	0.730293	625.667	FALSE	0
2022-09-14	14:12:38	0.731514	626.399	FALSE	0
2022-09-14	14:12:38	0.730852	627.129	FALSE	0
2022-09-14	14:12:38	0.732684	627.862	FALSE	0
2022-09-14	14:12:38	0.733193	628.595	FALSE	0
2022-09-14	14:12:39	0.730242	629.326	FALSE	0
2022-09-14	14:12:39	0.727646	630.053	FALSE	0
2022-09-14	14:12:39	0.72612	630.779	FALSE	0
2022-09-14	14:12:40	0.729122	631.508	FALSE	0
2022-09-14	14:12:40	0.734415	632.243	FALSE	0
2022-09-14	14:12:40	0.71645	632.959	FALSE	0
2022-09-14	14:12:40	0.737875	633.697	FALSE	0
2022-09-14	14:12:41	0.731819	634.429	FALSE	0
2022-09-14	14:12:41	0.731209	635.16	FALSE	0
2022-09-14	14:12:41	0.730852	635.891	FALSE	0
2022-09-14	14:12:41	0.732277	636.623	FALSE	0
2022-09-14	14:12:42	0.731921	637.355	FALSE	0
2022-09-14	14:12:42	0.730598	638.086	FALSE	0
2022-09-14	14:12:42	0.732634	638.819	FALSE	0
2022-09-14	14:12:42	0.735891	639.554	FALSE	0
2022-09-14	14:12:43	0.734008	640.288	FALSE	0
2022-09-14	14:12:43	0.734415	641.023	FALSE	0
2022-09-14	14:12:43	0.737315	641.76	FALSE	0
2022-09-14	14:12:44	0.710496	642.471	FALSE	0
2022-09-14	14:12:44	0.727392	643.198	FALSE	0
2022-09-14	14:12:44	0.688919	643.887	FALSE	0
2022-09-14	14:12:44	0.680013	644.567	FALSE	0
2022-09-14	14:12:45	0.683575	645.251	FALSE	0
2022-09-14	14:12:45	0.688359	645.939	FALSE	0
2022-09-14	14:12:45	0.679962	646.619	FALSE	0
2022-09-14	14:12:45	0.689478	647.308	FALSE	0
2022-09-14	14:12:46	0.700776	648.009	FALSE	0
2022-09-14	14:12:46	0.687443	648.697	FALSE	0
2022-09-14	14:12:46	0.729936	649.426	FALSE	0
2022-09-14	14:12:46	0.731972	650.158	FALSE	0
2022-09-14	14:12:47	0.723626	650.882	FALSE	0
2022-09-14	14:12:47	0.729936	651.612	FALSE	0
2022-09-14	14:12:47	0.740064	652.352	FALSE	0
2022-09-14	14:12:48	0.734975	653.087	FALSE	0
2022-09-14	14:12:48	0.735229	653.822	FALSE	0
2022-09-14	14:12:48	0.734008	654.556	FALSE	0
2022-09-14	14:12:48	0.72729	655.284	FALSE	0
2022-09-14	14:12:49	0.731717	656.015	FALSE	0
2022-09-14	14:12:49	0.70729	656.723	FALSE	0
2022-09-14	14:12:49	0.731259	657.454	FALSE	0
2022-09-14	14:12:49	0.735229	658.189	FALSE	0
2022-09-14	14:12:50	0.728664	658.918	FALSE	0
2022-09-14	14:12:50	0.729936	659.648	FALSE	0
2022-09-14	14:12:50	0.732837	660.381	FALSE	0
2022-09-14	14:12:50	0.726985	661.108	FALSE	0
2022-09-14	14:12:51	0.736603	661.844	FALSE	0
2022-09-14	14:12:51	0.726527	662.571	FALSE	0
2022-09-14	14:12:51	0.728868	663.3	FALSE	0
2022-09-14	14:12:52	0.730496	664.03	FALSE	0
2022-09-14	14:12:52	0.733142	664.763	FALSE	0
2022-09-14	14:12:52	0.730089	665.493	FALSE	0
2022-09-14	14:12:52	0.730649	666.224	FALSE	0
2022-09-14	14:12:53	0.729224	666.953	FALSE	0
2022-09-14	14:12:53	0.730343	667.683	FALSE	0
2022-09-14	14:12:53	0.734109	668.418	FALSE	0
2022-09-14	14:12:53	0.733041	669.151	FALSE	0
2022-09-14	14:12:54	0.733702	669.884	FALSE	0
2022-09-14	14:12:54	0.733651	670.618	FALSE	0
2022-09-14	14:12:54	0.734364	671.352	FALSE	0
2022-09-14	14:12:54	0.73131	672.084	FALSE	0
2022-09-14	14:12:55	0.733092	672.817	FALSE	0
2022-09-14	14:12:55	0.737519	673.554	FALSE	0
2022-09-14	14:12:55	0.733142	674.287	FALSE	0
2022-09-14	14:12:56	0.736043	675.023	FALSE	0
2022-09-14	14:12:56	0.735687	675.759	FALSE	0
2022-09-14	14:12:56	0.73187	676.491	FALSE	0

## Sheet: Ursula_prong_202291414738
						**GoPro Fitting: 13:56
2022-09-14	14:07:38	0.723779
2022-09-14	14:07:38	0.662354
2022-09-14	14:07:38	0.571565
2022-09-14	14:07:39	0.425916
2022-09-14	14:07:39	0.360115
2022-09-14	14:07:39	0.412786
2022-09-14	14:07:40	0.733702
2022-09-14	14:07:40	0.728766
2022-09-14	14:07:40	0.728613
2022-09-14	14:07:40	0.73584
2022-09-14	14:07:41	0.734771
2022-09-14	14:07:41	0.734211
2022-09-14	14:07:41	0.726527
2022-09-14	14:07:41	0.734109
2022-09-14	14:07:42	0.736043
2022-09-14	14:07:42	0.735229
2022-09-14	14:07:42	0.734059
2022-09-14	14:07:42	0.73187
2022-09-14	14:07:43	0.73701
2022-09-14	14:07:43	0.729886
2022-09-14	14:07:43	0.734771
2022-09-14	14:07:44	0.735585
2022-09-14	14:07:44	0.732277
2022-09-14	14:07:44	0.731972
2022-09-14	14:07:44	0.727137
2022-09-14	14:07:45	0.735076
2022-09-14	14:07:45	0.729275
2022-09-14	14:07:45	0.734975
2022-09-14	14:07:45	0.734975
2022-09-14	14:07:46	0.733702
2022-09-14	14:07:46	0.736145
2022-09-14	14:07:46	0.732837
2022-09-14	14:07:47	0.736959
2022-09-14	14:07:47	0.732786
2022-09-14	14:07:47	0.733041
2022-09-14	14:07:47	0.735483
2022-09-14	14:07:48	0.735229
2022-09-14	14:07:48	0.731361
2022-09-14	14:07:48	0.734008
2022-09-14	14:07:48	0.735738
2022-09-14	14:07:49	0.733601
2022-09-14	14:07:49	0.730852
2022-09-14	14:07:49	0.728512
2022-09-14	14:07:49	0.733753
2022-09-14	14:07:50	0.737722
2022-09-14	14:07:50	0.733295
2022-09-14	14:07:50	0.73472
2022-09-14	14:07:50	0.726832
2022-09-14	14:07:51	0.736603
2022-09-14	14:07:51	0.731768
2022-09-14	14:07:51	0.735585
2022-09-14	14:07:52	0.734517
2022-09-14	14:07:52	0.7393
2022-09-14	14:07:52	0.730038
2022-09-14	14:07:52	0.730242
2022-09-14	14:07:53	0.732023
2022-09-14	14:07:53	0.73813
2022-09-14	14:07:53	0.734568
2022-09-14	14:07:53	0.736857
2022-09-14	14:07:54	0.730038
2022-09-14	14:07:54	0.730954
2022-09-14	14:07:54	0.736094
2022-09-14	14:07:54	0.732379
2022-09-14	14:07:55	0.736145
2022-09-14	14:07:55	0.731514
2022-09-14	14:07:55	0.741336
2022-09-14	14:07:56	0.73355
2022-09-14	14:07:56	0.730191
2022-09-14	14:07:56	0.733855
2022-09-14	14:07:56	0.735127
2022-09-14	14:07:57	0.734262
2022-09-14	14:07:57	0.733753
2022-09-14	14:07:57	0.736603
2022-09-14	14:07:57	0.726679
2022-09-14	14:07:58	0.737061
2022-09-14	14:07:58	0.724084
2022-09-14	14:07:58	0.733295
2022-09-14	14:07:58	0.736196
2022-09-14	14:07:59	0.856857
2022-09-14	14:07:59	0.737875
2022-09-14	14:07:59	0.73472
2022-09-14	14:08:00	0.733499
2022-09-14	14:08:00	0.73243
2022-09-14	14:08:00	0.730751
2022-09-14	14:08:00	0.728054
2022-09-14	14:08:01	0.734975
2022-09-14	14:08:01	0.730852
2022-09-14	14:08:01	0.735382
2022-09-14	14:08:01	0.733041
2022-09-14	14:08:02	0.807901
2022-09-14	14:08:02	0.588715
2022-09-14	14:08:02	0.750649
2022-09-14	14:08:02	0.739402
2022-09-14	14:08:03	0.732786
2022-09-14	14:08:03	0.738537
2022-09-14	14:08:03	0.730903
2022-09-14	14:08:04	0.727952
2022-09-14	14:08:04	0.733499
2022-09-14	14:08:04	0.726781
2022-09-14	14:08:04	0.722354
2022-09-14	14:08:05	1.4736
2022-09-14	14:08:05	1.17258
2022-09-14	14:08:05	0.739402
2022-09-14	14:08:05	0.732583
2022-09-14	14:08:06	0.735178
2022-09-14	14:08:06	0.730343
2022-09-14	14:08:06	0.736959
2022-09-14	14:08:06	0.732532
2022-09-14	14:08:07	0.728664
2022-09-14	14:08:07	0.735585
2022-09-14	14:08:07	0.734517
2022-09-14	14:08:08	0.733499
2022-09-14	14:08:08	0.730191
2022-09-14	14:08:08	0.738028
2022-09-14	14:08:08	0.732277
2022-09-14	14:08:09	0.733244
2022-09-14	14:08:09	0.733651
2022-09-14	14:08:09	0.729936
2022-09-14	14:08:09	0.731209
2022-09-14	14:08:10	0.73187
2022-09-14	14:08:10	0.729428
2022-09-14	14:08:10	0.737824
2022-09-14	14:08:10	0.730038
2022-09-14	14:08:11	0.729784
2022-09-14	14:08:11	0.739707
2022-09-14	14:08:11	0.735127
2022-09-14	14:08:12	0.734415
2022-09-14	14:08:12	0.733753
2022-09-14	14:08:12	0.731921
2022-09-14	14:08:12	0.540165
2022-09-14	14:08:13	0.718435
2022-09-14	14:08:13	0.731972
2022-09-14	14:08:13	0.733957
2022-09-14	14:08:13	0.733906
2022-09-14	14:08:14	0.735483
2022-09-14	14:08:14	0.735483
2022-09-14	14:08:14	0.73701
2022-09-14	14:08:14	0.725458
2022-09-14	14:08:15	0.73299
2022-09-14	14:08:15	0.734313
2022-09-14	14:08:15	0.733448
2022-09-14	14:08:16	0.728308
2022-09-14	14:08:16	0.738384
2022-09-14	14:08:16	0.73757
2022-09-14	14:08:16	0.738689
2022-09-14	14:08:17	0.727036
2022-09-14	14:08:17	0.748613
2022-09-14	14:08:17	0.725814
2022-09-14	14:08:17	0.728003
2022-09-14	14:08:18	0.738181
2022-09-14	14:08:18	0.669631
2022-09-14	14:08:18	-0.385279
2022-09-14	14:08:18	-0.00197174
2022-09-14	14:08:19	0.711718
2022-09-14	14:08:19	0.727494
2022-09-14	14:08:19	0.728359
2022-09-14	14:08:20	0.728308
2022-09-14	14:08:20	0.735789
2022-09-14	14:08:20	0.731005
2022-09-14	14:08:20	0.733651
2022-09-14	14:08:21	0.729122
2022-09-14	14:08:21	0.736756
2022-09-14	14:08:21	0.738028
2022-09-14	14:08:21	0.735026
2022-09-14	14:08:22	0.733295
2022-09-14	14:08:22	0.729377
2022-09-14	14:08:22	0.734059
2022-09-14	14:08:22	0.740216
2022-09-14	14:08:23	0.739097
2022-09-14	14:08:23	0.757316
2022-09-14	14:08:23	0.762506
2022-09-14	14:08:24	0.731412
2022-09-14	14:08:24	0.728613
2022-09-14	14:08:24	0.735026
2022-09-14	14:08:24	0.735229
2022-09-14	14:08:25	0.732735
2022-09-14	14:08:25	0.727341
2022-09-14	14:08:25	0.735483
2022-09-14	14:08:25	0.735483
2022-09-14	14:08:26	0.729428
2022-09-14	14:08:26	0.537926
2022-09-14	14:08:26	0.725458
2022-09-14	14:08:26	0.72897
2022-09-14	14:08:27	0.732277
2022-09-14	14:08:27	0.733601
2022-09-14	14:08:27	0.727545
2022-09-14	14:08:28	0.789987
2022-09-14	14:08:28	2.45803
2022-09-14	14:08:28	0.734364
2022-09-14	14:08:28	0.734618
2022-09-14	14:08:29	0.739402
2022-09-14	14:08:29	0.737875
2022-09-14	14:08:29	0.739198
2022-09-14	14:08:29	0.737468
2022-09-14	14:08:30	0.734873
2022-09-14	14:08:30	0.732532
2022-09-14	14:08:30	1.06403
2022-09-14	14:08:30	0.775992
2022-09-14	14:08:31	0.734568
2022-09-14	14:08:31	0.735738
2022-09-14	14:08:31	0.733601
2022-09-14	14:08:32	0.730394
2022-09-14	14:08:32	0.730852
2022-09-14	14:08:32	0.736857
2022-09-14	14:08:32	0.732837
2022-09-14	14:08:33	0.731768
2022-09-14	14:08:33	0.73187
2022-09-14	14:08:33	0.738689
2022-09-14	14:08:33	0.740929
2022-09-14	14:08:34	0.736349
2022-09-14	14:08:34	0.738028
2022-09-14	14:08:34	0.733499
2022-09-14	14:08:34	0.732481
2022-09-14	14:08:35	0.728613
2022-09-14	14:08:35	0.728664
2022-09-14	14:08:35	0.736654
2022-09-14	14:08:36	0.728868
2022-09-14	14:08:36	0.730852
2022-09-14	14:08:36	0.731463
2022-09-14	14:08:36	0.735585
2022-09-14	14:08:37	0.738028
2022-09-14	14:08:37	0.739606
2022-09-14	14:08:37	0.732735
2022-09-14	14:08:38	0.735534
2022-09-14	14:08:38	0.735483
2022-09-14	14:08:38	0.732888
2022-09-14	14:08:38	0.729936
2022-09-14	14:08:38	0.733601
2022-09-14	14:08:39	0.737468
2022-09-14	14:08:39	0.73187
2022-09-14	14:08:39	0.734415
2022-09-14	14:08:40	0.72841
2022-09-14	14:08:40	0.72897
2022-09-14	14:08:40	0.736908
2022-09-14	14:08:40	0.735534
2022-09-14	14:08:41	0.735127
2022-09-14	14:08:41	0.737366
2022-09-14	14:08:41	0.73416
2022-09-14	14:08:41	0.728054
2022-09-14	14:08:42	0.729682
2022-09-14	14:08:42	0.728054
2022-09-14	14:08:42	0.726832
2022-09-14	14:08:42	0.728868
2022-09-14	14:08:43	0.732481
2022-09-14	14:08:43	0.729733
2022-09-14	14:08:43	0.729987
2022-09-14	14:08:44	0.730343
2022-09-14	14:08:44	0.733092
2022-09-14	14:08:44	0.734618
2022-09-14	14:08:44	0.731158
2022-09-14	14:08:45	0.729275
2022-09-14	14:08:45	0.727392
2022-09-14	14:08:45	0.729377
2022-09-14	14:08:45	0.731565
2022-09-14	14:08:46	0.739911
2022-09-14	14:08:46	0.730903
2022-09-14	14:08:46	0.735026
2022-09-14	14:08:46	0.734262
2022-09-14	14:08:47	0.728461
2022-09-14	14:08:47	0.731158
2022-09-14	14:08:47	0.725712
2022-09-14	14:08:48	0.738231
2022-09-14	14:08:48	0.726476
2022-09-14	14:08:48	0.729682
2022-09-14	14:08:48	0.736247
2022-09-14	14:08:49	0.728155
2022-09-14	14:08:49	0.733753
2022-09-14	14:08:49	0.731056
2022-09-14	14:08:49	0.731514
2022-09-14	14:08:50	0.736043
2022-09-14	14:08:50	0.731972
2022-09-14	14:08:50	0.732735
2022-09-14	14:08:50	0.734262
2022-09-14	14:08:51	0.728766
2022-09-14	14:08:51	0.732125
2022-09-14	14:08:51	0.728003
2022-09-14	14:08:52	0.73187
2022-09-14	14:08:52	0.728359
2022-09-14	14:08:52	0.727036
2022-09-14	14:08:52	0.732379
2022-09-14	14:08:53	0.731768
2022-09-14	14:08:53	0.726781
2022-09-14	14:08:53	0.732277
2022-09-14	14:08:53	0.737824
2022-09-14	14:08:54	0.732939
2022-09-14	14:08:54	0.728919
2022-09-14	14:08:54	0.730649
2022-09-14	14:08:54	0.733295
2022-09-14	14:08:55	0.732125
2022-09-14	14:08:55	0.729326
2022-09-14	14:08:55	0.732175
2022-09-14	14:08:56	0.7307
2022-09-14	14:08:56	0.74444
2022-09-14	14:08:56	0.743575
2022-09-14	14:08:56	0.730394
2022-09-14	14:08:57	0.692939
2022-09-14	14:08:57	0.649275
2022-09-14	14:08:57	0.536603
2022-09-14	14:08:57	0.37416
2022-09-14	14:08:58	-0.160598
2022-09-14	14:08:58	-0.386653
2022-09-14	14:08:58	-0.321412
2022-09-14	14:08:58	-0.313066
2022-09-14	14:08:59	-0.0281295
2022-09-14	14:08:59	0.692532
2022-09-14	14:08:59	0.730751
2022-09-14	14:09:00	0.684084
2022-09-14	14:09:00	0.706679
2022-09-14	14:09:00	0.636603
2022-09-14	14:09:00	0.636552
2022-09-14	14:09:01	0.732583
2022-09-14	14:09:01	0.554059
2022-09-14	14:09:01	0.681794
2022-09-14	14:09:01	0.483117
2022-09-14	14:09:02	0.607901
2022-09-14	14:09:02	0.758384
2022-09-14	14:09:02	0.725458
2022-09-14	14:09:02	0.640725
2022-09-14	14:09:03	0.517163
2022-09-14	14:09:03	0.785254
2022-09-14	14:09:03	0.618893
2022-09-14	14:09:04	0.54042
2022-09-14	14:09:04	0.491921
2022-09-14	14:09:04	0.463982
2022-09-14	14:09:04	0.426323
2022-09-14	14:09:05	0.433804
2022-09-14	14:09:05	0.431361
2022-09-14	14:09:05	0.409529
2022-09-14	14:09:05	0.40215
2022-09-14	14:09:06	0.395942
2022-09-14	14:09:06	0.397214
2022-09-14	14:09:06	0.398537
2022-09-14	14:09:06	0.398028
2022-09-14	14:09:07	0.391463
2022-09-14	14:09:07	0.376858
2022-09-14	14:09:07	0.343728
2022-09-14	14:09:08	0.345255
2022-09-14	14:09:08	0.353702
2022-09-14	14:09:08	0.34383
2022-09-14	14:09:08	0.355942
2022-09-14	14:09:09	0.350293
2022-09-14	14:09:09	0.368766
2022-09-14	14:09:09	2.84719
2022-09-14	14:09:09	2.19645
2022-09-14	14:09:10	0.761387
2022-09-14	14:09:10	0.706679
2022-09-14	14:09:10	0.696247
2022-09-14	14:09:10	0.690852
2022-09-14	14:09:11	0.665611
2022-09-14	14:09:11	0.637417
2022-09-14	14:09:11	-0.455
2022-09-14	14:09:12	-0.561513
2022-09-14	14:09:12	-0.542124
2022-09-14	14:09:12	-0.225381
2022-09-14	14:09:12	0.200471
2022-09-14	14:09:13	0.238028
2022-09-14	14:09:13	0.195076
2022-09-14	14:09:13	0.199097
2022-09-14	14:09:13	0.0443895
2022-09-14	14:09:14	0.187952
2022-09-14	14:09:14	-0.158613
2022-09-14	14:09:14	-0.289503
2022-09-14	14:09:14	-0.0268572
2022-09-14	14:09:15	-0.371488
2022-09-14	14:09:15	-0.562582
2022-09-14	14:09:15	-0.569554
2022-09-14	14:09:16	-0.480343
2022-09-14	14:09:16	-0.569758
2022-09-14	14:09:16	-0.436068
2022-09-14	14:09:16	-0.437646
2022-09-14	14:09:17	-0.275712
2022-09-14	14:09:17	-0.350725
2022-09-14	14:09:17	-0.242684
2022-09-14	14:09:17	-0.119325
2022-09-14	14:09:18	-0.213626
2022-09-14	14:09:18	-0.209962
2022-09-14	14:09:18	-0.200241
2022-09-14	14:09:18	-0.364618
2022-09-14	14:09:19	-0.482073
2022-09-14	14:09:19	-0.443804
2022-09-14	14:09:19	-0.386653
2022-09-14	14:09:20	-0.392862
2022-09-14	14:09:20	-0.300547
2022-09-14	14:09:20	0.0383845
2022-09-14	14:09:20	0.00754479
2022-09-14	14:09:21	-0.101972
2022-09-14	14:09:21	-0.211895
2022-09-14	14:09:21	-0.323753
2022-09-14	14:09:21	-0.368486
2022-09-14	14:09:22	-0.302073
2022-09-14	14:09:22	-0.286501
2022-09-14	14:09:22	-0.179987
2022-09-14	14:09:22	-0.145585
2022-09-14	14:09:23	-0.238308
2022-09-14	14:09:23	-0.332811
2022-09-14	14:09:23	-0.406908
2022-09-14	14:09:24	-0.326246
2022-09-14	14:09:24	-0.280241
2022-09-14	14:09:24	-0.253422
2022-09-14	14:09:24	-0.205229
2022-09-14	14:09:25	-0.00207355
2022-09-14	14:09:25	-0.0800379
2022-09-14	14:09:25	0.0642878
2022-09-14	14:09:25	2.04011
2022-09-14	14:09:26	2.95075
2022-09-14	14:09:26	0.55187
2022-09-14	14:09:26	0.458232
2022-09-14	14:09:26	0.372176
2022-09-14	14:09:27	0.277723
2022-09-14	14:09:27	0.15757
2022-09-14	14:09:27	0.0119723
2022-09-14	14:09:28	-0.0988165
2022-09-14	14:09:28	0.531565
2022-09-14	14:09:28	0.926781
2022-09-14	14:09:28	0.569631
2022-09-14	14:09:29	0.600369
2022-09-14	14:09:29	0.487748
2022-09-14	14:09:29	0.765458
2022-09-14	14:09:29	0.662964
2022-09-14	14:09:30	0.612277
2022-09-14	14:09:30	0.467901
2022-09-14	14:09:30	0.460471
2022-09-14	14:09:30	0.416654
2022-09-14	14:09:31	0.487137
2022-09-14	14:09:31	0.445814
2022-09-14	14:09:31	0.436705
2022-09-14	14:09:32	0.390344
2022-09-14	14:09:32	0.435127
2022-09-14	14:09:32	0.495026
2022-09-14	14:09:32	0.39701
2022-09-14	14:09:33	0.371616
2022-09-14	14:09:33	0.412227
2022-09-14	14:09:33	0.436298
2022-09-14	14:09:33	0.542659
2022-09-14	14:09:34	0.575738
2022-09-14	14:09:34	0.625
2022-09-14	14:09:34	0.661438
2022-09-14	14:09:34	0.674974
2022-09-14	14:09:35	0.581641
2022-09-14	14:09:35	0.473804
2022-09-14	14:09:35	0.510954
2022-09-14	14:09:36	0.925356
2022-09-14	14:09:36	0.788104
2022-09-14	14:09:36	0.702048
2022-09-14	14:09:36	0.677366
2022-09-14	14:09:37	0.737112
2022-09-14	14:09:37	0.781946
2022-09-14	14:09:37	0.460369
2022-09-14	14:09:37	0.470649
2022-09-14	14:09:38	0.493957
2022-09-14	14:09:38	0.364898
2022-09-14	14:09:38	0.294211
2022-09-14	14:09:38	0.257672
2022-09-14	14:09:39	0.209733
2022-09-14	14:09:39	0.387239
2022-09-14	14:09:39	0.100725
2022-09-14	14:09:40	0.263219
2022-09-14	14:09:40	0.192023
2022-09-14	14:09:40	0.358944
2022-09-14	14:09:40	0.324949
2022-09-14	14:09:41	0.638588
2022-09-14	14:09:41	0.553397
2022-09-14	14:09:41	0.544237
2022-09-14	14:09:41	0.562354
2022-09-14	14:09:42	0.425102
2022-09-14	14:09:42	0.54388
2022-09-14	14:09:42	0.37472
2022-09-14	14:09:42	0.450751
2022-09-14	14:09:43	0.434618
2022-09-14	14:09:43	0.433601
2022-09-14	14:09:43	0.441234
2022-09-14	14:09:44	0.443066
2022-09-14	14:09:44	0.408613
2022-09-14	14:09:44	0.41014
2022-09-14	14:09:44	0.388919
2022-09-14	14:09:45	0.411107
2022-09-14	14:09:45	0.39757
2022-09-14	14:09:45	0.454008
2022-09-14	14:09:45	0.516756
2022-09-14	14:09:46	0.432888
2022-09-14	14:09:46	0.425713
2022-09-14	14:09:46	0.434211
2022-09-14	14:09:46	0.447748
2022-09-14	14:09:47	0.528766
2022-09-14	14:09:47	0.315687
2022-09-14	14:09:47	1.18653
2022-09-14	14:09:48	2.97579
2022-09-14	14:09:48	1.83869
2022-09-14	14:09:48	0.735636
2022-09-14	14:09:48	0.624847
2022-09-14	14:09:49	0.449173
2022-09-14	14:09:49	0.494975
2022-09-14	14:09:49	0.598384
2022-09-14	14:09:49	0.653244
2022-09-14	14:09:50	0.710903
2022-09-14	14:09:50	0.731107
2022-09-14	14:09:50	0.730751
2022-09-14	14:09:50	0.733804
2022-09-14	14:09:51	0.729224
2022-09-14	14:09:51	0.734669
2022-09-14	14:09:51	0.730598
2022-09-14	14:09:52	0.727392
2022-09-14	14:09:52	0.734924
2022-09-14	14:09:52	0.731463
2022-09-14	14:09:52	0.749987
2022-09-14	14:09:53	0.726476
2022-09-14	14:09:53	0.730394
2022-09-14	14:09:53	0.734059
2022-09-14	14:09:53	0.735891
2022-09-14	14:09:54	0.734059
2022-09-14	14:09:54	0.735127
2022-09-14	14:09:54	0.734924
2022-09-14	14:09:54	0.734364
2022-09-14	14:09:55	0.729631
2022-09-14	14:09:55	0.730038
2022-09-14	14:09:55	0.733346
2022-09-14	14:09:56	0.736298
2022-09-14	14:09:56	0.659148
2022-09-14	14:09:56	-1.26833
2022-09-14	14:09:56	0.41187
2022-09-14	14:09:57	-0.166399
2022-09-14	14:09:57	-0.746399
2022-09-14	14:09:57	0.737977
2022-09-14	14:09:57	0.736399
2022-09-14	14:09:58	0.73584
2022-09-14	14:09:58	0.733651
2022-09-14	14:09:58	0.731005
2022-09-14	14:09:58	0.761488
2022-09-14	14:09:59	0.746883
2022-09-14	14:09:59	0.727646
2022-09-14	14:09:59	0.730293
2022-09-14	14:10:00	0.736399
2022-09-14	14:10:00	0.736399
2022-09-14	14:10:00	0.728155
2022-09-14	14:10:00	0.733295
2022-09-14	14:10:01	0.73299
2022-09-14	14:10:01	0.731565
2022-09-14	14:10:01	0.728919
2022-09-14	14:10:01	0.738486
2022-09-14	14:10:02	0.738995
2022-09-14	14:10:02	0.727239
2022-09-14	14:10:02	0.731514
2022-09-14	14:10:02	0.739147
2022-09-14	14:10:03	0.735076
2022-09-14	14:10:03	0.730954
2022-09-14	14:10:03	0.733855
2022-09-14	14:10:04	0.728461
2022-09-14	14:10:04	0.73355
2022-09-14	14:10:04	0.734873
2022-09-14	14:10:04	0.737366
2022-09-14	14:10:05	0.729224
2022-09-14	14:10:05	0.732125
2022-09-14	14:10:05	0.739707
2022-09-14	14:10:05	0.732583
2022-09-14	14:10:06	0.72958
2022-09-14	14:10:06	0.728613
2022-09-14	14:10:06	0.732175
2022-09-14	14:10:06	0.731565
2022-09-14	14:10:07	0.726985
2022-09-14	14:10:07	0.737519
2022-09-14	14:10:07	0.72612
2022-09-14	14:10:08	0.734059
2022-09-14	14:10:08	0.734517
2022-09-14	14:10:08	0.734822
2022-09-14	14:10:08	0.596501
2022-09-14	14:10:09	-0.441412
2022-09-14	14:10:09	0.728664
2022-09-14	14:10:09	0.735178
2022-09-14	14:10:09	0.735331
2022-09-14	14:10:10	0.731209
2022-09-14	14:10:10	0.733651
2022-09-14	14:10:10	0.73416
2022-09-14	14:10:10	0.738537
2022-09-14	14:10:11	0.744236
2022-09-14	14:10:11	0.735941
2022-09-14	14:10:11	0.740776
2022-09-14	14:10:12	0.73131
2022-09-14	14:10:12	0.726679
2022-09-14	14:10:12	0.732226
2022-09-14	14:10:12	0.731259
2022-09-14	14:10:13	0.732226
2022-09-14	14:10:13	0.734059
2022-09-14	14:10:13	0.624338
2022-09-14	14:10:13	0.134822
2022-09-14	14:10:14	0.172023
2022-09-14	14:10:14	0.0171631
2022-09-14	14:10:14	-0.0422262
2022-09-14	14:10:14	0.204797
2022-09-14	14:10:15	0.557112
2022-09-14	14:10:15	0.586832
2022-09-14	14:10:15	0.731463
2022-09-14	14:10:16	0.235738
2022-09-14	14:10:16	-0.340445
2022-09-14	14:10:16	-0.421157
2022-09-14	14:10:16	-0.415203
2022-09-14	14:10:17	-0.402277
2022-09-14	14:10:17	-0.409045
2022-09-14	14:10:17	-0.40075
2022-09-14	14:10:17	-0.394185
2022-09-14	14:10:18	-0.378816
2022-09-14	14:10:18	-0.393117
2022-09-14	14:10:18	-0.362429
2022-09-14	14:10:18	-0.38645
2022-09-14	14:10:19	-0.399122
2022-09-14	14:10:19	-0.384669
2022-09-14	14:10:19	-0.380852
2022-09-14	14:10:20	-0.376374
2022-09-14	14:10:20	-0.372658
2022-09-14	14:10:20	-0.382073
2022-09-14	14:10:20	-0.375407
2022-09-14	14:10:21	-0.363956
2022-09-14	14:10:21	-0.332557
2022-09-14	14:10:21	-0.313371
2022-09-14	14:10:21	-0.308944
2022-09-14	14:10:22	-0.339224
2022-09-14	14:10:22	-0.363091
2022-09-14	14:10:22	-0.362226
2022-09-14	14:10:22	-0.378104
2022-09-14	14:10:23	-0.376933
2022-09-14	14:10:23	-0.373473
2022-09-14	14:10:23	-0.368384
2022-09-14	14:10:24	-0.371539
2022-09-14	14:10:24	-0.372048
2022-09-14	14:10:24	-0.378969
2022-09-14	14:10:24	-0.37902
2022-09-14	14:10:25	-0.37505
2022-09-14	14:10:25	-0.370623
2022-09-14	14:10:25	-0.366094
2022-09-14	14:10:25	-0.357493
2022-09-14	14:10:26	-0.361564
2022-09-14	14:10:26	-0.33673
2022-09-14	14:10:26	-0.231336
2022-09-14	14:10:27	-0.345839
2022-09-14	14:10:27	-0.431946
2022-09-14	14:10:27	-0.3779
2022-09-14	14:10:27	-0.316475
2022-09-14	14:10:28	-0.454134
2022-09-14	14:10:28	-0.698969
2022-09-14	14:10:28	-0.801615
2022-09-14	14:10:28	-0.863345
2022-09-14	14:10:29	-0.581513
2022-09-14	14:10:29	-0.604211
2022-09-14	14:10:29	-0.524872
2022-09-14	14:10:29	-0.353269
2022-09-14	14:10:30	-0.169402
2022-09-14	14:10:30	-0.157799
2022-09-14	14:10:30	-0.0606995
2022-09-14	14:10:30	0.0123794
2022-09-14	14:10:31	-0.0291473
2022-09-14	14:10:31	-0.043702
2022-09-14	14:10:31	0.0296313
2022-09-14	14:10:32	-0.0107758
2022-09-14	14:10:32	-0.03444
2022-09-14	14:10:32	-0.0483331
2022-09-14	14:10:32	-0.0408013
2022-09-14	14:10:33	0.103575
2022-09-14	14:10:33	0.375585
2022-09-14	14:10:33	0.462761
2022-09-14	14:10:33	0.451514
2022-09-14	14:10:34	0.442252
2022-09-14	14:10:34	0.435585
2022-09-14	14:10:34	0.430445
2022-09-14	14:10:34	0.426527
2022-09-14	14:10:35	0.428308
2022-09-14	14:10:35	0.418944
2022-09-14	14:10:35	0.415942
2022-09-14	14:10:36	0.410242
2022-09-14	14:10:36	0.40673
2022-09-14	14:10:36	0.406781
2022-09-14	14:10:36	0.400674
2022-09-14	14:10:37	0.401234
2022-09-14	14:10:37	0.399148
2022-09-14	14:10:37	0.405407
2022-09-14	14:10:37	0.399453
2022-09-14	14:10:38	0.396959
2022-09-14	14:10:38	0.389886
2022-09-14	14:10:38	0.394059
2022-09-14	14:10:38	0.395636
2022-09-14	14:10:39	0.386832
2022-09-14	14:10:39	0.382914
2022-09-14	14:10:39	0.383422
2022-09-14	14:10:40	0.36958
2022-09-14	14:10:40	0.369835
2022-09-14	14:10:40	0.367188
2022-09-14	14:10:40	0.359199
2022-09-14	14:10:41	0.353601
2022-09-14	14:10:41	0.350598
2022-09-14	14:10:41	0.348053
2022-09-14	14:10:41	0.345509
2022-09-14	14:10:42	0.334771
2022-09-14	14:10:42	0.340675
2022-09-14	14:10:42	0.339809
2022-09-14	14:10:42	0.347646
2022-09-14	14:10:43	0.345458
2022-09-14	14:10:43	0.347494
2022-09-14	14:10:43	0.352837
2022-09-14	14:10:44	0.36042
2022-09-14	14:10:44	0.369987
2022-09-14	14:10:44	0.371158
2022-09-14	14:10:44	0.378333
2022-09-14	14:10:45	0.388308
2022-09-14	14:10:45	0.378995
2022-09-14	14:10:45	0.387036
2022-09-14	14:10:45	0.380216
2022-09-14	14:10:46	0.392532
2022-09-14	14:10:46	0.391514
2022-09-14	14:10:46	0.388766
2022-09-14	14:10:46	0.384593
2022-09-14	14:10:47	0.388257
2022-09-14	14:10:47	0.376756
2022-09-14	14:10:47	0.375687
2022-09-14	14:10:48	0.380064
2022-09-14	14:10:48	0.368308
2022-09-14	14:10:48	0.367494
2022-09-14	14:10:48	0.358232
2022-09-14	14:10:49	0.36444
2022-09-14	14:10:49	0.363931
2022-09-14	14:10:49	0.346272
2022-09-14	14:10:49	0.349071
2022-09-14	14:10:50	0.34271
2022-09-14	14:10:50	0.340878
2022-09-14	14:10:50	0.340369
2022-09-14	14:10:50	0.342252
2022-09-14	14:10:51	0.338079
2022-09-14	14:10:51	0.336247
2022-09-14	14:10:51	0.339809
2022-09-14	14:10:52	0.342812
2022-09-14	14:10:52	0.349631
2022-09-14	14:10:52	0.34841
2022-09-14	14:10:52	0.343677
2022-09-14	14:10:53	0.349428
2022-09-14	14:10:53	0.35299
2022-09-14	14:10:53	0.358181
2022-09-14	14:10:53	0.359402
2022-09-14	14:10:54	0.352939
2022-09-14	14:10:54	0.332227
2022-09-14	14:10:54	0.321031
2022-09-14	14:10:54	0.288817
2022-09-14	14:10:55	0.274771
2022-09-14	14:10:55	0.269631
2022-09-14	14:10:55	0.26327
2022-09-14	14:10:56	0.248054
2022-09-14	14:10:56	0.23813
2022-09-14	14:10:56	0.2307
2022-09-14	14:10:56	0.227392
2022-09-14	14:10:57	0.247494
2022-09-14	14:10:57	0.264288
2022-09-14	14:10:57	0.255433
2022-09-14	14:10:57	0.260929
2022-09-14	14:10:58	0.263779
2022-09-14	14:10:58	0.256959
2022-09-14	14:10:58	0.263677
2022-09-14	14:10:58	0.261132
2022-09-14	14:10:59	0.269377
2022-09-14	14:10:59	0.271005
2022-09-14	14:10:59	0.275585
2022-09-14	14:11:00	0.287494
2022-09-14	14:11:00	0.289886
2022-09-14	14:11:00	0.293855
2022-09-14	14:11:00	0.301998
2022-09-14	14:11:01	0.297875
2022-09-14	14:11:01	0.300267
2022-09-14	14:11:01	0.313397
2022-09-14	14:11:01	0.304695
2022-09-14	14:11:02	0.314109
2022-09-14	14:11:02	0.314873
2022-09-14	14:11:02	0.316247
2022-09-14	14:11:02	0.317366
2022-09-14	14:11:03	0.32673
2022-09-14	14:11:03	0.322099
2022-09-14	14:11:03	0.316501
2022-09-14	14:11:04	0.32098
2022-09-14	14:11:04	0.314364
2022-09-14	14:11:04	0.307901
2022-09-14	14:11:04	0.310395
2022-09-14	14:11:05	0.306272
2022-09-14	14:11:05	0.301031
2022-09-14	14:11:05	0.304542
2022-09-14	14:11:05	0.293804
2022-09-14	14:11:06	0.297265
2022-09-14	14:11:06	0.293244
2022-09-14	14:11:06	0.280115
2022-09-14	14:11:06	0.280064
2022-09-14	14:11:07	0.275076
2022-09-14	14:11:07	0.277621
2022-09-14	14:11:07	0.28098
2022-09-14	14:11:08	0.280267
2022-09-14	14:11:08	0.288766
2022-09-14	14:11:08	0.283117
2022-09-14	14:11:08	0.279504
2022-09-14	14:11:09	0.274059
2022-09-14	14:11:09	0.262048
2022-09-14	14:11:09	0.259809
2022-09-14	14:11:09	0.265611
2022-09-14	14:11:10	0.259097
2022-09-14	14:11:10	0.26383
2022-09-14	14:11:10	0.258588
2022-09-14	14:11:10	0.272226
2022-09-14	14:11:11	0.282099
2022-09-14	14:11:11	0.290598
2022-09-14	14:11:11	0.305916
2022-09-14	14:11:12	0.308512
2022-09-14	14:11:12	0.319555
2022-09-14	14:11:12	0.335789
2022-09-14	14:11:12	0.336349
2022-09-14	14:11:13	0.340675
2022-09-14	14:11:13	0.341285
2022-09-14	14:11:13	0.345814
2022-09-14	14:11:13	0.359555
2022-09-14	14:11:14	0.360115
2022-09-14	14:11:14	0.364339
2022-09-14	14:11:14	0.364339
2022-09-14	14:11:14	0.361743
2022-09-14	14:11:15	0.372277
2022-09-14	14:11:15	0.380929
2022-09-14	14:11:15	0.380929
2022-09-14	14:11:16	0.382557
2022-09-14	14:11:16	0.389529
2022-09-14	14:11:16	0.395076
2022-09-14	14:11:16	0.409173
2022-09-14	14:11:17	0.419758
2022-09-14	14:11:17	0.445611
2022-09-14	14:11:17	0.460115
2022-09-14	14:11:17	0.474466
2022-09-14	14:11:18	0.483677
2022-09-14	14:11:18	0.478435
2022-09-14	14:11:18	0.532379
2022-09-14	14:11:18	0.51187
2022-09-14	14:11:19	0.488206
2022-09-14	14:11:19	0.458333
2022-09-14	14:11:19	0.437774
2022-09-14	14:11:20	0.451972
2022-09-14	14:11:20	0.454975
2022-09-14	14:11:20	0.437977
2022-09-14	14:11:20	0.384491
2022-09-14	14:11:21	0.430089
2022-09-14	14:11:21	0.43528
2022-09-14	14:11:21	0.446272
2022-09-14	14:11:21	0.442863
2022-09-14	14:11:22	0.41243
2022-09-14	14:11:22	0.137672
2022-09-14	14:11:22	0.434568
2022-09-14	14:11:22	0.28215
2022-09-14	14:11:23	-0.221819
2022-09-14	14:11:23	0.365662
2022-09-14	14:11:23	0.386222
2022-09-14	14:11:24	0.742506
2022-09-14	14:11:24	0.730445
2022-09-14	14:11:24	0.729326
2022-09-14	14:11:24	0.73874
2022-09-14	14:11:25	0.732074
2022-09-14	14:11:25	0.73645
2022-09-14	14:11:25	0.734618
2022-09-14	14:11:25	0.736807
2022-09-14	14:11:26	0.737214
2022-09-14	14:11:26	0.740064
2022-09-14	14:11:26	0.738181
2022-09-14	14:11:26	0.73472
2022-09-14	14:11:27	0.728919
2022-09-14	14:11:27	0.73355
2022-09-14	14:11:27	0.731209
2022-09-14	14:11:28	0.684491
2022-09-14	14:11:28	0.723219
2022-09-14	14:11:28	0.72103
2022-09-14	14:11:28	0.716908
2022-09-14	14:11:29	0.729987
2022-09-14	14:11:29	0.724135
2022-09-14	14:11:29	0.730191
2022-09-14	14:11:29	0.722761
2022-09-14	14:11:30	0.730293
2022-09-14	14:11:30	0.730445
2022-09-14	14:11:30	0.732939
2022-09-14	14:11:30	0.722659
2022-09-14	14:11:31	0.722608
2022-09-14	14:11:31	0.727188
2022-09-14	14:11:31	0.73014
2022-09-14	14:11:32	0.727188
2022-09-14	14:11:32	0.72841
2022-09-14	14:11:32	0.733804
2022-09-14	14:11:32	0.723677
2022-09-14	14:11:33	0.73243
2022-09-14	14:11:33	0.726425
2022-09-14	14:11:33	0.729071
2022-09-14	14:11:33	0.727952
2022-09-14	14:11:34	0.725153
2022-09-14	14:11:34	0.730038
2022-09-14	14:11:34	0.720369
2022-09-14	14:11:34	0.736094
2022-09-14	14:11:35	0.725509
2022-09-14	14:11:35	0.730954
2022-09-14	14:11:35	0.733702
2022-09-14	14:11:36	0.723982
2022-09-14	14:11:36	0.729071
2022-09-14	14:11:36	0.728613
2022-09-14	14:11:36	0.730649
2022-09-14	14:11:37	0.726883
2022-09-14	14:11:37	0.731667
2022-09-14	14:11:37	0.725763
2022-09-14	14:11:37	0.730852
2022-09-14	14:11:38	0.508054
2022-09-14	14:11:38	0.574924
2022-09-14	14:11:38	0.686018
2022-09-14	14:11:38	0.734262
2022-09-14	14:11:39	0.732125
2022-09-14	14:11:39	0.740573
2022-09-14	14:11:39	0.737773
2022-09-14	14:11:40	0.731209
2022-09-14	14:11:40	0.737315
2022-09-14	14:11:40	0.737926
2022-09-14	14:11:40	0.726374
2022-09-14	14:11:41	0.734415
2022-09-14	14:11:41	0.73243
2022-09-14	14:11:41	0.732023
2022-09-14	14:11:41	0.728461
2022-09-14	14:11:42	0.731005
2022-09-14	14:11:42	0.726679
2022-09-14	14:11:42	0.725712
2022-09-14	14:11:42	0.734364
2022-09-14	14:11:43	0.736908
2022-09-14	14:11:43	0.735941
2022-09-14	14:11:43	0.731412
2022-09-14	14:11:44	0.732175
2022-09-14	14:11:44	0.732328
2022-09-14	14:11:44	0.734517
2022-09-14	14:11:44	0.732888
2022-09-14	14:11:45	0.737417
2022-09-14	14:11:45	0.725305
2022-09-14	14:11:45	0.736552
2022-09-14	14:11:45	0.733906
2022-09-14	14:11:46	0.734568
2022-09-14	14:11:46	0.732583
2022-09-14	14:11:46	0.729936
2022-09-14	14:11:46	0.734466
2022-09-14	14:11:47	0.732939
2022-09-14	14:11:47	0.733601
2022-09-14	14:11:47	0.734517
2022-09-14	14:11:48	0.734771
2022-09-14	14:11:48	0.729428
2022-09-14	14:11:48	0.72556
2022-09-14	14:11:48	0.734924
2022-09-14	14:11:49	0.730089
2022-09-14	14:11:49	0.73416
2022-09-14	14:11:49	0.734313
2022-09-14	14:11:49	0.73243
2022-09-14	14:11:50	0.7307
2022-09-14	14:11:50	0.740318
2022-09-14	14:11:50	0.733957
2022-09-14	14:11:50	0.733651
2022-09-14	14:11:51	0.73299
2022-09-14	14:11:51	0.732481
2022-09-14	14:11:51	0.736349
2022-09-14	14:11:52	0.735026
2022-09-14	14:11:52	0.732277
2022-09-14	14:11:52	0.733601
2022-09-14	14:11:52	0.737061
2022-09-14	14:11:53	0.736349
2022-09-14	14:11:53	0.739046
2022-09-14	14:11:53	0.723372
2022-09-14	14:11:53	0.738282
2022-09-14	14:11:54	0.727952
2022-09-14	14:11:54	0.727646
2022-09-14	14:11:54	0.732328
2022-09-14	14:11:54	0.73472
2022-09-14	14:11:55	0.729224
2022-09-14	14:11:55	0.731819
2022-09-14	14:11:55	0.735738
2022-09-14	14:11:56	0.726934
2022-09-14	14:11:56	0.731412
2022-09-14	14:11:56	0.732277
2022-09-14	14:11:56	0.733193
2022-09-14	14:11:57	0.737621
2022-09-14	14:11:57	0.73528
2022-09-14	14:11:57	0.729886
2022-09-14	14:11:57	0.732125
2022-09-14	14:11:58	0.734517
2022-09-14	14:11:58	0.733499
2022-09-14	14:11:58	0.727901
2022-09-14	14:11:58	0.732481
2022-09-14	14:11:59	0.729631
2022-09-14	14:11:59	0.737672
2022-09-14	14:11:59	0.730394
2022-09-14	14:12:00	0.735738
2022-09-14	14:12:00	0.726425
2022-09-14	14:12:00	0.732837
2022-09-14	14:12:00	0.734924
2022-09-14	14:12:01	0.728613
2022-09-14	14:12:01	0.734466
2022-09-14	14:12:01	0.72958
2022-09-14	14:12:01	0.731819
2022-09-14	14:12:02	0.731616
2022-09-14	14:12:02	0.736298
2022-09-14	14:12:02	0.728919
2022-09-14	14:12:02	0.737773
2022-09-14	14:12:03	0.730191
2022-09-14	14:12:03	0.730751
2022-09-14	14:12:03	0.7307
2022-09-14	14:12:04	0.735992
2022-09-14	14:12:04	0.7393
2022-09-14	14:12:04	0.734313
2022-09-14	14:12:04	0.736857
2022-09-14	14:12:05	0.732634
2022-09-14	14:12:05	0.734211
2022-09-14	14:12:05	0.723422
2022-09-14	14:12:05	0.729224
2022-09-14	14:12:06	0.732684
2022-09-14	14:12:06	0.736552
2022-09-14	14:12:06	0.735738
2022-09-14	14:12:06	0.739046
2022-09-14	14:12:07	0.738486
2022-09-14	14:12:07	0.72383
2022-09-14	14:12:07	0.735891
2022-09-14	14:12:08	0.732226
2022-09-14	14:12:08	0.588511
2022-09-14	14:12:08	0.448053
2022-09-14	14:12:08	0.446985
2022-09-14	14:12:09	0.228359
2022-09-14	14:12:09	0.313295
2022-09-14	14:12:09	0.737926
2022-09-14	14:12:09	0.732481
2022-09-14	14:12:10	0.734262
2022-09-14	14:12:10	0.731463
2022-09-14	14:12:10	0.622913
2022-09-14	14:12:10	0.569479
2022-09-14	14:12:11	0.563931
2022-09-14	14:12:11	0.412786
2022-09-14	14:12:11	0.356807
2022-09-14	14:12:12	0.199708
2022-09-14	14:12:12	0.204644
2022-09-14	14:12:12	0.215585
2022-09-14	14:12:12	0.212939
2022-09-14	14:12:13	0.215178
2022-09-14	14:12:13	0.534771
2022-09-14	14:12:13	0.739046
2022-09-14	14:12:13	0.734517
2022-09-14	14:12:14	0.737672
2022-09-14	14:12:14	0.733702
2022-09-14	14:12:14	0.734313
2022-09-14	14:12:14	0.734059
2022-09-14	14:12:15	0.730496
2022-09-14	14:12:15	0.731717
2022-09-14	14:12:15	0.732786
2022-09-14	14:12:16	0.728359
2022-09-14	14:12:16	0.736298
2022-09-14	14:12:16	0.729377
2022-09-14	14:12:16	0.733702
2022-09-14	14:12:17	0.731412
2022-09-14	14:12:17	0.732837
2022-09-14	14:12:17	0.733295
2022-09-14	14:12:17	0.73014
2022-09-14	14:12:18	0.734262
2022-09-14	14:12:18	0.730598
2022-09-14	14:12:18	0.729784
2022-09-14	14:12:18	0.735789
2022-09-14	14:12:19	0.731209
2022-09-14	14:12:19	0.73528
2022-09-14	14:12:19	0.730343
2022-09-14	14:12:20	0.735178
2022-09-14	14:12:20	0.733957
2022-09-14	14:12:20	0.725865
2022-09-14	14:12:20	0.735534
2022-09-14	14:12:21	0.733702
2022-09-14	14:12:21	0.734517
2022-09-14	14:12:21	0.726374
2022-09-14	14:12:21	0.736349
2022-09-14	14:12:22	0.735076
2022-09-14	14:12:22	0.730242
2022-09-14	14:12:22	0.731819
2022-09-14	14:12:22	0.732226
2022-09-14	14:12:23	0.73472
2022-09-14	14:12:23	0.731565
2022-09-14	14:12:23	0.731921
2022-09-14	14:12:24	0.741387
2022-09-14	14:12:24	0.732532
2022-09-14	14:12:24	0.743219
2022-09-14	14:12:24	0.634466
2022-09-14	14:12:25	0.732074
2022-09-14	14:12:25	0.736959
2022-09-14	14:12:25	0.73131
2022-09-14	14:12:25	0.727494
2022-09-14	14:12:26	0.735076
2022-09-14	14:12:26	0.725916
2022-09-14	14:12:26	0.711616
2022-09-14	14:12:26	0.88785
2022-09-14	14:12:27	-0.170572
2022-09-14	14:12:27	0.74042
2022-09-14	14:12:27	1.1049
2022-09-14	14:12:28	0.289071
2022-09-14	14:12:28	0.0807254
2022-09-14	14:12:28	0.358588
2022-09-14	14:12:28	0.111362
2022-09-14	14:12:29	0.302557
2022-09-14	14:12:29	0.739249
2022-09-14	14:12:29	0.7307
2022-09-14	14:12:29	0.726629
2022-09-14	14:12:30	0.724644
2022-09-14	14:12:30	0.737417
2022-09-14	14:12:30	0.74098
2022-09-14	14:12:30	0.733855
2022-09-14	14:12:31	0.741947
2022-09-14	14:12:31	0.733397
2022-09-14	14:12:31	0.735076
2022-09-14	14:12:32	0.729682
2022-09-14	14:12:32	0.728104
2022-09-14	14:12:32	0.735382
2022-09-14	14:12:32	0.732379
2022-09-14	14:12:33	0.73528
2022-09-14	14:12:33	0.675432
2022-09-14	14:12:33	0.73874
2022-09-14	14:12:33	0.740216
2022-09-14	14:12:34	0.736552
2022-09-14	14:12:34	0.738079
2022-09-14	14:12:34	0.726221
2022-09-14	14:12:34	0.727036
2022-09-14	14:12:35	0.732888
2022-09-14	14:12:35	0.738537
2022-09-14	14:12:35	0.730496
2022-09-14	14:12:36	0.435076
2022-09-14	14:12:36	0.733448
2022-09-14	14:12:36	0.731972
2022-09-14	14:12:36	0.73874
2022-09-14	14:12:37	0.728562
2022-09-14	14:12:37	0.729529
2022-09-14	14:12:37	0.781845
2022-09-14	14:12:37	0.730293
2022-09-14	14:12:38	0.731514
2022-09-14	14:12:38	0.730852
2022-09-14	14:12:38	0.732684
2022-09-14	14:12:38	0.733193
2022-09-14	14:12:39	0.730242
2022-09-14	14:12:39	0.727646
2022-09-14	14:12:39	0.72612
2022-09-14	14:12:40	0.729122
2022-09-14	14:12:40	0.734415
2022-09-14	14:12:40	0.71645
2022-09-14	14:12:40	0.737875
2022-09-14	14:12:41	0.731819
2022-09-14	14:12:41	0.731209
2022-09-14	14:12:41	0.730852
2022-09-14	14:12:41	0.732277
2022-09-14	14:12:42	0.731921
2022-09-14	14:12:42	0.730598
2022-09-14	14:12:42	0.732634
2022-09-14	14:12:42	0.735891
2022-09-14	14:12:43	0.734008
2022-09-14	14:12:43	0.734415
2022-09-14	14:12:43	0.737315
2022-09-14	14:12:44	0.710496
2022-09-14	14:12:44	0.727392
2022-09-14	14:12:44	0.688919
2022-09-14	14:12:44	0.680013
2022-09-14	14:12:45	0.683575
2022-09-14	14:12:45	0.688359
2022-09-14	14:12:45	0.679962
2022-09-14	14:12:45	0.689478
2022-09-14	14:12:46	0.700776
2022-09-14	14:12:46	0.687443
2022-09-14	14:12:46	0.729936
2022-09-14	14:12:46	0.731972
2022-09-14	14:12:47	0.723626
2022-09-14	14:12:47	0.729936
2022-09-14	14:12:47	0.740064
2022-09-14	14:12:48	0.734975
2022-09-14	14:12:48	0.735229
2022-09-14	14:12:48	0.734008
2022-09-14	14:12:48	0.72729
2022-09-14	14:12:49	0.731717
2022-09-14	14:12:49	0.70729
2022-09-14	14:12:49	0.731259
2022-09-14	14:12:49	0.735229
2022-09-14	14:12:50	0.728664
2022-09-14	14:12:50	0.729936
2022-09-14	14:12:50	0.732837
2022-09-14	14:12:50	0.726985
2022-09-14	14:12:51	0.736603
2022-09-14	14:12:51	0.726527
2022-09-14	14:12:51	0.728868
2022-09-14	14:12:52	0.730496
2022-09-14	14:12:52	0.733142
2022-09-14	14:12:52	0.730089
2022-09-14	14:12:52	0.730649
2022-09-14	14:12:53	0.729224
2022-09-14	14:12:53	0.730343
2022-09-14	14:12:53	0.734109
2022-09-14	14:12:53	0.733041
2022-09-14	14:12:54	0.733702
2022-09-14	14:12:54	0.733651
2022-09-14	14:12:54	0.734364
2022-09-14	14:12:54	0.73131
2022-09-14	14:12:55	0.733092
2022-09-14	14:12:55	0.737519
2022-09-14	14:12:55	0.733142
2022-09-14	14:12:56	0.736043
2022-09-14	14:12:56	0.735687
2022-09-14	14:12:56	0.73187
