# Supplementary material for: Comparing efficacy in reducing pulling and welfare impacts of four types of leash walking equipment
Source: PeerJ journal article supplement (doi:10.7717/peerj.18131), 2024-10-24
Supplement: Shelter_2_Tension_files.zip [file Ursula_star_202291412522 copy.xlsx]

## Sheet: Averaged Newtons
Date	Time	Averaged Newtons	Impulse	Total steps
2022-09-14	12:52:18	1.0548	1.0548	0
2022-09-14	12:52:19	0.525284	1.58008	0
2022-09-14	12:52:20	0.606959	2.18704	0		Impulse Newtons	845.08
2022-09-14	12:52:21	0.94114	3.12818	0		Total steps	6
2022-09-14	12:52:22	3.30333	6.43151	0		# > 5 sec	0
2022-09-14	12:52:23	5.50993	11.9414	0
2022-09-14	12:52:24	2.0473	13.9887	0
2022-09-14	12:52:25	2.15138	16.1401	0
2022-09-14	12:52:26	2.07464	18.2148	0
2022-09-14	12:52:27	1.98813	20.2029	0
2022-09-14	12:52:28	1.58041	21.7833	0
2022-09-14	12:52:29	1.70124	23.4845	0
2022-09-14	12:52:30	1.03786	24.5224	0
2022-09-14	12:52:31	2.02872	26.5511	0
2022-09-14	12:52:32	14.3013	40.8524	1
2022-09-14	12:52:33	9.25877	50.1112	1
2022-09-14	12:52:34	19.0866	69.1978	2
2022-09-14	12:52:35	6.67099	75.8688	2
2022-09-14	12:52:36	18.3794	94.2482	3
2022-09-14	12:52:37	2.95369	97.2019	3
2022-09-14	12:52:38	3.213	100.415	3
2022-09-14	12:52:39	3.21536	103.63	3
2022-09-14	12:52:40	36.668	140.298	4
2022-09-14	12:52:41	17.1412	157.44	5
2022-09-14	12:52:42	7.72807	165.168	5
2022-09-14	12:52:43	2.34051	167.508	5
2022-09-14	12:52:44	0.219807	167.728	5
2022-09-14	12:52:45	1.65489	169.383	5
2022-09-14	12:52:46	0.607035	169.99	5
2022-09-14	12:52:47	0.00294404	169.993	5
2022-09-14	12:52:48	-0.983073	169.993	5
2022-09-14	12:52:49	-1.46909	169.993	5
2022-09-14	12:52:50	-1.66008	169.993	5
2022-09-14	12:52:51	-1.89003	169.993	5
2022-09-14	12:52:52	-0.721501	169.993	5
2022-09-14	12:52:53	-0.62167	169.993	5
2022-09-14	12:52:54	-0.929272	169.993	5
2022-09-14	12:52:55	-1.15664	169.993	5
2022-09-14	12:52:56	-1.20254	169.993	5
2022-09-14	12:52:57	-1.93417	169.993	5
2022-09-14	12:52:58	-2.88278	169.993	5
2022-09-14	12:52:59	-1.33089	169.993	5
2022-09-14	12:53:00	2.60842	172.601	5
2022-09-14	12:53:01	3.92043	176.522	5
2022-09-14	12:53:02	2.89626	179.418	5
2022-09-14	12:53:03	1.61069	181.029	5
2022-09-14	12:53:04	1.44385	182.472	5
2022-09-14	12:53:05	1.41797	183.89	5
2022-09-14	12:53:06	1.29479	185.185	5
2022-09-14	12:53:07	1.63367	186.819	5
2022-09-14	12:53:08	3.20491	190.024	5
2022-09-14	12:53:09	3.22419	193.248	5
2022-09-14	12:53:10	3.20746	196.455	5
2022-09-14	12:53:11	3.1151	199.571	5
2022-09-14	12:53:12	1.87034	201.441	5
2022-09-14	12:53:13	3.18963	204.63	5
2022-09-14	12:53:14	3.20446	207.835	5
2022-09-14	12:53:15	3.19919	211.034	5
2022-09-14	12:53:16	3.21651	214.251	5
2022-09-14	12:53:17	3.20208	217.453	5
2022-09-14	12:53:18	3.20497	220.658	5
2022-09-14	12:53:19	3.20938	223.867	5
2022-09-14	12:53:20	3.21431	227.081	5
2022-09-14	12:53:21	3.2151	230.296	5
2022-09-14	12:53:22	3.19829	233.495	5
2022-09-14	12:53:23	3.21617	236.711	5
2022-09-14	12:53:24	3.20269	239.914	5
2022-09-14	12:53:25	3.20627	243.12	5
2022-09-14	12:53:26	3.21481	246.335	5
2022-09-14	12:53:27	3.20927	249.544	5
2022-09-14	12:53:28	3.20208	252.746	5
2022-09-14	12:53:29	3.20021	255.946	5
2022-09-14	12:53:30	3.21074	259.157	5
2022-09-14	12:53:31	3.20621	262.363	5
2022-09-14	12:53:32	3.20834	265.572	5
2022-09-14	12:53:33	3.20938	268.781	5
2022-09-14	12:53:34	3.19693	271.978	5
2022-09-14	12:53:35	3.2014	275.179	5
2022-09-14	12:53:36	3.19772	278.377	5
2022-09-14	12:53:37	3.20804	281.585	5
2022-09-14	12:53:38	3.20543	284.79	5
2022-09-14	12:53:39	3.20842	287.999	5
2022-09-14	12:53:40	3.21182	291.211	5
2022-09-14	12:53:41	3.22709	294.438	5
2022-09-14	12:53:42	3.22427	297.662	5
2022-09-14	12:53:43	3.2002	300.862	5
2022-09-14	12:53:44	3.20853	304.071	5
2022-09-14	12:53:45	3.22862	307.299	5
2022-09-14	12:53:46	3.225	310.524	5
2022-09-14	12:53:47	3.20955	313.734	5
2022-09-14	12:53:48	3.20751	316.942	5
2022-09-14	12:53:49	3.19478	320.136	5
2022-09-14	12:53:50	3.21974	323.356	5
2022-09-14	12:53:51	3.22789	326.584	5
2022-09-14	12:53:52	3.20853	329.792	5
2022-09-14	12:53:53	3.21736	333.01	5
2022-09-14	12:53:54	3.19333	336.203	5
2022-09-14	12:53:55	3.22364	339.427	5
2022-09-14	12:53:56	3.21691	342.644	5
2022-09-14	12:53:57	3.22183	345.866	5
2022-09-14	12:53:58	3.17597	349.041	5
2022-09-14	12:53:59	3.2164	352.258	5
2022-09-14	12:54:00	3.21385	355.472	5
2022-09-14	12:54:01	3.20395	358.676	5
2022-09-14	12:54:02	3.20261	361.878	5
2022-09-14	12:54:03	3.21646	365.095	5
2022-09-14	12:54:04	3.21815	368.313	5
2022-09-14	12:54:05	3.19857	371.511	5
2022-09-14	12:54:06	3.20004	374.712	5
2022-09-14	12:54:07	3.20491	377.916	5
2022-09-14	12:54:08	3.20949	381.126	5
2022-09-14	12:54:09	3.20604	384.332	5
2022-09-14	12:54:10	3.20849	387.54	5
2022-09-14	12:54:11	3.20565	390.746	5
2022-09-14	12:54:12	3.20955	393.956	5
2022-09-14	12:54:13	3.22502	397.181	5
2022-09-14	12:54:14	3.21878	400.399	5
2022-09-14	12:54:15	3.20978	403.609	5
2022-09-14	12:54:16	3.20882	406.818	5
2022-09-14	12:54:17	3.21815	410.036	5
2022-09-14	12:54:18	3.21323	413.249	5
2022-09-14	12:54:19	3.20044	416.45	5
2022-09-14	12:54:20	3.21295	419.663	5
2022-09-14	12:54:21	3.21272	422.876	5
2022-09-14	12:54:22	3.20525	426.081	5
2022-09-14	12:54:23	3.21023	429.291	5
2022-09-14	12:54:24	3.21159	432.503	5
2022-09-14	12:54:25	2.97579	435.478	5
2022-09-14	12:54:26	3.11714	438.596	5
2022-09-14	12:54:27	3.78414	442.38	5
2022-09-14	12:54:28	3.23587	445.616	5
2022-09-14	12:54:29	3.21227	448.828	5
2022-09-14	12:54:30	3.20701	452.035	5
2022-09-14	12:54:31	3.20712	455.242	5
2022-09-14	12:54:32	3.21662	458.459	5
2022-09-14	12:54:33	3.22155	461.68	5
2022-09-14	12:54:34	3.23123	464.911	5
2022-09-14	12:54:35	3.22568	468.137	5
2022-09-14	12:54:36	3.21627	471.353	5
2022-09-14	12:54:37	3.22472	474.578	5
2022-09-14	12:54:38	3.21946	477.797	5
2022-09-14	12:54:39	3.2473	481.045	5
2022-09-14	12:54:40	3.21476	484.26	5
2022-09-14	12:54:41	3.18822	487.448	5
2022-09-14	12:54:42	3.21748	490.665	5
2022-09-14	12:54:43	3.21561	493.881	5
2022-09-14	12:54:44	3.22223	497.103	5
2022-09-14	12:54:45	3.21685	500.32	5
2022-09-14	12:54:46	2.96235	503.282	5
2022-09-14	12:54:47	3.22885	506.511	5
2022-09-14	12:54:48	3.22993	509.741	5
2022-09-14	12:54:49	3.21572	512.957	5
2022-09-14	12:54:50	3.20921	516.166	5
2022-09-14	12:54:51	3.23094	519.397	5
2022-09-14	12:54:52	3.21521	522.612	5
2022-09-14	12:54:53	3.21731	525.829	5
2022-09-14	12:54:54	3.21051	529.04	5
2022-09-14	12:54:55	3.23596	532.276	5
2022-09-14	12:54:56	3.22891	535.505	5
2022-09-14	12:54:57	3.22466	538.729	5
2022-09-14	12:54:58	3.2246	541.954	5
2022-09-14	12:54:59	3.21159	545.166	5
2022-09-14	12:55:00	3.00899	548.175	5
2022-09-14	12:55:01	1.52161	549.696	5
2022-09-14	12:55:02	2.14487	551.841	5
2022-09-14	12:55:03	3.21574	555.057	5
2022-09-14	12:55:04	3.03609	558.093	5
2022-09-14	12:55:05	3.21912	561.312	5
2022-09-14	12:55:06	3.20938	564.521	5
2022-09-14	12:55:07	3.22185	567.743	5
2022-09-14	12:55:08	3.23287	570.976	5
2022-09-14	12:55:09	3.20338	574.18	5
2022-09-14	12:55:10	3.21906	577.399	5
2022-09-14	12:55:11	3.23649	580.635	5
2022-09-14	12:55:12	3.23423	583.869	5
2022-09-14	12:55:13	3.23768	587.107	5
2022-09-14	12:55:14	3.22308	590.33	5
2022-09-14	12:55:15	3.24034	593.57	5
2022-09-14	12:55:16	3.22738	596.798	5
2022-09-14	12:55:17	4.12942	600.927	5
2022-09-14	12:55:18	3.23875	604.166	5
2022-09-14	12:55:19	3.23032	607.396	5
2022-09-14	12:55:20	3.22992	610.626	5
2022-09-14	12:55:21	5.78504	616.411	5
2022-09-14	12:55:22	3.23807	619.649	5
2022-09-14	12:55:23	-0.0276729	619.649	5
2022-09-14	12:55:24	-3.32211	619.649	5
2022-09-14	12:55:25	-4.8834	619.649	5
2022-09-14	12:55:26	-6.4006	619.649	5
2022-09-14	12:55:27	-1.85115	619.649	5
2022-09-14	12:55:28	4.41277	624.062	5
2022-09-14	12:55:29	-0.570116	624.062	5
2022-09-14	12:55:30	-3.1416	624.062	5
2022-09-14	12:55:31	-0.501072	624.062	5
2022-09-14	12:55:32	-1.46807	624.062	5
2022-09-14	12:55:33	-0.513636	624.062	5
2022-09-14	12:55:34	-0.531613	624.062	5
2022-09-14	12:55:35	-5.3093	624.062	5
2022-09-14	12:55:36	-5.98158	624.062	5
2022-09-14	12:55:37	-7.2088	624.062	5
2022-09-14	12:55:38	-9.40379	624.062	5
2022-09-14	12:55:39	-3.81119	624.062	5
2022-09-14	12:55:40	-6.13234	624.062	5
2022-09-14	12:55:41	-6.55844	624.062	5
2022-09-14	12:55:42	-3.24935	624.062	5
2022-09-14	12:55:43	-1.61063	624.062	5
2022-09-14	12:55:44	-3.45363	624.062	5
2022-09-14	12:55:45	-3.46788	624.062	5
2022-09-14	12:55:46	-1.94238	624.062	5
2022-09-14	12:55:47	-0.721954	624.062	5
2022-09-14	12:55:48	-0.599431	624.062	5
2022-09-14	12:55:49	-0.38832	624.062	5
2022-09-14	12:55:50	0.313072	624.375	5
2022-09-14	12:55:51	1.19552	625.571	5
2022-09-14	12:55:52	1.25704	626.828	5
2022-09-14	12:55:53	1.45427	628.282	5
2022-09-14	12:55:54	1.99631	630.278	5
2022-09-14	12:55:55	1.93768	632.216	5
2022-09-14	12:55:56	1.88873	634.105	5
2022-09-14	12:55:57	1.48128	635.586	5
2022-09-14	12:55:58	1.67492	637.261	5
2022-09-14	12:55:59	1.92059	639.182	5
2022-09-14	12:56:00	1.91465	641.096	5
2022-09-14	12:56:01	1.65249	642.749	5
2022-09-14	12:56:02	1.91324	644.662	5
2022-09-14	12:56:03	2.28392	646.946	5
2022-09-14	12:56:04	1.70667	648.653	5
2022-09-14	12:56:05	3.14564	651.798	5
2022-09-14	12:56:06	2.60571	654.404	5
2022-09-14	12:56:07	3.77423	658.178	5
2022-09-14	12:56:08	5.1619	663.34	5
2022-09-14	12:56:09	3.68101	667.021	5
2022-09-14	12:56:10	3.9572	670.978	5
2022-09-14	12:56:11	3.54232	674.521	5
2022-09-14	12:56:12	3.05918	677.58	5
2022-09-14	12:56:13	2.87573	680.455	5
2022-09-14	12:56:14	2.48443	682.94	5
2022-09-14	12:56:15	2.89744	685.837	5
2022-09-14	12:56:16	2.62989	688.467	5
2022-09-14	12:56:17	2.19082	690.658	5
2022-09-14	12:56:18	2.25127	692.909	5
2022-09-14	12:56:19	2.62184	695.531	5
2022-09-14	12:56:20	2.99412	698.525	5
2022-09-14	12:56:21	4.10055	702.626	5
2022-09-14	12:56:22	4.31532	706.941	5
2022-09-14	12:56:23	4.71237	711.653	5
2022-09-14	12:56:24	5.32771	716.981	5
2022-09-14	12:56:25	4.5092	721.49	5
2022-09-14	12:56:26	3.91101	725.401	5
2022-09-14	12:56:27	-5.6591	725.401	5
2022-09-14	12:56:28	-7.16746	725.401	5
2022-09-14	12:56:29	-8.3595	725.401	5
2022-09-14	12:56:30	-9.57884	725.401	5
2022-09-14	12:56:31	-12.3064	725.401	5
2022-09-14	12:56:32	-14.6637	725.401	5
2022-09-14	12:56:33	-15.2785	725.401	5
2022-09-14	12:56:34	-0.243856	725.401	5
2022-09-14	12:56:35	3.22557	728.627	5
2022-09-14	12:56:36	3.21619	731.843	5
2022-09-14	12:56:37	3.14526	734.988	5
2022-09-14	12:56:38	-5.76659	734.988	5
2022-09-14	12:56:39	2.0078	736.996	5
2022-09-14	12:56:40	1.81541	738.812	5
2022-09-14	12:56:41	1.7979	740.61	5
2022-09-14	12:56:42	2.05138	742.661	5
2022-09-14	12:56:43	2.06191	744.723	5
2022-09-14	12:56:44	1.68577	746.409	5
2022-09-14	12:56:45	1.78907	748.198	5
2022-09-14	12:56:46	1.81154	750.009	5
2022-09-14	12:56:47	2.55115	752.56	5
2022-09-14	12:56:48	2.20816	754.768	5
2022-09-14	12:56:49	1.89094	756.659	5
2022-09-14	12:56:50	1.89875	758.558	5
2022-09-14	12:56:51	2.48448	761.043	5
2022-09-14	12:56:52	2.22733	763.27	5
2022-09-14	12:56:53	3.9448	767.215	5
2022-09-14	12:56:54	13.9531	781.168	6
2022-09-14	12:56:55	10.389	791.557	6
2022-09-14	12:56:56	10.7017	802.259	6
2022-09-14	12:56:57	4.43252	806.691	6
2022-09-14	12:56:58	-3.46122	806.691	6
2022-09-14	12:56:59	-1.52523	806.691	6
2022-09-14	12:57:00	-0.0657589	806.691	6
2022-09-14	12:57:01	-1.30367	806.691	6
2022-09-14	12:57:02	3.78657	810.478	6
2022-09-14	12:57:03	-2.38635	810.478	6
2022-09-14	12:57:04	-2.06581	810.478	6
2022-09-14	12:57:05	4.68561	815.163	6
2022-09-14	12:57:06	3.40706	818.57	6
2022-09-14	12:57:07	3.08776	821.658	6
2022-09-14	12:57:08	2.58267	824.241	6
2022-09-14	12:57:09	2.60604	826.847	6
2022-09-14	12:57:10	2.34821	829.195	6
2022-09-14	12:57:11	1.51063	830.706	6
2022-09-14	12:57:12	1.10056	831.806	6
2022-09-14	12:57:13	0.561797	832.368	6
2022-09-14	12:57:14	2.55534	834.923	6
2022-09-14	12:57:15	2.77831	837.702	6
2022-09-14	12:57:16	2.5254	840.227	6
2022-09-14	12:57:17	2.35489	842.582	6
2022-09-14	12:57:18	2.49824	845.08	6
				6

## Sheet: Ursula_star_202291412522 (4)
Date	Time	Lbs	Newtons	Averaged Newtons	Total force x time		Total steps > 13.345	**GoPro Fitting: 1241
2022-09-14	12:52:18	0.312277	1.38907	1.0548	1.38907	FALSE	0
2022-09-14	12:52:18	0.266832	1.18692	1.0548	1.18692	FALSE	0
2022-09-14	12:52:18	0.132277	0.588395	1.0548	1.97747	FALSE	0
2022-09-14	12:52:19	0.143117	0.636613	0.525284	1.82354	FALSE	0
2022-09-14	12:52:19	0.0457636	0.203566	0.525284	2.18103	FALSE	0
2022-09-14	12:52:19	0.20098	0.893999	0.525284	2.71753	FALSE	0
2022-09-14	12:52:19	0.0371122	0.165082	0.525284	2.34611	FALSE	0
2022-09-14	12:52:19	0.163473	0.727161	0.525284	3.44469	FALSE	0
2022-09-14	12:52:20	0.0937025	0.416807	0.606959	2.76292	FALSE	0
2022-09-14	12:52:20	0.216705	0.963947	0.606959	4.40864	FALSE	0
2022-09-14	12:52:20	0.0989442	0.440124	0.606959	3.20304	FALSE	0
2022-09-14	12:52:21	0.350089	1.55727	0.94114	5.96591	FALSE	0
2022-09-14	12:52:21	0.199962	0.889471	0.94114	4.09252	FALSE	0
2022-09-14	12:52:21	-0.0154069	-0.068533	0.94114	5.96591	FALSE	0
2022-09-14	12:52:21	0.311667	1.38636	0.94114	5.47887	FALSE	0
2022-09-14	12:52:22	0.598741	2.66332	3.30333	8.62923	FALSE	0
2022-09-14	12:52:22	0.495127	2.20242	3.30333	7.6813	FALSE	0
2022-09-14	12:52:22	0.959453	4.26784	3.30333	12.8971	FALSE	0
2022-09-14	12:52:22	0.917163	4.07972	3.30333	11.761	FALSE	0
2022-09-14	12:52:23	1.90525	8.47493	5.50993	21.372	FALSE	0
2022-09-14	12:52:23	1.4164	6.30043	5.50993	18.0615	FALSE	0
2022-09-14	12:52:23	0.394415	1.75444	5.50993	23.1264	FALSE	0
2022-09-14	12:52:24	0.477977	2.12614	2.0473	20.1876	FALSE	0
2022-09-14	12:52:24	0.385	1.71256	2.0473	24.839	FALSE	0
2022-09-14	12:52:24	0.510598	2.27124	2.0473	22.4588	FALSE	0
2022-09-14	12:52:24	0.467443	2.07928	2.0473	26.9183	FALSE	0
2022-09-14	12:52:25	0.509122	2.26468	2.15138	24.7235	FALSE	0
2022-09-14	12:52:25	0.529478	2.35522	2.15138	29.2735	FALSE	0
2022-09-14	12:52:25	0.424338	1.88754	2.15138	26.611	FALSE	0
2022-09-14	12:52:25	0.471667	2.09807	2.15138	31.3716	FALSE	0
2022-09-14	12:52:26	0.394364	1.75421	2.07464	28.3653	FALSE	0
2022-09-14	12:52:26	0.525509	2.33757	2.07464	33.7091	FALSE	0
2022-09-14	12:52:26	0.393651	1.75104	2.07464	30.1163	FALSE	0
2022-09-14	12:52:26	0.552074	2.45574	2.07464	36.1649	FALSE	0
2022-09-14	12:52:27	0.468003	2.08177	1.98813	32.1981	FALSE	0
2022-09-14	12:52:27	0.453601	2.01771	1.98813	38.1826	FALSE	0
2022-09-14	12:52:27	0.419249	1.8649	1.98813	34.063	FALSE	0
2022-09-14	12:52:28	0.292481	1.30101	1.58041	39.4836	FALSE	0
2022-09-14	12:52:28	0.419453	1.86581	1.58041	35.9288	FALSE	0
2022-09-14	12:52:28	0.339606	1.51064	1.58041	40.9942	FALSE	0
2022-09-14	12:52:28	0.369631	1.64419	1.58041	37.573	FALSE	0
2022-09-14	12:52:29	0.420827	1.87192	1.70124	42.8662	FALSE	0
2022-09-14	12:52:29	0.379809	1.68947	1.70124	39.2624	FALSE	0
2022-09-14	12:52:29	0.385	1.71256	1.70124	44.5787	FALSE	0
2022-09-14	12:52:29	0.344186	1.53101	1.70124	40.7934	FALSE	0
2022-09-14	12:52:30	0.434008	1.93055	1.03786	46.5093	FALSE	0
2022-09-14	12:52:30	0.433092	1.92648	1.03786	42.7199	FALSE	0
2022-09-14	12:52:30	0.200267	0.890828	1.03786	47.4001	FALSE	0
2022-09-14	12:52:30	-0.134084	-0.596432	1.03786	42.7199	FALSE	0
2022-09-14	12:52:31	0.296298	1.31799	2.02872	48.7181	FALSE	0
2022-09-14	12:52:31	0.358028	1.59258	2.02872	44.3125	FALSE	0
2022-09-14	12:52:31	0.713906	3.1756	2.02872	51.8937	FALSE	0
2022-09-14	12:52:32	1.68434	7.49228	14.3013	51.8048	FALSE	0
2022-09-14	12:52:32	2.49879	11.1151	14.3013	63.0088	FALSE	0
2022-09-14	12:52:32	5.28031	23.4879	14.3013	75.2927	1	1
2022-09-14	12:52:32	3.39686	15.1099	14.3013	78.1187	1	2
2022-09-14	12:52:33	1.60373	7.13371	9.25877	82.4264	FALSE	2
2022-09-14	12:52:33	3.61457	16.0783	9.25877	94.197	1	3
2022-09-14	12:52:33	0.896807	3.98918	9.25877	86.4156	FALSE	3
2022-09-14	12:52:33	2.21075	9.83386	9.25877	104.031	FALSE	3
2022-09-14	12:52:34	3.98291	17.7168	19.0866	104.132	1	4
2022-09-14	12:52:34	3.63731	16.1795	19.0866	120.21	1	5
2022-09-14	12:52:34	5.80927	25.8408	19.0866	129.973	1	6
2022-09-14	12:52:34	3.73396	16.6094	19.0866	136.82	1	7
2022-09-14	12:52:35	1.08378	4.82087	6.67099	134.794	FALSE	7
2022-09-14	12:52:35	0.719758	3.20163	6.67099	140.021	FALSE	7
2022-09-14	12:52:35	2.69558	11.9905	6.67099	146.784	FALSE	7
2022-09-14	12:52:36	4.84719	21.5613	18.3794	161.583	1	8
2022-09-14	12:52:36	4.89762	21.7856	18.3794	168.57	1	9
2022-09-14	12:52:36	3.02627	13.4615	18.3794	175.044	1	10
2022-09-14	12:52:36	3.75645	16.7094	18.3794	185.28	1	11
2022-09-14	12:52:37	0.503422	2.23932	2.95369	177.283	FALSE	11
2022-09-14	12:52:37	0.721437	3.2091	2.95369	188.489	FALSE	11
2022-09-14	12:52:37	0.715534	3.18284	2.95369	180.466	FALSE	11
2022-09-14	12:52:37	0.715687	3.18352	2.95369	191.672	FALSE	11
2022-09-14	12:52:38	0.717824	3.19302	3.213	183.659	FALSE	11
2022-09-14	12:52:38	0.721845	3.21091	3.213	194.883	FALSE	11
2022-09-14	12:52:38	0.731921	3.25573	3.213	186.915	FALSE	11
2022-09-14	12:52:38	0.717672	3.19235	3.213	198.075	FALSE	11
2022-09-14	12:52:39	0.720572	3.20525	3.21536	190.12	FALSE	11
2022-09-14	12:52:39	0.724542	3.22291	3.21536	201.298	FALSE	11
2022-09-14	12:52:39	0.723422	3.21793	3.21536	193.338	FALSE	11
2022-09-14	12:52:40	7.15228	31.8148	36.668	233.113	1	12
2022-09-14	12:52:40	9.18932	40.8759	36.668	234.214	1	13
2022-09-14	12:52:40	9.44627	42.0189	36.668	275.132	1	14
2022-09-14	12:52:40	7.18546	31.9624	36.668	266.177	1	15
2022-09-14	12:52:41	1.83889	8.17975	17.1412	283.312	FALSE	15
2022-09-14	12:52:41	4.84194	21.5379	17.1412	287.714	1	16
2022-09-14	12:52:41	3.61487	16.0797	17.1412	299.391	1	17
2022-09-14	12:52:41	5.11838	22.7676	17.1412	310.482	1	18
2022-09-14	12:52:42	3.57416	15.8986	7.72807	315.29	1	19
2022-09-14	12:52:42	1.11655	4.96664	7.72807	315.449	FALSE	19
2022-09-14	12:52:42	0.521336	2.31901	7.72807	317.609	FALSE	19
2022-09-14	12:52:43	0.50958	2.26671	2.34051	317.715	FALSE	19
2022-09-14	12:52:43	0.416552	1.85291	2.34051	319.462	FALSE	19
2022-09-14	12:52:43	0.456756	2.03174	2.34051	319.747	FALSE	19
2022-09-14	12:52:43	0.721794	3.21068	2.34051	322.673	FALSE	19
2022-09-14	12:52:44	-0.0598852	-0.266381	0.219807	319.747	FALSE	19
2022-09-14	12:52:44	0.1193	0.53067	0.219807	323.203	FALSE	19
2022-09-14	12:52:44	0.067901	0.302037	0.219807	320.049	FALSE	19
2022-09-14	12:52:44	0.0703438	0.312903	0.219807	323.516	FALSE	19
2022-09-14	12:52:45	0.0919213	0.408884	1.65489	320.458	FALSE	19
2022-09-14	12:52:45	0.620013	2.75794	1.65489	326.274	FALSE	19
2022-09-14	12:52:45	0.48556	2.15987	1.65489	322.618	FALSE	19
2022-09-14	12:52:45	0.290649	1.29286	1.65489	327.567	FALSE	19
2022-09-14	12:52:46	0.182812	0.813184	0.607035	323.431	FALSE	19
2022-09-14	12:52:46	0.136298	0.606281	0.607035	328.173	FALSE	19
2022-09-14	12:52:46	0.0902928	0.40164	0.607035	323.833	FALSE	19
2022-09-14	12:52:47	0.120064	0.534069	0.00294404	328.707	FALSE	19
2022-09-14	12:52:47	-0.0536257	-0.238538	0.00294404	323.833	FALSE	19
2022-09-14	12:52:47	0.0309035	0.137465	0.00294404	328.845	FALSE	19
2022-09-14	12:52:47	-0.0946944	-0.42122	0.00294404	323.833	FALSE	19
2022-09-14	12:52:48	0.0338043	0.150368	-0.983073	328.995	FALSE	19
2022-09-14	12:52:48	-0.197035	-0.876451	-0.983073	323.833	FALSE	19
2022-09-14	12:52:48	-0.294643	-1.31063	-0.983073	328.995	FALSE	19
2022-09-14	12:52:48	-0.426145	-1.89558	-0.983073	323.833	FALSE	19
2022-09-14	12:52:49	-0.347977	-1.54787	-1.46909	328.995	FALSE	19
2022-09-14	12:52:49	-0.372557	-1.65721	-1.46909	323.833	FALSE	19
2022-09-14	12:52:49	-0.264771	-1.17775	-1.46909	328.995	FALSE	19
2022-09-14	12:52:49	-0.335763	-1.49354	-1.46909	323.833	FALSE	19
2022-09-14	12:52:50	-0.397595	-1.76858	-1.66008	328.995	FALSE	19
2022-09-14	12:52:50	-0.390267	-1.73599	-1.66008	323.833	FALSE	19
2022-09-14	12:52:50	-0.331743	-1.47566	-1.66008	328.995	FALSE	19
2022-09-14	12:52:51	-0.392404	-1.74549	-1.89003	323.833	FALSE	19
2022-09-14	12:52:51	-0.469554	-2.08867	-1.89003	328.995	FALSE	19
2022-09-14	12:52:51	-0.425076	-1.89082	-1.89003	323.833	FALSE	19
2022-09-14	12:52:51	-0.412557	-1.83514	-1.89003	328.995	FALSE	19
2022-09-14	12:52:52	-0.0772898	-0.3438	-0.721501	323.833	FALSE	19
2022-09-14	12:52:52	-0.293473	-1.30543	-0.721501	328.995	FALSE	19
2022-09-14	12:52:52	-0.138562	-0.616351	-0.721501	323.833	FALSE	19
2022-09-14	12:52:52	-0.139478	-0.620426	-0.721501	328.995	FALSE	19
2022-09-14	12:52:53	-0.088333	-0.392923	-0.62167	323.833	FALSE	19
2022-09-14	12:52:53	-0.190165	-0.845892	-0.62167	328.995	FALSE	19
2022-09-14	12:52:53	-0.104923	-0.466718	-0.62167	323.833	FALSE	19
2022-09-14	12:52:53	-0.17561	-0.781148	-0.62167	328.995	FALSE	19
2022-09-14	12:52:54	-0.123855	-0.550932	-0.929272	323.833	FALSE	19
2022-09-14	12:52:54	-0.286806	-1.27577	-0.929272	328.995	FALSE	19
2022-09-14	12:52:54	-0.216068	-0.961114	-0.929272	323.833	FALSE	19
2022-09-14	12:52:55	-0.283142	-1.25947	-1.15664	328.995	FALSE	19
2022-09-14	12:52:55	-0.230674	-1.02608	-1.15664	323.833	FALSE	19
2022-09-14	12:52:55	-0.338307	-1.50486	-1.15664	328.995	FALSE	19
2022-09-14	12:52:55	-0.187977	-0.836159	-1.15664	323.833	FALSE	19
2022-09-14	12:52:56	-0.177646	-0.790205	-1.20254	328.995	FALSE	19
2022-09-14	12:52:56	-0.224313	-0.997789	-1.20254	323.833	FALSE	19
2022-09-14	12:52:56	-0.368638	-1.63978	-1.20254	328.995	FALSE	19
2022-09-14	12:52:56	-0.310776	-1.38239	-1.20254	323.833	FALSE	19
2022-09-14	12:52:57	-0.449351	-1.9988	-1.93417	328.995	FALSE	19
2022-09-14	12:52:57	-0.452862	-2.01442	-1.93417	323.833	FALSE	19
2022-09-14	12:52:57	-0.466195	-2.07373	-1.93417	328.995	FALSE	19
2022-09-14	12:52:57	-0.370877	-1.64974	-1.93417	323.833	FALSE	19
2022-09-14	12:52:58	-0.665941	-2.96224	-2.88278	328.995	FALSE	19
2022-09-14	12:52:58	-0.6179	-2.74854	-2.88278	323.833	FALSE	19
2022-09-14	12:52:58	-0.660393	-2.93756	-2.88278	328.995	FALSE	19
2022-09-14	12:52:59	-0.417799	-1.85845	-1.33089	323.833	FALSE	19
2022-09-14	12:52:59	-0.478358	-2.12783	-1.33089	328.995	FALSE	19
2022-09-14	12:52:59	-0.310267	-1.38013	-1.33089	323.833	FALSE	19
2022-09-14	12:52:59	0.00963129	0.0428419	-1.33089	329.038	FALSE	19
2022-09-14	12:53:00	0.453397	2.0168	2.60842	325.85	FALSE	19
2022-09-14	12:53:00	0.630394	2.80412	2.60842	331.842	FALSE	19
2022-09-14	12:53:00	0.548155	2.4383	2.60842	328.288	FALSE	19
2022-09-14	12:53:00	0.713651	3.17446	2.60842	335.017	FALSE	19
2022-09-14	12:53:01	0.738486	3.28493	3.92043	331.573	FALSE	19
2022-09-14	12:53:01	1.37482	6.11547	3.92043	341.132	FALSE	19
2022-09-14	12:53:01	0.530751	2.36089	3.92043	333.934	FALSE	19
2022-09-14	12:53:02	0.960522	4.27259	2.89626	345.405	FALSE	19
2022-09-14	12:53:02	0.641896	2.85528	2.89626	336.789	FALSE	19
2022-09-14	12:53:02	0.722049	3.21182	2.89626	348.616	FALSE	19
2022-09-14	12:53:02	0.279962	1.24533	2.89626	338.034	FALSE	19
2022-09-14	12:53:03	0.448461	1.99484	1.61069	350.611	FALSE	19
2022-09-14	12:53:03	0.30444	1.35421	1.61069	339.388	FALSE	19
2022-09-14	12:53:03	0.283473	1.26094	1.61069	351.872	FALSE	19
2022-09-14	12:53:03	0.412023	1.83276	1.61069	341.221	FALSE	19
2022-09-14	12:53:04	0.304389	1.35398	1.44385	353.226	FALSE	19
2022-09-14	12:53:04	0.328206	1.45993	1.44385	342.681	FALSE	19
2022-09-14	12:53:04	0.333957	1.48551	1.44385	354.712	FALSE	19
2022-09-14	12:53:04	0.331819	1.476	1.44385	344.157	FALSE	19
2022-09-14	12:53:05	0.320064	1.42371	1.41797	356.135	FALSE	19
2022-09-14	12:53:05	0.320166	1.42416	1.41797	345.581	FALSE	19
2022-09-14	12:53:05	0.316094	1.40605	1.41797	357.541	FALSE	19
2022-09-14	12:53:06	0.302863	1.3472	1.29479	346.929	FALSE	19
2022-09-14	12:53:06	0.289377	1.28721	1.29479	358.829	FALSE	19
2022-09-14	12:53:06	0.286222	1.27317	1.29479	348.202	FALSE	19
2022-09-14	12:53:06	0.285865	1.27158	1.29479	360.1	FALSE	19
2022-09-14	12:53:07	0.299758	1.33338	1.63367	349.535	FALSE	19
2022-09-14	12:53:07	0.326934	1.45427	1.63367	361.555	FALSE	19
2022-09-14	12:53:07	0.316145	1.40628	1.63367	350.941	FALSE	19
2022-09-14	12:53:07	0.526221	2.34074	1.63367	363.895	FALSE	19
2022-09-14	12:53:08	0.71869	3.19688	3.20491	354.138	FALSE	19
2022-09-14	12:53:08	0.71589	3.18442	3.20491	367.08	FALSE	19
2022-09-14	12:53:08	0.72271	3.21476	3.20491	357.353	FALSE	19
2022-09-14	12:53:08	0.724695	3.22359	3.20491	370.303	FALSE	19
2022-09-14	12:53:09	0.717366	3.19099	3.22419	360.544	FALSE	19
2022-09-14	12:53:09	0.725662	3.22789	3.22419	373.531	FALSE	19
2022-09-14	12:53:09	0.731463	3.25369	3.22419	363.798	FALSE	19
2022-09-14	12:53:10	0.721997	3.21159	3.20746	376.743	FALSE	19
2022-09-14	12:53:10	0.723728	3.21929	3.20746	367.017	FALSE	19
2022-09-14	12:53:10	0.716043	3.1851	3.20746	379.928	FALSE	19
2022-09-14	12:53:10	0.722507	3.21386	3.20746	370.231	FALSE	19
2022-09-14	12:53:11	0.723626	3.21883	3.1151	383.147	FALSE	19
2022-09-14	12:53:11	0.727748	3.23717	3.1151	373.468	FALSE	19
2022-09-14	12:53:11	0.719198	3.19914	3.1151	386.346	FALSE	19
2022-09-14	12:53:11	0.630649	2.80525	3.1151	376.273	FALSE	19
2022-09-14	12:53:12	0.322405	1.43412	1.87034	387.78	FALSE	19
2022-09-14	12:53:12	0.316705	1.40877	1.87034	377.682	FALSE	19
2022-09-14	12:53:12	0.32958	1.46604	1.87034	389.246	FALSE	19
2022-09-14	12:53:12	0.713193	3.17243	1.87034	380.854	FALSE	19
2022-09-14	12:53:13	0.717977	3.19371	3.18963	392.44	FALSE	19
2022-09-14	12:53:13	0.717672	3.19235	3.18963	384.047	FALSE	19
2022-09-14	12:53:13	0.715534	3.18284	3.18963	395.623	FALSE	19
2022-09-14	12:53:14	0.719504	3.2005	3.20446	387.247	FALSE	19
2022-09-14	12:53:14	0.722404	3.2134	3.20446	398.836	FALSE	19
2022-09-14	12:53:14	0.718842	3.19755	3.20446	390.445	FALSE	19
2022-09-14	12:53:14	0.720827	3.20638	3.20446	402.042	FALSE	19
2022-09-14	12:53:15	0.721794	3.21068	3.19919	393.655	FALSE	19
2022-09-14	12:53:15	0.714873	3.1799	3.19919	405.222	FALSE	19
2022-09-14	12:53:15	0.719198	3.19914	3.19919	396.855	FALSE	19
2022-09-14	12:53:15	0.720979	3.20706	3.19919	408.429	FALSE	19
2022-09-14	12:53:16	0.720013	3.20276	3.21651	400.057	FALSE	19
2022-09-14	12:53:16	0.722914	3.21567	3.21651	411.645	FALSE	19
2022-09-14	12:53:16	0.722914	3.21567	3.21651	403.273	FALSE	19
2022-09-14	12:53:16	0.726578	3.23196	3.21651	414.877	FALSE	19
2022-09-14	12:53:17	0.723219	3.21702	3.20208	406.49	FALSE	19
2022-09-14	12:53:17	0.716908	3.18895	3.20208	418.066	FALSE	19
2022-09-14	12:53:17	0.719453	3.20027	3.20208	409.69	FALSE	19
2022-09-14	12:53:18	0.719351	3.19982	3.20497	421.266	FALSE	19
2022-09-14	12:53:18	0.72383	3.21974	3.20497	412.91	FALSE	19
2022-09-14	12:53:18	0.719809	3.20185	3.20497	424.468	FALSE	19
2022-09-14	12:53:18	0.719046	3.19846	3.20497	416.109	FALSE	19
2022-09-14	12:53:19	0.724898	3.22449	3.20938	427.692	FALSE	19
2022-09-14	12:53:19	0.712837	3.17084	3.20938	419.279	FALSE	19
2022-09-14	12:53:19	0.725	3.22494	3.20938	430.917	FALSE	19
2022-09-14	12:53:19	0.72327	3.21725	3.20938	422.497	FALSE	19
2022-09-14	12:53:20	0.719962	3.20253	3.21431	434.119	FALSE	19
2022-09-14	12:53:20	0.723626	3.21883	3.21431	425.715	FALSE	19
2022-09-14	12:53:20	0.724237	3.22155	3.21431	437.341	FALSE	19
2022-09-14	12:53:21	0.72383	3.21974	3.2151	428.935	FALSE	19
2022-09-14	12:53:21	0.720369	3.20435	3.2151	440.545	FALSE	19
2022-09-14	12:53:21	0.724949	3.22472	3.2151	432.16	FALSE	19
2022-09-14	12:53:21	0.721997	3.21159	3.2151	443.757	FALSE	19
2022-09-14	12:53:22	0.718944	3.19801	3.19829	435.358	FALSE	19
2022-09-14	12:53:22	0.716501	3.18714	3.19829	446.944	FALSE	19
2022-09-14	12:53:22	0.719809	3.20185	3.19829	438.56	FALSE	19
2022-09-14	12:53:22	0.720776	3.20616	3.19829	450.15	FALSE	19
2022-09-14	12:53:23	0.722761	3.21499	3.21617	441.775	FALSE	19
2022-09-14	12:53:23	0.725611	3.22766	3.21617	453.378	FALSE	19
2022-09-14	12:53:23	0.720114	3.20321	3.21617	444.978	FALSE	19
2022-09-14	12:53:23	0.723626	3.21883	3.21617	456.597	FALSE	19
2022-09-14	12:53:24	0.719402	3.20004	3.20269	448.178	FALSE	19
2022-09-14	12:53:24	0.716298	3.18624	3.20269	459.783	FALSE	19
2022-09-14	12:53:24	0.724288	3.22178	3.20269	451.4	FALSE	19
2022-09-14	12:53:25	0.717977	3.19371	3.20627	462.977	FALSE	19
2022-09-14	12:53:25	0.719504	3.2005	3.20627	454.6	FALSE	19
2022-09-14	12:53:25	0.72042	3.20457	3.20627	466.181	FALSE	19
2022-09-14	12:53:25	0.725305	3.2263	3.20627	457.827	FALSE	19
2022-09-14	12:53:26	0.722303	3.21295	3.21481	469.394	FALSE	19
2022-09-14	12:53:26	0.722303	3.21295	3.21481	461.04	FALSE	19
2022-09-14	12:53:26	0.724847	3.22426	3.21481	472.618	FALSE	19
2022-09-14	12:53:26	0.721437	3.2091	3.21481	464.249	FALSE	19
2022-09-14	12:53:27	0.719351	3.19982	3.20927	475.818	FALSE	19
2022-09-14	12:53:27	0.72897	3.2426	3.20927	467.491	FALSE	19
2022-09-14	12:53:27	0.718791	3.19733	3.20927	479.016	FALSE	19
2022-09-14	12:53:27	0.718791	3.19733	3.20927	470.689	FALSE	19
2022-09-14	12:53:28	0.723066	3.21634	3.20208	482.232	FALSE	19
2022-09-14	12:53:28	0.71986	3.20208	3.20208	473.891	FALSE	19
2022-09-14	12:53:28	0.716654	3.18782	3.20208	485.42	FALSE	19
2022-09-14	12:53:29	0.714109	3.1765	3.20021	477.067	FALSE	19
2022-09-14	12:53:29	0.719707	3.2014	3.20021	488.621	FALSE	19
2022-09-14	12:53:29	0.721591	3.20978	3.20021	480.277	FALSE	19
2022-09-14	12:53:29	0.722354	3.21318	3.20021	491.834	FALSE	19
2022-09-14	12:53:30	0.720064	3.20299	3.21074	483.48	FALSE	19
2022-09-14	12:53:30	0.727036	3.234	3.21074	495.068	FALSE	19
2022-09-14	12:53:30	0.721081	3.20751	3.21074	486.687	FALSE	19
2022-09-14	12:53:30	0.719046	3.19846	3.21074	498.267	FALSE	19
2022-09-14	12:53:31	0.721285	3.20842	3.20621	489.896	FALSE	19
2022-09-14	12:53:31	0.717926	3.19348	3.20621	501.46	FALSE	19
2022-09-14	12:53:31	0.720979	3.20706	3.20621	493.103	FALSE	19
2022-09-14	12:53:31	0.722965	3.21589	3.20621	504.676	FALSE	19
2022-09-14	12:53:32	0.720064	3.20299	3.20834	496.306	FALSE	19
2022-09-14	12:53:32	0.72271	3.21476	3.20834	507.891	FALSE	19
2022-09-14	12:53:32	0.72103	3.20729	3.20834	499.513	FALSE	19
2022-09-14	12:53:33	0.723779	3.21951	3.20938	511.11	FALSE	19
2022-09-14	12:53:33	0.717112	3.18986	3.20938	502.703	FALSE	19
2022-09-14	12:53:33	0.723982	3.22042	3.20938	514.331	FALSE	19
2022-09-14	12:53:33	0.721132	3.20774	3.20938	505.911	FALSE	19
2022-09-14	12:53:34	0.719707	3.2014	3.19693	517.532	FALSE	19
2022-09-14	12:53:34	0.717468	3.19144	3.19693	509.102	FALSE	19
2022-09-14	12:53:34	0.716196	3.18578	3.19693	520.718	FALSE	19
2022-09-14	12:53:34	0.721437	3.2091	3.19693	512.311	FALSE	19
2022-09-14	12:53:35	0.713855	3.17537	3.2014	523.893	FALSE	19
2022-09-14	12:53:35	0.718435	3.19574	3.2014	515.507	FALSE	19
2022-09-14	12:53:35	0.726832	3.23309	3.2014	527.127	FALSE	19
2022-09-14	12:53:36	0.719555	3.20072	3.19772	518.708	FALSE	19
2022-09-14	12:53:36	0.715789	3.18397	3.19772	530.311	FALSE	19
2022-09-14	12:53:36	0.71757	3.19189	3.19772	521.9	FALSE	19
2022-09-14	12:53:36	0.722608	3.2143	3.19772	533.525	FALSE	19
2022-09-14	12:53:37	0.720064	3.20299	3.20804	525.103	FALSE	19
2022-09-14	12:53:37	0.71813	3.19439	3.20804	536.719	FALSE	19
2022-09-14	12:53:37	0.725407	3.22676	3.20804	528.329	FALSE	19
2022-09-14	12:53:38	0.719809	3.20185	3.20543	539.921	FALSE	19
2022-09-14	12:53:38	0.720776	3.20616	3.20543	531.536	FALSE	19
2022-09-14	12:53:38	0.715331	3.18194	3.20543	543.103	FALSE	19
2022-09-14	12:53:38	0.724949	3.22472	3.20543	534.76	FALSE	19
2022-09-14	12:53:38	0.722201	3.21249	3.20543	546.315	FALSE	19
2022-09-14	12:53:39	0.718232	3.19484	3.20842	537.955	FALSE	19
2022-09-14	12:53:39	0.720064	3.20299	3.20842	549.518	FALSE	19
2022-09-14	12:53:39	0.72556	3.22744	3.20842	541.183	FALSE	19
2022-09-14	12:53:40	0.723473	3.21815	3.21182	552.737	FALSE	19
2022-09-14	12:53:40	0.720674	3.2057	3.21182	544.388	FALSE	19
2022-09-14	12:53:40	0.717112	3.18986	3.21182	555.926	FALSE	19
2022-09-14	12:53:40	0.726934	3.23355	3.21182	547.622	FALSE	19
2022-09-14	12:53:41	0.732684	3.25912	3.22709	559.186	FALSE	19
2022-09-14	12:53:41	0.729478	3.24486	3.22709	550.867	FALSE	19
2022-09-14	12:53:41	0.717417	3.19121	3.22709	562.377	FALSE	19
2022-09-14	12:53:41	0.722354	3.21318	3.22709	554.08	FALSE	19
2022-09-14	12:53:42	0.719249	3.19936	3.22427	565.576	FALSE	19
2022-09-14	12:53:42	0.72902	3.24283	3.22427	557.323	FALSE	19
2022-09-14	12:53:42	0.722914	3.21567	3.22427	568.792	FALSE	19
2022-09-14	12:53:42	0.728206	3.23921	3.22427	560.562	FALSE	19
2022-09-14	12:53:43	0.718079	3.19416	3.2002	571.986	FALSE	19
2022-09-14	12:53:43	0.722761	3.21499	3.2002	563.777	FALSE	19
2022-09-14	12:53:43	0.717468	3.19144	3.2002	575.177	FALSE	19
2022-09-14	12:53:44	0.721387	3.20887	3.20853	566.986	FALSE	19
2022-09-14	12:53:44	0.722608	3.2143	3.20853	578.392	FALSE	19
2022-09-14	12:53:44	0.71701	3.1894	3.20853	570.175	FALSE	19
2022-09-14	12:53:44	0.724237	3.22155	3.20853	581.613	FALSE	19
2022-09-14	12:53:45	0.72612	3.22993	3.22862	573.405	FALSE	19
2022-09-14	12:53:45	0.726578	3.23196	3.22862	584.845	FALSE	19
2022-09-14	12:53:45	0.721285	3.20842	3.22862	576.614	FALSE	19
2022-09-14	12:53:45	0.729326	3.24419	3.22862	588.089	FALSE	19
2022-09-14	12:53:46	0.730089	3.24758	3.225	579.861	FALSE	19
2022-09-14	12:53:46	0.720369	3.20435	3.225	591.294	FALSE	19
2022-09-14	12:53:46	0.72617	3.23015	3.225	583.091	FALSE	19
2022-09-14	12:53:46	0.723422	3.21793	3.225	594.512	FALSE	19
2022-09-14	12:53:47	0.723728	3.21929	3.20955	586.311	FALSE	19
2022-09-14	12:53:47	0.720979	3.20706	3.20955	597.719	FALSE	19
2022-09-14	12:53:47	0.719911	3.20231	3.20955	589.513	FALSE	19
2022-09-14	12:53:48	0.727392	3.23559	3.20751	600.954	FALSE	19
2022-09-14	12:53:48	0.715025	3.18057	3.20751	592.693	FALSE	19
2022-09-14	12:53:48	0.721285	3.20842	3.20751	604.163	FALSE	19
2022-09-14	12:53:48	0.720623	3.20548	3.20751	595.899	FALSE	19
2022-09-14	12:53:49	0.718181	3.19461	3.19478	607.357	FALSE	19
2022-09-14	12:53:49	0.720725	3.20593	3.19478	599.105	FALSE	19
2022-09-14	12:53:49	0.715178	3.18125	3.19478	610.539	FALSE	19
2022-09-14	12:53:49	0.718791	3.19733	3.19478	602.302	FALSE	19
2022-09-14	12:53:50	0.726781	3.23287	3.21974	613.772	FALSE	19
2022-09-14	12:53:50	0.723473	3.21815	3.21974	605.52	FALSE	19
2022-09-14	12:53:50	0.720979	3.20706	3.21974	616.979	FALSE	19
2022-09-14	12:53:50	0.724084	3.22087	3.21974	608.741	FALSE	19
2022-09-14	12:53:51	0.724847	3.22426	3.22789	620.203	FALSE	19
2022-09-14	12:53:51	0.726934	3.23355	3.22789	611.975	FALSE	19
2022-09-14	12:53:51	0.725204	3.22585	3.22789	623.429	FALSE	19
2022-09-14	12:53:52	0.724237	3.22155	3.20853	615.196	FALSE	19
2022-09-14	12:53:52	0.718639	3.19665	3.20853	626.625	FALSE	19
2022-09-14	12:53:52	0.720572	3.20525	3.20853	618.402	FALSE	19
2022-09-14	12:53:52	0.721794	3.21068	3.20853	629.836	FALSE	19
2022-09-14	12:53:53	0.724135	3.2211	3.21736	621.623	FALSE	19
2022-09-14	12:53:53	0.725611	3.22766	3.21736	633.064	FALSE	19
2022-09-14	12:53:53	0.720318	3.20412	3.21736	624.827	FALSE	19
2022-09-14	12:53:53	0.723117	3.21657	3.21736	636.28	FALSE	19
2022-09-14	12:53:54	0.721997	3.21159	3.19333	628.038	FALSE	19
2022-09-14	12:53:54	0.714008	3.17605	3.19333	639.456	FALSE	19
2022-09-14	12:53:54	0.717672	3.19235	3.19333	631.231	FALSE	19
2022-09-14	12:53:55	0.732735	3.25935	3.22364	642.716	FALSE	19
2022-09-14	12:53:55	0.722201	3.21249	3.22364	634.443	FALSE	19
2022-09-14	12:53:55	0.721895	3.21113	3.22364	645.927	FALSE	19
2022-09-14	12:53:55	0.721997	3.21159	3.22364	637.655	FALSE	19
2022-09-14	12:53:56	0.723168	3.2168	3.21691	649.144	FALSE	19
2022-09-14	12:53:56	0.715992	3.18488	3.21691	640.84	FALSE	19
2022-09-14	12:53:56	0.721183	3.20797	3.21691	652.352	FALSE	19
2022-09-14	12:53:56	0.73243	3.258	3.21691	644.098	FALSE	19
2022-09-14	12:53:57	0.721845	3.21091	3.22183	655.562	FALSE	19
2022-09-14	12:53:57	0.719097	3.19869	3.22183	647.296	FALSE	19
2022-09-14	12:53:57	0.727494	3.23604	3.22183	658.799	FALSE	19
2022-09-14	12:53:57	0.728766	3.2417	3.22183	650.538	FALSE	19
2022-09-14	12:53:58	0.719911	3.20231	3.17597	662.001	FALSE	19
2022-09-14	12:53:58	0.70902	3.15386	3.17597	653.692	FALSE	19
2022-09-14	12:53:58	0.713041	3.17175	3.17597	665.173	FALSE	19
2022-09-14	12:53:59	0.725662	3.22789	3.2164	656.92	FALSE	19
2022-09-14	12:53:59	0.719351	3.19982	3.2164	668.372	FALSE	19
2022-09-14	12:53:59	0.723015	3.21612	3.2164	660.136	FALSE	19
2022-09-14	12:53:59	0.724288	3.22178	3.2164	671.594	FALSE	19
2022-09-14	12:54:00	0.725051	3.22517	3.21385	663.361	FALSE	19
2022-09-14	12:54:00	0.721336	3.20865	3.21385	674.803	FALSE	19
2022-09-14	12:54:00	0.722099	3.21204	3.21385	666.573	FALSE	19
2022-09-14	12:54:00	0.721539	3.20955	3.21385	678.012	FALSE	19
2022-09-14	12:54:01	0.720216	3.20366	3.20395	669.777	FALSE	19
2022-09-14	12:54:01	0.724084	3.22087	3.20395	681.233	FALSE	19
2022-09-14	12:54:01	0.716857	3.18872	3.20395	672.965	FALSE	19
2022-09-14	12:54:01	0.719962	3.20253	3.20395	684.436	FALSE	19
2022-09-14	12:54:02	0.72327	3.21725	3.20261	676.183	FALSE	19
2022-09-14	12:54:02	0.719707	3.2014	3.20261	687.637	FALSE	19
2022-09-14	12:54:02	0.716959	3.18918	3.20261	679.372	FALSE	19
2022-09-14	12:54:03	0.720878	3.20661	3.21646	690.844	FALSE	19
2022-09-14	12:54:03	0.721488	3.20932	3.21646	682.581	FALSE	19
2022-09-14	12:54:03	0.724796	3.22404	3.21646	694.068	FALSE	19
2022-09-14	12:54:03	0.725204	3.22585	3.21646	685.807	FALSE	19
2022-09-14	12:54:04	0.718893	3.19778	3.21815	697.266	FALSE	19
2022-09-14	12:54:04	0.725865	3.22879	3.21815	689.036	FALSE	19
2022-09-14	12:54:04	0.724389	3.22223	3.21815	700.488	FALSE	19
2022-09-14	12:54:04	0.724746	3.22382	3.21815	692.26	FALSE	19
2022-09-14	12:54:05	0.7193	3.19959	3.19857	703.687	FALSE	19
2022-09-14	12:54:05	0.720013	3.20276	3.19857	695.462	FALSE	19
2022-09-14	12:54:05	0.722049	3.21182	3.19857	706.899	FALSE	19
2022-09-14	12:54:05	0.714924	3.18012	3.19857	698.643	FALSE	19
2022-09-14	12:54:06	0.720572	3.20525	3.20004	710.104	FALSE	19
2022-09-14	12:54:06	0.724796	3.22404	3.20004	701.867	FALSE	19
2022-09-14	12:54:06	0.712837	3.17084	3.20004	713.275	FALSE	19
2022-09-14	12:54:07	0.723066	3.21634	3.20491	705.083	FALSE	19
2022-09-14	12:54:07	0.718028	3.19393	3.20491	716.469	FALSE	19
2022-09-14	12:54:07	0.716908	3.18895	3.20491	708.272	FALSE	19
2022-09-14	12:54:07	0.723982	3.22042	3.20491	719.69	FALSE	19
2022-09-14	12:54:08	0.722354	3.21318	3.20949	711.485	FALSE	19
2022-09-14	12:54:08	0.721183	3.20797	3.20949	722.898	FALSE	19
2022-09-14	12:54:08	0.720572	3.20525	3.20949	714.69	FALSE	19
2022-09-14	12:54:08	0.721997	3.21159	3.20949	726.109	FALSE	19
2022-09-14	12:54:09	0.725153	3.22563	3.20604	717.916	FALSE	19
2022-09-14	12:54:09	0.721845	3.21091	3.20604	729.32	FALSE	19
2022-09-14	12:54:09	0.724288	3.22178	3.20604	721.138	FALSE	19
2022-09-14	12:54:09	0.711718	3.16586	3.20604	732.486	FALSE	19
2022-09-14	12:54:10	0.727188	3.23468	3.20849	724.372	FALSE	19
2022-09-14	12:54:10	0.714109	3.1765	3.20849	735.663	FALSE	19
2022-09-14	12:54:10	0.722608	3.2143	3.20849	727.587	FALSE	19
2022-09-14	12:54:11	0.715382	3.18216	3.20565	738.845	FALSE	19
2022-09-14	12:54:11	0.725	3.22494	3.20565	730.812	FALSE	19
2022-09-14	12:54:11	0.721946	3.21136	3.20565	742.056	FALSE	19
2022-09-14	12:54:11	0.720318	3.20412	3.20565	734.016	FALSE	19
2022-09-14	12:54:12	0.722049	3.21182	3.20955	745.268	FALSE	19
2022-09-14	12:54:12	0.721692	3.21023	3.20955	737.226	FALSE	19
2022-09-14	12:54:12	0.720267	3.20389	3.20955	748.472	FALSE	19
2022-09-14	12:54:12	0.72215	3.21227	3.20955	740.438	FALSE	19
2022-09-14	12:54:13	0.727748	3.23717	3.22502	751.709	FALSE	19
2022-09-14	12:54:13	0.724186	3.22132	3.22502	743.66	FALSE	19
2022-09-14	12:54:13	0.723117	3.21657	3.22502	754.925	FALSE	19
2022-09-14	12:54:14	0.720929	3.20684	3.21878	746.866	FALSE	19
2022-09-14	12:54:14	0.722354	3.21318	3.21878	758.139	FALSE	19
2022-09-14	12:54:14	0.727646	3.23671	3.21878	750.103	FALSE	19
2022-09-14	12:54:14	0.723524	3.21838	3.21878	761.357	FALSE	19
2022-09-14	12:54:15	0.718028	3.19393	3.20978	753.297	FALSE	19
2022-09-14	12:54:15	0.724491	3.22268	3.20978	764.58	FALSE	19
2022-09-14	12:54:15	0.719046	3.19846	3.20978	756.496	FALSE	19
2022-09-14	12:54:15	0.724796	3.22404	3.20978	767.804	FALSE	19
2022-09-14	12:54:16	0.72103	3.20729	3.20882	759.703	FALSE	19
2022-09-14	12:54:16	0.723321	3.21748	3.20882	771.021	FALSE	19
2022-09-14	12:54:16	0.720725	3.20593	3.20882	762.909	FALSE	19
2022-09-14	12:54:16	0.72042	3.20457	3.20882	774.226	FALSE	19
2022-09-14	12:54:17	0.725814	3.22857	3.21815	766.137	FALSE	19
2022-09-14	12:54:17	0.725458	3.22698	3.21815	777.453	FALSE	19
2022-09-14	12:54:17	0.719148	3.19891	3.21815	769.336	FALSE	19
2022-09-14	12:54:18	0.722761	3.21499	3.21323	780.668	FALSE	19
2022-09-14	12:54:18	0.722862	3.21543	3.21323	772.552	FALSE	19
2022-09-14	12:54:18	0.719707	3.2014	3.21323	783.869	FALSE	19
2022-09-14	12:54:18	0.724135	3.2211	3.21323	775.773	FALSE	19
2022-09-14	12:54:19	0.718588	3.19642	3.20044	787.066	FALSE	19
2022-09-14	12:54:19	0.719962	3.20253	3.20044	778.975	FALSE	19
2022-09-14	12:54:19	0.716399	3.18669	3.20044	790.252	FALSE	19
2022-09-14	12:54:19	0.723015	3.21612	3.20044	782.191	FALSE	19
2022-09-14	12:54:20	0.719148	3.19891	3.21295	793.451	FALSE	19
2022-09-14	12:54:20	0.722557	3.21408	3.21295	785.406	FALSE	19
2022-09-14	12:54:20	0.723372	3.2177	3.21295	796.669	FALSE	19
2022-09-14	12:54:20	0.724135	3.2211	3.21295	788.627	FALSE	19
2022-09-14	12:54:21	0.723626	3.21883	3.21272	799.888	FALSE	19
2022-09-14	12:54:21	0.727443	3.23581	3.21272	791.862	FALSE	19
2022-09-14	12:54:21	0.715687	3.18352	3.21272	803.071	FALSE	19
2022-09-14	12:54:22	0.721946	3.21136	3.20525	795.074	FALSE	19
2022-09-14	12:54:22	0.723015	3.21612	3.20525	806.287	FALSE	19
2022-09-14	12:54:22	0.714924	3.18012	3.20525	798.254	FALSE	19
2022-09-14	12:54:22	0.722404	3.2134	3.20525	809.501	FALSE	19
2022-09-14	12:54:23	0.723066	3.21634	3.21023	801.47	FALSE	19
2022-09-14	12:54:23	0.720929	3.20684	3.21023	812.708	FALSE	19
2022-09-14	12:54:23	0.721845	3.21091	3.21023	804.681	FALSE	19
2022-09-14	12:54:23	0.720929	3.20684	3.21023	815.914	FALSE	19
2022-09-14	12:54:24	0.718842	3.19755	3.21159	807.879	FALSE	19
2022-09-14	12:54:24	0.722049	3.21182	3.21159	819.126	FALSE	19
2022-09-14	12:54:24	0.727341	3.23536	3.21159	811.114	FALSE	19
2022-09-14	12:54:24	0.719758	3.20163	3.21159	822.328	FALSE	19
2022-09-14	12:54:25	0.725662	3.22789	2.97579	814.342	FALSE	19
2022-09-14	12:54:25	0.719453	3.20027	2.97579	825.528	FALSE	19
2022-09-14	12:54:25	0.561845	2.4992	2.97579	816.841	FALSE	19
2022-09-14	12:54:26	0.632328	2.81272	3.11714	828.341	FALSE	19
2022-09-14	12:54:26	0.718639	3.19665	3.11714	820.038	FALSE	19
2022-09-14	12:54:26	0.726883	3.23332	3.11714	831.574	FALSE	19
2022-09-14	12:54:26	0.725204	3.22585	3.11714	823.264	FALSE	19
2022-09-14	12:54:27	0.836145	3.71934	3.78414	835.294	FALSE	19
2022-09-14	12:54:27	1.12902	5.02211	3.78414	828.286	FALSE	19
2022-09-14	12:54:27	0.7193	3.19959	3.78414	838.493	FALSE	19
2022-09-14	12:54:27	0.718384	3.19552	3.78414	831.481	FALSE	19
2022-09-14	12:54:28	0.73187	3.2555	3.23587	841.749	FALSE	19
2022-09-14	12:54:28	0.727596	3.23649	3.23587	834.718	FALSE	19
2022-09-14	12:54:28	0.723779	3.21951	3.23587	844.968	FALSE	19
2022-09-14	12:54:28	0.726578	3.23196	3.23587	837.95	FALSE	19
2022-09-14	12:54:29	0.724338	3.222	3.21227	848.19	FALSE	19
2022-09-14	12:54:29	0.719351	3.19982	3.21227	841.15	FALSE	19
2022-09-14	12:54:29	0.722761	3.21499	3.21227	851.405	FALSE	19
2022-09-14	12:54:30	0.716247	3.18601	3.20701	844.336	FALSE	19
2022-09-14	12:54:30	0.725254	3.22607	3.20701	854.631	FALSE	19
2022-09-14	12:54:30	0.718232	3.19484	3.20701	847.53	FALSE	19
2022-09-14	12:54:30	0.724135	3.2211	3.20701	857.852	FALSE	19
2022-09-14	12:54:31	0.72388	3.21996	3.20712	850.75	FALSE	19
2022-09-14	12:54:31	0.720216	3.20366	3.20712	861.056	FALSE	19
2022-09-14	12:54:31	0.716908	3.18895	3.20712	853.939	FALSE	19
2022-09-14	12:54:31	0.722965	3.21589	3.20712	864.272	FALSE	19
2022-09-14	12:54:32	0.721997	3.21159	3.21662	857.151	FALSE	19
2022-09-14	12:54:32	0.724389	3.22223	3.21662	867.494	FALSE	19
2022-09-14	12:54:32	0.727646	3.23671	3.21662	860.388	FALSE	19
2022-09-14	12:54:32	0.718486	3.19597	3.21662	870.69	FALSE	19
2022-09-14	12:54:33	0.721997	3.21159	3.22155	863.599	FALSE	19
2022-09-14	12:54:33	0.726221	3.23038	3.22155	873.92	FALSE	19
2022-09-14	12:54:33	0.724491	3.22268	3.22155	866.822	FALSE	19
2022-09-14	12:54:34	0.721845	3.21091	3.23123	877.131	FALSE	19
2022-09-14	12:54:34	0.722354	3.21318	3.23123	870.035	FALSE	19
2022-09-14	12:54:34	0.732532	3.25845	3.23123	880.39	FALSE	19
2022-09-14	12:54:34	0.728919	3.24238	3.23123	873.277	FALSE	19
2022-09-14	12:54:35	0.729936	3.2469	3.22568	883.637	FALSE	19
2022-09-14	12:54:35	0.724644	3.22336	3.22568	876.501	FALSE	19
2022-09-14	12:54:35	0.72327	3.21725	3.22568	886.854	FALSE	19
2022-09-14	12:54:35	0.722812	3.21521	3.22568	879.716	FALSE	19
2022-09-14	12:54:36	0.723626	3.21883	3.21627	890.073	FALSE	19
2022-09-14	12:54:36	0.725611	3.22766	3.21627	882.944	FALSE	19
2022-09-14	12:54:36	0.719911	3.20231	3.21627	893.275	FALSE	19
2022-09-14	12:54:37	0.716043	3.1851	3.22472	886.129	FALSE	19
2022-09-14	12:54:37	0.72612	3.22993	3.22472	896.505	FALSE	19
2022-09-14	12:54:37	0.730751	3.25053	3.22472	889.379	FALSE	19
2022-09-14	12:54:37	0.726883	3.23332	3.22472	899.738	FALSE	19
2022-09-14	12:54:38	0.717316	3.19077	3.21946	892.57	FALSE	19
2022-09-14	12:54:38	0.730445	3.24917	3.21946	902.987	FALSE	19
2022-09-14	12:54:38	0.728308	3.23966	3.21946	895.81	FALSE	19
2022-09-14	12:54:38	0.718995	3.19823	3.21946	906.186	FALSE	19
2022-09-14	12:54:39	0.733092	3.26094	3.2473	899.071	FALSE	19
2022-09-14	12:54:39	0.730496	3.24939	3.2473	909.435	FALSE	19
2022-09-14	12:54:39	0.728817	3.24192	3.2473	902.313	FALSE	19
2022-09-14	12:54:39	0.727697	3.23694	3.2473	912.672	FALSE	19
2022-09-14	12:54:40	0.721336	3.20865	3.21476	905.521	FALSE	19
2022-09-14	12:54:40	0.724898	3.22449	3.21476	915.897	FALSE	19
2022-09-14	12:54:40	0.721895	3.21113	3.21476	908.732	FALSE	19
2022-09-14	12:54:41	0.71243	3.16903	3.18822	919.066	FALSE	19
2022-09-14	12:54:41	0.719148	3.19891	3.18822	911.931	FALSE	19
2022-09-14	12:54:41	0.719198	3.19914	3.18822	922.265	FALSE	19
2022-09-14	12:54:41	0.716196	3.18578	3.18822	915.117	FALSE	19
2022-09-14	12:54:42	0.723372	3.2177	3.21748	925.482	FALSE	19
2022-09-14	12:54:42	0.730089	3.24758	3.21748	918.365	FALSE	19
2022-09-14	12:54:42	0.715789	3.18397	3.21748	928.666	FALSE	19
2022-09-14	12:54:42	0.724033	3.22064	3.21748	921.585	FALSE	19
2022-09-14	12:54:43	0.71472	3.17922	3.21561	931.846	FALSE	19
2022-09-14	12:54:43	0.723066	3.21634	3.21561	924.802	FALSE	19
2022-09-14	12:54:43	0.726985	3.23377	3.21561	935.079	FALSE	19
2022-09-14	12:54:43	0.726832	3.23309	3.21561	928.035	FALSE	19
2022-09-14	12:54:44	0.72556	3.22744	3.22223	938.307	FALSE	19
2022-09-14	12:54:44	0.718079	3.19416	3.22223	931.229	FALSE	19
2022-09-14	12:54:44	0.729529	3.24509	3.22223	941.552	FALSE	19
2022-09-14	12:54:45	0.720827	3.20638	3.21685	934.435	FALSE	19
2022-09-14	12:54:45	0.721692	3.21023	3.21685	944.762	FALSE	19
2022-09-14	12:54:45	0.726578	3.23196	3.21685	937.667	FALSE	19
2022-09-14	12:54:45	0.723626	3.21883	3.21685	947.981	FALSE	19
2022-09-14	12:54:46	0.720623	3.20548	2.96235	940.873	FALSE	19
2022-09-14	12:54:46	0.484186	2.15376	2.96235	950.135	FALSE	19
2022-09-14	12:54:46	0.731667	3.2546	2.96235	944.127	FALSE	19
2022-09-14	12:54:46	0.727392	3.23559	2.96235	953.37	FALSE	19
2022-09-14	12:54:47	0.720827	3.20638	3.22885	947.334	FALSE	19
2022-09-14	12:54:47	0.728664	3.24124	3.22885	956.612	FALSE	19
2022-09-14	12:54:47	0.725051	3.22517	3.22885	950.559	FALSE	19
2022-09-14	12:54:47	0.72897	3.2426	3.22885	959.854	FALSE	19
2022-09-14	12:54:48	0.727494	3.23604	3.22993	953.795	FALSE	19
2022-09-14	12:54:48	0.724237	3.22155	3.22993	963.076	FALSE	19
2022-09-14	12:54:48	0.726629	3.23219	3.22993	957.027	FALSE	19
2022-09-14	12:54:49	0.727392	3.23559	3.21572	966.311	FALSE	19
2022-09-14	12:54:49	0.717366	3.19099	3.21572	960.218	FALSE	19
2022-09-14	12:54:49	0.723066	3.21634	3.21572	969.528	FALSE	19
2022-09-14	12:54:49	0.72388	3.21996	3.21572	963.438	FALSE	19
2022-09-14	12:54:50	0.717468	3.19144	3.20921	972.719	FALSE	19
2022-09-14	12:54:50	0.726578	3.23196	3.20921	966.67	FALSE	19
2022-09-14	12:54:50	0.719402	3.20004	3.20921	975.919	FALSE	19
2022-09-14	12:54:50	0.722404	3.2134	3.20921	969.883	FALSE	19
2022-09-14	12:54:51	0.728461	3.24034	3.23094	979.159	FALSE	19
2022-09-14	12:54:51	0.731616	3.25437	3.23094	973.138	FALSE	19
2022-09-14	12:54:51	0.723575	3.21861	3.23094	982.378	FALSE	19
2022-09-14	12:54:51	0.721743	3.21046	3.23094	976.348	FALSE	19
2022-09-14	12:54:52	0.727545	3.23627	3.21521	985.614	FALSE	19
2022-09-14	12:54:52	0.723066	3.21634	3.21521	979.565	FALSE	19
2022-09-14	12:54:52	0.717824	3.19302	3.21521	988.807	FALSE	19
2022-09-14	12:54:53	0.724288	3.22178	3.21731	982.786	FALSE	19
2022-09-14	12:54:53	0.724949	3.22472	3.21731	992.032	FALSE	19
2022-09-14	12:54:53	0.720878	3.20661	3.21731	985.993	FALSE	19
2022-09-14	12:54:53	0.723015	3.21612	3.21731	995.248	FALSE	19
2022-09-14	12:54:54	0.726832	3.23309	3.21051	989.226	FALSE	19
2022-09-14	12:54:54	0.718893	3.19778	3.21051	998.446	FALSE	19
2022-09-14	12:54:54	0.720572	3.20525	3.21051	992.431	FALSE	19
2022-09-14	12:54:54	0.720725	3.20593	3.21051	1001.65	FALSE	19
2022-09-14	12:54:55	0.72444	3.22245	3.23596	995.654	FALSE	19
2022-09-14	12:54:55	0.728104	3.23875	3.23596	1004.89	FALSE	19
2022-09-14	12:54:55	0.729886	3.24668	3.23596	998.9	FALSE	19
2022-09-14	12:54:56	0.730801	3.25075	3.22891	1008.14	FALSE	19
2022-09-14	12:54:56	0.725865	3.22879	3.22891	1002.13	FALSE	19
2022-09-14	12:54:56	0.723982	3.22042	3.22891	1011.36	FALSE	19
2022-09-14	12:54:56	0.722914	3.21567	3.22891	1005.34	FALSE	19
2022-09-14	12:54:57	0.724491	3.22268	3.22466	1014.58	FALSE	19
2022-09-14	12:54:57	0.725763	3.22834	3.22466	1008.57	FALSE	19
2022-09-14	12:54:57	0.724542	3.22291	3.22466	1017.81	FALSE	19
2022-09-14	12:54:57	0.724949	3.22472	3.22466	1011.8	FALSE	19
2022-09-14	12:54:58	0.729173	3.24351	3.2246	1021.05	FALSE	19
2022-09-14	12:54:58	0.721285	3.20842	3.2246	1015.01	FALSE	19
2022-09-14	12:54:58	0.722404	3.2134	3.2246	1024.26	FALSE	19
2022-09-14	12:54:58	0.726832	3.23309	3.2246	1018.24	FALSE	19
2022-09-14	12:54:59	0.722914	3.21567	3.21159	1027.48	FALSE	19
2022-09-14	12:54:59	0.717112	3.18986	3.21159	1021.43	FALSE	19
2022-09-14	12:54:59	0.725967	3.22925	3.21159	1030.71	FALSE	19
2022-09-14	12:55:00	0.725458	3.22698	3.00899	1024.66	FALSE	19
2022-09-14	12:55:00	0.733244	3.26162	3.00899	1033.97	FALSE	19
2022-09-14	12:55:00	0.721997	3.21159	3.00899	1027.87	FALSE	19
2022-09-14	12:55:00	0.525102	2.33576	3.00899	1036.31	FALSE	19
2022-09-14	12:55:01	0.156654	0.696828	1.52161	1028.56	FALSE	19
2022-09-14	12:55:01	0.386323	1.71844	1.52161	1038.03	FALSE	19
2022-09-14	12:55:01	0.562557	2.50237	1.52161	1031.07	FALSE	19
2022-09-14	12:55:01	0.262761	1.16881	1.52161	1039.19	FALSE	19
2022-09-14	12:55:02	0.251463	1.11856	2.14487	1032.19	FALSE	19
2022-09-14	12:55:02	0.240776	1.07102	2.14487	1040.26	FALSE	19
2022-09-14	12:55:02	0.717774	3.1928	2.14487	1035.38	FALSE	19
2022-09-14	12:55:02	0.71874	3.1971	2.14487	1043.46	FALSE	19
2022-09-14	12:55:03	0.721234	3.20819	3.21574	1038.59	FALSE	19
2022-09-14	12:55:03	0.72327	3.21725	3.21574	1046.68	FALSE	19
2022-09-14	12:55:03	0.724288	3.22178	3.21574	1041.81	FALSE	19
2022-09-14	12:55:04	0.539249	2.39869	3.03609	1049.08	FALSE	19
2022-09-14	12:55:04	0.731565	3.25415	3.03609	1045.06	FALSE	19
2022-09-14	12:55:04	0.735941	3.27361	3.03609	1052.35	FALSE	19
2022-09-14	12:55:04	0.723422	3.21793	3.03609	1048.28	FALSE	19
2022-09-14	12:55:05	0.723473	3.21815	3.21912	1055.57	FALSE	19
2022-09-14	12:55:05	0.728868	3.24215	3.21912	1051.52	FALSE	19
2022-09-14	12:55:05	0.724746	3.22382	3.21912	1058.79	FALSE	19
2022-09-14	12:55:05	0.717672	3.19235	3.21912	1054.72	FALSE	19
2022-09-14	12:55:06	0.722507	3.21386	3.20938	1062.01	FALSE	19
2022-09-14	12:55:06	0.724491	3.22268	3.20938	1057.94	FALSE	19
2022-09-14	12:55:06	0.718232	3.19484	3.20938	1065.2	FALSE	19
2022-09-14	12:55:06	0.720776	3.20616	3.20938	1061.14	FALSE	19
2022-09-14	12:55:07	0.726934	3.23355	3.22185	1068.44	FALSE	19
2022-09-14	12:55:07	0.719758	3.20163	3.22185	1064.35	FALSE	19
2022-09-14	12:55:07	0.726221	3.23038	3.22185	1071.67	FALSE	19
2022-09-14	12:55:08	0.728766	3.2417	3.23287	1067.59	FALSE	19
2022-09-14	12:55:08	0.724949	3.22472	3.23287	1074.89	FALSE	19
2022-09-14	12:55:08	0.727239	3.2349	3.23287	1070.82	FALSE	19
2022-09-14	12:55:08	0.72617	3.23015	3.23287	1078.12	FALSE	19
2022-09-14	12:55:09	0.716552	3.18737	3.20338	1074.01	FALSE	19
2022-09-14	12:55:09	0.723524	3.21838	3.20338	1081.34	FALSE	19
2022-09-14	12:55:09	0.722252	3.21272	3.20338	1077.22	FALSE	19
2022-09-14	12:55:09	0.718282	3.19506	3.20338	1084.53	FALSE	19
2022-09-14	12:55:10	0.725662	3.22789	3.21906	1080.45	FALSE	19
2022-09-14	12:55:10	0.723219	3.21702	3.21906	1087.75	FALSE	19
2022-09-14	12:55:10	0.723677	3.21906	3.21906	1083.67	FALSE	19
2022-09-14	12:55:10	0.72215	3.21227	3.21906	1090.96	FALSE	19
2022-09-14	12:55:11	0.732786	3.25958	3.23649	1086.93	FALSE	19
2022-09-14	12:55:11	0.725509	3.22721	3.23649	1094.19	FALSE	19
2022-09-14	12:55:11	0.724491	3.22268	3.23649	1090.15	FALSE	19
2022-09-14	12:55:12	0.724847	3.22426	3.23423	1097.42	FALSE	19
2022-09-14	12:55:12	0.727494	3.23604	3.23423	1093.39	FALSE	19
2022-09-14	12:55:12	0.726425	3.23128	3.23423	1100.65	FALSE	19
2022-09-14	12:55:12	0.72958	3.24532	3.23423	1096.63	FALSE	19
2022-09-14	12:55:13	0.729886	3.24668	3.23768	1103.89	FALSE	19
2022-09-14	12:55:13	0.73187	3.2555	3.23768	1099.89	FALSE	19
2022-09-14	12:55:13	0.721234	3.20819	3.23768	1107.1	FALSE	19
2022-09-14	12:55:13	0.728461	3.24034	3.23768	1103.13	FALSE	19
2022-09-14	12:55:14	0.724898	3.22449	3.22308	1110.33	FALSE	19
2022-09-14	12:55:14	0.72729	3.23513	3.22308	1106.36	FALSE	19
2022-09-14	12:55:14	0.723066	3.21634	3.22308	1113.54	FALSE	19
2022-09-14	12:55:14	0.723066	3.21634	3.22308	1109.58	FALSE	19
2022-09-14	12:55:15	0.72958	3.24532	3.24034	1116.79	FALSE	19
2022-09-14	12:55:15	0.72785	3.23762	3.24034	1112.82	FALSE	19
2022-09-14	12:55:15	0.727952	3.23808	3.24034	1120.03	FALSE	19
2022-09-14	12:55:16	0.721591	3.20978	3.22738	1116.03	FALSE	19
2022-09-14	12:55:16	0.725254	3.22607	3.22738	1123.25	FALSE	19
2022-09-14	12:55:16	0.729936	3.2469	3.22738	1119.27	FALSE	19
2022-09-14	12:55:16	0.725407	3.22676	3.22738	1126.48	FALSE	19
2022-09-14	12:55:17	0.723473	3.21815	4.12942	1122.49	FALSE	19
2022-09-14	12:55:17	1.53676	6.83582	4.12942	1133.31	FALSE	19
2022-09-14	12:55:17	0.726272	3.2306	4.12942	1125.72	FALSE	19
2022-09-14	12:55:17	0.726832	3.23309	4.12942	1136.55	FALSE	19
2022-09-14	12:55:18	0.725153	3.22563	3.23875	1128.95	FALSE	19
2022-09-14	12:55:18	0.730343	3.24871	3.23875	1139.8	FALSE	19
2022-09-14	12:55:18	0.728817	3.24192	3.23875	1132.19	FALSE	19
2022-09-14	12:55:19	0.726323	3.23083	3.23032	1143.03	FALSE	19
2022-09-14	12:55:19	0.722914	3.21567	3.23032	1135.41	FALSE	19
2022-09-14	12:55:19	0.732634	3.2589	3.23032	1146.29	FALSE	19
2022-09-14	12:55:19	0.722965	3.21589	3.23032	1138.62	FALSE	19
2022-09-14	12:55:20	0.728562	3.24079	3.22992	1149.53	FALSE	19
2022-09-14	12:55:20	0.719656	3.20117	3.22992	1141.82	FALSE	19
2022-09-14	12:55:20	0.727392	3.23559	3.22992	1152.76	FALSE	19
2022-09-14	12:55:20	0.728868	3.24215	3.22992	1145.07	FALSE	19
2022-09-14	12:55:21	3.03579	13.5038	5.78504	1166.27	1	20
2022-09-14	12:55:21	0.725204	3.22585	5.78504	1148.29	FALSE	20
2022-09-14	12:55:21	0.727239	3.2349	5.78504	1169.5	FALSE	20
2022-09-14	12:55:21	0.713906	3.1756	5.78504	1151.47	FALSE	20
2022-09-14	12:55:22	0.70388	3.131	3.23807	1172.63	FALSE	20
2022-09-14	12:55:22	0.580623	2.58273	3.23807	1154.05	FALSE	20
2022-09-14	12:55:22	0.899351	4.00049	3.23807	1176.63	FALSE	20
2022-09-14	12:55:23	0.893702	3.97537	-0.0276729	1158.03	FALSE	20
2022-09-14	12:55:23	-0.0145926	-0.0649108	-0.0276729	1176.63	FALSE	20
2022-09-14	12:55:23	-0.377035	-1.67713	-0.0276729	1158.03	FALSE	20
2022-09-14	12:55:23	-0.526959	-2.34402	-0.0276729	1176.63	FALSE	20
2022-09-14	12:55:24	-0.602226	-2.67882	-3.32211	1158.03	FALSE	20
2022-09-14	12:55:24	-0.740699	-3.29478	-3.32211	1176.63	FALSE	20
2022-09-14	12:55:24	-0.773269	-3.43966	-3.32211	1158.03	FALSE	20
2022-09-14	12:55:24	-0.871183	-3.8752	-3.32211	1176.63	FALSE	20
2022-09-14	12:55:25	-0.92421	-4.11107	-4.8834	1158.03	FALSE	20
2022-09-14	12:55:25	-1.07271	-4.77163	-4.8834	1176.63	FALSE	20
2022-09-14	12:55:25	-1.17027	-5.2056	-4.8834	1158.03	FALSE	20
2022-09-14	12:55:25	-1.22416	-5.44531	-4.8834	1176.63	FALSE	20
2022-09-14	12:55:26	-1.30294	-5.79574	-6.4006	1158.03	FALSE	20
2022-09-14	12:55:26	-1.3921	-6.19234	-6.4006	1176.63	FALSE	20
2022-09-14	12:55:26	-1.62172	-7.21373	-6.4006	1158.03	FALSE	20
2022-09-14	12:55:27	-1.49347	-6.64325	-1.85115	1176.63	FALSE	20
2022-09-14	12:55:27	-1.38915	-6.17922	-1.85115	1158.03	FALSE	20
2022-09-14	12:55:27	-0.480139	-2.13575	-1.85115	1176.63	FALSE	20
2022-09-14	12:55:27	1.69813	7.55362	-1.85115	1165.58	FALSE	20
2022-09-14	12:55:28	2.19604	9.76843	4.41277	1186.4	FALSE	20
2022-09-14	12:55:28	0.414771	1.84498	4.41277	1167.42	FALSE	20
2022-09-14	12:55:28	1.36006	6.04982	4.41277	1192.45	FALSE	20
2022-09-14	12:55:28	-0.00273512	-0.0121664	4.41277	1167.42	FALSE	20
2022-09-14	12:55:29	-0.273575	-1.21692	-0.570116	1192.45	FALSE	20
2022-09-14	12:55:29	-0.262175	-1.16621	-0.570116	1167.42	FALSE	20
2022-09-14	12:55:29	0.405	1.80152	-0.570116	1194.25	FALSE	20
2022-09-14	12:55:29	-0.381921	-1.69886	-0.570116	1167.42	FALSE	20
2022-09-14	12:55:30	-0.887518	-3.94786	-3.1416	1194.25	FALSE	20
2022-09-14	12:55:30	-0.750267	-3.33734	-3.1416	1167.42	FALSE	20
2022-09-14	12:55:30	-0.481005	-2.13961	-3.1416	1194.25	FALSE	20
2022-09-14	12:55:31	0.181489	0.807299	-0.501072	1168.23	FALSE	20
2022-09-14	12:55:31	0.232888	1.03593	-0.501072	1195.29	FALSE	20
2022-09-14	12:55:31	-0.333931	-1.48539	-0.501072	1168.23	FALSE	20
2022-09-14	12:55:31	-0.53103	-2.36213	-0.501072	1195.29	FALSE	20
2022-09-14	12:55:32	-0.418918	-1.86343	-1.46807	1168.23	FALSE	20
2022-09-14	12:55:32	-0.453524	-2.01737	-1.46807	1195.29	FALSE	20
2022-09-14	12:55:32	-0.254949	-1.13406	-1.46807	1168.23	FALSE	20
2022-09-14	12:55:32	-0.19276	-0.857435	-1.46807	1195.29	FALSE	20
2022-09-14	12:55:33	-0.245229	-1.09083	-0.513636	1168.23	FALSE	20
2022-09-14	12:55:33	-0.156119	-0.694449	-0.513636	1195.29	FALSE	20
2022-09-14	12:55:33	-0.0377987	-0.168136	-0.513636	1168.23	FALSE	20
2022-09-14	12:55:33	-0.0227351	-0.10113	-0.513636	1195.29	FALSE	20
2022-09-14	12:55:34	-0.0406995	-0.18104	-0.531613	1168.23	FALSE	20
2022-09-14	12:55:34	0.000470984	0.00209503	-0.531613	1195.29	FALSE	20
2022-09-14	12:55:34	-0.318307	-1.41589	-0.531613	1168.23	FALSE	20
2022-09-14	12:55:35	-1.03179	-4.58961	-5.3093	1195.29	FALSE	20
2022-09-14	12:55:35	-1.21805	-5.41813	-5.3093	1168.23	FALSE	20
2022-09-14	12:55:35	-1.24635	-5.54401	-5.3093	1195.29	FALSE	20
2022-09-14	12:55:35	-1.27815	-5.68547	-5.3093	1168.23	FALSE	20
2022-09-14	12:55:36	-1.34925	-6.00173	-5.98158	1195.29	FALSE	20
2022-09-14	12:55:36	-1.4094	-6.26929	-5.98158	1168.23	FALSE	20
2022-09-14	12:55:36	-1.23139	-5.47747	-5.98158	1195.29	FALSE	20
2022-09-14	12:55:36	-1.38884	-6.17784	-5.98158	1168.23	FALSE	20
2022-09-14	12:55:37	-1.50553	-6.6969	-7.2088	1195.29	FALSE	20
2022-09-14	12:55:37	-1.6263	-7.23411	-7.2088	1168.23	FALSE	20
2022-09-14	12:55:37	-1.54803	-6.88595	-7.2088	1195.29	FALSE	20
2022-09-14	12:55:37	-1.80258	-8.01824	-7.2088	1168.23	FALSE	20
2022-09-14	12:55:38	-2.43617	-10.8366	-9.40379	1195.29	FALSE	20
2022-09-14	12:55:38	-2.05276	-9.13109	-9.40379	1168.23	FALSE	20
2022-09-14	12:55:38	-1.85327	-8.24372	-9.40379	1195.29	FALSE	20
2022-09-14	12:55:39	-1.08757	-4.83773	-3.81119	1168.23	FALSE	20
2022-09-14	12:55:39	-0.403142	-1.79326	-3.81119	1195.29	FALSE	20
2022-09-14	12:55:39	-1.11826	-4.97424	-3.81119	1168.23	FALSE	20
2022-09-14	12:55:39	-0.818205	-3.63954	-3.81119	1195.29	FALSE	20
2022-09-14	12:55:40	-1.19515	-5.31627	-6.13234	1168.23	FALSE	20
2022-09-14	12:55:40	-1.53393	-6.82323	-6.13234	1195.29	FALSE	20
2022-09-14	12:55:40	-1.59882	-7.11187	-6.13234	1168.23	FALSE	20
2022-09-14	12:55:40	-1.18655	-5.27801	-6.13234	1195.29	FALSE	20
2022-09-14	12:55:41	-1.36487	-6.07121	-6.55844	1168.23	FALSE	20
2022-09-14	12:55:41	-1.58732	-7.06072	-6.55844	1195.29	FALSE	20
2022-09-14	12:55:41	-1.38859	-6.17673	-6.55844	1168.23	FALSE	20
2022-09-14	12:55:41	-1.55683	-6.92509	-6.55844	1195.29	FALSE	20
2022-09-14	12:55:42	-1.49113	-6.63284	-3.24935	1168.23	FALSE	20
2022-09-14	12:55:42	-0.450979	-2.00604	-3.24935	1195.29	FALSE	20
2022-09-14	12:55:42	-0.249351	-1.10916	-3.24935	1168.23	FALSE	20
2022-09-14	12:55:43	-0.384363	-1.70972	-1.61063	1195.29	FALSE	20
2022-09-14	12:55:43	-0.316933	-1.40978	-1.61063	1168.23	FALSE	20
2022-09-14	12:55:43	-0.373575	-1.66174	-1.61063	1195.29	FALSE	20
2022-09-14	12:55:43	-0.373473	-1.66128	-1.61063	1168.23	FALSE	20
2022-09-14	12:55:44	-0.648027	-2.88255	-3.45363	1195.29	FALSE	20
2022-09-14	12:55:44	-0.780292	-3.47089	-3.45363	1168.23	FALSE	20
2022-09-14	12:55:44	-0.794999	-3.53631	-3.45363	1195.29	FALSE	20
2022-09-14	12:55:44	-0.882328	-3.92477	-3.45363	1168.23	FALSE	20
2022-09-14	12:55:45	-0.847417	-3.76948	-3.46788	1195.29	FALSE	20
2022-09-14	12:55:45	-0.832658	-3.70383	-3.46788	1168.23	FALSE	20
2022-09-14	12:55:45	-0.658765	-2.93032	-3.46788	1195.29	FALSE	20
2022-09-14	12:55:46	-0.515712	-2.29399	-1.94238	1168.23	FALSE	20
2022-09-14	12:55:46	-0.433066	-1.92636	-1.94238	1195.29	FALSE	20
2022-09-14	12:55:46	-0.398206	-1.7713	-1.94238	1168.23	FALSE	20
2022-09-14	12:55:46	-0.399681	-1.77786	-1.94238	1195.29	FALSE	20
2022-09-14	12:55:47	-0.183346	-0.81556	-0.721954	1168.23	FALSE	20
2022-09-14	12:55:47	-0.192964	-0.858342	-0.721954	1195.29	FALSE	20
2022-09-14	12:55:47	-0.245076	-1.09015	-0.721954	1168.23	FALSE	20
2022-09-14	12:55:47	-0.0278242	-0.123768	-0.721954	1195.29	FALSE	20
2022-09-14	12:55:48	-0.185178	-0.823709	-0.599431	1168.23	FALSE	20
2022-09-14	12:55:48	-0.122888	-0.54663	-0.599431	1195.29	FALSE	20
2022-09-14	12:55:48	-0.135305	-0.601864	-0.599431	1168.23	FALSE	20
2022-09-14	12:55:48	-0.0956613	-0.425521	-0.599431	1195.29	FALSE	20
2022-09-14	12:55:49	-0.0794272	-0.353308	-0.38832	1168.23	FALSE	20
2022-09-14	12:55:49	-0.0850761	-0.378436	-0.38832	1195.29	FALSE	20
2022-09-14	12:55:49	-0.0973915	-0.433217	-0.38832	1168.23	FALSE	20
2022-09-14	12:55:50	-0.104872	-0.466492	0.313072	1195.29	FALSE	20
2022-09-14	12:55:50	0.106832	0.47521	0.313072	1168.71	FALSE	20
2022-09-14	12:55:50	-0.000597729	-0.00265882	0.313072	1195.29	FALSE	20
2022-09-14	12:55:50	0.280165	1.24623	0.313072	1169.95	FALSE	20
2022-09-14	12:55:51	0.199504	0.887434	1.19552	1196.18	FALSE	20
2022-09-14	12:55:51	0.325763	1.44906	1.19552	1171.4	FALSE	20
2022-09-14	12:55:51	0.266985	1.1876	1.19552	1197.37	FALSE	20
2022-09-14	12:55:51	0.282812	1.258	1.19552	1172.66	FALSE	20
2022-09-14	12:55:52	0.260776	1.15998	1.25704	1198.53	FALSE	20
2022-09-14	12:55:52	0.244389	1.08709	1.25704	1173.75	FALSE	20
2022-09-14	12:55:52	0.366425	1.62993	1.25704	1200.16	FALSE	20
2022-09-14	12:55:52	0.258791	1.15115	1.25704	1174.9	FALSE	20
2022-09-14	12:55:53	0.356349	1.58511	1.45427	1201.74	FALSE	20
2022-09-14	12:55:53	0.351463	1.56338	1.45427	1176.46	FALSE	20
2022-09-14	12:55:53	0.27299	1.21431	1.45427	1202.95	FALSE	20
2022-09-14	12:55:54	0.354669	1.57764	1.99631	1178.04	FALSE	20
2022-09-14	12:55:54	0.376807	1.67611	1.99631	1204.63	FALSE	20
2022-09-14	12:55:54	0.529733	2.35636	1.99631	1180.4	FALSE	20
2022-09-14	12:55:54	0.533957	2.37515	1.99631	1207.01	FALSE	20
2022-09-14	12:55:55	0.47528	2.11414	1.93768	1182.51	FALSE	20
2022-09-14	12:55:55	0.439198	1.95364	1.93768	1208.96	FALSE	20
2022-09-14	12:55:55	0.407443	1.81239	1.93768	1184.32	FALSE	20
2022-09-14	12:55:55	0.420522	1.87057	1.93768	1210.83	FALSE	20
2022-09-14	12:55:56	0.479555	2.13316	1.88873	1186.45	FALSE	20
2022-09-14	12:55:56	0.476043	2.11753	1.88873	1212.95	FALSE	20
2022-09-14	12:55:56	0.36098	1.60571	1.88873	1188.06	FALSE	20
2022-09-14	12:55:56	0.381845	1.69852	1.88873	1214.65	FALSE	20
2022-09-14	12:55:57	0.373397	1.66094	1.48128	1189.72	FALSE	20
2022-09-14	12:55:57	0.309631	1.3773	1.48128	1216.02	FALSE	20
2022-09-14	12:55:57	0.315992	1.4056	1.48128	1191.13	FALSE	20
2022-09-14	12:55:58	0.22388	0.995863	1.67492	1217.02	FALSE	20
2022-09-14	12:55:58	0.285967	1.27204	1.67492	1192.4	FALSE	20
2022-09-14	12:55:58	0.604898	2.69071	1.67492	1219.71	FALSE	20
2022-09-14	12:55:58	0.391412	1.74108	1.67492	1194.14	FALSE	20
2022-09-14	12:55:59	0.482964	2.14832	1.92059	1221.86	FALSE	20
2022-09-14	12:55:59	0.365051	1.62382	1.92059	1195.76	FALSE	20
2022-09-14	12:55:59	0.409529	1.82167	1.92059	1223.68	FALSE	20
2022-09-14	12:55:59	0.469529	2.08856	1.92059	1197.85	FALSE	20
2022-09-14	12:56:00	0.418435	1.86128	1.91465	1225.54	FALSE	20
2022-09-14	12:56:00	0.473499	2.10622	1.91465	1199.96	FALSE	20
2022-09-14	12:56:00	0.448512	1.99507	1.91465	1227.54	FALSE	20
2022-09-14	12:56:00	0.381285	1.69603	1.91465	1201.65	FALSE	20
2022-09-14	12:56:01	0.37411	1.66412	1.65249	1229.2	FALSE	20
2022-09-14	12:56:01	0.43701	1.94391	1.65249	1203.6	FALSE	20
2022-09-14	12:56:01	0.303372	1.34946	1.65249	1230.55	FALSE	20
2022-09-14	12:56:02	0.384898	1.7121	1.91324	1205.31	FALSE	20
2022-09-14	12:56:02	0.426221	1.89592	1.91324	1232.45	FALSE	20
2022-09-14	12:56:02	0.39355	1.75059	1.91324	1207.06	FALSE	20
2022-09-14	12:56:02	0.515789	2.29433	1.91324	1234.74	FALSE	20
2022-09-14	12:56:03	0.544745	2.42313	2.28392	1209.48	FALSE	20
2022-09-14	12:56:03	0.545763	2.42766	2.28392	1237.17	FALSE	20
2022-09-14	12:56:03	0.458181	2.03808	2.28392	1211.52	FALSE	20
2022-09-14	12:56:03	0.505102	2.24679	2.28392	1239.41	FALSE	20
2022-09-14	12:56:04	0.295738	1.3155	1.70667	1212.84	FALSE	20
2022-09-14	12:56:04	0.31701	1.41012	1.70667	1240.82	FALSE	20
2022-09-14	12:56:04	0.421743	1.876	1.70667	1214.71	FALSE	20
2022-09-14	12:56:04	0.500216	2.22506	1.70667	1243.05	FALSE	20
2022-09-14	12:56:05	0.511005	2.27305	3.14564	1216.99	FALSE	20
2022-09-14	12:56:05	0.775687	3.45041	3.14564	1246.5	FALSE	20
2022-09-14	12:56:05	0.834822	3.71346	3.14564	1220.7	FALSE	20
2022-09-14	12:56:06	0.747341	3.32432	2.60571	1249.82	FALSE	20
2022-09-14	12:56:06	0.569275	2.53225	2.60571	1223.23	FALSE	20
2022-09-14	12:56:06	0.506934	2.25494	2.60571	1252.08	FALSE	20
2022-09-14	12:56:06	0.519606	2.31131	2.60571	1225.54	FALSE	20
2022-09-14	12:56:07	0.537265	2.38986	3.77423	1254.47	FALSE	20
2022-09-14	12:56:07	0.637163	2.83423	3.77423	1228.38	FALSE	20
2022-09-14	12:56:07	0.945763	4.20694	3.77423	1258.68	FALSE	20
2022-09-14	12:56:07	1.27375	5.66589	3.77423	1234.04	FALSE	20
2022-09-14	12:56:08	1.30719	5.81464	5.1619	1264.49	FALSE	20
2022-09-14	12:56:08	1.1508	5.11899	5.1619	1239.16	FALSE	20
2022-09-14	12:56:08	1.18307	5.26253	5.1619	1269.75	FALSE	20
2022-09-14	12:56:08	1.00073	4.45145	5.1619	1243.61	FALSE	20
2022-09-14	12:56:09	0.86958	3.86807	3.68101	1273.62	FALSE	20
2022-09-14	12:56:09	0.800623	3.56133	3.68101	1247.18	FALSE	20
2022-09-14	12:56:09	0.812379	3.61362	3.68101	1277.24	FALSE	20
2022-09-14	12:56:10	0.867341	3.85811	3.9572	1251.03	FALSE	20
2022-09-14	12:56:10	0.857265	3.81329	3.9572	1281.05	FALSE	20
2022-09-14	12:56:10	0.923117	4.10621	3.9572	1255.14	FALSE	20
2022-09-14	12:56:10	0.910751	4.0512	3.9572	1285.1	FALSE	20
2022-09-14	12:56:11	0.858639	3.8194	3.54232	1258.96	FALSE	20
2022-09-14	12:56:11	0.885254	3.93779	3.54232	1289.04	FALSE	20
2022-09-14	12:56:11	0.739249	3.28833	3.54232	1262.25	FALSE	20
2022-09-14	12:56:11	0.702252	3.12376	3.54232	1292.16	FALSE	20
2022-09-14	12:56:12	0.830598	3.69467	3.05918	1265.94	FALSE	20
2022-09-14	12:56:12	0.651361	2.89738	3.05918	1295.06	FALSE	20
2022-09-14	12:56:12	0.630191	2.80322	3.05918	1268.75	FALSE	20
2022-09-14	12:56:12	0.638791	2.84147	3.05918	1297.9	FALSE	20
2022-09-14	12:56:13	0.721895	3.21113	2.87573	1271.96	FALSE	20
2022-09-14	12:56:13	0.657265	2.92365	2.87573	1300.82	FALSE	20
2022-09-14	12:56:13	0.560318	2.49241	2.87573	1274.45	FALSE	20
2022-09-14	12:56:14	0.540165	2.40276	2.48443	1303.23	FALSE	20
2022-09-14	12:56:14	0.518944	2.30837	2.48443	1276.76	FALSE	20
2022-09-14	12:56:14	0.573702	2.55194	2.48443	1305.78	FALSE	20
2022-09-14	12:56:14	0.601285	2.67464	2.48443	1279.43	FALSE	20
2022-09-14	12:56:15	0.643524	2.86252	2.89744	1308.64	FALSE	20
2022-09-14	12:56:15	0.63986	2.84623	2.89744	1282.28	FALSE	20
2022-09-14	12:56:15	0.646425	2.87543	2.89744	1311.52	FALSE	20
2022-09-14	12:56:15	0.675687	3.00559	2.89744	1285.28	FALSE	20
2022-09-14	12:56:16	0.642914	2.85981	2.62989	1314.38	FALSE	20
2022-09-14	12:56:16	0.596399	2.6529	2.62989	1287.94	FALSE	20
2022-09-14	12:56:16	0.534364	2.37696	2.62989	1316.75	FALSE	20
2022-09-14	12:56:17	0.488104	2.17118	2.19082	1290.11	FALSE	20
2022-09-14	12:56:17	0.502659	2.23593	2.19082	1318.99	FALSE	20
2022-09-14	12:56:17	0.473804	2.10757	2.19082	1292.22	FALSE	20
2022-09-14	12:56:17	0.505509	2.24861	2.19082	1321.24	FALSE	20
2022-09-14	12:56:18	0.513092	2.28234	2.25127	1294.5	FALSE	20
2022-09-14	12:56:18	0.502303	2.23434	2.25127	1323.47	FALSE	20
2022-09-14	12:56:18	0.485051	2.1576	2.25127	1296.66	FALSE	20
2022-09-14	12:56:18	0.523982	2.33078	2.25127	1325.8	FALSE	20
2022-09-14	12:56:19	0.584084	2.59812	2.62184	1299.25	FALSE	20
2022-09-14	12:56:19	0.581845	2.58816	2.62184	1328.39	FALSE	20
2022-09-14	12:56:19	0.574415	2.55511	2.62184	1301.81	FALSE	20
2022-09-14	12:56:19	0.617316	2.74595	2.62184	1331.14	FALSE	20
2022-09-14	12:56:20	0.660216	2.93677	2.99412	1304.75	FALSE	20
2022-09-14	12:56:20	0.672685	2.99224	2.99412	1334.13	FALSE	20
2022-09-14	12:56:20	0.686425	3.05336	2.99412	1307.8	FALSE	20
2022-09-14	12:56:21	0.696654	3.09886	4.10055	1337.23	FALSE	20
2022-09-14	12:56:21	0.858689	3.81962	4.10055	1311.62	FALSE	20
2022-09-14	12:56:21	1.10536	4.91686	4.10055	1342.14	FALSE	20
2022-09-14	12:56:21	1.02668	4.56688	4.10055	1316.19	FALSE	20
2022-09-14	12:56:22	1.05024	4.67168	4.31532	1346.82	FALSE	20
2022-09-14	12:56:22	0.884033	3.93236	4.31532	1320.12	FALSE	20
2022-09-14	12:56:22	0.985458	4.38351	4.31532	1351.2	FALSE	20
2022-09-14	12:56:22	0.960776	4.27372	4.31532	1324.39	FALSE	20
2022-09-14	12:56:23	0.959657	4.26875	4.71237	1355.47	FALSE	20
2022-09-14	12:56:23	0.980114	4.35974	4.71237	1328.75	FALSE	20
2022-09-14	12:56:23	1.13823	5.06307	4.71237	1360.53	FALSE	20
2022-09-14	12:56:23	1.15955	5.15791	4.71237	1333.91	FALSE	20
2022-09-14	12:56:24	1.22658	5.45607	5.32771	1365.99	FALSE	20
2022-09-14	12:56:24	1.31767	5.86126	5.32771	1339.77	FALSE	20
2022-09-14	12:56:24	1.04892	4.66581	5.32771	1370.65	FALSE	20
2022-09-14	12:56:25	0.975229	4.33801	4.5092	1344.11	FALSE	20
2022-09-14	12:56:25	0.984186	4.37786	4.5092	1375.03	FALSE	20
2022-09-14	12:56:25	1.02047	4.53925	4.5092	1348.65	FALSE	20
2022-09-14	12:56:25	1.07497	4.78168	4.5092	1379.81	FALSE	20
2022-09-14	12:56:26	1.17497	5.2265	3.91101	1353.87	FALSE	20
2022-09-14	12:56:26	1.11599	4.96415	3.91101	1384.78	FALSE	20
2022-09-14	12:56:26	0.791311	3.51991	3.91101	1357.39	FALSE	20
2022-09-14	12:56:26	0.434669	1.93349	3.91101	1386.71	FALSE	20
2022-09-14	12:56:27	-0.968892	-4.30983	-5.6591	1357.39	FALSE	20
2022-09-14	12:56:27	-1.23128	-5.47698	-5.6591	1386.71	FALSE	20
2022-09-14	12:56:27	-1.38558	-6.16334	-5.6591	1357.39	FALSE	20
2022-09-14	12:56:27	-1.50314	-6.68627	-5.6591	1386.71	FALSE	20
2022-09-14	12:56:28	-1.56961	-6.98194	-7.16746	1357.39	FALSE	20
2022-09-14	12:56:28	-1.60731	-7.14964	-7.16746	1386.71	FALSE	20
2022-09-14	12:56:28	-1.65703	-7.3708	-7.16746	1357.39	FALSE	20
2022-09-14	12:56:29	-1.70192	-7.57048	-8.3595	1386.71	FALSE	20
2022-09-14	12:56:29	-1.87312	-8.33201	-8.3595	1357.39	FALSE	20
2022-09-14	12:56:29	-1.93668	-8.61474	-8.3595	1386.71	FALSE	20
2022-09-14	12:56:29	-2.00548	-8.92078	-8.3595	1357.39	FALSE	20
2022-09-14	12:56:30	-2.05805	-9.15462	-9.57884	1386.71	FALSE	20
2022-09-14	12:56:30	-2.07225	-9.21778	-9.57884	1357.39	FALSE	20
2022-09-14	12:56:30	-2.18533	-9.72078	-9.57884	1386.71	FALSE	20
2022-09-14	12:56:30	-2.29805	-10.2222	-9.57884	1357.39	FALSE	20
2022-09-14	12:56:31	-2.55902	-11.383	-12.3064	1386.71	FALSE	20
2022-09-14	12:56:31	-2.65357	-11.8036	-12.3064	1357.39	FALSE	20
2022-09-14	12:56:31	-2.92645	-13.0174	-12.3064	1386.71	FALSE	20
2022-09-14	12:56:31	-2.92736	-13.0215	-12.3064	1357.39	FALSE	20
2022-09-14	12:56:32	-3.15576	-14.0375	-14.6637	1386.71	FALSE	20
2022-09-14	12:56:32	-3.21159	-14.2858	-14.6637	1357.39	FALSE	20
2022-09-14	12:56:32	-3.52228	-15.6678	-14.6637	1386.71	FALSE	20
2022-09-14	12:56:33	-3.55978	-15.8346	-15.2785	1357.39	FALSE	20
2022-09-14	12:56:33	-3.46462	-15.4113	-15.2785	1386.71	FALSE	20
2022-09-14	12:56:33	-3.37515	-15.0133	-15.2785	1357.39	FALSE	20
2022-09-14	12:56:33	-3.33953	-14.8549	-15.2785	1386.71	FALSE	20
2022-09-14	12:56:34	-2.40085	-10.6795	-0.243856	1357.39	FALSE	20
2022-09-14	12:56:34	0.72785	3.23762	-0.243856	1389.95	FALSE	20
2022-09-14	12:56:34	0.725305	3.2263	-0.243856	1360.62	FALSE	20
2022-09-14	12:56:34	0.72841	3.24011	-0.243856	1393.19	FALSE	20
2022-09-14	12:56:35	0.727188	3.23468	3.22557	1363.86	FALSE	20
2022-09-14	12:56:35	0.727239	3.2349	3.22557	1396.42	FALSE	20
2022-09-14	12:56:35	0.72271	3.21476	3.22557	1367.07	FALSE	20
2022-09-14	12:56:35	0.723422	3.21793	3.22557	1399.64	FALSE	20
2022-09-14	12:56:36	0.729377	3.24441	3.21619	1370.31	FALSE	20
2022-09-14	12:56:36	0.719198	3.19914	3.21619	1402.84	FALSE	20
2022-09-14	12:56:36	0.720521	3.20502	3.21619	1373.52	FALSE	20
2022-09-14	12:56:37	0.707952	3.14911	3.14526	1405.99	FALSE	20
2022-09-14	12:56:37	0.710293	3.15953	3.14526	1376.68	FALSE	20
2022-09-14	12:56:37	0.705814	3.1396	3.14526	1409.13	FALSE	20
2022-09-14	12:56:37	0.704288	3.13281	3.14526	1379.81	FALSE	20
2022-09-14	12:56:38	-0.348129	-1.54855	-5.76659	1409.13	FALSE	20
2022-09-14	12:56:38	-1.68823	-7.50958	-5.76659	1379.81	FALSE	20
2022-09-14	12:56:38	-1.65134	-7.34549	-5.76659	1409.13	FALSE	20
2022-09-14	12:56:38	-1.49785	-6.66274	-5.76659	1379.81	FALSE	20
2022-09-14	12:56:39	0.325102	1.44612	2.0078	1410.58	FALSE	20
2022-09-14	12:56:39	0.517519	2.30203	2.0078	1382.11	FALSE	20
2022-09-14	12:56:39	0.461743	2.05393	2.0078	1412.63	FALSE	20
2022-09-14	12:56:39	0.501132	2.22914	2.0078	1384.34	FALSE	20
2022-09-14	12:56:40	0.386272	1.71822	1.81541	1414.35	FALSE	20
2022-09-14	12:56:40	0.402252	1.7893	1.81541	1386.13	FALSE	20
2022-09-14	12:56:40	0.43584	1.9387	1.81541	1416.29	FALSE	20
2022-09-14	12:56:41	0.413651	1.84	1.7979	1387.97	FALSE	20
2022-09-14	12:56:41	0.366018	1.62812	1.7979	1417.91	FALSE	20
2022-09-14	12:56:41	0.424338	1.88754	1.7979	1389.86	FALSE	20
2022-09-14	12:56:41	0.412735	1.83593	1.7979	1419.75	FALSE	20
2022-09-14	12:56:42	0.390903	1.73881	2.05138	1391.6	FALSE	20
2022-09-14	12:56:42	0.466629	2.07566	2.05138	1421.83	FALSE	20
2022-09-14	12:56:42	0.463982	2.06388	2.05138	1393.66	FALSE	20
2022-09-14	12:56:42	0.523168	2.32716	2.05138	1424.15	FALSE	20
2022-09-14	12:56:43	0.497367	2.21239	2.06191	1395.88	FALSE	20
2022-09-14	12:56:43	0.508155	2.26038	2.06191	1426.41	FALSE	20
2022-09-14	12:56:43	0.456603	2.03106	2.06191	1397.91	FALSE	20
2022-09-14	12:56:43	0.392023	1.7438	2.06191	1428.16	FALSE	20
2022-09-14	12:56:44	0.364644	1.62201	1.68577	1399.53	FALSE	20
2022-09-14	12:56:44	0.35472	1.57787	1.68577	1429.74	FALSE	20
2022-09-14	12:56:44	0.41757	1.85743	1.68577	1401.39	FALSE	20
2022-09-14	12:56:45	0.466069	2.07317	1.78907	1431.81	FALSE	20
2022-09-14	12:56:45	0.408461	1.81692	1.78907	1403.2	FALSE	20
2022-09-14	12:56:45	0.368461	1.63899	1.78907	1433.45	FALSE	20
2022-09-14	12:56:45	0.365814	1.62721	1.78907	1404.83	FALSE	20
2022-09-14	12:56:46	0.378537	1.68381	1.81154	1435.13	FALSE	20
2022-09-14	12:56:46	0.461998	2.05506	1.81154	1406.88	FALSE	20
2022-09-14	12:56:46	0.330089	1.4683	1.81154	1436.6	FALSE	20
2022-09-14	12:56:46	0.458384	2.03898	1.81154	1408.92	FALSE	20
2022-09-14	12:56:47	0.499758	2.22302	2.55115	1438.82	FALSE	20
2022-09-14	12:56:47	0.582761	2.59224	2.55115	1411.52	FALSE	20
2022-09-14	12:56:47	0.610496	2.71561	2.55115	1441.54	FALSE	20
2022-09-14	12:56:47	0.601081	2.67373	2.55115	1414.19	FALSE	20
2022-09-14	12:56:48	0.514262	2.28754	2.20816	1443.83	FALSE	20
2022-09-14	12:56:48	0.481183	2.1404	2.20816	1416.33	FALSE	20
2022-09-14	12:56:48	0.493804	2.19654	2.20816	1446.02	FALSE	20
2022-09-14	12:56:49	0.442456	1.96813	1.89094	1418.3	FALSE	20
2022-09-14	12:56:49	0.465356	2.07	1.89094	1448.09	FALSE	20
2022-09-14	12:56:49	0.375026	1.66819	1.89094	1419.97	FALSE	20
2022-09-14	12:56:49	0.41757	1.85743	1.89094	1449.95	FALSE	20
2022-09-14	12:56:50	0.429886	1.91222	1.89875	1421.88	FALSE	20
2022-09-14	12:56:50	0.401641	1.78658	1.89875	1451.74	FALSE	20
2022-09-14	12:56:50	0.441336	1.96315	1.89875	1423.84	FALSE	20
2022-09-14	12:56:50	0.434568	1.93305	1.89875	1453.67	FALSE	20
2022-09-14	12:56:51	0.533804	2.37447	2.48448	1426.22	FALSE	20
2022-09-14	12:56:51	0.614822	2.73485	2.48448	1456.4	FALSE	20
2022-09-14	12:56:51	0.569479	2.53316	2.48448	1428.75	FALSE	20
2022-09-14	12:56:51	0.516043	2.29546	2.48448	1458.7	FALSE	20
2022-09-14	12:56:52	0.582303	2.5902	2.22733	1431.34	FALSE	20
2022-09-14	12:56:52	0.443524	1.97288	2.22733	1460.67	FALSE	20
2022-09-14	12:56:52	0.476349	2.1189	2.22733	1433.46	FALSE	20
2022-09-14	12:56:53	0.520471	2.31516	3.9448	1462.99	FALSE	20
2022-09-14	12:56:53	0.510038	2.26875	3.9448	1435.73	FALSE	20
2022-09-14	12:56:53	0.915534	4.07248	3.9448	1467.06	FALSE	20
2022-09-14	12:56:53	1.60128	7.12281	3.9448	1442.85	FALSE	20
2022-09-14	12:56:54	2.8993	12.8967	13.9531	1479.96	FALSE	20
2022-09-14	12:56:54	3.73375	16.6085	13.9531	1459.46	1	21
2022-09-14	12:56:54	3.50327	15.5832	13.9531	1495.54	1	22
2022-09-14	12:56:54	2.4109	10.7242	13.9531	1470.18	FALSE	22
2022-09-14	12:56:55	1.96933	8.75997	10.389	1504.3	FALSE	22
2022-09-14	12:56:55	1.91299	8.50936	10.389	1478.69	FALSE	22
2022-09-14	12:56:55	3.12434	13.8977	10.389	1518.2	1	23
2022-09-14	12:56:56	3.18088	14.1492	10.7017	1492.84	1	24
2022-09-14	12:56:56	2.51375	11.1817	10.7017	1529.38	FALSE	24
2022-09-14	12:56:56	2.29248	10.1974	10.7017	1503.04	FALSE	24
2022-09-14	12:56:56	1.6363	7.27859	10.7017	1536.66	FALSE	24
2022-09-14	12:56:57	1.32301	5.88501	4.43252	1508.92	FALSE	24
2022-09-14	12:56:57	1.08561	4.82901	4.43252	1541.49	FALSE	24
2022-09-14	12:56:57	0.859962	3.82528	4.43252	1512.75	FALSE	24
2022-09-14	12:56:57	0.717316	3.19077	4.43252	1544.68	FALSE	24
2022-09-14	12:56:58	0.479249	2.1318	-3.46122	1514.88	FALSE	24
2022-09-14	12:56:58	-1.06116	-4.72025	-3.46122	1544.68	FALSE	24
2022-09-14	12:56:58	-1.57047	-6.98576	-3.46122	1514.88	FALSE	24
2022-09-14	12:56:58	-0.960089	-4.27067	-3.46122	1544.68	FALSE	24
2022-09-14	12:56:59	-0.705127	-3.13655	-1.52523	1514.88	FALSE	24
2022-09-14	12:56:59	-0.991437	-4.41011	-1.52523	1544.68	FALSE	24
2022-09-14	12:56:59	0.667901	2.97096	-1.52523	1517.85	FALSE	24
2022-09-14	12:57:00	0.734466	3.26705	-0.0657589	1547.94	FALSE	24
2022-09-14	12:57:00	0.454517	2.02178	-0.0657589	1519.87	FALSE	24
2022-09-14	12:57:00	-0.597239	-2.65664	-0.0657589	1547.94	FALSE	24
2022-09-14	12:57:00	-0.650877	-2.89523	-0.0657589	1519.87	FALSE	24
2022-09-14	12:57:01	-0.72762	-3.2366	-1.30367	1547.94	FALSE	24
2022-09-14	12:57:01	-1.75342	-7.79956	-1.30367	1519.87	FALSE	24
2022-09-14	12:57:01	0.653295	2.90599	-1.30367	1550.85	FALSE	24
2022-09-14	12:57:01	0.655433	2.9155	-1.30367	1522.79	FALSE	24
2022-09-14	12:57:02	0.693499	3.08482	3.78657	1553.94	FALSE	24
2022-09-14	12:57:02	1.15375	5.13211	3.78657	1527.92	FALSE	24
2022-09-14	12:57:02	1.08714	4.83582	3.78657	1558.77	FALSE	24
2022-09-14	12:57:02	0.470649	2.09354	3.78657	1530.01	FALSE	24
2022-09-14	12:57:03	-0.496781	-2.20978	-2.38635	1558.77	FALSE	24
2022-09-14	12:57:03	-0.534694	-2.37843	-2.38635	1530.01	FALSE	24
2022-09-14	12:57:03	-0.577951	-2.57084	-2.38635	1558.77	FALSE	24
2022-09-14	12:57:04	-0.486043	-2.16202	-2.06581	1530.01	FALSE	24
2022-09-14	12:57:04	-0.572913	-2.54843	-2.06581	1558.77	FALSE	24
2022-09-14	12:57:04	-0.500394	-2.22585	-2.06581	1530.01	FALSE	24
2022-09-14	12:57:04	-0.298308	-1.32693	-2.06581	1558.77	FALSE	24
2022-09-14	12:57:05	-0.31159	-1.38601	4.68561	1530.01	FALSE	24
2022-09-14	12:57:05	1.04668	4.65584	4.68561	1563.43	FALSE	24
2022-09-14	12:57:05	1.44653	6.43445	4.68561	1536.45	FALSE	24
2022-09-14	12:57:05	2.03187	9.03816	4.68561	1572.47	FALSE	24
2022-09-14	12:57:06	0.917875	4.08289	3.40706	1540.53	FALSE	24
2022-09-14	12:57:06	0.707087	3.14526	3.40706	1575.61	FALSE	24
2022-09-14	12:57:06	0.727697	3.23694	3.40706	1543.77	FALSE	24
2022-09-14	12:57:06	0.711107	3.16315	3.40706	1578.77	FALSE	24
2022-09-14	12:57:07	0.689733	3.06807	3.08776	1546.84	FALSE	24
2022-09-14	12:57:07	0.692684	3.0812	3.08776	1581.85	FALSE	24
2022-09-14	12:57:07	0.700063	3.11402	3.08776	1549.95	FALSE	24
2022-09-14	12:57:08	0.63818	2.83875	2.58267	1584.69	FALSE	24
2022-09-14	12:57:08	0.585509	2.60446	2.58267	1552.56	FALSE	24
2022-09-14	12:57:08	0.554567	2.46682	2.58267	1587.16	FALSE	24
2022-09-14	12:57:08	0.544186	2.42065	2.58267	1554.98	FALSE	24
2022-09-14	12:57:09	0.516043	2.29546	2.60604	1589.46	FALSE	24
2022-09-14	12:57:09	0.594924	2.64634	2.60604	1557.62	FALSE	24
2022-09-14	12:57:09	0.658791	2.93043	2.60604	1592.39	FALSE	24
2022-09-14	12:57:09	0.573702	2.55194	2.60604	1560.17	FALSE	24
2022-09-14	12:57:10	0.660674	2.93881	2.34821	1595.33	FALSE	24
2022-09-14	12:57:10	0.472532	2.10192	2.34821	1562.28	FALSE	24
2022-09-14	12:57:10	0.54159	2.4091	2.34821	1597.73	FALSE	24
2022-09-14	12:57:10	0.436807	1.943	2.34821	1564.22	FALSE	24
2022-09-14	12:57:11	0.43701	1.94391	1.51063	1599.68	FALSE	24
2022-09-14	12:57:11	0.305713	1.35987	1.51063	1565.58	FALSE	24
2022-09-14	12:57:11	0.276094	1.22812	1.51063	1600.91	FALSE	24
2022-09-14	12:57:12	0.243066	1.08121	1.10056	1566.66	FALSE	24
2022-09-14	12:57:12	0.257672	1.14618	1.10056	1602.05	FALSE	24
2022-09-14	12:57:12	0.263473	1.17198	1.10056	1567.83	FALSE	24
2022-09-14	12:57:12	0.225458	1.00288	1.10056	1603.06	FALSE	24
2022-09-14	12:57:13	0.187595	0.83446	0.561797	1568.67	FALSE	24
2022-09-14	12:57:13	-0.0417682	-0.185793	0.561797	1603.06	FALSE	24
2022-09-14	12:57:13	-0.137595	-0.61205	0.561797	1568.67	FALSE	24
2022-09-14	12:57:13	0.496959	2.21057	0.561797	1605.27	FALSE	24
2022-09-14	12:57:14	0.773702	3.44158	2.55534	1572.11	FALSE	24
2022-09-14	12:57:14	0.424898	1.89003	2.55534	1607.16	FALSE	24
2022-09-14	12:57:14	0.690242	3.07033	2.55534	1575.18	FALSE	24
2022-09-14	12:57:14	0.409021	1.81941	2.55534	1608.98	FALSE	24
2022-09-14	12:57:15	0.693091	3.08301	2.77831	1578.26	FALSE	24
2022-09-14	12:57:15	0.520674	2.31606	2.77831	1611.29	FALSE	24
2022-09-14	12:57:15	0.660012	2.93587	2.77831	1581.2	FALSE	24
2022-09-14	12:57:16	0.470089	2.09105	2.5254	1613.38	FALSE	24
2022-09-14	12:57:16	0.619707	2.75658	2.5254	1583.95	FALSE	24
2022-09-14	12:57:16	0.634059	2.82042	2.5254	1616.2	FALSE	24
2022-09-14	12:57:16	0.547086	2.43355	2.5254	1586.39	FALSE	24
2022-09-14	12:57:17	0.54729	2.43446	2.35489	1618.64	FALSE	24
2022-09-14	12:57:17	0.495585	2.20446	2.35489	1588.59	FALSE	24
2022-09-14	12:57:17	0.612888	2.72625	2.35489	1621.36	FALSE	24
2022-09-14	12:57:17	0.461845	2.05438	2.35489	1590.65	FALSE	24
2022-09-14	12:57:18	0.605967	2.69546	2.49824	1624.06	FALSE	24
2022-09-14	12:57:18	0.50271	2.23615	2.49824	1592.88	FALSE	24
2022-09-14	12:57:18	0.534058	2.3756	2.49824	1626.43	FALSE	24
2022-09-14	12:57:18	0.603779	2.68573	2.49824	1595.57	FALSE	24

## Sheet: Ursula_star_202291412522 (3)
Date	Time	Lbs	Newtons	Total force x time		Total steps > 13.345	**GoPro Fitting: 1241
2022-09-14	12:52:18	0.312277	1.38907	1.38907	FALSE	0
2022-09-14	12:52:18	0.266832	1.18692	1.18692	FALSE	0
2022-09-14	12:52:18	0.132277	0.588395	1.97747	FALSE	0
2022-09-14	12:52:19	0.143117	0.636613	1.82354	FALSE	0
2022-09-14	12:52:19	0.0457636	0.203566	2.18103	FALSE	0
2022-09-14	12:52:19	0.20098	0.893999	2.71753	FALSE	0
2022-09-14	12:52:19	0.0371122	0.165082	2.34611	FALSE	0
2022-09-14	12:52:19	0.163473	0.727161	3.44469	FALSE	0
2022-09-14	12:52:20	0.0937025	0.416807	2.76292	FALSE	0
2022-09-14	12:52:20	0.216705	0.963947	4.40864	FALSE	0
2022-09-14	12:52:20	0.0989442	0.440124	3.20304	FALSE	0
2022-09-14	12:52:21	0.350089	1.55727	5.96591	FALSE	0
2022-09-14	12:52:21	0.199962	0.889471	4.09252	FALSE	0
2022-09-14	12:52:21	-0.0154069	-0.068533	5.96591	FALSE	0
2022-09-14	12:52:21	0.311667	1.38636	5.47887	FALSE	0
2022-09-14	12:52:22	0.598741	2.66332	8.62923	FALSE	0
2022-09-14	12:52:22	0.495127	2.20242	7.6813	FALSE	0
2022-09-14	12:52:22	0.959453	4.26784	12.8971	FALSE	0
2022-09-14	12:52:22	0.917163	4.07972	11.761	FALSE	0
2022-09-14	12:52:23	1.90525	8.47493	21.372	FALSE	0
2022-09-14	12:52:23	1.4164	6.30043	18.0615	FALSE	0
2022-09-14	12:52:23	0.394415	1.75444	23.1264	FALSE	0
2022-09-14	12:52:24	0.477977	2.12614	20.1876	FALSE	0
2022-09-14	12:52:24	0.385	1.71256	24.839	FALSE	0
2022-09-14	12:52:24	0.510598	2.27124	22.4588	FALSE	0
2022-09-14	12:52:24	0.467443	2.07928	26.9183	FALSE	0
2022-09-14	12:52:25	0.509122	2.26468	24.7235	FALSE	0
2022-09-14	12:52:25	0.529478	2.35522	29.2735	FALSE	0
2022-09-14	12:52:25	0.424338	1.88754	26.611	FALSE	0
2022-09-14	12:52:25	0.471667	2.09807	31.3716	FALSE	0
2022-09-14	12:52:26	0.394364	1.75421	28.3653	FALSE	0
2022-09-14	12:52:26	0.525509	2.33757	33.7091	FALSE	0
2022-09-14	12:52:26	0.393651	1.75104	30.1163	FALSE	0
2022-09-14	12:52:26	0.552074	2.45574	36.1649	FALSE	0
2022-09-14	12:52:27	0.468003	2.08177	32.1981	FALSE	0
2022-09-14	12:52:27	0.453601	2.01771	38.1826	FALSE	0
2022-09-14	12:52:27	0.419249	1.8649	34.063	FALSE	0
2022-09-14	12:52:28	0.292481	1.30101	39.4836	FALSE	0
2022-09-14	12:52:28	0.419453	1.86581	35.9288	FALSE	0
2022-09-14	12:52:28	0.339606	1.51064	40.9942	FALSE	0
2022-09-14	12:52:28	0.369631	1.64419	37.573	FALSE	0
2022-09-14	12:52:29	0.420827	1.87192	42.8662	FALSE	0
2022-09-14	12:52:29	0.379809	1.68947	39.2624	FALSE	0
2022-09-14	12:52:29	0.385	1.71256	44.5787	FALSE	0
2022-09-14	12:52:29	0.344186	1.53101	40.7934	FALSE	0
2022-09-14	12:52:30	0.434008	1.93055	46.5093	FALSE	0
2022-09-14	12:52:30	0.433092	1.92648	42.7199	FALSE	0
2022-09-14	12:52:30	0.200267	0.890828	47.4001	FALSE	0
2022-09-14	12:52:30	-0.134084	-0.596432	42.7199	FALSE	0
2022-09-14	12:52:31	0.296298	1.31799	48.7181	FALSE	0
2022-09-14	12:52:31	0.358028	1.59258	44.3125	FALSE	0
2022-09-14	12:52:31	0.713906	3.1756	51.8937	FALSE	0
2022-09-14	12:52:32	1.68434	7.49228	51.8048	FALSE	0
2022-09-14	12:52:32	2.49879	11.1151	63.0088	FALSE	0
2022-09-14	12:52:32	5.28031	23.4879	75.2927	1	1
2022-09-14	12:52:32	3.39686	15.1099	78.1187	1	2
2022-09-14	12:52:33	1.60373	7.13371	82.4264	FALSE	2
2022-09-14	12:52:33	3.61457	16.0783	94.197	1	3
2022-09-14	12:52:33	0.896807	3.98918	86.4156	FALSE	3
2022-09-14	12:52:33	2.21075	9.83386	104.031	FALSE	3
2022-09-14	12:52:34	3.98291	17.7168	104.132	1	4
2022-09-14	12:52:34	3.63731	16.1795	120.21	1	5
2022-09-14	12:52:34	5.80927	25.8408	129.973	1	6
2022-09-14	12:52:34	3.73396	16.6094	136.82	1	7
2022-09-14	12:52:35	1.08378	4.82087	134.794	FALSE	7
2022-09-14	12:52:35	0.719758	3.20163	140.021	FALSE	7
2022-09-14	12:52:35	2.69558	11.9905	146.784	FALSE	7
2022-09-14	12:52:36	4.84719	21.5613	161.583	1	8
2022-09-14	12:52:36	4.89762	21.7856	168.57	1	9
2022-09-14	12:52:36	3.02627	13.4615	175.044	1	10
2022-09-14	12:52:36	3.75645	16.7094	185.28	1	11
2022-09-14	12:52:37	0.503422	2.23932	177.283	FALSE	11
2022-09-14	12:52:37	0.721437	3.2091	188.489	FALSE	11
2022-09-14	12:52:37	0.715534	3.18284	180.466	FALSE	11
2022-09-14	12:52:37	0.715687	3.18352	191.672	FALSE	11
2022-09-14	12:52:38	0.717824	3.19302	183.659	FALSE	11
2022-09-14	12:52:38	0.721845	3.21091	194.883	FALSE	11
2022-09-14	12:52:38	0.731921	3.25573	186.915	FALSE	11
2022-09-14	12:52:38	0.717672	3.19235	198.075	FALSE	11
2022-09-14	12:52:39	0.720572	3.20525	190.12	FALSE	11
2022-09-14	12:52:39	0.724542	3.22291	201.298	FALSE	11
2022-09-14	12:52:39	0.723422	3.21793	193.338	FALSE	11
2022-09-14	12:52:40	7.15228	31.8148	233.113	1	12
2022-09-14	12:52:40	9.18932	40.8759	234.214	1	13
2022-09-14	12:52:40	9.44627	42.0189	275.132	1	14
2022-09-14	12:52:40	7.18546	31.9624	266.177	1	15
2022-09-14	12:52:41	1.83889	8.17975	283.312	FALSE	15
2022-09-14	12:52:41	4.84194	21.5379	287.714	1	16
2022-09-14	12:52:41	3.61487	16.0797	299.391	1	17
2022-09-14	12:52:41	5.11838	22.7676	310.482	1	18
2022-09-14	12:52:42	3.57416	15.8986	315.29	1	19
2022-09-14	12:52:42	1.11655	4.96664	315.449	FALSE	19
2022-09-14	12:52:42	0.521336	2.31901	317.609	FALSE	19
2022-09-14	12:52:43	0.50958	2.26671	317.715	FALSE	19
2022-09-14	12:52:43	0.416552	1.85291	319.462	FALSE	19
2022-09-14	12:52:43	0.456756	2.03174	319.747	FALSE	19
2022-09-14	12:52:43	0.721794	3.21068	322.673	FALSE	19
2022-09-14	12:52:44	-0.0598852	-0.266381	319.747	FALSE	19
2022-09-14	12:52:44	0.1193	0.53067	323.203	FALSE	19
2022-09-14	12:52:44	0.067901	0.302037	320.049	FALSE	19
2022-09-14	12:52:44	0.0703438	0.312903	323.516	FALSE	19
2022-09-14	12:52:45	0.0919213	0.408884	320.458	FALSE	19
2022-09-14	12:52:45	0.620013	2.75794	326.274	FALSE	19
2022-09-14	12:52:45	0.48556	2.15987	322.618	FALSE	19
2022-09-14	12:52:45	0.290649	1.29286	327.567	FALSE	19
2022-09-14	12:52:46	0.182812	0.813184	323.431	FALSE	19
2022-09-14	12:52:46	0.136298	0.606281	328.173	FALSE	19
2022-09-14	12:52:46	0.0902928	0.40164	323.833	FALSE	19
2022-09-14	12:52:47	0.120064	0.534069	328.707	FALSE	19
2022-09-14	12:52:47	-0.0536257	-0.238538	323.833	FALSE	19
2022-09-14	12:52:47	0.0309035	0.137465	328.845	FALSE	19
2022-09-14	12:52:47	-0.0946944	-0.42122	323.833	FALSE	19
2022-09-14	12:52:48	0.0338043	0.150368	328.995	FALSE	19
2022-09-14	12:52:48	-0.197035	-0.876451	323.833	FALSE	19
2022-09-14	12:52:48	-0.294643	-1.31063	328.995	FALSE	19
2022-09-14	12:52:48	-0.426145	-1.89558	323.833	FALSE	19
2022-09-14	12:52:49	-0.347977	-1.54787	328.995	FALSE	19
2022-09-14	12:52:49	-0.372557	-1.65721	323.833	FALSE	19
2022-09-14	12:52:49	-0.264771	-1.17775	328.995	FALSE	19
2022-09-14	12:52:49	-0.335763	-1.49354	323.833	FALSE	19
2022-09-14	12:52:50	-0.397595	-1.76858	328.995	FALSE	19
2022-09-14	12:52:50	-0.390267	-1.73599	323.833	FALSE	19
2022-09-14	12:52:50	-0.331743	-1.47566	328.995	FALSE	19
2022-09-14	12:52:51	-0.392404	-1.74549	323.833	FALSE	19
2022-09-14	12:52:51	-0.469554	-2.08867	328.995	FALSE	19
2022-09-14	12:52:51	-0.425076	-1.89082	323.833	FALSE	19
2022-09-14	12:52:51	-0.412557	-1.83514	328.995	FALSE	19
2022-09-14	12:52:52	-0.0772898	-0.3438	323.833	FALSE	19
2022-09-14	12:52:52	-0.293473	-1.30543	328.995	FALSE	19
2022-09-14	12:52:52	-0.138562	-0.616351	323.833	FALSE	19
2022-09-14	12:52:52	-0.139478	-0.620426	328.995	FALSE	19
2022-09-14	12:52:53	-0.088333	-0.392923	323.833	FALSE	19
2022-09-14	12:52:53	-0.190165	-0.845892	328.995	FALSE	19
2022-09-14	12:52:53	-0.104923	-0.466718	323.833	FALSE	19
2022-09-14	12:52:53	-0.17561	-0.781148	328.995	FALSE	19
2022-09-14	12:52:54	-0.123855	-0.550932	323.833	FALSE	19
2022-09-14	12:52:54	-0.286806	-1.27577	328.995	FALSE	19
2022-09-14	12:52:54	-0.216068	-0.961114	323.833	FALSE	19
2022-09-14	12:52:55	-0.283142	-1.25947	328.995	FALSE	19
2022-09-14	12:52:55	-0.230674	-1.02608	323.833	FALSE	19
2022-09-14	12:52:55	-0.338307	-1.50486	328.995	FALSE	19
2022-09-14	12:52:55	-0.187977	-0.836159	323.833	FALSE	19
2022-09-14	12:52:56	-0.177646	-0.790205	328.995	FALSE	19
2022-09-14	12:52:56	-0.224313	-0.997789	323.833	FALSE	19
2022-09-14	12:52:56	-0.368638	-1.63978	328.995	FALSE	19
2022-09-14	12:52:56	-0.310776	-1.38239	323.833	FALSE	19
2022-09-14	12:52:57	-0.449351	-1.9988	328.995	FALSE	19
2022-09-14	12:52:57	-0.452862	-2.01442	323.833	FALSE	19
2022-09-14	12:52:57	-0.466195	-2.07373	328.995	FALSE	19
2022-09-14	12:52:57	-0.370877	-1.64974	323.833	FALSE	19
2022-09-14	12:52:58	-0.665941	-2.96224	328.995	FALSE	19
2022-09-14	12:52:58	-0.6179	-2.74854	323.833	FALSE	19
2022-09-14	12:52:58	-0.660393	-2.93756	328.995	FALSE	19
2022-09-14	12:52:59	-0.417799	-1.85845	323.833	FALSE	19
2022-09-14	12:52:59	-0.478358	-2.12783	328.995	FALSE	19
2022-09-14	12:52:59	-0.310267	-1.38013	323.833	FALSE	19
2022-09-14	12:52:59	0.00963129	0.0428419	329.038	FALSE	19
2022-09-14	12:53:00	0.453397	2.0168	325.85	FALSE	19
2022-09-14	12:53:00	0.630394	2.80412	331.842	FALSE	19
2022-09-14	12:53:00	0.548155	2.4383	328.288	FALSE	19
2022-09-14	12:53:00	0.713651	3.17446	335.017	FALSE	19
2022-09-14	12:53:01	0.738486	3.28493	331.573	FALSE	19
2022-09-14	12:53:01	1.37482	6.11547	341.132	FALSE	19
2022-09-14	12:53:01	0.530751	2.36089	333.934	FALSE	19
2022-09-14	12:53:02	0.960522	4.27259	345.405	FALSE	19
2022-09-14	12:53:02	0.641896	2.85528	336.789	FALSE	19
2022-09-14	12:53:02	0.722049	3.21182	348.616	FALSE	19
2022-09-14	12:53:02	0.279962	1.24533	338.034	FALSE	19
2022-09-14	12:53:03	0.448461	1.99484	350.611	FALSE	19
2022-09-14	12:53:03	0.30444	1.35421	339.388	FALSE	19
2022-09-14	12:53:03	0.283473	1.26094	351.872	FALSE	19
2022-09-14	12:53:03	0.412023	1.83276	341.221	FALSE	19
2022-09-14	12:53:04	0.304389	1.35398	353.226	FALSE	19
2022-09-14	12:53:04	0.328206	1.45993	342.681	FALSE	19
2022-09-14	12:53:04	0.333957	1.48551	354.712	FALSE	19
2022-09-14	12:53:04	0.331819	1.476	344.157	FALSE	19
2022-09-14	12:53:05	0.320064	1.42371	356.135	FALSE	19
2022-09-14	12:53:05	0.320166	1.42416	345.581	FALSE	19
2022-09-14	12:53:05	0.316094	1.40605	357.541	FALSE	19
2022-09-14	12:53:06	0.302863	1.3472	346.929	FALSE	19
2022-09-14	12:53:06	0.289377	1.28721	358.829	FALSE	19
2022-09-14	12:53:06	0.286222	1.27317	348.202	FALSE	19
2022-09-14	12:53:06	0.285865	1.27158	360.1	FALSE	19
2022-09-14	12:53:07	0.299758	1.33338	349.535	FALSE	19
2022-09-14	12:53:07	0.326934	1.45427	361.555	FALSE	19
2022-09-14	12:53:07	0.316145	1.40628	350.941	FALSE	19
2022-09-14	12:53:07	0.526221	2.34074	363.895	FALSE	19
2022-09-14	12:53:08	0.71869	3.19688	354.138	FALSE	19
2022-09-14	12:53:08	0.71589	3.18442	367.08	FALSE	19
2022-09-14	12:53:08	0.72271	3.21476	357.353	FALSE	19
2022-09-14	12:53:08	0.724695	3.22359	370.303	FALSE	19
2022-09-14	12:53:09	0.717366	3.19099	360.544	FALSE	19
2022-09-14	12:53:09	0.725662	3.22789	373.531	FALSE	19
2022-09-14	12:53:09	0.731463	3.25369	363.798	FALSE	19
2022-09-14	12:53:10	0.721997	3.21159	376.743	FALSE	19
2022-09-14	12:53:10	0.723728	3.21929	367.017	FALSE	19
2022-09-14	12:53:10	0.716043	3.1851	379.928	FALSE	19
2022-09-14	12:53:10	0.722507	3.21386	370.231	FALSE	19
2022-09-14	12:53:11	0.723626	3.21883	383.147	FALSE	19
2022-09-14	12:53:11	0.727748	3.23717	373.468	FALSE	19
2022-09-14	12:53:11	0.719198	3.19914	386.346	FALSE	19
2022-09-14	12:53:11	0.630649	2.80525	376.273	FALSE	19
2022-09-14	12:53:12	0.322405	1.43412	387.78	FALSE	19
2022-09-14	12:53:12	0.316705	1.40877	377.682	FALSE	19
2022-09-14	12:53:12	0.32958	1.46604	389.246	FALSE	19
2022-09-14	12:53:12	0.713193	3.17243	380.854	FALSE	19
2022-09-14	12:53:13	0.717977	3.19371	392.44	FALSE	19
2022-09-14	12:53:13	0.717672	3.19235	384.047	FALSE	19
2022-09-14	12:53:13	0.715534	3.18284	395.623	FALSE	19
2022-09-14	12:53:14	0.719504	3.2005	387.247	FALSE	19
2022-09-14	12:53:14	0.722404	3.2134	398.836	FALSE	19
2022-09-14	12:53:14	0.718842	3.19755	390.445	FALSE	19
2022-09-14	12:53:14	0.720827	3.20638	402.042	FALSE	19
2022-09-14	12:53:15	0.721794	3.21068	393.655	FALSE	19
2022-09-14	12:53:15	0.714873	3.1799	405.222	FALSE	19
2022-09-14	12:53:15	0.719198	3.19914	396.855	FALSE	19
2022-09-14	12:53:15	0.720979	3.20706	408.429	FALSE	19
2022-09-14	12:53:16	0.720013	3.20276	400.057	FALSE	19
2022-09-14	12:53:16	0.722914	3.21567	411.645	FALSE	19
2022-09-14	12:53:16	0.722914	3.21567	403.273	FALSE	19
2022-09-14	12:53:16	0.726578	3.23196	414.877	FALSE	19
2022-09-14	12:53:17	0.723219	3.21702	406.49	FALSE	19
2022-09-14	12:53:17	0.716908	3.18895	418.066	FALSE	19
2022-09-14	12:53:17	0.719453	3.20027	409.69	FALSE	19
2022-09-14	12:53:18	0.719351	3.19982	421.266	FALSE	19
2022-09-14	12:53:18	0.72383	3.21974	412.91	FALSE	19
2022-09-14	12:53:18	0.719809	3.20185	424.468	FALSE	19
2022-09-14	12:53:18	0.719046	3.19846	416.109	FALSE	19
2022-09-14	12:53:19	0.724898	3.22449	427.692	FALSE	19
2022-09-14	12:53:19	0.712837	3.17084	419.279	FALSE	19
2022-09-14	12:53:19	0.725	3.22494	430.917	FALSE	19
2022-09-14	12:53:19	0.72327	3.21725	422.497	FALSE	19
2022-09-14	12:53:20	0.719962	3.20253	434.119	FALSE	19
2022-09-14	12:53:20	0.723626	3.21883	425.715	FALSE	19
2022-09-14	12:53:20	0.724237	3.22155	437.341	FALSE	19
2022-09-14	12:53:21	0.72383	3.21974	428.935	FALSE	19
2022-09-14	12:53:21	0.720369	3.20435	440.545	FALSE	19
2022-09-14	12:53:21	0.724949	3.22472	432.16	FALSE	19
2022-09-14	12:53:21	0.721997	3.21159	443.757	FALSE	19
2022-09-14	12:53:22	0.718944	3.19801	435.358	FALSE	19
2022-09-14	12:53:22	0.716501	3.18714	446.944	FALSE	19
2022-09-14	12:53:22	0.719809	3.20185	438.56	FALSE	19
2022-09-14	12:53:22	0.720776	3.20616	450.15	FALSE	19
2022-09-14	12:53:23	0.722761	3.21499	441.775	FALSE	19
2022-09-14	12:53:23	0.725611	3.22766	453.378	FALSE	19
2022-09-14	12:53:23	0.720114	3.20321	444.978	FALSE	19
2022-09-14	12:53:23	0.723626	3.21883	456.597	FALSE	19
2022-09-14	12:53:24	0.719402	3.20004	448.178	FALSE	19
2022-09-14	12:53:24	0.716298	3.18624	459.783	FALSE	19
2022-09-14	12:53:24	0.724288	3.22178	451.4	FALSE	19
2022-09-14	12:53:25	0.717977	3.19371	462.977	FALSE	19
2022-09-14	12:53:25	0.719504	3.2005	454.6	FALSE	19
2022-09-14	12:53:25	0.72042	3.20457	466.181	FALSE	19
2022-09-14	12:53:25	0.725305	3.2263	457.827	FALSE	19
2022-09-14	12:53:26	0.722303	3.21295	469.394	FALSE	19
2022-09-14	12:53:26	0.722303	3.21295	461.04	FALSE	19
2022-09-14	12:53:26	0.724847	3.22426	472.618	FALSE	19
2022-09-14	12:53:26	0.721437	3.2091	464.249	FALSE	19
2022-09-14	12:53:27	0.719351	3.19982	475.818	FALSE	19
2022-09-14	12:53:27	0.72897	3.2426	467.491	FALSE	19
2022-09-14	12:53:27	0.718791	3.19733	479.016	FALSE	19
2022-09-14	12:53:27	0.718791	3.19733	470.689	FALSE	19
2022-09-14	12:53:28	0.723066	3.21634	482.232	FALSE	19
2022-09-14	12:53:28	0.71986	3.20208	473.891	FALSE	19
2022-09-14	12:53:28	0.716654	3.18782	485.42	FALSE	19
2022-09-14	12:53:29	0.714109	3.1765	477.067	FALSE	19
2022-09-14	12:53:29	0.719707	3.2014	488.621	FALSE	19
2022-09-14	12:53:29	0.721591	3.20978	480.277	FALSE	19
2022-09-14	12:53:29	0.722354	3.21318	491.834	FALSE	19
2022-09-14	12:53:30	0.720064	3.20299	483.48	FALSE	19
2022-09-14	12:53:30	0.727036	3.234	495.068	FALSE	19
2022-09-14	12:53:30	0.721081	3.20751	486.687	FALSE	19
2022-09-14	12:53:30	0.719046	3.19846	498.267	FALSE	19
2022-09-14	12:53:31	0.721285	3.20842	489.896	FALSE	19
2022-09-14	12:53:31	0.717926	3.19348	501.46	FALSE	19
2022-09-14	12:53:31	0.720979	3.20706	493.103	FALSE	19
2022-09-14	12:53:31	0.722965	3.21589	504.676	FALSE	19
2022-09-14	12:53:32	0.720064	3.20299	496.306	FALSE	19
2022-09-14	12:53:32	0.72271	3.21476	507.891	FALSE	19
2022-09-14	12:53:32	0.72103	3.20729	499.513	FALSE	19
2022-09-14	12:53:33	0.723779	3.21951	511.11	FALSE	19
2022-09-14	12:53:33	0.717112	3.18986	502.703	FALSE	19
2022-09-14	12:53:33	0.723982	3.22042	514.331	FALSE	19
2022-09-14	12:53:33	0.721132	3.20774	505.911	FALSE	19
2022-09-14	12:53:34	0.719707	3.2014	517.532	FALSE	19
2022-09-14	12:53:34	0.717468	3.19144	509.102	FALSE	19
2022-09-14	12:53:34	0.716196	3.18578	520.718	FALSE	19
2022-09-14	12:53:34	0.721437	3.2091	512.311	FALSE	19
2022-09-14	12:53:35	0.713855	3.17537	523.893	FALSE	19
2022-09-14	12:53:35	0.718435	3.19574	515.507	FALSE	19
2022-09-14	12:53:35	0.726832	3.23309	527.127	FALSE	19
2022-09-14	12:53:36	0.719555	3.20072	518.708	FALSE	19
2022-09-14	12:53:36	0.715789	3.18397	530.311	FALSE	19
2022-09-14	12:53:36	0.71757	3.19189	521.9	FALSE	19
2022-09-14	12:53:36	0.722608	3.2143	533.525	FALSE	19
2022-09-14	12:53:37	0.720064	3.20299	525.103	FALSE	19
2022-09-14	12:53:37	0.71813	3.19439	536.719	FALSE	19
2022-09-14	12:53:37	0.725407	3.22676	528.329	FALSE	19
2022-09-14	12:53:38	0.719809	3.20185	539.921	FALSE	19
2022-09-14	12:53:38	0.720776	3.20616	531.536	FALSE	19
2022-09-14	12:53:38	0.715331	3.18194	543.103	FALSE	19
2022-09-14	12:53:38	0.724949	3.22472	534.76	FALSE	19
2022-09-14	12:53:38	0.722201	3.21249	546.315	FALSE	19
2022-09-14	12:53:39	0.718232	3.19484	537.955	FALSE	19
2022-09-14	12:53:39	0.720064	3.20299	549.518	FALSE	19
2022-09-14	12:53:39	0.72556	3.22744	541.183	FALSE	19
2022-09-14	12:53:40	0.723473	3.21815	552.737	FALSE	19
2022-09-14	12:53:40	0.720674	3.2057	544.388	FALSE	19
2022-09-14	12:53:40	0.717112	3.18986	555.926	FALSE	19
2022-09-14	12:53:40	0.726934	3.23355	547.622	FALSE	19
2022-09-14	12:53:41	0.732684	3.25912	559.186	FALSE	19
2022-09-14	12:53:41	0.729478	3.24486	550.867	FALSE	19
2022-09-14	12:53:41	0.717417	3.19121	562.377	FALSE	19
2022-09-14	12:53:41	0.722354	3.21318	554.08	FALSE	19
2022-09-14	12:53:42	0.719249	3.19936	565.576	FALSE	19
2022-09-14	12:53:42	0.72902	3.24283	557.323	FALSE	19
2022-09-14	12:53:42	0.722914	3.21567	568.792	FALSE	19
2022-09-14	12:53:42	0.728206	3.23921	560.562	FALSE	19
2022-09-14	12:53:43	0.718079	3.19416	571.986	FALSE	19
2022-09-14	12:53:43	0.722761	3.21499	563.777	FALSE	19
2022-09-14	12:53:43	0.717468	3.19144	575.177	FALSE	19
2022-09-14	12:53:44	0.721387	3.20887	566.986	FALSE	19
2022-09-14	12:53:44	0.722608	3.2143	578.392	FALSE	19
2022-09-14	12:53:44	0.71701	3.1894	570.175	FALSE	19
2022-09-14	12:53:44	0.724237	3.22155	581.613	FALSE	19
2022-09-14	12:53:45	0.72612	3.22993	573.405	FALSE	19
2022-09-14	12:53:45	0.726578	3.23196	584.845	FALSE	19
2022-09-14	12:53:45	0.721285	3.20842	576.614	FALSE	19
2022-09-14	12:53:45	0.729326	3.24419	588.089	FALSE	19
2022-09-14	12:53:46	0.730089	3.24758	579.861	FALSE	19
2022-09-14	12:53:46	0.720369	3.20435	591.294	FALSE	19
2022-09-14	12:53:46	0.72617	3.23015	583.091	FALSE	19
2022-09-14	12:53:46	0.723422	3.21793	594.512	FALSE	19
2022-09-14	12:53:47	0.723728	3.21929	586.311	FALSE	19
2022-09-14	12:53:47	0.720979	3.20706	597.719	FALSE	19
2022-09-14	12:53:47	0.719911	3.20231	589.513	FALSE	19
2022-09-14	12:53:48	0.727392	3.23559	600.954	FALSE	19
2022-09-14	12:53:48	0.715025	3.18057	592.693	FALSE	19
2022-09-14	12:53:48	0.721285	3.20842	604.163	FALSE	19
2022-09-14	12:53:48	0.720623	3.20548	595.899	FALSE	19
2022-09-14	12:53:49	0.718181	3.19461	607.357	FALSE	19
2022-09-14	12:53:49	0.720725	3.20593	599.105	FALSE	19
2022-09-14	12:53:49	0.715178	3.18125	610.539	FALSE	19
2022-09-14	12:53:49	0.718791	3.19733	602.302	FALSE	19
2022-09-14	12:53:50	0.726781	3.23287	613.772	FALSE	19
2022-09-14	12:53:50	0.723473	3.21815	605.52	FALSE	19
2022-09-14	12:53:50	0.720979	3.20706	616.979	FALSE	19
2022-09-14	12:53:50	0.724084	3.22087	608.741	FALSE	19
2022-09-14	12:53:51	0.724847	3.22426	620.203	FALSE	19
2022-09-14	12:53:51	0.726934	3.23355	611.975	FALSE	19
2022-09-14	12:53:51	0.725204	3.22585	623.429	FALSE	19
2022-09-14	12:53:52	0.724237	3.22155	615.196	FALSE	19
2022-09-14	12:53:52	0.718639	3.19665	626.625	FALSE	19
2022-09-14	12:53:52	0.720572	3.20525	618.402	FALSE	19
2022-09-14	12:53:52	0.721794	3.21068	629.836	FALSE	19
2022-09-14	12:53:53	0.724135	3.2211	621.623	FALSE	19
2022-09-14	12:53:53	0.725611	3.22766	633.064	FALSE	19
2022-09-14	12:53:53	0.720318	3.20412	624.827	FALSE	19
2022-09-14	12:53:53	0.723117	3.21657	636.28	FALSE	19
2022-09-14	12:53:54	0.721997	3.21159	628.038	FALSE	19
2022-09-14	12:53:54	0.714008	3.17605	639.456	FALSE	19
2022-09-14	12:53:54	0.717672	3.19235	631.231	FALSE	19
2022-09-14	12:53:55	0.732735	3.25935	642.716	FALSE	19
2022-09-14	12:53:55	0.722201	3.21249	634.443	FALSE	19
2022-09-14	12:53:55	0.721895	3.21113	645.927	FALSE	19
2022-09-14	12:53:55	0.721997	3.21159	637.655	FALSE	19
2022-09-14	12:53:56	0.723168	3.2168	649.144	FALSE	19
2022-09-14	12:53:56	0.715992	3.18488	640.84	FALSE	19
2022-09-14	12:53:56	0.721183	3.20797	652.352	FALSE	19
2022-09-14	12:53:56	0.73243	3.258	644.098	FALSE	19
2022-09-14	12:53:57	0.721845	3.21091	655.562	FALSE	19
2022-09-14	12:53:57	0.719097	3.19869	647.296	FALSE	19
2022-09-14	12:53:57	0.727494	3.23604	658.799	FALSE	19
2022-09-14	12:53:57	0.728766	3.2417	650.538	FALSE	19
2022-09-14	12:53:58	0.719911	3.20231	662.001	FALSE	19
2022-09-14	12:53:58	0.70902	3.15386	653.692	FALSE	19
2022-09-14	12:53:58	0.713041	3.17175	665.173	FALSE	19
2022-09-14	12:53:59	0.725662	3.22789	656.92	FALSE	19
2022-09-14	12:53:59	0.719351	3.19982	668.372	FALSE	19
2022-09-14	12:53:59	0.723015	3.21612	660.136	FALSE	19
2022-09-14	12:53:59	0.724288	3.22178	671.594	FALSE	19
2022-09-14	12:54:00	0.725051	3.22517	663.361	FALSE	19
2022-09-14	12:54:00	0.721336	3.20865	674.803	FALSE	19
2022-09-14	12:54:00	0.722099	3.21204	666.573	FALSE	19
2022-09-14	12:54:00	0.721539	3.20955	678.012	FALSE	19
2022-09-14	12:54:01	0.720216	3.20366	669.777	FALSE	19
2022-09-14	12:54:01	0.724084	3.22087	681.233	FALSE	19
2022-09-14	12:54:01	0.716857	3.18872	672.965	FALSE	19
2022-09-14	12:54:01	0.719962	3.20253	684.436	FALSE	19
2022-09-14	12:54:02	0.72327	3.21725	676.183	FALSE	19
2022-09-14	12:54:02	0.719707	3.2014	687.637	FALSE	19
2022-09-14	12:54:02	0.716959	3.18918	679.372	FALSE	19
2022-09-14	12:54:03	0.720878	3.20661	690.844	FALSE	19
2022-09-14	12:54:03	0.721488	3.20932	682.581	FALSE	19
2022-09-14	12:54:03	0.724796	3.22404	694.068	FALSE	19
2022-09-14	12:54:03	0.725204	3.22585	685.807	FALSE	19
2022-09-14	12:54:04	0.718893	3.19778	697.266	FALSE	19
2022-09-14	12:54:04	0.725865	3.22879	689.036	FALSE	19
2022-09-14	12:54:04	0.724389	3.22223	700.488	FALSE	19
2022-09-14	12:54:04	0.724746	3.22382	692.26	FALSE	19
2022-09-14	12:54:05	0.7193	3.19959	703.687	FALSE	19
2022-09-14	12:54:05	0.720013	3.20276	695.462	FALSE	19
2022-09-14	12:54:05	0.722049	3.21182	706.899	FALSE	19
2022-09-14	12:54:05	0.714924	3.18012	698.643	FALSE	19
2022-09-14	12:54:06	0.720572	3.20525	710.104	FALSE	19
2022-09-14	12:54:06	0.724796	3.22404	701.867	FALSE	19
2022-09-14	12:54:06	0.712837	3.17084	713.275	FALSE	19
2022-09-14	12:54:07	0.723066	3.21634	705.083	FALSE	19
2022-09-14	12:54:07	0.718028	3.19393	716.469	FALSE	19
2022-09-14	12:54:07	0.716908	3.18895	708.272	FALSE	19
2022-09-14	12:54:07	0.723982	3.22042	719.69	FALSE	19
2022-09-14	12:54:08	0.722354	3.21318	711.485	FALSE	19
2022-09-14	12:54:08	0.721183	3.20797	722.898	FALSE	19
2022-09-14	12:54:08	0.720572	3.20525	714.69	FALSE	19
2022-09-14	12:54:08	0.721997	3.21159	726.109	FALSE	19
2022-09-14	12:54:09	0.725153	3.22563	717.916	FALSE	19
2022-09-14	12:54:09	0.721845	3.21091	729.32	FALSE	19
2022-09-14	12:54:09	0.724288	3.22178	721.138	FALSE	19
2022-09-14	12:54:09	0.711718	3.16586	732.486	FALSE	19
2022-09-14	12:54:10	0.727188	3.23468	724.372	FALSE	19
2022-09-14	12:54:10	0.714109	3.1765	735.663	FALSE	19
2022-09-14	12:54:10	0.722608	3.2143	727.587	FALSE	19
2022-09-14	12:54:11	0.715382	3.18216	738.845	FALSE	19
2022-09-14	12:54:11	0.725	3.22494	730.812	FALSE	19
2022-09-14	12:54:11	0.721946	3.21136	742.056	FALSE	19
2022-09-14	12:54:11	0.720318	3.20412	734.016	FALSE	19
2022-09-14	12:54:12	0.722049	3.21182	745.268	FALSE	19
2022-09-14	12:54:12	0.721692	3.21023	737.226	FALSE	19
2022-09-14	12:54:12	0.720267	3.20389	748.472	FALSE	19
2022-09-14	12:54:12	0.72215	3.21227	740.438	FALSE	19
2022-09-14	12:54:13	0.727748	3.23717	751.709	FALSE	19
2022-09-14	12:54:13	0.724186	3.22132	743.66	FALSE	19
2022-09-14	12:54:13	0.723117	3.21657	754.925	FALSE	19
2022-09-14	12:54:14	0.720929	3.20684	746.866	FALSE	19
2022-09-14	12:54:14	0.722354	3.21318	758.139	FALSE	19
2022-09-14	12:54:14	0.727646	3.23671	750.103	FALSE	19
2022-09-14	12:54:14	0.723524	3.21838	761.357	FALSE	19
2022-09-14	12:54:15	0.718028	3.19393	753.297	FALSE	19
2022-09-14	12:54:15	0.724491	3.22268	764.58	FALSE	19
2022-09-14	12:54:15	0.719046	3.19846	756.496	FALSE	19
2022-09-14	12:54:15	0.724796	3.22404	767.804	FALSE	19
2022-09-14	12:54:16	0.72103	3.20729	759.703	FALSE	19
2022-09-14	12:54:16	0.723321	3.21748	771.021	FALSE	19
2022-09-14	12:54:16	0.720725	3.20593	762.909	FALSE	19
2022-09-14	12:54:16	0.72042	3.20457	774.226	FALSE	19
2022-09-14	12:54:17	0.725814	3.22857	766.137	FALSE	19
2022-09-14	12:54:17	0.725458	3.22698	777.453	FALSE	19
2022-09-14	12:54:17	0.719148	3.19891	769.336	FALSE	19
2022-09-14	12:54:18	0.722761	3.21499	780.668	FALSE	19
2022-09-14	12:54:18	0.722862	3.21543	772.552	FALSE	19
2022-09-14	12:54:18	0.719707	3.2014	783.869	FALSE	19
2022-09-14	12:54:18	0.724135	3.2211	775.773	FALSE	19
2022-09-14	12:54:19	0.718588	3.19642	787.066	FALSE	19
2022-09-14	12:54:19	0.719962	3.20253	778.975	FALSE	19
2022-09-14	12:54:19	0.716399	3.18669	790.252	FALSE	19
2022-09-14	12:54:19	0.723015	3.21612	782.191	FALSE	19
2022-09-14	12:54:20	0.719148	3.19891	793.451	FALSE	19
2022-09-14	12:54:20	0.722557	3.21408	785.406	FALSE	19
2022-09-14	12:54:20	0.723372	3.2177	796.669	FALSE	19
2022-09-14	12:54:20	0.724135	3.2211	788.627	FALSE	19
2022-09-14	12:54:21	0.723626	3.21883	799.888	FALSE	19
2022-09-14	12:54:21	0.727443	3.23581	791.862	FALSE	19
2022-09-14	12:54:21	0.715687	3.18352	803.071	FALSE	19
2022-09-14	12:54:22	0.721946	3.21136	795.074	FALSE	19
2022-09-14	12:54:22	0.723015	3.21612	806.287	FALSE	19
2022-09-14	12:54:22	0.714924	3.18012	798.254	FALSE	19
2022-09-14	12:54:22	0.722404	3.2134	809.501	FALSE	19
2022-09-14	12:54:23	0.723066	3.21634	801.47	FALSE	19
2022-09-14	12:54:23	0.720929	3.20684	812.708	FALSE	19
2022-09-14	12:54:23	0.721845	3.21091	804.681	FALSE	19
2022-09-14	12:54:23	0.720929	3.20684	815.914	FALSE	19
2022-09-14	12:54:24	0.718842	3.19755	807.879	FALSE	19
2022-09-14	12:54:24	0.722049	3.21182	819.126	FALSE	19
2022-09-14	12:54:24	0.727341	3.23536	811.114	FALSE	19
2022-09-14	12:54:24	0.719758	3.20163	822.328	FALSE	19
2022-09-14	12:54:25	0.725662	3.22789	814.342	FALSE	19
2022-09-14	12:54:25	0.719453	3.20027	825.528	FALSE	19
2022-09-14	12:54:25	0.561845	2.4992	816.841	FALSE	19
2022-09-14	12:54:26	0.632328	2.81272	828.341	FALSE	19
2022-09-14	12:54:26	0.718639	3.19665	820.038	FALSE	19
2022-09-14	12:54:26	0.726883	3.23332	831.574	FALSE	19
2022-09-14	12:54:26	0.725204	3.22585	823.264	FALSE	19
2022-09-14	12:54:27	0.836145	3.71934	835.294	FALSE	19
2022-09-14	12:54:27	1.12902	5.02211	828.286	FALSE	19
2022-09-14	12:54:27	0.7193	3.19959	838.493	FALSE	19
2022-09-14	12:54:27	0.718384	3.19552	831.481	FALSE	19
2022-09-14	12:54:28	0.73187	3.2555	841.749	FALSE	19
2022-09-14	12:54:28	0.727596	3.23649	834.718	FALSE	19
2022-09-14	12:54:28	0.723779	3.21951	844.968	FALSE	19
2022-09-14	12:54:28	0.726578	3.23196	837.95	FALSE	19
2022-09-14	12:54:29	0.724338	3.222	848.19	FALSE	19
2022-09-14	12:54:29	0.719351	3.19982	841.15	FALSE	19
2022-09-14	12:54:29	0.722761	3.21499	851.405	FALSE	19
2022-09-14	12:54:30	0.716247	3.18601	844.336	FALSE	19
2022-09-14	12:54:30	0.725254	3.22607	854.631	FALSE	19
2022-09-14	12:54:30	0.718232	3.19484	847.53	FALSE	19
2022-09-14	12:54:30	0.724135	3.2211	857.852	FALSE	19
2022-09-14	12:54:31	0.72388	3.21996	850.75	FALSE	19
2022-09-14	12:54:31	0.720216	3.20366	861.056	FALSE	19
2022-09-14	12:54:31	0.716908	3.18895	853.939	FALSE	19
2022-09-14	12:54:31	0.722965	3.21589	864.272	FALSE	19
2022-09-14	12:54:32	0.721997	3.21159	857.151	FALSE	19
2022-09-14	12:54:32	0.724389	3.22223	867.494	FALSE	19
2022-09-14	12:54:32	0.727646	3.23671	860.388	FALSE	19
2022-09-14	12:54:32	0.718486	3.19597	870.69	FALSE	19
2022-09-14	12:54:33	0.721997	3.21159	863.599	FALSE	19
2022-09-14	12:54:33	0.726221	3.23038	873.92	FALSE	19
2022-09-14	12:54:33	0.724491	3.22268	866.822	FALSE	19
2022-09-14	12:54:34	0.721845	3.21091	877.131	FALSE	19
2022-09-14	12:54:34	0.722354	3.21318	870.035	FALSE	19
2022-09-14	12:54:34	0.732532	3.25845	880.39	FALSE	19
2022-09-14	12:54:34	0.728919	3.24238	873.277	FALSE	19
2022-09-14	12:54:35	0.729936	3.2469	883.637	FALSE	19
2022-09-14	12:54:35	0.724644	3.22336	876.501	FALSE	19
2022-09-14	12:54:35	0.72327	3.21725	886.854	FALSE	19
2022-09-14	12:54:35	0.722812	3.21521	879.716	FALSE	19
2022-09-14	12:54:36	0.723626	3.21883	890.073	FALSE	19
2022-09-14	12:54:36	0.725611	3.22766	882.944	FALSE	19
2022-09-14	12:54:36	0.719911	3.20231	893.275	FALSE	19
2022-09-14	12:54:37	0.716043	3.1851	886.129	FALSE	19
2022-09-14	12:54:37	0.72612	3.22993	896.505	FALSE	19
2022-09-14	12:54:37	0.730751	3.25053	889.379	FALSE	19
2022-09-14	12:54:37	0.726883	3.23332	899.738	FALSE	19
2022-09-14	12:54:38	0.717316	3.19077	892.57	FALSE	19
2022-09-14	12:54:38	0.730445	3.24917	902.987	FALSE	19
2022-09-14	12:54:38	0.728308	3.23966	895.81	FALSE	19
2022-09-14	12:54:38	0.718995	3.19823	906.186	FALSE	19
2022-09-14	12:54:39	0.733092	3.26094	899.071	FALSE	19
2022-09-14	12:54:39	0.730496	3.24939	909.435	FALSE	19
2022-09-14	12:54:39	0.728817	3.24192	902.313	FALSE	19
2022-09-14	12:54:39	0.727697	3.23694	912.672	FALSE	19
2022-09-14	12:54:40	0.721336	3.20865	905.521	FALSE	19
2022-09-14	12:54:40	0.724898	3.22449	915.897	FALSE	19
2022-09-14	12:54:40	0.721895	3.21113	908.732	FALSE	19
2022-09-14	12:54:41	0.71243	3.16903	919.066	FALSE	19
2022-09-14	12:54:41	0.719148	3.19891	911.931	FALSE	19
2022-09-14	12:54:41	0.719198	3.19914	922.265	FALSE	19
2022-09-14	12:54:41	0.716196	3.18578	915.117	FALSE	19
2022-09-14	12:54:42	0.723372	3.2177	925.482	FALSE	19
2022-09-14	12:54:42	0.730089	3.24758	918.365	FALSE	19
2022-09-14	12:54:42	0.715789	3.18397	928.666	FALSE	19
2022-09-14	12:54:42	0.724033	3.22064	921.585	FALSE	19
2022-09-14	12:54:43	0.71472	3.17922	931.846	FALSE	19
2022-09-14	12:54:43	0.723066	3.21634	924.802	FALSE	19
2022-09-14	12:54:43	0.726985	3.23377	935.079	FALSE	19
2022-09-14	12:54:43	0.726832	3.23309	928.035	FALSE	19
2022-09-14	12:54:44	0.72556	3.22744	938.307	FALSE	19
2022-09-14	12:54:44	0.718079	3.19416	931.229	FALSE	19
2022-09-14	12:54:44	0.729529	3.24509	941.552	FALSE	19
2022-09-14	12:54:45	0.720827	3.20638	934.435	FALSE	19
2022-09-14	12:54:45	0.721692	3.21023	944.762	FALSE	19
2022-09-14	12:54:45	0.726578	3.23196	937.667	FALSE	19
2022-09-14	12:54:45	0.723626	3.21883	947.981	FALSE	19
2022-09-14	12:54:46	0.720623	3.20548	940.873	FALSE	19
2022-09-14	12:54:46	0.484186	2.15376	950.135	FALSE	19
2022-09-14	12:54:46	0.731667	3.2546	944.127	FALSE	19
2022-09-14	12:54:46	0.727392	3.23559	953.37	FALSE	19
2022-09-14	12:54:47	0.720827	3.20638	947.334	FALSE	19
2022-09-14	12:54:47	0.728664	3.24124	956.612	FALSE	19
2022-09-14	12:54:47	0.725051	3.22517	950.559	FALSE	19
2022-09-14	12:54:47	0.72897	3.2426	959.854	FALSE	19
2022-09-14	12:54:48	0.727494	3.23604	953.795	FALSE	19
2022-09-14	12:54:48	0.724237	3.22155	963.076	FALSE	19
2022-09-14	12:54:48	0.726629	3.23219	957.027	FALSE	19
2022-09-14	12:54:49	0.727392	3.23559	966.311	FALSE	19
2022-09-14	12:54:49	0.717366	3.19099	960.218	FALSE	19
2022-09-14	12:54:49	0.723066	3.21634	969.528	FALSE	19
2022-09-14	12:54:49	0.72388	3.21996	963.438	FALSE	19
2022-09-14	12:54:50	0.717468	3.19144	972.719	FALSE	19
2022-09-14	12:54:50	0.726578	3.23196	966.67	FALSE	19
2022-09-14	12:54:50	0.719402	3.20004	975.919	FALSE	19
2022-09-14	12:54:50	0.722404	3.2134	969.883	FALSE	19
2022-09-14	12:54:51	0.728461	3.24034	979.159	FALSE	19
2022-09-14	12:54:51	0.731616	3.25437	973.138	FALSE	19
2022-09-14	12:54:51	0.723575	3.21861	982.378	FALSE	19
2022-09-14	12:54:51	0.721743	3.21046	976.348	FALSE	19
2022-09-14	12:54:52	0.727545	3.23627	985.614	FALSE	19
2022-09-14	12:54:52	0.723066	3.21634	979.565	FALSE	19
2022-09-14	12:54:52	0.717824	3.19302	988.807	FALSE	19
2022-09-14	12:54:53	0.724288	3.22178	982.786	FALSE	19
2022-09-14	12:54:53	0.724949	3.22472	992.032	FALSE	19
2022-09-14	12:54:53	0.720878	3.20661	985.993	FALSE	19
2022-09-14	12:54:53	0.723015	3.21612	995.248	FALSE	19
2022-09-14	12:54:54	0.726832	3.23309	989.226	FALSE	19
2022-09-14	12:54:54	0.718893	3.19778	998.446	FALSE	19
2022-09-14	12:54:54	0.720572	3.20525	992.431	FALSE	19
2022-09-14	12:54:54	0.720725	3.20593	1001.65	FALSE	19
2022-09-14	12:54:55	0.72444	3.22245	995.654	FALSE	19
2022-09-14	12:54:55	0.728104	3.23875	1004.89	FALSE	19
2022-09-14	12:54:55	0.729886	3.24668	998.9	FALSE	19
2022-09-14	12:54:56	0.730801	3.25075	1008.14	FALSE	19
2022-09-14	12:54:56	0.725865	3.22879	1002.13	FALSE	19
2022-09-14	12:54:56	0.723982	3.22042	1011.36	FALSE	19
2022-09-14	12:54:56	0.722914	3.21567	1005.34	FALSE	19
2022-09-14	12:54:57	0.724491	3.22268	1014.58	FALSE	19
2022-09-14	12:54:57	0.725763	3.22834	1008.57	FALSE	19
2022-09-14	12:54:57	0.724542	3.22291	1017.81	FALSE	19
2022-09-14	12:54:57	0.724949	3.22472	1011.8	FALSE	19
2022-09-14	12:54:58	0.729173	3.24351	1021.05	FALSE	19
2022-09-14	12:54:58	0.721285	3.20842	1015.01	FALSE	19
2022-09-14	12:54:58	0.722404	3.2134	1024.26	FALSE	19
2022-09-14	12:54:58	0.726832	3.23309	1018.24	FALSE	19
2022-09-14	12:54:59	0.722914	3.21567	1027.48	FALSE	19
2022-09-14	12:54:59	0.717112	3.18986	1021.43	FALSE	19
2022-09-14	12:54:59	0.725967	3.22925	1030.71	FALSE	19
2022-09-14	12:55:00	0.725458	3.22698	1024.66	FALSE	19
2022-09-14	12:55:00	0.733244	3.26162	1033.97	FALSE	19
2022-09-14	12:55:00	0.721997	3.21159	1027.87	FALSE	19
2022-09-14	12:55:00	0.525102	2.33576	1036.31	FALSE	19
2022-09-14	12:55:01	0.156654	0.696828	1028.56	FALSE	19
2022-09-14	12:55:01	0.386323	1.71844	1038.03	FALSE	19
2022-09-14	12:55:01	0.562557	2.50237	1031.07	FALSE	19
2022-09-14	12:55:01	0.262761	1.16881	1039.19	FALSE	19
2022-09-14	12:55:02	0.251463	1.11856	1032.19	FALSE	19
2022-09-14	12:55:02	0.240776	1.07102	1040.26	FALSE	19
2022-09-14	12:55:02	0.717774	3.1928	1035.38	FALSE	19
2022-09-14	12:55:02	0.71874	3.1971	1043.46	FALSE	19
2022-09-14	12:55:03	0.721234	3.20819	1038.59	FALSE	19
2022-09-14	12:55:03	0.72327	3.21725	1046.68	FALSE	19
2022-09-14	12:55:03	0.724288	3.22178	1041.81	FALSE	19
2022-09-14	12:55:04	0.539249	2.39869	1049.08	FALSE	19
2022-09-14	12:55:04	0.731565	3.25415	1045.06	FALSE	19
2022-09-14	12:55:04	0.735941	3.27361	1052.35	FALSE	19
2022-09-14	12:55:04	0.723422	3.21793	1048.28	FALSE	19
2022-09-14	12:55:05	0.723473	3.21815	1055.57	FALSE	19
2022-09-14	12:55:05	0.728868	3.24215	1051.52	FALSE	19
2022-09-14	12:55:05	0.724746	3.22382	1058.79	FALSE	19
2022-09-14	12:55:05	0.717672	3.19235	1054.72	FALSE	19
2022-09-14	12:55:06	0.722507	3.21386	1062.01	FALSE	19
2022-09-14	12:55:06	0.724491	3.22268	1057.94	FALSE	19
2022-09-14	12:55:06	0.718232	3.19484	1065.2	FALSE	19
2022-09-14	12:55:06	0.720776	3.20616	1061.14	FALSE	19
2022-09-14	12:55:07	0.726934	3.23355	1068.44	FALSE	19
2022-09-14	12:55:07	0.719758	3.20163	1064.35	FALSE	19
2022-09-14	12:55:07	0.726221	3.23038	1071.67	FALSE	19
2022-09-14	12:55:08	0.728766	3.2417	1067.59	FALSE	19
2022-09-14	12:55:08	0.724949	3.22472	1074.89	FALSE	19
2022-09-14	12:55:08	0.727239	3.2349	1070.82	FALSE	19
2022-09-14	12:55:08	0.72617	3.23015	1078.12	FALSE	19
2022-09-14	12:55:09	0.716552	3.18737	1074.01	FALSE	19
2022-09-14	12:55:09	0.723524	3.21838	1081.34	FALSE	19
2022-09-14	12:55:09	0.722252	3.21272	1077.22	FALSE	19
2022-09-14	12:55:09	0.718282	3.19506	1084.53	FALSE	19
2022-09-14	12:55:10	0.725662	3.22789	1080.45	FALSE	19
2022-09-14	12:55:10	0.723219	3.21702	1087.75	FALSE	19
2022-09-14	12:55:10	0.723677	3.21906	1083.67	FALSE	19
2022-09-14	12:55:10	0.72215	3.21227	1090.96	FALSE	19
2022-09-14	12:55:11	0.732786	3.25958	1086.93	FALSE	19
2022-09-14	12:55:11	0.725509	3.22721	1094.19	FALSE	19
2022-09-14	12:55:11	0.724491	3.22268	1090.15	FALSE	19
2022-09-14	12:55:12	0.724847	3.22426	1097.42	FALSE	19
2022-09-14	12:55:12	0.727494	3.23604	1093.39	FALSE	19
2022-09-14	12:55:12	0.726425	3.23128	1100.65	FALSE	19
2022-09-14	12:55:12	0.72958	3.24532	1096.63	FALSE	19
2022-09-14	12:55:13	0.729886	3.24668	1103.89	FALSE	19
2022-09-14	12:55:13	0.73187	3.2555	1099.89	FALSE	19
2022-09-14	12:55:13	0.721234	3.20819	1107.1	FALSE	19
2022-09-14	12:55:13	0.728461	3.24034	1103.13	FALSE	19
2022-09-14	12:55:14	0.724898	3.22449	1110.33	FALSE	19
2022-09-14	12:55:14	0.72729	3.23513	1106.36	FALSE	19
2022-09-14	12:55:14	0.723066	3.21634	1113.54	FALSE	19
2022-09-14	12:55:14	0.723066	3.21634	1109.58	FALSE	19
2022-09-14	12:55:15	0.72958	3.24532	1116.79	FALSE	19
2022-09-14	12:55:15	0.72785	3.23762	1112.82	FALSE	19
2022-09-14	12:55:15	0.727952	3.23808	1120.03	FALSE	19
2022-09-14	12:55:16	0.721591	3.20978	1116.03	FALSE	19
2022-09-14	12:55:16	0.725254	3.22607	1123.25	FALSE	19
2022-09-14	12:55:16	0.729936	3.2469	1119.27	FALSE	19
2022-09-14	12:55:16	0.725407	3.22676	1126.48	FALSE	19
2022-09-14	12:55:17	0.723473	3.21815	1122.49	FALSE	19
2022-09-14	12:55:17	1.53676	6.83582	1133.31	FALSE	19
2022-09-14	12:55:17	0.726272	3.2306	1125.72	FALSE	19
2022-09-14	12:55:17	0.726832	3.23309	1136.55	FALSE	19
2022-09-14	12:55:18	0.725153	3.22563	1128.95	FALSE	19
2022-09-14	12:55:18	0.730343	3.24871	1139.8	FALSE	19
2022-09-14	12:55:18	0.728817	3.24192	1132.19	FALSE	19
2022-09-14	12:55:19	0.726323	3.23083	1143.03	FALSE	19
2022-09-14	12:55:19	0.722914	3.21567	1135.41	FALSE	19
2022-09-14	12:55:19	0.732634	3.2589	1146.29	FALSE	19
2022-09-14	12:55:19	0.722965	3.21589	1138.62	FALSE	19
2022-09-14	12:55:20	0.728562	3.24079	1149.53	FALSE	19
2022-09-14	12:55:20	0.719656	3.20117	1141.82	FALSE	19
2022-09-14	12:55:20	0.727392	3.23559	1152.76	FALSE	19
2022-09-14	12:55:20	0.728868	3.24215	1145.07	FALSE	19
2022-09-14	12:55:21	3.03579	13.5038	1166.27	1	20
2022-09-14	12:55:21	0.725204	3.22585	1148.29	FALSE	20
2022-09-14	12:55:21	0.727239	3.2349	1169.5	FALSE	20
2022-09-14	12:55:21	0.713906	3.1756	1151.47	FALSE	20
2022-09-14	12:55:22	0.70388	3.131	1172.63	FALSE	20
2022-09-14	12:55:22	0.580623	2.58273	1154.05	FALSE	20
2022-09-14	12:55:22	0.899351	4.00049	1176.63	FALSE	20
2022-09-14	12:55:23	0.893702	3.97537	1158.03	FALSE	20
2022-09-14	12:55:23	-0.0145926	-0.0649108	1176.63	FALSE	20
2022-09-14	12:55:23	-0.377035	-1.67713	1158.03	FALSE	20
2022-09-14	12:55:23	-0.526959	-2.34402	1176.63	FALSE	20
2022-09-14	12:55:24	-0.602226	-2.67882	1158.03	FALSE	20
2022-09-14	12:55:24	-0.740699	-3.29478	1176.63	FALSE	20
2022-09-14	12:55:24	-0.773269	-3.43966	1158.03	FALSE	20
2022-09-14	12:55:24	-0.871183	-3.8752	1176.63	FALSE	20
2022-09-14	12:55:25	-0.92421	-4.11107	1158.03	FALSE	20
2022-09-14	12:55:25	-1.07271	-4.77163	1176.63	FALSE	20
2022-09-14	12:55:25	-1.17027	-5.2056	1158.03	FALSE	20
2022-09-14	12:55:25	-1.22416	-5.44531	1176.63	FALSE	20
2022-09-14	12:55:26	-1.30294	-5.79574	1158.03	FALSE	20
2022-09-14	12:55:26	-1.3921	-6.19234	1176.63	FALSE	20
2022-09-14	12:55:26	-1.62172	-7.21373	1158.03	FALSE	20
2022-09-14	12:55:27	-1.49347	-6.64325	1176.63	FALSE	20
2022-09-14	12:55:27	-1.38915	-6.17922	1158.03	FALSE	20
2022-09-14	12:55:27	-0.480139	-2.13575	1176.63	FALSE	20
2022-09-14	12:55:27	1.69813	7.55362	1165.58	FALSE	20
2022-09-14	12:55:28	2.19604	9.76843	1186.4	FALSE	20
2022-09-14	12:55:28	0.414771	1.84498	1167.42	FALSE	20
2022-09-14	12:55:28	1.36006	6.04982	1192.45	FALSE	20
2022-09-14	12:55:28	-0.00273512	-0.0121664	1167.42	FALSE	20
2022-09-14	12:55:29	-0.273575	-1.21692	1192.45	FALSE	20
2022-09-14	12:55:29	-0.262175	-1.16621	1167.42	FALSE	20
2022-09-14	12:55:29	0.405	1.80152	1194.25	FALSE	20
2022-09-14	12:55:29	-0.381921	-1.69886	1167.42	FALSE	20
2022-09-14	12:55:30	-0.887518	-3.94786	1194.25	FALSE	20
2022-09-14	12:55:30	-0.750267	-3.33734	1167.42	FALSE	20
2022-09-14	12:55:30	-0.481005	-2.13961	1194.25	FALSE	20
2022-09-14	12:55:31	0.181489	0.807299	1168.23	FALSE	20
2022-09-14	12:55:31	0.232888	1.03593	1195.29	FALSE	20
2022-09-14	12:55:31	-0.333931	-1.48539	1168.23	FALSE	20
2022-09-14	12:55:31	-0.53103	-2.36213	1195.29	FALSE	20
2022-09-14	12:55:32	-0.418918	-1.86343	1168.23	FALSE	20
2022-09-14	12:55:32	-0.453524	-2.01737	1195.29	FALSE	20
2022-09-14	12:55:32	-0.254949	-1.13406	1168.23	FALSE	20
2022-09-14	12:55:32	-0.19276	-0.857435	1195.29	FALSE	20
2022-09-14	12:55:33	-0.245229	-1.09083	1168.23	FALSE	20
2022-09-14	12:55:33	-0.156119	-0.694449	1195.29	FALSE	20
2022-09-14	12:55:33	-0.0377987	-0.168136	1168.23	FALSE	20
2022-09-14	12:55:33	-0.0227351	-0.10113	1195.29	FALSE	20
2022-09-14	12:55:34	-0.0406995	-0.18104	1168.23	FALSE	20
2022-09-14	12:55:34	0.000470984	0.00209503	1195.29	FALSE	20
2022-09-14	12:55:34	-0.318307	-1.41589	1168.23	FALSE	20
2022-09-14	12:55:35	-1.03179	-4.58961	1195.29	FALSE	20
2022-09-14	12:55:35	-1.21805	-5.41813	1168.23	FALSE	20
2022-09-14	12:55:35	-1.24635	-5.54401	1195.29	FALSE	20
2022-09-14	12:55:35	-1.27815	-5.68547	1168.23	FALSE	20
2022-09-14	12:55:36	-1.34925	-6.00173	1195.29	FALSE	20
2022-09-14	12:55:36	-1.4094	-6.26929	1168.23	FALSE	20
2022-09-14	12:55:36	-1.23139	-5.47747	1195.29	FALSE	20
2022-09-14	12:55:36	-1.38884	-6.17784	1168.23	FALSE	20
2022-09-14	12:55:37	-1.50553	-6.6969	1195.29	FALSE	20
2022-09-14	12:55:37	-1.6263	-7.23411	1168.23	FALSE	20
2022-09-14	12:55:37	-1.54803	-6.88595	1195.29	FALSE	20
2022-09-14	12:55:37	-1.80258	-8.01824	1168.23	FALSE	20
2022-09-14	12:55:38	-2.43617	-10.8366	1195.29	FALSE	20
2022-09-14	12:55:38	-2.05276	-9.13109	1168.23	FALSE	20
2022-09-14	12:55:38	-1.85327	-8.24372	1195.29	FALSE	20
2022-09-14	12:55:39	-1.08757	-4.83773	1168.23	FALSE	20
2022-09-14	12:55:39	-0.403142	-1.79326	1195.29	FALSE	20
2022-09-14	12:55:39	-1.11826	-4.97424	1168.23	FALSE	20
2022-09-14	12:55:39	-0.818205	-3.63954	1195.29	FALSE	20
2022-09-14	12:55:40	-1.19515	-5.31627	1168.23	FALSE	20
2022-09-14	12:55:40	-1.53393	-6.82323	1195.29	FALSE	20
2022-09-14	12:55:40	-1.59882	-7.11187	1168.23	FALSE	20
2022-09-14	12:55:40	-1.18655	-5.27801	1195.29	FALSE	20
2022-09-14	12:55:41	-1.36487	-6.07121	1168.23	FALSE	20
2022-09-14	12:55:41	-1.58732	-7.06072	1195.29	FALSE	20
2022-09-14	12:55:41	-1.38859	-6.17673	1168.23	FALSE	20
2022-09-14	12:55:41	-1.55683	-6.92509	1195.29	FALSE	20
2022-09-14	12:55:42	-1.49113	-6.63284	1168.23	FALSE	20
2022-09-14	12:55:42	-0.450979	-2.00604	1195.29	FALSE	20
2022-09-14	12:55:42	-0.249351	-1.10916	1168.23	FALSE	20
2022-09-14	12:55:43	-0.384363	-1.70972	1195.29	FALSE	20
2022-09-14	12:55:43	-0.316933	-1.40978	1168.23	FALSE	20
2022-09-14	12:55:43	-0.373575	-1.66174	1195.29	FALSE	20
2022-09-14	12:55:43	-0.373473	-1.66128	1168.23	FALSE	20
2022-09-14	12:55:44	-0.648027	-2.88255	1195.29	FALSE	20
2022-09-14	12:55:44	-0.780292	-3.47089	1168.23	FALSE	20
2022-09-14	12:55:44	-0.794999	-3.53631	1195.29	FALSE	20
2022-09-14	12:55:44	-0.882328	-3.92477	1168.23	FALSE	20
2022-09-14	12:55:45	-0.847417	-3.76948	1195.29	FALSE	20
2022-09-14	12:55:45	-0.832658	-3.70383	1168.23	FALSE	20
2022-09-14	12:55:45	-0.658765	-2.93032	1195.29	FALSE	20
2022-09-14	12:55:46	-0.515712	-2.29399	1168.23	FALSE	20
2022-09-14	12:55:46	-0.433066	-1.92636	1195.29	FALSE	20
2022-09-14	12:55:46	-0.398206	-1.7713	1168.23	FALSE	20
2022-09-14	12:55:46	-0.399681	-1.77786	1195.29	FALSE	20
2022-09-14	12:55:47	-0.183346	-0.81556	1168.23	FALSE	20
2022-09-14	12:55:47	-0.192964	-0.858342	1195.29	FALSE	20
2022-09-14	12:55:47	-0.245076	-1.09015	1168.23	FALSE	20
2022-09-14	12:55:47	-0.0278242	-0.123768	1195.29	FALSE	20
2022-09-14	12:55:48	-0.185178	-0.823709	1168.23	FALSE	20
2022-09-14	12:55:48	-0.122888	-0.54663	1195.29	FALSE	20
2022-09-14	12:55:48	-0.135305	-0.601864	1168.23	FALSE	20
2022-09-14	12:55:48	-0.0956613	-0.425521	1195.29	FALSE	20
2022-09-14	12:55:49	-0.0794272	-0.353308	1168.23	FALSE	20
2022-09-14	12:55:49	-0.0850761	-0.378436	1195.29	FALSE	20
2022-09-14	12:55:49	-0.0973915	-0.433217	1168.23	FALSE	20
2022-09-14	12:55:50	-0.104872	-0.466492	1195.29	FALSE	20
2022-09-14	12:55:50	0.106832	0.47521	1168.71	FALSE	20
2022-09-14	12:55:50	-0.000597729	-0.00265882	1195.29	FALSE	20
2022-09-14	12:55:50	0.280165	1.24623	1169.95	FALSE	20
2022-09-14	12:55:51	0.199504	0.887434	1196.18	FALSE	20
2022-09-14	12:55:51	0.325763	1.44906	1171.4	FALSE	20
2022-09-14	12:55:51	0.266985	1.1876	1197.37	FALSE	20
2022-09-14	12:55:51	0.282812	1.258	1172.66	FALSE	20
2022-09-14	12:55:52	0.260776	1.15998	1198.53	FALSE	20
2022-09-14	12:55:52	0.244389	1.08709	1173.75	FALSE	20
2022-09-14	12:55:52	0.366425	1.62993	1200.16	FALSE	20
2022-09-14	12:55:52	0.258791	1.15115	1174.9	FALSE	20
2022-09-14	12:55:53	0.356349	1.58511	1201.74	FALSE	20
2022-09-14	12:55:53	0.351463	1.56338	1176.46	FALSE	20
2022-09-14	12:55:53	0.27299	1.21431	1202.95	FALSE	20
2022-09-14	12:55:54	0.354669	1.57764	1178.04	FALSE	20
2022-09-14	12:55:54	0.376807	1.67611	1204.63	FALSE	20
2022-09-14	12:55:54	0.529733	2.35636	1180.4	FALSE	20
2022-09-14	12:55:54	0.533957	2.37515	1207.01	FALSE	20
2022-09-14	12:55:55	0.47528	2.11414	1182.51	FALSE	20
2022-09-14	12:55:55	0.439198	1.95364	1208.96	FALSE	20
2022-09-14	12:55:55	0.407443	1.81239	1184.32	FALSE	20
2022-09-14	12:55:55	0.420522	1.87057	1210.83	FALSE	20
2022-09-14	12:55:56	0.479555	2.13316	1186.45	FALSE	20
2022-09-14	12:55:56	0.476043	2.11753	1212.95	FALSE	20
2022-09-14	12:55:56	0.36098	1.60571	1188.06	FALSE	20
2022-09-14	12:55:56	0.381845	1.69852	1214.65	FALSE	20
2022-09-14	12:55:57	0.373397	1.66094	1189.72	FALSE	20
2022-09-14	12:55:57	0.309631	1.3773	1216.02	FALSE	20
2022-09-14	12:55:57	0.315992	1.4056	1191.13	FALSE	20
2022-09-14	12:55:58	0.22388	0.995863	1217.02	FALSE	20
2022-09-14	12:55:58	0.285967	1.27204	1192.4	FALSE	20
2022-09-14	12:55:58	0.604898	2.69071	1219.71	FALSE	20
2022-09-14	12:55:58	0.391412	1.74108	1194.14	FALSE	20
2022-09-14	12:55:59	0.482964	2.14832	1221.86	FALSE	20
2022-09-14	12:55:59	0.365051	1.62382	1195.76	FALSE	20
2022-09-14	12:55:59	0.409529	1.82167	1223.68	FALSE	20
2022-09-14	12:55:59	0.469529	2.08856	1197.85	FALSE	20
2022-09-14	12:56:00	0.418435	1.86128	1225.54	FALSE	20
2022-09-14	12:56:00	0.473499	2.10622	1199.96	FALSE	20
2022-09-14	12:56:00	0.448512	1.99507	1227.54	FALSE	20
2022-09-14	12:56:00	0.381285	1.69603	1201.65	FALSE	20
2022-09-14	12:56:01	0.37411	1.66412	1229.2	FALSE	20
2022-09-14	12:56:01	0.43701	1.94391	1203.6	FALSE	20
2022-09-14	12:56:01	0.303372	1.34946	1230.55	FALSE	20
2022-09-14	12:56:02	0.384898	1.7121	1205.31	FALSE	20
2022-09-14	12:56:02	0.426221	1.89592	1232.45	FALSE	20
2022-09-14	12:56:02	0.39355	1.75059	1207.06	FALSE	20
2022-09-14	12:56:02	0.515789	2.29433	1234.74	FALSE	20
2022-09-14	12:56:03	0.544745	2.42313	1209.48	FALSE	20
2022-09-14	12:56:03	0.545763	2.42766	1237.17	FALSE	20
2022-09-14	12:56:03	0.458181	2.03808	1211.52	FALSE	20
2022-09-14	12:56:03	0.505102	2.24679	1239.41	FALSE	20
2022-09-14	12:56:04	0.295738	1.3155	1212.84	FALSE	20
2022-09-14	12:56:04	0.31701	1.41012	1240.82	FALSE	20
2022-09-14	12:56:04	0.421743	1.876	1214.71	FALSE	20
2022-09-14	12:56:04	0.500216	2.22506	1243.05	FALSE	20
2022-09-14	12:56:05	0.511005	2.27305	1216.99	FALSE	20
2022-09-14	12:56:05	0.775687	3.45041	1246.5	FALSE	20
2022-09-14	12:56:05	0.834822	3.71346	1220.7	FALSE	20
2022-09-14	12:56:06	0.747341	3.32432	1249.82	FALSE	20
2022-09-14	12:56:06	0.569275	2.53225	1223.23	FALSE	20
2022-09-14	12:56:06	0.506934	2.25494	1252.08	FALSE	20
2022-09-14	12:56:06	0.519606	2.31131	1225.54	FALSE	20
2022-09-14	12:56:07	0.537265	2.38986	1254.47	FALSE	20
2022-09-14	12:56:07	0.637163	2.83423	1228.38	FALSE	20
2022-09-14	12:56:07	0.945763	4.20694	1258.68	FALSE	20
2022-09-14	12:56:07	1.27375	5.66589	1234.04	FALSE	20
2022-09-14	12:56:08	1.30719	5.81464	1264.49	FALSE	20
2022-09-14	12:56:08	1.1508	5.11899	1239.16	FALSE	20
2022-09-14	12:56:08	1.18307	5.26253	1269.75	FALSE	20
2022-09-14	12:56:08	1.00073	4.45145	1243.61	FALSE	20
2022-09-14	12:56:09	0.86958	3.86807	1273.62	FALSE	20
2022-09-14	12:56:09	0.800623	3.56133	1247.18	FALSE	20
2022-09-14	12:56:09	0.812379	3.61362	1277.24	FALSE	20
2022-09-14	12:56:10	0.867341	3.85811	1251.03	FALSE	20
2022-09-14	12:56:10	0.857265	3.81329	1281.05	FALSE	20
2022-09-14	12:56:10	0.923117	4.10621	1255.14	FALSE	20
2022-09-14	12:56:10	0.910751	4.0512	1285.1	FALSE	20
2022-09-14	12:56:11	0.858639	3.8194	1258.96	FALSE	20
2022-09-14	12:56:11	0.885254	3.93779	1289.04	FALSE	20
2022-09-14	12:56:11	0.739249	3.28833	1262.25	FALSE	20
2022-09-14	12:56:11	0.702252	3.12376	1292.16	FALSE	20
2022-09-14	12:56:12	0.830598	3.69467	1265.94	FALSE	20
2022-09-14	12:56:12	0.651361	2.89738	1295.06	FALSE	20
2022-09-14	12:56:12	0.630191	2.80322	1268.75	FALSE	20
2022-09-14	12:56:12	0.638791	2.84147	1297.9	FALSE	20
2022-09-14	12:56:13	0.721895	3.21113	1271.96	FALSE	20
2022-09-14	12:56:13	0.657265	2.92365	1300.82	FALSE	20
2022-09-14	12:56:13	0.560318	2.49241	1274.45	FALSE	20
2022-09-14	12:56:14	0.540165	2.40276	1303.23	FALSE	20
2022-09-14	12:56:14	0.518944	2.30837	1276.76	FALSE	20
2022-09-14	12:56:14	0.573702	2.55194	1305.78	FALSE	20
2022-09-14	12:56:14	0.601285	2.67464	1279.43	FALSE	20
2022-09-14	12:56:15	0.643524	2.86252	1308.64	FALSE	20
2022-09-14	12:56:15	0.63986	2.84623	1282.28	FALSE	20
2022-09-14	12:56:15	0.646425	2.87543	1311.52	FALSE	20
2022-09-14	12:56:15	0.675687	3.00559	1285.28	FALSE	20
2022-09-14	12:56:16	0.642914	2.85981	1314.38	FALSE	20
2022-09-14	12:56:16	0.596399	2.6529	1287.94	FALSE	20
2022-09-14	12:56:16	0.534364	2.37696	1316.75	FALSE	20
2022-09-14	12:56:17	0.488104	2.17118	1290.11	FALSE	20
2022-09-14	12:56:17	0.502659	2.23593	1318.99	FALSE	20
2022-09-14	12:56:17	0.473804	2.10757	1292.22	FALSE	20
2022-09-14	12:56:17	0.505509	2.24861	1321.24	FALSE	20
2022-09-14	12:56:18	0.513092	2.28234	1294.5	FALSE	20
2022-09-14	12:56:18	0.502303	2.23434	1323.47	FALSE	20
2022-09-14	12:56:18	0.485051	2.1576	1296.66	FALSE	20
2022-09-14	12:56:18	0.523982	2.33078	1325.8	FALSE	20
2022-09-14	12:56:19	0.584084	2.59812	1299.25	FALSE	20
2022-09-14	12:56:19	0.581845	2.58816	1328.39	FALSE	20
2022-09-14	12:56:19	0.574415	2.55511	1301.81	FALSE	20
2022-09-14	12:56:19	0.617316	2.74595	1331.14	FALSE	20
2022-09-14	12:56:20	0.660216	2.93677	1304.75	FALSE	20
2022-09-14	12:56:20	0.672685	2.99224	1334.13	FALSE	20
2022-09-14	12:56:20	0.686425	3.05336	1307.8	FALSE	20
2022-09-14	12:56:21	0.696654	3.09886	1337.23	FALSE	20
2022-09-14	12:56:21	0.858689	3.81962	1311.62	FALSE	20
2022-09-14	12:56:21	1.10536	4.91686	1342.14	FALSE	20
2022-09-14	12:56:21	1.02668	4.56688	1316.19	FALSE	20
2022-09-14	12:56:22	1.05024	4.67168	1346.82	FALSE	20
2022-09-14	12:56:22	0.884033	3.93236	1320.12	FALSE	20
2022-09-14	12:56:22	0.985458	4.38351	1351.2	FALSE	20
2022-09-14	12:56:22	0.960776	4.27372	1324.39	FALSE	20
2022-09-14	12:56:23	0.959657	4.26875	1355.47	FALSE	20
2022-09-14	12:56:23	0.980114	4.35974	1328.75	FALSE	20
2022-09-14	12:56:23	1.13823	5.06307	1360.53	FALSE	20
2022-09-14	12:56:23	1.15955	5.15791	1333.91	FALSE	20
2022-09-14	12:56:24	1.22658	5.45607	1365.99	FALSE	20
2022-09-14	12:56:24	1.31767	5.86126	1339.77	FALSE	20
2022-09-14	12:56:24	1.04892	4.66581	1370.65	FALSE	20
2022-09-14	12:56:25	0.975229	4.33801	1344.11	FALSE	20
2022-09-14	12:56:25	0.984186	4.37786	1375.03	FALSE	20
2022-09-14	12:56:25	1.02047	4.53925	1348.65	FALSE	20
2022-09-14	12:56:25	1.07497	4.78168	1379.81	FALSE	20
2022-09-14	12:56:26	1.17497	5.2265	1353.87	FALSE	20
2022-09-14	12:56:26	1.11599	4.96415	1384.78	FALSE	20
2022-09-14	12:56:26	0.791311	3.51991	1357.39	FALSE	20
2022-09-14	12:56:26	0.434669	1.93349	1386.71	FALSE	20
2022-09-14	12:56:27	-0.968892	-4.30983	1357.39	FALSE	20
2022-09-14	12:56:27	-1.23128	-5.47698	1386.71	FALSE	20
2022-09-14	12:56:27	-1.38558	-6.16334	1357.39	FALSE	20
2022-09-14	12:56:27	-1.50314	-6.68627	1386.71	FALSE	20
2022-09-14	12:56:28	-1.56961	-6.98194	1357.39	FALSE	20
2022-09-14	12:56:28	-1.60731	-7.14964	1386.71	FALSE	20
2022-09-14	12:56:28	-1.65703	-7.3708	1357.39	FALSE	20
2022-09-14	12:56:29	-1.70192	-7.57048	1386.71	FALSE	20
2022-09-14	12:56:29	-1.87312	-8.33201	1357.39	FALSE	20
2022-09-14	12:56:29	-1.93668	-8.61474	1386.71	FALSE	20
2022-09-14	12:56:29	-2.00548	-8.92078	1357.39	FALSE	20
2022-09-14	12:56:30	-2.05805	-9.15462	1386.71	FALSE	20
2022-09-14	12:56:30	-2.07225	-9.21778	1357.39	FALSE	20
2022-09-14	12:56:30	-2.18533	-9.72078	1386.71	FALSE	20
2022-09-14	12:56:30	-2.29805	-10.2222	1357.39	FALSE	20
2022-09-14	12:56:31	-2.55902	-11.383	1386.71	FALSE	20
2022-09-14	12:56:31	-2.65357	-11.8036	1357.39	FALSE	20
2022-09-14	12:56:31	-2.92645	-13.0174	1386.71	FALSE	20
2022-09-14	12:56:31	-2.92736	-13.0215	1357.39	FALSE	20
2022-09-14	12:56:32	-3.15576	-14.0375	1386.71	FALSE	20
2022-09-14	12:56:32	-3.21159	-14.2858	1357.39	FALSE	20
2022-09-14	12:56:32	-3.52228	-15.6678	1386.71	FALSE	20
2022-09-14	12:56:33	-3.55978	-15.8346	1357.39	FALSE	20
2022-09-14	12:56:33	-3.46462	-15.4113	1386.71	FALSE	20
2022-09-14	12:56:33	-3.37515	-15.0133	1357.39	FALSE	20
2022-09-14	12:56:33	-3.33953	-14.8549	1386.71	FALSE	20
2022-09-14	12:56:34	-2.40085	-10.6795	1357.39	FALSE	20
2022-09-14	12:56:34	0.72785	3.23762	1389.95	FALSE	20
2022-09-14	12:56:34	0.725305	3.2263	1360.62	FALSE	20
2022-09-14	12:56:34	0.72841	3.24011	1393.19	FALSE	20
2022-09-14	12:56:35	0.727188	3.23468	1363.86	FALSE	20
2022-09-14	12:56:35	0.727239	3.2349	1396.42	FALSE	20
2022-09-14	12:56:35	0.72271	3.21476	1367.07	FALSE	20
2022-09-14	12:56:35	0.723422	3.21793	1399.64	FALSE	20
2022-09-14	12:56:36	0.729377	3.24441	1370.31	FALSE	20
2022-09-14	12:56:36	0.719198	3.19914	1402.84	FALSE	20
2022-09-14	12:56:36	0.720521	3.20502	1373.52	FALSE	20
2022-09-14	12:56:37	0.707952	3.14911	1405.99	FALSE	20
2022-09-14	12:56:37	0.710293	3.15953	1376.68	FALSE	20
2022-09-14	12:56:37	0.705814	3.1396	1409.13	FALSE	20
2022-09-14	12:56:37	0.704288	3.13281	1379.81	FALSE	20
2022-09-14	12:56:38	-0.348129	-1.54855	1409.13	FALSE	20
2022-09-14	12:56:38	-1.68823	-7.50958	1379.81	FALSE	20
2022-09-14	12:56:38	-1.65134	-7.34549	1409.13	FALSE	20
2022-09-14	12:56:38	-1.49785	-6.66274	1379.81	FALSE	20
2022-09-14	12:56:39	0.325102	1.44612	1410.58	FALSE	20
2022-09-14	12:56:39	0.517519	2.30203	1382.11	FALSE	20
2022-09-14	12:56:39	0.461743	2.05393	1412.63	FALSE	20
2022-09-14	12:56:39	0.501132	2.22914	1384.34	FALSE	20
2022-09-14	12:56:40	0.386272	1.71822	1414.35	FALSE	20
2022-09-14	12:56:40	0.402252	1.7893	1386.13	FALSE	20
2022-09-14	12:56:40	0.43584	1.9387	1416.29	FALSE	20
2022-09-14	12:56:41	0.413651	1.84	1387.97	FALSE	20
2022-09-14	12:56:41	0.366018	1.62812	1417.91	FALSE	20
2022-09-14	12:56:41	0.424338	1.88754	1389.86	FALSE	20
2022-09-14	12:56:41	0.412735	1.83593	1419.75	FALSE	20
2022-09-14	12:56:42	0.390903	1.73881	1391.6	FALSE	20
2022-09-14	12:56:42	0.466629	2.07566	1421.83	FALSE	20
2022-09-14	12:56:42	0.463982	2.06388	1393.66	FALSE	20
2022-09-14	12:56:42	0.523168	2.32716	1424.15	FALSE	20
2022-09-14	12:56:43	0.497367	2.21239	1395.88	FALSE	20
2022-09-14	12:56:43	0.508155	2.26038	1426.41	FALSE	20
2022-09-14	12:56:43	0.456603	2.03106	1397.91	FALSE	20
2022-09-14	12:56:43	0.392023	1.7438	1428.16	FALSE	20
2022-09-14	12:56:44	0.364644	1.62201	1399.53	FALSE	20
2022-09-14	12:56:44	0.35472	1.57787	1429.74	FALSE	20
2022-09-14	12:56:44	0.41757	1.85743	1401.39	FALSE	20
2022-09-14	12:56:45	0.466069	2.07317	1431.81	FALSE	20
2022-09-14	12:56:45	0.408461	1.81692	1403.2	FALSE	20
2022-09-14	12:56:45	0.368461	1.63899	1433.45	FALSE	20
2022-09-14	12:56:45	0.365814	1.62721	1404.83	FALSE	20
2022-09-14	12:56:46	0.378537	1.68381	1435.13	FALSE	20
2022-09-14	12:56:46	0.461998	2.05506	1406.88	FALSE	20
2022-09-14	12:56:46	0.330089	1.4683	1436.6	FALSE	20
2022-09-14	12:56:46	0.458384	2.03898	1408.92	FALSE	20
2022-09-14	12:56:47	0.499758	2.22302	1438.82	FALSE	20
2022-09-14	12:56:47	0.582761	2.59224	1411.52	FALSE	20
2022-09-14	12:56:47	0.610496	2.71561	1441.54	FALSE	20
2022-09-14	12:56:47	0.601081	2.67373	1414.19	FALSE	20
2022-09-14	12:56:48	0.514262	2.28754	1443.83	FALSE	20
2022-09-14	12:56:48	0.481183	2.1404	1416.33	FALSE	20
2022-09-14	12:56:48	0.493804	2.19654	1446.02	FALSE	20
2022-09-14	12:56:49	0.442456	1.96813	1418.3	FALSE	20
2022-09-14	12:56:49	0.465356	2.07	1448.09	FALSE	20
2022-09-14	12:56:49	0.375026	1.66819	1419.97	FALSE	20
2022-09-14	12:56:49	0.41757	1.85743	1449.95	FALSE	20
2022-09-14	12:56:50	0.429886	1.91222	1421.88	FALSE	20
2022-09-14	12:56:50	0.401641	1.78658	1451.74	FALSE	20
2022-09-14	12:56:50	0.441336	1.96315	1423.84	FALSE	20
2022-09-14	12:56:50	0.434568	1.93305	1453.67	FALSE	20
2022-09-14	12:56:51	0.533804	2.37447	1426.22	FALSE	20
2022-09-14	12:56:51	0.614822	2.73485	1456.4	FALSE	20
2022-09-14	12:56:51	0.569479	2.53316	1428.75	FALSE	20
2022-09-14	12:56:51	0.516043	2.29546	1458.7	FALSE	20
2022-09-14	12:56:52	0.582303	2.5902	1431.34	FALSE	20
2022-09-14	12:56:52	0.443524	1.97288	1460.67	FALSE	20
2022-09-14	12:56:52	0.476349	2.1189	1433.46	FALSE	20
2022-09-14	12:56:53	0.520471	2.31516	1462.99	FALSE	20
2022-09-14	12:56:53	0.510038	2.26875	1435.73	FALSE	20
2022-09-14	12:56:53	0.915534	4.07248	1467.06	FALSE	20
2022-09-14	12:56:53	1.60128	7.12281	1442.85	FALSE	20
2022-09-14	12:56:54	2.8993	12.8967	1479.96	FALSE	20
2022-09-14	12:56:54	3.73375	16.6085	1459.46	1	21
2022-09-14	12:56:54	3.50327	15.5832	1495.54	1	22
2022-09-14	12:56:54	2.4109	10.7242	1470.18	FALSE	22
2022-09-14	12:56:55	1.96933	8.75997	1504.3	FALSE	22
2022-09-14	12:56:55	1.91299	8.50936	1478.69	FALSE	22
2022-09-14	12:56:55	3.12434	13.8977	1518.2	1	23
2022-09-14	12:56:56	3.18088	14.1492	1492.84	1	24
2022-09-14	12:56:56	2.51375	11.1817	1529.38	FALSE	24
2022-09-14	12:56:56	2.29248	10.1974	1503.04	FALSE	24
2022-09-14	12:56:56	1.6363	7.27859	1536.66	FALSE	24
2022-09-14	12:56:57	1.32301	5.88501	1508.92	FALSE	24
2022-09-14	12:56:57	1.08561	4.82901	1541.49	FALSE	24
2022-09-14	12:56:57	0.859962	3.82528	1512.75	FALSE	24
2022-09-14	12:56:57	0.717316	3.19077	1544.68	FALSE	24
2022-09-14	12:56:58	0.479249	2.1318	1514.88	FALSE	24
2022-09-14	12:56:58	-1.06116	-4.72025	1544.68	FALSE	24
2022-09-14	12:56:58	-1.57047	-6.98576	1514.88	FALSE	24
2022-09-14	12:56:58	-0.960089	-4.27067	1544.68	FALSE	24
2022-09-14	12:56:59	-0.705127	-3.13655	1514.88	FALSE	24
2022-09-14	12:56:59	-0.991437	-4.41011	1544.68	FALSE	24
2022-09-14	12:56:59	0.667901	2.97096	1517.85	FALSE	24
2022-09-14	12:57:00	0.734466	3.26705	1547.94	FALSE	24
2022-09-14	12:57:00	0.454517	2.02178	1519.87	FALSE	24
2022-09-14	12:57:00	-0.597239	-2.65664	1547.94	FALSE	24
2022-09-14	12:57:00	-0.650877	-2.89523	1519.87	FALSE	24
2022-09-14	12:57:01	-0.72762	-3.2366	1547.94	FALSE	24
2022-09-14	12:57:01	-1.75342	-7.79956	1519.87	FALSE	24
2022-09-14	12:57:01	0.653295	2.90599	1550.85	FALSE	24
2022-09-14	12:57:01	0.655433	2.9155	1522.79	FALSE	24
2022-09-14	12:57:02	0.693499	3.08482	1553.94	FALSE	24
2022-09-14	12:57:02	1.15375	5.13211	1527.92	FALSE	24
2022-09-14	12:57:02	1.08714	4.83582	1558.77	FALSE	24
2022-09-14	12:57:02	0.470649	2.09354	1530.01	FALSE	24
2022-09-14	12:57:03	-0.496781	-2.20978	1558.77	FALSE	24
2022-09-14	12:57:03	-0.534694	-2.37843	1530.01	FALSE	24
2022-09-14	12:57:03	-0.577951	-2.57084	1558.77	FALSE	24
2022-09-14	12:57:04	-0.486043	-2.16202	1530.01	FALSE	24
2022-09-14	12:57:04	-0.572913	-2.54843	1558.77	FALSE	24
2022-09-14	12:57:04	-0.500394	-2.22585	1530.01	FALSE	24
2022-09-14	12:57:04	-0.298308	-1.32693	1558.77	FALSE	24
2022-09-14	12:57:05	-0.31159	-1.38601	1530.01	FALSE	24
2022-09-14	12:57:05	1.04668	4.65584	1563.43	FALSE	24
2022-09-14	12:57:05	1.44653	6.43445	1536.45	FALSE	24
2022-09-14	12:57:05	2.03187	9.03816	1572.47	FALSE	24
2022-09-14	12:57:06	0.917875	4.08289	1540.53	FALSE	24
2022-09-14	12:57:06	0.707087	3.14526	1575.61	FALSE	24
2022-09-14	12:57:06	0.727697	3.23694	1543.77	FALSE	24
2022-09-14	12:57:06	0.711107	3.16315	1578.77	FALSE	24
2022-09-14	12:57:07	0.689733	3.06807	1546.84	FALSE	24
2022-09-14	12:57:07	0.692684	3.0812	1581.85	FALSE	24
2022-09-14	12:57:07	0.700063	3.11402	1549.95	FALSE	24
2022-09-14	12:57:08	0.63818	2.83875	1584.69	FALSE	24
2022-09-14	12:57:08	0.585509	2.60446	1552.56	FALSE	24
2022-09-14	12:57:08	0.554567	2.46682	1587.16	FALSE	24
2022-09-14	12:57:08	0.544186	2.42065	1554.98	FALSE	24
2022-09-14	12:57:09	0.516043	2.29546	1589.46	FALSE	24
2022-09-14	12:57:09	0.594924	2.64634	1557.62	FALSE	24
2022-09-14	12:57:09	0.658791	2.93043	1592.39	FALSE	24
2022-09-14	12:57:09	0.573702	2.55194	1560.17	FALSE	24
2022-09-14	12:57:10	0.660674	2.93881	1595.33	FALSE	24
2022-09-14	12:57:10	0.472532	2.10192	1562.28	FALSE	24
2022-09-14	12:57:10	0.54159	2.4091	1597.73	FALSE	24
2022-09-14	12:57:10	0.436807	1.943	1564.22	FALSE	24
2022-09-14	12:57:11	0.43701	1.94391	1599.68	FALSE	24
2022-09-14	12:57:11	0.305713	1.35987	1565.58	FALSE	24
2022-09-14	12:57:11	0.276094	1.22812	1600.91	FALSE	24
2022-09-14	12:57:12	0.243066	1.08121	1566.66	FALSE	24
2022-09-14	12:57:12	0.257672	1.14618	1602.05	FALSE	24
2022-09-14	12:57:12	0.263473	1.17198	1567.83	FALSE	24
2022-09-14	12:57:12	0.225458	1.00288	1603.06	FALSE	24
2022-09-14	12:57:13	0.187595	0.83446	1568.67	FALSE	24
2022-09-14	12:57:13	-0.0417682	-0.185793	1603.06	FALSE	24
2022-09-14	12:57:13	-0.137595	-0.61205	1568.67	FALSE	24
2022-09-14	12:57:13	0.496959	2.21057	1605.27	FALSE	24
2022-09-14	12:57:14	0.773702	3.44158	1572.11	FALSE	24
2022-09-14	12:57:14	0.424898	1.89003	1607.16	FALSE	24
2022-09-14	12:57:14	0.690242	3.07033	1575.18	FALSE	24
2022-09-14	12:57:14	0.409021	1.81941	1608.98	FALSE	24
2022-09-14	12:57:15	0.693091	3.08301	1578.26	FALSE	24
2022-09-14	12:57:15	0.520674	2.31606	1611.29	FALSE	24
2022-09-14	12:57:15	0.660012	2.93587	1581.2	FALSE	24
2022-09-14	12:57:16	0.470089	2.09105	1613.38	FALSE	24
2022-09-14	12:57:16	0.619707	2.75658	1583.95	FALSE	24
2022-09-14	12:57:16	0.634059	2.82042	1616.2	FALSE	24
2022-09-14	12:57:16	0.547086	2.43355	1586.39	FALSE	24
2022-09-14	12:57:17	0.54729	2.43446	1618.64	FALSE	24
2022-09-14	12:57:17	0.495585	2.20446	1588.59	FALSE	24
2022-09-14	12:57:17	0.612888	2.72625	1621.36	FALSE	24
2022-09-14	12:57:17	0.461845	2.05438	1590.65	FALSE	24
2022-09-14	12:57:18	0.605967	2.69546	1624.06	FALSE	24
2022-09-14	12:57:18	0.50271	2.23615	1592.88	FALSE	24
2022-09-14	12:57:18	0.534058	2.3756	1626.43	FALSE	24
2022-09-14	12:57:18	0.603779	2.68573	1595.57	FALSE	24

## Sheet: Ursula_star_202291412522 (2)
Date	Time	Lbs	Total force x time			**GoPro Fitting: 1241
2022-09-14	12:52:02	-0.280903	0	FALSE	0
2022-09-14	12:52:02	-0.210216	0	FALSE	0
2022-09-14	12:52:02	-0.171285	0	FALSE	0
2022-09-14	12:52:03	-0.128486	0	FALSE	0
2022-09-14	12:52:03	-0.0843127	0	FALSE	0
2022-09-14	12:52:03	0.238486	0.238486	FALSE	0
2022-09-14	12:52:03	0.284949	0.523435	FALSE	0
2022-09-14	12:52:04	0.239962	0.763397	FALSE	0
2022-09-14	12:52:04	0.277926	1.04132	FALSE	0
2022-09-14	12:52:04	0.325712	1.36704	FALSE	0
2022-09-14	12:52:05	0.259046	1.62608	FALSE	0
2022-09-14	12:52:05	0.334873	1.96095	FALSE	0
2022-09-14	12:52:05	0.344593	2.30555	FALSE	0
2022-09-14	12:52:05	0.327596	2.63314	FALSE	0
2022-09-14	12:52:06	0.281031	2.91417	FALSE	0
2022-09-14	12:52:06	0.468817	3.38299	FALSE	0
2022-09-14	12:52:06	0.0608781	3.44387	FALSE	0
2022-09-14	12:52:06	0.498944	3.94281	FALSE	0
2022-09-14	12:52:07	0.397774	4.34059	FALSE	0
2022-09-14	12:52:07	0.309733	4.65032	FALSE	0
2022-09-14	12:52:07	0.165458	4.81578	FALSE	0
2022-09-14	12:52:07	0.318435	5.13421	FALSE	0
2022-09-14	12:52:08	0.364288	5.4985	FALSE	0
2022-09-14	12:52:08	0.360471	5.85897	FALSE	0
2022-09-14	12:52:08	0.337621	6.19659	FALSE	0
2022-09-14	12:52:09	0.36841	6.565	FALSE	0
2022-09-14	12:52:09	0.360165	6.92517	FALSE	0
2022-09-14	12:52:09	0.308104	7.23327	FALSE	0
2022-09-14	12:52:09	0.33243	7.5657	FALSE	0
2022-09-14	12:52:10	0.347188	7.91289	FALSE	0
2022-09-14	12:52:10	0.332481	8.24537	FALSE	0
2022-09-14	12:52:10	0.341845	8.58722	FALSE	0
2022-09-14	12:52:10	0.336654	8.92387	FALSE	0
2022-09-14	12:52:11	0.333448	9.25732	FALSE	0
2022-09-14	12:52:11	0.327087	9.58441	FALSE	0
2022-09-14	12:52:11	0.367392	9.9518	FALSE	0
2022-09-14	12:52:11	0.367646	10.3194	FALSE	0
2022-09-14	12:52:12	0.343881	10.6633	FALSE	0
2022-09-14	12:52:12	0.341794	11.0051	FALSE	0
2022-09-14	12:52:12	0.386425	11.3915	FALSE	0
2022-09-14	12:52:13	0.329529	11.7211	FALSE	0
2022-09-14	12:52:13	0.375433	12.0965	FALSE	0
2022-09-14	12:52:13	0.391107	12.4876	FALSE	0
2022-09-14	12:52:13	0.431005	12.9186	FALSE	0
2022-09-14	12:52:14	0.422659	13.3413	FALSE	0
2022-09-14	12:52:14	0.387188	13.7285	FALSE	0
2022-09-14	12:52:14	0.431005	14.1595	FALSE	0
2022-09-14	12:52:14	0.392227	14.5517	FALSE	0
2022-09-14	12:52:15	0.435687	14.9874	FALSE	0
2022-09-14	12:52:15	0.385	15.3724	FALSE	0
2022-09-14	12:52:15	0.434517	15.8069	FALSE	0
2022-09-14	12:52:15	0.43411	16.241	FALSE	0
2022-09-14	12:52:16	0.425051	16.6661	FALSE	0
2022-09-14	12:52:16	0.453448	17.1195	FALSE	0
2022-09-14	12:52:16	0.277926	17.3974	FALSE	0
2022-09-14	12:52:17	0.311463	17.7089	FALSE	0
2022-09-14	12:52:17	0.155382	17.8643	FALSE	0
2022-09-14	12:52:17	0.171769	18.036	FALSE	0
2022-09-14	12:52:17	0.228613	18.2647	FALSE	0
2022-09-14	12:52:18	0.312277	18.5769	FALSE	0
2022-09-14	12:52:18	0.266832	18.8438	FALSE	0
2022-09-14	12:52:18	0.132277	18.976	FALSE	0
2022-09-14	12:52:19	0.143117	19.1192	FALSE	0
2022-09-14	12:52:19	0.0457636	19.1649	FALSE	0
2022-09-14	12:52:19	0.20098	19.3659	FALSE	0
2022-09-14	12:52:19	0.0371122	19.403	FALSE	0
2022-09-14	12:52:19	0.163473	19.5665	FALSE	0
2022-09-14	12:52:20	0.0937025	19.6602	FALSE	0
2022-09-14	12:52:20	0.216705	19.8769	FALSE	0
2022-09-14	12:52:20	0.0989442	19.9758	FALSE	0
2022-09-14	12:52:21	0.350089	20.3259	FALSE	0
2022-09-14	12:52:21	0.199962	20.5259	FALSE	0
2022-09-14	12:52:21	-0.0154069	20.5259	FALSE	0
2022-09-14	12:52:21	0.311667	20.8376	FALSE	0
2022-09-14	12:52:22	0.598741	21.4363	FALSE	0
2022-09-14	12:52:22	0.495127	21.9314	FALSE	0
2022-09-14	12:52:22	0.959453	22.8909	FALSE	0
2022-09-14	12:52:22	0.917163	23.808	FALSE	0
2022-09-14	12:52:23	1.90525	25.7133	FALSE	0
2022-09-14	12:52:23	1.4164	27.1297	FALSE	0
2022-09-14	12:52:23	0.394415	27.5241	FALSE	0
2022-09-14	12:52:24	0.477977	28.0021	FALSE	0
2022-09-14	12:52:24	0.385	28.3871	FALSE	0
2022-09-14	12:52:24	0.510598	28.8977	FALSE	0
2022-09-14	12:52:24	0.467443	29.3651	FALSE	0
2022-09-14	12:52:25	0.509122	29.8743	FALSE	0
2022-09-14	12:52:25	0.529478	30.4037	FALSE	0
2022-09-14	12:52:25	0.424338	30.8281	FALSE	0
2022-09-14	12:52:25	0.471667	31.2997	FALSE	0
2022-09-14	12:52:26	0.394364	31.6941	FALSE	0
2022-09-14	12:52:26	0.525509	32.2196	FALSE	0
2022-09-14	12:52:26	0.393651	32.6133	FALSE	0
2022-09-14	12:52:26	0.552074	33.1653	FALSE	0
2022-09-14	12:52:27	0.468003	33.6333	FALSE	0
2022-09-14	12:52:27	0.453601	34.0869	FALSE	0
2022-09-14	12:52:27	0.419249	34.5062	FALSE	0
2022-09-14	12:52:28	0.292481	34.7987	FALSE	0
2022-09-14	12:52:28	0.419453	35.2181	FALSE	0
2022-09-14	12:52:28	0.339606	35.5577	FALSE	0
2022-09-14	12:52:28	0.369631	35.9274	FALSE	0
2022-09-14	12:52:29	0.420827	36.3482	FALSE	0
2022-09-14	12:52:29	0.379809	36.728	FALSE	0
2022-09-14	12:52:29	0.385	37.113	FALSE	0
2022-09-14	12:52:29	0.344186	37.4572	FALSE	0
2022-09-14	12:52:30	0.434008	37.8912	FALSE	0
2022-09-14	12:52:30	0.433092	38.3243	FALSE	0
2022-09-14	12:52:30	0.200267	38.5245	FALSE	0
2022-09-14	12:52:30	-0.134084	38.5245	FALSE	0
2022-09-14	12:52:31	0.296298	38.8208	FALSE	0
2022-09-14	12:52:31	0.358028	39.1789	FALSE	0
2022-09-14	12:52:31	0.713906	39.8928	FALSE	0
2022-09-14	12:52:32	1.68434	41.5771	FALSE	0
2022-09-14	12:52:32	2.49879	44.0759	FALSE	0
2022-09-14	12:52:32	5.28031	49.3562	1	1
2022-09-14	12:52:32	3.39686	52.7531	1	2
2022-09-14	12:52:33	1.60373	54.3568	FALSE	2
2022-09-14	12:52:33	3.61457	57.9714	1	3
2022-09-14	12:52:33	0.896807	58.8682	FALSE	3
2022-09-14	12:52:33	2.21075	61.0789	FALSE	3
2022-09-14	12:52:34	3.98291	65.0618	1	4
2022-09-14	12:52:34	3.63731	68.6992	1	5
2022-09-14	12:52:34	5.80927	74.5084	1	6
2022-09-14	12:52:34	3.73396	78.2424	1	7
2022-09-14	12:52:35	1.08378	79.3262	FALSE	7
2022-09-14	12:52:35	0.719758	80.0459	FALSE	7
2022-09-14	12:52:35	2.69558	82.7415	FALSE	7
2022-09-14	12:52:36	4.84719	87.5887	1	8
2022-09-14	12:52:36	4.89762	92.4863	1	9
2022-09-14	12:52:36	3.02627	95.5126	1	10
2022-09-14	12:52:36	3.75645	99.269	1	11
2022-09-14	12:52:37	0.503422	99.7725	FALSE	11
2022-09-14	12:52:37	0.721437	100.494	FALSE	11
2022-09-14	12:52:37	0.715534	101.209	FALSE	11
2022-09-14	12:52:37	0.715687	101.925	FALSE	11
2022-09-14	12:52:38	0.717824	102.643	FALSE	11
2022-09-14	12:52:38	0.721845	103.365	FALSE	11
2022-09-14	12:52:38	0.731921	104.097	FALSE	11
2022-09-14	12:52:38	0.717672	104.814	FALSE	11
2022-09-14	12:52:39	0.720572	105.535	FALSE	11
2022-09-14	12:52:39	0.724542	106.259	FALSE	11
2022-09-14	12:52:39	0.723422	106.983	FALSE	11
2022-09-14	12:52:40	7.15228	114.135	1	12
2022-09-14	12:52:40	9.18932	123.325	1	13
2022-09-14	12:52:40	9.44627	132.771	1	14
2022-09-14	12:52:40	7.18546	139.956	1	15
2022-09-14	12:52:41	1.83889	141.795	FALSE	15
2022-09-14	12:52:41	4.84194	146.637	1	16
2022-09-14	12:52:41	3.61487	150.252	1	17
2022-09-14	12:52:41	5.11838	155.37	1	18
2022-09-14	12:52:42	3.57416	158.944	1	19
2022-09-14	12:52:42	1.11655	160.061	FALSE	19
2022-09-14	12:52:42	0.521336	160.582	FALSE	19
2022-09-14	12:52:43	0.50958	161.092	FALSE	19
2022-09-14	12:52:43	0.416552	161.508	FALSE	19
2022-09-14	12:52:43	0.456756	161.965	FALSE	19
2022-09-14	12:52:43	0.721794	162.687	FALSE	19
2022-09-14	12:52:44	-0.0598852	162.687	FALSE	19
2022-09-14	12:52:44	0.1193	162.806	FALSE	19
2022-09-14	12:52:44	0.067901	162.874	FALSE	19
2022-09-14	12:52:44	0.0703438	162.945	FALSE	19
2022-09-14	12:52:45	0.0919213	163.037	FALSE	19
2022-09-14	12:52:45	0.620013	163.657	FALSE	19
2022-09-14	12:52:45	0.48556	164.142	FALSE	19
2022-09-14	12:52:45	0.290649	164.433	FALSE	19
2022-09-14	12:52:46	0.182812	164.616	FALSE	19
2022-09-14	12:52:46	0.136298	164.752	FALSE	19
2022-09-14	12:52:46	0.0902928	164.842	FALSE	19
2022-09-14	12:52:47	0.120064	164.962	FALSE	19
2022-09-14	12:52:47	-0.0536257	164.962	FALSE	19
2022-09-14	12:52:47	0.0309035	164.993	FALSE	19
2022-09-14	12:52:47	-0.0946944	164.993	FALSE	19
2022-09-14	12:52:48	0.0338043	165.027	FALSE	19
2022-09-14	12:52:48	-0.197035	165.027	FALSE	19
2022-09-14	12:52:48	-0.294643	165.027	FALSE	19
2022-09-14	12:52:48	-0.426145	165.027	FALSE	19
2022-09-14	12:52:49	-0.347977	165.027	FALSE	19
2022-09-14	12:52:49	-0.372557	165.027	FALSE	19
2022-09-14	12:52:49	-0.264771	165.027	FALSE	19
2022-09-14	12:52:49	-0.335763	165.027	FALSE	19
2022-09-14	12:52:50	-0.397595	165.027	FALSE	19
2022-09-14	12:52:50	-0.390267	165.027	FALSE	19
2022-09-14	12:52:50	-0.331743	165.027	FALSE	19
2022-09-14	12:52:51	-0.392404	165.027	FALSE	19
2022-09-14	12:52:51	-0.469554	165.027	FALSE	19
2022-09-14	12:52:51	-0.425076	165.027	FALSE	19
2022-09-14	12:52:51	-0.412557	165.027	FALSE	19
2022-09-14	12:52:52	-0.0772898	165.027	FALSE	19
2022-09-14	12:52:52	-0.293473	165.027	FALSE	19
2022-09-14	12:52:52	-0.138562	165.027	FALSE	19
2022-09-14	12:52:52	-0.139478	165.027	FALSE	19
2022-09-14	12:52:53	-0.088333	165.027	FALSE	19
2022-09-14	12:52:53	-0.190165	165.027	FALSE	19
2022-09-14	12:52:53	-0.104923	165.027	FALSE	19
2022-09-14	12:52:53	-0.17561	165.027	FALSE	19
2022-09-14	12:52:54	-0.123855	165.027	FALSE	19
2022-09-14	12:52:54	-0.286806	165.027	FALSE	19
2022-09-14	12:52:54	-0.216068	165.027	FALSE	19
2022-09-14	12:52:55	-0.283142	165.027	FALSE	19
2022-09-14	12:52:55	-0.230674	165.027	FALSE	19
2022-09-14	12:52:55	-0.338307	165.027	FALSE	19
2022-09-14	12:52:55	-0.187977	165.027	FALSE	19
2022-09-14	12:52:56	-0.177646	165.027	FALSE	19
2022-09-14	12:52:56	-0.224313	165.027	FALSE	19
2022-09-14	12:52:56	-0.368638	165.027	FALSE	19
2022-09-14	12:52:56	-0.310776	165.027	FALSE	19
2022-09-14	12:52:57	-0.449351	165.027	FALSE	19
2022-09-14	12:52:57	-0.452862	165.027	FALSE	19
2022-09-14	12:52:57	-0.466195	165.027	FALSE	19
2022-09-14	12:52:57	-0.370877	165.027	FALSE	19
2022-09-14	12:52:58	-0.665941	165.027	FALSE	19
2022-09-14	12:52:58	-0.6179	165.027	FALSE	19
2022-09-14	12:52:58	-0.660393	165.027	FALSE	19
2022-09-14	12:52:59	-0.417799	165.027	FALSE	19
2022-09-14	12:52:59	-0.478358	165.027	FALSE	19
2022-09-14	12:52:59	-0.310267	165.027	FALSE	19
2022-09-14	12:52:59	0.00963129	165.037	FALSE	19
2022-09-14	12:53:00	0.453397	165.49	FALSE	19
2022-09-14	12:53:00	0.630394	166.12	FALSE	19
2022-09-14	12:53:00	0.548155	166.668	FALSE	19
2022-09-14	12:53:00	0.713651	167.382	FALSE	19
2022-09-14	12:53:01	0.738486	168.121	FALSE	19
2022-09-14	12:53:01	1.37482	169.495	FALSE	19
2022-09-14	12:53:01	0.530751	170.026	FALSE	19
2022-09-14	12:53:02	0.960522	170.987	FALSE	19
2022-09-14	12:53:02	0.641896	171.629	FALSE	19
2022-09-14	12:53:02	0.722049	172.351	FALSE	19
2022-09-14	12:53:02	0.279962	172.631	FALSE	19
2022-09-14	12:53:03	0.448461	173.079	FALSE	19
2022-09-14	12:53:03	0.30444	173.384	FALSE	19
2022-09-14	12:53:03	0.283473	173.667	FALSE	19
2022-09-14	12:53:03	0.412023	174.079	FALSE	19
2022-09-14	12:53:04	0.304389	174.383	FALSE	19
2022-09-14	12:53:04	0.328206	174.712	FALSE	19
2022-09-14	12:53:04	0.333957	175.046	FALSE	19
2022-09-14	12:53:04	0.331819	175.377	FALSE	19
2022-09-14	12:53:05	0.320064	175.697	FALSE	19
2022-09-14	12:53:05	0.320166	176.018	FALSE	19
2022-09-14	12:53:05	0.316094	176.334	FALSE	19
2022-09-14	12:53:06	0.302863	176.637	FALSE	19
2022-09-14	12:53:06	0.289377	176.926	FALSE	19
2022-09-14	12:53:06	0.286222	177.212	FALSE	19
2022-09-14	12:53:06	0.285865	177.498	FALSE	19
2022-09-14	12:53:07	0.299758	177.798	FALSE	19
2022-09-14	12:53:07	0.326934	178.125	FALSE	19
2022-09-14	12:53:07	0.316145	178.441	FALSE	19
2022-09-14	12:53:07	0.526221	178.967	FALSE	19
2022-09-14	12:53:08	0.71869	179.686	FALSE	19
2022-09-14	12:53:08	0.71589	180.402	FALSE	19
2022-09-14	12:53:08	0.72271	181.124	FALSE	19
2022-09-14	12:53:08	0.724695	181.849	FALSE	19
2022-09-14	12:53:09	0.717366	182.566	FALSE	19
2022-09-14	12:53:09	0.725662	183.292	FALSE	19
2022-09-14	12:53:09	0.731463	184.024	FALSE	19
2022-09-14	12:53:10	0.721997	184.746	FALSE	19
2022-09-14	12:53:10	0.723728	185.469	FALSE	19
2022-09-14	12:53:10	0.716043	186.185	FALSE	19
2022-09-14	12:53:10	0.722507	186.908	FALSE	19
2022-09-14	12:53:11	0.723626	187.631	FALSE	19
2022-09-14	12:53:11	0.727748	188.359	FALSE	19
2022-09-14	12:53:11	0.719198	189.078	FALSE	19
2022-09-14	12:53:11	0.630649	189.709	FALSE	19
2022-09-14	12:53:12	0.322405	190.031	FALSE	19
2022-09-14	12:53:12	0.316705	190.348	FALSE	19
2022-09-14	12:53:12	0.32958	190.678	FALSE	19
2022-09-14	12:53:12	0.713193	191.391	FALSE	19
2022-09-14	12:53:13	0.717977	192.109	FALSE	19
2022-09-14	12:53:13	0.717672	192.827	FALSE	19
2022-09-14	12:53:13	0.715534	193.542	FALSE	19
2022-09-14	12:53:14	0.719504	194.262	FALSE	19
2022-09-14	12:53:14	0.722404	194.984	FALSE	19
2022-09-14	12:53:14	0.718842	195.703	FALSE	19
2022-09-14	12:53:14	0.720827	196.424	FALSE	19
2022-09-14	12:53:15	0.721794	197.146	FALSE	19
2022-09-14	12:53:15	0.714873	197.86	FALSE	19
2022-09-14	12:53:15	0.719198	198.58	FALSE	19
2022-09-14	12:53:15	0.720979	199.301	FALSE	19
2022-09-14	12:53:16	0.720013	200.021	FALSE	19
2022-09-14	12:53:16	0.722914	200.743	FALSE	19
2022-09-14	12:53:16	0.722914	201.466	FALSE	19
2022-09-14	12:53:16	0.726578	202.193	FALSE	19
2022-09-14	12:53:17	0.723219	202.916	FALSE	19
2022-09-14	12:53:17	0.716908	203.633	FALSE	19
2022-09-14	12:53:17	0.719453	204.353	FALSE	19
2022-09-14	12:53:18	0.719351	205.072	FALSE	19
2022-09-14	12:53:18	0.72383	205.796	FALSE	19
2022-09-14	12:53:18	0.719809	206.516	FALSE	19
2022-09-14	12:53:18	0.719046	207.235	FALSE	19
2022-09-14	12:53:19	0.724898	207.959	FALSE	19
2022-09-14	12:53:19	0.712837	208.672	FALSE	19
2022-09-14	12:53:19	0.725	209.397	FALSE	19
2022-09-14	12:53:19	0.72327	210.121	FALSE	19
2022-09-14	12:53:20	0.719962	210.841	FALSE	19
2022-09-14	12:53:20	0.723626	211.564	FALSE	19
2022-09-14	12:53:20	0.724237	212.288	FALSE	19
2022-09-14	12:53:21	0.72383	213.012	FALSE	19
2022-09-14	12:53:21	0.720369	213.733	FALSE	19
2022-09-14	12:53:21	0.724949	214.458	FALSE	19
2022-09-14	12:53:21	0.721997	215.18	FALSE	19
2022-09-14	12:53:22	0.718944	215.899	FALSE	19
2022-09-14	12:53:22	0.716501	216.615	FALSE	19
2022-09-14	12:53:22	0.719809	217.335	FALSE	19
2022-09-14	12:53:22	0.720776	218.056	FALSE	19
2022-09-14	12:53:23	0.722761	218.778	FALSE	19
2022-09-14	12:53:23	0.725611	219.504	FALSE	19
2022-09-14	12:53:23	0.720114	220.224	FALSE	19
2022-09-14	12:53:23	0.723626	220.948	FALSE	19
2022-09-14	12:53:24	0.719402	221.667	FALSE	19
2022-09-14	12:53:24	0.716298	222.383	FALSE	19
2022-09-14	12:53:24	0.724288	223.108	FALSE	19
2022-09-14	12:53:25	0.717977	223.826	FALSE	19
2022-09-14	12:53:25	0.719504	224.545	FALSE	19
2022-09-14	12:53:25	0.72042	225.266	FALSE	19
2022-09-14	12:53:25	0.725305	225.991	FALSE	19
2022-09-14	12:53:26	0.722303	226.713	FALSE	19
2022-09-14	12:53:26	0.722303	227.436	FALSE	19
2022-09-14	12:53:26	0.724847	228.16	FALSE	19
2022-09-14	12:53:26	0.721437	228.882	FALSE	19
2022-09-14	12:53:27	0.719351	229.601	FALSE	19
2022-09-14	12:53:27	0.72897	230.33	FALSE	19
2022-09-14	12:53:27	0.718791	231.049	FALSE	19
2022-09-14	12:53:27	0.718791	231.768	FALSE	19
2022-09-14	12:53:28	0.723066	232.491	FALSE	19
2022-09-14	12:53:28	0.71986	233.211	FALSE	19
2022-09-14	12:53:28	0.716654	233.927	FALSE	19
2022-09-14	12:53:29	0.714109	234.641	FALSE	19
2022-09-14	12:53:29	0.719707	235.361	FALSE	19
2022-09-14	12:53:29	0.721591	236.083	FALSE	19
2022-09-14	12:53:29	0.722354	236.805	FALSE	19
2022-09-14	12:53:30	0.720064	237.525	FALSE	19
2022-09-14	12:53:30	0.727036	238.252	FALSE	19
2022-09-14	12:53:30	0.721081	238.973	FALSE	19
2022-09-14	12:53:30	0.719046	239.692	FALSE	19
2022-09-14	12:53:31	0.721285	240.414	FALSE	19
2022-09-14	12:53:31	0.717926	241.131	FALSE	19
2022-09-14	12:53:31	0.720979	241.852	FALSE	19
2022-09-14	12:53:31	0.722965	242.575	FALSE	19
2022-09-14	12:53:32	0.720064	243.295	FALSE	19
2022-09-14	12:53:32	0.72271	244.018	FALSE	19
2022-09-14	12:53:32	0.72103	244.739	FALSE	19
2022-09-14	12:53:33	0.723779	245.463	FALSE	19
2022-09-14	12:53:33	0.717112	246.18	FALSE	19
2022-09-14	12:53:33	0.723982	246.904	FALSE	19
2022-09-14	12:53:33	0.721132	247.625	FALSE	19
2022-09-14	12:53:34	0.719707	248.345	FALSE	19
2022-09-14	12:53:34	0.717468	249.062	FALSE	19
2022-09-14	12:53:34	0.716196	249.779	FALSE	19
2022-09-14	12:53:34	0.721437	250.5	FALSE	19
2022-09-14	12:53:35	0.713855	251.214	FALSE	19
2022-09-14	12:53:35	0.718435	251.932	FALSE	19
2022-09-14	12:53:35	0.726832	252.659	FALSE	19
2022-09-14	12:53:36	0.719555	253.379	FALSE	19
2022-09-14	12:53:36	0.715789	254.095	FALSE	19
2022-09-14	12:53:36	0.71757	254.812	FALSE	19
2022-09-14	12:53:36	0.722608	255.535	FALSE	19
2022-09-14	12:53:37	0.720064	256.255	FALSE	19
2022-09-14	12:53:37	0.71813	256.973	FALSE	19
2022-09-14	12:53:37	0.725407	257.698	FALSE	19
2022-09-14	12:53:38	0.719809	258.418	FALSE	19
2022-09-14	12:53:38	0.720776	259.139	FALSE	19
2022-09-14	12:53:38	0.715331	259.854	FALSE	19
2022-09-14	12:53:38	0.724949	260.579	FALSE	19
2022-09-14	12:53:38	0.722201	261.301	FALSE	19
2022-09-14	12:53:39	0.718232	262.02	FALSE	19
2022-09-14	12:53:39	0.720064	262.74	FALSE	19
2022-09-14	12:53:39	0.72556	263.465	FALSE	19
2022-09-14	12:53:40	0.723473	264.189	FALSE	19
2022-09-14	12:53:40	0.720674	264.909	FALSE	19
2022-09-14	12:53:40	0.717112	265.626	FALSE	19
2022-09-14	12:53:40	0.726934	266.353	FALSE	19
2022-09-14	12:53:41	0.732684	267.086	FALSE	19
2022-09-14	12:53:41	0.729478	267.816	FALSE	19
2022-09-14	12:53:41	0.717417	268.533	FALSE	19
2022-09-14	12:53:41	0.722354	269.255	FALSE	19
2022-09-14	12:53:42	0.719249	269.975	FALSE	19
2022-09-14	12:53:42	0.72902	270.704	FALSE	19
2022-09-14	12:53:42	0.722914	271.427	FALSE	19
2022-09-14	12:53:42	0.728206	272.155	FALSE	19
2022-09-14	12:53:43	0.718079	272.873	FALSE	19
2022-09-14	12:53:43	0.722761	273.596	FALSE	19
2022-09-14	12:53:43	0.717468	274.313	FALSE	19
2022-09-14	12:53:44	0.721387	275.034	FALSE	19
2022-09-14	12:53:44	0.722608	275.757	FALSE	19
2022-09-14	12:53:44	0.71701	276.474	FALSE	19
2022-09-14	12:53:44	0.724237	277.198	FALSE	19
2022-09-14	12:53:45	0.72612	277.924	FALSE	19
2022-09-14	12:53:45	0.726578	278.651	FALSE	19
2022-09-14	12:53:45	0.721285	279.372	FALSE	19
2022-09-14	12:53:45	0.729326	280.102	FALSE	19
2022-09-14	12:53:46	0.730089	280.832	FALSE	19
2022-09-14	12:53:46	0.720369	281.552	FALSE	19
2022-09-14	12:53:46	0.72617	282.278	FALSE	19
2022-09-14	12:53:46	0.723422	283.002	FALSE	19
2022-09-14	12:53:47	0.723728	283.725	FALSE	19
2022-09-14	12:53:47	0.720979	284.446	FALSE	19
2022-09-14	12:53:47	0.719911	285.166	FALSE	19
2022-09-14	12:53:48	0.727392	285.894	FALSE	19
2022-09-14	12:53:48	0.715025	286.609	FALSE	19
2022-09-14	12:53:48	0.721285	287.33	FALSE	19
2022-09-14	12:53:48	0.720623	288.051	FALSE	19
2022-09-14	12:53:49	0.718181	288.769	FALSE	19
2022-09-14	12:53:49	0.720725	289.489	FALSE	19
2022-09-14	12:53:49	0.715178	290.205	FALSE	19
2022-09-14	12:53:49	0.718791	290.923	FALSE	19
2022-09-14	12:53:50	0.726781	291.65	FALSE	19
2022-09-14	12:53:50	0.723473	292.374	FALSE	19
2022-09-14	12:53:50	0.720979	293.095	FALSE	19
2022-09-14	12:53:50	0.724084	293.819	FALSE	19
2022-09-14	12:53:51	0.724847	294.544	FALSE	19
2022-09-14	12:53:51	0.726934	295.271	FALSE	19
2022-09-14	12:53:51	0.725204	295.996	FALSE	19
2022-09-14	12:53:52	0.724237	296.72	FALSE	19
2022-09-14	12:53:52	0.718639	297.439	FALSE	19
2022-09-14	12:53:52	0.720572	298.159	FALSE	19
2022-09-14	12:53:52	0.721794	298.881	FALSE	19
2022-09-14	12:53:53	0.724135	299.605	FALSE	19
2022-09-14	12:53:53	0.725611	300.331	FALSE	19
2022-09-14	12:53:53	0.720318	301.051	FALSE	19
2022-09-14	12:53:53	0.723117	301.774	FALSE	19
2022-09-14	12:53:54	0.721997	302.496	FALSE	19
2022-09-14	12:53:54	0.714008	303.21	FALSE	19
2022-09-14	12:53:54	0.717672	303.928	FALSE	19
2022-09-14	12:53:55	0.732735	304.661	FALSE	19
2022-09-14	12:53:55	0.722201	305.383	FALSE	19
2022-09-14	12:53:55	0.721895	306.105	FALSE	19
2022-09-14	12:53:55	0.721997	306.827	FALSE	19
2022-09-14	12:53:56	0.723168	307.55	FALSE	19
2022-09-14	12:53:56	0.715992	308.266	FALSE	19
2022-09-14	12:53:56	0.721183	308.987	FALSE	19
2022-09-14	12:53:56	0.73243	309.719	FALSE	19
2022-09-14	12:53:57	0.721845	310.441	FALSE	19
2022-09-14	12:53:57	0.719097	311.16	FALSE	19
2022-09-14	12:53:57	0.727494	311.888	FALSE	19
2022-09-14	12:53:57	0.728766	312.617	FALSE	19
2022-09-14	12:53:58	0.719911	313.337	FALSE	19
2022-09-14	12:53:58	0.70902	314.046	FALSE	19
2022-09-14	12:53:58	0.713041	314.759	FALSE	19
2022-09-14	12:53:59	0.725662	315.484	FALSE	19
2022-09-14	12:53:59	0.719351	316.204	FALSE	19
2022-09-14	12:53:59	0.723015	316.927	FALSE	19
2022-09-14	12:53:59	0.724288	317.651	FALSE	19
2022-09-14	12:54:00	0.725051	318.376	FALSE	19
2022-09-14	12:54:00	0.721336	319.097	FALSE	19
2022-09-14	12:54:00	0.722099	319.819	FALSE	19
2022-09-14	12:54:00	0.721539	320.541	FALSE	19
2022-09-14	12:54:01	0.720216	321.261	FALSE	19
2022-09-14	12:54:01	0.724084	321.985	FALSE	19
2022-09-14	12:54:01	0.716857	322.702	FALSE	19
2022-09-14	12:54:01	0.719962	323.422	FALSE	19
2022-09-14	12:54:02	0.72327	324.145	FALSE	19
2022-09-14	12:54:02	0.719707	324.865	FALSE	19
2022-09-14	12:54:02	0.716959	325.582	FALSE	19
2022-09-14	12:54:03	0.720878	326.303	FALSE	19
2022-09-14	12:54:03	0.721488	327.024	FALSE	19
2022-09-14	12:54:03	0.724796	327.749	FALSE	19
2022-09-14	12:54:03	0.725204	328.474	FALSE	19
2022-09-14	12:54:04	0.718893	329.193	FALSE	19
2022-09-14	12:54:04	0.725865	329.919	FALSE	19
2022-09-14	12:54:04	0.724389	330.644	FALSE	19
2022-09-14	12:54:04	0.724746	331.368	FALSE	19
2022-09-14	12:54:05	0.7193	332.088	FALSE	19
2022-09-14	12:54:05	0.720013	332.808	FALSE	19
2022-09-14	12:54:05	0.722049	333.53	FALSE	19
2022-09-14	12:54:05	0.714924	334.245	FALSE	19
2022-09-14	12:54:06	0.720572	334.965	FALSE	19
2022-09-14	12:54:06	0.724796	335.69	FALSE	19
2022-09-14	12:54:06	0.712837	336.403	FALSE	19
2022-09-14	12:54:07	0.723066	337.126	FALSE	19
2022-09-14	12:54:07	0.718028	337.844	FALSE	19
2022-09-14	12:54:07	0.716908	338.561	FALSE	19
2022-09-14	12:54:07	0.723982	339.285	FALSE	19
2022-09-14	12:54:08	0.722354	340.007	FALSE	19
2022-09-14	12:54:08	0.721183	340.728	FALSE	19
2022-09-14	12:54:08	0.720572	341.449	FALSE	19
2022-09-14	12:54:08	0.721997	342.171	FALSE	19
2022-09-14	12:54:09	0.725153	342.896	FALSE	19
2022-09-14	12:54:09	0.721845	343.618	FALSE	19
2022-09-14	12:54:09	0.724288	344.342	FALSE	19
2022-09-14	12:54:09	0.711718	345.054	FALSE	19
2022-09-14	12:54:10	0.727188	345.781	FALSE	19
2022-09-14	12:54:10	0.714109	346.495	FALSE	19
2022-09-14	12:54:10	0.722608	347.218	FALSE	19
2022-09-14	12:54:11	0.715382	347.933	FALSE	19
2022-09-14	12:54:11	0.725	348.658	FALSE	19
2022-09-14	12:54:11	0.721946	349.38	FALSE	19
2022-09-14	12:54:11	0.720318	350.1	FALSE	19
2022-09-14	12:54:12	0.722049	350.822	FALSE	19
2022-09-14	12:54:12	0.721692	351.544	FALSE	19
2022-09-14	12:54:12	0.720267	352.264	FALSE	19
2022-09-14	12:54:12	0.72215	352.987	FALSE	19
2022-09-14	12:54:13	0.727748	353.714	FALSE	19
2022-09-14	12:54:13	0.724186	354.439	FALSE	19
2022-09-14	12:54:13	0.723117	355.162	FALSE	19
2022-09-14	12:54:14	0.720929	355.883	FALSE	19
2022-09-14	12:54:14	0.722354	356.605	FALSE	19
2022-09-14	12:54:14	0.727646	357.333	FALSE	19
2022-09-14	12:54:14	0.723524	358.056	FALSE	19
2022-09-14	12:54:15	0.718028	358.774	FALSE	19
2022-09-14	12:54:15	0.724491	359.499	FALSE	19
2022-09-14	12:54:15	0.719046	360.218	FALSE	19
2022-09-14	12:54:15	0.724796	360.942	FALSE	19
2022-09-14	12:54:16	0.72103	361.663	FALSE	19
2022-09-14	12:54:16	0.723321	362.387	FALSE	19
2022-09-14	12:54:16	0.720725	363.108	FALSE	19
2022-09-14	12:54:16	0.72042	363.828	FALSE	19
2022-09-14	12:54:17	0.725814	364.554	FALSE	19
2022-09-14	12:54:17	0.725458	365.279	FALSE	19
2022-09-14	12:54:17	0.719148	365.998	FALSE	19
2022-09-14	12:54:18	0.722761	366.721	FALSE	19
2022-09-14	12:54:18	0.722862	367.444	FALSE	19
2022-09-14	12:54:18	0.719707	368.164	FALSE	19
2022-09-14	12:54:18	0.724135	368.888	FALSE	19
2022-09-14	12:54:19	0.718588	369.606	FALSE	19
2022-09-14	12:54:19	0.719962	370.326	FALSE	19
2022-09-14	12:54:19	0.716399	371.043	FALSE	19
2022-09-14	12:54:19	0.723015	371.766	FALSE	19
2022-09-14	12:54:20	0.719148	372.485	FALSE	19
2022-09-14	12:54:20	0.722557	373.207	FALSE	19
2022-09-14	12:54:20	0.723372	373.931	FALSE	19
2022-09-14	12:54:20	0.724135	374.655	FALSE	19
2022-09-14	12:54:21	0.723626	375.379	FALSE	19
2022-09-14	12:54:21	0.727443	376.106	FALSE	19
2022-09-14	12:54:21	0.715687	376.822	FALSE	19
2022-09-14	12:54:22	0.721946	377.544	FALSE	19
2022-09-14	12:54:22	0.723015	378.267	FALSE	19
2022-09-14	12:54:22	0.714924	378.982	FALSE	19
2022-09-14	12:54:22	0.722404	379.704	FALSE	19
2022-09-14	12:54:23	0.723066	380.427	FALSE	19
2022-09-14	12:54:23	0.720929	381.148	FALSE	19
2022-09-14	12:54:23	0.721845	381.87	FALSE	19
2022-09-14	12:54:23	0.720929	382.591	FALSE	19
2022-09-14	12:54:24	0.718842	383.31	FALSE	19
2022-09-14	12:54:24	0.722049	384.032	FALSE	19
2022-09-14	12:54:24	0.727341	384.759	FALSE	19
2022-09-14	12:54:24	0.719758	385.479	FALSE	19
2022-09-14	12:54:25	0.725662	386.204	FALSE	19
2022-09-14	12:54:25	0.719453	386.924	FALSE	19
2022-09-14	12:54:25	0.561845	387.486	FALSE	19
2022-09-14	12:54:26	0.632328	388.118	FALSE	19
2022-09-14	12:54:26	0.718639	388.837	FALSE	19
2022-09-14	12:54:26	0.726883	389.564	FALSE	19
2022-09-14	12:54:26	0.725204	390.289	FALSE	19
2022-09-14	12:54:27	0.836145	391.125	FALSE	19
2022-09-14	12:54:27	1.12902	392.254	FALSE	19
2022-09-14	12:54:27	0.7193	392.973	FALSE	19
2022-09-14	12:54:27	0.718384	393.692	FALSE	19
2022-09-14	12:54:28	0.73187	394.424	FALSE	19
2022-09-14	12:54:28	0.727596	395.151	FALSE	19
2022-09-14	12:54:28	0.723779	395.875	FALSE	19
2022-09-14	12:54:28	0.726578	396.601	FALSE	19
2022-09-14	12:54:29	0.724338	397.326	FALSE	19
2022-09-14	12:54:29	0.719351	398.045	FALSE	19
2022-09-14	12:54:29	0.722761	398.768	FALSE	19
2022-09-14	12:54:30	0.716247	399.484	FALSE	19
2022-09-14	12:54:30	0.725254	400.209	FALSE	19
2022-09-14	12:54:30	0.718232	400.928	FALSE	19
2022-09-14	12:54:30	0.724135	401.652	FALSE	19
2022-09-14	12:54:31	0.72388	402.376	FALSE	19
2022-09-14	12:54:31	0.720216	403.096	FALSE	19
2022-09-14	12:54:31	0.716908	403.813	FALSE	19
2022-09-14	12:54:31	0.722965	404.536	FALSE	19
2022-09-14	12:54:32	0.721997	405.258	FALSE	19
2022-09-14	12:54:32	0.724389	405.982	FALSE	19
2022-09-14	12:54:32	0.727646	406.71	FALSE	19
2022-09-14	12:54:32	0.718486	407.428	FALSE	19
2022-09-14	12:54:33	0.721997	408.15	FALSE	19
2022-09-14	12:54:33	0.726221	408.877	FALSE	19
2022-09-14	12:54:33	0.724491	409.601	FALSE	19
2022-09-14	12:54:34	0.721845	410.323	FALSE	19
2022-09-14	12:54:34	0.722354	411.045	FALSE	19
2022-09-14	12:54:34	0.732532	411.778	FALSE	19
2022-09-14	12:54:34	0.728919	412.507	FALSE	19
2022-09-14	12:54:35	0.729936	413.237	FALSE	19
2022-09-14	12:54:35	0.724644	413.961	FALSE	19
2022-09-14	12:54:35	0.72327	414.685	FALSE	19
2022-09-14	12:54:35	0.722812	415.407	FALSE	19
2022-09-14	12:54:36	0.723626	416.131	FALSE	19
2022-09-14	12:54:36	0.725611	416.857	FALSE	19
2022-09-14	12:54:36	0.719911	417.576	FALSE	19
2022-09-14	12:54:37	0.716043	418.293	FALSE	19
2022-09-14	12:54:37	0.72612	419.019	FALSE	19
2022-09-14	12:54:37	0.730751	419.749	FALSE	19
2022-09-14	12:54:37	0.726883	420.476	FALSE	19
2022-09-14	12:54:38	0.717316	421.194	FALSE	19
2022-09-14	12:54:38	0.730445	421.924	FALSE	19
2022-09-14	12:54:38	0.728308	422.652	FALSE	19
2022-09-14	12:54:38	0.718995	423.371	FALSE	19
2022-09-14	12:54:39	0.733092	424.104	FALSE	19
2022-09-14	12:54:39	0.730496	424.835	FALSE	19
2022-09-14	12:54:39	0.728817	425.564	FALSE	19
2022-09-14	12:54:39	0.727697	426.291	FALSE	19
2022-09-14	12:54:40	0.721336	427.013	FALSE	19
2022-09-14	12:54:40	0.724898	427.738	FALSE	19
2022-09-14	12:54:40	0.721895	428.46	FALSE	19
2022-09-14	12:54:41	0.71243	429.172	FALSE	19
2022-09-14	12:54:41	0.719148	429.891	FALSE	19
2022-09-14	12:54:41	0.719198	430.61	FALSE	19
2022-09-14	12:54:41	0.716196	431.327	FALSE	19
2022-09-14	12:54:42	0.723372	432.05	FALSE	19
2022-09-14	12:54:42	0.730089	432.78	FALSE	19
2022-09-14	12:54:42	0.715789	433.496	FALSE	19
2022-09-14	12:54:42	0.724033	434.22	FALSE	19
2022-09-14	12:54:43	0.71472	434.935	FALSE	19
2022-09-14	12:54:43	0.723066	435.658	FALSE	19
2022-09-14	12:54:43	0.726985	436.385	FALSE	19
2022-09-14	12:54:43	0.726832	437.111	FALSE	19
2022-09-14	12:54:44	0.72556	437.837	FALSE	19
2022-09-14	12:54:44	0.718079	438.555	FALSE	19
2022-09-14	12:54:44	0.729529	439.285	FALSE	19
2022-09-14	12:54:45	0.720827	440.005	FALSE	19
2022-09-14	12:54:45	0.721692	440.727	FALSE	19
2022-09-14	12:54:45	0.726578	441.454	FALSE	19
2022-09-14	12:54:45	0.723626	442.177	FALSE	19
2022-09-14	12:54:46	0.720623	442.898	FALSE	19
2022-09-14	12:54:46	0.484186	443.382	FALSE	19
2022-09-14	12:54:46	0.731667	444.114	FALSE	19
2022-09-14	12:54:46	0.727392	444.841	FALSE	19
2022-09-14	12:54:47	0.720827	445.562	FALSE	19
2022-09-14	12:54:47	0.728664	446.291	FALSE	19
2022-09-14	12:54:47	0.725051	447.016	FALSE	19
2022-09-14	12:54:47	0.72897	447.745	FALSE	19
2022-09-14	12:54:48	0.727494	448.472	FALSE	19
2022-09-14	12:54:48	0.724237	449.196	FALSE	19
2022-09-14	12:54:48	0.726629	449.923	FALSE	19
2022-09-14	12:54:49	0.727392	450.65	FALSE	19
2022-09-14	12:54:49	0.717366	451.368	FALSE	19
2022-09-14	12:54:49	0.723066	452.091	FALSE	19
2022-09-14	12:54:49	0.72388	452.815	FALSE	19
2022-09-14	12:54:50	0.717468	453.532	FALSE	19
2022-09-14	12:54:50	0.726578	454.259	FALSE	19
2022-09-14	12:54:50	0.719402	454.978	FALSE	19
2022-09-14	12:54:50	0.722404	455.701	FALSE	19
2022-09-14	12:54:51	0.728461	456.429	FALSE	19
2022-09-14	12:54:51	0.731616	457.161	FALSE	19
2022-09-14	12:54:51	0.723575	457.884	FALSE	19
2022-09-14	12:54:51	0.721743	458.606	FALSE	19
2022-09-14	12:54:52	0.727545	459.334	FALSE	19
2022-09-14	12:54:52	0.723066	460.057	FALSE	19
2022-09-14	12:54:52	0.717824	460.774	FALSE	19
2022-09-14	12:54:53	0.724288	461.499	FALSE	19
2022-09-14	12:54:53	0.724949	462.224	FALSE	19
2022-09-14	12:54:53	0.720878	462.945	FALSE	19
2022-09-14	12:54:53	0.723015	463.668	FALSE	19
2022-09-14	12:54:54	0.726832	464.394	FALSE	19
2022-09-14	12:54:54	0.718893	465.113	FALSE	19
2022-09-14	12:54:54	0.720572	465.834	FALSE	19
2022-09-14	12:54:54	0.720725	466.555	FALSE	19
2022-09-14	12:54:55	0.72444	467.279	FALSE	19
2022-09-14	12:54:55	0.728104	468.007	FALSE	19
2022-09-14	12:54:55	0.729886	468.737	FALSE	19
2022-09-14	12:54:56	0.730801	469.468	FALSE	19
2022-09-14	12:54:56	0.725865	470.194	FALSE	19
2022-09-14	12:54:56	0.723982	470.918	FALSE	19
2022-09-14	12:54:56	0.722914	471.641	FALSE	19
2022-09-14	12:54:57	0.724491	472.365	FALSE	19
2022-09-14	12:54:57	0.725763	473.091	FALSE	19
2022-09-14	12:54:57	0.724542	473.815	FALSE	19
2022-09-14	12:54:57	0.724949	474.54	FALSE	19
2022-09-14	12:54:58	0.729173	475.269	FALSE	19
2022-09-14	12:54:58	0.721285	475.991	FALSE	19
2022-09-14	12:54:58	0.722404	476.713	FALSE	19
2022-09-14	12:54:58	0.726832	477.44	FALSE	19
2022-09-14	12:54:59	0.722914	478.163	FALSE	19
2022-09-14	12:54:59	0.717112	478.88	FALSE	19
2022-09-14	12:54:59	0.725967	479.606	FALSE	19
2022-09-14	12:55:00	0.725458	480.331	FALSE	19
2022-09-14	12:55:00	0.733244	481.065	FALSE	19
2022-09-14	12:55:00	0.721997	481.787	FALSE	19
2022-09-14	12:55:00	0.525102	482.312	FALSE	19
2022-09-14	12:55:01	0.156654	482.468	FALSE	19
2022-09-14	12:55:01	0.386323	482.855	FALSE	19
2022-09-14	12:55:01	0.562557	483.417	FALSE	19
2022-09-14	12:55:01	0.262761	483.68	FALSE	19
2022-09-14	12:55:02	0.251463	483.932	FALSE	19
2022-09-14	12:55:02	0.240776	484.172	FALSE	19
2022-09-14	12:55:02	0.717774	484.89	FALSE	19
2022-09-14	12:55:02	0.71874	485.609	FALSE	19
2022-09-14	12:55:03	0.721234	486.33	FALSE	19
2022-09-14	12:55:03	0.72327	487.053	FALSE	19
2022-09-14	12:55:03	0.724288	487.778	FALSE	19
2022-09-14	12:55:04	0.539249	488.317	FALSE	19
2022-09-14	12:55:04	0.731565	489.048	FALSE	19
2022-09-14	12:55:04	0.735941	489.784	FALSE	19
2022-09-14	12:55:04	0.723422	490.508	FALSE	19
2022-09-14	12:55:05	0.723473	491.231	FALSE	19
2022-09-14	12:55:05	0.728868	491.96	FALSE	19
2022-09-14	12:55:05	0.724746	492.685	FALSE	19
2022-09-14	12:55:05	0.717672	493.403	FALSE	19
2022-09-14	12:55:06	0.722507	494.125	FALSE	19
2022-09-14	12:55:06	0.724491	494.85	FALSE	19
2022-09-14	12:55:06	0.718232	495.568	FALSE	19
2022-09-14	12:55:06	0.720776	496.289	FALSE	19
2022-09-14	12:55:07	0.726934	497.016	FALSE	19
2022-09-14	12:55:07	0.719758	497.735	FALSE	19
2022-09-14	12:55:07	0.726221	498.462	FALSE	19
2022-09-14	12:55:08	0.728766	499.19	FALSE	19
2022-09-14	12:55:08	0.724949	499.915	FALSE	19
2022-09-14	12:55:08	0.727239	500.642	FALSE	19
2022-09-14	12:55:08	0.72617	501.369	FALSE	19
2022-09-14	12:55:09	0.716552	502.085	FALSE	19
2022-09-14	12:55:09	0.723524	502.809	FALSE	19
2022-09-14	12:55:09	0.722252	503.531	FALSE	19
2022-09-14	12:55:09	0.718282	504.249	FALSE	19
2022-09-14	12:55:10	0.725662	504.975	FALSE	19
2022-09-14	12:55:10	0.723219	505.698	FALSE	19
2022-09-14	12:55:10	0.723677	506.422	FALSE	19
2022-09-14	12:55:10	0.72215	507.144	FALSE	19
2022-09-14	12:55:11	0.732786	507.877	FALSE	19
2022-09-14	12:55:11	0.725509	508.602	FALSE	19
2022-09-14	12:55:11	0.724491	509.327	FALSE	19
2022-09-14	12:55:12	0.724847	510.052	FALSE	19
2022-09-14	12:55:12	0.727494	510.779	FALSE	19
2022-09-14	12:55:12	0.726425	511.505	FALSE	19
2022-09-14	12:55:12	0.72958	512.235	FALSE	19
2022-09-14	12:55:13	0.729886	512.965	FALSE	19
2022-09-14	12:55:13	0.73187	513.697	FALSE	19
2022-09-14	12:55:13	0.721234	514.418	FALSE	19
2022-09-14	12:55:13	0.728461	515.147	FALSE	19
2022-09-14	12:55:14	0.724898	515.871	FALSE	19
2022-09-14	12:55:14	0.72729	516.599	FALSE	19
2022-09-14	12:55:14	0.723066	517.322	FALSE	19
2022-09-14	12:55:14	0.723066	518.045	FALSE	19
2022-09-14	12:55:15	0.72958	518.774	FALSE	19
2022-09-14	12:55:15	0.72785	519.502	FALSE	19
2022-09-14	12:55:15	0.727952	520.23	FALSE	19
2022-09-14	12:55:16	0.721591	520.952	FALSE	19
2022-09-14	12:55:16	0.725254	521.677	FALSE	19
2022-09-14	12:55:16	0.729936	522.407	FALSE	19
2022-09-14	12:55:16	0.725407	523.132	FALSE	19
2022-09-14	12:55:17	0.723473	523.856	FALSE	19
2022-09-14	12:55:17	1.53676	525.393	FALSE	19
2022-09-14	12:55:17	0.726272	526.119	FALSE	19
2022-09-14	12:55:17	0.726832	526.846	FALSE	19
2022-09-14	12:55:18	0.725153	527.571	FALSE	19
2022-09-14	12:55:18	0.730343	528.301	FALSE	19
2022-09-14	12:55:18	0.728817	529.03	FALSE	19
2022-09-14	12:55:19	0.726323	529.756	FALSE	19
2022-09-14	12:55:19	0.722914	530.479	FALSE	19
2022-09-14	12:55:19	0.732634	531.212	FALSE	19
2022-09-14	12:55:19	0.722965	531.935	FALSE	19
2022-09-14	12:55:20	0.728562	532.663	FALSE	19
2022-09-14	12:55:20	0.719656	533.383	FALSE	19
2022-09-14	12:55:20	0.727392	534.111	FALSE	19
2022-09-14	12:55:20	0.728868	534.839	FALSE	19
2022-09-14	12:55:21	3.03579	537.875	1	20
2022-09-14	12:55:21	0.725204	538.6	FALSE	20
2022-09-14	12:55:21	0.727239	539.328	FALSE	20
2022-09-14	12:55:21	0.713906	540.042	FALSE	20
2022-09-14	12:55:22	0.70388	540.745	FALSE	20
2022-09-14	12:55:22	0.580623	541.326	FALSE	20
2022-09-14	12:55:22	0.899351	542.225	FALSE	20
2022-09-14	12:55:23	0.893702	543.119	FALSE	20
2022-09-14	12:55:23	-0.0145926	543.119	FALSE	20
2022-09-14	12:55:23	-0.377035	543.119	FALSE	20
2022-09-14	12:55:23	-0.526959	543.119	FALSE	20
2022-09-14	12:55:24	-0.602226	543.119	FALSE	20
2022-09-14	12:55:24	-0.740699	543.119	FALSE	20
2022-09-14	12:55:24	-0.773269	543.119	FALSE	20
2022-09-14	12:55:24	-0.871183	543.119	FALSE	20
2022-09-14	12:55:25	-0.92421	543.119	FALSE	20
2022-09-14	12:55:25	-1.07271	543.119	FALSE	20
2022-09-14	12:55:25	-1.17027	543.119	FALSE	20
2022-09-14	12:55:25	-1.22416	543.119	FALSE	20
2022-09-14	12:55:26	-1.30294	543.119	FALSE	20
2022-09-14	12:55:26	-1.3921	543.119	FALSE	20
2022-09-14	12:55:26	-1.62172	543.119	FALSE	20
2022-09-14	12:55:27	-1.49347	543.119	FALSE	20
2022-09-14	12:55:27	-1.38915	543.119	FALSE	20
2022-09-14	12:55:27	-0.480139	543.119	FALSE	20
2022-09-14	12:55:27	1.69813	544.817	FALSE	20
2022-09-14	12:55:28	2.19604	547.013	FALSE	20
2022-09-14	12:55:28	0.414771	547.428	FALSE	20
2022-09-14	12:55:28	1.36006	548.788	FALSE	20
2022-09-14	12:55:28	-0.00273512	548.788	FALSE	20
2022-09-14	12:55:29	-0.273575	548.788	FALSE	20
2022-09-14	12:55:29	-0.262175	548.788	FALSE	20
2022-09-14	12:55:29	0.405	549.193	FALSE	20
2022-09-14	12:55:29	-0.381921	549.193	FALSE	20
2022-09-14	12:55:30	-0.887518	549.193	FALSE	20
2022-09-14	12:55:30	-0.750267	549.193	FALSE	20
2022-09-14	12:55:30	-0.481005	549.193	FALSE	20
2022-09-14	12:55:31	0.181489	549.375	FALSE	20
2022-09-14	12:55:31	0.232888	549.607	FALSE	20
2022-09-14	12:55:31	-0.333931	549.607	FALSE	20
2022-09-14	12:55:31	-0.53103	549.607	FALSE	20
2022-09-14	12:55:32	-0.418918	549.607	FALSE	20
2022-09-14	12:55:32	-0.453524	549.607	FALSE	20
2022-09-14	12:55:32	-0.254949	549.607	FALSE	20
2022-09-14	12:55:32	-0.19276	549.607	FALSE	20
2022-09-14	12:55:33	-0.245229	549.607	FALSE	20
2022-09-14	12:55:33	-0.156119	549.607	FALSE	20
2022-09-14	12:55:33	-0.0377987	549.607	FALSE	20
2022-09-14	12:55:33	-0.0227351	549.607	FALSE	20
2022-09-14	12:55:34	-0.0406995	549.607	FALSE	20
2022-09-14	12:55:34	0.000470984	549.608	FALSE	20
2022-09-14	12:55:34	-0.318307	549.608	FALSE	20
2022-09-14	12:55:35	-1.03179	549.608	FALSE	20
2022-09-14	12:55:35	-1.21805	549.608	FALSE	20
2022-09-14	12:55:35	-1.24635	549.608	FALSE	20
2022-09-14	12:55:35	-1.27815	549.608	FALSE	20
2022-09-14	12:55:36	-1.34925	549.608	FALSE	20
2022-09-14	12:55:36	-1.4094	549.608	FALSE	20
2022-09-14	12:55:36	-1.23139	549.608	FALSE	20
2022-09-14	12:55:36	-1.38884	549.608	FALSE	20
2022-09-14	12:55:37	-1.50553	549.608	FALSE	20
2022-09-14	12:55:37	-1.6263	549.608	FALSE	20
2022-09-14	12:55:37	-1.54803	549.608	FALSE	20
2022-09-14	12:55:37	-1.80258	549.608	FALSE	20
2022-09-14	12:55:38	-2.43617	549.608	FALSE	20
2022-09-14	12:55:38	-2.05276	549.608	FALSE	20
2022-09-14	12:55:38	-1.85327	549.608	FALSE	20
2022-09-14	12:55:39	-1.08757	549.608	FALSE	20
2022-09-14	12:55:39	-0.403142	549.608	FALSE	20
2022-09-14	12:55:39	-1.11826	549.608	FALSE	20
2022-09-14	12:55:39	-0.818205	549.608	FALSE	20
2022-09-14	12:55:40	-1.19515	549.608	FALSE	20
2022-09-14	12:55:40	-1.53393	549.608	FALSE	20
2022-09-14	12:55:40	-1.59882	549.608	FALSE	20
2022-09-14	12:55:40	-1.18655	549.608	FALSE	20
2022-09-14	12:55:41	-1.36487	549.608	FALSE	20
2022-09-14	12:55:41	-1.58732	549.608	FALSE	20
2022-09-14	12:55:41	-1.38859	549.608	FALSE	20
2022-09-14	12:55:41	-1.55683	549.608	FALSE	20
2022-09-14	12:55:42	-1.49113	549.608	FALSE	20
2022-09-14	12:55:42	-0.450979	549.608	FALSE	20
2022-09-14	12:55:42	-0.249351	549.608	FALSE	20
2022-09-14	12:55:43	-0.384363	549.608	FALSE	20
2022-09-14	12:55:43	-0.316933	549.608	FALSE	20
2022-09-14	12:55:43	-0.373575	549.608	FALSE	20
2022-09-14	12:55:43	-0.373473	549.608	FALSE	20
2022-09-14	12:55:44	-0.648027	549.608	FALSE	20
2022-09-14	12:55:44	-0.780292	549.608	FALSE	20
2022-09-14	12:55:44	-0.794999	549.608	FALSE	20
2022-09-14	12:55:44	-0.882328	549.608	FALSE	20
2022-09-14	12:55:45	-0.847417	549.608	FALSE	20
2022-09-14	12:55:45	-0.832658	549.608	FALSE	20
2022-09-14	12:55:45	-0.658765	549.608	FALSE	20
2022-09-14	12:55:46	-0.515712	549.608	FALSE	20
2022-09-14	12:55:46	-0.433066	549.608	FALSE	20
2022-09-14	12:55:46	-0.398206	549.608	FALSE	20
2022-09-14	12:55:46	-0.399681	549.608	FALSE	20
2022-09-14	12:55:47	-0.183346	549.608	FALSE	20
2022-09-14	12:55:47	-0.192964	549.608	FALSE	20
2022-09-14	12:55:47	-0.245076	549.608	FALSE	20
2022-09-14	12:55:47	-0.0278242	549.608	FALSE	20
2022-09-14	12:55:48	-0.185178	549.608	FALSE	20
2022-09-14	12:55:48	-0.122888	549.608	FALSE	20
2022-09-14	12:55:48	-0.135305	549.608	FALSE	20
2022-09-14	12:55:48	-0.0956613	549.608	FALSE	20
2022-09-14	12:55:49	-0.0794272	549.608	FALSE	20
2022-09-14	12:55:49	-0.0850761	549.608	FALSE	20
2022-09-14	12:55:49	-0.0973915	549.608	FALSE	20
2022-09-14	12:55:50	-0.104872	549.608	FALSE	20
2022-09-14	12:55:50	0.106832	549.715	FALSE	20
2022-09-14	12:55:50	-0.000597729	549.715	FALSE	20
2022-09-14	12:55:50	0.280165	549.995	FALSE	20
2022-09-14	12:55:51	0.199504	550.194	FALSE	20
2022-09-14	12:55:51	0.325763	550.52	FALSE	20
2022-09-14	12:55:51	0.266985	550.787	FALSE	20
2022-09-14	12:55:51	0.282812	551.07	FALSE	20
2022-09-14	12:55:52	0.260776	551.331	FALSE	20
2022-09-14	12:55:52	0.244389	551.575	FALSE	20
2022-09-14	12:55:52	0.366425	551.942	FALSE	20
2022-09-14	12:55:52	0.258791	552.2	FALSE	20
2022-09-14	12:55:53	0.356349	552.557	FALSE	20
2022-09-14	12:55:53	0.351463	552.908	FALSE	20
2022-09-14	12:55:53	0.27299	553.181	FALSE	20
2022-09-14	12:55:54	0.354669	553.536	FALSE	20
2022-09-14	12:55:54	0.376807	553.913	FALSE	20
2022-09-14	12:55:54	0.529733	554.442	FALSE	20
2022-09-14	12:55:54	0.533957	554.976	FALSE	20
2022-09-14	12:55:55	0.47528	555.452	FALSE	20
2022-09-14	12:55:55	0.439198	555.891	FALSE	20
2022-09-14	12:55:55	0.407443	556.298	FALSE	20
2022-09-14	12:55:55	0.420522	556.719	FALSE	20
2022-09-14	12:55:56	0.479555	557.198	FALSE	20
2022-09-14	12:55:56	0.476043	557.674	FALSE	20
2022-09-14	12:55:56	0.36098	558.035	FALSE	20
2022-09-14	12:55:56	0.381845	558.417	FALSE	20
2022-09-14	12:55:57	0.373397	558.791	FALSE	20
2022-09-14	12:55:57	0.309631	559.1	FALSE	20
2022-09-14	12:55:57	0.315992	559.416	FALSE	20
2022-09-14	12:55:58	0.22388	559.64	FALSE	20
2022-09-14	12:55:58	0.285967	559.926	FALSE	20
2022-09-14	12:55:58	0.604898	560.531	FALSE	20
2022-09-14	12:55:58	0.391412	560.922	FALSE	20
2022-09-14	12:55:59	0.482964	561.405	FALSE	20
2022-09-14	12:55:59	0.365051	561.77	FALSE	20
2022-09-14	12:55:59	0.409529	562.18	FALSE	20
2022-09-14	12:55:59	0.469529	562.649	FALSE	20
2022-09-14	12:56:00	0.418435	563.068	FALSE	20
2022-09-14	12:56:00	0.473499	563.541	FALSE	20
2022-09-14	12:56:00	0.448512	563.99	FALSE	20
2022-09-14	12:56:00	0.381285	564.371	FALSE	20
2022-09-14	12:56:01	0.37411	564.745	FALSE	20
2022-09-14	12:56:01	0.43701	565.182	FALSE	20
2022-09-14	12:56:01	0.303372	565.486	FALSE	20
2022-09-14	12:56:02	0.384898	565.871	FALSE	20
2022-09-14	12:56:02	0.426221	566.297	FALSE	20
2022-09-14	12:56:02	0.39355	566.69	FALSE	20
2022-09-14	12:56:02	0.515789	567.206	FALSE	20
2022-09-14	12:56:03	0.544745	567.751	FALSE	20
2022-09-14	12:56:03	0.545763	568.297	FALSE	20
2022-09-14	12:56:03	0.458181	568.755	FALSE	20
2022-09-14	12:56:03	0.505102	569.26	FALSE	20
2022-09-14	12:56:04	0.295738	569.556	FALSE	20
2022-09-14	12:56:04	0.31701	569.873	FALSE	20
2022-09-14	12:56:04	0.421743	570.294	FALSE	20
2022-09-14	12:56:04	0.500216	570.795	FALSE	20
2022-09-14	12:56:05	0.511005	571.306	FALSE	20
2022-09-14	12:56:05	0.775687	572.081	FALSE	20
2022-09-14	12:56:05	0.834822	572.916	FALSE	20
2022-09-14	12:56:06	0.747341	573.663	FALSE	20
2022-09-14	12:56:06	0.569275	574.233	FALSE	20
2022-09-14	12:56:06	0.506934	574.74	FALSE	20
2022-09-14	12:56:06	0.519606	575.259	FALSE	20
2022-09-14	12:56:07	0.537265	575.797	FALSE	20
2022-09-14	12:56:07	0.637163	576.434	FALSE	20
2022-09-14	12:56:07	0.945763	577.379	FALSE	20
2022-09-14	12:56:07	1.27375	578.653	FALSE	20
2022-09-14	12:56:08	1.30719	579.96	FALSE	20
2022-09-14	12:56:08	1.1508	581.111	FALSE	20
2022-09-14	12:56:08	1.18307	582.294	FALSE	20
2022-09-14	12:56:08	1.00073	583.295	FALSE	20
2022-09-14	12:56:09	0.86958	584.165	FALSE	20
2022-09-14	12:56:09	0.800623	584.965	FALSE	20
2022-09-14	12:56:09	0.812379	585.778	FALSE	20
2022-09-14	12:56:10	0.867341	586.645	FALSE	20
2022-09-14	12:56:10	0.857265	587.502	FALSE	20
2022-09-14	12:56:10	0.923117	588.425	FALSE	20
2022-09-14	12:56:10	0.910751	589.336	FALSE	20
2022-09-14	12:56:11	0.858639	590.195	FALSE	20
2022-09-14	12:56:11	0.885254	591.08	FALSE	20
2022-09-14	12:56:11	0.739249	591.819	FALSE	20
2022-09-14	12:56:11	0.702252	592.521	FALSE	20
2022-09-14	12:56:12	0.830598	593.352	FALSE	20
2022-09-14	12:56:12	0.651361	594.003	FALSE	20
2022-09-14	12:56:12	0.630191	594.634	FALSE	20
2022-09-14	12:56:12	0.638791	595.272	FALSE	20
2022-09-14	12:56:13	0.721895	595.994	FALSE	20
2022-09-14	12:56:13	0.657265	596.652	FALSE	20
2022-09-14	12:56:13	0.560318	597.212	FALSE	20
2022-09-14	12:56:14	0.540165	597.752	FALSE	20
2022-09-14	12:56:14	0.518944	598.271	FALSE	20
2022-09-14	12:56:14	0.573702	598.845	FALSE	20
2022-09-14	12:56:14	0.601285	599.446	FALSE	20
2022-09-14	12:56:15	0.643524	600.09	FALSE	20
2022-09-14	12:56:15	0.63986	600.729	FALSE	20
2022-09-14	12:56:15	0.646425	601.376	FALSE	20
2022-09-14	12:56:15	0.675687	602.051	FALSE	20
2022-09-14	12:56:16	0.642914	602.694	FALSE	20
2022-09-14	12:56:16	0.596399	603.291	FALSE	20
2022-09-14	12:56:16	0.534364	603.825	FALSE	20
2022-09-14	12:56:17	0.488104	604.313	FALSE	20
2022-09-14	12:56:17	0.502659	604.816	FALSE	20
2022-09-14	12:56:17	0.473804	605.29	FALSE	20
2022-09-14	12:56:17	0.505509	605.795	FALSE	20
2022-09-14	12:56:18	0.513092	606.308	FALSE	20
2022-09-14	12:56:18	0.502303	606.811	FALSE	20
2022-09-14	12:56:18	0.485051	607.296	FALSE	20
2022-09-14	12:56:18	0.523982	607.82	FALSE	20
2022-09-14	12:56:19	0.584084	608.404	FALSE	20
2022-09-14	12:56:19	0.581845	608.986	FALSE	20
2022-09-14	12:56:19	0.574415	609.56	FALSE	20
2022-09-14	12:56:19	0.617316	610.177	FALSE	20
2022-09-14	12:56:20	0.660216	610.838	FALSE	20
2022-09-14	12:56:20	0.672685	611.51	FALSE	20
2022-09-14	12:56:20	0.686425	612.197	FALSE	20
2022-09-14	12:56:21	0.696654	612.893	FALSE	20
2022-09-14	12:56:21	0.858689	613.752	FALSE	20
2022-09-14	12:56:21	1.10536	614.857	FALSE	20
2022-09-14	12:56:21	1.02668	615.884	FALSE	20
2022-09-14	12:56:22	1.05024	616.934	FALSE	20
2022-09-14	12:56:22	0.884033	617.818	FALSE	20
2022-09-14	12:56:22	0.985458	618.804	FALSE	20
2022-09-14	12:56:22	0.960776	619.765	FALSE	20
2022-09-14	12:56:23	0.959657	620.724	FALSE	20
2022-09-14	12:56:23	0.980114	621.704	FALSE	20
2022-09-14	12:56:23	1.13823	622.843	FALSE	20
2022-09-14	12:56:23	1.15955	624.002	FALSE	20
2022-09-14	12:56:24	1.22658	625.229	FALSE	20
2022-09-14	12:56:24	1.31767	626.546	FALSE	20
2022-09-14	12:56:24	1.04892	627.595	FALSE	20
2022-09-14	12:56:25	0.975229	628.57	FALSE	20
2022-09-14	12:56:25	0.984186	629.555	FALSE	20
2022-09-14	12:56:25	1.02047	630.575	FALSE	20
2022-09-14	12:56:25	1.07497	631.65	FALSE	20
2022-09-14	12:56:26	1.17497	632.825	FALSE	20
2022-09-14	12:56:26	1.11599	633.941	FALSE	20
2022-09-14	12:56:26	0.791311	634.732	FALSE	20
2022-09-14	12:56:26	0.434669	635.167	FALSE	20
2022-09-14	12:56:27	-0.968892	635.167	FALSE	20
2022-09-14	12:56:27	-1.23128	635.167	FALSE	20
2022-09-14	12:56:27	-1.38558	635.167	FALSE	20
2022-09-14	12:56:27	-1.50314	635.167	FALSE	20
2022-09-14	12:56:28	-1.56961	635.167	FALSE	20
2022-09-14	12:56:28	-1.60731	635.167	FALSE	20
2022-09-14	12:56:28	-1.65703	635.167	FALSE	20
2022-09-14	12:56:29	-1.70192	635.167	FALSE	20
2022-09-14	12:56:29	-1.87312	635.167	FALSE	20
2022-09-14	12:56:29	-1.93668	635.167	FALSE	20
2022-09-14	12:56:29	-2.00548	635.167	FALSE	20
2022-09-14	12:56:30	-2.05805	635.167	FALSE	20
2022-09-14	12:56:30	-2.07225	635.167	FALSE	20
2022-09-14	12:56:30	-2.18533	635.167	FALSE	20
2022-09-14	12:56:30	-2.29805	635.167	FALSE	20
2022-09-14	12:56:31	-2.55902	635.167	FALSE	20
2022-09-14	12:56:31	-2.65357	635.167	FALSE	20
2022-09-14	12:56:31	-2.92645	635.167	FALSE	20
2022-09-14	12:56:31	-2.92736	635.167	FALSE	20
2022-09-14	12:56:32	-3.15576	635.167	FALSE	20
2022-09-14	12:56:32	-3.21159	635.167	FALSE	20
2022-09-14	12:56:32	-3.52228	635.167	FALSE	20
2022-09-14	12:56:33	-3.55978	635.167	FALSE	20
2022-09-14	12:56:33	-3.46462	635.167	FALSE	20
2022-09-14	12:56:33	-3.37515	635.167	FALSE	20
2022-09-14	12:56:33	-3.33953	635.167	FALSE	20
2022-09-14	12:56:34	-2.40085	635.167	FALSE	20
2022-09-14	12:56:34	0.72785	635.895	FALSE	20
2022-09-14	12:56:34	0.725305	636.62	FALSE	20
2022-09-14	12:56:34	0.72841	637.349	FALSE	20
2022-09-14	12:56:35	0.727188	638.076	FALSE	20
2022-09-14	12:56:35	0.727239	638.803	FALSE	20
2022-09-14	12:56:35	0.72271	639.526	FALSE	20
2022-09-14	12:56:35	0.723422	640.249	FALSE	20
2022-09-14	12:56:36	0.729377	640.979	FALSE	20
2022-09-14	12:56:36	0.719198	641.698	FALSE	20
2022-09-14	12:56:36	0.720521	642.418	FALSE	20
2022-09-14	12:56:37	0.707952	643.126	FALSE	20
2022-09-14	12:56:37	0.710293	643.837	FALSE	20
2022-09-14	12:56:37	0.705814	644.542	FALSE	20
2022-09-14	12:56:37	0.704288	645.247	FALSE	20
2022-09-14	12:56:38	-0.348129	645.247	FALSE	20
2022-09-14	12:56:38	-1.68823	645.247	FALSE	20
2022-09-14	12:56:38	-1.65134	645.247	FALSE	20
2022-09-14	12:56:38	-1.49785	645.247	FALSE	20
2022-09-14	12:56:39	0.325102	645.572	FALSE	20
2022-09-14	12:56:39	0.517519	646.089	FALSE	20
2022-09-14	12:56:39	0.461743	646.551	FALSE	20
2022-09-14	12:56:39	0.501132	647.052	FALSE	20
2022-09-14	12:56:40	0.386272	647.438	FALSE	20
2022-09-14	12:56:40	0.402252	647.841	FALSE	20
2022-09-14	12:56:40	0.43584	648.276	FALSE	20
2022-09-14	12:56:41	0.413651	648.69	FALSE	20
2022-09-14	12:56:41	0.366018	649.056	FALSE	20
2022-09-14	12:56:41	0.424338	649.48	FALSE	20
2022-09-14	12:56:41	0.412735	649.893	FALSE	20
2022-09-14	12:56:42	0.390903	650.284	FALSE	20
2022-09-14	12:56:42	0.466629	650.751	FALSE	20
2022-09-14	12:56:42	0.463982	651.215	FALSE	20
2022-09-14	12:56:42	0.523168	651.738	FALSE	20
2022-09-14	12:56:43	0.497367	652.235	FALSE	20
2022-09-14	12:56:43	0.508155	652.743	FALSE	20
2022-09-14	12:56:43	0.456603	653.2	FALSE	20
2022-09-14	12:56:43	0.392023	653.592	FALSE	20
2022-09-14	12:56:44	0.364644	653.957	FALSE	20
2022-09-14	12:56:44	0.35472	654.311	FALSE	20
2022-09-14	12:56:44	0.41757	654.729	FALSE	20
2022-09-14	12:56:45	0.466069	655.195	FALSE	20
2022-09-14	12:56:45	0.408461	655.604	FALSE	20
2022-09-14	12:56:45	0.368461	655.972	FALSE	20
2022-09-14	12:56:45	0.365814	656.338	FALSE	20
2022-09-14	12:56:46	0.378537	656.716	FALSE	20
2022-09-14	12:56:46	0.461998	657.178	FALSE	20
2022-09-14	12:56:46	0.330089	657.508	FALSE	20
2022-09-14	12:56:46	0.458384	657.967	FALSE	20
2022-09-14	12:56:47	0.499758	658.467	FALSE	20
2022-09-14	12:56:47	0.582761	659.049	FALSE	20
2022-09-14	12:56:47	0.610496	659.66	FALSE	20
2022-09-14	12:56:47	0.601081	660.261	FALSE	20
2022-09-14	12:56:48	0.514262	660.775	FALSE	20
2022-09-14	12:56:48	0.481183	661.256	FALSE	20
2022-09-14	12:56:48	0.493804	661.75	FALSE	20
2022-09-14	12:56:49	0.442456	662.193	FALSE	20
2022-09-14	12:56:49	0.465356	662.658	FALSE	20
2022-09-14	12:56:49	0.375026	663.033	FALSE	20
2022-09-14	12:56:49	0.41757	663.451	FALSE	20
2022-09-14	12:56:50	0.429886	663.88	FALSE	20
2022-09-14	12:56:50	0.401641	664.282	FALSE	20
2022-09-14	12:56:50	0.441336	664.723	FALSE	20
2022-09-14	12:56:50	0.434568	665.158	FALSE	20
2022-09-14	12:56:51	0.533804	665.692	FALSE	20
2022-09-14	12:56:51	0.614822	666.307	FALSE	20
2022-09-14	12:56:51	0.569479	666.876	FALSE	20
2022-09-14	12:56:51	0.516043	667.392	FALSE	20
2022-09-14	12:56:52	0.582303	667.974	FALSE	20
2022-09-14	12:56:52	0.443524	668.418	FALSE	20
2022-09-14	12:56:52	0.476349	668.894	FALSE	20
2022-09-14	12:56:53	0.520471	669.415	FALSE	20
2022-09-14	12:56:53	0.510038	669.925	FALSE	20
2022-09-14	12:56:53	0.915534	670.84	FALSE	20
2022-09-14	12:56:53	1.60128	672.442	FALSE	20
2022-09-14	12:56:54	2.8993	675.341	FALSE	20
2022-09-14	12:56:54	3.73375	679.075	1	21
2022-09-14	12:56:54	3.50327	682.578	1	22
2022-09-14	12:56:54	2.4109	684.989	FALSE	22
2022-09-14	12:56:55	1.96933	686.958	FALSE	22
2022-09-14	12:56:55	1.91299	688.871	FALSE	22
2022-09-14	12:56:55	3.12434	691.996	1	23
2022-09-14	12:56:56	3.18088	695.176	1	24
2022-09-14	12:56:56	2.51375	697.69	FALSE	24
2022-09-14	12:56:56	2.29248	699.983	FALSE	24
2022-09-14	12:56:56	1.6363	701.619	FALSE	24
2022-09-14	12:56:57	1.32301	702.942	FALSE	24
2022-09-14	12:56:57	1.08561	704.028	FALSE	24
2022-09-14	12:56:57	0.859962	704.888	FALSE	24
2022-09-14	12:56:57	0.717316	705.605	FALSE	24
2022-09-14	12:56:58	0.479249	706.084	FALSE	24
2022-09-14	12:56:58	-1.06116	706.084	FALSE	24
2022-09-14	12:56:58	-1.57047	706.084	FALSE	24
2022-09-14	12:56:58	-0.960089	706.084	FALSE	24
2022-09-14	12:56:59	-0.705127	706.084	FALSE	24
2022-09-14	12:56:59	-0.991437	706.084	FALSE	24
2022-09-14	12:56:59	0.667901	706.752	FALSE	24
2022-09-14	12:57:00	0.734466	707.486	FALSE	24
2022-09-14	12:57:00	0.454517	707.941	FALSE	24
2022-09-14	12:57:00	-0.597239	707.941	FALSE	24
2022-09-14	12:57:00	-0.650877	707.941	FALSE	24
2022-09-14	12:57:01	-0.72762	707.941	FALSE	24
2022-09-14	12:57:01	-1.75342	707.941	FALSE	24
2022-09-14	12:57:01	0.653295	708.594	FALSE	24
2022-09-14	12:57:01	0.655433	709.25	FALSE	24
2022-09-14	12:57:02	0.693499	709.943	FALSE	24
2022-09-14	12:57:02	1.15375	711.097	FALSE	24
2022-09-14	12:57:02	1.08714	712.184	FALSE	24
2022-09-14	12:57:02	0.470649	712.655	FALSE	24
2022-09-14	12:57:03	-0.496781	712.655	FALSE	24
2022-09-14	12:57:03	-0.534694	712.655	FALSE	24
2022-09-14	12:57:03	-0.577951	712.655	FALSE	24
2022-09-14	12:57:04	-0.486043	712.655	FALSE	24
2022-09-14	12:57:04	-0.572913	712.655	FALSE	24
2022-09-14	12:57:04	-0.500394	712.655	FALSE	24
2022-09-14	12:57:04	-0.298308	712.655	FALSE	24
2022-09-14	12:57:05	-0.31159	712.655	FALSE	24
2022-09-14	12:57:05	1.04668	713.701	FALSE	24
2022-09-14	12:57:05	1.44653	715.148	FALSE	24
2022-09-14	12:57:05	2.03187	717.18	FALSE	24
2022-09-14	12:57:06	0.917875	718.098	FALSE	24
2022-09-14	12:57:06	0.707087	718.805	FALSE	24
2022-09-14	12:57:06	0.727697	719.532	FALSE	24
2022-09-14	12:57:06	0.711107	720.244	FALSE	24
2022-09-14	12:57:07	0.689733	720.933	FALSE	24
2022-09-14	12:57:07	0.692684	721.626	FALSE	24
2022-09-14	12:57:07	0.700063	722.326	FALSE	24
2022-09-14	12:57:08	0.63818	722.964	FALSE	24
2022-09-14	12:57:08	0.585509	723.55	FALSE	24
2022-09-14	12:57:08	0.554567	724.104	FALSE	24
2022-09-14	12:57:08	0.544186	724.648	FALSE	24
2022-09-14	12:57:09	0.516043	725.165	FALSE	24
2022-09-14	12:57:09	0.594924	725.759	FALSE	24
2022-09-14	12:57:09	0.658791	726.418	FALSE	24
2022-09-14	12:57:09	0.573702	726.992	FALSE	24
2022-09-14	12:57:10	0.660674	727.653	FALSE	24
2022-09-14	12:57:10	0.472532	728.125	FALSE	24
2022-09-14	12:57:10	0.54159	728.667	FALSE	24
2022-09-14	12:57:10	0.436807	729.104	FALSE	24
2022-09-14	12:57:11	0.43701	729.541	FALSE	24
2022-09-14	12:57:11	0.305713	729.846	FALSE	24
2022-09-14	12:57:11	0.276094	730.122	FALSE	24
2022-09-14	12:57:12	0.243066	730.365	FALSE	24
2022-09-14	12:57:12	0.257672	730.623	FALSE	24
2022-09-14	12:57:12	0.263473	730.887	FALSE	24
2022-09-14	12:57:12	0.225458	731.112	FALSE	24
2022-09-14	12:57:13	0.187595	731.3	FALSE	24
2022-09-14	12:57:13	-0.0417682	731.3	FALSE	24
2022-09-14	12:57:13	-0.137595	731.3	FALSE	24
2022-09-14	12:57:13	0.496959	731.797	FALSE	24
2022-09-14	12:57:14	0.773702	732.57	FALSE	24
2022-09-14	12:57:14	0.424898	732.995	FALSE	24
2022-09-14	12:57:14	0.690242	733.685	FALSE	24
2022-09-14	12:57:14	0.409021	734.094	FALSE	24
2022-09-14	12:57:15	0.693091	734.788	FALSE	24
2022-09-14	12:57:15	0.520674	735.308	FALSE	24
2022-09-14	12:57:15	0.660012	735.968	FALSE	24
2022-09-14	12:57:16	0.470089	736.438	FALSE	24
2022-09-14	12:57:16	0.619707	737.058	FALSE	24
2022-09-14	12:57:16	0.634059	737.692	FALSE	24
2022-09-14	12:57:16	0.547086	738.239	FALSE	24
2022-09-14	12:57:17	0.54729	738.786	FALSE	24
2022-09-14	12:57:17	0.495585	739.282	FALSE	24
2022-09-14	12:57:17	0.612888	739.895	FALSE	24
2022-09-14	12:57:17	0.461845	740.357	FALSE	24
2022-09-14	12:57:18	0.605967	740.963	FALSE	24
2022-09-14	12:57:18	0.50271	741.465	FALSE	24
2022-09-14	12:57:18	0.534058	742	FALSE	24
2022-09-14	12:57:18	0.603779	742.603	FALSE	24
2022-09-14	12:57:19	0.766272	743.37	FALSE	24
2022-09-14	12:57:19	0.962099	744.332	FALSE	24
2022-09-14	12:57:19	0.532125	744.864	FALSE	24
2022-09-14	12:57:20	0.525662	745.389	FALSE	24
2022-09-14	12:57:20	0.573804	745.963	FALSE	24
2022-09-14	12:57:20	0.492685	746.456	FALSE	24
2022-09-14	12:57:20	0.50668	746.963	FALSE	24
2022-09-14	12:57:21	0.407443	747.37	FALSE	24
2022-09-14	12:57:21	0.381132	747.751	FALSE	24
2022-09-14	12:57:21	0.445967	748.197	FALSE	24
2022-09-14	12:57:21	0.471769	748.669	FALSE	24
2022-09-14	12:57:22	0.422201	749.091	FALSE	24

## Sheet: Ursula_star_202291412522
						**GoPro Fitting: 1241
2022-09-14	12:52:02	-0.280903
2022-09-14	12:52:02	-0.210216
2022-09-14	12:52:02	-0.171285
2022-09-14	12:52:03	-0.128486
2022-09-14	12:52:03	-0.0843127
2022-09-14	12:52:03	0.238486
2022-09-14	12:52:03	0.284949
2022-09-14	12:52:04	0.239962
2022-09-14	12:52:04	0.277926
2022-09-14	12:52:04	0.325712
2022-09-14	12:52:05	0.259046
2022-09-14	12:52:05	0.334873
2022-09-14	12:52:05	0.344593
2022-09-14	12:52:05	0.327596
2022-09-14	12:52:06	0.281031
2022-09-14	12:52:06	0.468817
2022-09-14	12:52:06	0.0608781
2022-09-14	12:52:06	0.498944
2022-09-14	12:52:07	0.397774
2022-09-14	12:52:07	0.309733
2022-09-14	12:52:07	0.165458
2022-09-14	12:52:07	0.318435
2022-09-14	12:52:08	0.364288
2022-09-14	12:52:08	0.360471
2022-09-14	12:52:08	0.337621
2022-09-14	12:52:09	0.36841
2022-09-14	12:52:09	0.360165
2022-09-14	12:52:09	0.308104
2022-09-14	12:52:09	0.33243
2022-09-14	12:52:10	0.347188
2022-09-14	12:52:10	0.332481
2022-09-14	12:52:10	0.341845
2022-09-14	12:52:10	0.336654
2022-09-14	12:52:11	0.333448
2022-09-14	12:52:11	0.327087
2022-09-14	12:52:11	0.367392
2022-09-14	12:52:11	0.367646
2022-09-14	12:52:12	0.343881
2022-09-14	12:52:12	0.341794
2022-09-14	12:52:12	0.386425
2022-09-14	12:52:13	0.329529
2022-09-14	12:52:13	0.375433
2022-09-14	12:52:13	0.391107
2022-09-14	12:52:13	0.431005
2022-09-14	12:52:14	0.422659
2022-09-14	12:52:14	0.387188
2022-09-14	12:52:14	0.431005
2022-09-14	12:52:14	0.392227
2022-09-14	12:52:15	0.435687
2022-09-14	12:52:15	0.385
2022-09-14	12:52:15	0.434517
2022-09-14	12:52:15	0.43411
2022-09-14	12:52:16	0.425051
2022-09-14	12:52:16	0.453448
2022-09-14	12:52:16	0.277926
2022-09-14	12:52:17	0.311463
2022-09-14	12:52:17	0.155382
2022-09-14	12:52:17	0.171769
2022-09-14	12:52:17	0.228613
2022-09-14	12:52:18	0.312277
2022-09-14	12:52:18	0.266832
2022-09-14	12:52:18	0.132277
2022-09-14	12:52:19	0.143117
2022-09-14	12:52:19	0.0457636
2022-09-14	12:52:19	0.20098
2022-09-14	12:52:19	0.0371122
2022-09-14	12:52:19	0.163473
2022-09-14	12:52:20	0.0937025
2022-09-14	12:52:20	0.216705
2022-09-14	12:52:20	0.0989442
2022-09-14	12:52:21	0.350089
2022-09-14	12:52:21	0.199962
2022-09-14	12:52:21	-0.0154069
2022-09-14	12:52:21	0.311667
2022-09-14	12:52:22	0.598741
2022-09-14	12:52:22	0.495127
2022-09-14	12:52:22	0.959453
2022-09-14	12:52:22	0.917163
2022-09-14	12:52:23	1.90525
2022-09-14	12:52:23	1.4164
2022-09-14	12:52:23	0.394415
2022-09-14	12:52:24	0.477977
2022-09-14	12:52:24	0.385
2022-09-14	12:52:24	0.510598
2022-09-14	12:52:24	0.467443
2022-09-14	12:52:25	0.509122
2022-09-14	12:52:25	0.529478
2022-09-14	12:52:25	0.424338
2022-09-14	12:52:25	0.471667
2022-09-14	12:52:26	0.394364
2022-09-14	12:52:26	0.525509
2022-09-14	12:52:26	0.393651
2022-09-14	12:52:26	0.552074
2022-09-14	12:52:27	0.468003
2022-09-14	12:52:27	0.453601
2022-09-14	12:52:27	0.419249
2022-09-14	12:52:28	0.292481
2022-09-14	12:52:28	0.419453
2022-09-14	12:52:28	0.339606
2022-09-14	12:52:28	0.369631
2022-09-14	12:52:29	0.420827
2022-09-14	12:52:29	0.379809
2022-09-14	12:52:29	0.385
2022-09-14	12:52:29	0.344186
2022-09-14	12:52:30	0.434008
2022-09-14	12:52:30	0.433092
2022-09-14	12:52:30	0.200267
2022-09-14	12:52:30	-0.134084
2022-09-14	12:52:31	0.296298
2022-09-14	12:52:31	0.358028
2022-09-14	12:52:31	0.713906
2022-09-14	12:52:32	1.68434
2022-09-14	12:52:32	2.49879
2022-09-14	12:52:32	5.28031
2022-09-14	12:52:32	3.39686
2022-09-14	12:52:33	1.60373
2022-09-14	12:52:33	3.61457
2022-09-14	12:52:33	0.896807
2022-09-14	12:52:33	2.21075
2022-09-14	12:52:34	3.98291
2022-09-14	12:52:34	3.63731
2022-09-14	12:52:34	5.80927
2022-09-14	12:52:34	3.73396
2022-09-14	12:52:35	1.08378
2022-09-14	12:52:35	0.719758
2022-09-14	12:52:35	2.69558
2022-09-14	12:52:36	4.84719
2022-09-14	12:52:36	4.89762
2022-09-14	12:52:36	3.02627
2022-09-14	12:52:36	3.75645
2022-09-14	12:52:37	0.503422
2022-09-14	12:52:37	0.721437
2022-09-14	12:52:37	0.715534
2022-09-14	12:52:37	0.715687
2022-09-14	12:52:38	0.717824
2022-09-14	12:52:38	0.721845
2022-09-14	12:52:38	0.731921
2022-09-14	12:52:38	0.717672
2022-09-14	12:52:39	0.720572
2022-09-14	12:52:39	0.724542
2022-09-14	12:52:39	0.723422
2022-09-14	12:52:40	7.15228
2022-09-14	12:52:40	9.18932
2022-09-14	12:52:40	9.44627
2022-09-14	12:52:40	7.18546
2022-09-14	12:52:41	1.83889
2022-09-14	12:52:41	4.84194
2022-09-14	12:52:41	3.61487
2022-09-14	12:52:41	5.11838
2022-09-14	12:52:42	3.57416
2022-09-14	12:52:42	1.11655
2022-09-14	12:52:42	0.521336
2022-09-14	12:52:43	0.50958
2022-09-14	12:52:43	0.416552
2022-09-14	12:52:43	0.456756
2022-09-14	12:52:43	0.721794
2022-09-14	12:52:44	-0.0598852
2022-09-14	12:52:44	0.1193
2022-09-14	12:52:44	0.067901
2022-09-14	12:52:44	0.0703438
2022-09-14	12:52:45	0.0919213
2022-09-14	12:52:45	0.620013
2022-09-14	12:52:45	0.48556
2022-09-14	12:52:45	0.290649
2022-09-14	12:52:46	0.182812
2022-09-14	12:52:46	0.136298
2022-09-14	12:52:46	0.0902928
2022-09-14	12:52:47	0.120064
2022-09-14	12:52:47	-0.0536257
2022-09-14	12:52:47	0.0309035
2022-09-14	12:52:47	-0.0946944
2022-09-14	12:52:48	0.0338043
2022-09-14	12:52:48	-0.197035
2022-09-14	12:52:48	-0.294643
2022-09-14	12:52:48	-0.426145
2022-09-14	12:52:49	-0.347977
2022-09-14	12:52:49	-0.372557
2022-09-14	12:52:49	-0.264771
2022-09-14	12:52:49	-0.335763
2022-09-14	12:52:50	-0.397595
2022-09-14	12:52:50	-0.390267
2022-09-14	12:52:50	-0.331743
2022-09-14	12:52:51	-0.392404
2022-09-14	12:52:51	-0.469554
2022-09-14	12:52:51	-0.425076
2022-09-14	12:52:51	-0.412557
2022-09-14	12:52:52	-0.0772898
2022-09-14	12:52:52	-0.293473
2022-09-14	12:52:52	-0.138562
2022-09-14	12:52:52	-0.139478
2022-09-14	12:52:53	-0.088333
2022-09-14	12:52:53	-0.190165
2022-09-14	12:52:53	-0.104923
2022-09-14	12:52:53	-0.17561
2022-09-14	12:52:54	-0.123855
2022-09-14	12:52:54	-0.286806
2022-09-14	12:52:54	-0.216068
2022-09-14	12:52:55	-0.283142
2022-09-14	12:52:55	-0.230674
2022-09-14	12:52:55	-0.338307
2022-09-14	12:52:55	-0.187977
2022-09-14	12:52:56	-0.177646
2022-09-14	12:52:56	-0.224313
2022-09-14	12:52:56	-0.368638
2022-09-14	12:52:56	-0.310776
2022-09-14	12:52:57	-0.449351
2022-09-14	12:52:57	-0.452862
2022-09-14	12:52:57	-0.466195
2022-09-14	12:52:57	-0.370877
2022-09-14	12:52:58	-0.665941
2022-09-14	12:52:58	-0.6179
2022-09-14	12:52:58	-0.660393
2022-09-14	12:52:59	-0.417799
2022-09-14	12:52:59	-0.478358
2022-09-14	12:52:59	-0.310267
2022-09-14	12:52:59	0.00963129
2022-09-14	12:53:00	0.453397
2022-09-14	12:53:00	0.630394
2022-09-14	12:53:00	0.548155
2022-09-14	12:53:00	0.713651
2022-09-14	12:53:01	0.738486
2022-09-14	12:53:01	1.37482
2022-09-14	12:53:01	0.530751
2022-09-14	12:53:02	0.960522
2022-09-14	12:53:02	0.641896
2022-09-14	12:53:02	0.722049
2022-09-14	12:53:02	0.279962
2022-09-14	12:53:03	0.448461
2022-09-14	12:53:03	0.30444
2022-09-14	12:53:03	0.283473
2022-09-14	12:53:03	0.412023
2022-09-14	12:53:04	0.304389
2022-09-14	12:53:04	0.328206
2022-09-14	12:53:04	0.333957
2022-09-14	12:53:04	0.331819
2022-09-14	12:53:05	0.320064
2022-09-14	12:53:05	0.320166
2022-09-14	12:53:05	0.316094
2022-09-14	12:53:06	0.302863
2022-09-14	12:53:06	0.289377
2022-09-14	12:53:06	0.286222
2022-09-14	12:53:06	0.285865
2022-09-14	12:53:07	0.299758
2022-09-14	12:53:07	0.326934
2022-09-14	12:53:07	0.316145
2022-09-14	12:53:07	0.526221
2022-09-14	12:53:08	0.71869
2022-09-14	12:53:08	0.71589
2022-09-14	12:53:08	0.72271
2022-09-14	12:53:08	0.724695
2022-09-14	12:53:09	0.717366
2022-09-14	12:53:09	0.725662
2022-09-14	12:53:09	0.731463
2022-09-14	12:53:10	0.721997
2022-09-14	12:53:10	0.723728
2022-09-14	12:53:10	0.716043
2022-09-14	12:53:10	0.722507
2022-09-14	12:53:11	0.723626
2022-09-14	12:53:11	0.727748
2022-09-14	12:53:11	0.719198
2022-09-14	12:53:11	0.630649
2022-09-14	12:53:12	0.322405
2022-09-14	12:53:12	0.316705
2022-09-14	12:53:12	0.32958
2022-09-14	12:53:12	0.713193
2022-09-14	12:53:13	0.717977
2022-09-14	12:53:13	0.717672
2022-09-14	12:53:13	0.715534
2022-09-14	12:53:14	0.719504
2022-09-14	12:53:14	0.722404
2022-09-14	12:53:14	0.718842
2022-09-14	12:53:14	0.720827
2022-09-14	12:53:15	0.721794
2022-09-14	12:53:15	0.714873
2022-09-14	12:53:15	0.719198
2022-09-14	12:53:15	0.720979
2022-09-14	12:53:16	0.720013
2022-09-14	12:53:16	0.722914
2022-09-14	12:53:16	0.722914
2022-09-14	12:53:16	0.726578
2022-09-14	12:53:17	0.723219
2022-09-14	12:53:17	0.716908
2022-09-14	12:53:17	0.719453
2022-09-14	12:53:18	0.719351
2022-09-14	12:53:18	0.72383
2022-09-14	12:53:18	0.719809
2022-09-14	12:53:18	0.719046
2022-09-14	12:53:19	0.724898
2022-09-14	12:53:19	0.712837
2022-09-14	12:53:19	0.725
2022-09-14	12:53:19	0.72327
2022-09-14	12:53:20	0.719962
2022-09-14	12:53:20	0.723626
2022-09-14	12:53:20	0.724237
2022-09-14	12:53:21	0.72383
2022-09-14	12:53:21	0.720369
2022-09-14	12:53:21	0.724949
2022-09-14	12:53:21	0.721997
2022-09-14	12:53:22	0.718944
2022-09-14	12:53:22	0.716501
2022-09-14	12:53:22	0.719809
2022-09-14	12:53:22	0.720776
2022-09-14	12:53:23	0.722761
2022-09-14	12:53:23	0.725611
2022-09-14	12:53:23	0.720114
2022-09-14	12:53:23	0.723626
2022-09-14	12:53:24	0.719402
2022-09-14	12:53:24	0.716298
2022-09-14	12:53:24	0.724288
2022-09-14	12:53:25	0.717977
2022-09-14	12:53:25	0.719504
2022-09-14	12:53:25	0.72042
2022-09-14	12:53:25	0.725305
2022-09-14	12:53:26	0.722303
2022-09-14	12:53:26	0.722303
2022-09-14	12:53:26	0.724847
2022-09-14	12:53:26	0.721437
2022-09-14	12:53:27	0.719351
2022-09-14	12:53:27	0.72897
2022-09-14	12:53:27	0.718791
2022-09-14	12:53:27	0.718791
2022-09-14	12:53:28	0.723066
2022-09-14	12:53:28	0.71986
2022-09-14	12:53:28	0.716654
2022-09-14	12:53:29	0.714109
2022-09-14	12:53:29	0.719707
2022-09-14	12:53:29	0.721591
2022-09-14	12:53:29	0.722354
2022-09-14	12:53:30	0.720064
2022-09-14	12:53:30	0.727036
2022-09-14	12:53:30	0.721081
2022-09-14	12:53:30	0.719046
2022-09-14	12:53:31	0.721285
2022-09-14	12:53:31	0.717926
2022-09-14	12:53:31	0.720979
2022-09-14	12:53:31	0.722965
2022-09-14	12:53:32	0.720064
2022-09-14	12:53:32	0.72271
2022-09-14	12:53:32	0.72103
2022-09-14	12:53:33	0.723779
2022-09-14	12:53:33	0.717112
2022-09-14	12:53:33	0.723982
2022-09-14	12:53:33	0.721132
2022-09-14	12:53:34	0.719707
2022-09-14	12:53:34	0.717468
2022-09-14	12:53:34	0.716196
2022-09-14	12:53:34	0.721437
2022-09-14	12:53:35	0.713855
2022-09-14	12:53:35	0.718435
2022-09-14	12:53:35	0.726832
2022-09-14	12:53:36	0.719555
2022-09-14	12:53:36	0.715789
2022-09-14	12:53:36	0.71757
2022-09-14	12:53:36	0.722608
2022-09-14	12:53:37	0.720064
2022-09-14	12:53:37	0.71813
2022-09-14	12:53:37	0.725407
2022-09-14	12:53:38	0.719809
2022-09-14	12:53:38	0.720776
2022-09-14	12:53:38	0.715331
2022-09-14	12:53:38	0.724949
2022-09-14	12:53:38	0.722201
2022-09-14	12:53:39	0.718232
2022-09-14	12:53:39	0.720064
2022-09-14	12:53:39	0.72556
2022-09-14	12:53:40	0.723473
2022-09-14	12:53:40	0.720674
2022-09-14	12:53:40	0.717112
2022-09-14	12:53:40	0.726934
2022-09-14	12:53:41	0.732684
2022-09-14	12:53:41	0.729478
2022-09-14	12:53:41	0.717417
2022-09-14	12:53:41	0.722354
2022-09-14	12:53:42	0.719249
2022-09-14	12:53:42	0.72902
2022-09-14	12:53:42	0.722914
2022-09-14	12:53:42	0.728206
2022-09-14	12:53:43	0.718079
2022-09-14	12:53:43	0.722761
2022-09-14	12:53:43	0.717468
2022-09-14	12:53:44	0.721387
2022-09-14	12:53:44	0.722608
2022-09-14	12:53:44	0.71701
2022-09-14	12:53:44	0.724237
2022-09-14	12:53:45	0.72612
2022-09-14	12:53:45	0.726578
2022-09-14	12:53:45	0.721285
2022-09-14	12:53:45	0.729326
2022-09-14	12:53:46	0.730089
2022-09-14	12:53:46	0.720369
2022-09-14	12:53:46	0.72617
2022-09-14	12:53:46	0.723422
2022-09-14	12:53:47	0.723728
2022-09-14	12:53:47	0.720979
2022-09-14	12:53:47	0.719911
2022-09-14	12:53:48	0.727392
2022-09-14	12:53:48	0.715025
2022-09-14	12:53:48	0.721285
2022-09-14	12:53:48	0.720623
2022-09-14	12:53:49	0.718181
2022-09-14	12:53:49	0.720725
2022-09-14	12:53:49	0.715178
2022-09-14	12:53:49	0.718791
2022-09-14	12:53:50	0.726781
2022-09-14	12:53:50	0.723473
2022-09-14	12:53:50	0.720979
2022-09-14	12:53:50	0.724084
2022-09-14	12:53:51	0.724847
2022-09-14	12:53:51	0.726934
2022-09-14	12:53:51	0.725204
2022-09-14	12:53:52	0.724237
2022-09-14	12:53:52	0.718639
2022-09-14	12:53:52	0.720572
2022-09-14	12:53:52	0.721794
2022-09-14	12:53:53	0.724135
2022-09-14	12:53:53	0.725611
2022-09-14	12:53:53	0.720318
2022-09-14	12:53:53	0.723117
2022-09-14	12:53:54	0.721997
2022-09-14	12:53:54	0.714008
2022-09-14	12:53:54	0.717672
2022-09-14	12:53:55	0.732735
2022-09-14	12:53:55	0.722201
2022-09-14	12:53:55	0.721895
2022-09-14	12:53:55	0.721997
2022-09-14	12:53:56	0.723168
2022-09-14	12:53:56	0.715992
2022-09-14	12:53:56	0.721183
2022-09-14	12:53:56	0.73243
2022-09-14	12:53:57	0.721845
2022-09-14	12:53:57	0.719097
2022-09-14	12:53:57	0.727494
2022-09-14	12:53:57	0.728766
2022-09-14	12:53:58	0.719911
2022-09-14	12:53:58	0.70902
2022-09-14	12:53:58	0.713041
2022-09-14	12:53:59	0.725662
2022-09-14	12:53:59	0.719351
2022-09-14	12:53:59	0.723015
2022-09-14	12:53:59	0.724288
2022-09-14	12:54:00	0.725051
2022-09-14	12:54:00	0.721336
2022-09-14	12:54:00	0.722099
2022-09-14	12:54:00	0.721539
2022-09-14	12:54:01	0.720216
2022-09-14	12:54:01	0.724084
2022-09-14	12:54:01	0.716857
2022-09-14	12:54:01	0.719962
2022-09-14	12:54:02	0.72327
2022-09-14	12:54:02	0.719707
2022-09-14	12:54:02	0.716959
2022-09-14	12:54:03	0.720878
2022-09-14	12:54:03	0.721488
2022-09-14	12:54:03	0.724796
2022-09-14	12:54:03	0.725204
2022-09-14	12:54:04	0.718893
2022-09-14	12:54:04	0.725865
2022-09-14	12:54:04	0.724389
2022-09-14	12:54:04	0.724746
2022-09-14	12:54:05	0.7193
2022-09-14	12:54:05	0.720013
2022-09-14	12:54:05	0.722049
2022-09-14	12:54:05	0.714924
2022-09-14	12:54:06	0.720572
2022-09-14	12:54:06	0.724796
2022-09-14	12:54:06	0.712837
2022-09-14	12:54:07	0.723066
2022-09-14	12:54:07	0.718028
2022-09-14	12:54:07	0.716908
2022-09-14	12:54:07	0.723982
2022-09-14	12:54:08	0.722354
2022-09-14	12:54:08	0.721183
2022-09-14	12:54:08	0.720572
2022-09-14	12:54:08	0.721997
2022-09-14	12:54:09	0.725153
2022-09-14	12:54:09	0.721845
2022-09-14	12:54:09	0.724288
2022-09-14	12:54:09	0.711718
2022-09-14	12:54:10	0.727188
2022-09-14	12:54:10	0.714109
2022-09-14	12:54:10	0.722608
2022-09-14	12:54:11	0.715382
2022-09-14	12:54:11	0.725
2022-09-14	12:54:11	0.721946
2022-09-14	12:54:11	0.720318
2022-09-14	12:54:12	0.722049
2022-09-14	12:54:12	0.721692
2022-09-14	12:54:12	0.720267
2022-09-14	12:54:12	0.72215
2022-09-14	12:54:13	0.727748
2022-09-14	12:54:13	0.724186
2022-09-14	12:54:13	0.723117
2022-09-14	12:54:14	0.720929
2022-09-14	12:54:14	0.722354
2022-09-14	12:54:14	0.727646
2022-09-14	12:54:14	0.723524
2022-09-14	12:54:15	0.718028
2022-09-14	12:54:15	0.724491
2022-09-14	12:54:15	0.719046
2022-09-14	12:54:15	0.724796
2022-09-14	12:54:16	0.72103
2022-09-14	12:54:16	0.723321
2022-09-14	12:54:16	0.720725
2022-09-14	12:54:16	0.72042
2022-09-14	12:54:17	0.725814
2022-09-14	12:54:17	0.725458
2022-09-14	12:54:17	0.719148
2022-09-14	12:54:18	0.722761
2022-09-14	12:54:18	0.722862
2022-09-14	12:54:18	0.719707
2022-09-14	12:54:18	0.724135
2022-09-14	12:54:19	0.718588
2022-09-14	12:54:19	0.719962
2022-09-14	12:54:19	0.716399
2022-09-14	12:54:19	0.723015
2022-09-14	12:54:20	0.719148
2022-09-14	12:54:20	0.722557
2022-09-14	12:54:20	0.723372
2022-09-14	12:54:20	0.724135
2022-09-14	12:54:21	0.723626
2022-09-14	12:54:21	0.727443
2022-09-14	12:54:21	0.715687
2022-09-14	12:54:22	0.721946
2022-09-14	12:54:22	0.723015
2022-09-14	12:54:22	0.714924
2022-09-14	12:54:22	0.722404
2022-09-14	12:54:23	0.723066
2022-09-14	12:54:23	0.720929
2022-09-14	12:54:23	0.721845
2022-09-14	12:54:23	0.720929
2022-09-14	12:54:24	0.718842
2022-09-14	12:54:24	0.722049
2022-09-14	12:54:24	0.727341
2022-09-14	12:54:24	0.719758
2022-09-14	12:54:25	0.725662
2022-09-14	12:54:25	0.719453
2022-09-14	12:54:25	0.561845
2022-09-14	12:54:26	0.632328
2022-09-14	12:54:26	0.718639
2022-09-14	12:54:26	0.726883
2022-09-14	12:54:26	0.725204
2022-09-14	12:54:27	0.836145
2022-09-14	12:54:27	1.12902
2022-09-14	12:54:27	0.7193
2022-09-14	12:54:27	0.718384
2022-09-14	12:54:28	0.73187
2022-09-14	12:54:28	0.727596
2022-09-14	12:54:28	0.723779
2022-09-14	12:54:28	0.726578
2022-09-14	12:54:29	0.724338
2022-09-14	12:54:29	0.719351
2022-09-14	12:54:29	0.722761
2022-09-14	12:54:30	0.716247
2022-09-14	12:54:30	0.725254
2022-09-14	12:54:30	0.718232
2022-09-14	12:54:30	0.724135
2022-09-14	12:54:31	0.72388
2022-09-14	12:54:31	0.720216
2022-09-14	12:54:31	0.716908
2022-09-14	12:54:31	0.722965
2022-09-14	12:54:32	0.721997
2022-09-14	12:54:32	0.724389
2022-09-14	12:54:32	0.727646
2022-09-14	12:54:32	0.718486
2022-09-14	12:54:33	0.721997
2022-09-14	12:54:33	0.726221
2022-09-14	12:54:33	0.724491
2022-09-14	12:54:34	0.721845
2022-09-14	12:54:34	0.722354
2022-09-14	12:54:34	0.732532
2022-09-14	12:54:34	0.728919
2022-09-14	12:54:35	0.729936
2022-09-14	12:54:35	0.724644
2022-09-14	12:54:35	0.72327
2022-09-14	12:54:35	0.722812
2022-09-14	12:54:36	0.723626
2022-09-14	12:54:36	0.725611
2022-09-14	12:54:36	0.719911
2022-09-14	12:54:37	0.716043
2022-09-14	12:54:37	0.72612
2022-09-14	12:54:37	0.730751
2022-09-14	12:54:37	0.726883
2022-09-14	12:54:38	0.717316
2022-09-14	12:54:38	0.730445
2022-09-14	12:54:38	0.728308
2022-09-14	12:54:38	0.718995
2022-09-14	12:54:39	0.733092
2022-09-14	12:54:39	0.730496
2022-09-14	12:54:39	0.728817
2022-09-14	12:54:39	0.727697
2022-09-14	12:54:40	0.721336
2022-09-14	12:54:40	0.724898
2022-09-14	12:54:40	0.721895
2022-09-14	12:54:41	0.71243
2022-09-14	12:54:41	0.719148
2022-09-14	12:54:41	0.719198
2022-09-14	12:54:41	0.716196
2022-09-14	12:54:42	0.723372
2022-09-14	12:54:42	0.730089
2022-09-14	12:54:42	0.715789
2022-09-14	12:54:42	0.724033
2022-09-14	12:54:43	0.71472
2022-09-14	12:54:43	0.723066
2022-09-14	12:54:43	0.726985
2022-09-14	12:54:43	0.726832
2022-09-14	12:54:44	0.72556
2022-09-14	12:54:44	0.718079
2022-09-14	12:54:44	0.729529
2022-09-14	12:54:45	0.720827
2022-09-14	12:54:45	0.721692
2022-09-14	12:54:45	0.726578
2022-09-14	12:54:45	0.723626
2022-09-14	12:54:46	0.720623
2022-09-14	12:54:46	0.484186
2022-09-14	12:54:46	0.731667
2022-09-14	12:54:46	0.727392
2022-09-14	12:54:47	0.720827
2022-09-14	12:54:47	0.728664
2022-09-14	12:54:47	0.725051
2022-09-14	12:54:47	0.72897
2022-09-14	12:54:48	0.727494
2022-09-14	12:54:48	0.724237
2022-09-14	12:54:48	0.726629
2022-09-14	12:54:49	0.727392
2022-09-14	12:54:49	0.717366
2022-09-14	12:54:49	0.723066
2022-09-14	12:54:49	0.72388
2022-09-14	12:54:50	0.717468
2022-09-14	12:54:50	0.726578
2022-09-14	12:54:50	0.719402
2022-09-14	12:54:50	0.722404
2022-09-14	12:54:51	0.728461
2022-09-14	12:54:51	0.731616
2022-09-14	12:54:51	0.723575
2022-09-14	12:54:51	0.721743
2022-09-14	12:54:52	0.727545
2022-09-14	12:54:52	0.723066
2022-09-14	12:54:52	0.717824
2022-09-14	12:54:53	0.724288
2022-09-14	12:54:53	0.724949
2022-09-14	12:54:53	0.720878
2022-09-14	12:54:53	0.723015
2022-09-14	12:54:54	0.726832
2022-09-14	12:54:54	0.718893
2022-09-14	12:54:54	0.720572
2022-09-14	12:54:54	0.720725
2022-09-14	12:54:55	0.72444
2022-09-14	12:54:55	0.728104
2022-09-14	12:54:55	0.729886
2022-09-14	12:54:56	0.730801
2022-09-14	12:54:56	0.725865
2022-09-14	12:54:56	0.723982
2022-09-14	12:54:56	0.722914
2022-09-14	12:54:57	0.724491
2022-09-14	12:54:57	0.725763
2022-09-14	12:54:57	0.724542
2022-09-14	12:54:57	0.724949
2022-09-14	12:54:58	0.729173
2022-09-14	12:54:58	0.721285
2022-09-14	12:54:58	0.722404
2022-09-14	12:54:58	0.726832
2022-09-14	12:54:59	0.722914
2022-09-14	12:54:59	0.717112
2022-09-14	12:54:59	0.725967
2022-09-14	12:55:00	0.725458
2022-09-14	12:55:00	0.733244
2022-09-14	12:55:00	0.721997
2022-09-14	12:55:00	0.525102
2022-09-14	12:55:01	0.156654
2022-09-14	12:55:01	0.386323
2022-09-14	12:55:01	0.562557
2022-09-14	12:55:01	0.262761
2022-09-14	12:55:02	0.251463
2022-09-14	12:55:02	0.240776
2022-09-14	12:55:02	0.717774
2022-09-14	12:55:02	0.71874
2022-09-14	12:55:03	0.721234
2022-09-14	12:55:03	0.72327
2022-09-14	12:55:03	0.724288
2022-09-14	12:55:04	0.539249
2022-09-14	12:55:04	0.731565
2022-09-14	12:55:04	0.735941
2022-09-14	12:55:04	0.723422
2022-09-14	12:55:05	0.723473
2022-09-14	12:55:05	0.728868
2022-09-14	12:55:05	0.724746
2022-09-14	12:55:05	0.717672
2022-09-14	12:55:06	0.722507
2022-09-14	12:55:06	0.724491
2022-09-14	12:55:06	0.718232
2022-09-14	12:55:06	0.720776
2022-09-14	12:55:07	0.726934
2022-09-14	12:55:07	0.719758
2022-09-14	12:55:07	0.726221
2022-09-14	12:55:08	0.728766
2022-09-14	12:55:08	0.724949
2022-09-14	12:55:08	0.727239
2022-09-14	12:55:08	0.72617
2022-09-14	12:55:09	0.716552
2022-09-14	12:55:09	0.723524
2022-09-14	12:55:09	0.722252
2022-09-14	12:55:09	0.718282
2022-09-14	12:55:10	0.725662
2022-09-14	12:55:10	0.723219
2022-09-14	12:55:10	0.723677
2022-09-14	12:55:10	0.72215
2022-09-14	12:55:11	0.732786
2022-09-14	12:55:11	0.725509
2022-09-14	12:55:11	0.724491
2022-09-14	12:55:12	0.724847
2022-09-14	12:55:12	0.727494
2022-09-14	12:55:12	0.726425
2022-09-14	12:55:12	0.72958
2022-09-14	12:55:13	0.729886
2022-09-14	12:55:13	0.73187
2022-09-14	12:55:13	0.721234
2022-09-14	12:55:13	0.728461
2022-09-14	12:55:14	0.724898
2022-09-14	12:55:14	0.72729
2022-09-14	12:55:14	0.723066
2022-09-14	12:55:14	0.723066
2022-09-14	12:55:15	0.72958
2022-09-14	12:55:15	0.72785
2022-09-14	12:55:15	0.727952
2022-09-14	12:55:16	0.721591
2022-09-14	12:55:16	0.725254
2022-09-14	12:55:16	0.729936
2022-09-14	12:55:16	0.725407
2022-09-14	12:55:17	0.723473
2022-09-14	12:55:17	1.53676
2022-09-14	12:55:17	0.726272
2022-09-14	12:55:17	0.726832
2022-09-14	12:55:18	0.725153
2022-09-14	12:55:18	0.730343
2022-09-14	12:55:18	0.728817
2022-09-14	12:55:19	0.726323
2022-09-14	12:55:19	0.722914
2022-09-14	12:55:19	0.732634
2022-09-14	12:55:19	0.722965
2022-09-14	12:55:20	0.728562
2022-09-14	12:55:20	0.719656
2022-09-14	12:55:20	0.727392
2022-09-14	12:55:20	0.728868
2022-09-14	12:55:21	3.03579
2022-09-14	12:55:21	0.725204
2022-09-14	12:55:21	0.727239
2022-09-14	12:55:21	0.713906
2022-09-14	12:55:22	0.70388
2022-09-14	12:55:22	0.580623
2022-09-14	12:55:22	0.899351
2022-09-14	12:55:23	0.893702
2022-09-14	12:55:23	-0.0145926
2022-09-14	12:55:23	-0.377035
2022-09-14	12:55:23	-0.526959
2022-09-14	12:55:24	-0.602226
2022-09-14	12:55:24	-0.740699
2022-09-14	12:55:24	-0.773269
2022-09-14	12:55:24	-0.871183
2022-09-14	12:55:25	-0.92421
2022-09-14	12:55:25	-1.07271
2022-09-14	12:55:25	-1.17027
2022-09-14	12:55:25	-1.22416
2022-09-14	12:55:26	-1.30294
2022-09-14	12:55:26	-1.3921
2022-09-14	12:55:26	-1.62172
2022-09-14	12:55:27	-1.49347
2022-09-14	12:55:27	-1.38915
2022-09-14	12:55:27	-0.480139
2022-09-14	12:55:27	1.69813
2022-09-14	12:55:28	2.19604
2022-09-14	12:55:28	0.414771
2022-09-14	12:55:28	1.36006
2022-09-14	12:55:28	-0.00273512
2022-09-14	12:55:29	-0.273575
2022-09-14	12:55:29	-0.262175
2022-09-14	12:55:29	0.405
2022-09-14	12:55:29	-0.381921
2022-09-14	12:55:30	-0.887518
2022-09-14	12:55:30	-0.750267
2022-09-14	12:55:30	-0.481005
2022-09-14	12:55:31	0.181489
2022-09-14	12:55:31	0.232888
2022-09-14	12:55:31	-0.333931
2022-09-14	12:55:31	-0.53103
2022-09-14	12:55:32	-0.418918
2022-09-14	12:55:32	-0.453524
2022-09-14	12:55:32	-0.254949
2022-09-14	12:55:32	-0.19276
2022-09-14	12:55:33	-0.245229
2022-09-14	12:55:33	-0.156119
2022-09-14	12:55:33	-0.0377987
2022-09-14	12:55:33	-0.0227351
2022-09-14	12:55:34	-0.0406995
2022-09-14	12:55:34	0.000470984
2022-09-14	12:55:34	-0.318307
2022-09-14	12:55:35	-1.03179
2022-09-14	12:55:35	-1.21805
2022-09-14	12:55:35	-1.24635
2022-09-14	12:55:35	-1.27815
2022-09-14	12:55:36	-1.34925
2022-09-14	12:55:36	-1.4094
2022-09-14	12:55:36	-1.23139
2022-09-14	12:55:36	-1.38884
2022-09-14	12:55:37	-1.50553
2022-09-14	12:55:37	-1.6263
2022-09-14	12:55:37	-1.54803
2022-09-14	12:55:37	-1.80258
2022-09-14	12:55:38	-2.43617
2022-09-14	12:55:38	-2.05276
2022-09-14	12:55:38	-1.85327
2022-09-14	12:55:39	-1.08757
2022-09-14	12:55:39	-0.403142
2022-09-14	12:55:39	-1.11826
2022-09-14	12:55:39	-0.818205
2022-09-14	12:55:40	-1.19515
2022-09-14	12:55:40	-1.53393
2022-09-14	12:55:40	-1.59882
2022-09-14	12:55:40	-1.18655
2022-09-14	12:55:41	-1.36487
2022-09-14	12:55:41	-1.58732
2022-09-14	12:55:41	-1.38859
2022-09-14	12:55:41	-1.55683
2022-09-14	12:55:42	-1.49113
2022-09-14	12:55:42	-0.450979
2022-09-14	12:55:42	-0.249351
2022-09-14	12:55:43	-0.384363
2022-09-14	12:55:43	-0.316933
2022-09-14	12:55:43	-0.373575
2022-09-14	12:55:43	-0.373473
2022-09-14	12:55:44	-0.648027
2022-09-14	12:55:44	-0.780292
2022-09-14	12:55:44	-0.794999
2022-09-14	12:55:44	-0.882328
2022-09-14	12:55:45	-0.847417
2022-09-14	12:55:45	-0.832658
2022-09-14	12:55:45	-0.658765
2022-09-14	12:55:46	-0.515712
2022-09-14	12:55:46	-0.433066
2022-09-14	12:55:46	-0.398206
2022-09-14	12:55:46	-0.399681
2022-09-14	12:55:47	-0.183346
2022-09-14	12:55:47	-0.192964
2022-09-14	12:55:47	-0.245076
2022-09-14	12:55:47	-0.0278242
2022-09-14	12:55:48	-0.185178
2022-09-14	12:55:48	-0.122888
2022-09-14	12:55:48	-0.135305
2022-09-14	12:55:48	-0.0956613
2022-09-14	12:55:49	-0.0794272
2022-09-14	12:55:49	-0.0850761
2022-09-14	12:55:49	-0.0973915
2022-09-14	12:55:50	-0.104872
2022-09-14	12:55:50	0.106832
2022-09-14	12:55:50	-0.000597729
2022-09-14	12:55:50	0.280165
2022-09-14	12:55:51	0.199504
2022-09-14	12:55:51	0.325763
2022-09-14	12:55:51	0.266985
2022-09-14	12:55:51	0.282812
2022-09-14	12:55:52	0.260776
2022-09-14	12:55:52	0.244389
2022-09-14	12:55:52	0.366425
2022-09-14	12:55:52	0.258791
2022-09-14	12:55:53	0.356349
2022-09-14	12:55:53	0.351463
2022-09-14	12:55:53	0.27299
2022-09-14	12:55:54	0.354669
2022-09-14	12:55:54	0.376807
2022-09-14	12:55:54	0.529733
2022-09-14	12:55:54	0.533957
2022-09-14	12:55:55	0.47528
2022-09-14	12:55:55	0.439198
2022-09-14	12:55:55	0.407443
2022-09-14	12:55:55	0.420522
2022-09-14	12:55:56	0.479555
2022-09-14	12:55:56	0.476043
2022-09-14	12:55:56	0.36098
2022-09-14	12:55:56	0.381845
2022-09-14	12:55:57	0.373397
2022-09-14	12:55:57	0.309631
2022-09-14	12:55:57	0.315992
2022-09-14	12:55:58	0.22388
2022-09-14	12:55:58	0.285967
2022-09-14	12:55:58	0.604898
2022-09-14	12:55:58	0.391412
2022-09-14	12:55:59	0.482964
2022-09-14	12:55:59	0.365051
2022-09-14	12:55:59	0.409529
2022-09-14	12:55:59	0.469529
2022-09-14	12:56:00	0.418435
2022-09-14	12:56:00	0.473499
2022-09-14	12:56:00	0.448512
2022-09-14	12:56:00	0.381285
2022-09-14	12:56:01	0.37411
2022-09-14	12:56:01	0.43701
2022-09-14	12:56:01	0.303372
2022-09-14	12:56:02	0.384898
2022-09-14	12:56:02	0.426221
2022-09-14	12:56:02	0.39355
2022-09-14	12:56:02	0.515789
2022-09-14	12:56:03	0.544745
2022-09-14	12:56:03	0.545763
2022-09-14	12:56:03	0.458181
2022-09-14	12:56:03	0.505102
2022-09-14	12:56:04	0.295738
2022-09-14	12:56:04	0.31701
2022-09-14	12:56:04	0.421743
2022-09-14	12:56:04	0.500216
2022-09-14	12:56:05	0.511005
2022-09-14	12:56:05	0.775687
2022-09-14	12:56:05	0.834822
2022-09-14	12:56:06	0.747341
2022-09-14	12:56:06	0.569275
2022-09-14	12:56:06	0.506934
2022-09-14	12:56:06	0.519606
2022-09-14	12:56:07	0.537265
2022-09-14	12:56:07	0.637163
2022-09-14	12:56:07	0.945763
2022-09-14	12:56:07	1.27375
2022-09-14	12:56:08	1.30719
2022-09-14	12:56:08	1.1508
2022-09-14	12:56:08	1.18307
2022-09-14	12:56:08	1.00073
2022-09-14	12:56:09	0.86958
2022-09-14	12:56:09	0.800623
2022-09-14	12:56:09	0.812379
2022-09-14	12:56:10	0.867341
2022-09-14	12:56:10	0.857265
2022-09-14	12:56:10	0.923117
2022-09-14	12:56:10	0.910751
2022-09-14	12:56:11	0.858639
2022-09-14	12:56:11	0.885254
2022-09-14	12:56:11	0.739249
2022-09-14	12:56:11	0.702252
2022-09-14	12:56:12	0.830598
2022-09-14	12:56:12	0.651361
2022-09-14	12:56:12	0.630191
2022-09-14	12:56:12	0.638791
2022-09-14	12:56:13	0.721895
2022-09-14	12:56:13	0.657265
2022-09-14	12:56:13	0.560318
2022-09-14	12:56:14	0.540165
2022-09-14	12:56:14	0.518944
2022-09-14	12:56:14	0.573702
2022-09-14	12:56:14	0.601285
2022-09-14	12:56:15	0.643524
2022-09-14	12:56:15	0.63986
2022-09-14	12:56:15	0.646425
2022-09-14	12:56:15	0.675687
2022-09-14	12:56:16	0.642914
2022-09-14	12:56:16	0.596399
2022-09-14	12:56:16	0.534364
2022-09-14	12:56:17	0.488104
2022-09-14	12:56:17	0.502659
2022-09-14	12:56:17	0.473804
2022-09-14	12:56:17	0.505509
2022-09-14	12:56:18	0.513092
2022-09-14	12:56:18	0.502303
2022-09-14	12:56:18	0.485051
2022-09-14	12:56:18	0.523982
2022-09-14	12:56:19	0.584084
2022-09-14	12:56:19	0.581845
2022-09-14	12:56:19	0.574415
2022-09-14	12:56:19	0.617316
2022-09-14	12:56:20	0.660216
2022-09-14	12:56:20	0.672685
2022-09-14	12:56:20	0.686425
2022-09-14	12:56:21	0.696654
2022-09-14	12:56:21	0.858689
2022-09-14	12:56:21	1.10536
2022-09-14	12:56:21	1.02668
2022-09-14	12:56:22	1.05024
2022-09-14	12:56:22	0.884033
2022-09-14	12:56:22	0.985458
2022-09-14	12:56:22	0.960776
2022-09-14	12:56:23	0.959657
2022-09-14	12:56:23	0.980114
2022-09-14	12:56:23	1.13823
2022-09-14	12:56:23	1.15955
2022-09-14	12:56:24	1.22658
2022-09-14	12:56:24	1.31767
2022-09-14	12:56:24	1.04892
2022-09-14	12:56:25	0.975229
2022-09-14	12:56:25	0.984186
2022-09-14	12:56:25	1.02047
2022-09-14	12:56:25	1.07497
2022-09-14	12:56:26	1.17497
2022-09-14	12:56:26	1.11599
2022-09-14	12:56:26	0.791311
2022-09-14	12:56:26	0.434669
2022-09-14	12:56:27	-0.968892
2022-09-14	12:56:27	-1.23128
2022-09-14	12:56:27	-1.38558
2022-09-14	12:56:27	-1.50314
2022-09-14	12:56:28	-1.56961
2022-09-14	12:56:28	-1.60731
2022-09-14	12:56:28	-1.65703
2022-09-14	12:56:29	-1.70192
2022-09-14	12:56:29	-1.87312
2022-09-14	12:56:29	-1.93668
2022-09-14	12:56:29	-2.00548
2022-09-14	12:56:30	-2.05805
2022-09-14	12:56:30	-2.07225
2022-09-14	12:56:30	-2.18533
2022-09-14	12:56:30	-2.29805
2022-09-14	12:56:31	-2.55902
2022-09-14	12:56:31	-2.65357
2022-09-14	12:56:31	-2.92645
2022-09-14	12:56:31	-2.92736
2022-09-14	12:56:32	-3.15576
2022-09-14	12:56:32	-3.21159
2022-09-14	12:56:32	-3.52228
2022-09-14	12:56:33	-3.55978
2022-09-14	12:56:33	-3.46462
2022-09-14	12:56:33	-3.37515
2022-09-14	12:56:33	-3.33953
2022-09-14	12:56:34	-2.40085
2022-09-14	12:56:34	0.72785
2022-09-14	12:56:34	0.725305
2022-09-14	12:56:34	0.72841
2022-09-14	12:56:35	0.727188
2022-09-14	12:56:35	0.727239
2022-09-14	12:56:35	0.72271
2022-09-14	12:56:35	0.723422
2022-09-14	12:56:36	0.729377
2022-09-14	12:56:36	0.719198
2022-09-14	12:56:36	0.720521
2022-09-14	12:56:37	0.707952
2022-09-14	12:56:37	0.710293
2022-09-14	12:56:37	0.705814
2022-09-14	12:56:37	0.704288
2022-09-14	12:56:38	-0.348129
2022-09-14	12:56:38	-1.68823
2022-09-14	12:56:38	-1.65134
2022-09-14	12:56:38	-1.49785
2022-09-14	12:56:39	0.325102
2022-09-14	12:56:39	0.517519
2022-09-14	12:56:39	0.461743
2022-09-14	12:56:39	0.501132
2022-09-14	12:56:40	0.386272
2022-09-14	12:56:40	0.402252
2022-09-14	12:56:40	0.43584
2022-09-14	12:56:41	0.413651
2022-09-14	12:56:41	0.366018
2022-09-14	12:56:41	0.424338
2022-09-14	12:56:41	0.412735
2022-09-14	12:56:42	0.390903
2022-09-14	12:56:42	0.466629
2022-09-14	12:56:42	0.463982
2022-09-14	12:56:42	0.523168
2022-09-14	12:56:43	0.497367
2022-09-14	12:56:43	0.508155
2022-09-14	12:56:43	0.456603
2022-09-14	12:56:43	0.392023
2022-09-14	12:56:44	0.364644
2022-09-14	12:56:44	0.35472
2022-09-14	12:56:44	0.41757
2022-09-14	12:56:45	0.466069
2022-09-14	12:56:45	0.408461
2022-09-14	12:56:45	0.368461
2022-09-14	12:56:45	0.365814
2022-09-14	12:56:46	0.378537
2022-09-14	12:56:46	0.461998
2022-09-14	12:56:46	0.330089
2022-09-14	12:56:46	0.458384
2022-09-14	12:56:47	0.499758
2022-09-14	12:56:47	0.582761
2022-09-14	12:56:47	0.610496
2022-09-14	12:56:47	0.601081
2022-09-14	12:56:48	0.514262
2022-09-14	12:56:48	0.481183
2022-09-14	12:56:48	0.493804
2022-09-14	12:56:49	0.442456
2022-09-14	12:56:49	0.465356
2022-09-14	12:56:49	0.375026
2022-09-14	12:56:49	0.41757
2022-09-14	12:56:50	0.429886
2022-09-14	12:56:50	0.401641
2022-09-14	12:56:50	0.441336
2022-09-14	12:56:50	0.434568
2022-09-14	12:56:51	0.533804
2022-09-14	12:56:51	0.614822
2022-09-14	12:56:51	0.569479
2022-09-14	12:56:51	0.516043
2022-09-14	12:56:52	0.582303
2022-09-14	12:56:52	0.443524
2022-09-14	12:56:52	0.476349
2022-09-14	12:56:53	0.520471
2022-09-14	12:56:53	0.510038
2022-09-14	12:56:53	0.915534
2022-09-14	12:56:53	1.60128
2022-09-14	12:56:54	2.8993
2022-09-14	12:56:54	3.73375
2022-09-14	12:56:54	3.50327
2022-09-14	12:56:54	2.4109
2022-09-14	12:56:55	1.96933
2022-09-14	12:56:55	1.91299
2022-09-14	12:56:55	3.12434
2022-09-14	12:56:56	3.18088
2022-09-14	12:56:56	2.51375
2022-09-14	12:56:56	2.29248
2022-09-14	12:56:56	1.6363
2022-09-14	12:56:57	1.32301
2022-09-14	12:56:57	1.08561
2022-09-14	12:56:57	0.859962
2022-09-14	12:56:57	0.717316
2022-09-14	12:56:58	0.479249
2022-09-14	12:56:58	-1.06116
2022-09-14	12:56:58	-1.57047
2022-09-14	12:56:58	-0.960089
2022-09-14	12:56:59	-0.705127
2022-09-14	12:56:59	-0.991437
2022-09-14	12:56:59	0.667901
2022-09-14	12:57:00	0.734466
2022-09-14	12:57:00	0.454517
2022-09-14	12:57:00	-0.597239
2022-09-14	12:57:00	-0.650877
2022-09-14	12:57:01	-0.72762
2022-09-14	12:57:01	-1.75342
2022-09-14	12:57:01	0.653295
2022-09-14	12:57:01	0.655433
2022-09-14	12:57:02	0.693499
2022-09-14	12:57:02	1.15375
2022-09-14	12:57:02	1.08714
2022-09-14	12:57:02	0.470649
2022-09-14	12:57:03	-0.496781
2022-09-14	12:57:03	-0.534694
2022-09-14	12:57:03	-0.577951
2022-09-14	12:57:04	-0.486043
2022-09-14	12:57:04	-0.572913
2022-09-14	12:57:04	-0.500394
2022-09-14	12:57:04	-0.298308
2022-09-14	12:57:05	-0.31159
2022-09-14	12:57:05	1.04668
2022-09-14	12:57:05	1.44653
2022-09-14	12:57:05	2.03187
2022-09-14	12:57:06	0.917875
2022-09-14	12:57:06	0.707087
2022-09-14	12:57:06	0.727697
2022-09-14	12:57:06	0.711107
2022-09-14	12:57:07	0.689733
2022-09-14	12:57:07	0.692684
2022-09-14	12:57:07	0.700063
2022-09-14	12:57:08	0.63818
2022-09-14	12:57:08	0.585509
2022-09-14	12:57:08	0.554567
2022-09-14	12:57:08	0.544186
2022-09-14	12:57:09	0.516043
2022-09-14	12:57:09	0.594924
2022-09-14	12:57:09	0.658791
2022-09-14	12:57:09	0.573702
2022-09-14	12:57:10	0.660674
2022-09-14	12:57:10	0.472532
2022-09-14	12:57:10	0.54159
2022-09-14	12:57:10	0.436807
2022-09-14	12:57:11	0.43701
2022-09-14	12:57:11	0.305713
2022-09-14	12:57:11	0.276094
2022-09-14	12:57:12	0.243066
2022-09-14	12:57:12	0.257672
2022-09-14	12:57:12	0.263473
2022-09-14	12:57:12	0.225458
2022-09-14	12:57:13	0.187595
2022-09-14	12:57:13	-0.0417682
2022-09-14	12:57:13	-0.137595
2022-09-14	12:57:13	0.496959
2022-09-14	12:57:14	0.773702
2022-09-14	12:57:14	0.424898
2022-09-14	12:57:14	0.690242
2022-09-14	12:57:14	0.409021
2022-09-14	12:57:15	0.693091
2022-09-14	12:57:15	0.520674
2022-09-14	12:57:15	0.660012
2022-09-14	12:57:16	0.470089
2022-09-14	12:57:16	0.619707
2022-09-14	12:57:16	0.634059
2022-09-14	12:57:16	0.547086
2022-09-14	12:57:17	0.54729
2022-09-14	12:57:17	0.495585
2022-09-14	12:57:17	0.612888
2022-09-14	12:57:17	0.461845
2022-09-14	12:57:18	0.605967
2022-09-14	12:57:18	0.50271
2022-09-14	12:57:18	0.534058
2022-09-14	12:57:18	0.603779
2022-09-14	12:57:19	0.766272
2022-09-14	12:57:19	0.962099
2022-09-14	12:57:19	0.532125
2022-09-14	12:57:20	0.525662
2022-09-14	12:57:20	0.573804
2022-09-14	12:57:20	0.492685
2022-09-14	12:57:20	0.50668
2022-09-14	12:57:21	0.407443
2022-09-14	12:57:21	0.381132
2022-09-14	12:57:21	0.445967
2022-09-14	12:57:21	0.471769
2022-09-14	12:57:22	0.422201
